# Supplementary material for: Cytochrome c oxidase dependent respiration is essential for T cell activation, proliferation and memory formation
Source: Nat Commun. 2025 Dec 4;16:10898. doi: 10.1038/s41467-025-65910-w (PMC12678437; doi:10.1038/s41467-025-65910-w)
Supplement: Supplementary file 3 — Supplementary Data 1 [file 41467_2025_65910_MOESM3_ESM.xlsx]

## Sheet: TCox10Aox_vs_WT_IL15
gene_name	baseMean	log2FoldChange	lfcSE	stat	pvalue	padj
Eef1a1	369212	0.212773	0.0619646	3.43378	0.000595226	0.0177108
mt-Co1	268517	0.472074	0.0420506	11.2263	3.02817e-29	1.07772e-25
Actb	200199	0.0518887	0.0678965	0.764232	0.444729	0.806826
Eef2	182265	0.135682	0.0567684	2.39009	0.0168441	0.167397
Rplp0	101302	0.181258	0.0710989	2.54938	0.0107915	0.129463
Rpsa	94093.6	0.215396	0.0760138	2.83364	0.00460215	0.0761817
Myh9	91593.7	-0.0388915	0.0836226	-0.465084	0.641872	0.898141
Tmsb4x	84836.7	-0.0469133	0.101828	-0.460711	0.645006	0.899961
Coro1a	79642.5	0.0484405	0.074905	0.646693	0.517831	0.846385
Rpl4	76650.3	0.269705	0.0702701	3.83813	0.000123977	0.00571178
Tubb5	74067.7	-0.0267511	0.0829002	-0.32269	0.74693	0.936706
Pabpc1	73885.7	0.0960921	0.0513687	1.87063	0.0613957	0.350158
Actg1	69913.7	0.0571082	0.075082	0.760612	0.446889	0.808939
Tpt1	68599	0.219021	0.0823443	2.65982	0.00781833	0.107156
Pfn1	62149	0.0178307	0.0511176	0.348818	0.727226	0.932505
mt-Cytb	60832.2	0.161531	0.0627582	2.57386	0.0100572	0.124934
Ptprc	59890.8	0.0939272	0.0856857	1.09618	0.272999	0.684589
mt-Nd5	58116.9	0.232097	0.0868435	2.67259	0.00752687	0.104234
Hsp90ab1	56022.7	0.151484	0.0626648	2.41737	0.0156332	0.16011
Rpl13	54848.7	0.25951	0.0790728	3.28192	0.00103104	0.0265904
Rpl3	54484.2	0.11343	0.0601782	1.8849	0.0594432	0.344698
Rack1	53141.2	0.191649	0.0781482	2.45238	0.0141916	0.151221
B2m	52805.1	0.0956699	0.100727	0.949793	0.342218	0.73816
Vim	52117.4	-0.118458	0.0869238	-1.36278	0.172952	0.573928
Hspa8	50948.4	0.00576939	0.0691826	0.0833936	0.933539	0.984742
Rps6	48134.8	0.299834	0.0687364	4.36208	1.28832e-05	0.000996765
Rplp1	47918.1	0.223904	0.0848417	2.63908	0.00831308	0.111646
Rpl8	47651.5	0.166489	0.0829642	2.00676	0.0447752	0.294965
Rps3	47242.9	0.274838	0.0616017	4.46154	8.13745e-06	0.000685472
Arhgef1	46862.7	0.086148	0.0546191	1.57725	0.114738	0.481882
Rps3a1	46977	0.0754095	0.0837274	0.900654	0.367772	0.757466
Flna	46611.8	-0.137241	0.139733	-0.982162	0.32602	0.724879
Arhgap45	46343	-0.0162069	0.0412524	-0.392871	0.694415	0.920446
Laptm5	45991.1	-0.0201166	0.042401	-0.474436	0.635189	0.895498
Thy1	46036.9	0.118894	0.0514846	2.30932	0.0209261	0.192444
Cfl1	45755.3	0.0382286	0.0695054	0.550009	0.582313	0.878653
mt-Nd1	45545.1	0.013166	0.0803574	0.163842	0.869855	0.97084
Lcp1	45466.3	-0.16586	0.0613122	-2.70517	0.00682697	0.0974998
Rps2	45312.5	0.198634	0.0755732	2.62836	0.00857966	0.113975
Rps4x	44070.8	0.216584	0.0752247	2.87916	0.00398731	0.0697339
Rps9	43859.4	0.194222	0.0705707	2.75216	0.00592033	0.0895797
Top2a	41463	-0.124491	0.0816133	-1.52537	0.127166	0.506387
Mbnl1	41075	0.339606	0.0642703	5.28403	1.26373e-07	1.99894e-05
Rac2	40185	-0.0275249	0.0719796	-0.382399	0.702166	0.923476
Rpl18a	40270.6	0.228441	0.083609	2.73225	0.00629037	0.0932437
Rps18	40208.7	0.249536	0.0684884	3.64348	0.000268973	0.0102109
Pik3cd	39613.7	0.0498424	0.0486718	1.02405	0.305811	0.711313
Ptma	39631.9	-0.0221587	0.0788788	-0.28092	0.778772	0.946601
Shisa5	38962.7	-0.0847515	0.0809912	-1.04643	0.295364	0.701366
Tln1	38359.4	0.0160311	0.067586	0.237196	0.812505	0.955304
Ly6e	38227.1	0.227999	0.113659	2.00599	0.0448574	0.295233
Srrm2	36834	0.0211332	0.13529	0.156206	0.87587	0.971662
Ddx5	36912.4	-0.116837	0.0455166	-2.56691	0.0102609	0.126345
Rpl6	36468.8	0.117632	0.0733261	1.60423	0.108663	0.468908
Tmsb10	36459.3	0.000446939	0.0973202	0.00459246	0.996336	0.998817
Rpl7	36238	0.112399	0.0791278	1.42048	0.155468	0.550062
Rpl5	35923.6	0.222042	0.0657853	3.37525	0.000737478	0.0208723
Hnrnpa2b1	35597.1	-0.00269072	0.0466406	-0.0576904	0.953995	0.989081
Msn	34803.7	-0.00225701	0.063071	-0.0357853	0.971454	0.993045
Mki67	34673.6	-0.0947847	0.116285	-0.815105	0.415012	0.790911
Rpl18	34466.4	0.23995	0.073335	3.27197	0.001068	0.027263
Rps5	32883.3	0.247528	0.0910488	2.71863	0.00655529	0.0952124
Itgb7	32760.1	0.219717	0.0779782	2.81767	0.00483734	0.0790635
Esyt1	32651.4	-0.0916438	0.0598809	-1.53044	0.125909	0.503777
Rps7	32175.4	0.200898	0.0887424	2.26384	0.0235842	0.206358
Rpl10	32099.3	0.131683	0.0769605	1.71104	0.0870738	0.42177
Actr3	31892.9	-0.00101816	0.0614058	-0.0165808	0.986771	0.99609
Rps8	31934.6	0.204977	0.0873359	2.347	0.0189253	0.180197
Rpl12	31853.5	0.284289	0.0809023	3.51398	0.000441446	0.014161
Rpl32	31589.8	0.286693	0.0735909	3.89577	9.7888e-05	0.00481713
Rps14	31560.4	0.241562	0.0817224	2.95588	0.00311776	0.0578676
Ahnak	31003.2	0.00176217	0.130772	0.0134751	0.989249	0.996707
Hnrnpu	30959.5	-0.0813785	0.0625617	-1.30077	0.193336	0.597968
Ppia	30966.9	-0.0658226	0.0951325	-0.691904	0.488997	0.831098
Rps24	30617.8	0.270334	0.094634	2.85663	0.00428166	0.0729984
Tuba1b	30183.9	-0.139044	0.0952695	-1.45948	0.144433	0.53424
Rps16	29961.1	0.270173	0.0735854	3.67156	0.000241079	0.00955943
Rpl41	29889.8	0.175869	0.0801058	2.19545	0.0281311	0.229605
Rps26	29863.2	0.121772	0.0882592	1.37971	0.167677	0.566975
Anxa6	29558.3	-0.0866185	0.0695386	-1.24562	0.212904	0.61907
Il2rb	28991.5	-0.342667	0.0663917	-5.1613	2.45241e-07	3.60983e-05
Hmgb2	28225.6	0.0251468	0.0853754	0.294544	0.768342	0.942615
Rpl10a	27980.6	0.153775	0.0784261	1.96076	0.0499065	0.313258
Trbc2	27845.2	-0.315192	0.238412	-1.32205	0.186152	0.588612
Itgal	27785.2	0.0501457	0.0678678	0.738873	0.459984	0.81662
Rps23	27696.1	0.285021	0.0829929	3.43428	0.000594121	0.0177108
mt-Nd4	27283.8	-0.0461275	0.0664089	-0.694599	0.487307	0.830428
Fau	27279.7	0.207253	0.0815086	2.54271	0.0109996	0.131148
Selplg	27203.4	-0.0991317	0.0610405	-1.62403	0.104369	0.460666
Gm23935	27150.1	0.172245	0.119635	1.43976	0.149936	0.541735
Samhd1	26934.1	-0.15773	0.0925151	-1.70491	0.0882116	0.424681
Rpl27a	27067	0.223161	0.0836307	2.66841	0.00762102	0.105248
Rps15a	26704.8	0.145916	0.0994066	1.46787	0.142139	0.530406
Rpl19	26568.8	0.112176	0.0797562	1.40649	0.159579	0.556727
Ms4a4b	26365.4	0.0220778	0.0863548	0.255664	0.79821	0.950415
Rps15	26105	0.262915	0.0859754	3.05803	0.00222799	0.0457027
Gnai2	25989.2	-0.0244119	0.0649975	-0.375582	0.707228	0.925256
Cnn2	25864.1	0.00324416	0.0644228	0.0503573	0.959838	0.990938
Gimap3	25747.3	0.0294352	0.0721166	0.408161	0.683156	0.915936
Fmnl1	25757.1	0.0927409	0.0406559	2.28112	0.0225414	0.202078
Rps20	25702.4	0.114919	0.0922579	1.24563	0.212901	0.61907
Eef1g	25501.4	0.160639	0.0733173	2.19101	0.0284513	0.231051
Rps11	25437.4	0.262283	0.0721585	3.63482	0.00027818	0.0103394
Rplp2	25282.9	0.267565	0.0746321	3.58512	0.000336918	0.0117457
Rps19	25260.6	0.241437	0.0731651	3.29989	0.000967231	0.025405
mt-Nd2	24983.1	-0.12792	0.0973393	-1.31416	0.188792	0.591301
Rpl11	25148.9	0.217813	0.092792	2.34732	0.0189089	0.180197
Ubb	24961.9	-0.0190277	0.081832	-0.232521	0.816133	0.956526
Rpl28	24656.9	0.199057	0.0899931	2.21192	0.0269722	0.223421
Rasal3	24277	0.052646	0.0429563	1.22557	0.22036	0.629549
Eno1	24310.1	-0.10684	0.0940943	-1.13546	0.256182	0.668536
Lck	24233.5	0.0479739	0.0581015	0.825692	0.408979	0.788492
Nup210	23919	0.158044	0.0759136	2.0819	0.0373517	0.265339
Tcf7	23481.2	0.0166538	0.0913237	0.18236	0.8553	0.966817
Rsrp1	23437.2	0.00520439	0.0954265	0.0545381	0.956506	0.990315
Atp5b	23344.1	0.113286	0.0738062	1.53492	0.124804	0.501567
Jak1	23176.2	-0.240118	0.0629543	-3.81417	0.000136643	0.00618519
Tpm3	23175.6	-0.000183899	0.0543903	-0.0033811	0.997302	0.99916
Lgals1	23141.5	-0.200945	0.129569	-1.55087	0.120932	0.494142
Eif4g2	22949.1	-0.0226167	0.046827	-0.482985	0.629107	0.894545
Gimap4	22898.8	-0.143867	0.101614	-1.41582	0.156829	0.551944
Pkm	22840.1	0.0103964	0.0795848	0.130633	0.896066	0.976385
Arl6ip1	22625.1	-0.00665701	0.0821081	-0.0810762	0.935381	0.985138
Aes	22608.3	0.0844246	0.0747071	1.13007	0.258445	0.670289
Plec	22322.8	-0.174716	0.135004	-1.29415	0.195612	0.600159
Sun2	22355.2	0.115093	0.0440484	2.61288	0.0089782	0.116786
Rpl9	22218.1	0.240054	0.0768074	3.1254	0.00177566	0.0393131
Macf1	21845.6	-0.0703737	0.322038	-0.218526	0.827019	0.958414
Ablim1	21963.6	-0.13599	0.0732687	-1.85605	0.0634464	0.355137
Arl4c	21948.8	-0.0580435	0.148473	-0.390937	0.695844	0.921054
Atp2a3	21841.6	-0.0368835	0.0632607	-0.58304	0.559866	0.868977
Calm1	21808.1	-0.107508	0.0852224	-1.2615	0.207128	0.613411
Prrc2a	21471.9	0.0605485	0.0771905	0.784403	0.432804	0.801236
Arhgdib	21500.2	-0.0860615	0.0699965	-1.22951	0.21888	0.628076
Cap1	21429	-0.00130424	0.0644189	-0.0202462	0.983847	0.995452
Sf3b1	21313.4	0.0235269	0.074906	0.314086	0.753456	0.938293
Rpl14	21370.9	0.196159	0.0644697	3.04265	0.00234501	0.0472855
Arhgdia	21334.8	-0.070858	0.0774432	-0.914968	0.360208	0.751015
Ets1	21239.9	-0.0738378	0.0580672	-1.27159	0.203518	0.609592
Ucp2	21200	0.0141375	0.0715011	0.197724	0.843261	0.964042
Atp5a1	20896.7	0.0510254	0.0680549	0.749768	0.453394	0.813487
Rps13	20892	0.155823	0.0793536	1.96365	0.049571	0.312155
Serinc3	20689.9	-0.0351015	0.0894939	-0.392222	0.694894	0.920542
Ncapd2	20602.3	-0.0349687	0.0666699	-0.524505	0.599927	0.886091
Chd3	20450.7	0.242194	0.0977877	2.47674	0.0132589	0.145084
Iqgap1	20419.6	-0.113034	0.0582268	-1.94126	0.0522264	0.32061
Eif4b	20427.4	0.0836625	0.0417131	2.00566	0.044892	0.295325
Eif3f	20208.9	0.0951375	0.0586868	1.62111	0.104995	0.462143
Lsp1	20179.9	-0.153966	0.0803349	-1.91656	0.0552943	0.33144
Hnrnpa0	20165.4	-0.00516874	0.0720471	-0.0717411	0.942808	0.986767
Cotl1	19970.2	-0.0293986	0.0682015	-0.431055	0.666428	0.909245
Prex1	19865	-0.356036	0.103879	-3.42741	0.000609375	0.0179981
Ncl	19897.7	0.0903553	0.0593173	1.52325	0.127695	0.507282
Grk2	19826.4	0.0508084	0.0400453	1.26877	0.204522	0.610714
Cd8a	19555.8	-0.0673576	0.153064	-0.440061	0.659893	0.906741
Dock2	19504.5	-0.0915626	0.0738438	-1.23995	0.214994	0.62203
Limd2	19551.8	0.0742616	0.0593049	1.2522	0.210497	0.615956
Ogt	19379.5	-0.0244058	0.125452	-0.194542	0.845751	0.964163
Nbeal2	19431.3	-0.142949	0.0686195	-2.08322	0.0372316	0.265128
Ybx1	19358.4	0.0382004	0.0871351	0.438404	0.661093	0.9074
Sept9	19277.1	-0.00387654	0.0584688	-0.066301	0.947138	0.987655
Dgka	19106.9	0.0464475	0.0744929	0.623515	0.532946	0.856323
Ms4a6b	19073.7	-0.131857	0.0630835	-2.0902	0.0366002	0.262426
Akap13	19024.4	-0.130577	0.11573	-1.12829	0.259196	0.671627
Spn	19058.4	-0.170058	0.0532254	-3.19506	0.00139801	0.0332255
Ywhaz	18890.3	-0.0619599	0.0568876	-1.08916	0.276082	0.686873
Ddx17	18823.8	0.142986	0.069734	2.05044	0.0403211	0.277434
Oaz1	18864.7	-0.0203853	0.0986682	-0.206605	0.836319	0.961929
Lmnb1	18754.5	-0.0347375	0.090987	-0.381785	0.702621	0.923476
Gm42047	18587.5	0.120266	0.320041	0.375784	0.707077	0.925256
Mknk2	18574.6	-0.0673508	0.0595917	-1.1302	0.25839	0.670289
Hp1bp3	18552.5	0.0373283	0.03873	0.96381	0.335141	0.731535
Son	18453.4	-0.0313846	0.0948812	-0.330778	0.740812	0.93559
Wnk1	18438.5	0.102019	0.0949637	1.0743	0.282689	0.69298
H2afy	18322.2	-0.0354776	0.0709898	-0.499757	0.617246	0.890042
Cyfip2	18266.7	-0.0698056	0.04927	-1.4168	0.156542	0.551617
mt-Nd6	18234.7	0.297171	0.103319	2.87625	0.00402432	0.0701227
Maz	18164	0.243669	0.0496549	4.90725	9.23604e-07	0.000110491
Rpl27	18165.5	0.146659	0.085594	1.71342	0.0866345	0.420788
Atp1a1	18028.8	-0.16888	0.110873	-1.52319	0.127711	0.507282
Ldha	18059.6	-0.00765158	0.0818878	-0.0934398	0.925554	0.983424
Eef1b2	18060.9	0.186312	0.0720798	2.58481	0.00974328	0.12264
Saraf	17980.5	0.0935553	0.0517739	1.807	0.0707623	0.376307
Zfp36l2	17951	0.0650979	0.0583564	1.11552	0.264627	0.675857
Smc4	17823.6	-0.00920053	0.0508474	-0.180944	0.856412	0.966817
Serbp1	17822.7	0.0766084	0.070822	1.0817	0.279384	0.689548
Uba1	17759.6	0.0178925	0.0527926	0.338921	0.734669	0.934369
Rpl15	17692.7	0.183043	0.0910087	2.01127	0.0442972	0.292792
Dnmt1	17632.8	-0.0556124	0.080958	-0.686929	0.492127	0.832156
Rps25	17652.5	0.213539	0.0879527	2.42788	0.0151873	0.157585
Kif21b	17517.8	0.015852	0.112491	0.140918	0.887935	0.974923
Tmpo	17594.6	-0.0868389	0.070084	-1.23907	0.21532	0.62233
Hjurp	17548.2	-0.0632312	0.0639481	-0.98879	0.322766	0.722468
Eif5a	17565	-0.103833	0.0822454	-1.26248	0.206778	0.613187
Myo1g	17336.9	-0.132047	0.0483328	-2.73204	0.00629441	0.0932437
Wdr1	17254.2	-0.0249184	0.0614229	-0.405686	0.684974	0.916471
Snrnp70	17089	-0.0407676	0.11121	-0.366582	0.713931	0.92753
Tubb4b	17126.3	-0.124539	0.091615	-1.35937	0.174029	0.574698
B4galnt1	17061.9	0.0200134	0.0542871	0.368659	0.712382	0.92667
Cd52	17052.7	0.107298	0.115887	0.925886	0.354505	0.746277
Grap2	16889.6	-0.131273	0.093407	-1.40539	0.159906	0.556757
Ppp1ca	17016.3	-0.0520501	0.0861205	-0.604387	0.545586	0.863853
Hnrnpa1	16970	-0.00877034	0.0706388	-0.124158	0.901191	0.978246
Rps12	17020	0.348295	0.133091	2.61697	0.0088715	0.116175
Chd4	16834	-0.146923	0.0663455	-2.21451	0.0267938	0.222828
Prrc2c	16761	-0.0567668	0.135382	-0.419309	0.67499	0.912753
Adcy7	16781.7	-0.142254	0.0714992	-1.98959	0.0466364	0.302242
Itm2b	16860.8	0.157883	0.116771	1.35208	0.176349	0.577653
Arpc1b	16805.7	-0.0479766	0.0881008	-0.544565	0.586053	0.879393
Ctsw	16741.6	0.145861	0.0777842	1.8752	0.0607653	0.349235
Rpl37a	16773	0.262804	0.0938579	2.80002	0.00510988	0.0818635
Fam107b	16684.4	-0.13579	0.0501914	-2.70544	0.00682141	0.0974998
Rpl26	16739.7	0.234285	0.0861825	2.71847	0.00655837	0.0952124
Hnrnpul1	16669.6	0.104187	0.049819	2.0913	0.0365008	0.262304
Hnrnpk	16636.4	-0.0303191	0.0472371	-0.64185	0.520971	0.84838
Actr2	16611.9	-0.0300789	0.0594532	-0.505926	0.612909	0.889152
Prkar1a	16438.2	-0.0243125	0.0574995	-0.42283	0.672419	0.911769
Eif4a1	16427.8	0.0146112	0.0729726	0.200229	0.841301	0.963383
Abca2	16383.4	0.145965	0.0889369	1.64122	0.100751	0.450948
Ikzf1	16307.7	-0.0433283	0.0515561	-0.84041	0.400679	0.781814
Zc3hav1	16222.3	-0.117498	0.0392268	-2.99534	0.00274138	0.053097
Sema4d	16148.7	-0.29079	0.0796639	-3.65021	0.000262025	0.0100274
H3f3b	16153.5	-0.00334282	0.0730982	-0.0457305	0.963525	0.991811
Sept1	16130.8	0.0480777	0.0627196	0.76655	0.443349	0.806737
Top2b	16035.1	-0.239111	0.0518619	-4.61053	4.01652e-06	0.000383753
Stmn1	15999.1	-0.135162	0.0846132	-1.59741	0.110174	0.472018
Rpl23a	16023.6	0.233747	0.0808902	2.88968	0.00385628	0.0681963
Gm8995	15797.1	-0.168905	0.134438	-1.25637	0.208981	0.615385
Itgb1	15862.4	-0.575458	0.0901809	-6.38115	1.75765e-10	6.10289e-08
Hnrnpl	15834.7	-0.00243537	0.0502755	-0.0484404	0.961365	0.991277
Rps27a	15853.2	0.345636	0.137147	2.52019	0.011729	0.135751
Prpf8	15710.6	0.0411607	0.0876117	0.469808	0.638492	0.896586
Sfpq	15654.2	-0.0877833	0.077465	-1.1332	0.25713	0.66914
Rpl17	15718.1	0.497205	0.150545	3.3027	0.000957588	0.0252547
Tap1	15603.1	0.134585	0.0942293	1.42827	0.153214	0.546931
Itk	15549.2	-0.225612	0.0395471	-5.70489	1.16416e-08	2.51106e-06
Acap1	15596.1	0.223679	0.0535264	4.17886	2.92975e-05	0.00191321
Arpc2	15498.5	0.00943021	0.0708248	0.133148	0.894076	0.976262
Itgb2	15479.6	-0.0392787	0.0677353	-0.579886	0.561992	0.870283
Nop53	15486.7	0.209813	0.0660453	3.17681	0.00148904	0.0344345
Rpl31	15472.8	0.216441	0.10526	2.05625	0.0397587	0.275684
Numa1	15383.3	0.0169318	0.0572415	0.295795	0.767386	0.942563
Clic1	15435.1	-0.00605232	0.096486	-0.0627275	0.949984	0.988161
Rbm3	15394.8	0.115847	0.0735003	1.57615	0.114991	0.482109
Psap	15331.9	-0.0590429	0.0507153	-1.1642	0.244342	0.655885
Akna	15290.2	-0.00458585	0.0420324	-0.109103	0.913121	0.980217
Rpl23	15259.8	0.273952	0.0793753	3.45135	0.000557789	0.0169311
Grk6	15178.1	0.056223	0.0686643	0.81881	0.412895	0.790259
Vars	15148.6	0.0640111	0.066314	0.965273	0.334408	0.730635
Tagln2	15105.4	0.0128342	0.0970498	0.132244	0.894792	0.976262
Prrc2b	14978.6	-0.0440865	0.0992594	-0.444155	0.656931	0.905418
Huwe1	14931.3	-0.00040368	0.153298	-0.00263329	0.997899	0.99918
Arhgap30	14977.2	0.0143641	0.0738452	0.194516	0.845772	0.964163
Hdac7	14988	0.0256313	0.0881367	0.290814	0.771194	0.943878
Ddx6	14936.1	-0.0857048	0.0658932	-1.30066	0.193375	0.597968
Cdc42	14975.2	-0.0480055	0.065812	-0.729434	0.465737	0.818954
Tmbim6	14953.5	-0.0320232	0.0706634	-0.453179	0.65042	0.903618
Atxn2l	14872.9	0.207252	0.0633875	3.2696	0.00107698	0.0273295
Gramd1a	14861.4	0.1315	0.0624306	2.10633	0.0351755	0.25799
Rpl29	14774.7	0.205008	0.0852658	2.40434	0.0162015	0.163346
Lfng	14699.4	-0.17297	0.0752157	-2.29965	0.0214683	0.196767
Nono	14696.8	0.0194184	0.0589053	0.329654	0.741661	0.935685
Gpi1	14690.4	0.109707	0.0569523	1.9263	0.0540672	0.327532
Rpl34	14670	0.190508	0.0893407	2.13238	0.0329759	0.249434
Rad21	14635.7	-0.0498682	0.0683278	-0.729837	0.46549	0.818954
Sema4a	14584.8	-0.131351	0.042274	-3.10714	0.00188908	0.0408316
Npm1	14611	0.218082	0.0772229	2.82406	0.00474193	0.0782225
Sf1	14483.2	-0.0103102	0.0741012	-0.139136	0.889343	0.975197
BC005537	14491.9	0.0478132	0.0408805	1.16959	0.242168	0.654236
Ewsr1	14459	-0.00569955	0.0601748	-0.0947167	0.92454	0.983424
Ltb	14473.1	0.0115851	0.120017	0.0965284	0.923101	0.983113
Nlrc5	14375.7	-0.00929164	0.104733	-0.0887172	0.929307	0.983964
Dync1h1	14335.5	0.0213724	0.121351	0.176121	0.860199	0.967743
Anp32b	14360.9	0.0453121	0.0520735	0.870157	0.384214	0.769045
Cd47	14325.9	-0.0722732	0.046687	-1.54804	0.121614	0.49497
Fnbp1	14285.6	-0.0968368	0.0713106	-1.35796	0.174477	0.574967
Vasp	14329.2	0.00373778	0.0505468	0.0739468	0.941053	0.98616
Mcl1	14266.5	-0.0155656	0.0636307	-0.244624	0.806747	0.953176
Stk17b	14232	-0.0731316	0.0614288	-1.19051	0.233846	0.644659
Trbc1	14187.5	0.211992	0.0420038	5.04697	4.48882e-07	6.08599e-05
Actn4	14184.5	0.00124168	0.0702328	0.0176795	0.985895	0.995956
Eif4g1	14102.4	-0.0214781	0.0739931	-0.290272	0.771608	0.943878
Arhgap9	14094.8	-0.056109	0.0794103	-0.706571	0.479833	0.827253
Tapbp	14116.9	0.117048	0.0876578	1.33529	0.181782	0.583161
Eif3h	14114.5	0.0418605	0.0806836	0.518823	0.603884	0.886382
Srsf1	14067.4	-0.0352978	0.0482274	-0.731903	0.464228	0.818487
Rps17	13911.2	0.176386	0.0958835	1.83959	0.0658285	0.361041
Polr2a	13771.2	-0.126663	0.110274	-1.14862	0.250712	0.662905
Arid1a	13725.1	-0.0259843	0.108959	-0.238478	0.81151	0.95516
Fam78a	13764.4	0.134628	0.0496598	2.71101	0.00670778	0.0966517
Hnrnph1	13686.9	0.0190312	0.0725253	0.262407	0.793008	0.950287
Sptan1	13687.9	-0.0822574	0.0894263	-0.919835	0.357659	0.74866
Lasp1	13716.9	-0.0848377	0.0728497	-1.16456	0.244198	0.655729
Calm3	13727.9	0.0432146	0.0820774	0.52651	0.598534	0.886091
Ptbp1	13698.3	-0.0763067	0.0830449	-0.918861	0.358168	0.749285
Hnrnpab	13718.4	-0.110986	0.0991458	-1.11942	0.262961	0.674393
Racgap1	13692	-0.0859239	0.0870973	-0.986528	0.323874	0.72341
Rpl30	13745.6	0.303865	0.120228	2.5274	0.0114909	0.134169
Rasa3	13571.3	-0.311734	0.152641	-2.04227	0.0411247	0.280427
Capzb	13643.5	0.0228409	0.0771365	0.29611	0.767146	0.942563
Dgkz	13576.9	-0.0301579	0.039597	-0.76162	0.446287	0.80853
Hnrnpf	13587.2	-0.117977	0.0797206	-1.47988	0.138904	0.524976
Sp100	13480.3	-0.106335	0.0615457	-1.72774	0.0840341	0.413661
Aldoa	13564	0.124578	0.0929691	1.34	0.180246	0.582655
Ccnd2	13477.7	0.194229	0.0490965	3.95607	7.61942e-05	0.00397326
Hcfc1	13436.6	-0.0529215	0.0904113	-0.585341	0.558318	0.868012
Ccni	13330.4	0.15398	0.0732423	2.10234	0.0355232	0.259072
Map4k2	13220.5	0.00704048	0.079891	0.0881261	0.929776	0.983964
Sash3	13269.1	-0.0144612	0.0641101	-0.225568	0.821538	0.957494
Zyx	13242.8	-0.241134	0.0798275	-3.02069	0.00252198	0.0496581
Lat	13226.8	0.0154777	0.0581122	0.266341	0.789976	0.949439
H2afx	13272	0.222647	0.105688	2.10664	0.0351487	0.257926
Sh3bgrl3	13198.4	-0.0410453	0.126023	-0.325698	0.744653	0.936518
Arpc5	13118.1	-0.125978	0.0696877	-1.80775	0.0706448	0.375963
Lbr	13093.3	-0.0356316	0.0660084	-0.539805	0.589332	0.880811
Sbf1	12970.1	0.0290561	0.0587792	0.494327	0.621075	0.890975
Kpnb1	12917.9	-0.0931651	0.0604594	-1.54095	0.123328	0.499346
Srebf2	12902.9	-0.140552	0.0679394	-2.06879	0.0385657	0.271389
Cd3e	12895.6	0.129092	0.0426068	3.02985	0.00244677	0.0484959
Klf13	12835.9	-0.0213478	0.0851184	-0.250801	0.801968	0.951428
Slc25a3	12872.3	0.0846659	0.0455493	1.85877	0.0630591	0.354546
Kmt2d	12694.9	0.0636476	0.272379	0.233673	0.815239	0.956512
Lnpep	12696.9	0.0342285	0.132933	0.257487	0.796803	0.950415
Calr	12776.2	-0.115836	0.0622531	-1.86072	0.0627834	0.353699
Ppp6r1	12755.7	0.0327275	0.0589845	0.554849	0.578998	0.877154
Ran	12739	-0.0742823	0.0846516	-0.877506	0.380212	0.76497
Nkg7	12680.7	-0.229339	0.074277	-3.08762	0.00201765	0.0428705
Anapc5	12674	0.0530282	0.0646771	0.81989	0.412279	0.790259
Set	12634.6	-0.00382769	0.07243	-0.0528468	0.957854	0.990649
Epsti1	12659.9	0.199253	0.140198	1.42122	0.155251	0.549904
Ptprcap	12631.9	-0.00693216	0.0939332	-0.0737988	0.94117	0.98616
Ankrd11	12520.7	-0.102024	0.108315	-0.941917	0.346235	0.740646
Rps27	12610.8	0.366546	0.112541	3.257	0.00112597	0.0283204
Tbc1d10c	12549.3	0.0727636	0.0460747	1.57925	0.114278	0.481035
Ezr	12562.2	-0.110594	0.0729957	-1.51508	0.129753	0.511087
Slc25a5	12586.1	0.0826104	0.0836869	0.987138	0.323575	0.723256
Btg1	12485.1	-0.338932	0.117324	-2.88885	0.00386654	0.0682083
Ddx39b	12509.5	0.0952224	0.0384369	2.47737	0.0132354	0.144937
Rpl36	12539.7	0.286839	0.0900441	3.18554	0.00144485	0.0339071
Pdia3	12492.3	-0.120528	0.0964723	-1.24935	0.211536	0.617221
Hnrnpm	12461.5	-0.0330481	0.0650087	-0.508364	0.611198	0.88804
Cd8b1	12387.8	-0.0305195	0.132359	-0.230582	0.81764	0.956608
Naca	12440.7	0.155486	0.0722217	2.1529	0.0313265	0.2429
Myl6	12425.6	-0.0359296	0.0834727	-0.430436	0.666879	0.909245
Hnrnpul2	12387.7	0.0248298	0.0528975	0.469395	0.638787	0.896623
S100a10	12391.9	-0.171747	0.139812	-1.22842	0.21929	0.628098
Rcc2	12371.8	0.0520426	0.0615527	0.845497	0.397833	0.780159
Smap2	12338.8	-0.129668	0.0495359	-2.61765	0.00885376	0.116168
Rbm39	12327	0.130168	0.0642877	2.02476	0.0428915	0.287073
Thrap3	12317.1	0.0482267	0.0820529	0.587752	0.556699	0.867222
Mlec	12305.2	0.0677635	0.0541579	1.25122	0.210853	0.615988
Atp1b3	12222.8	-0.239088	0.127704	-1.87221	0.0611778	0.349559
Fermt3	12215.5	-0.000995929	0.0625648	-0.0159184	0.9873	0.996096
Dock8	12169.5	0.0212198	0.054072	0.392436	0.694736	0.920542
Eif3a	12141	0.0315057	0.063447	0.496567	0.619494	0.890269
Nfkb1	12169.7	0.184713	0.0700561	2.63664	0.00837304	0.112029
Sf3b2	12048.3	0.0624474	0.0526354	1.18641	0.235459	0.646229
Cd3d	12056.1	0.068763	0.0931462	0.738227	0.460376	0.816688
Eif4h	11998.8	-0.0621133	0.0559202	-1.11075	0.266677	0.678808
Cntrl	11905.6	0.0608656	0.0825333	0.737467	0.460838	0.816836
Leng8	11865	0.164438	0.135331	1.21509	0.224334	0.632775
Gnb2	11892.2	-0.11026	0.0766772	-1.43798	0.150439	0.542124
Rasgrp2	11818.7	0.0980584	0.157431	0.622866	0.533372	0.856329
H2afz	11825.6	-0.140663	0.0844218	-1.66619	0.0956752	0.443034
Add1	11798.8	-0.0369923	0.0605804	-0.610632	0.541443	0.861644
Fxyd5	11812.4	0.0356235	0.0638914	0.557563	0.577143	0.876676
Ube2d3	11777.9	-0.0245093	0.0530523	-0.461984	0.644093	0.899569
Fus	11746.9	-0.0366473	0.0833164	-0.439858	0.66004	0.906741
Fam102a	11751.7	0.0158177	0.0653922	0.241889	0.808866	0.953704
Prkacb	11677.4	0.0374027	0.0540584	0.691895	0.489004	0.831098
Kcnab2	11684.7	-0.0871044	0.114321	-0.761928	0.446103	0.808479
Bcl2	11620.3	-0.127711	0.109867	-1.16241	0.24507	0.656532
Rpl39	11670.6	0.359667	0.102061	3.52403	0.000425029	0.0138658
Jpt1	11643.9	-0.12521	0.0932421	-1.34285	0.179321	0.581997
Dock10	11514.5	-0.157946	0.0863158	-1.82987	0.0672699	0.36628
Ubr4	11479.3	-0.0466823	0.133067	-0.350817	0.725726	0.932298
Cnot1	11482.5	-0.0782936	0.066759	-1.17278	0.240884	0.652441
Acin1	11467.2	0.0326618	0.0705866	0.462719	0.643565	0.899273
Rrm2	11499	-0.257756	0.0655125	-3.93446	8.33845e-05	0.00426502
Rpl37	11511	0.217552	0.0948392	2.2939	0.0217961	0.198106
Birc6	11367.2	-0.0996339	0.143567	-0.693987	0.487691	0.830673
Pclaf	11421.2	-0.289243	0.0771383	-3.74967	0.000177067	0.00743578
Dnm2	11352.4	-0.0181038	0.0555702	-0.325783	0.744589	0.936518
Rrm1	11392.5	-0.180348	0.0799195	-2.25663	0.0240315	0.208943
Stk4	11348.9	-0.101779	0.0532932	-1.90979	0.0561607	0.334168
mt-Rnr2	11292.2	0.171275	0.0583441	2.93559	0.0033291	0.0609164
Mllt6	11209.5	0.0472001	0.092574	0.509864	0.610147	0.88777
Inpp4b	11234.1	0.0239746	0.0766522	0.312771	0.754455	0.938923
Srsf3	11251	-0.142088	0.061818	-2.2985	0.0215335	0.196886
Srsf5	11213.1	0.176553	0.0630743	2.79913	0.00512403	0.0819614
Fam120a	11208.2	0.0162239	0.0521465	0.311122	0.755708	0.939093
Diaph1	11204.4	0.0818582	0.0558578	1.46547	0.142792	0.531389
Ncor1	11181	0.0782845	0.0851624	0.919237	0.357971	0.748983
Caprin1	11201.2	0.0107241	0.0488128	0.219698	0.826107	0.958303
Baz1b	11118.8	-0.106932	0.0725453	-1.474	0.140481	0.527063
Kif11	11149.7	-0.0635059	0.0777107	-0.817209	0.413809	0.79063
Ddb1	11145.2	0.0249949	0.0635012	0.393613	0.693867	0.920446
Brd2	11126.9	-0.0107442	0.0469457	-0.228865	0.818974	0.956608
Satb1	11135.8	0.115482	0.0910559	1.26825	0.204709	0.610952
Sept6	11139.1	0.146429	0.0616742	2.37423	0.0175854	0.172231
Kbtbd11	11060.8	0.00638552	0.101492	0.0629167	0.949833	0.988109
Pcna	11103	-0.159105	0.0807066	-1.9714	0.0486784	0.308965
Stk10	11057.2	0.0114827	0.0609039	0.188537	0.850455	0.965554
Bin2	11058.8	0.060549	0.0887129	0.682527	0.494906	0.833527
Ankrd44	11034.5	-0.0855839	0.0831328	-1.02949	0.303252	0.70941
Wipf1	11038.3	-0.0525568	0.044979	-1.16848	0.242615	0.654388
Apobec3	11006.7	-0.0834325	0.0862249	-0.967614	0.333237	0.730279
Srsf6	10968.5	-0.0246286	0.0528286	-0.466198	0.641074	0.897642
Rap1b	10964.6	-0.063206	0.0726179	-0.870391	0.384087	0.769045
Rinl	10909.2	0.0655585	0.048213	1.35977	0.173904	0.574698
Hsp90aa1	10930	-0.10758	0.0907134	-1.18593	0.235648	0.646375
Cdc25b	10921.5	-0.000808825	0.100752	-0.00802788	0.993595	0.99794
G3bp1	10897.7	-0.0139623	0.0654928	-0.213188	0.831181	0.959658
Tkt	10915	-0.027338	0.0889536	-0.307329	0.758593	0.939194
Slc44a2	10784.6	0.0186099	0.0665385	0.279686	0.779718	0.946862
Eif4ebp2	10775.5	0.00395356	0.0573091	0.0689865	0.945	0.987161
Celf2	10750.3	-0.0999667	0.0547359	-1.82635	0.0677983	0.367546
Hdgf	10790.4	-0.0513198	0.0845334	-0.607094	0.543788	0.862645
Ifngr1	10710.1	-0.0658138	0.0905423	-0.726884	0.467297	0.820039
Copa	10710.3	0.0214085	0.0478843	0.447088	0.654811	0.90464
Rpl35	10730.2	0.350478	0.0811421	4.31932	1.56513e-05	0.00116048
Zdhhc18	10649.8	0.110276	0.0660116	1.67056	0.0948085	0.441232
Jak3	10660.9	0.159957	0.0643391	2.48615	0.0129134	0.143175
Cdc42se1	10610.7	-0.0105202	0.0595869	-0.176551	0.859861	0.967513
Gimap6	10604.6	-0.167671	0.116412	-1.44032	0.149776	0.541735
Hsp90b1	10616	-0.172331	0.0759369	-2.2694	0.0232441	0.204894
Sptbn1	10562.8	-0.0924319	0.128714	-0.71812	0.472683	0.823399
Pdcd6ip	10574.3	-0.0297867	0.0454407	-0.655508	0.512141	0.843262
Cd3g	10556.4	0.0850509	0.103499	0.821757	0.411215	0.790181
Nckap1l	10506.6	0.0435128	0.0345033	1.26112	0.207266	0.613657
Fyn	10503.2	0.0280892	0.0419044	0.670318	0.502655	0.838701
Fth1	10528.2	0.0813358	0.105604	0.7702	0.441181	0.805142
Evl	10468.5	0.0931008	0.0682194	1.36473	0.172339	0.57296
Ccna2	10496.4	-0.0700704	0.0869028	-0.806308	0.420065	0.794049
Ehmt2	10491.8	0.255951	0.0566466	4.51837	6.2317e-06	0.000544261
Tecpr1	10417.2	-0.040284	0.0582388	-0.691704	0.489123	0.831098
Csnk1a1	10426.1	-0.0589465	0.0524369	-1.12414	0.260953	0.672956
Mta2	10378.7	-0.0642671	0.0467486	-1.37474	0.169213	0.569257
Srsf2	10355.4	-0.10653	0.0679304	-1.56823	0.116828	0.486557
Rac1	10355.4	-0.014333	0.0653314	-0.21939	0.826346	0.958303
Anp32e	10339.6	0.0193648	0.0640258	0.302453	0.762307	0.940725
Rbck1	10328	-0.000112967	0.0386251	-0.0029247	0.997666	0.99918
Dazap2	10331.7	-0.0940874	0.0737297	-1.27611	0.201916	0.607709
Cic	10212.4	0.0963815	0.0975275	0.98825	0.32303	0.722719
Ugcg	10190.7	-0.288577	0.058351	-4.94554	7.59348e-07	9.31903e-05
Gdi2	10214.6	-0.0382673	0.0648303	-0.590269	0.555011	0.866508
Luc7l2	10140.3	0.192325	0.156549	1.22852	0.219251	0.628098
Raly	10220.5	-0.0323169	0.0811811	-0.398084	0.690568	0.919036
Eif3c	10210.6	0.00724188	0.0625063	0.115859	0.907765	0.978746
Trim28	10207.7	0.0183591	0.0747717	0.245536	0.806041	0.95274
Incenp	10193.6	0.0075669	0.0692834	0.109217	0.913031	0.980217
Kpna2	10210.5	-0.154661	0.110357	-1.40147	0.161075	0.558195
Myo1f	10133.6	-0.148773	0.0836355	-1.77883	0.0752674	0.389214
Ptbp3	10127.4	-0.110871	0.0614034	-1.80563	0.0709769	0.376678
Pcbp1	10144.2	0.0178074	0.0811867	0.219339	0.826386	0.958303
Mcm5	10141.6	-0.0666745	0.0843609	-0.790349	0.429324	0.798981
Ctsd	10095.6	-0.364722	0.0996024	-3.66178	0.000250472	0.00971965
Smg1	10004.2	-0.0042256	0.156016	-0.0270844	0.978392	0.99451
Glipr2	10064.7	-0.12769	0.0694347	-1.839	0.0659154	0.36119
Cnbp	10077.3	-0.0305446	0.0772292	-0.395506	0.692469	0.919722
Srrt	10040	-0.0247153	0.070397	-0.351084	0.725525	0.932182
Neat1	10014.7	0.241877	0.115314	2.09756	0.0359444	0.260409
Mob1a	10034.9	-0.0623643	0.0507424	-1.22904	0.219058	0.628098
Rasgrp1	9998.38	0.0224529	0.0616631	0.364122	0.715767	0.928435
Vsir	10002.8	0.0284759	0.0622606	0.457367	0.647408	0.901545
Mcm6	9970.91	-0.125351	0.0737134	-1.70052	0.0890332	0.426472
Mycbp2	9906.02	0.157332	0.126943	1.2394	0.215199	0.622298
Edem1	9917.52	0.036245	0.0634217	0.571492	0.567666	0.873748
Aak1	9864.79	0.0311982	0.0917365	0.340085	0.733793	0.934325
Nsd3	9849.15	-0.0795971	0.0880855	-0.903634	0.366189	0.756092
Rhoa	9888.99	-0.053603	0.0670037	-0.800002	0.42371	0.795635
Pgk1	9910.66	0.0286715	0.0888903	0.322549	0.747037	0.936706
Ptp4a2	9872.44	0.0508666	0.0575085	0.884505	0.376424	0.761946
Nisch	9803.03	0.22305	0.118182	1.88734	0.0591147	0.344055
Ankrd13a	9854.22	0.0404378	0.0570105	0.709304	0.478136	0.827253
Rpl22	9864.4	0.270023	0.0754704	3.57787	0.000346402	0.0118543
Nap1l1	9838.75	0.0932403	0.0551125	1.69182	0.0906807	0.431749
Ywhah	9844.41	-0.0411381	0.082536	-0.498425	0.618184	0.890042
Uhrf1	9836.61	-0.102897	0.0902831	-1.13972	0.254405	0.666981
Fkbp8	9810.01	-0.0230673	0.0669196	-0.344702	0.730319	0.933252
Hmgn2	9828.79	-0.151739	0.0998754	-1.51929	0.12869	0.509666
Tpr	9765.65	-0.161289	0.0830533	-1.94199	0.0521378	0.32061
Madd	9757.21	-0.0273378	0.078789	-0.346975	0.72861	0.932536
Cd164	9759.64	-0.0698576	0.0613406	-1.13885	0.254766	0.667208
Dek	9731.58	-0.0492037	0.0649237	-0.75787	0.448529	0.810414
Snrnp200	9722.45	0.0169543	0.0733141	0.231256	0.817116	0.956608
Fasn	9694.47	-0.170614	0.127778	-1.33524	0.181798	0.583161
Btf3	9700.59	0.0592093	0.070844	0.83577	0.403284	0.78399
Psd4	9659.04	0.0217266	0.0636313	0.341445	0.732769	0.934215
Myo9b	9596.85	-0.0531383	0.0665662	-0.798277	0.42471	0.796702
Sh3kbp1	9604.43	-0.104146	0.0549472	-1.89538	0.0580427	0.34074
Capza1	9597.29	-0.0923865	0.0639453	-1.44477	0.148522	0.539651
Tab2	9572.3	-0.0736172	0.0847183	-0.868964	0.384867	0.76938
Larp1	9539.55	-0.089075	0.0986113	-0.903294	0.36637	0.756219
Ctbp1	9601.62	0.0906449	0.0802721	1.12922	0.258805	0.670856
Ppp2r5a	9571.26	-0.00279626	0.0872807	-0.0320375	0.974442	0.99385
Csk	9568.95	-0.00542054	0.063462	-0.0854139	0.931932	0.984198
Sipa1	9556.34	0.0109368	0.0557673	0.196115	0.84452	0.964042
Slc9a3r1	9556.85	-0.0380946	0.0754114	-0.505156	0.613449	0.889438
Hcls1	9552.85	0.0407188	0.0786436	0.517764	0.604623	0.886641
2610507B11Rik	9501.59	-0.0489318	0.0635253	-0.770272	0.441138	0.805142
Ccdc88b	9519.59	0.119827	0.0481159	2.49039	0.0127605	0.142365
Acly	9526.24	-0.0171915	0.0658997	-0.260873	0.79419	0.950287
Ccnd3	9528.5	0.0213067	0.0797971	0.267011	0.78946	0.949415
Cct2	9507.18	0.042257	0.0606349	0.696909	0.48586	0.82954
Psmb8	9513.86	0.00622207	0.103485	0.0601254	0.952056	0.988896
Rpl7a	9496.81	0.415383	0.235167	1.76633	0.0773411	0.394917
Itgae	9453.24	0.21297	0.130489	1.63209	0.10266	0.455868
Ldb1	9446.45	0.169235	0.060147	2.81369	0.00489763	0.0794108
Fam168b	9416.32	0.0160377	0.0443571	0.361559	0.717682	0.929132
Kmt2a	9346.96	0.0941507	0.176149	0.534493	0.593	0.883049
Tcf25	9401.92	0.06733	0.0533721	1.26152	0.207122	0.613411
Ppp2r5c	9414.41	0.0209582	0.0535346	0.39149	0.695435	0.920851
Pitpnm1	9393.77	0.338927	0.0678026	4.99873	5.77098e-07	7.35801e-05
Map4k4	9366.7	0.00908289	0.0779867	0.116467	0.907282	0.978746
Efhd2	9393.22	-0.121474	0.0914494	-1.32832	0.184072	0.585836
Nfatc3	9368.34	0.000580201	0.0565053	0.0102681	0.991807	0.997293
Ddx3x	9346.55	0.0938201	0.063616	1.47479	0.14027	0.527021
Ppp1r9b	9316.49	-0.0281142	0.0863732	-0.325496	0.744805	0.936518
Crip1	9334.01	-0.267706	0.105532	-2.53673	0.0111892	0.132277
Rnf213	9256.09	-0.114248	0.126072	-0.906207	0.364826	0.755204
Ppp1cc	9301.64	-0.0996004	0.0529191	-1.88213	0.0598189	0.346312
Khsrp	9299.08	0.0393144	0.0710376	0.553432	0.579968	0.877431
Fcho1	9292.38	0.0582348	0.0433875	1.3422	0.17953	0.581997
Ep400	9237.05	-0.0116135	0.132165	-0.0878714	0.929979	0.983964
Prkch	9272.03	-0.205992	0.0451625	-4.56113	5.088e-06	0.000470342
Ssrp1	9295.37	0.0094521	0.0594852	0.158899	0.873749	0.971662
Il2rg	9251.21	-0.0986786	0.0429457	-2.29775	0.0215759	0.197058
Capn1	9249.97	0.00605042	0.0603361	0.100279	0.920123	0.981708
Rpa1	9235.99	-0.0507019	0.0693192	-0.731427	0.464519	0.818487
Pds5a	9191.39	-0.0628604	0.0857606	-0.732975	0.463574	0.818404
Sorl1	9196.65	0.189911	0.0896286	2.11886	0.034102	0.25391
Cenpa	9173.91	-0.0530783	0.0692866	-0.766069	0.443635	0.806737
Nucks1	9165.11	0.0145029	0.0700532	0.207027	0.835989	0.96172
Tardbp	9144.58	0.0207333	0.0671455	0.308782	0.757487	0.939194
Bag6	9145.82	0.0566994	0.0464219	1.22139	0.221937	0.631016
Smc1a	9119.4	-0.0470372	0.0655198	-0.717908	0.472814	0.823399
Prelid1	9113.86	-0.0595029	0.106336	-0.559573	0.575771	0.8759
Hspa5	9073.03	-0.200921	0.0793835	-2.53102	0.0113731	0.133587
Hipk1	8997.44	-0.124837	0.0756919	-1.64928	0.09909	0.448797
Wdr82	8999.95	-0.188637	0.0612806	-3.07825	0.00208219	0.0438506
Khdrbs1	9018.46	0.0788292	0.0485836	1.62255	0.104686	0.46154
Pde3b	8998.25	-0.0132185	0.056901	-0.232307	0.816299	0.956526
Nlrc3	8963.73	-0.000343342	0.0970225	-0.00353879	0.997176	0.999142
Rps6ka1	9002.69	0.00562414	0.0726219	0.0774441	0.93827	0.985907
Trip12	8961.24	-0.0666667	0.0605999	-1.10011	0.271283	0.683175
Ly6a	9054.45	0.303942	0.255184	1.19107	0.233626	0.644555
Zap70	8976.39	-0.00700992	0.0671448	-0.1044	0.916852	0.9813
Gnb1	8966.51	-0.0292462	0.0719731	-0.406349	0.684486	0.916253
Trbv12-1	8971.17	-0.334856	0.309031	-1.08357	0.278557	0.688881
Topbp1	8926.54	0.00501938	0.059307	0.0846338	0.932553	0.984488
Tcf3	8914.65	-0.0164993	0.0557612	-0.295892	0.767312	0.942563
Glud1	8903.85	-0.0975014	0.0534982	-1.82252	0.0683769	0.369137
Stk38	8832.43	-0.143468	0.134838	-1.064	0.28733	0.696598
Ppp1r18	8873.21	0.00202666	0.0495376	0.0409116	0.967366	0.992822
Cct5	8886.74	0.00941973	0.0809745	0.11633	0.907391	0.978746
B4galt1	8846.35	-0.0509183	0.04371	-1.16491	0.244055	0.655663
Akt1	8852.91	-0.0390525	0.053147	-0.734802	0.46246	0.817972
Cxcr6	8870.29	-0.177488	0.249178	-0.712292	0.476284	0.825489
Arf6	8846.49	-0.0686991	0.0930093	-0.738626	0.460134	0.81662
Ubtf	8818.92	0.0580677	0.0369229	1.57267	0.115795	0.483702
Vcp	8831.91	-0.0222149	0.0842632	-0.263637	0.79206	0.950272
Ywhae	8817.35	-0.0155903	0.0710116	-0.219546	0.826225	0.958303
Pcbp2	8821.54	0.177389	0.0519026	3.41773	0.000631454	0.0185348
Cd53	8798.86	-0.122379	0.0685682	-1.78478	0.0742969	0.387074
Cdc37	8803.35	0.0586239	0.0560398	1.04611	0.295509	0.701378
Cltc	8776.5	-0.123078	0.0658266	-1.86974	0.0615205	0.350517
Mcm7	8797.85	-0.0777673	0.0743748	-1.04561	0.295739	0.701457
Eif3e	8770.88	0.093706	0.0691673	1.35477	0.17549	0.576406
Atp11b	8722.98	0.0462531	0.121222	0.381556	0.70279	0.923476
Cyth4	8738.8	-0.0260912	0.0664246	-0.392793	0.694472	0.920446
Elf4	8710.21	-0.0342828	0.0781194	-0.438852	0.660769	0.907214
E2f2	8722.36	-0.115671	0.112733	-1.02607	0.30486	0.710688
Dhx9	8704.39	-0.152982	0.0863091	-1.77249	0.076313	0.391775
Fyb	8698.31	0.20854	0.0641699	3.2498	0.00115486	0.0287635
Cds2	8660.59	0.158269	0.0793001	1.99582	0.0459538	0.298857
Jund	8677.59	-0.148083	0.0728704	-2.03214	0.0421399	0.284045
Gramd3	8657.62	-0.108579	0.0541941	-2.00352	0.0451211	0.295863
Surf4	8636.83	-0.0143491	0.0788459	-0.181989	0.855591	0.966817
Dennd1c	8577.13	0.0941966	0.101812	0.925201	0.354862	0.746751
Ube2i	8606.63	0.0503224	0.0479839	1.04873	0.2943	0.700807
Dcaf7	8606.17	0.0368271	0.0571068	0.644881	0.519004	0.847071
Rassf5	8598.33	-0.046771	0.0482913	-0.968519	0.332785	0.730199
Igtp	8541.85	-0.10862	0.250661	-0.433334	0.664772	0.909245
Sell	8510.38	-0.137711	0.334581	-0.411592	0.680638	0.914378
Atrx	8505.27	0.0407576	0.130468	0.312395	0.75474	0.939021
Csnk1g2	8560.04	-0.0741486	0.0735385	-1.0083	0.313312	0.716796
Elf1	8507.2	-0.102123	0.0517934	-1.97173	0.0486405	0.308965
Lrp10	8527.54	0.0502695	0.0750961	0.669402	0.503239	0.838988
Tuba1c	8546.61	-0.135334	0.105218	-1.28623	0.198362	0.602621
Cish	8519.43	0.231356	0.0886034	2.61115	0.00902394	0.116786
Hectd1	8472.01	-0.123222	0.0842965	-1.46177	0.143805	0.532989
Gabpb2	8463.26	0.0586312	0.110892	0.528722	0.596999	0.88493
Frmd8	8501.17	-0.0954757	0.061581	-1.55041	0.121043	0.494313
U2af2	8485.48	-0.0382257	0.0599102	-0.638049	0.523442	0.850217
Bzw1	8481.73	-0.113384	0.064819	-1.74924	0.080249	0.403253
Arf1	8471.43	-0.0382655	0.0722155	-0.52988	0.596195	0.884441
Mgea5	8418.69	-0.103246	0.0745132	-1.38561	0.165865	0.5654
Cox4i1	8442.7	0.0200355	0.0922881	0.217097	0.828133	0.958505
Mast3	8398.69	0.12041	0.0662808	1.81666	0.0692685	0.371555
Rpl35a	8436.04	0.279771	0.0864608	3.23581	0.00121297	0.0297208
Rangap1	8417.54	-0.00964713	0.0656073	-0.147043	0.883098	0.974386
Wasf2	8370.52	-0.0518832	0.0790381	-0.656433	0.511546	0.843063
Arhgap4	8375.39	0.105407	0.0373303	2.82364	0.0047481	0.0782338
Emb	8378.44	-0.113877	0.0863012	-1.31952	0.186994	0.58965
Zmiz2	8359.86	0.0726433	0.0532924	1.36311	0.172849	0.573719
Tpm4	8351.46	-0.190528	0.0822601	-2.31616	0.0205496	0.190709
Rps29	8373.34	0.48093	0.086385	5.56729	2.58729e-08	5.04558e-06
Sidt2	8321.73	0.00227702	0.0525301	0.043347	0.965425	0.992524
Ncaph2	8355.99	-0.0482361	0.0834183	-0.578244	0.5631	0.870862
Ptpa	8344.26	-0.0226942	0.0655671	-0.346123	0.729251	0.933179
Smarcc2	8301.39	0.0435043	0.0594222	0.732122	0.464094	0.818487
Cox7a2l	8307.25	0.105803	0.0750237	1.41026	0.158462	0.554675
Rps10-ps2	8281.14	0.177244	0.0877477	2.01993	0.0433904	0.289193
Flii	8258.33	0.0484392	0.0583492	0.830161	0.406448	0.786676
CT010467.1	8309.12	0.417593	0.277651	1.50402	0.132576	0.515106
Srrm1	8228.01	0.116554	0.0799974	1.45697	0.145125	0.535094
S100a6	8261.61	-0.280533	0.132863	-2.11144	0.0347342	0.256338
Spata13	8206.91	-0.18942	0.0575015	-3.29418	0.000987097	0.0256898
Eif4a2	8219.93	0.0844382	0.0570588	1.47985	0.138914	0.524976
Plcg1	8210.81	0.157634	0.0693893	2.27173	0.0231027	0.204534
Sh2d3c	8229.48	-0.067035	0.058194	-1.15192	0.249352	0.6622
Fryl	8154.55	-0.315386	0.124522	-2.53277	0.0113166	0.133144
Smarca4	8207.25	-0.0751294	0.0738717	-1.01702	0.309142	0.713733
P4hb	8227.4	-0.0437704	0.0676567	-0.646948	0.517665	0.846385
Psme1	8200.8	0.0964116	0.0947866	1.01714	0.309085	0.713733
Gbp4	8125.38	-0.124546	0.140195	-0.88838	0.374337	0.761114
Srsf11	8114.89	-0.0180547	0.101805	-0.177346	0.859237	0.967346
Rapgef6	8120.79	-0.107809	0.0817177	-1.31929	0.187073	0.58965
Slc38a1	8130.29	-0.0937312	0.0759983	-1.23333	0.217451	0.625776
Hnrnpd	8135.07	-0.0062039	0.0583866	-0.106256	0.91538	0.981054
Baz2a	8061.15	0.0697699	0.108596	0.642475	0.520565	0.848107
Agap2	8088.49	0.031098	0.0596153	0.521645	0.601918	0.886162
Prkd2	8085.06	-0.0460779	0.0490162	-0.940054	0.34719	0.741346
Ckap5	8104.02	-0.0375363	0.0788049	-0.476319	0.633847	0.895498
Clta	8111.4	0.00748576	0.104201	0.0718397	0.942729	0.986767
Mtpn	8076.54	-0.0228681	0.0582008	-0.392916	0.694381	0.920446
Rbbp4	8077.37	-0.0505204	0.0600796	-0.840892	0.400408	0.781814
Pak2	8050.05	0.0162263	0.0426809	0.380177	0.703814	0.923541
Gtf2i	8056.25	0.0849399	0.038123	2.22805	0.0258773	0.217829
Canx	8053.26	-0.1084	0.0655199	-1.65445	0.0980358	0.446901
Mdm4	7984.84	0.0366049	0.149606	0.244675	0.806708	0.953176
Cs	8056.78	0.100689	0.0553419	1.8194	0.0688504	0.370572
Ifi47	8014.11	-0.0677048	0.141607	-0.478119	0.632566	0.895379
Atp8b4	7976.87	-0.388976	0.0605486	-6.42419	1.32572e-10	4.71825e-08
Map4	8001.78	-0.0268318	0.049076	-0.54674	0.584557	0.879393
Slc1a5	7986.6	-0.149769	0.0557393	-2.68695	0.00721073	0.100936
Tpx2	8024.61	-0.0702306	0.0906777	-0.774509	0.43863	0.803344
Xpo1	7982.29	-0.147363	0.0731799	-2.01372	0.0440394	0.292171
Nsd2	7998.56	-0.0567371	0.0785683	-0.722138	0.47021	0.822077
Sec24c	7974.47	0.0276735	0.0466441	0.593291	0.552987	0.865369
Sdf4	7980.52	-0.00265026	0.0568396	-0.0466271	0.96281	0.991699
Os9	7991.55	0.152729	0.0630088	2.42393	0.0153535	0.158668
Bcl11b	7958.58	-0.0286607	0.0604109	-0.474428	0.635194	0.895498
Akr1a1	7993.03	0.0280475	0.0905517	0.30974	0.756759	0.939114
Brd4	7932.38	0.0430124	0.109354	0.393331	0.694075	0.920446
Add3	7951.6	-0.116202	0.108225	-1.07371	0.282952	0.693305
Odc1	7959.7	0.149654	0.0773572	1.93458	0.0530417	0.323939
Cbl	7881.51	0.0492054	0.154188	0.319127	0.749631	0.936857
Hnrnpc	7925.48	-0.0031955	0.0619297	-0.0515989	0.958848	0.990883
Chtop	7912.87	0.0779244	0.0479781	1.62417	0.10434	0.460666
Ostf1	7904.71	-0.106352	0.0680879	-1.56198	0.118292	0.488543
Coro1b	7902.35	0.104632	0.0694421	1.50675	0.131874	0.513781
Skap1	7907.66	0.165681	0.0705275	2.34916	0.0188157	0.179772
Pum2	7877.96	0.0473892	0.050793	0.932986	0.350827	0.74335
Mark2	7859.5	-0.0484262	0.053249	-0.909429	0.363124	0.753605
Eif3b	7875.85	-0.0601567	0.0788859	-0.762578	0.445715	0.808029
Smc2	7867.56	-0.142626	0.0745863	-1.91223	0.0558461	0.333344
Pfkp	7828.45	0.0706637	0.0740556	0.954198	0.339984	0.73649
Setx	7794.07	-0.11418	0.116824	-0.977365	0.328388	0.726859
Cd37	7838.53	0.0617398	0.0765758	0.806257	0.420095	0.794049
Cdc20	7872.49	-0.0333559	0.121598	-0.274314	0.783844	0.948071
Ctnnb1	7837.68	-0.0914128	0.07293	-1.25343	0.210049	0.615956
Ago2	7782.49	0.100031	0.134284	0.744922	0.456319	0.814721
Znrf2	7803.49	-0.027479	0.0653938	-0.420207	0.674334	0.912617
Cnp	7775.51	-0.217511	0.0605947	-3.58961	0.000331169	0.0116121
Mapk1	7774.64	-0.0475335	0.0471691	-1.00773	0.313586	0.716796
Arrb2	7753.4	0.0080382	0.0461307	0.174248	0.86167	0.967832
Espl1	7741.5	-0.106304	0.0881474	-1.20598	0.227823	0.636564
Pik3r5	7691.19	-0.34356	0.0936879	-3.66707	0.000245345	0.00962185
Ptpn22	7723.07	-0.0347705	0.0604948	-0.574768	0.565448	0.872381
Cbx5	7718.54	-0.0462234	0.0724157	-0.638306	0.523274	0.850217
Cxcr3	7730.44	0.00260752	0.103589	0.0251717	0.979918	0.99512
Trac	7710.61	-0.234711	0.0796737	-2.9459	0.00322019	0.0593933
Ywhab	7707.65	-0.102924	0.0544478	-1.89033	0.058714	0.343653
Smarcd2	7716.87	0.0606468	0.0631687	0.960077	0.337017	0.733379
Man2b1	7682.62	-0.107821	0.0432113	-2.49521	0.0125882	0.141777
Ppp1r12a	7676.71	0.0227038	0.0644294	0.352383	0.724551	0.932015
Slfn2	7694.8	-0.0303075	0.11214	-0.270266	0.786956	0.948933
Ctcf	7680.56	0.0494308	0.0573367	0.862115	0.388624	0.773049
Trpc4ap	7671.02	-0.0493251	0.0725804	-0.679592	0.496763	0.83474
Rpl17-ps3	7687.75	0.249745	0.100188	2.49276	0.0126754	0.141973
Sdha	7671.77	0.0506826	0.0537813	0.942384	0.345996	0.740431
Padi2	7718.35	0.44341	0.123788	3.58202	0.000340948	0.0117809
Ube2c	7680.09	-0.0375406	0.110865	-0.338614	0.7349	0.934463
Gtpbp2	7629.89	0.138428	0.0932881	1.48388	0.137841	0.52374
Sh2d2a	7642.4	-0.0313165	0.058896	-0.531726	0.594916	0.883765
Ddx21	7631.32	-0.0450838	0.0847945	-0.531684	0.594945	0.883765
Atp8b2	7605.37	-0.197223	0.082718	-2.38429	0.0171122	0.168939
Nxf1	7603.48	-0.0478917	0.053245	-0.89946	0.368407	0.757638
Sesn3	7609.85	0.215558	0.0798922	2.69811	0.00697348	0.098693
Trrap	7565.78	-0.0149745	0.132947	-0.112635	0.91032	0.979762
Ubap2l	7588.96	-0.0155345	0.059279	-0.262058	0.793277	0.950287
Gimap1	7608.47	0.138356	0.0859382	1.60995	0.107409	0.46675
Mcm3	7603.39	-0.0899291	0.0876614	-1.02587	0.304953	0.710688
Ccnl2	7551.29	0.11326	0.0726936	1.55805	0.119223	0.490183
Ripor2	7509.19	-0.217622	0.165156	-1.31767	0.187613	0.58965
Prkcq	7502.39	-0.224464	0.0624924	-3.59187	0.000328314	0.0115674
Foxm1	7526.29	0.0963092	0.078401	1.22842	0.219291	0.628098
Eif1	7514.51	0.131355	0.0769126	1.70784	0.0876653	0.423228
Wdr26	7478.66	-0.0554635	0.0801808	-0.69173	0.489107	0.831098
Calm2	7502.9	-0.120599	0.09233	-1.30617	0.191494	0.595091
Traf1	7492.66	0.111125	0.11037	1.00684	0.314011	0.716847
Klf2	7455.27	-0.334915	0.330029	-1.0148	0.310199	0.714973
Rps21	7488.97	0.492668	0.10327	4.77067	1.8361e-06	0.000205222
Cenpf	7454.61	-0.0530604	0.106867	-0.496511	0.619534	0.890269
Sf3b3	7438.32	-0.0768442	0.0696142	-1.10386	0.269655	0.681969
Cct4	7452.24	0.116467	0.0696986	1.67101	0.0947194	0.441232
Cbfb	7439.05	-0.105426	0.0613766	-1.7177	0.0858522	0.418989
AI506816	7406.46	-0.282505	0.116341	-2.42825	0.0151718	0.157554
Rab8b	7423.02	0.0325151	0.0588041	0.55294	0.580304	0.877539
Supt5	7412.09	0.011238	0.0487347	0.230595	0.81763	0.956608
Gm9794	7438.98	0.358384	0.0783735	4.57276	4.81331e-06	0.000450805
Rnf187	7428.12	0.0571834	0.0784273	0.729126	0.465925	0.81918
Mef2d	7373.09	0.0218421	0.0989799	0.220672	0.825348	0.958281
Zfp207	7373.65	-0.0143797	0.0654631	-0.219662	0.826134	0.958303
Lrrfip1	7378.86	-0.0525608	0.0570716	-0.920962	0.35707	0.748078
AW112010	7397.09	0.00901561	0.248171	0.0363282	0.971021	0.993045
Med12	7360.12	0.0981736	0.0948164	1.03541	0.300479	0.707395
Tgfbr2	7382.07	-0.0274568	0.0699912	-0.392289	0.694844	0.920542
Dhx15	7360.04	-0.0870655	0.0613792	-1.41849	0.156049	0.550424
Ttc7	7378.76	-0.0657183	0.0643894	-1.02064	0.307426	0.712897
Prr13	7357.89	-0.1457	0.107226	-1.35881	0.174206	0.574894
Il17ra	7327.02	-0.2531	0.0942542	-2.68529	0.00724667	0.101141
Id2	7363.36	-0.181562	0.259558	-0.699503	0.484238	0.828612
Ganab	7333.51	-0.0848515	0.0465523	-1.82271	0.0683471	0.369116
Rpl36a	7357.02	0.31375	0.0853238	3.67716	0.000235843	0.00943109
Ikbkb	7301.26	0.0727332	0.106756	0.681305	0.495678	0.834
Csde1	7310.19	0.0701218	0.0643698	1.08936	0.275996	0.686873
Capns1	7328.49	-0.0447526	0.0942704	-0.474725	0.634983	0.895498
Mcm4	7309.5	-0.14003	0.0645956	-2.16779	0.0301744	0.238313
Eif3l	7307.05	-0.00288434	0.0671763	-0.0429369	0.965752	0.992524
Nucb1	7309.16	-0.00971542	0.0834408	-0.116435	0.907308	0.978746
Carmil2	7276.64	0.123391	0.0654085	1.88647	0.0592323	0.344176
Tm9sf3	7277.77	-0.0257647	0.0456575	-0.564304	0.572548	0.875271
Usp19	7275.65	0.0272869	0.0438363	0.622473	0.533631	0.856329
Trp53inp1	7241.57	-0.163944	0.0589474	-2.78119	0.00541593	0.0845451
Ccnb2	7297.63	0.0501915	0.114768	0.437329	0.661873	0.907486
Unc13d	7260.57	0.0672536	0.0581675	1.1562	0.247597	0.660198
Ptpn6	7255.14	-0.211264	0.0895016	-2.36045	0.0182526	0.176405
Pdcd4	7237.99	-0.0508487	0.0565784	-0.89873	0.368796	0.757659
Rpn2	7247.66	-0.0298747	0.0722629	-0.413417	0.679301	0.914078
Myc	7234.21	0.140675	0.0909242	1.54717	0.121823	0.495505
Ifnar1	7204.55	-0.0523737	0.0666608	-0.785674	0.432058	0.800976
Rapgef1	7213.34	0.0248359	0.047318	0.524873	0.599671	0.886091
Psmd2	7219.81	-0.0227596	0.0646438	-0.352077	0.724781	0.932015
Nfatc1	7183.37	-0.136983	0.0537647	-2.54783	0.0108397	0.129675
Scd2	7157.8	-0.235459	0.11425	-2.06091	0.0393118	0.274091
Ppm1g	7157.68	-0.080233	0.0499191	-1.60726	0.107997	0.467877
Ptpn7	7146.02	-0.136598	0.0600396	-2.27514	0.0228977	0.203478
Srpk1	7111.97	0.0805481	0.0616943	1.3056	0.191689	0.595159
Nin	7084.65	-0.0932901	0.100158	-0.931434	0.351629	0.743852
Ccdc88c	7066.15	-0.000357584	0.124337	-0.00287593	0.997705	0.99918
Clint1	7090.59	-0.121562	0.0581121	-2.09186	0.0364513	0.262081
Npc2	7096.84	0.123886	0.0677351	1.82898	0.067403	0.366467
Arhgap11a	7067.68	-0.082877	0.0762889	-1.08636	0.277321	0.687987
Zc3h4	7066.8	-0.047895	0.0750362	-0.638292	0.523284	0.850217
Slc20a1	7030.06	0.00958573	0.0868387	0.110386	0.912104	0.980217
Lcp2	7059.08	-0.191368	0.075328	-2.54046	0.0110707	0.131555
Ivns1abp	7039.69	0.0831146	0.0636622	1.30556	0.191704	0.595159
Hnrnpdl	7038.47	-0.00217853	0.0519038	-0.0419725	0.966521	0.992762
Eif5	7023.06	0.0399487	0.0605304	0.659977	0.509269	0.841587
Ap2b1	7009.32	0.0913426	0.0488852	1.86851	0.0616909	0.351028
Ddx46	6980.73	-0.0417704	0.0668517	-0.624822	0.532088	0.855683
Arf5	6991.54	-0.146876	0.0944855	-1.55448	0.12007	0.492031
Tsc22d4	6979.94	0.0229672	0.0645717	0.355686	0.722076	0.931449
Nsd1	6954.79	0.192478	0.104408	1.84353	0.0652523	0.359289
Smchd1	6925.26	-0.0984874	0.0852503	-1.15527	0.247979	0.660719
Rps6ka3	6930.51	0.0835835	0.0614325	1.36057	0.173648	0.574698
Txn1	6967.11	-0.0361574	0.122613	-0.294891	0.768077	0.942563
Arhgef18	6894.96	-0.101866	0.127186	-0.800917	0.42318	0.795635
Cab39	6929.81	-0.00214111	0.0613142	-0.0349203	0.972143	0.993045
Hip1r	6900	-0.0717519	0.0601664	-1.19256	0.233043	0.643568
Ifi209	6906.92	0.0677215	0.0832726	0.813251	0.416074	0.791664
Lig1	6896.29	-0.108499	0.0642185	-1.68952	0.0911194	0.432969
Ifi203	6843.55	-0.243592	0.0907612	-2.68388	0.00727737	0.10147
Gzmb	6887.52	-0.350487	0.345158	-1.01544	0.309897	0.71456
Runx3	6841.31	0.0848583	0.113839	0.745424	0.456016	0.814721
Ap2m1	6880.2	0.0165606	0.0854626	0.193776	0.846351	0.964201
Rps28	6865.9	0.419604	0.0854097	4.91284	8.97652e-07	0.000108296
Ube2h	6828.58	-0.180694	0.069021	-2.61795	0.00884595	0.116168
Snrpb	6855.74	-0.0665106	0.0959624	-0.693091	0.488253	0.831034
Dennd4a	6817.53	-0.04924	0.0641666	-0.767376	0.442858	0.806411
H3f3a	6844.18	-0.110738	0.0878338	-1.26077	0.207393	0.613657
Helz2	6798.15	-0.151691	0.0959865	-1.58034	0.11403	0.480701
Acsl5	6843.09	-0.0201516	0.0847207	-0.237859	0.81199	0.955304
Tcp1	6823.33	-0.0471465	0.0705036	-0.66871	0.50368	0.839024
Nusap1	6827.52	-0.116218	0.0872873	-1.33144	0.183044	0.584714
Themis	6809.58	0.0986153	0.0714777	1.37967	0.16769	0.566975
Cyba	6813.42	-0.180594	0.0936935	-1.92749	0.0539184	0.327021
Fnbp4	6782.62	0.0932299	0.0819905	1.13708	0.255505	0.667452
Lrrc8c	6782.76	-0.169575	0.0752777	-2.25266	0.0242807	0.210256
Sp110	6774.11	0.0651907	0.0782217	0.83341	0.404614	0.78511
AU020206	6738.16	-0.196638	0.131988	-1.48982	0.136273	0.521499
Utrn	6739.12	0.06717	0.143998	0.466463	0.640884	0.897642
Cdkn2c	6759.49	-0.10116	0.0941453	-1.0745	0.282597	0.69298
Rbbp7	6745.69	-0.0595702	0.0794684	-0.749609	0.45349	0.813494
Stag2	6709.63	-0.0324915	0.0612811	-0.530204	0.595971	0.884235
Gatad2a	6708.36	-0.0460497	0.0386909	-1.1902	0.23397	0.644659
Psmb9	6727.58	0.153847	0.121281	1.26852	0.204614	0.610795
Bptf	6675.04	-0.00685894	0.105891	-0.0647738	0.948354	0.987982
Birc5	6704.09	-0.067091	0.0784482	-0.855227	0.392426	0.776285
Atp5d	6706.19	-0.00667392	0.0890024	-0.0749858	0.940226	0.98616
4932438A13Rik	6640.73	-0.0223448	0.150881	-0.148096	0.882267	0.974386
Parvg	6695.52	0.0598969	0.0753488	0.794927	0.426656	0.798351
Ikzf3	6649.14	-0.310901	0.0831279	-3.74002	0.000184002	0.00765923
Etnk1	6663.07	-0.0250535	0.0656917	-0.38138	0.702921	0.923476
Ppp2ca	6673.31	-0.0392039	0.0873655	-0.448734	0.653623	0.904397
S1pr4	6660.52	-0.170348	0.0951351	-1.79059	0.0733591	0.384514
Rpl17-ps10	6615.83	-0.0575642	0.24388	-0.236035	0.813405	0.955652
Dock11	6612.73	-0.107529	0.0779104	-1.38017	0.167535	0.566975
1700017B05Rik	6626.06	-0.270621	0.0852034	-3.17617	0.00149232	0.0344345
Itpr3	6600.89	0.0494456	0.0938824	0.526676	0.598419	0.886091
Arf3	6593.68	0.0116177	0.0812936	0.142911	0.886361	0.974662
Mndal	6558.51	-0.122843	0.0978857	-1.25496	0.209492	0.615612
Gna13	6587.96	0.0191195	0.0509104	0.375552	0.70725	0.925256
Arid5a	6583.56	-0.00199728	0.0553365	-0.0360933	0.971208	0.993045
Cct7	6604.07	0.0969495	0.0739746	1.31058	0.19	0.593733
Aebp2	6583.29	0.0502799	0.0454029	1.10742	0.268114	0.680249
Sept11	6565.31	-0.342489	0.0838397	-4.08505	4.4068e-05	0.0025817
Esyt2	6552.83	0.0447143	0.0656963	0.680621	0.496111	0.834417
Ppp2r1a	6576.49	0.0708554	0.0702952	1.00797	0.313469	0.716796
Pold1	6577.54	0.0208723	0.0842701	0.247683	0.804379	0.952319
Ranbp2	6540.11	-0.121449	0.0898071	-1.35233	0.176268	0.577653
Upf1	6545.33	-0.0113211	0.0500807	-0.226057	0.821157	0.957469
Tet3	6510.99	0.0485907	0.143792	0.337923	0.735421	0.934576
Otud5	6541.35	-0.0680183	0.054114	-1.25695	0.208773	0.615148
Tgfb1	6551.5	0.0208118	0.056789	0.366476	0.71401	0.92753
Gpr68	6527.5	-0.0141894	0.0810742	-0.175017	0.861066	0.967832
Anapc1	6515.84	0.0136363	0.0761739	0.179015	0.857926	0.966817
Rab1b	6533.78	0.034893	0.0843565	0.413638	0.679139	0.914078
Aspm	6518.48	-0.00401119	0.0960242	-0.0417727	0.96668	0.992762
Il27ra	6491.15	-0.0105968	0.0806448	-0.131401	0.895458	0.976262
Hk1	6517.06	0.0883622	0.0564517	1.56527	0.11752	0.487867
Anp32a	6507.37	0.0574916	0.057657	0.997131	0.318701	0.720103
Gm43305	6520.05	-0.0126871	0.960841	-0.0132042	0.989465	0.996707
Dbnl	6508.93	0.0581677	0.0613767	0.947716	0.343274	0.738793
Stat3	6501.9	0.150577	0.0791741	1.90184	0.0571915	0.338395
Rps12-ps3	6529.25	0.264952	0.0991222	2.67299	0.00751791	0.104211
Rab8a	6490.81	-0.103844	0.0736106	-1.41073	0.158325	0.554379
Rnf10	6472.39	0.0764307	0.050238	1.52137	0.128166	0.508346
Dok2	6475.39	-0.152081	0.124145	-1.22503	0.220564	0.629805
Srgn	6484.21	-0.00298351	0.118875	-0.025098	0.979977	0.99512
Celf1	6436.95	0.0980677	0.0953449	1.02856	0.303688	0.709784
Pkn1	6458.72	0.0616153	0.0491185	1.25442	0.209689	0.615745
Il4ra	6460.28	-0.104504	0.073561	-1.42065	0.15542	0.550062
Trdc	6459.96	0.169753	0.0922131	1.84088	0.0656397	0.360651
Dctn1	6451.42	0.163609	0.0491592	3.32815	0.000874233	0.0236608
Taok2	6423.2	0.0937636	0.07008	1.33795	0.180912	0.582949
Ptk2b	6427.96	-0.134079	0.0551429	-2.43147	0.0150376	0.15646
Mbp	6404.38	0.009153	0.0459411	0.199233	0.84208	0.963383
Papola	6403.5	-0.07125	0.0554556	-1.28481	0.198858	0.603612
S1pr1	6384.41	-0.202268	0.310271	-0.651906	0.514462	0.844056
Adamts10	6387.5	0.227607	0.0705519	3.2261	0.00125489	0.0304338
Klf6	6401.59	0.156198	0.0631874	2.47197	0.0134369	0.146491
Mcm2	6388.61	-0.0836092	0.0828562	-1.00909	0.312933	0.716523
Cdc42se2	6359.77	-0.00501704	0.0635779	-0.0789117	0.937103	0.985717
Cep250	6340.03	-0.0580626	0.0871299	-0.666391	0.505161	0.84002
Mapre1	6358.4	-0.0796347	0.0598189	-1.33126	0.183103	0.584714
Cytip	6349.41	-0.0672127	0.0823162	-0.816519	0.414203	0.790911
Pim1	6319.37	-0.281448	0.0776014	-3.62684	0.000286914	0.0105271
Nup153	6305.43	-0.0493564	0.0708037	-0.697088	0.485748	0.829448
Gm6472	6342.42	0.261616	0.0985166	2.65555	0.00791782	0.107864
Ppm1h	6310.36	0.0889293	0.0650559	1.36697	0.171635	0.572617
Herc2	6269.5	0.0268528	0.140492	0.191134	0.84842	0.965421
Usp48	6284.63	0.00524926	0.0785946	0.066789	0.94675	0.987521
Mxd4	6311.87	0.211841	0.119605	1.77118	0.0765304	0.392184
Prpf38b	6270.86	-0.0372557	0.0928927	-0.401062	0.688375	0.917661
Mta1	6308.15	0.145014	0.052898	2.74139	0.00611795	0.0914277
Fgfr1op2	6291.88	-0.000975657	0.0503884	-0.0193627	0.984552	0.995553
Usp1	6300.41	-0.114725	0.074358	-1.54288	0.12286	0.498016
Ubr5	6272.26	0.0427769	0.0923239	0.463335	0.643124	0.89901
Bub1b	6308.68	-0.0125975	0.0903918	-0.139365	0.889162	0.975197
Ipo5	6285.12	-0.0469426	0.0759977	-0.617685	0.536783	0.858611
Rnf166	6281.7	0.177652	0.061764	2.8763	0.00402364	0.0701227
Cct8	6276.08	-0.0208372	0.0680717	-0.306106	0.759524	0.93943
Ybx3	6267.5	-0.083213	0.0758856	-1.09656	0.272835	0.684539
Cabin1	6250.13	0.08251	0.0852459	0.967906	0.333091	0.730279
Kmt2b	6229.68	0.0535842	0.111329	0.481313	0.630294	0.89496
Abr	6251.99	0.0950716	0.0636574	1.49349	0.135309	0.519598
Herc1	6216.9	0.137569	0.131276	1.04794	0.294667	0.700807
Sympk	6250.6	0.166777	0.0533353	3.12695	0.00176628	0.0392016
Prdx1	6251.87	-0.184161	0.0964766	-1.90887	0.0562795	0.334535
Stat5b	6239.73	0.17004	0.0400317	4.24764	2.16031e-05	0.00150756
H13	6212.59	-0.236289	0.048899	-4.8322	1.35036e-06	0.00015503
Ube2s	6246.34	-0.127207	0.118806	-1.07071	0.2843	0.694752
Akt2	6223.44	0.000537799	0.0673273	0.00798783	0.993627	0.99794
Gnai3	6209.62	-0.0438848	0.0562224	-0.780557	0.435063	0.801353
Atp10a	6216.83	0.0272328	0.0659748	0.412776	0.679771	0.914125
Atad2	6189.14	-0.15807	0.0907603	-1.74162	0.0815758	0.40705
Gimap8	6176.57	-0.101672	0.0848951	-1.19762	0.231065	0.640219
Phgdh	6219.8	0.0705386	0.088553	0.79657	0.425701	0.797498
Cd96	6202.34	0.104983	0.109114	0.962143	0.335978	0.73235
Ogdh	6190.76	0.142497	0.0481682	2.95832	0.00309324	0.0574874
Tax1bp1	6179.04	-0.0544636	0.0639279	-0.851954	0.39424	0.777141
Lmf2	6179.93	-0.0104301	0.0665688	-0.156682	0.875496	0.971662
Was	6177.78	0.0745906	0.0588209	1.2681	0.204763	0.610984
Txnrd1	6167.76	0.00422464	0.0459788	0.0918823	0.926792	0.983426
Trp53	6164.16	-0.130564	0.0655248	-1.99259	0.0463065	0.301013
Tap2	6156.64	0.0855533	0.0792042	1.08016	0.280071	0.690605
Rbm5	6139.13	-0.011043	0.0679097	-0.162613	0.870823	0.97084
Rfwd3	6151.24	-0.0944329	0.0539926	-1.749	0.0802914	0.403253
Ints1	6153.31	0.0867081	0.0742907	1.16715	0.243151	0.654484
1700020I14Rik	6127.56	-0.0497872	0.0712086	-0.699174	0.484443	0.828612
Abhd2	6136.89	-0.0724422	0.0576891	-1.25573	0.209213	0.615612
Lars2	6161.11	0.282141	0.122423	2.30465	0.0211863	0.194335
Dazap1	6146.15	-0.00607793	0.0660287	-0.0920498	0.926659	0.983426
Vav1	6137.57	0.0238259	0.0541088	0.440334	0.659695	0.906741
Txnip	6097.23	-0.917906	0.0959716	-9.56434	1.12917e-21	2.00937e-18
Ctdsp2	6126.25	-0.0466563	0.0845138	-0.552055	0.580911	0.877539
Cast	6115.83	-0.103247	0.047332	-2.18133	0.0291591	0.23426
Rbms1	6128.59	0.0650743	0.0481573	1.35129	0.176604	0.57796
Pnn	6084.82	0.0818257	0.103258	0.792438	0.428105	0.798981
Purb	6094.31	0.0920827	0.0811425	1.13483	0.256448	0.668585
Irf1	6098.4	0.132609	0.133038	0.996781	0.318871	0.720146
Igf2r	6070.38	-0.236039	0.0772015	-3.05744	0.00223235	0.0457263
Foxo1	6071.66	-0.148442	0.0918159	-1.61674	0.105934	0.46374
Cd48	6071.81	-0.234064	0.0789615	-2.96428	0.00303394	0.0568305
Usp25	6092.64	0.052385	0.0634537	0.825563	0.409052	0.788526
Cd6	6066.56	0.161938	0.144723	1.11895	0.263161	0.674393
Atp5f1	6093.69	-0.0676507	0.0904738	-0.747739	0.454618	0.814138
Pafah1b1	6066.78	-0.0305733	0.0543876	-0.562137	0.574023	0.875392
Selenot	6065.37	-0.0986824	0.0591557	-1.66818	0.0952802	0.442403
Abca7	6062.47	0.0489617	0.0669496	0.731322	0.464583	0.818487
Syncrip	6061.2	-0.114327	0.0639465	-1.78786	0.0737985	0.385681
Xrn2	6050.85	-0.239947	0.0787877	-3.04549	0.00232298	0.0469744
Cdk4	6072.96	-0.0513484	0.0814642	-0.630319	0.528486	0.852797
Lta4h	6059.28	0.0688009	0.0598844	1.1489	0.250599	0.662905
Lman2	6065.97	-0.05191	0.0708973	-0.732186	0.464055	0.818487
Phc3	5999.37	-0.204845	0.157949	-1.2969	0.194664	0.599317
Pstpip1	6052.22	0.00666573	0.082019	0.0812707	0.935227	0.985138
Pnisr	6031.91	0.311562	0.116871	2.66586	0.00767914	0.105828
Stat6	6051.73	0.0941628	0.0436898	2.15526	0.0311414	0.242521
Safb	6039.26	0.0234925	0.0564437	0.416211	0.677255	0.913185
Lsm14a	6043.04	0.13214	0.0574796	2.2989	0.0215106	0.196802
Coro2a	6026.05	-0.154746	0.0605212	-2.55689	0.0105611	0.128393
Rnf44	6013.59	0.0585181	0.0558651	1.04749	0.294875	0.701015
Ttyh3	6011.38	0.0739286	0.0888264	0.832281	0.40525	0.785559
Cad	6022.95	0.0390618	0.106096	0.368174	0.712744	0.926758
Epb41	6027.64	0.0618893	0.0582239	1.06295	0.287803	0.697035
Eif4g3	5993.26	-0.0212758	0.0912735	-0.2331	0.815684	0.956526
Slc38a2	6009.47	-0.0505226	0.0512342	-0.986111	0.324079	0.72346
Hdac1	6014.52	-0.040337	0.0555051	-0.726726	0.467394	0.820041
Mdh2	6025.58	-0.000769242	0.0770974	-0.00997753	0.992039	0.997293
Agfg1	6003.39	0.0236564	0.0505979	0.467537	0.640116	0.897359
Traf3ip3	5982.12	-0.021461	0.0671029	-0.319823	0.749103	0.936857
Gtpbp1	5994.05	0.00105695	0.0487406	0.0216852	0.982699	0.995452
Arl6ip5	5977.56	-0.171703	0.0567558	-3.0253	0.00248388	0.0489758
Cd27	5962.73	0.0301738	0.0631893	0.477514	0.632996	0.895395
Adam19	5972.88	0.0749549	0.0795433	0.942317	0.346031	0.740431
Cox6a1	5997.51	0.0319967	0.108725	0.294289	0.768537	0.942615
Fbrs	5959.35	0.0946977	0.071878	1.31748	0.187679	0.58965
Dnajc5	5957.84	-0.0136775	0.049261	-0.277654	0.781278	0.947625
Arpc4	5971.44	-0.0384721	0.0626471	-0.614108	0.539144	0.860061
Nipbl	5939.6	-0.0144598	0.098456	-0.146866	0.883238	0.974386
Pim2	5943.58	-0.393233	0.0783471	-5.01911	5.19102e-07	6.71813e-05
Chd8	5937.38	-0.0655183	0.0930754	-0.703928	0.481478	0.827253
Elovl5	5950.98	-0.181514	0.0827226	-2.19425	0.0282174	0.229939
Asxl1	5951.34	-0.0622147	0.0696115	-0.893742	0.37146	0.759497
Gm6793	5954.74	-0.0320559	0.0741269	-0.432446	0.665417	0.909245
Rtn3	5954.62	-0.0448283	0.0543247	-0.825193	0.409262	0.78861
Sri	5950.37	0.019308	0.073321	0.263335	0.792293	0.950287
Arhgef6	5943.7	0.061435	0.0450053	1.36506	0.172234	0.57296
Snx5	5940.23	-0.0967126	0.0740211	-1.30655	0.191364	0.59487
Tnks2	5927.95	-0.124127	0.0641289	-1.93559	0.052918	0.323739
Qars	5945.72	0.0920248	0.0657364	1.39991	0.161541	0.558674
Ubn1	5920.98	-0.114255	0.0537917	-2.12402	0.0336681	0.252263
Notch2	5903.23	-0.0151326	0.098928	-0.152966	0.878425	0.9728
Bclaf1	5899.06	-0.0109982	0.0780305	-0.140948	0.887911	0.974923
Abcf1	5910.47	-0.0377014	0.0429014	-0.878792	0.379514	0.764398
Fubp1	5883.4	0.0810258	0.119005	0.68086	0.49596	0.834375
Il21r	5889.7	-0.0761425	0.0657619	-1.15785	0.246925	0.659517
Notch1	5870.73	-0.123523	0.0853518	-1.44723	0.147834	0.538447
Kars	5901.31	0.0254643	0.0741539	0.343398	0.731299	0.933785
Adgrg5	5884.61	0.143027	0.101916	1.40339	0.160501	0.557543
Paics	5876.75	-0.0484302	0.0688693	-0.70322	0.481919	0.827253
Cblb	5850.36	-0.0544674	0.0869451	-0.626458	0.531015	0.854763
Orai2	5843.42	-0.0910277	0.0689337	-1.32051	0.186664	0.589213
Spag5	5864.58	-0.0514759	0.0718637	-0.716299	0.473807	0.823781
Rpn1	5870.73	-0.0791034	0.0788237	-1.00355	0.315597	0.718494
Rpsa-ps10	5877.41	0.237241	0.0778329	3.04808	0.00230312	0.0467053
Stt3b	5861.11	-0.0158238	0.0576332	-0.274561	0.783654	0.947926
Tfdp1	5859.58	-0.0148057	0.0780076	-0.189798	0.849467	0.965464
Fzr1	5864.55	0.00167438	0.0938705	0.0178372	0.985769	0.995956
Slc28a2	5798.64	-0.130703	0.117099	-1.11618	0.264345	0.67538
Inpp5d	5845.64	0.107575	0.0751297	1.43186	0.152183	0.545082
Adgre5	5831.7	0.0242185	0.0905539	0.267448	0.789124	0.949415
Cd2	5839.12	-0.0370787	0.077534	-0.478226	0.63249	0.895379
Arglu1	5806.6	0.115072	0.103076	1.11638	0.26426	0.67538
Kifc1	5834.99	-0.0809072	0.0707392	-1.14374	0.252732	0.665044
Tle3	5811.55	-0.091814	0.0839186	-1.09408	0.273918	0.685348
Dnaja1	5816.91	-0.170302	0.061291	-2.77858	0.00545977	0.0849457
Nsa2	5825.91	0.154907	0.0568747	2.72364	0.00645659	0.0945829
Uhmk1	5806.07	0.0345029	0.0660013	0.522761	0.601141	0.886091
Arpc3	5825.75	-0.00937305	0.0997407	-0.0939742	0.92513	0.983424
Ndfip1	5813.98	0.0425569	0.0848395	0.501617	0.615937	0.89002
Nktr	5765.15	-0.0279614	0.137055	-0.204015	0.838341	0.962339
Cd247	5797.04	-0.16587	0.0667084	-2.4865	0.0129006	0.143175
Kmt2e	5764.05	-0.103778	0.103245	-1.00516	0.314821	0.717705
Tcof1	5782.61	-0.0525293	0.0899262	-0.584138	0.559128	0.868545
Tmc6	5757.85	0.038127	0.0904419	0.421564	0.673343	0.912312
Suz12	5770.43	-0.0265735	0.0499039	-0.532494	0.594384	0.883765
Eml3	5761.62	-0.0540398	0.082021	-0.658853	0.50999	0.842054
Ppp4c	5783.93	0.00479244	0.0778159	0.0615869	0.950892	0.9886
Sh2b1	5757.46	0.0171261	0.0634982	0.26971	0.787383	0.949177
Pbrm1	5758.08	-0.03213	0.0721482	-0.445334	0.656078	0.905346
Dusp11	5749.18	-0.0384862	0.0489256	-0.786627	0.4315	0.800579
Dusp2	5755.03	0.0108872	0.0519623	0.209521	0.834041	0.961037
Tnrc6a	5727.87	0.0601187	0.112606	0.533886	0.593421	0.883236
Snd1	5742.42	0.111334	0.0507766	2.19263	0.0283343	0.230495
Itpkb	5737.22	0.0463276	0.0851224	0.544248	0.586271	0.879393
Rcsd1	5728.07	-0.175121	0.0719551	-2.43376	0.0149428	0.155958
Tnpo1	5728.82	-0.110723	0.0898777	-1.23193	0.217974	0.626481
Pcnt	5718.93	0.0123396	0.0981396	0.125736	0.899941	0.977876
Mat2a	5720.83	-0.0581424	0.0767892	-0.757169	0.448949	0.810556
Hdlbp	5727.25	-0.0334918	0.0508417	-0.658746	0.510059	0.842054
Cox8a	5748.4	-0.0157793	0.101193	-0.155932	0.876086	0.971662
Mybbp1a	5730.76	0.0617887	0.109263	0.565507	0.571729	0.875216
Kif22	5748.01	-0.0171966	0.0927629	-0.185383	0.852929	0.966713
Epn1	5726.26	0.00755968	0.0521244	0.145032	0.884686	0.974389
Skiv2l	5719.7	0.13108	0.042993	3.04888	0.00229696	0.0466469
Atp5c1	5727.88	0.0815849	0.0717536	1.13702	0.255532	0.667452
Bub3	5732.51	-0.0694729	0.0901734	-0.770436	0.441041	0.805142
Sept7	5709.37	-0.111495	0.0730602	-1.52606	0.126994	0.506012
Cenpe	5712.44	-0.0552883	0.0836728	-0.660768	0.508761	0.841587
Bsg	5713.07	-0.11208	0.0637488	-1.75815	0.0787216	0.399387
Ccr5	5689.13	-0.530211	0.154104	-3.44061	0.000580411	0.0173587
Tram1	5703.07	-0.101054	0.0561294	-1.80037	0.0718022	0.37985
Pitpna	5699.83	-0.0933167	0.0704031	-1.32546	0.185018	0.586917
Taldo1	5714.14	0.0508124	0.102254	0.496926	0.619241	0.890269
Ccr7	5675.95	0.181282	0.14412	1.25785	0.208447	0.614888
Atp2a2	5690.32	0.0311813	0.0580235	0.537391	0.590998	0.88182
Mtch1	5692.8	-0.107758	0.0843017	-1.27825	0.201162	0.607258
Ftl1	5702.86	0.180905	0.102724	1.76108	0.0782253	0.397884
Rpl21	5678.45	0.270283	0.146931	1.83953	0.0658375	0.361041
Tmed2	5673.1	-0.0575319	0.0715181	-0.804438	0.421144	0.794848
Picalm	5648.91	-0.18301	0.0674274	-2.71418	0.00664408	0.0959282
Stk24	5655.3	-0.138166	0.0624661	-2.21185	0.026977	0.223421
AC149090.1	5596.76	-0.0931314	0.357721	-0.260347	0.794596	0.950415
Cnot6	5649.39	-0.0256489	0.0590502	-0.434357	0.664029	0.909216
Scaf11	5628.81	-0.0251917	0.0526923	-0.478091	0.632585	0.895379
Usp24	5619.83	0.0333936	0.0823283	0.405616	0.685025	0.916471
Usp7	5622.35	-0.0287687	0.0731734	-0.393158	0.694203	0.920446
Uggt1	5604.76	-0.0798702	0.0589249	-1.35546	0.175272	0.576213
Tacc3	5613.44	0.0159269	0.0726317	0.219283	0.826429	0.958303
Pa2g4	5605.34	0.0733995	0.0755651	0.971342	0.331378	0.729247
Map4k1	5600.57	0.163282	0.0445922	3.66168	0.00025057	0.00971965
Ssbp4	5590.26	0.0151097	0.0610048	0.24768	0.804382	0.952319
Rbm33	5546.07	0.0438795	0.133492	0.328705	0.742379	0.935812
Oas3	5596.53	0.0052351	0.0937304	0.0558527	0.955459	0.989692
Arl2bp	5579.51	0.0145805	0.0659916	0.220945	0.825135	0.958281
Gm10275	5591.73	0.278182	0.0764716	3.63771	0.000275071	0.0103394
Hspa4	5558.81	-0.108565	0.0740814	-1.46549	0.142787	0.531389
Kif15	5549.88	-0.0761336	0.0729109	-1.0442	0.296393	0.702188
Aurkb	5568.71	-0.00600611	0.0821641	-0.073099	0.941727	0.986492
Kcnn4	5549.76	-0.0153926	0.0782672	-0.196667	0.844088	0.964042
Psmb4	5562.71	-0.0471238	0.0943551	-0.499431	0.617476	0.890042
Rpl38	5558.46	0.368355	0.0929587	3.96257	7.41488e-05	0.00389514
Nde1	5558.04	0.0720995	0.0781166	0.922973	0.356021	0.747238
Xpo6	5532.01	0.120545	0.0689696	1.7478	0.0804986	0.403498
F2r	5531.71	-0.215984	0.0879374	-2.45611	0.0140452	0.150336
Atl3	5526.79	-0.00274866	0.0706677	-0.0388956	0.968974	0.993045
Tacc1	5516.34	0.0103733	0.0709333	0.146241	0.883731	0.974389
Rnf123	5506.18	0.00501243	0.0732783	0.0684027	0.945465	0.987521
Ppp1cb	5520.08	-0.0131988	0.0609506	-0.21655	0.828559	0.958505
Iqgap2	5509.11	-0.196552	0.104055	-1.88893	0.058901	0.343653
Eif3k	5526.41	0.0829107	0.0821508	1.00925	0.312854	0.716523
Erap1	5504.8	0.00900746	0.0564131	0.15967	0.873141	0.971443
Zfp91	5499.22	0.100322	0.0552025	1.81734	0.069165	0.371139
Il7r	5472.07	-0.393221	0.0891796	-4.40931	1.037e-05	0.000843583
Nap1l4	5505.51	0.0549768	0.046334	1.18653	0.235412	0.646225
Ctdsp1	5501.06	0.108885	0.0593635	1.83421	0.066623	0.364366
Pitpnc1	5471.74	0.0177607	0.0708403	0.250715	0.802034	0.951428
Ppp1r15b	5479.07	-0.00593766	0.063647	-0.0932906	0.925673	0.983424
Dpp4	5470.55	0.0900448	0.0830356	1.08441	0.278182	0.688881
Kidins220	5459.95	-0.0745124	0.0682435	-1.09186	0.274894	0.686454
M6pr	5478.91	0.0220578	0.0593584	0.371603	0.710188	0.926074
Faah	5462.46	0.0502293	0.0719954	0.697674	0.485381	0.82922
Gak	5464.33	-0.0710512	0.0448132	-1.5855	0.112854	0.477015
Ubr2	5447.19	-0.00959708	0.0748944	-0.128141	0.898037	0.976733
Arcn1	5459.45	-0.0607924	0.0652312	-0.931954	0.351361	0.743787
Rab5c	5469.21	-0.0317914	0.07195	-0.441855	0.658594	0.906305
Chchd2	5477.4	-0.110215	0.111174	-0.991373	0.321504	0.721864
Itsn2	5446.87	0.0286519	0.0797011	0.359492	0.719227	0.929375
Dnajc9	5460.32	-0.0792309	0.0889968	-0.890266	0.373323	0.760742
Akap8	5432.71	0.0329237	0.0852414	0.386241	0.699318	0.922457
Irak1	5450.13	0.0992771	0.0538059	1.8451	0.0650234	0.358533
Ly6c2	5452.04	-1.05055	0.177966	-5.90308	3.56769e-09	8.46494e-07
Srebf1	5451.49	-0.171257	0.0766977	-2.23289	0.0255563	0.216044
Tprgl	5457.04	0.0361664	0.108887	0.332146	0.739779	0.935219
Tra2b	5438.04	-0.0977097	0.0564107	-1.73211	0.0832537	0.411385
Peli1	5419.58	-0.0450611	0.0751188	-0.599865	0.548597	0.864284
Arhgef2	5426.24	-0.125957	0.0463177	-2.7194	0.00653997	0.0951974
Yy1	5440.74	-0.0411859	0.062534	-0.658617	0.510142	0.842054
Fam169b	5410.36	-0.0832163	0.081188	-1.02498	0.305371	0.710885
Ap3d1	5426.77	0.0601755	0.0476708	1.26231	0.206836	0.613187
Gls	5413.02	-0.034698	0.0736384	-0.471195	0.637502	0.896077
Mbd2	5426.25	0.00247659	0.0746286	0.0331856	0.973527	0.993357
Def6	5427.12	-0.0253889	0.0520488	-0.487791	0.625698	0.893262
Uqcrc1	5439.56	0.00438163	0.0832872	0.0526087	0.958044	0.990649
Efr3a	5417.49	-0.00985275	0.0413321	-0.23838	0.811587	0.955171
Ptms	5446.57	0.141235	0.135892	1.03932	0.298658	0.704857
Chmp4b	5424.96	-0.0418876	0.0868533	-0.48228	0.629607	0.894595
Mdh1	5422.35	-0.0385909	0.0892111	-0.43258	0.66532	0.909245
Rbm25	5377.84	-0.00314247	0.115272	-0.0272612	0.978251	0.99451
Tfrc	5379.16	-0.11992	0.131802	-0.909852	0.3629	0.753605
B4galt5	5390.62	-0.160041	0.0681959	-2.34679	0.0189362	0.180197
Gmip	5372.16	0.0809522	0.081458	0.99379	0.320325	0.720741
Atp5g2	5405.81	0.090821	0.0912437	0.995368	0.319557	0.720373
Dtx3l	5370.73	-0.0251802	0.0838758	-0.300209	0.764018	0.941711
Atp13a1	5374.81	0.00750394	0.0597044	0.125685	0.899981	0.977876
Ezh2	5386.21	-0.0212639	0.0692394	-0.307107	0.758762	0.939273
Setd7	5352.13	0.042577	0.111161	0.38302	0.701705	0.923476
Rnf38	5363.38	-0.00206741	0.0589893	-0.0350472	0.972042	0.993045
Api5	5366.1	-0.0517473	0.0659838	-0.784243	0.432898	0.801291
Kdm3b	5346.37	-0.0169764	0.0655319	-0.259056	0.795592	0.950415
Fam49b	5353.1	-0.00723946	0.055329	-0.130844	0.895899	0.976385
Sp1	5344.21	0.042749	0.0602524	0.709498	0.478015	0.827199
Prpf4b	5324.78	-0.0789508	0.0797755	-0.989663	0.322339	0.72208
Glg1	5330.96	0.0180591	0.0820253	0.220165	0.825743	0.958303
Sf3a1	5340.94	0.0790355	0.0610976	1.29359	0.195806	0.600261
Matr3	5332.45	0.0129502	0.0743745	0.174121	0.86177	0.967832
Ep300	5317.89	-0.0361658	0.0963646	-0.375301	0.707436	0.925281
Gcn1l1	5324.12	0.0622001	0.0800988	0.776542	0.437429	0.802732
Gm6136	5341.76	0.257919	0.0738879	3.49068	0.000481801	0.0150086
Cd82	5324.23	-0.268191	0.0997064	-2.68981	0.00714937	0.100373
mt-Rnr1	5315.5	-0.220329	0.0981625	-2.24453	0.0247982	0.212667
Smarca5	5317.33	-0.117637	0.0594301	-1.97942	0.0477689	0.306324
Gdi1	5306.85	0.264846	0.0928301	2.85302	0.00433064	0.0735692
Cdca3	5334	-0.0528185	0.0938855	-0.562584	0.573718	0.875271
Rnf114	5317.9	0.0278173	0.0766684	0.362827	0.716734	0.92875
Ski	5307.3	-0.0575696	0.0643155	-0.895112	0.370727	0.759159
Sec61a1	5317.06	-0.0504703	0.0668977	-0.75444	0.450585	0.81176
Coro7	5286.52	-0.0885182	0.100125	-0.884075	0.376655	0.761959
Scaf1	5302.9	-0.00996695	0.0548226	-0.181804	0.855737	0.966817
Pde7a	5302.22	0.0188649	0.0746503	0.252711	0.800492	0.951077
Eef1d	5313.26	0.0841707	0.0669676	1.25689	0.208794	0.615148
Emp3	5312.8	-0.0303432	0.0901528	-0.336575	0.736438	0.934958
Csnk1d	5300.29	0.00787005	0.0482774	0.163017	0.870505	0.97084
Luc7l3	5283.42	0.118061	0.0742902	1.58919	0.112018	0.475435
Cyth1	5281.31	-0.0217184	0.0650174	-0.334039	0.73835	0.935046
Slc6a6	5284.81	0.10382	0.0747971	1.38803	0.165129	0.56461
Setd5	5270.28	-0.0237409	0.0784429	-0.302652	0.762155	0.940638
Rmnd5a	5279.99	0.0151906	0.0523094	0.290398	0.771512	0.943878
Twf2	5286.65	-0.153859	0.078333	-1.96417	0.0495102	0.312146
Gltp	5297.22	0.062002	0.0736234	0.842151	0.399703	0.78144
Tmem123	5280.51	0.0305407	0.052329	0.583629	0.55947	0.868835
Gm1966	5246.58	-0.274894	0.0882956	-3.11334	0.00184981	0.0403275
Dap	5288.83	-0.15478	0.10096	-1.53309	0.125255	0.502468
Csrp1	5286.63	-0.117953	0.093435	-1.26241	0.206803	0.613187
Foxp1	5249.08	-0.10319	0.0956812	-1.07848	0.28082	0.691054
Agpat3	5269.02	0.165992	0.0752515	2.20582	0.0273963	0.225572
Pcnx3	5249.46	0.066863	0.0943055	0.709004	0.478322	0.827253
Lypla2	5268.46	-0.0308156	0.0606662	-0.507954	0.611485	0.888277
Adam10	5262.26	-0.0319753	0.0483612	-0.661178	0.508498	0.841587
Plk1	5283.52	-0.0819488	0.103075	-0.795042	0.426589	0.798333
Supt6	5249.66	-0.00503009	0.0702161	-0.0716373	0.942891	0.986767
Tnfrsf1b	5259.94	-0.0261215	0.0660302	-0.395599	0.692401	0.919722
Tmem30a	5253.72	-0.00868271	0.0516774	-0.168018	0.866569	0.969328
Safb2	5240.27	0.0759466	0.0786664	0.965426	0.334332	0.730635
Ccng1	5245.62	-0.115506	0.0757956	-1.52392	0.12753	0.507149
Tcf12	5248.84	0.0872662	0.0531768	1.64106	0.100786	0.450948
Cpsf1	5238.5	0.0740403	0.0611498	1.2108	0.225971	0.634252
Dpy19l1	5232.61	-0.041858	0.0543011	-0.77085	0.440796	0.805142
Srsf7	5235.54	0.0607586	0.059891	1.01449	0.31035	0.714973
Gars	5235.04	-0.0786472	0.079998	-0.983114	0.325551	0.724879
Tmem50a	5231.19	0.0332872	0.0884456	0.376358	0.706651	0.925046
Amfr	5231.81	0.0575354	0.0578316	0.994878	0.319795	0.720373
Ddost	5233.85	-0.00546791	0.0717245	-0.0762349	0.939232	0.98616
Plp2	5239.19	-0.0844829	0.101244	-0.834447	0.404029	0.785006
Ppp1r12c	5222.35	0.117979	0.0500045	2.35937	0.018306	0.176681
Sirt7	5215.02	-0.00402325	0.0694427	-0.0579362	0.953799	0.989038
Rab7	5221.76	0.0191638	0.0656283	0.292006	0.770282	0.943495
Odf2	5209.27	0.0754727	0.0604831	1.24783	0.212093	0.618214
Hadha	5200.5	0.0246729	0.0508661	0.485056	0.627636	0.894182
Mical1	5186.16	-0.105661	0.0592126	-1.78444	0.0743518	0.387074
Clspn	5181.6	-0.142332	0.0804035	-1.77022	0.0766912	0.392584
Mkl1	5172.85	-0.165337	0.0631858	-2.61669	0.00887878	0.116175
Phc2	5191.78	0.0986003	0.0720944	1.36765	0.17142	0.572208
Kmt5a	5178.86	0.00847158	0.0650121	0.130308	0.896323	0.976385
Cpsf6	5162.96	0.0184446	0.0911015	0.202462	0.839555	0.962727
Atp2b4	5174.23	0.162441	0.0834381	1.94684	0.0515534	0.317995
Slc25a4	5186.17	-0.00985848	0.0777258	-0.126837	0.89907	0.977259
Puf60	5181.26	0.0651738	0.0598443	1.08906	0.276129	0.686873
Cit	5159.08	0.0449938	0.107629	0.418046	0.675913	0.913185
Pabpc4	5175.57	0.152888	0.0784794	1.94813	0.0513995	0.317727
Tmod3	5151.02	-0.132064	0.0597832	-2.20905	0.0271713	0.224476
Kif5b	5142.5	0.0214559	0.0729085	0.294285	0.76854	0.942615
Aco2	5153.56	0.0273368	0.0596428	0.458342	0.646706	0.901545
Kif23	5148.63	-0.0587863	0.0750657	-0.783132	0.433549	0.801353
Dnajc3	5144.76	-0.0201222	0.0474859	-0.423752	0.671747	0.911368
Mtmr3	5122.87	-0.131763	0.0941629	-1.39931	0.161719	0.558794
Aqr	5140.52	-0.0432228	0.064522	-0.669892	0.502926	0.83871
Poldip3	5141.93	-0.00615286	0.0511495	-0.120292	0.904252	0.978534
Phf20l1	5102.99	-0.188903	0.112992	-1.67182	0.0945596	0.441216
Zc3h7a	5104.74	-0.0224978	0.109466	-0.205523	0.837163	0.962068
Rbbp6	5111.82	0.0106589	0.105365	0.101162	0.919422	0.981708
Psme3	5122.91	-0.0742336	0.0616173	-1.20475	0.228299	0.636643
Atp13a3	5112.93	-0.105279	0.0994399	-1.05872	0.289727	0.697686
Anxa2	5147.79	-0.0721957	0.141431	-0.510465	0.609726	0.88777
Sod1	5124.07	0.0517213	0.0830042	0.623117	0.533207	0.856329
Cndp2	5099.46	-0.283917	0.0710446	-3.99632	6.43355e-05	0.00349573
Ptp4a3	5100.86	-0.371041	0.0624024	-5.94595	2.74856e-09	6.98257e-07
Ankrd17	5094.83	0.00819263	0.0810489	0.101083	0.919485	0.981708
Sart1	5106.29	0.0715901	0.0497197	1.43987	0.149903	0.541735
Leprotl1	5108.16	0.0398302	0.0727168	0.547744	0.583868	0.878985
Polr2m	5107.76	0.0414478	0.0616452	0.672361	0.501354	0.837508
Resf1	5070.73	-0.296294	0.0800333	-3.70213	0.0002138	0.00864676
Gramd1b	5076.1	0.140568	0.102265	1.37454	0.169273	0.569257
Rai1	5067.45	-0.0849975	0.0959856	-0.885524	0.375874	0.761635
Prc1	5089.05	-0.152998	0.0680941	-2.24686	0.0246488	0.211897
Otud4	5063.42	-0.107	0.0898871	-1.19038	0.233897	0.644659
Ctsb	5086.16	0.111857	0.0743404	1.50466	0.132412	0.514965
Dnajc7	5072.19	0.141092	0.0534372	2.64034	0.00828236	0.111444
Rnf145	5064.43	-0.0588372	0.0635383	-0.926012	0.35444	0.746277
Ncor2	5048.04	-0.0263616	0.106011	-0.248668	0.803618	0.952248
Pacs1	5068.6	0.0104339	0.0573814	0.181835	0.855712	0.966817
Rhog	5081.47	0.0353998	0.0953041	0.371441	0.710309	0.926074
Rrp1	5074.06	0.0746079	0.0627349	1.18926	0.234338	0.644934
Ipcef1	5047.23	-0.0895756	0.0733809	-1.22069	0.222202	0.631016
Dhx16	5049.3	0.0782916	0.0529811	1.47773	0.139481	0.52571
Cdkn1b	5039.91	0.0514291	0.0689699	0.745674	0.455864	0.814721
Rassf2	5031.39	-0.0551182	0.0564284	-0.976781	0.328677	0.726972
Grap	5039.86	0.105938	0.083321	1.27144	0.20357	0.609592
Pom121	5031.48	-0.0124161	0.110983	-0.111874	0.910923	0.979893
Dgkd	5024.31	0.121247	0.0641823	1.88911	0.0588772	0.343653
Ccnf	5031.69	-0.229433	0.0935428	-2.4527	0.0141788	0.151198
Lamp1	5020.76	0.0428073	0.06553	0.653248	0.513597	0.843655
Sdcbp	5022.7	-0.117729	0.0865607	-1.36008	0.173805	0.574698
Cd2bp2	5016.2	0.0357436	0.0621125	0.575466	0.564976	0.872093
Ghitm	5014.12	-0.0787475	0.0596145	-1.32095	0.186519	0.589023
Ssh2	4976.84	-0.169046	0.108206	-1.56227	0.118224	0.488543
Rdx	4991.28	-0.0188298	0.0392874	-0.479282	0.631738	0.895379
Tuba4a	4995.44	-0.134426	0.0780435	-1.72245	0.0849887	0.416776
Sbno1	4967.56	-0.0202328	0.0772832	-0.261801	0.793475	0.950287
Pbxip1	4974.28	0.0686736	0.0700596	0.980217	0.326979	0.726192
Ptpn1	4966.66	-0.157944	0.0539996	-2.9249	0.00344564	0.0624868
Szt2	4951.42	0.0883442	0.115943	0.761962	0.446083	0.808479
Actn1	4936.46	-0.142163	0.27062	-0.525325	0.599358	0.886091
Lgals3bp	4965.88	-0.298819	0.0815827	-3.66277	0.0002495	0.00971965
Smc6	4961.12	-0.0664819	0.0488934	-1.35973	0.173914	0.574698
Nup205	4968.91	-0.0226303	0.084867	-0.266656	0.789734	0.949415
Ncapg2	4955.93	-0.177834	0.0894855	-1.98729	0.0468901	0.302871
Trim56	4931.11	-0.0846357	0.108089	-0.783016	0.433618	0.801353
Zmiz1	4955.87	-0.105755	0.117519	-0.8999	0.368174	0.757628
H2afv	4972.76	-0.136543	0.124438	-1.09727	0.272522	0.684131
Ttc39b	4920.66	-0.149078	0.109412	-1.36253	0.17303	0.574053
Hmgb1	4946.5	-0.140688	0.0557868	-2.52188	0.0116729	0.135534
Lyst	4901.48	-0.298084	0.154352	-1.9312	0.0534585	0.325173
Nfatc2	4932.85	-0.191391	0.0947967	-2.01896	0.0434911	0.289453
Ssbp3	4960.08	0.0562863	0.0795726	0.707358	0.479344	0.827253
Kdm2a	4938.74	-0.0154899	0.0612302	-0.252978	0.800285	0.950982
Psmb10	4950.69	0.0656797	0.127241	0.516183	0.605727	0.887062
Psmb1	4940.78	0.0030522	0.0929906	0.0328227	0.973816	0.993473
Git2	4921.88	-0.056221	0.0394206	-1.42618	0.153816	0.54743
E2f4	4923.26	0.0839173	0.0452067	1.8563	0.0634106	0.355119
Zbtb7a	4917.22	-0.00476499	0.0551367	-0.0864214	0.931131	0.984049
Grb2	4917.47	-0.0531303	0.0510345	-1.04107	0.297844	0.703835
Nsmaf	4912.87	0.0310922	0.0726003	0.428266	0.668457	0.909549
Kat6a	4898.62	-0.0416256	0.103084	-0.403803	0.686358	0.916668
Abhd8	4912.03	0.183829	0.077183	2.38172	0.0172318	0.169883
Ywhag	4908.02	0.0143605	0.0584599	0.245646	0.805956	0.952719
Pld3	4900.04	0.0674297	0.0805908	0.836693	0.402765	0.783837
Srp72	4892.05	0.0405605	0.0474299	0.855168	0.392458	0.776285
Ppp6r3	4891.73	-0.0283059	0.0559573	-0.505849	0.612962	0.889152
Atp5g3	4901.16	0.024939	0.0777503	0.320758	0.748394	0.936857
Eif3m	4889.17	0.0291964	0.0808063	0.361314	0.717865	0.929132
Gmfg	4898.68	0.0480744	0.116178	0.413801	0.67902	0.914078
Arhgef3	4865.81	-0.255159	0.0511601	-4.98746	6.11775e-07	7.70729e-05
Malat1	4848.43	0.151461	0.158788	0.953855	0.340157	0.736598
Mink1	4853.73	0.0414521	0.0926659	0.447328	0.654638	0.904623
Hspa9	4873.44	0.0751417	0.0884295	0.849735	0.395472	0.77861
Trir	4877.94	0.0383991	0.0822205	0.467026	0.640482	0.897519
Flnb	4862.86	-0.00269269	0.118989	-0.0226297	0.981946	0.995452
Kmt2c	4829.16	0.096308	0.169779	0.567254	0.570542	0.875052
D17Wsu92e	4861.49	0.04952	0.0512901	0.965488	0.3343	0.730635
Parp14	4838.08	-0.159498	0.0702566	-2.27022	0.0231942	0.204831
Ccnb1	4876.32	-0.0648408	0.106194	-0.610589	0.541472	0.861644
Psmd3	4865.04	0.0253029	0.0729447	0.346878	0.728683	0.932536
Pik3r1	4847.76	-0.155384	0.0660402	-2.35287	0.0186292	0.178831
Supt16	4850.06	-0.0604273	0.0735386	-0.821709	0.411243	0.790181
Smarcc1	4846.88	-0.0382459	0.0640092	-0.597506	0.550169	0.864497
Cnot6l	4833.64	-0.074511	0.0631428	-1.18004	0.237984	0.649326
Trpv2	4841.11	-0.203334	0.0590792	-3.44171	0.000578044	0.0173243
Cct3	4853.05	0.0261877	0.0819785	0.319446	0.749389	0.936857
Cdk2ap2	4863.39	0.0347138	0.106741	0.325216	0.745017	0.936518
Cmtm6	4835.63	-0.061141	0.0473051	-1.29248	0.19619	0.600869
Fbxl14	4847.35	0.174378	0.047941	3.63736	0.000275449	0.0103394
Cyld	4831.78	0.0369852	0.0575128	0.643078	0.520174	0.847664
Fam189b	4834.93	0.136441	0.0627273	2.17514	0.0296196	0.236028
Erbin	4812.83	-0.0942246	0.0813045	-1.15891	0.246493	0.659052
Vdac1	4824.76	0.0913919	0.0551671	1.65664	0.0975927	0.445726
Tnrc6c	4799.51	0.0548675	0.109093	0.502943	0.615004	0.890018
Marf1	4795.52	-0.00249116	0.0885975	-0.0281177	0.977568	0.99451
Grina	4821.42	0.387594	0.119252	3.2502	0.00115322	0.0287635
Glyr1	4797.4	-0.0999309	0.0489326	-2.04221	0.0411303	0.280427
Ggnbp2	4788.01	-0.000259835	0.0567252	-0.0045806	0.996345	0.998817
Gmfb	4780.41	-0.0919196	0.0609571	-1.50794	0.131571	0.513317
Camk4	4779.24	-0.0781712	0.0674515	-1.15892	0.246487	0.659052
Nacc1	4793.94	0.00947267	0.064678	0.146459	0.883559	0.974386
Tyk2	4787.9	0.0980665	0.0707127	1.38683	0.165493	0.564708
Slk	4782.82	0.0631458	0.056901	1.10975	0.267107	0.679025
Uba2	4794.65	0.0113928	0.0813225	0.140094	0.888586	0.975099
Samd9l	4776.76	0.026868	0.0619915	0.433414	0.664714	0.909245
Eif3i	4786.57	0.0795901	0.0788293	1.00965	0.312662	0.716379
Man2b2	4769.55	0.0410881	0.0721705	0.569319	0.569139	0.874525
Ssr3	4752.2	-0.00536505	0.0565777	-0.0948262	0.924453	0.983424
Tes	4753.95	-0.0385888	0.0735742	-0.524488	0.599939	0.886091
Smc3	4744.6	-0.0486153	0.0655738	-0.741382	0.458462	0.816438
Ddx23	4736.6	0.111036	0.0445541	2.49217	0.0126967	0.141988
Emc10	4742.78	-0.0462193	0.0788226	-0.586372	0.557626	0.867552
Cherp	4730.31	0.0172514	0.0755976	0.2282	0.819491	0.956817
Crlf3	4700.49	-0.301437	0.0993289	-3.03474	0.00240744	0.0480677
Atxn7l3	4722.83	0.0101255	0.0576789	0.175549	0.860648	0.967749
Rpl14-ps1	4732.1	0.383575	0.0814857	4.70726	2.51064e-06	0.000264752
Slbp	4721.58	-0.144806	0.0733046	-1.9754	0.0482232	0.307779
Cdca8	4728.44	0.079655	0.0828119	0.961879	0.33611	0.73235
Rbl1	4707.92	-0.0117712	0.0549986	-0.214028	0.830525	0.959286
Virma	4704.25	-0.0135627	0.0561223	-0.241663	0.809041	0.953779
Eprs	4703.2	0.0331803	0.0655588	0.506115	0.612776	0.889152
Reep5	4707.51	-0.133858	0.0871511	-1.53594	0.124554	0.501381
Ankrd52	4677.12	0.109231	0.138345	0.789554	0.429788	0.799069
Slc38a10	4696.47	0.00297859	0.0556183	0.0535542	0.95729	0.990491
Stk11	4689.22	-0.0378903	0.0439521	-0.862083	0.388642	0.773049
Apbb1ip	4690.36	0.0782273	0.0474266	1.64944	0.0990577	0.448797
Actr1a	4696.78	-0.00743958	0.0678756	-0.109606	0.912722	0.980217
Myl12a	4695.18	-0.0152631	0.0824928	-0.185024	0.85321	0.966754
Zswim8	4669.97	0.0442883	0.0918025	0.48243	0.629501	0.894547
Ncoa2	4673.76	-0.00717966	0.080759	-0.0889024	0.929159	0.983964
Nras	4674.28	0.00205893	0.0406007	0.0507118	0.959555	0.990938
Lbh	4667.32	-0.0583407	0.0604193	-0.965597	0.334246	0.730635
Adar	4652.6	-0.163013	0.0592253	-2.75242	0.00591557	0.0895797
Rbpj	4683.77	0.112889	0.168171	0.671273	0.502047	0.838079
Pip5k1c	4654.87	-0.137801	0.0544547	-2.53056	0.0113881	0.133653
Tmem259	4664.68	0.103102	0.0449618	2.2931	0.0218421	0.198306
Srsf10	4651.15	-0.1148	0.0684885	-1.6762	0.0936993	0.43943
2900097C17Rik	4660.19	0.0727071	0.0481148	1.51112	0.130759	0.512099
Ncoa3	4666.06	0.199581	0.0432855	4.61081	4.01109e-06	0.000383753
Foxk1	4645.92	-0.0419388	0.110111	-0.380877	0.703294	0.923499
Rad23b	4660.15	-0.03887	0.0568846	-0.683313	0.494409	0.833527
Znrf1	4659.2	0.139814	0.154698	0.903786	0.366109	0.756092
Pml	4636.1	-0.292659	0.0574699	-5.09239	3.53579e-07	4.93485e-05
Kdm4a	4649.8	0.166605	0.0430695	3.86829	0.000109603	0.00523763
Vdac2	4646.3	0.0433067	0.0636691	0.680184	0.496388	0.834417
Unc119b	4649.6	0.083433	0.0928758	0.898329	0.36901	0.757714
Ddx24	4642.4	-0.0872802	0.067404	-1.29488	0.195361	0.600024
Arhgap19	4645.01	0.012325	0.0869457	0.141756	0.887273	0.974679
Ndufs2	4637.28	-0.0186597	0.06081	-0.306852	0.758956	0.939273
Mcmbp	4620.58	-0.0431232	0.0539048	-0.799988	0.423717	0.795635
Nek9	4616.54	0.115027	0.0477185	2.41053	0.0159294	0.161958
Uba7	4611.36	0.111299	0.0935877	1.18925	0.234341	0.644934
Bcor	4608.87	-0.0121732	0.0666118	-0.182749	0.854995	0.966817
Copg1	4604	-0.0298246	0.0583149	-0.51144	0.609043	0.88777
Ifi206	4607.86	-0.16288	0.0842918	-1.93234	0.0533174	0.324926
Fkbp5	4616.78	0.0621759	0.0834857	0.74475	0.456423	0.814721
Dcaf15	4605.69	0.0556221	0.06813	0.816412	0.414265	0.790911
Msl1	4599.76	0.134305	0.0539156	2.49102	0.0127375	0.142221
Htt	4584.6	0.0447813	0.110581	0.404964	0.685504	0.916668
Rexo1	4592.39	0.116636	0.0704797	1.65489	0.0979464	0.446769
Sqstm1	4603.62	-0.0021387	0.0966879	-0.0221196	0.982353	0.995452
Zfp217	4588.52	0.00906455	0.0491756	0.18433	0.853755	0.966755
Rab11b	4591.52	-0.0242084	0.0445361	-0.543569	0.586738	0.879428
Oxct1	4597.65	0.0405948	0.0717406	0.565856	0.571492	0.875216
Cenpb	4595.93	-0.0513031	0.0743696	-0.689839	0.490295	0.831229
Capza2	4586.57	-0.0598128	0.0712132	-0.839912	0.400958	0.782137
Trim59	4585.23	0.0602698	0.0890614	0.676723	0.498582	0.836287
Elk4	4563.05	0.141177	0.117567	1.20082	0.229821	0.63881
Impdh2	4594.4	0.0703875	0.0739388	0.95197	0.341112	0.73722
Stim1	4575.66	-0.0316971	0.0564499	-0.561509	0.574451	0.875404
Cdv3	4571.16	-0.0476135	0.0561659	-0.84773	0.396588	0.779057
Tmem234	4562.65	0.0178874	0.0590581	0.302879	0.761982	0.940638
Akr1b3	4569.04	-0.211201	0.0730685	-2.89045	0.0038469	0.0681151
Fam193b	4551.24	0.144416	0.0933697	1.54671	0.121933	0.495814
Ss18	4553.64	-0.184327	0.0479554	-3.84372	0.000121181	0.00561934
Card11	4564.55	0.0162391	0.0616336	0.263477	0.792183	0.950287
Dnaja2	4554.86	-0.0455302	0.0679002	-0.670546	0.50251	0.838655
Zfp445	4524.89	-0.080206	0.0934155	-0.858595	0.390564	0.773996
Ipo7	4544.71	0.0446525	0.0698268	0.639475	0.522514	0.849921
Arih1	4539.57	0.0619962	0.0549897	1.12741	0.259567	0.672018
Mtdh	4540.77	-0.0114699	0.0523907	-0.21893	0.826705	0.958303
Ywhaq	4552.13	-0.0759651	0.0927648	-0.8189	0.412844	0.790259
Rpl21-ps15	4561.46	0.175571	0.107341	1.63564	0.101914	0.454243
Wapl	4529.17	-0.0148081	0.0576374	-0.256918	0.797242	0.950415
2510039O18Rik	4543.55	-0.0647978	0.070746	-0.915921	0.359708	0.750746
Tecr	4543.19	-0.0417955	0.0606913	-0.688656	0.491039	0.831387
Cbx3	4531.73	-0.0572508	0.0614181	-0.932148	0.35126	0.743787
Got2	4522.69	-0.0612374	0.0556541	-1.10032	0.271192	0.683175
Dido1	4509.34	-0.0987788	0.0778433	-1.26894	0.204461	0.610714
Ap1m1	4520.73	-0.00291505	0.0595042	-0.048989	0.960928	0.991208
Tnrc6b	4480.99	0.0331348	0.168942	0.196131	0.844507	0.964042
Ubap2	4504.75	-0.123771	0.0877382	-1.41068	0.158338	0.554379
Ppp3cb	4501.74	0.136625	0.0566307	2.41256	0.015841	0.16189
Klrd1	4484.06	-0.433102	0.123766	-3.49935	0.000466388	0.0147544
Hnrnpr	4489.93	0.0480214	0.0678007	0.708272	0.478776	0.827253
Usp34	4472.53	-0.00892265	0.12086	-0.0738264	0.941149	0.98616
Parp1	4492.31	-0.0462493	0.0907023	-0.509902	0.61012	0.88777
Map2k2	4498.07	-0.0286541	0.077456	-0.369941	0.711427	0.926331
Psip1	4490.07	-0.0760977	0.0691971	-1.09972	0.271453	0.683481
Ctsa	4482.13	-0.178333	0.0662428	-2.69211	0.0071001	0.0998785
Pi4ka	4476.62	0.0306521	0.0667299	0.459345	0.645986	0.901069
Phrf1	4469.06	-0.0270816	0.0649345	-0.417061	0.676634	0.913185
Pimreg	4493.06	-0.0945992	0.12983	-0.728637	0.466224	0.819228
Atp5h	4467.62	-0.0319222	0.0877756	-0.36368	0.716097	0.928435
Rab10	4463.59	-0.00441664	0.0542654	-0.0813895	0.935132	0.985138
Tpst2	4457.52	-0.182834	0.074022	-2.47	0.0135112	0.146648
Hspd1	4462.84	0.0135681	0.0744586	0.182223	0.855407	0.966817
Dot1l	4447.2	0.0613515	0.0968761	0.633299	0.526539	0.852086
Sla	4454.82	-0.165115	0.0745771	-2.21402	0.0268276	0.222953
Cdk6	4403.09	-0.303946	0.254658	-1.19355	0.232655	0.642748
Bcl2l11	4434.9	-0.262151	0.093003	-2.81873	0.00482133	0.0790635
Selenow	4465.21	0.17121	0.0935317	1.8305	0.0671755	0.365982
Phb2	4453.9	0.0843023	0.0598346	1.40892	0.158858	0.555253
Supt20	4431.04	0.028084	0.0814807	0.34467	0.730342	0.933252
Lef1	4423.02	-0.0508187	0.0959232	-0.529785	0.596261	0.884441
Ccdc50	4432.48	0.143364	0.0637957	2.24724	0.0246247	0.211817
Tomm20	4443.21	0.140977	0.0763791	1.84576	0.0649275	0.358469
Prdx6	4438.72	0.108534	0.0620836	1.74819	0.0804317	0.403462
Rock1	4417.21	-0.0292042	0.0460823	-0.63374	0.52625	0.852069
Il18r1	4344	-1.18791	0.171737	-6.91699	4.61333e-12	2.62701e-09
Nrd1	4414.79	0.0854216	0.0536488	1.59224	0.111331	0.474381
Galnt1	4421.68	0.0411251	0.0507879	0.809743	0.418088	0.79253
Crebzf	4410.84	0.0187549	0.0537599	0.348863	0.727192	0.932505
Atp2b1	4395.5	-0.136976	0.102061	-1.34209	0.179566	0.581997
Nek7	4406.92	-0.0406118	0.0513545	-0.790813	0.429053	0.798981
Sar1a	4413.71	-0.00302199	0.0572049	-0.0528274	0.957869	0.990649
Chd2	4398.57	0.0999799	0.0805292	1.24154	0.214408	0.620893
Ralbp1	4416.35	0.00613307	0.0819833	0.0748087	0.940367	0.98616
Bcl9l	4369.67	-0.276122	0.167718	-1.64635	0.0996922	0.450169
Sp3	4393.57	-0.0380568	0.0655811	-0.580301	0.561712	0.870283
Chmp1a	4398.45	-0.0108087	0.0786264	-0.137469	0.89066	0.975482
Socs1	4391.95	0.0663532	0.0762899	0.869751	0.384437	0.769089
Ncapd3	4387.08	-0.100235	0.077267	-1.29726	0.194542	0.599317
Arhgap1	4383.6	-0.139463	0.0502753	-2.77399	0.00553739	0.0858304
Ddx39	4393.51	-0.0759784	0.0838607	-0.906006	0.364932	0.755204
Etf1	4378.44	-0.0814516	0.0531815	-1.53158	0.125627	0.503357
Dck	4377.16	-0.31313	0.0648874	-4.82574	1.39488e-06	0.00015886
Eftud2	4383.32	-0.085451	0.0570629	-1.49749	0.134266	0.518279
Trim25	4362.73	-0.189022	0.0976507	-1.93569	0.0529056	0.323739
Brd8	4377.27	0.0584506	0.0435456	1.34229	0.179503	0.581997
Tcirg1	4373.25	0.0378548	0.0756995	0.500067	0.617028	0.890042
Tcf19	4382.95	-0.148144	0.0790261	-1.87462	0.0608445	0.349357
Tbl1xr1	4361.74	-0.0657076	0.0540594	-1.21547	0.224187	0.632768
Usp4	4368.02	-0.00485561	0.0428278	-0.113375	0.909733	0.979427
H2afj	4381.12	0.132002	0.106029	1.24496	0.213147	0.619193
Mapk8ip3	4354.98	0.266755	0.114563	2.32847	0.0198872	0.186874
Phf12	4363.89	0.0771732	0.0543704	1.4194	0.155783	0.55007
Map7d1	4366.09	-0.154667	0.0595608	-2.59679	0.00940982	0.120466
Pcif1	4367.12	0.0114072	0.0558895	0.204103	0.838273	0.962339
Ttc14	4344.42	0.161866	0.104355	1.55111	0.120875	0.494051
Arfgef1	4348.85	0.00785429	0.0612459	0.128242	0.897958	0.976733
Cbx7	4339.21	0.0648153	0.102654	0.631399	0.52778	0.852727
Zfp106	4358.32	0.160994	0.0600985	2.67884	0.00738784	0.102708
Taf15	4349.33	0.00246483	0.0788135	0.0312742	0.975051	0.994044
Ifitm1	4410.87	-1.04775	0.384695	-2.7236	0.00645755	0.0945829
Khnyn	4353.25	0.213219	0.0932307	2.28701	0.0221954	0.200618
Usp5	4353.68	0.0633222	0.0604563	1.0474	0.294913	0.701015
Prpf40a	4334.73	-0.0438277	0.0691975	-0.63337	0.526492	0.852086
Chtf8	4345.56	-0.0815395	0.0623379	-1.30802	0.190865	0.594434
Zc3h18	4339.29	0.0111731	0.0764198	0.146207	0.883758	0.974389
Irf2bpl	4347.25	0.2143	0.0476126	4.50091	6.76627e-06	0.000580269
Cdk1	4353.25	-0.119461	0.0967988	-1.23412	0.217159	0.625627
Mif	4352.72	0.0146025	0.118435	0.123296	0.901873	0.978246
Zzef1	4313.1	-0.0469803	0.118277	-0.397205	0.691216	0.919641
Traf7	4330.86	0.080323	0.0501024	1.60318	0.108895	0.468915
Rps16-ps2	4344.81	0.240011	0.0796711	3.01252	0.00259086	0.0507339
Ypel3	4322.25	0.0494845	0.140298	0.35271	0.724306	0.932015
Ilf3	4328.51	-0.0129311	0.0559202	-0.231242	0.817127	0.956608
Larp4b	4321.76	-0.019076	0.063248	-0.301606	0.762952	0.941065
Nptn	4321.66	-0.267945	0.0787995	-3.40034	0.000673028	0.019317
Cdk17	4317.79	-0.0703232	0.0657271	-1.06993	0.284652	0.69496
Nop56	4323.8	0.000667376	0.0769661	0.00867104	0.993082	0.997848
Gpr132	4306.02	-0.0509437	0.0774862	-0.657456	0.510888	0.84227
Idh3b	4325.14	0.157058	0.0573542	2.73839	0.00617412	0.0920364
Pigt	4321.15	0.0526662	0.0663758	0.793455	0.427513	0.798958
Ap1b1	4319.14	0.0583422	0.0551371	1.05813	0.289997	0.697686
Stip1	4322.8	-0.00339997	0.0770607	-0.0441207	0.964808	0.992149
Noc2l	4311.1	0.105153	0.10456	1.00567	0.314573	0.717536
Chsy1	4303.79	-0.328455	0.0762066	-4.31006	1.63211e-05	0.00120387
Ssr1	4305.64	-0.0273386	0.0563755	-0.484937	0.627721	0.894182
Ncaph	4309.08	-0.152199	0.0816505	-1.86403	0.062318	0.352888
Csnk2b	4298.33	-0.0826641	0.071906	-1.14961	0.250303	0.662905
Nedd9	4294.01	0.0088867	0.104641	0.0849254	0.932321	0.984488
Clptm1l	4285.62	0.0104781	0.0533817	0.196286	0.844386	0.964042
Cnppd1	4281.76	-0.101592	0.0630056	-1.61243	0.106868	0.465769
Rtcb	4283.99	0.0488075	0.0572713	0.852217	0.394094	0.777141
Rfx7	4274.7	0.0530972	0.0648042	0.819348	0.412588	0.790259
Cul3	4270.18	-0.0777629	0.0553681	-1.40447	0.160179	0.556985
Pxn	4283.05	0.0239076	0.073712	0.324338	0.745682	0.93665
Cmtm7	4282	-0.158214	0.117915	-1.34176	0.179674	0.581997
Cep192	4254.16	-0.0544005	0.0803662	-0.676908	0.498464	0.836217
Psmd8	4269.24	-0.119487	0.0810412	-1.4744	0.140373	0.527063
Setd2	4245.92	-0.0794093	0.0993085	-0.799623	0.423929	0.795772
Ube2d2a	4261.34	-0.103404	0.0770599	-1.34187	0.179639	0.581997
Cd28	4258.2	-0.0736235	0.0627905	-1.17253	0.240986	0.652593
Cdk13	4246.01	0.0260602	0.0698057	0.373325	0.708906	0.92557
Tgoln1	4243.79	-0.0936448	0.0534999	-1.75038	0.0800536	0.403253
Mier1	4237.02	0.0118012	0.0710698	0.166051	0.868117	0.96998
Ssb	4240.96	-0.135246	0.0707672	-1.91114	0.0559865	0.333622
Mapk14	4239.76	-0.0816231	0.0593769	-1.37466	0.169236	0.569257
Man2a1	4237.76	-0.0012606	0.0732818	-0.0172021	0.986275	0.996071
Gabbr1	4204.14	0.127553	0.166512	0.766026	0.443661	0.806737
Stxbp2	4230.7	0.0379847	0.0539152	0.704526	0.481105	0.827253
Trp53i11	4232.02	-0.129745	0.0756887	-1.7142	0.0864927	0.420559
Dnajb6	4225.37	-0.0664481	0.0482281	-1.37779	0.168269	0.567734
Rnf40	4228.24	0.132785	0.0434864	3.05349	0.00226196	0.046098
Pole	4223.5	-0.102664	0.0911834	-1.1259	0.260207	0.67275
Ip6k1	4223.96	0.207473	0.0609523	3.40385	0.000664432	0.0192756
Cbx6	4216.65	0.138411	0.0576589	2.40051	0.0163724	0.164431
Nr1h2	4221.26	0.116292	0.0550013	2.11435	0.0344854	0.255163
Mapkapk3	4220.49	-0.0318421	0.121642	-0.261769	0.793499	0.950287
Stt3a	4214.53	0.0462063	0.0576536	0.801446	0.422874	0.795635
Cep85	4221.45	-0.0572943	0.161334	-0.355129	0.722493	0.931649
Tbc1d10b	4216.35	0.0637203	0.0751578	0.84782	0.396538	0.779057
Hint1	4215.29	0.0207262	0.101435	0.204329	0.838096	0.962339
Piezo1	4191.26	0.0348606	0.124394	0.280244	0.77929	0.946827
Jak2	4201.64	0.0378458	0.0701336	0.539624	0.589456	0.880813
Klhl6	4189.42	-0.288763	0.0842329	-3.42816	0.000607697	0.0179858
Gramd4	4162.72	-0.266105	0.259216	-1.02658	0.30462	0.710589
Cdk19	4199.43	0.0330216	0.0587189	0.562368	0.573865	0.875271
Msl2	4193.11	-0.000885558	0.0502428	-0.0176256	0.985938	0.995956
Phf2	4194.22	0.100825	0.0685579	1.47065	0.141385	0.52856
Gm15427	4215.7	0.210928	0.0998223	2.11303	0.0345978	0.255729
Tut4	4185.16	0.00924087	0.0615369	0.150168	0.880632	0.974022
Atic	4195.23	0.018399	0.117303	0.15685	0.875363	0.971662
Mlxip	4167.81	0.0946786	0.112429	0.842117	0.399722	0.78144
Ankrd10	4158.86	0.010274	0.0930095	0.110462	0.912043	0.980217
Rela	4174.76	0.0311162	0.0535055	0.581552	0.560869	0.86988
Ppp3cc	4176.97	-0.0825323	0.0783876	-1.05287	0.292399	0.700244
Clic4	4187.84	0.128444	0.0922149	1.39287	0.163658	0.562489
Kdm5a	4150.27	-0.1022	0.0923164	-1.10707	0.268266	0.680314
Rgs3	4176.36	0.0802116	0.0776907	1.03245	0.301862	0.708426
Sars	4171.67	0.0374117	0.053605	0.697916	0.48523	0.829061
Dlgap5	4171.66	-0.0656086	0.0764262	-0.858456	0.390641	0.773996
Cmah	4106.13	-0.349467	0.311587	-1.12157	0.262045	0.673314
Dpp9	4163.6	-0.00665517	0.0745887	-0.0892248	0.928903	0.983964
Kif20a	4158.24	-0.144879	0.0993624	-1.45809	0.144816	0.534761
Araf	4126.99	0.0291102	0.0906061	0.321283	0.747996	0.936857
Ap1g2	4146.08	0.105156	0.0536893	1.9586	0.0501591	0.313663
Smg5	4133.99	0.0125326	0.0771608	0.162422	0.870974	0.97084
Eif4a3	4146.74	-0.04817	0.0791742	-0.608405	0.542919	0.862409
Copb2	4135.98	-0.0597836	0.0557759	-1.07185	0.283786	0.694035
Psmc3	4143.97	0.0339625	0.0838755	0.404915	0.68554	0.916668
Lsm4	4142.17	-0.0501826	0.0918555	-0.546321	0.584845	0.879393
Cep350	4114.24	0.0414081	0.122149	0.338997	0.734612	0.934369
Gapvd1	4117.86	-0.0484056	0.0599671	-0.807202	0.41955	0.793716
Cand1	4123.75	-0.102798	0.0490397	-2.09623	0.0360618	0.260862
Cxxc1	4128.4	0.0859484	0.0507346	1.69408	0.0902504	0.430565
Wdtc1	4129.24	-0.0150032	0.0576755	-0.260132	0.794762	0.950415
Ddx42	4110.35	-0.0190695	0.0538181	-0.354332	0.72309	0.931899
Usp3	4101.31	-0.0818447	0.0610785	-1.33999	0.180248	0.582655
Gm26917	4084.05	0.056103	0.278527	0.201427	0.840365	0.963317
Vps26b	4120.35	0.0908076	0.0635147	1.42971	0.1528	0.546549
Lgals9	4123.05	0.147908	0.0849477	1.74116	0.0816549	0.407135
Ppp1r16b	4103.01	-0.00521795	0.0774834	-0.0673428	0.946309	0.987521
Alyref	4111.2	-0.0580943	0.0732453	-0.793147	0.427692	0.798981
Med14	4095.08	-0.0443557	0.0809598	-0.547873	0.583779	0.878985
Asf1b	4105.7	-0.168432	0.109753	-1.53464	0.124871	0.501567
Coro1c	4091.55	-0.143711	0.0586971	-2.44834	0.0143515	0.152072
Dcaf8	4086.4	0.118448	0.0538527	2.19948	0.0278437	0.227675
Retreg3	4072.81	-0.0777591	0.0505865	-1.53715	0.124256	0.501381
Ccnl1	4059.29	-0.0582631	0.0837888	-0.695357	0.486832	0.830384
Edc4	4066.28	0.109417	0.0454391	2.40799	0.0160406	0.16246
Psme2	4067.9	0.0725981	0.0795069	0.913104	0.361188	0.752175
Rab37	4075.66	0.301411	0.103009	2.92607	0.0034327	0.0624111
Ikbke	4046.66	-0.0459555	0.0770755	-0.59624	0.551015	0.864503
Cd5	4043.41	0.0329065	0.106818	0.30806	0.758037	0.939194
Cdipt	4042.01	-0.148586	0.0536053	-2.77186	0.00557364	0.0861523
Tuba1a	4054.78	-0.253332	0.118287	-2.14167	0.0322199	0.246603
Spcs2	4043.91	-0.0248024	0.0895996	-0.276814	0.781923	0.947744
Ppp4r3b	4030.27	-0.0435603	0.0522086	-0.834352	0.404083	0.785006
Mbtps1	4028.39	0.0329388	0.0554153	0.5944	0.552245	0.864972
Hif1a	4040	0.114747	0.0803834	1.4275	0.153435	0.547171
Nup50	4032.38	-0.0498398	0.0722134	-0.690174	0.490085	0.831207
Pglyrp2	4029.57	0.0329428	0.073526	0.448043	0.654122	0.904397
Tsn	4025.05	-0.00220113	0.0471226	-0.0467107	0.962744	0.991699
Wbp11	4026.75	0.0689259	0.0492796	1.39867	0.161912	0.55919
Mau2	4011.02	0.0431326	0.0691353	0.623887	0.532702	0.856123
Osbpl3	4010.95	-0.589943	0.0893749	-6.60076	4.09048e-11	1.66377e-08
Sipa1l1	4008.57	-0.0531368	0.0590805	-0.899397	0.368441	0.757638
Rnf4	4015.53	-0.00788407	0.0620287	-0.127103	0.898858	0.977124
Metap2	4010.63	-0.106498	0.0544226	-1.95687	0.0503628	0.31432
Kif18b	4024.55	-0.0239932	0.105166	-0.228147	0.819532	0.956817
Cip2a	4007.08	-0.131888	0.0682722	-1.9318	0.0533847	0.324976
Rnps1	4008.55	-0.0540533	0.0681596	-0.79304	0.427755	0.798981
Mad2l1	4014.36	-0.0325267	0.100761	-0.322809	0.74684	0.936706
Tug1	3982.84	0.0283749	0.0687653	0.412633	0.679875	0.914125
Copb1	3991.59	0.00837964	0.0601296	0.13936	0.889166	0.975197
Bin1	3991.05	-0.0242063	0.0649443	-0.372724	0.709354	0.925691
Limd1	3977.99	-0.0219421	0.0458442	-0.478623	0.632207	0.895379
Syne1	3961.94	0.187762	0.124915	1.50312	0.132808	0.515306
Dut	3986.53	-0.095184	0.0924811	-1.02923	0.303373	0.70941
Trpm7	3964.89	0.0319432	0.0816122	0.391403	0.6955	0.920851
Dpp8	3966.03	0.00406449	0.0559627	0.0726285	0.942102	0.986619
B230219D22Rik	3962.41	0.0959102	0.0654209	1.46605	0.142635	0.531389
Coa5	3968.32	0.00675661	0.0476077	0.141922	0.887141	0.974679
Dennd4b	3955.16	-0.016988	0.0622611	-0.272852	0.784967	0.948288
Trim26	3955.62	-0.0455342	0.0578395	-0.78725	0.431135	0.800423
Slco3a1	3964.57	0.0133733	0.0906925	0.147458	0.882771	0.974386
Fkbp1a	3965.96	-0.119144	0.06746	-1.76615	0.0773715	0.39493
Prkcsh	3962.36	-0.0699583	0.0543354	-1.28753	0.197911	0.602621
Banf1	3976.2	0.0929115	0.102195	0.909157	0.363268	0.753605
Tmed9	3964.28	0.0306343	0.07094	0.431833	0.665862	0.909245
Impdh1	3960.92	0.0916472	0.0620974	1.47586	0.139981	0.526631
Tmem127	3947.64	-0.0150562	0.0541934	-0.277824	0.781147	0.947547
Skp1a	3949.93	-0.118461	0.0831151	-1.42527	0.154079	0.547956
Ociad1	3943.37	-0.064611	0.0529233	-1.22084	0.222146	0.631016
Psma7	3949.9	-0.0307615	0.0744438	-0.413218	0.679447	0.914078
Zfc3h1	3925.04	0.119324	0.107447	1.11054	0.266768	0.678808
Ubp1	3929.89	0.0636771	0.0761358	0.836362	0.402951	0.783877
Uck2	3932.66	-0.240154	0.110076	-2.18172	0.0291302	0.23426
Abhd17a	3947.5	-0.0261568	0.0886605	-0.295022	0.767977	0.942563
Hprt	3938.15	-0.0692959	0.0650451	-1.06535	0.286717	0.696446
Gga1	3933.24	0.00582074	0.0485586	0.11987	0.904586	0.978534
Ptpn11	3930.05	0.0251615	0.0525388	0.478912	0.632001	0.895379
Kpna4	3923.92	-0.00147031	0.0618018	-0.0237907	0.98102	0.995353
Kansl1	3921.28	-0.103728	0.0586427	-1.76882	0.0769235	0.393349
Mrfap1	3938.19	-0.00209967	0.0868265	-0.0241824	0.980707	0.995258
Brd1	3917.76	-0.0739134	0.066073	-1.11866	0.263284	0.674393
Tnrc18	3912.29	-0.0298259	0.100755	-0.296025	0.767211	0.942563
Rnpepl1	3922.8	0.148242	0.0514024	2.88394	0.00392728	0.0688532
Cracr2a	3898.59	0.00366696	0.122533	0.0299263	0.976126	0.994214
Maf1	3924.43	-0.0276718	0.101368	-0.272984	0.784865	0.94826
Txlna	3919.78	0.0402599	0.0588529	0.684077	0.493927	0.833466
Gtf3c1	3910.62	0.0654479	0.0756534	0.865102	0.386983	0.771921
Nup214	3905.19	-0.036642	0.0932134	-0.393098	0.694247	0.920446
Il16	3912.53	0.000866612	0.0708828	0.012226	0.990245	0.996707
Nabp1	3894.28	-0.392511	0.0823078	-4.76882	1.85308e-06	0.000205222
Cnot3	3908.32	-0.0771548	0.0486348	-1.58641	0.112646	0.476987
Sec11c	3903.21	-0.00327049	0.0693291	-0.0471734	0.962375	0.991699
Ankfy1	3902.72	0.0120694	0.0498726	0.242005	0.808776	0.953677
Tmed10	3909.3	0.0496757	0.0526659	0.943223	0.345567	0.740431
Cdca4	3914.31	-0.0406945	0.0774049	-0.525735	0.599072	0.886091
Rasa1	3893.15	-0.151665	0.0734136	-2.0659	0.0388381	0.27223
Shc1	3902.51	0.023209	0.0447079	0.519126	0.603673	0.886382
Gigyf1	3882.93	0.0809448	0.110842	0.730271	0.465225	0.818776
Mcm3ap	3896.7	-0.0213146	0.0500752	-0.425652	0.670361	0.910661
Nedd4	3911.99	0.0854377	0.134743	0.634078	0.52603	0.851981
Cggbp1	3888.91	-0.152917	0.0496768	-3.07824	0.00208225	0.0438506
Nup62	3898.94	-0.116964	0.0812282	-1.43994	0.149884	0.541735
Arrdc1	3889.74	0.192189	0.0525362	3.65822	0.000253974	0.00982494
Rbm10	3892.05	-0.0469313	0.0648546	-0.723639	0.469288	0.821839
Atf7ip	3876.04	-0.040836	0.0756232	-0.539993	0.589202	0.880811
Sf3a2	3888.46	0.033332	0.0705831	0.472238	0.636757	0.895718
Brd9	3878.98	0.0324945	0.0474048	0.685469	0.493048	0.832701
Yme1l1	3876.82	-0.0513861	0.0695428	-0.738914	0.459959	0.81662
Fam111a	3877.12	-0.286704	0.0672899	-4.26073	2.03759e-05	0.00142892
Cc2d1b	3880.91	0.0951613	0.0486861	1.95459	0.0506315	0.315445
Ints7	3867.91	-0.0549898	0.0665855	-0.825853	0.408887	0.788492
Gbp2	3866.83	0.0286465	0.283982	0.100874	0.91965	0.981708
Fkbp4	3875.69	-0.0305632	0.0992295	-0.308005	0.758078	0.939194
Usp9x	3858.36	-0.0497732	0.100295	-0.496268	0.619706	0.890315
Heca	3855.74	0.0523508	0.0722577	0.724502	0.468757	0.821321
Ogfr	3860.93	-0.00532752	0.0656619	-0.0811357	0.935334	0.985138
Tpi1	3876.9	0.105726	0.114366	0.924449	0.355252	0.746751
Cyb5b	3855.74	-0.148724	0.0569175	-2.61297	0.00897592	0.116786
Hectd4	3834.61	0.106749	0.136513	0.781972	0.434231	0.801353
Zmynd11	3852.48	0.112501	0.0473335	2.37678	0.0174644	0.171464
Il18rap	3828.96	-0.515136	0.0871105	-5.91359	3.34737e-09	8.21465e-07
Entpd5	3852.28	0.0256795	0.0934819	0.2747	0.783547	0.947926
Zfp646	3844.29	-0.0703802	0.0564508	-1.24675	0.212488	0.618768
Tbc1d9b	3857.51	0.124462	0.0864278	1.44007	0.149847	0.541735
Ik	3846.6	0.0212746	0.0485846	0.437888	0.661467	0.907435
Pgam1	3853.83	-0.129202	0.0843813	-1.53117	0.125728	0.503619
Tomm70a	3850.65	0.0517215	0.0670071	0.77188	0.440185	0.804848
Ube2q1	3840.1	-0.0135192	0.0452785	-0.298579	0.765262	0.941974
Abl1	3839.98	0.0498768	0.0636776	0.783271	0.433468	0.801353
Tm9sf2	3834.04	-0.177133	0.0570428	-3.10526	0.00190113	0.040857
Clip1	3830.96	-0.055443	0.0455931	-1.21604	0.223971	0.632599
Slc35e1	3835.38	-0.100655	0.0543878	-1.8507	0.064213	0.357301
Vps4b	3838.2	-0.00329023	0.0562824	-0.0584594	0.953383	0.988896
Rnf167	3829.27	-0.119375	0.0476192	-2.50687	0.0121804	0.139278
Zdhhc8	3827.43	-0.0329572	0.0800085	-0.411921	0.680397	0.914262
Tspan13	3830.36	0.0428597	0.0503585	0.851092	0.394718	0.777745
Uqcrfs1	3839.23	0.0629788	0.0833596	0.755507	0.449945	0.811342
Bag1	3832.43	-0.017264	0.08808	-0.196004	0.844607	0.964042
Vps54	3802.46	-0.107865	0.0760737	-1.4179	0.156219	0.55075
Ubc	3818.12	-0.0536708	0.0658476	-0.815076	0.415029	0.790911
Pygb	3819.98	0.0385751	0.0646221	0.596933	0.550552	0.864497
Tmem229b	3811.02	-0.0645659	0.0616508	-1.04729	0.294968	0.701029
Tpp2	3798.67	-0.143907	0.0610877	-2.35574	0.0184858	0.177918
Celsr1	3795.85	0.109365	0.118315	0.924349	0.355305	0.746751
Inpp5b	3796.92	-0.168563	0.0506085	-3.33072	0.000866223	0.0234887
Suds3	3807.35	0.132103	0.0535267	2.46799	0.0135875	0.147111
Phf3	3795.21	-0.0170748	0.0634591	-0.269068	0.787877	0.949245
Ncapg	3802.6	-0.116977	0.06298	-1.85736	0.0632593	0.3546
Elmo1	3801.15	0.0584157	0.072364	0.807247	0.419524	0.793716
Fli1	3799.85	-0.148097	0.0589759	-2.51114	0.0120343	0.138213
Stat1	3790.01	0.12556	0.285513	0.439771	0.660103	0.906741
Osbpl8	3779.24	-0.119652	0.108554	-1.10223	0.270362	0.682535
R3hdm4	3794.81	0.183449	0.0446237	4.11102	3.93922e-05	0.00236619
Rin3	3784.73	-0.165163	0.0570479	-2.89516	0.00378961	0.0672679
Prr12	3784.24	0.196765	0.0997465	1.97265	0.048535	0.308671
Ptprs	3784.82	0.32778	0.13529	2.42279	0.0154019	0.158837
Csnk2a1	3778.83	0.0415216	0.0619663	0.670067	0.502815	0.83871
Ap3b1	3788.3	0.0788288	0.0603327	1.30657	0.19136	0.59487
Creb1	3778.43	0.015009	0.0598712	0.250688	0.802055	0.951428
Rbl2	3773.53	-0.0172304	0.106107	-0.162388	0.871001	0.97084
Ccar1	3767.21	-0.0492625	0.0699176	-0.70458	0.481072	0.827253
Anapc2	3773.19	0.0536467	0.0511075	1.04968	0.293864	0.700807
Ube3b	3768.73	0.0764549	0.0514207	1.48685	0.137054	0.522316
Gng2	3768.47	-0.0576351	0.0995103	-0.579187	0.562463	0.870413
Cdt1	3776.35	0.0274413	0.0899167	0.305185	0.760225	0.93954
Kif1c	3772.46	0.147006	0.0604494	2.43189	0.0150201	0.15642
Ankhd1	3753.17	0.052198	0.0764437	0.682829	0.494715	0.833527
Dynll2	3762.41	0.0829035	0.0647018	1.28132	0.200083	0.606005
Thoc2	3741.87	-0.0235927	0.11354	-0.207792	0.835391	0.961487
Ifi208	3759.19	-0.0199001	0.062788	-0.316941	0.751289	0.937307
Cers2	3758.09	0.012332	0.0476869	0.258603	0.795942	0.950415
Irgm1	3747.63	-0.121852	0.164402	-0.741186	0.45858	0.816438
Pcf11	3745.99	0.079391	0.0668792	1.18708	0.235195	0.645756
Atp5e	3759.36	0.0022319	0.092304	0.0241799	0.980709	0.995258
Bicdl1	3753.24	0.114	0.0455395	2.50332	0.0123034	0.139944
Hmmr	3762.06	-0.00582845	0.0894052	-0.0651914	0.948022	0.987936
Lrmp	3745.03	-0.0866484	0.0630202	-1.37493	0.169153	0.569257
Neurl3	3748.39	-0.189126	0.118317	-1.59846	0.10994	0.47156
Gosr2	3751.97	0.0597357	0.0669613	0.892093	0.372343	0.759845
Zfp592	3741.8	0.0563913	0.0577534	0.976417	0.328858	0.72709
Psma2	3751.37	-0.0693486	0.0984297	-0.704549	0.481091	0.827253
Ifi27	3743.65	-0.124885	0.113747	-1.09792	0.272239	0.683887
Cct6a	3738.94	-0.0775348	0.0764326	-1.01442	0.310382	0.714973
Mepce	3741.88	-0.0439007	0.0670888	-0.654368	0.512875	0.843626
Fip1l1	3731.08	-0.00278335	0.0473992	-0.0587215	0.953174	0.988896
Acp5	3729.16	-0.140305	0.110792	-1.26639	0.205375	0.611834
Cdk11b	3721.09	0.100126	0.0932444	1.0738	0.282913	0.693305
Spen	3709.19	-0.0105361	0.139456	-0.075551	0.939776	0.98616
Pip4k2a	3725.25	-0.00805317	0.0559533	-0.143927	0.885558	0.974662
Lpxn	3722.34	-0.15962	0.117227	-1.36164	0.173312	0.574453
Tspo	3730.18	-0.074219	0.10479	-0.708261	0.478783	0.827253
Rpl3-ps1	3724.3	0.0961676	0.0650176	1.4791	0.139113	0.525203
Cdkn2d	3728.56	-0.0604806	0.0938221	-0.64463	0.519167	0.847187
Strap	3725.84	0.0119762	0.0730443	0.163958	0.869764	0.97084
Ykt6	3716.05	-0.0471582	0.054459	-0.86594	0.386523	0.771529
Med15	3701.41	0.0935765	0.0722839	1.29457	0.195469	0.600024
Lgals3	3711.08	-1.13515	0.262371	-4.3265	1.51501e-05	0.00113514
Serp1	3706.37	-0.0976861	0.0742577	-1.3155	0.188342	0.590579
Psmb3	3706.5	-0.0957921	0.0809899	-1.18277	0.236902	0.64819
Mapkapk2	3709.81	0.142418	0.118304	1.20383	0.228655	0.637387
Xiap	3684.44	-0.0238251	0.0565815	-0.421075	0.6737	0.912312
Ap2s1	3696.73	-0.10469	0.104883	-0.998155	0.318204	0.720103
Chp1	3686.98	0.00242402	0.0553158	0.0438214	0.965047	0.992301
Reep4	3695.86	0.0829084	0.0744321	1.11388	0.265331	0.676442
Ddx58	3684.35	0.0615552	0.0530102	1.1612	0.245562	0.65743
Mprip	3681.76	-0.15294	0.0638138	-2.39666	0.0165451	0.165521
Mlf2	3697.4	0.0910456	0.0961785	0.946631	0.343827	0.739241
Kif4	3688.78	-0.0567855	0.0742664	-0.764618	0.444499	0.806737
Taf1	3665.51	-0.0507631	0.086152	-0.589227	0.555709	0.866834
Axin1	3675.01	0.0445116	0.0446649	0.996567	0.318975	0.720146
Sh3gl1	3680.94	0.0647754	0.0641322	1.01003	0.312481	0.716379
Paxip1	3674.47	0.0194231	0.0692259	0.280576	0.779036	0.946745
Ensa	3678.14	0.13389	0.0543483	2.46355	0.0137567	0.148364
Dnmt3a	3658.5	0.0370449	0.0917762	0.403644	0.686474	0.916673
Aars	3680.03	0.000407366	0.0899914	0.00452672	0.996388	0.998817
Irf9	3659.41	-0.0616744	0.0944246	-0.65316	0.513653	0.843655
Gm10282	3661.46	-0.149883	0.109266	-1.37173	0.170147	0.570336
Zdhhc20	3655.04	0.0510144	0.0780825	0.65334	0.513537	0.843655
Uqcrc2	3668.72	0.0522443	0.0648224	0.80596	0.420266	0.794049
Ubqln1	3670.73	0.0235972	0.0689918	0.342029	0.732329	0.934179
Nvl	3647.39	-0.220681	0.116328	-1.89706	0.0578199	0.340411
Atp6v0a2	3658.66	-0.0833392	0.0498772	-1.67089	0.0947437	0.441232
Pdpk1	3653.24	0.0658759	0.0719453	0.91564	0.359856	0.750746
Ranbp3	3657.64	-0.0287093	0.0441847	-0.649756	0.51585	0.844891
Nol7	3663.6	0.0860636	0.0704917	1.2209	0.222122	0.631016
Man2a2	3638.08	0.107044	0.138143	0.774876	0.438413	0.80325
Abi1	3647.64	-0.0183553	0.0578685	-0.31719	0.751099	0.937307
Taf10	3661.33	-0.119492	0.107881	-1.10763	0.268023	0.680139
Abce1	3647.29	0.0110904	0.09454	0.117309	0.906615	0.978746
Mtmr1	3640.81	-0.05608	0.0578533	-0.969348	0.332371	0.730039
Rhoh	3636.84	-0.0718088	0.0530106	-1.35461	0.175541	0.576406
Gsk3b	3632.12	-0.0435317	0.0912462	-0.47708	0.633305	0.895395
Cdk9	3637.89	-0.0353814	0.0588035	-0.601689	0.547381	0.863915
Aff3	3621.34	-0.0278293	0.151064	-0.184222	0.85384	0.966775
Sae1	3643.54	-0.0642898	0.0701911	-0.915926	0.359705	0.750746
Nadk	3637.16	0.0384658	0.058632	0.656054	0.511789	0.843063
Zdhhc3	3637.09	0.0500747	0.0437106	1.1456	0.251962	0.664739
Aup1	3640.35	0.14557	0.0586115	2.48364	0.0130046	0.143823
Psma1	3640.97	-0.0721028	0.0829825	-0.868892	0.384906	0.76938
Zfp740	3628.84	-0.00248144	0.0597998	-0.0414957	0.966901	0.992762
Mfng	3623.03	-0.0841904	0.0489249	-1.72081	0.0852855	0.417656
Sec31a	3620.03	-0.041467	0.0513844	-0.806996	0.419669	0.793774
Dpf2	3628.85	0.116348	0.0624453	1.86319	0.0624354	0.353271
Shmt2	3629.86	0.0205931	0.0986307	0.20879	0.834612	0.961088
Tor4a	3623.29	-0.00211797	0.0596277	-0.0355199	0.971665	0.993045
Midn	3614.71	0.0428372	0.0535723	0.799614	0.423935	0.795772
Tnpo2	3613.31	0.0682269	0.0628787	1.08506	0.277897	0.688624
Psmd13	3618.52	-0.0826573	0.0623666	-1.32535	0.185057	0.586917
Tlk1	3614.99	0.111323	0.0436616	2.54967	0.0107824	0.129463
Trim27	3622.6	-0.00784281	0.0811506	-0.0966451	0.923008	0.983109
Knl1	3601	-0.147507	0.117008	-1.26066	0.20743	0.613657
Tcf20	3600.59	-0.0584813	0.0627279	-0.932302	0.351181	0.743787
Sft2d2	3609.08	0.0501687	0.0532743	0.941706	0.346343	0.740725
Scap	3604.45	-0.0575729	0.0573745	-1.00346	0.315641	0.718494
Rnf220	3608.71	0.0780203	0.0561885	1.38855	0.164971	0.56461
Pag1	3587.1	-0.218627	0.149177	-1.46556	0.142769	0.531389
Ckap2l	3609.18	-0.0957144	0.0719396	-1.33048	0.183359	0.585138
Ccdc82	3587.92	-0.0391117	0.104023	-0.375992	0.706923	0.925256
Tcerg1	3597.37	-0.0640044	0.0745494	-0.858551	0.390589	0.773996
Ppp5c	3603.56	0.0628776	0.0623669	1.00819	0.313364	0.716796
Med24	3598.5	0.0735584	0.048931	1.50331	0.13276	0.515258
Elob	3610.76	-0.0456748	0.115155	-0.396636	0.691636	0.919678
Cpsf7	3587.6	0.0816244	0.0688909	1.18483	0.236083	0.647069
Lrrc59	3598.67	-0.10922	0.0744856	-1.46632	0.142561	0.531284
Preb	3591.96	0.0418641	0.0457381	0.915301	0.360034	0.750942
Emg1	3599.85	0.0980004	0.0778765	1.25841	0.208244	0.614762
Me2	3595.74	-0.131503	0.0956954	-1.37418	0.169385	0.569257
Plekho2	3594.11	-0.0235312	0.0991859	-0.237244	0.812468	0.955304
Mms19	3581.69	0.101276	0.0550472	1.8398	0.0657972	0.361041
Tmem71	3569.78	0.0124771	0.101637	0.122761	0.902296	0.978246
Ifnar2	3580.17	-0.00839446	0.0526148	-0.159546	0.873239	0.971443
Ncbp1	3582.91	-0.0904062	0.0719079	-1.25725	0.208663	0.615148
Dnajc8	3577.26	-0.0508006	0.0777721	-0.653198	0.513629	0.843655
Qrich1	3570.22	-0.0570285	0.0563334	-1.01234	0.311376	0.715429
Cmip	3563.94	0.000628299	0.0620614	0.0101238	0.991922	0.997293
Srf	3574.64	0.0485072	0.0764076	0.634848	0.525527	0.851956
Chd7	3559.17	-0.264373	0.0865293	-3.0553	0.00224834	0.0459877
Ctsc	3573.56	0.0548375	0.0526146	1.04225	0.297297	0.703627
Tmc8	3568.86	0.0319504	0.0417836	0.764663	0.444472	0.806737
Hdgfl2	3570.39	0.0336685	0.0572288	0.588314	0.556322	0.867222
Gprin3	3532.99	-0.291398	0.159622	-1.82555	0.0679177	0.367914
Tut7	3551.26	-0.0498477	0.0746551	-0.667706	0.504321	0.839499
Smg7	3548.26	-0.120228	0.0731556	-1.64346	0.100289	0.450948
Hipk3	3560.23	0.0627557	0.0707386	0.887149	0.374999	0.761565
Gpx4	3568.38	0.0419707	0.116987	0.358763	0.719772	0.929994
Gabarap	3557.3	-0.0389188	0.108243	-0.359549	0.719185	0.929375
Pik3cg	3561.67	-0.101366	0.0909288	-1.11478	0.264945	0.676143
Rnf20	3546.79	0.0732657	0.0641236	1.14257	0.253217	0.665434
Nfx1	3548.64	0.0679363	0.0430268	1.57893	0.114352	0.481206
Clptm1	3550.61	-0.0655751	0.0626799	-1.04619	0.295473	0.701378
Trabd	3553.1	0.0341809	0.0715244	0.477891	0.632728	0.895379
Msh6	3539.68	-0.12814	0.0686831	-1.86567	0.0620869	0.352448
Zmynd8	3537.12	-0.270367	0.0483982	-5.58632	2.31937e-08	4.62412e-06
Fam53b	3535.49	-0.109747	0.0665681	-1.64864	0.0992211	0.448797
Elmo2	3543.35	-0.00478749	0.0808937	-0.0591825	0.952807	0.988896
Adss	3537.51	-0.034967	0.0584015	-0.598734	0.54935	0.864436
Lax1	3515.31	-0.239747	0.0844329	-2.8395	0.0045184	0.0754976
Kdm3a	3513.47	-0.185103	0.0781604	-2.36824	0.0178727	0.174152
Naa50	3527.73	-0.0652496	0.0764478	-0.853518	0.393372	0.776705
Tmem173	3530.26	-0.019958	0.0839516	-0.237732	0.812089	0.955304
Trap1	3524.86	-0.0277185	0.0915325	-0.302826	0.762022	0.940638
Aip	3536.7	0.181158	0.0846792	2.13935	0.0324075	0.246713
Man1a	3521.83	-0.0299637	0.0577797	-0.518585	0.60405	0.886388
Mbd3	3529.5	0.0386254	0.0796782	0.484767	0.627841	0.894182
Sik3	3520.03	0.161531	0.0750791	2.15148	0.0314384	0.243106
Xab2	3523.18	0.0850114	0.0508744	1.67101	0.0947203	0.441232
Clk1	3503.94	-0.118349	0.0825691	-1.43334	0.151761	0.544756
Eif2s3x	3523.01	0.112096	0.0812592	1.37949	0.167744	0.566975
Gspt1	3512.23	-0.0248034	0.0652597	-0.380073	0.703891	0.923558
Btg2	3510.63	-0.0343551	0.0855167	-0.401736	0.687878	0.917318
Parp10	3510.76	0.0395856	0.0919056	0.43072	0.666672	0.909245
U2surp	3498.74	0.014863	0.0766508	0.193905	0.84625	0.964163
Mdn1	3477.57	0.122759	0.303746	0.40415	0.686102	0.916668
Mapk3	3523.26	0.31041	0.091198	3.40369	0.000664817	0.0192756
Rtf1	3499.9	0.0962754	0.0536458	1.79465	0.0727097	0.382377
Fbxo5	3504.01	-0.152694	0.0652125	-2.34148	0.0192076	0.18202
Tex261	3501.52	-0.0169283	0.0544846	-0.310699	0.75603	0.939093
Sec16a	3487	-0.107394	0.0877558	-1.22379	0.221033	0.630586
Rbm22	3493.77	0.0215531	0.0524735	0.410742	0.681262	0.91461
Pten	3488.54	-0.136218	0.0951371	-1.43181	0.152199	0.545082
Copz1	3495.73	-0.0556771	0.0728002	-0.764794	0.444394	0.806737
Gnas	3500.81	-0.00808976	0.075267	-0.107481	0.914407	0.980677
Mgat1	3485.46	-0.17939	0.069066	-2.59737	0.00939417	0.120466
Ube4a	3476.37	0.116734	0.0875991	1.33259	0.182665	0.584243
Ddit4	3496.06	0.269235	0.0824606	3.26502	0.00109457	0.0276033
Srgap2	3472.06	-0.0921226	0.071714	-1.28458	0.198938	0.603727
Slc7a1	3476.48	-0.0508272	0.133555	-0.380571	0.703522	0.923541
Vps13d	3469.04	0.0203448	0.0998178	0.20382	0.838494	0.962339
Casc3	3472.97	0.00503107	0.0570785	0.0881429	0.929763	0.983964
Nek2	3489.31	0.0468568	0.0922578	0.50789	0.611531	0.888277
Plac8	3482.98	-0.086223	0.168796	-0.510813	0.609482	0.88777
Wdr33	3472.18	-0.00810801	0.0595195	-0.136225	0.891644	0.975893
S100a11	3486.96	-0.0701183	0.143281	-0.489375	0.624576	0.89309
Spcs3	3471.3	-0.0528571	0.0586286	-0.901558	0.367292	0.757024
Trappc10	3471.66	0.038263	0.0585875	0.653091	0.513698	0.843655
Kat7	3476.7	0.0523777	0.0614806	0.851939	0.394248	0.777141
E2f8	3470.01	-0.141983	0.0809851	-1.7532	0.0795678	0.402201
Ahcy	3481.07	-0.1403	0.101157	-1.38695	0.165457	0.564708
Sin3b	3480.88	-0.0284585	0.0813513	-0.349822	0.726472	0.932505
Ncln	3468.08	0.140775	0.0698037	2.01672	0.0437248	0.290736
Kntc1	3471.8	-0.155401	0.103805	-1.49705	0.13438	0.518369
Usp47	3469.32	0.0362308	0.0598289	0.605573	0.544798	0.863188
Gbp7	3464.66	0.00287888	0.0814405	0.0353495	0.971801	0.993045
Wbp1l	3463.28	-0.0538017	0.0540799	-0.994856	0.319806	0.720373
Npepl1	3466.86	0.094536	0.0615648	1.53555	0.124648	0.501381
Zfpm1	3470.68	0.0346375	0.0875348	0.395699	0.692327	0.919722
Vps16	3461.46	0.148444	0.050471	2.94118	0.00326967	0.0601277
Crlf2	3468.6	-0.022265	0.0919793	-0.242065	0.80873	0.953677
Sntb2	3452.42	0.084324	0.102167	0.825354	0.409171	0.788541
Knstrn	3469.87	0.0321066	0.0827269	0.388104	0.697939	0.921685
Polr2b	3457.83	-0.116244	0.0619648	-1.87597	0.060659	0.34897
Stx16	3439.32	0.0213186	0.118299	0.180208	0.856989	0.966817
Nudt21	3461.26	-0.0482045	0.0701245	-0.687414	0.491822	0.831838
Smarca2	3441.01	-0.0305088	0.0897658	-0.339872	0.733953	0.934325
Itgb3	3438.96	0.176134	0.144709	1.21716	0.223542	0.632423
Tapt1	3441.2	-0.0715231	0.0693911	-1.03072	0.30267	0.709269
Psmc1	3458.73	-0.0164942	0.0742276	-0.222212	0.824149	0.957884
Pip4k2b	3446.03	-0.0299381	0.051514	-0.581165	0.561129	0.86988
Gzma	3456	-0.308086	0.54375	-0.566594	0.57099	0.875216
Zyg11b	3447.29	0.108021	0.0566706	1.90613	0.0566339	0.336214
Naa15	3439.34	-0.0734815	0.0694201	-1.0585	0.289825	0.697686
Pkd1	3430.83	0.17763	0.138988	1.27802	0.201242	0.607258
Wac	3445.49	-0.0561719	0.0513476	-1.09395	0.273976	0.685348
Flt3l	3426.91	0.193586	0.137954	1.40326	0.160539	0.557543
Sfswap	3436.69	0.0671587	0.0735473	0.913136	0.361171	0.752175
Akirin1	3446.62	-0.0557966	0.0845478	-0.659941	0.509291	0.841587
Ube2l3	3448.34	-0.100602	0.0756284	-1.33022	0.183446	0.585154
Vps28	3450.25	0.0986885	0.073918	1.33511	0.181841	0.58317
Sdhb	3456.2	0.0565388	0.0988578	0.57192	0.567376	0.873718
Tnfsf8	3419.74	-0.0546894	0.116991	-0.467467	0.640166	0.897359
Selenof	3450.63	-0.0479433	0.0914766	-0.524104	0.600206	0.886091
Zfp706	3439.77	-0.0741818	0.063957	-1.15987	0.246102	0.658554
Irf2bp2	3449.04	0.00576764	0.0965188	0.0597567	0.952349	0.988896
Ubash3a	3443.14	-0.0271509	0.071168	-0.381503	0.70283	0.923476
Ralgapb	3431.3	0.0367108	0.079653	0.460884	0.644882	0.899961
Sub1	3439.74	-0.227479	0.0928791	-2.44919	0.0143178	0.152072
Slc12a7	3432.02	0.25721	0.100211	2.56668	0.0102679	0.126345
Mbd6	3429.04	0.215049	0.090594	2.37377	0.0176076	0.172276
Pds5b	3427.09	0.0346203	0.069478	0.498291	0.618279	0.890042
Gas5	3433.78	0.167915	0.0622353	2.69807	0.00697423	0.098693
Exosc10	3433.75	0.0910264	0.0637793	1.42721	0.15352	0.547208
Rtn4	3429.31	-0.0879111	0.0658976	-1.33406	0.182185	0.583489
Lims1	3432.16	0.130428	0.0547933	2.38036	0.0172956	0.170277
Adipor1	3433.88	0.149072	0.0817346	1.82385	0.0681749	0.368547
Gatad2b	3412.05	-0.0245503	0.0869297	-0.282415	0.777625	0.946339
Rap1a	3419.68	-0.133371	0.0776811	-1.7169	0.0859967	0.419259
Rab14	3414.87	-0.00248437	0.0509755	-0.0487365	0.961129	0.991208
Sh3bp5	3416.2	0.0888197	0.108551	0.818229	0.413226	0.790259
Rab21	3417.12	0.107544	0.0459051	2.34275	0.0191423	0.181673
Agps	3416.36	-0.0251036	0.0586229	-0.428222	0.668489	0.909549
Calu	3420.51	0.0759525	0.0652536	1.16396	0.24444	0.655885
Fbl	3416.55	0.088818	0.100931	0.879985	0.378867	0.764045
Nmt1	3420.14	-0.00314091	0.0729797	-0.0430381	0.965671	0.992524
Rfc1	3408.1	-0.151803	0.066857	-2.27056	0.0231736	0.20478
Ccr2	3405.26	-0.773342	0.291127	-2.65637	0.00789858	0.107864
Gsk3a	3415.92	0.0811562	0.0637523	1.27299	0.203021	0.608849
Ccar2	3408.43	0.0509927	0.0534863	0.953378	0.340398	0.736685
Dlst	3399.91	-0.0572612	0.0578491	-0.989837	0.322254	0.722013
Galnt6	3395.88	0.0338652	0.108957	0.310812	0.755944	0.939093
Plekha2	3406.76	-0.000907073	0.0577618	-0.0157037	0.987471	0.996096
Lonp2	3403.46	-0.00425576	0.0667433	-0.063763	0.949159	0.988032
Derl1	3396.59	-0.0422889	0.0589118	-0.717833	0.47286	0.823399
Stard7	3395.57	0.00326537	0.0554436	0.0588954	0.953035	0.988896
Gpsm3	3398.61	0.110632	0.0795416	1.39087	0.164266	0.563762
Cyc1	3400.67	0.0332724	0.0759788	0.437918	0.661446	0.907435
Smg6	3393.61	0.0827055	0.0575076	1.43817	0.150387	0.542124
Cirbp	3382.09	0.0836383	0.0744735	1.12306	0.261411	0.672956
Nipal3	3384.06	-0.181017	0.0835524	-2.16651	0.0302722	0.238539
Slc35a4	3391.47	-0.0472871	0.0795795	-0.594212	0.55237	0.864972
Ylpm1	3367.28	0.0438829	0.123607	0.355019	0.722575	0.931671
AI467606	3379.72	-0.0312584	0.064326	-0.485936	0.627012	0.893716
Pgls	3390.88	0.0461706	0.0993403	0.464772	0.642095	0.898276
Ubxn1	3385.6	0.0827807	0.0921302	0.898519	0.368909	0.757696
Nploc4	3380.82	0.023201	0.0567245	0.409013	0.68253	0.915864
Ipo9	3373.2	-0.066855	0.0579397	-1.15387	0.248552	0.661629
Tnip1	3376.32	-0.0733435	0.0858551	-0.854271	0.392955	0.776527
Vps13a	3357.79	0.0571712	0.12657	0.451696	0.651488	0.904184
Cd226	3376.58	0.0788871	0.0827833	0.952934	0.340623	0.736947
Prpf19	3373.15	-0.00526669	0.0776456	-0.0678298	0.945921	0.987521
Mef2a	3360.08	-0.169515	0.0708857	-2.39139	0.0167846	0.166979
Itga4	3349.33	0.257491	0.164922	1.56129	0.118456	0.48863
D16Ertd472e	3356.89	-0.1421	0.0553475	-2.56741	0.0102461	0.126345
Ric8a	3359.79	-0.0537504	0.0733537	-0.732757	0.463706	0.818487
Adipor2	3357.07	-0.108806	0.0552087	-1.97081	0.0487459	0.309107
Rbm38	3364.14	0.116588	0.113024	1.03154	0.302289	0.708494
Foxo3	3358.85	0.0249061	0.0764207	0.325908	0.744494	0.936518
Sbno2	3348.35	-0.00593283	0.0661009	-0.089754	0.928483	0.983954
Irgm2	3348.73	0.0140101	0.178207	0.0786169	0.937337	0.985754
Dnajc15	3355.07	-0.0320298	0.0833649	-0.384213	0.700821	0.923102
Dpp3	3353.45	0.00920108	0.0480727	0.191399	0.848213	0.965421
Ube4b	3349.36	0.0191177	0.0561271	0.340614	0.733394	0.934306
Slc25a51	3344.79	0.0249429	0.0481944	0.517548	0.604774	0.886641
Bhlhe40	3356.78	0.260042	0.129467	2.00855	0.0445849	0.294151
Jmjd1c	3332.35	-0.147595	0.0941486	-1.56768	0.116955	0.486557
Nelfb	3345.97	-0.00447461	0.0575467	-0.0777562	0.938022	0.985875
Chd1	3331.58	0.00706211	0.0796597	0.0886534	0.929357	0.983964
Tox4	3335.97	-0.0284623	0.0508308	-0.559942	0.575519	0.875611
Cep97	3324.91	0.210361	0.124709	1.68682	0.0916381	0.434445
Arhgap27	3331.97	0.0263788	0.0465311	0.566907	0.570778	0.875146
Cyhr1	3323.14	-0.0350493	0.0829368	-0.422602	0.672586	0.911769
Dedd2	3328.05	0.000661397	0.0812449	0.00814078	0.993505	0.99794
Hmgcr	3324.55	-0.113481	0.0808863	-1.40296	0.160627	0.557594
Malt1	3314.42	0.0162415	0.0870351	0.186608	0.851968	0.966346
Zer1	3319.82	0.196794	0.0576828	3.41165	0.000645701	0.0188365
Nsun2	3322.54	0.020384	0.0930669	0.219025	0.82663	0.958303
Azin1	3318.09	-0.0714946	0.063892	-1.11899	0.263144	0.674393
Rcor1	3313.03	0.0523546	0.0534134	0.980178	0.326998	0.726192
Rtf2	3322.5	0.0744894	0.0957456	0.777992	0.436574	0.802243
Timeless	3314.09	-0.0988574	0.078777	-1.2549	0.209514	0.615612
Mkrn1	3318.33	-0.00977398	0.0709137	-0.137829	0.890375	0.97548
Nod1	3307.9	-0.0348415	0.0634415	-0.54919	0.582875	0.878819
Dyrk1a	3309.68	0.0363024	0.06078	0.597275	0.550324	0.864497
[truncated: 12,240 more rows]
