# Supplementary material for: Cytochrome c oxidase dependent respiration is essential for T cell activation, proliferation and memory formation
Source: Nat Commun. 2025 Dec 4;16:10898. doi: 10.1038/s41467-025-65910-w (PMC12678437; doi:10.1038/s41467-025-65910-w)
Supplement: Supplementary file 4 — Supplementary Data 2 [file 41467_2025_65910_MOESM4_ESM.xlsx]

## Sheet: turquoise_module
ONTOLOGY	ID	Description	GeneRatio	BgRatio	pvalue	p.adjust	qvalue	geneID	Count
BP	GO:0006397	mRNA processing	114/2090	496/28891	4.96374e-29	2.89932e-25	2.13336e-25	Pabpc1/Srrm2/Ptbp1/Hnrnpl/Pcbp1/Hnrnpm/Sfpq/Hnrnpc/Rbm39/Thrap3/U2af2/C1qbp/Sf3b2/Eftud2/Snrnp70/Papola/Khsrp/Rbm25/Srrm1/Khdrbs1/Ptbp3/Rnps1/Ddx17/Celf2/Sympk/Dazap1/Eif4a3/Slbp/Puf60/Sf3a1/Ahcyl1/Rrp1b/Wbp11/Cpsf1/Sf3b4/Rbm38/Nudt21/Sltm/Ik/Rbm8a/Snrpd3/Safb2/Phf5a/Sf3a2/Wdr33/Prmt7/Phrf1/Fmr1/Fxr1/Scaf1/Scaf4/Fip1l1/Rnmt/Dhx38/Ecd/Cdk13/Pnpt1/Rbm14/Rbm15/Rbm15b/Casc3/Grsf1/Zc3h13/Cactin/Zmat2/…	114
BP	GO:0006338	chromatin remodeling	109/2090	489/28891	1.28199e-26	3.74407e-23	2.75494e-23	Mybbp1a/Dnmt1/Chd4/Sfpq/Trim28/Hcfc1/Mcm2/Noc2l/Baz1b/Tpr/Suz12/Brd2/Lmnb1/Mta2/Hjurp/Ogt/Smarcc1/Dot1l/Smarca4/Arid1a/Exosc10/Brd4/Supt5/Gatad2a/Mta1/Usp15/Trim27/Pbrm1/Yy1/Kmt2a/Dnajc9/Uchl5/Rlim/Paxip1/Smarcc2/Prmt7/Phf10/Msl2/Kat6a/Chaf1a/Kdm2b/Actl6a/Hdac3/Rbm15/Rbm15b/Suv39h1/Kat2a/Dpf2/Axin1/Phf2/Mcrs1/Ino80/Ctr9/Gsk3a/Jmjd6/Brd3/Setd7/Ehmt1/Asf1b/Kansl1/Arid1b/Tti1/Kansl3/Atf7ip/Rsf1/Lmnb…	109
BP	GO:0008380	RNA splicing	97/2090	449/28891	9.27893e-23	1.80661e-19	1.32933e-19	Pabpc1/Srrm2/Ptbp1/Hnrnpl/Hnrnpm/Sfpq/Hnrnpc/Rbm39/Thrap3/U2af2/C1qbp/Sf3b2/Eftud2/Snrnp70/Khsrp/Polr2a/Rbm25/Srrm1/Khdrbs1/Ptbp3/Rnps1/Slc38a2/Ddx17/Celf2/Dazap1/Eif4a3/Puf60/Trrap/Sf3a1/Rrp1b/Wbp11/Sf3b4/Rbm38/Ik/Rtraf/Rbm8a/Snrpd3/Ccnl1/Phf5a/Clk1/Sf3a2/Prmt7/Fmr1/Fxr1/Scaf1/Atxn7l3/Dhx38/Ecd/Cdk13/Rbm14/Rbm15/Rbm15b/Casc3/Kat2a/Grsf1/Zc3h13/Cactin/Zmat2/Rbm22/Cwc15/Jmjd6/Snw1/Lsm2/Rbm19/Prpf3…	97
BP	GO:0000375	RNA splicing, via transesterification reactions	70/2090	304/28891	2.34e-18	2.27799e-15	1.67618e-15	Srrm2/Ptbp1/Hnrnpl/Hnrnpm/Sfpq/Hnrnpc/Rbm39/Thrap3/U2af2/C1qbp/Sf3b2/Eftud2/Snrnp70/Rbm25/Srrm1/Khdrbs1/Ptbp3/Rnps1/Ddx17/Celf2/Dazap1/Eif4a3/Puf60/Sf3a1/Sf3b4/Ik/Rbm8a/Snrpd3/Phf5a/Sf3a2/Prmt7/Fmr1/Fxr1/Dhx38/Cdk13/Rbm14/Rbm15/Rbm15b/Casc3/Cactin/Zmat2/Rbm22/Cwc15/Jmjd6/Snw1/Lsm2/Rbm19/Prpf39/Isy1/Tia1/Crnkl1/Tfip11/Zcrb1/Slu7/Wbp4/Dcps/Srsf4/Mettl3/Zfp64/Coil/Gemin2/Ptbp2/Mfap1a/Fra10ac1/Pcbp4/…	70
BP	GO:0000377	RNA splicing, via transesterification reactions with bulged adenosine as nucleophile	70/2090	304/28891	2.34e-18	2.27799e-15	1.67618e-15	Srrm2/Ptbp1/Hnrnpl/Hnrnpm/Sfpq/Hnrnpc/Rbm39/Thrap3/U2af2/C1qbp/Sf3b2/Eftud2/Snrnp70/Rbm25/Srrm1/Khdrbs1/Ptbp3/Rnps1/Ddx17/Celf2/Dazap1/Eif4a3/Puf60/Sf3a1/Sf3b4/Ik/Rbm8a/Snrpd3/Phf5a/Sf3a2/Prmt7/Fmr1/Fxr1/Dhx38/Cdk13/Rbm14/Rbm15/Rbm15b/Casc3/Cactin/Zmat2/Rbm22/Cwc15/Jmjd6/Snw1/Lsm2/Rbm19/Prpf39/Isy1/Tia1/Crnkl1/Tfip11/Zcrb1/Slu7/Wbp4/Dcps/Srsf4/Mettl3/Zfp64/Coil/Gemin2/Ptbp2/Mfap1a/Fra10ac1/Pcbp4/…	70
BP	GO:0000398	mRNA splicing, via spliceosome	70/2090	304/28891	2.34e-18	2.27799e-15	1.67618e-15	Srrm2/Ptbp1/Hnrnpl/Hnrnpm/Sfpq/Hnrnpc/Rbm39/Thrap3/U2af2/C1qbp/Sf3b2/Eftud2/Snrnp70/Rbm25/Srrm1/Khdrbs1/Ptbp3/Rnps1/Ddx17/Celf2/Dazap1/Eif4a3/Puf60/Sf3a1/Sf3b4/Ik/Rbm8a/Snrpd3/Phf5a/Sf3a2/Prmt7/Fmr1/Fxr1/Dhx38/Cdk13/Rbm14/Rbm15/Rbm15b/Casc3/Cactin/Zmat2/Rbm22/Cwc15/Jmjd6/Snw1/Lsm2/Rbm19/Prpf39/Isy1/Tia1/Crnkl1/Tfip11/Zcrb1/Slu7/Wbp4/Dcps/Srsf4/Mettl3/Zfp64/Coil/Gemin2/Ptbp2/Mfap1a/Fra10ac1/Pcbp4/…	70
BP	GO:0043161	proteasome-mediated ubiquitin-dependent protein catabolic process	88/2090	451/28891	8.96345e-18	6.7322e-15	4.95365e-15	Canx/Hsp90b1/Pcbp2/Ogt/Psmd8/Smarcc1/Psmc3/Bag6/Psmd1/Ctnnb1/Akt1/Psmc4/Psmc5/Ubqln1/Rnf10/Psma5/Mta1/Rnf187/Cul3/Psmd4/Csnk1d/Usp19/Uchl5/Tbl1x/Usp5/Ubqln4/Zfp598/Rmnd5a/Rbx1/Ubxn1/Bcap31/Pcnp/Mdm2/Ube2j1/Herc2/Ube2j2/Fbxl14/Aup1/Cd2ap/Znrf2/Ube2k/Axin1/Fem1a/Man1a2/Gsk3a/Herpud1/Os9/Klhdc3/Sec61b/Ubxn2a/Gabarap/Ubxn7/Man1b1/Desi1/Agap3/Tlk2/Apc/Ubr3/Derl2/Psmf1/Ambra1/Rnf14/Wwp2/Selenos/Ubqln2/…	88
BP	GO:1903311	regulation of mRNA metabolic process	69/2090	304/28891	9.22062e-18	6.7322e-15	4.95365e-15	Pabpc1/Hnrnpab/Ptbp1/Hnrnpa0/Hnrnpl/Larp1/Hnrnpc/Pabpc4/Rbm39/Thrap3/U2af2/C1qbp/Snrnp70/Papola/Khsrp/Rbm25/Eif4enif1/Srrm1/Khdrbs1/Ptbp3/Rnps1/Ddx17/Ago2/Celf2/Dazap1/Eif4a3/Puf60/Upf1/Ahcyl1/Zc3h12d/Sf3b4/Rbm38/Sltm/Rbm8a/Safb2/Fmr1/Fxr1/Fip1l1/Pum1/Pnpt1/Rbm15/Rbm15b/Casc3/Angel2/Cdc73/Polr2g/Cnot3/Jmjd6/Snw1/Patl1/Ikbke/Dcp1a/Tut7/Tia1/Ptcd2/Fto/Mlh1/Dcps/Rc3h2/Srsf4/Leo1/Brf1/Mettl3/Lsm1/Dhx…	69
BP	GO:0044772	mitotic cell cycle phase transition	88/2090	454/28891	1.38162e-17	8.9667e-15	6.59783e-15	Eif4g1/Rcc2/Phb2/Psme1/Tpr/Lmnb1/Rad21/Ccng1/Smarcc1/Smarca4/Calm3/Ankrd17/Akt1/Dgkz/Arid1a/Pole/Nfatc1/Brd4/Tgfb1/Zc3h12d/Rbm38/Cul3/Pbrm1/Ik/Zwint/Smarcc2/Phf10/Cdc25a/Clspn/Mdm2/Ecd/Cks1b/Rbl1/Clasp1/Actl6a/Eif4ebp1/Dpf2/Tcf19/Cdkn1a/Arpp19/Ctc1/Ino80/Cdc73/Cdc7/Usp37/Mepce/Mtbp/Arid1b/Rbbp8/Dlg1/Uimc1/Pten/Crebbp/Apc/Rptor/Ctdp1/Ambra1/Kat14/Pkd1/Rb1/Smarcd1/Phf8/Ube2a/Zfp655/Hinfp/Haspin/Bcl…	88
BP	GO:0040029	epigenetic regulation of gene expression	56/2090	230/28891	4.21798e-16	2.46372e-13	1.81284e-13	Dnmt1/Trim28/Hcfc1/Noc2l/Tpr/Suz12/Lmnb1/Ogt/Smarca4/Exosc10/Mta1/Trim27/Kmt2a/Rlim/Prmt7/Msl2/Rbm15/Rbm15b/Suv39h1/Axin1/Phf2/Mcrs1/Ctr9/Gsk3a/Ehmt1/Kansl1/Kansl3/Atf7ip/Lmnb2/Gnas/Nr3c1/Jarid2/Arid4a/Rb1/Smarcd1/Bahd1/Setd1a/Rnf168/Phf8/Arid4b/Bend3/Zfp335/Mettl3/Epc1/Phf19/Vps72/Znhit1/Kat8/Hdac6/Usp21/H1f0/N6amt1/Rnf8/Lcor/Bcl6/Jpx	56
BP	GO:0016570	histone modification	46/2090	164/28891	5.67226e-16	3.01197e-13	2.21625e-13	Mybbp1a/Hcfc1/Noc2l/Baz1b/Suz12/Mta2/Ogt/Dot1l/Smarca4/Tgfb1/Mta1/Kmt2a/Tbl1x/Ehmt2/Msl2/Kat6a/Atxn7l3/Actl6a/Hdac3/Suv39h1/Rnf40/Kat2a/Mcrs1/Ctr9/Cdc73/Setd7/Jmjd1c/Ehmt1/Kansl1/Kansl3/Crebbp/Nfyc/Nelfa/Kat14/Setd1a/Smyd2/Leo1/Kat5/Ube2a/Kat8/Hdac6/Hdac5/Ring1/Hdac8/Smyd1/Setmar	46
BP	GO:1901987	regulation of cell cycle phase transition	84/2090	449/28891	6.67564e-16	3.24937e-13	2.39093e-13	Eif4g1/Rcc2/Phb2/Psme1/Tpr/Lmnb1/Rad21/Ccng1/Smarcc1/Dot1l/Smarca4/Ankrd17/Akt1/Dgkz/Arid1a/Trrap/Brd4/Tgfb1/Zc3h12d/Ints7/Rbm38/Cul3/Pbrm1/Ik/Zwint/Paxip1/Smarcc2/Phf10/Cdc25a/Clspn/Mapk14/Mdm2/Ecd/Rbl1/Actl6a/Dpf2/Cdkn1a/Ctc1/Ino80/Cdc73/Cdc7/Mepce/Mtbp/Arid1b/Rbbp8/Hsf1/Dlg1/Uimc1/Pten/Crebbp/Apc/Rptor/Brca2/Ambra1/Pkd1/Rb1/Smarcd1/Rad9a/Zfp655/Nek1/Hinfp/Haspin/Bcl7a/Smarca2/Rbl2/Zfyve19/Fbxo…	84
BP	GO:0000082	G1/S transition of mitotic cell cycle	56/2090	233/28891	7.78729e-16	3.49889e-13	2.57453e-13	Eif4g1/Psme1/Smarcc1/Smarca4/Ankrd17/Akt1/Dgkz/Arid1a/Pole/Nfatc1/Brd4/Zc3h12d/Rbm38/Pbrm1/Smarcc2/Phf10/Cdc25a/Mdm2/Ecd/Rbl1/Actl6a/Eif4ebp1/Dpf2/Tcf19/Cdkn1a/Ino80/Cdc73/Usp37/Mepce/Mtbp/Arid1b/Rbbp8/Dlg1/Pten/Crebbp/Apc/Rptor/Ambra1/Pkd1/Rb1/Smarcd1/Phf8/Zfp655/Hinfp/Haspin/Bcl7a/Smarca2/Rbl2/Fbxo31/Fbxo7/Lsm11/Myb/Plk2/Cdkn2c/E2f7/Bach1	56
BP	GO:0043414	macromolecule methylation	54/2090	220/28891	9.72424e-16	4.05709e-13	2.98527e-13	Dnmt1/Hcfc1/Suz12/Mta2/Parp1/Ogt/Btg1/Dot1l/Smarca4/Akt1/Kmt2a/Snrpd3/Ehmt2/Prmt7/Carm1/Rbm15/Rbm15b/Suv39h1/Prmt3/Zc3h13/Mcrs1/Setd7/Mepce/Ehmt1/Kansl1/Icmt/Tarbp1/Kansl3/Atf7ip/Pcif1/Gnas/Nelfa/Rab6a/Mtrr/Arid4a/Wdr6/Setd1a/Smyd2/Arid4b/Bend3/Dalrd3/Mettl3/Kat8/Mettl5/Mbd4/N6amt1/Cbll1/Trmt10b/Fdxacb1/Slc25a26/Smyd1/Rab3d/Setmar/Cmtr1	54
BP	GO:0006417	regulation of translation	79/2090	418/28891	2.73903e-15	1.06658e-12	7.84803e-13	Pabpc1/Eif4g1/Ptbp1/Shmt2/Eif3b/Larp1/Eif5/C1qbp/Ppp1ca/Tcof1/Tpr/Khsrp/Eif4enif1/Mapk1/Khdrbs1/Abcf1/Ogt/Eif4ebp2/Ago2/Akt1/Eif3k/Eif4a3/Eif4g3/Ifrd2/Upf1/Uhmk1/Zc3h12d/Nat10/Zfp706/Eif2a/Ptk2b/Scrib/Eif2b5/Zfp598/Dnajc3/Fmr1/Fxr1/Pum1/Pnpt1/Ireb2/Eif4ebp1/Paip2/Casc3/Polr2g/Cnot3/Ago1/Ngdn/Patl1/Dcp1a/Xrn1/Tut7/Tia1/Pcif1/Cnot11/Fto/Pym1/Mlh1/Secisbp2l/Dcps/Unk/Rc3h2/Dnajc1/Enc1/Mettl3/Lsm14b/L…	79
BP	GO:1901873	regulation of post-translational protein modification	63/2090	295/28891	5.27183e-15	1.86313e-12	1.37092e-12	Mybbp1a/Huwe1/Hcfc1/U2af2/Noc2l/Baz1b/Dnaja1/Wnk1/Ube2i/Ogt/Ndfip1/Ctnnb1/Mycbp2/Akt1/Ubqln1/Cblb/Tgfb1/Mta1/Cul3/Ehmt2/Paxip1/Traf7/Abca2/Rbx1/Ubxn1/Xiap/Hdac3/Suv39h1/Prmt3/Rnf40/Pdcd6/Axin1/Mcrs1/Abl1/Gsk3a/Herpud1/Ubxn2a/Gabarap/Ehmt1/Kansl1/Mtbp/Kansl3/Pten/Nfyc/Nelfa/Aimp2/Fanci/Rchy1/Flcn/Ndfip2/Arnt/Nxn/Cep63/Kat8/Dcun1d2/Limk1/Mastl/Btrc/Zc3h12a/Ticam1/P3h1/Hdac8/Spry2	63
BP	GO:0034248	regulation of amide metabolic process	86/2090	482/28891	5.42257e-15	1.86313e-12	1.37092e-12	Pabpc1/Eif4g1/Ptbp1/Shmt2/Eif3b/Larp1/Eif5/C1qbp/Ppp1ca/Tcof1/Tpr/Khsrp/Eif4enif1/Mapk1/Khdrbs1/Abcf1/Ogt/Eif4ebp2/Ago2/Akt1/Eif3k/Eif4a3/Eif4g3/Ifrd2/Upf1/Uhmk1/Zc3h12d/Nat10/Zfp706/Eif2a/Ptk2b/Scrib/Eif2b5/Zfp598/Dnajc3/Fmr1/Fxr1/Abca2/Pum1/Pnpt1/Ireb2/Eif4ebp1/Paip2/Casc3/Gsk3a/Polr2g/Cnot3/Ago1/Ngdn/Patl1/Dcp1a/Xrn1/Tut7/Tia1/Pcif1/Apc/Cnot11/Fto/Rptor/Pym1/Mlh1/Secisbp2l/Dcps/Unk/Rc3h2/Dnajc…	86
BP	GO:0044843	cell cycle G1/S phase transition	58/2090	260/28891	8.41438e-15	2.73047e-12	2.00912e-12	Eif4g1/Phb2/Psme1/Smarcc1/Smarca4/Ankrd17/Akt1/Dgkz/Arid1a/Pole/Nfatc1/Brd4/Zc3h12d/Rbm38/Pbrm1/Smarcc2/Phf10/Cdc25a/Mdm2/Ecd/Rbl1/Actl6a/Eif4ebp1/Dpf2/Tcf19/Cdkn1a/Ino80/Cdc73/Usp37/Mepce/Mtbp/Arid1b/Map3k11/Rbbp8/Dlg1/Pten/Crebbp/Apc/Rptor/Ambra1/Pkd1/Rb1/Smarcd1/Phf8/Zfp655/Hinfp/Haspin/Bcl7a/Smarca2/Rbl2/Fbxo31/Fbxo7/Lsm11/Myb/Plk2/Cdkn2c/E2f7/Bach1	58
BP	GO:1901990	regulation of mitotic cell cycle phase transition	68/2090	343/28891	2.141e-14	6.47063e-12	4.76119e-12	Eif4g1/Rcc2/Phb2/Psme1/Tpr/Lmnb1/Rad21/Ccng1/Smarcc1/Smarca4/Ankrd17/Akt1/Dgkz/Arid1a/Brd4/Tgfb1/Zc3h12d/Rbm38/Cul3/Pbrm1/Ik/Zwint/Smarcc2/Phf10/Cdc25a/Clspn/Mdm2/Ecd/Rbl1/Actl6a/Dpf2/Cdkn1a/Ctc1/Ino80/Cdc73/Cdc7/Mepce/Mtbp/Arid1b/Rbbp8/Dlg1/Uimc1/Pten/Crebbp/Apc/Rptor/Ambra1/Pkd1/Rb1/Smarcd1/Zfp655/Haspin/Bcl7a/Smarca2/Rbl2/Zfyve19/Fbxo31/Nsmce2/Xrcc3/Abraxas1/Fbxo7/Lsm11/Mbd4/Xpc/Cdkn2c/E2f7/Wn…	68
BP	GO:0006302	double-strand break repair	62/2090	296/28891	2.21559e-14	6.47063e-12	4.76119e-12	Chd4/Actr2/Sfpq/Mcm2/Rad21/Parp1/Smarcc1/Nsd2/Smarca4/Arid1a/Trrap/Mta1/Pbrm1/Yy1/Ubqln4/Smarcc2/Phf10/Cdc45/Actl6a/Nsmce1/Dpf2/Mms19/Ino80/Abl1/Cdc7/Was/Arid1b/Rbbp8/Hsf1/Uimc1/Brca2/Gins4/Mlh1/Slx4/Brip1/Smarcd1/Rnf168/Kat5/Epc1/Vps72/Helq/Ing3/Rad51d/Rnf169/Smarcal1/Bcl7a/Smarca2/Ercc8/Ercc4/Nsmce2/Xrcc3/Abraxas1/Spire1/Aunip/Rad52/Shld2/Zfp365/Lig4/Fan1/Rnf8/Rad51c/Setmar	62
BP	GO:0006401	RNA catabolic process	62/2090	297/28891	2.6059e-14	7.24812e-12	5.33327e-12	Pabpc1/Hnrnpab/Ptbp1/Hnrnpa0/Larp1/Hnrnpc/Pabpc4/Thrap3/Khsrp/Eif4enif1/Rnps1/Snd1/Ago2/Eif4a3/Exosc10/Upf1/Zc3h12d/Rbm38/Dis3/Zc3h18/Trnt1/Rbm8a/Sidt2/Fmr1/Fxr1/Edc4/Pum1/Pnpt1/Casc3/Grsf1/Angel2/Polr2g/Cnot3/Ago1/Tnfrsf1b/Lsm2/Patl1/Ikbke/Dcp1a/Xrn1/Pnrc2/Tut7/Fto/Pym1/Mlh1/Dcps/Zcchc7/Phax/Rc3h2/Brf1/Smg6/Mettl3/Lsm1/Dhx34/Zc3h12a/Dis3l/Pcbp4/Fen1/Nudt16/Pelo/Ctif/Nbdy	62
BP	GO:0010506	regulation of autophagy	62/2090	300/28891	4.21761e-14	1.10193e-11	8.10815e-12	Eif4g1/Larp1/Wnk1/Akt1/Ubqln1/Htt/Supt5/Trim27/Foxk2/Usp36/Ehmt2/Ubqln4/Usp10/Rab8a/Foxk1/Pip4k2b/Trim8/Gsk3a/Cisd2/Trp53inp1/Sec22b/Tsc2/Rptor/Foxo3/Ambra1/Atf6/Bcl2l11/Wdr6/Vps13d/Ubqln2/Golga2/Sptlc2/Kat5/Flcn/Mtmr9/Atg2a/Kat8/Pik3c2a/Atp13a2/Tecpr1/Rnf41/Rmc1/Hdac6/Clec16a/Ercc4/Dapl1/Tpcn1/Fbxo7/Zc3h12a/Dram2/Gpsm1/Plk2/Qsox1/Ticam1/Fyco1/Usp20/Trim65/Xpa/Gpr137/Wdr45/Cttn/Ager	62
BP	GO:0032259	methylation	59/2090	277/28891	4.33904e-14	1.10193e-11	8.10815e-12	Dnmt1/Hcfc1/Suz12/Mta2/Parp1/Ogt/Btg1/Dot1l/Nsd2/Smarca4/Akt1/Kmt2a/Snrpd3/Ehmt2/Prmt7/Carm1/Rnmt/Rbm15/Rbm15b/Suv39h1/Prmt3/Zc3h13/Mcrs1/Setd7/Mepce/Ehmt1/Kansl1/Icmt/Tarbp1/Kansl3/Atf7ip/Pcif1/Gnas/Nelfa/Rab6a/Mtrr/Mettl9/Arid4a/Wdr6/Setd1a/Smyd2/Arid4b/Bend3/Dalrd3/Mettl3/Kat8/Mettl5/Mbd4/N6amt1/Cbll1/Prdm11/Trmt10b/As3mt/Fdxacb1/Slc25a26/Smyd1/Rab3d/Setmar/Cmtr1	59
BP	GO:2000045	regulation of G1/S transition of mitotic cell cycle	43/2090	166/28891	1.0729e-13	2.61116e-11	1.92133e-11	Eif4g1/Psme1/Smarcc1/Smarca4/Ankrd17/Akt1/Dgkz/Arid1a/Zc3h12d/Rbm38/Pbrm1/Smarcc2/Phf10/Mdm2/Ecd/Rbl1/Actl6a/Dpf2/Cdkn1a/Ino80/Cdc73/Mepce/Mtbp/Arid1b/Dlg1/Pten/Crebbp/Apc/Rptor/Ambra1/Pkd1/Rb1/Smarcd1/Zfp655/Haspin/Bcl7a/Smarca2/Rbl2/Fbxo31/Fbxo7/Lsm11/Cdkn2c/E2f7	43
BP	GO:0043484	regulation of RNA splicing	46/2090	187/28891	1.17114e-13	2.73625e-11	2.01338e-11	Ptbp1/Hnrnpl/Rbm39/Thrap3/U2af2/C1qbp/Snrnp70/Polr2a/Rbm25/Srrm1/Khdrbs1/Ptbp3/Rnps1/Slc38a2/Ddx17/Celf2/Dazap1/Eif4a3/Puf60/Trrap/Rrp1b/Sf3b4/Rbm38/Rbm8a/Ccnl1/Clk1/Fmr1/Fxr1/Atxn7l3/Rbm15/Rbm15b/Kat2a/Grsf1/Rbm22/Jmjd6/Snw1/Tia1/Clk4/Srsf4/Zfp64/Mbnl3/Ptbp2/Zc3h10/Pcbp4/Tada2b/Rbm4	46
BP	GO:0006289	nucleotide-excision repair	28/2090	78/28891	3.36346e-13	7.55614e-11	5.55992e-11	Smarcc1/Smarca4/Arid1a/Pole/Pbrm1/Smarcc2/Phf10/Actl6a/Dpf2/Arid1b/Brca2/Slx4/Brip1/Smarcd1/Kat5/Polk/Bcl7a/Smarca2/Ercc8/Ercc4/Xpc/Rad52/Fancc/Cetn4/Xpa/Lig4/Fan1/Nthl1	28
BP	GO:0050684	regulation of mRNA processing	38/2090	139/28891	4.61237e-13	9.9781e-11	7.34203e-11	Ptbp1/Hnrnpl/Rbm39/Thrap3/U2af2/C1qbp/Snrnp70/Papola/Rbm25/Srrm1/Khdrbs1/Ptbp3/Rnps1/Ddx17/Celf2/Dazap1/Eif4a3/Puf60/Ahcyl1/Sf3b4/Sltm/Rbm8a/Safb2/Fmr1/Fxr1/Fip1l1/Rbm15/Rbm15b/Cdc73/Jmjd6/Snw1/Tia1/Ptcd2/Srsf4/Leo1/Zfp64/Pcbp4/Rbm4	38
BP	GO:0006402	mRNA catabolic process	53/2090	249/28891	8.64016e-13	1.8024e-10	1.32623e-10	Pabpc1/Hnrnpab/Ptbp1/Hnrnpa0/Larp1/Hnrnpc/Pabpc4/Thrap3/Khsrp/Eif4enif1/Rnps1/Snd1/Ago2/Eif4a3/Exosc10/Upf1/Zc3h12d/Rbm38/Rbm8a/Fmr1/Fxr1/Edc4/Pum1/Pnpt1/Casc3/Angel2/Polr2g/Cnot3/Ago1/Lsm2/Patl1/Ikbke/Dcp1a/Xrn1/Pnrc2/Tut7/Fto/Pym1/Mlh1/Dcps/Zcchc7/Rc3h2/Brf1/Smg6/Mettl3/Lsm1/Dhx34/Zc3h12a/Pcbp4/Nudt16/Pelo/Ctif/Nbdy	53
BP	GO:0006282	regulation of DNA repair	48/2090	212/28891	9.50243e-13	1.91392e-10	1.40829e-10	Actr2/Trim28/Parp1/Smarcc1/Nsd2/Smarca4/Arid1a/Trrap/Pbrm1/Yy1/Uchl5/Ubqln4/Smarcc2/Phf10/Atxn7l3/Actl6a/Suv39h1/Kat2a/Dpf2/Mms19/Mcrs1/Ino80/Abl1/Was/Arid1b/Hsf1/Uimc1/Taf4/Smarcd1/Rnf168/Kat5/Epc1/Vps72/Helq/Ing3/Rnf169/Bcl7a/Smarca2/Ercc8/Abraxas1/Spire1/Aunip/Rad52/Tada2b/Shld2/Zfp365/Rnf8/Setmar	48
BP	GO:0009100	glycoprotein metabolic process	66/2090	354/28891	1.0143e-12	1.97485e-10	1.45312e-10	Mlec/Mogs/Ogt/Ago2/Ctnnb1/St6galnac4/Galnt1/Abca2/Gfpt1/Dad1/Ube2j1/Galnt6/Alg10b/Extl3/Man1a2/Krtcap2/Ncstn/Man2a1/Man1b1/Dpy19l1/Cant1/Tmem258/Slc35c1/Chpf/Ext2/Slc35b2/Dhdds/Fkrp/Alg5/Galnt7/Golga2/B3galnt2/Xxylt1/Galnt10/Tet2/Pomgnt1/Pmm1/Ndst1/Entpd5/Mgat5/Hs6st1/Ids/Pofut2/Dpy19l3/Hgsnat/St8sia1/Cog7/Slc35d1/Glce/Slc39a8/Galnt11/Idua/Gpc1/Pxylp1/B4gat1/St3gal5/Atp7a/Arsb/Ctsl/Fbxo17/Phlda1/…	66
BP	GO:0034655	nucleobase-containing compound catabolic process	73/2090	414/28891	1.12962e-12	2.12843e-10	1.56613e-10	Pabpc1/Hnrnpab/Ptbp1/Hnrnpa0/Larp1/Hnrnpc/Pabpc4/Thrap3/Khsrp/Eif4enif1/Rnps1/Snd1/Ago2/Eif4a3/Exosc10/Upf1/Zc3h12d/Rbm38/Dis3/Zc3h18/Trnt1/Rbm8a/Sidt2/Fmr1/Fxr1/Edc4/Pum1/Pnpt1/Casc3/Grsf1/Angel2/Polr2g/Cnot3/Ago1/Tnfrsf1b/Lsm2/Patl1/Ikbke/Dcp1a/Xrn1/Pnrc2/Tut7/Hsf1/Nudt3/Cant1/Fto/Pym1/Mlh1/Pank4/Dcps/Zcchc7/Phax/Rc3h2/Brf1/Dnph1/Smg6/Mettl3/Lsm1/Dhx34/Entpd5/Zc3h12a/Dis3l/Pcbp4/Cdadc1/Adal/Abc…	73
BP	GO:0016236	macroautophagy	55/2090	268/28891	1.52847e-12	2.78994e-10	2.05288e-10	Larp1/Huwe1/Phb2/Atp2a2/Ogt/Rab7/Ubqln1/Htt/Supt5/Pdcd6ip/Tgfb1/Usp36/Ehmt2/Ubqln4/Aup1/Pip4k2b/Ei24/Myo5a/Wipi2/Ubxn2a/Gabarap/Trp53inp1/Mfn2/Sec22b/Tsc2/Ambra1/Ufm1/Tcirg1/Vps13d/Pacs2/Gaa/Ubqln2/Sptlc2/Chmp5/Uba5/Tbc1d5/Atg2a/Pik3c2a/Atp13a2/Tex264/Chmp6/Tecpr1/Rnf41/Hdac6/Clec16a/Gpsm1/Qsox1/Atg9b/Fyco1/Rab23/Wdr45/Trp53inp2/Rab19/Rab43/Efnb1	55
BP	GO:0006368	transcription elongation by RNA polymerase II	31/2090	100/28891	1.69764e-12	3.00482e-10	2.21099e-10	Parp1/Ctnnb1/Polr2m/Brd4/Supt5/Usp15/Pbrm1/Med1/Cdk13/Eaf1/Med24/Axin1/Ctr9/Med15/Ccnt2/Cdc73/Med25/Ccnk/Supt4a/Elof1/Nelfa/Nelfcd/Rnf168/Leo1/Med16/Eapp/Pwwp2a/Med20/Med26/Rnf8/Eaf2	31
BP	GO:0044270	cellular nitrogen compound catabolic process	76/2090	446/28891	2.28435e-12	3.92438e-10	2.88762e-10	Pabpc1/Hnrnpab/Ptbp1/Hnrnpa0/Larp1/Hnrnpc/Pabpc4/Thrap3/Khsrp/Eif4enif1/Rnps1/Snd1/Ago2/Eif4a3/Exosc10/Upf1/Zc3h12d/Rbm38/Dis3/Zc3h18/Trnt1/Rbm8a/Sidt2/Fmr1/Fxr1/Edc4/Pum1/Pnpt1/Casc3/Grsf1/Angel2/Polr2g/Cnot3/Ago1/Tnfrsf1b/Lsm2/Patl1/Ikbke/Dcp1a/Xrn1/Pnrc2/Tut7/Hsf1/Nudt3/Cant1/Fto/Pym1/Mlh1/Pank4/Dcps/Zcchc7/Phax/Rc3h2/Por/Brf1/Blvra/Tet2/Dnph1/Smg6/Mettl3/Lsm1/Dhx34/Entpd5/Zc3h12a/Dis3l/Pcbp4/…	76
BP	GO:0007059	chromosome segregation	72/2090	416/28891	4.04276e-12	6.74679e-10	4.96439e-10	Rcc2/Actr2/Flna/Baz1b/Tpr/Rad21/Ube2i/Hjurp/Nudc/Dync1h1/Smarcc1/Smarca4/Bag6/Arid1a/Numa1/Brd4/Cul3/Pbrm1/Ik/Csnk1d/Zwint/Ehmt2/Rrs1/Smarcc2/Phf10/Stag1/Pum1/Clasp1/Actl6a/Hdac3/Plscr1/Dpf2/Tlk1/Mms19/Ino80/Map1s/Arid1b/Kifc1/Tlk2/Pten/Apc/Kif2a/Brca2/Chtf18/Mlh1/Tubgcp6/Brip1/Mzt1/Rb1/Smarcd1/Golga2/Ciao1/Psrc1/Kat5/Chmp5/Naa60/Cenpn/Syce2/Cep63/Haspin/Bcl7a/Chmp6/Smarca2/Oip5/Nsmce2/Xrcc3/Abra…	72
BP	GO:0006352	DNA-templated transcription initiation	36/2090	135/28891	4.20163e-12	6.81715e-10	5.01616e-10	Sub1/Maz/Cand1/Taf1/Paxip1/Med12/Rrn3/Med1/Gtf3c1/Srf/Tfam/Med24/Med15/Polr2g/Med25/Gtf2e2/Gtf2a1/Atf7ip/Rsf1/Gtf3c4/Gtf3c5/Polr2d/Taf4/Tbpl1/Polrmt/Brf1/Med16/Taf3/Znhit1/Pwwp2a/Med20/Med26/Taf9b/Xpa/Wnt10b/Ctnnbip1	36
BP	GO:1902806	regulation of cell cycle G1/S phase transition	44/2090	192/28891	5.38347e-12	8.21221e-10	6.04266e-10	Eif4g1/Phb2/Psme1/Smarcc1/Smarca4/Ankrd17/Akt1/Dgkz/Arid1a/Zc3h12d/Rbm38/Pbrm1/Smarcc2/Phf10/Mdm2/Ecd/Rbl1/Actl6a/Dpf2/Cdkn1a/Ino80/Cdc73/Mepce/Mtbp/Arid1b/Dlg1/Pten/Crebbp/Apc/Rptor/Ambra1/Pkd1/Rb1/Smarcd1/Zfp655/Haspin/Bcl7a/Smarca2/Rbl2/Fbxo31/Fbxo7/Lsm11/Cdkn2c/E2f7	44
BP	GO:0006446	regulation of translational initiation	24/2090	64/28891	5.45325e-12	8.21221e-10	6.04266e-10	Eif4g1/Eif3b/Larp1/Eif5/Tpr/Khdrbs1/Eif4ebp2/Ago2/Eif3k/Uhmk1/Scrib/Zfp598/Dnajc3/Fmr1/Eif4ebp1/Paip2/Polr2g/Mettl3/Mknk1/Impact/Fech/Klhl25/Rbm4/Ctif	24
BP	GO:0006413	translational initiation	34/2090	123/28891	5.48324e-12	8.21221e-10	6.04266e-10	Eif4g1/Eif3b/Larp1/Eif5/Eif4h/Eif3i/Tpr/Eif3f/Khdrbs1/Abcf1/Eif4ebp2/Ago2/Eif3k/Slbp/Eif4g3/Eif3g/Uhmk1/Eif2a/Scrib/Eif2b5/Zfp598/Dnajc3/Fmr1/Eif4ebp1/Paip2/Polr2g/Dhx29/Mettl3/Mknk1/Impact/Fech/Klhl25/Rbm4/Ctif	34
BP	GO:0034243	regulation of transcription elongation by RNA polymerase II	26/2090	75/28891	5.89731e-12	8.61155e-10	6.33651e-10	Parp1/Ctnnb1/Brd4/Supt5/Med1/Cdk13/Eaf1/Med24/Axin1/Med15/Ccnt2/Cdc73/Med25/Ccnk/Supt4a/Nelfa/Nelfcd/Rnf168/Leo1/Med16/Eapp/Pwwp2a/Med20/Med26/Rnf8/Eaf2	26
BP	GO:0046700	heterocycle catabolic process	75/2090	446/28891	6.19509e-12	8.82574e-10	6.49411e-10	Pabpc1/Hnrnpab/Ptbp1/Hnrnpa0/Larp1/Hnrnpc/Pabpc4/Thrap3/Khsrp/Eif4enif1/Rnps1/Snd1/Ago2/Eif4a3/Exosc10/Upf1/Zc3h12d/Rbm38/Dis3/Zc3h18/Trnt1/Rbm8a/Sidt2/Fmr1/Fxr1/Edc4/Pum1/Pnpt1/Casc3/Grsf1/Angel2/Polr2g/Cnot3/Ago1/Tnfrsf1b/Lsm2/Patl1/Ikbke/Dcp1a/Xrn1/Pnrc2/Tut7/Hsf1/Nudt3/Cant1/Fto/Pym1/Mlh1/Pank4/Dcps/Zcchc7/Phax/Rc3h2/Brf1/Blvra/Tet2/Dnph1/Smg6/Mettl3/Lsm1/Dhx34/Entpd5/Zc3h12a/Dis3l/Pcbp4/Cdad…	75
BP	GO:0045739	positive regulation of DNA repair	35/2090	132/28891	9.91773e-12	1.37927e-09	1.01489e-09	Actr2/Trim28/Parp1/Smarcc1/Smarca4/Arid1a/Trrap/Pbrm1/Yy1/Uchl5/Smarcc2/Phf10/Actl6a/Dpf2/Mms19/Mcrs1/Ino80/Was/Arid1b/Uimc1/Smarcd1/Rnf168/Kat5/Epc1/Vps72/Helq/Ing3/Bcl7a/Smarca2/Ercc8/Abraxas1/Spire1/Shld2/Rnf8/Setmar	35
BP	GO:0009101	glycoprotein biosynthetic process	56/2090	289/28891	1.08038e-11	1.46756e-09	1.07985e-09	Mlec/Mogs/Ogt/Ago2/Ctnnb1/St6galnac4/Galnt1/Abca2/Gfpt1/Dad1/Ube2j1/Galnt6/Alg10b/Extl3/Krtcap2/Ncstn/Dpy19l1/Cant1/Tmem258/Slc35c1/Chpf/Ext2/Slc35b2/Dhdds/Fkrp/Alg5/Galnt7/Golga2/B3galnt2/Xxylt1/Galnt10/Tet2/Pomgnt1/Pmm1/Ndst1/Entpd5/Mgat5/Hs6st1/Pofut2/Dpy19l3/St8sia1/Cog7/Slc35d1/Glce/Slc39a8/Galnt11/Pxylp1/B4gat1/St3gal5/Atp7a/Phlda1/Chst14/Fut7/Vangl2/Gata1/Pomgnt2	56
BP	GO:1903706	regulation of hemopoiesis	75/2090	452/28891	1.20332e-11	1.5974e-09	1.17539e-09	Ndfip1/Smarcc1/Smarca4/Ctnnb1/Cbfb/Cd44/Arid1a/Tgfb1/Pbrm1/Ptk2b/Smarcc2/Med1/Clptm1/Phf10/Hax1/Kat6a/Ptpn2/Mapk14/Zfpm1/Notch2/Actl6a/Rbm15/Ctla4/Ap3b1/Kat2a/Drosha/Ctr9/Abl1/Cdc73/Arid1b/Hsf1/Rcor1/Apc/Rptor/Foxo3/Pithd1/Gnas/Ambra1/Sh2b3/Rhoh/Rb1/Smarcd1/Setd1a/Rc3h2/Leo1/Kat5/Tmem64/Card11/Mettl3/Tfe3/Il15ra/Brpf3/Smarca2/Rnf41/Fbxo7/Zc3h12a/Sox12/Myb/Smap1/Fadd/Klhl25/Csf1/Wnt10b/Tsc22d1/Gpr…	75
BP	GO:0018205	peptidyl-lysine modification	48/2090	227/28891	1.30152e-11	1.68937e-09	1.24307e-09	Mybbp1a/Trim28/Hcfc1/Noc2l/Baz1b/Suz12/Rangap1/Ube2i/Ogt/Dot1l/Smarca4/Bag6/Ctnnb1/Tgfb1/Kmt2a/Ehmt2/Traf7/Msl2/Kat6a/Actl6a/Suv39h1/Kat2a/Mcrs1/Jmjd6/Uspl1/Setd7/Ehmt1/Kansl1/Desi1/Kansl3/Crebbp/Dip2b/Nfyc/Nelfa/Kat14/Setd1a/Smyd2/Por/Kat5/Arnt/Kat8/Hdac6/Nsmce2/Hdac8/Atp7a/Smyd1/Hint2/Setmar	48
BP	GO:0033044	regulation of chromosome organization	50/2090	244/28891	1.6531e-11	2.0674e-09	1.52122e-09	Sfpq/Hnrnpc/Trim28/Mcm2/Baz1b/Sub1/Tpr/Rad21/Mapk1/Parp1/Smarcc1/Smarca4/Ctnnb1/Arid1a/Numa1/Exosc10/Upf1/Nat10/Cul3/Pbrm1/Yy1/Ik/Zwint/Uchl5/Smarcc2/Phf10/Actl6a/Dpf2/Ylpm1/Ctc1/Mcrs1/Ino80/Arid1b/Atf7ip/Apc/Slx4/Rb1/Smarcd1/Kat5/Smg6/Haspin/Bcl7a/Smarca2/Ercc4/Nsmce2/Xrcc3/Fen1/Lig4/Hdac8/Setmar	50
BP	GO:0006913	nucleocytoplasmic transport	64/2090	359/28891	1.69894e-11	2.0674e-09	1.52122e-09	Ywhae/Trim28/Nup210/Flna/Phb2/Tpr/Anp32a/Rangap1/Wnk1/Eif4enif1/Ube2i/Mapk1/Khdrbs1/Xpo6/Akt1/Eif4a3/Kpna4/Nup188/Notch1/Ahcyl1/Uhmk1/Tgfb1/Ipo9/Nup93/Pom121/Xpo7/Nol6/Rbm8a/Sec13/Nup214/Med1/Fmr1/Ppp1r12a/Nup133/Mapk14/Mdm2/Hdac3/Rbm15b/Casc3/Emd/Cdkn1a/Axin1/Rbm22/Ei24/Mlxip/Ipo8/Zfp384/Desi1/Agap3/Fam53b/Tsc2/Prkaca/Ufm1/Ipo13/Akap1/Pkd1/Phax/Hikeshi/Zc3h12a/Prkag1/Zc3h11a/Cry2/Rab23/Rbm4	64
BP	GO:0051169	nuclear transport	64/2090	359/28891	1.69894e-11	2.0674e-09	1.52122e-09	Ywhae/Trim28/Nup210/Flna/Phb2/Tpr/Anp32a/Rangap1/Wnk1/Eif4enif1/Ube2i/Mapk1/Khdrbs1/Xpo6/Akt1/Eif4a3/Kpna4/Nup188/Notch1/Ahcyl1/Uhmk1/Tgfb1/Ipo9/Nup93/Pom121/Xpo7/Nol6/Rbm8a/Sec13/Nup214/Med1/Fmr1/Ppp1r12a/Nup133/Mapk14/Mdm2/Hdac3/Rbm15b/Casc3/Emd/Cdkn1a/Axin1/Rbm22/Ei24/Mlxip/Ipo8/Zfp384/Desi1/Agap3/Fam53b/Tsc2/Prkaca/Ufm1/Ipo13/Akap1/Pkd1/Phax/Hikeshi/Zc3h12a/Prkag1/Zc3h11a/Cry2/Rab23/Rbm4	64
BP	GO:0034504	protein localization to nucleus	61/2090	335/28891	2.03448e-11	2.42518e-09	1.78448e-09	Ywhae/Hnrnpm/Trim28/Flna/Phb2/Tpr/Rangap1/Lmnb1/Eif4enif1/Mapk1/Parp1/Ogt/Akt1/Kpna4/Nup188/Notch1/Htt/Tgfb1/Ipo9/Nup93/Pom121/Sec13/Nup214/Rrs1/Dnajb6/Med1/Nup133/Mapk14/Mdm2/Hdac3/Cd2ap/Cdkn1a/Rbm22/Mcrs1/Trim8/Ei24/Mepce/Ipo8/Mark3/Agap3/Fam53b/Tsc2/Lmnb2/Crebbp/Tyk2/Arl2bp/Tmem201/Ufm1/Ipo13/Akap1/Hikeshi/Flcn/Cnep1r1/Taf3/Atp13a2/Zc3h12a/Cry2/Tesk1/Xpa/Rab23/Dclk1	61
BP	GO:0048193	Golgi vesicle transport	54/2090	281/28891	3.49282e-11	4.08031e-09	3.00235e-09	Rab8b/Csk/Rab10/Htt/Sar1a/Tmed5/Cul3/Sec13/Sec31a/Copz1/Rab8a/Ap1g1/Snx1/Bcap31/Sec16a/Trappc10/Pdcd6/Erp29/Golga7/Pitpnb/Myo5a/Ergic1/Gbf1/Nsf/Exoc6/Kif1c/Sec22b/Mia3/Arfgap2/Llgl1/Rab6a/Gga1/Scyl1/Golga2/Cnih4/Cog8/Trappc6b/Prkci/Myo18a/Cog1/Vamp4/Golph3l/Trappc9/Exoc8/Cog7/Slc30a6/Spire1/Bet1/Cyth3/Ccdc91/Ehd3/Bet1l/Lman2l/Bbs2	54
BP	GO:0007264	small GTPase mediated signal transduction	71/2090	428/28891	4.28465e-11	4.90719e-09	3.61078e-09	Arhgdia/Rap1b/Lat/Ogt/Rapgef1/Dgkz/Dbnl/Notch1/Myo9b/Wasf2/Dock8/Cul3/Cdc42se1/Sipa1/Dhcr24/Heg1/Rhog/Nucb1/Notch2/Git1/Gdi1/Cd2ap/Ralgapb/P2ry10/Git2/Madd/Rheb/Abl1/Was/Gabarap/Icmt/Mfn2/Crk/Tsc2/Spry1/Rhoh/Brap/Celsr1/Flcn/Rasa3/Kctd10/Tiam1/Cdon/Arhgap35/Stk19/Fbxo8/Vav3/Bcr/Sipa1l3/Scai/Dennd1a/Nfix/Lipa/Rab9/Plk2/Cyth3/Rufy1/Csf1/Rhebl1/Bcl6/Gpr55/Rapgef5/Itga3/Cdc42ep3/Sipa1l2/Arfgef3/Vangl…	71
BP	GO:0016050	vesicle organization	63/2090	359/28891	4.85227e-11	5.4504e-09	4.01049e-09	Ptbp1/Srgn/Rab8b/Rab7/Coro1c/Pdcd6ip/Sar1a/Mta1/Cul3/Sec13/Sec31a/Dnajc13/Rab8a/Ap1g1/Ap1m1/Sec16a/Ap1b1/Ap3b1/Cd2ap/Trappc10/Pip4k2b/Pdcd6/Atp6v1b2/Nbeal2/Slamf1/Atp6v1f/Atp6v1h/Gbf1/Sec22b/Mia3/Arfgap2/Lyst/Stx16/Atp6v1e1/Atp6v1d/Tbpl1/Chmp5/Synj1/Trappc6b/Rab5b/Prkci/Tgfbrap1/Myo18a/Hps3/Vps8/Vamp4/Atp13a2/Golph3l/Trappc9/Chmp6/Snap47/Bloc1s4/Vav3/Exoc8/Wasl/Stx8/Bet1/Vps18/Tmcc1/Hps6/Grik5/Sd…	63
BP	GO:1902275	regulation of chromatin organization	21/2090	54/28891	5.12079e-11	5.6435e-09	4.15257e-09	Trim28/Hcfc1/Tpr/Ogt/Rlim/Msl2/Tlk1/Phf2/Mcrs1/Kansl1/Tlk2/Kansl3/Atf7ip/Setd1a/Phf8/Kat5/Epc1/Ing3/Kat8/Lsm11/Jpx	21
BP	GO:0019439	aromatic compound catabolic process	75/2090	467/28891	5.91004e-11	6.39269e-09	4.70384e-09	Pabpc1/Hnrnpab/Ptbp1/Hnrnpa0/Larp1/Hnrnpc/Pabpc4/Thrap3/Khsrp/Eif4enif1/Rnps1/Snd1/Ago2/Eif4a3/Exosc10/Upf1/Zc3h12d/Rbm38/Dis3/Zc3h18/Trnt1/Rbm8a/Sidt2/Fmr1/Fxr1/Edc4/Pum1/Pnpt1/Casc3/Grsf1/Angel2/Polr2g/Cnot3/Ago1/Tnfrsf1b/Lsm2/Patl1/Ikbke/Dcp1a/Xrn1/Pnrc2/Tut7/Hsf1/Nudt3/Cant1/Fto/Pym1/Mlh1/Pank4/Dcps/Zcchc7/Phax/Rc3h2/Brf1/Blvra/Tet2/Dnph1/Smg6/Mettl3/Lsm1/Dhx34/Entpd5/Zc3h12a/Dis3l/Pcbp4/Cdad…	75
BP	GO:0051054	positive regulation of DNA metabolic process	58/2090	321/28891	8.65516e-11	9.19178e-09	6.76345e-09	Hnrnpab/Actr2/Trim28/Mapk1/Parp1/Smarcc1/Nsd2/Smarca4/Ctnnb1/Akt1/Arid1a/Stat6/Trrap/Nfatc1/Tgfb1/Pbrm1/Yy1/Rfc5/Ptk2b/Uchl5/Paxip1/Smarcc2/Phf10/Atf1/Actl6a/Wiz/Dpf2/Ctc1/Mms19/Mcrs1/Ino80/Cdc7/Was/Prkd2/Arid1b/Hsf1/Uimc1/Chtf18/Mlh1/Slx4/E2f8/Smarcd1/Rnf168/Kat5/Epc1/Vps72/Helq/Ing3/Brpf3/Bcl7a/Smarca2/Ercc8/Abraxas1/Spire1/E2f7/Shld2/Rnf8/Setmar	58
BP	GO:1903050	regulation of proteolysis involved in protein catabolic process	47/2090	232/28891	1.00112e-10	1.0442e-08	7.6834e-09	Psme1/Ogt/Smarcc1/Bag6/Akt1/Ubqln1/Eif2a/Csnk1d/Ptk2b/Usp19/Uchl5/Usp5/Ubqln4/Traf7/Fmr1/Rbx1/Ubxn1/Bcap31/Mdm2/Ctsc/Rnf40/Ube2k/Axin1/Gsk3a/Herpud1/Gabarap/Desi1/Tlk2/Tmem168/Pten/Pithd1/Prkaca/Psmf1/Rnf14/Pkd1/Ubqln2/Alad/Rchy1/Sufu/Agtpbp1/Gipc1/Csnk1e/Clec16a/Btrc/Plk2/Rnf144a/Wnt10b	47
BP	GO:0051656	establishment of organelle localization	77/2090	491/28891	1.05107e-10	1.07707e-08	7.92526e-09	Myh9/Rcc2/Actn4/Lmnb1/Lat/Nudc/Ezr/Nr4a3/Dync1h1/Ctnnb1/Numa1/Rab7/Nefh/Htt/Pdcd6ip/Sar1a/Cul3/Scrib/Rrs1/Sec16a/Clasp1/Hdac3/Rab11b/Ap3b1/Dctn1/Trappc10/Pdcd6/Madd/Unc13d/Bicdl1/Map1s/Myo5a/Gbf1/Kifc1/Exoc6/Kif1c/Lmnb2/Dlg1/Arfgap2/Apc/Llgl1/Brca2/Tmem201/Mlh1/Spry1/Tcirg1/Rb1/Kif1b/Psrc1/Kat5/Chmp5/Synj1/Trappc6b/Agtpbp1/Cep63/Atp13a2/Trappc9/Chmp6/Hdac6/Eipr1/Bloc1s4/Tmem230/Exoc8/Abraxas1/Spi…	77
BP	GO:0140694	non-membrane-bounded organelle assembly	67/2090	402/28891	1.2235e-10	1.23215e-08	9.06636e-09	Lcp1/G3bp1/Fau/Msn/Eif5/Flna/C1qbp/Prkar1a/Tpr/Wnk1/Eif4enif1/Ubap2l/Ezr/Dync1h1/Bop1/Numa1/Dbnl/Eif2a/Csnk1d/Dhx30/Rrs1/Traf7/Usp10/Fmr1/Fxr1/Stag1/Rrp7a/Srf/Csrp1/Clasp1/Hdac3/Rbm14/Aup1/Kat2a/Bin2/Dhx37/Ino80/Jmjd6/Patl1/Dhx29/Mfn2/Tia1/Kifc1/Pten/Kif2a/Noa1/Mlh1/Tubgcp6/Mzt1/Golga2/Atxn2/Chmp5/Cep76/Cep63/Chmp6/Poc1b/Abraxas1/Cep44/Alms1/Plk2/Cetn4/Ccdc69/Rpl24/Farp2/Map10/Nbdy/Grb7	67
BP	GO:0098727	maintenance of cell number	45/2090	218/28891	1.30286e-10	1.28983e-08	9.49075e-09	Eif4enif1/Ogt/Smarcc1/Smarca4/Arid1a/Zfp706/Med12/Phf10/Kat6a/Kdm2b/Actl6a/Ski/Kat2a/Med24/Dpf2/Zc3h13/Trim8/Ctr9/Med15/Cdc73/Cnot3/Jmjd1c/Sinhcaf/Crebbp/Apc/Foxo3/Arid4a/Smarcd1/Setd1a/Arid4b/Leo1/Mettl3/Lsm1/Phf19/Vps72/Bcl7a/Smarca2/Lrp5/Nfix/Fancc/Wdr47/Lig4/Pelo/Selenon/Vangl2	45
BP	GO:0042176	regulation of protein catabolic process	63/2090	369/28891	1.5775e-10	1.5357e-08	1.12999e-08	Msn/Flna/Psme1/Ogt/Ndfip1/Ezr/Psmd3/Smarcc1/Bag6/Psmd1/Mycbp2/Akt1/Rab7/Ubqln1/Cblb/Eif2a/Csnk1d/Usp19/Uchl5/Usp5/Ubqln4/Fmr1/Abca2/Rbx1/Ubxn1/Snx1/Bcap31/Mdm2/Rnf40/Ube2k/Axin1/Gsk3a/Herpud1/Tnfrsf1b/Ubxn2a/Gabarap/Desi1/Nsf/Sec22b/Tlk2/Apc/Ubr3/Pithd1/Prkaca/Gga1/Psmf1/Rnf14/Pkd1/Ubqln2/Alad/Rchy1/Gipc1/Csnk1e/Atp13a2/Chmp6/Rnf41/Clec16a/Btrc/Sgsm3/Plk2/Atraid/Rnf144a/Wnt10b	63
BP	GO:0000956	nuclear-transcribed mRNA catabolic process	32/2090	125/28891	2.02985e-10	1.91403e-08	1.40837e-08	Pabpc1/Hnrnpab/Ptbp1/Thrap3/Eif4enif1/Rnps1/Ago2/Eif4a3/Exosc10/Upf1/Rbm8a/Edc4/Casc3/Polr2g/Cnot3/Ago1/Patl1/Dcp1a/Xrn1/Pnrc2/Pym1/Mlh1/Dcps/Zcchc7/Rc3h2/Smg6/Lsm1/Dhx34/Zc3h12a/Pelo/Ctif/Nbdy	32
BP	GO:0019827	stem cell population maintenance	44/2090	213/28891	2.03167e-10	1.91403e-08	1.40837e-08	Eif4enif1/Ogt/Smarcc1/Smarca4/Arid1a/Zfp706/Med12/Phf10/Kat6a/Kdm2b/Actl6a/Ski/Kat2a/Med24/Dpf2/Zc3h13/Trim8/Ctr9/Med15/Cdc73/Cnot3/Jmjd1c/Sinhcaf/Crebbp/Apc/Foxo3/Arid4a/Smarcd1/Setd1a/Arid4b/Leo1/Mettl3/Lsm1/Phf19/Vps72/Bcl7a/Smarca2/Lrp5/Nfix/Fancc/Wdr47/Lig4/Pelo/Vangl2	44
BP	GO:0006354	DNA-templated transcription elongation	31/2090	119/28891	2.41348e-10	2.23764e-08	1.64649e-08	Parp1/Ctnnb1/Polr2m/Brd4/Supt5/Usp15/Pbrm1/Med1/Cdk13/Eaf1/Med24/Axin1/Ctr9/Med15/Ccnt2/Cdc73/Med25/Ccnk/Supt4a/Elof1/Nelfa/Nelfcd/Rnf168/Leo1/Med16/Eapp/Pwwp2a/Med20/Med26/Rnf8/Eaf2	31
BP	GO:0016197	endosomal transport	47/2090	238/28891	2.47577e-10	2.25952e-08	1.66259e-08	Rab8b/Bcl2l1/Rab10/Rab7/Htt/Coro1c/Trim27/Scrib/Rab8a/Snx1/Rab11b/Dctn1/Snx27/Trappc10/Leprotl1/Was/Gbf1/Acap2/Vps26b/Spag9/Ube2o/Lmtk2/Lyst/Rab6a/Gga1/Stx16/Ankrd50/Mvb12a/Chmp5/Tbc1d5/Vta1/Vamp4/Heatr5a/Chmp6/Clec16a/Eipr1/Leprot/Rab11fip3/Dennd1a/Micall1/Rab9/Alms1/Tmcc1/Ehd3/Bet1l/Nsg2/Cracr2a	47
BP	GO:0090630	activation of GTPase activity	28/2090	100/28891	2.87707e-10	2.58538e-08	1.90236e-08	Rcc2/Eif5/Rangap1/Rapgef1/Coro1c/Ptk2b/Scrib/Sipa1/Rhog/Crkl/Ralgapb/Rasa1/Crk/Agap3/Tbc1d13/Tbc1d9b/Tbc1d5/Tiam1/Tbc1d2b/Bcr/Sipa1l3/Sgsm3/Tbc1d30/Tbc1d8b/Plekhg4/Sipa1l2/Tbc1d16/Arhgap29	28
BP	GO:0032784	regulation of DNA-templated transcription elongation	26/2090	88/28891	3.3861e-10	2.9967e-08	2.20502e-08	Parp1/Ctnnb1/Brd4/Supt5/Med1/Cdk13/Eaf1/Med24/Axin1/Med15/Ccnt2/Cdc73/Med25/Ccnk/Supt4a/Nelfa/Nelfcd/Rnf168/Leo1/Med16/Eapp/Pwwp2a/Med20/Med26/Rnf8/Eaf2	26
BP	GO:1901875	positive regulation of post-translational protein modification	39/2090	178/28891	3.50934e-10	3.05941e-08	2.25116e-08	Mybbp1a/Huwe1/Hcfc1/Baz1b/Ogt/Ndfip1/Mycbp2/Ubqln1/Cblb/Tgfb1/Mta1/Cul3/Paxip1/Traf7/Rbx1/Xiap/Hdac3/Suv39h1/Rnf40/Pdcd6/Axin1/Mcrs1/Gsk3a/Gabarap/Kansl1/Kansl3/Pten/Nelfa/Aimp2/Fanci/Rchy1/Ndfip2/Arnt/Kat8/Dcun1d2/Mastl/Btrc/Zc3h12a/Ticam1	39
BP	GO:0048024	regulation of mRNA splicing, via spliceosome	30/2090	114/28891	3.57803e-10	3.07342e-08	2.26147e-08	Ptbp1/Hnrnpl/Rbm39/Thrap3/U2af2/C1qbp/Snrnp70/Rbm25/Srrm1/Khdrbs1/Ptbp3/Rnps1/Ddx17/Celf2/Dazap1/Eif4a3/Puf60/Sf3b4/Rbm8a/Fmr1/Fxr1/Rbm15/Rbm15b/Jmjd6/Snw1/Tia1/Srsf4/Zfp64/Pcbp4/Rbm4	30
BP	GO:0070085	glycosylation	45/2090	225/28891	3.85214e-10	3.26092e-08	2.39943e-08	Mlec/Mogs/Ogt/B4galnt1/St6galnac4/Galnt1/Abca2/Gfpt1/Dad1/Ube2j1/Galnt6/Alg10b/Extl3/Krtcap2/Dpy19l1/Tmem258/Slc35c1/Ext2/Dhdds/Fkrp/Alg5/Galnt7/Golga2/B3galnt2/Xxylt1/Galnt10/Cog8/Tet2/Pomgnt1/Pmm1/Cog1/Gba2/Entpd5/Mgat5/Pofut2/Dpy19l3/St8sia1/Cog7/Slc39a8/Galnt11/B4gat1/St3gal5/Fut7/B4galt4/Pomgnt2	45
BP	GO:0000724	double-strand break repair via homologous recombination	37/2090	166/28891	5.91666e-10	4.93703e-08	3.63274e-08	Chd4/Actr2/Sfpq/Mcm2/Rad21/Parp1/Trrap/Yy1/Ubqln4/Cdc45/Actl6a/Nsmce1/Mms19/Ino80/Abl1/Cdc7/Was/Rbbp8/Brca2/Gins4/Slx4/Kat5/Epc1/Vps72/Helq/Ing3/Rad51d/Rnf169/Ercc4/Nsmce2/Xrcc3/Aunip/Rad52/Shld2/Zfp365/Fan1/Rad51c	37
BP	GO:1901361	organic cyclic compound catabolic process	75/2090	491/28891	6.24464e-10	5.13732e-08	3.78011e-08	Pabpc1/Hnrnpab/Ptbp1/Hnrnpa0/Larp1/Hnrnpc/Pabpc4/Thrap3/Khsrp/Eif4enif1/Rnps1/Snd1/Ago2/Eif4a3/Exosc10/Upf1/Zc3h12d/Rbm38/Dis3/Zc3h18/Trnt1/Rbm8a/Sidt2/Fmr1/Fxr1/Edc4/Pum1/Pnpt1/Casc3/Grsf1/Angel2/Polr2g/Cnot3/Ago1/Tnfrsf1b/Lsm2/Patl1/Ikbke/Dcp1a/Xrn1/Pnrc2/Tut7/Hsf1/Nudt3/Cant1/Fto/Pym1/Mlh1/Pank4/Dcps/Zcchc7/Phax/Rc3h2/Brf1/Blvra/Tet2/Dnph1/Smg6/Mettl3/Lsm1/Dhx34/Entpd5/Zc3h12a/Dis3l/Pcbp4/Cdad…	75
BP	GO:0045786	negative regulation of cell cycle	65/2090	400/28891	6.76973e-10	5.43563e-08	3.99962e-08	Baz1b/Tpr/Rad21/Ccng1/Btg1/Dot1l/Ctnnb1/Dgkz/Trrap/Brd4/Tgfb1/Zc3h12d/Ints7/Rbm38/Ik/Zwint/Scrib/Clspn/Mapk14/Mdm2/Rbl1/Gmnn/Suv39h1/Kat2a/Foxk1/Cdkn1a/Angel2/Hexim1/Abl1/Cdc73/Mtbp/Mfn2/Rbbp8/Hsf1/Kifc1/Dlg1/Uimc1/Pten/Apc/Brca2/Prkaca/Nubp1/Chtf18/E2f8/Rb1/Rad9a/Zfp655/Nek1/Znhit1/Hinfp/Haspin/Rbl2/Zfyve19/Fbxo31/Usp28/Xrcc3/Abraxas1/Fbxo7/Mbd4/Xpc/Cdkn2c/E2f7/Rpl24/Setmar/Apbb2	65
BP	GO:0098813	nuclear chromosome segregation	55/2090	312/28891	6.79338e-10	5.43563e-08	3.99962e-08	Rcc2/Actr2/Flna/Baz1b/Tpr/Rad21/Nudc/Dync1h1/Smarcc1/Smarca4/Bag6/Arid1a/Numa1/Cul3/Pbrm1/Ik/Zwint/Ehmt2/Rrs1/Smarcc2/Phf10/Stag1/Clasp1/Actl6a/Dpf2/Ino80/Map1s/Arid1b/Kifc1/Pten/Apc/Kif2a/Brca2/Mlh1/Brip1/Mzt1/Rb1/Smarcd1/Golga2/Psrc1/Kat5/Chmp5/Syce2/Cep63/Haspin/Bcl7a/Chmp6/Smarca2/Nsmce2/Xrcc3/Abraxas1/Ttl/Msh5/Mei4/Map10	55
BP	GO:2000779	regulation of double-strand break repair	32/2090	131/28891	7.38115e-10	5.82612e-08	4.28695e-08	Actr2/Parp1/Smarcc1/Nsd2/Smarca4/Arid1a/Trrap/Pbrm1/Ubqln4/Smarcc2/Phf10/Actl6a/Dpf2/Mms19/Abl1/Was/Arid1b/Hsf1/Smarcd1/Kat5/Epc1/Vps72/Helq/Ing3/Rnf169/Bcl7a/Smarca2/Spire1/Aunip/Shld2/Zfp365/Setmar	32
BP	GO:0030217	T cell differentiation	58/2090	339/28891	7.66743e-10	5.97139e-08	4.39384e-08	Smarcc1/Smarca4/Ctnnb1/Cbfb/Cd44/Arid1a/Stat6/Tgfb1/Pbrm1/Kmt2a/Vav1/Ly9/Bcl11b/Smarcc2/Clptm1/Phf10/Ptpn2/Srf/Actl6a/Ctla4/Ap3b1/Kat2a/Drosha/Abl1/Jmjd6/Lfng/Arid1b/Apc/Patz1/Ambra1/Sh2b3/Rhoh/Tcirg1/Smarcd1/Ptger4/Rc3h2/Kat5/Card11/Mettl3/Armc5/Smarca2/Lmbr1l/Zc3h12a/Sox12/Lipa/Myb/Fadd/Klhl25/Cracr2a/Txk/Lig4/Wnt10b/Bcl6/Atp7a/Ctsl/Il18r1/Fut7/Cd1d1	58
BP	GO:0031331	positive regulation of cellular catabolic process	59/2090	349/28891	8.82713e-10	6.78411e-08	4.99185e-08	Pabpc1/Larp1/Khsrp/Eif4enif1/Ago2/Htt/Upf1/Supt5/Zc3h12d/Zc3h18/Fxr1/Abca2/Pum1/Pnpt1/Git1/Grsf1/Pip4k2b/Trim8/Gsk3a/Polr2g/Cnot3/Tnfrsf1b/Patl1/Dcp1a/Trp53inp1/Tut7/Hsf1/Tsc2/Fto/Rptor/Foxo3/Ambra1/Atf6/Bcl2l11/Mlh1/Dcps/Vps13d/Rc3h2/Sptlc2/Kat5/Flcn/Mettl3/Lsm1/Atg2a/Pik3c2a/Clec16a/Tpcn1/Fbxo7/Zc3h12a/Gpsm1/Plk2/Abcd1/Ticam1/Fyco1/Usp20/Trim65/Daglb/Wdr45/Ager	59
BP	GO:0022613	ribonucleoprotein complex biogenesis	69/2090	440/28891	9.74517e-10	7.39241e-08	5.43944e-08	Rps3a1/Rpl10a/Rps16/Mybbp1a/Rpl27/Fau/Eif5/C1qbp/Noc2l/Ddx17/Ago2/Celf2/Bop1/Puf60/Exosc10/Sf3a1/Rrp1b/Wbp11/Nol9/Nat10/Ipo9/Nudt21/Dis3/Eif2a/Usp36/Nol6/Snrpd3/Dhx30/Ddx54/Rrs1/Traf7/Rrn3/Sf3a2/Prmt7/Pelp1/Rrp7a/Wdr46/Bysl/Suv39h1/Pak1ip1/Dhx37/Drosha/Wdr55/Cdc73/Riok1/Ago1/Ngdn/Lsm2/Prpf39/Dhx29/Isy1/Crnkl1/Pten/Noa1/Pop4/Slu7/Polr2d/Frg1/Eri3/Coil/Gemin2/Tsr3/Ptbp2/Mettl5/Gtf3a/Rpusd1/Gcfc2/Fd…	69
BP	GO:0006310	DNA recombination	57/2090	333/28891	1.05173e-09	7.87583e-08	5.79516e-08	Chd4/Actr2/Sfpq/Mcm2/Rad21/Parp1/Ndfip1/Nsd2/Stat6/Trrap/Msh6/Tgfb1/Yy1/Uchl5/Ubqln4/Paxip1/Bcl11b/Cdc45/Actl6a/Nsmce1/Mms19/Mcrs1/Ino80/Abl1/Cdc7/Was/Rbbp8/Brca2/Gins4/Chtf18/Mlh1/Slx4/Brip1/Rnf168/Kat5/Epc1/Vps72/Helq/Ing3/Cep63/Rad51d/Rnf169/Ercc4/Nsmce2/Xrcc3/H1f0/Aunip/Rad52/Shld2/Zfp365/Lig4/Fan1/Rnf8/Bcl6/Rad51c/Msh5/Mei4	57
BP	GO:2000781	positive regulation of double-strand break repair	25/2090	86/28891	1.07621e-09	7.95714e-08	5.85498e-08	Actr2/Parp1/Smarcc1/Smarca4/Arid1a/Trrap/Pbrm1/Smarcc2/Phf10/Actl6a/Dpf2/Mms19/Was/Arid1b/Smarcd1/Kat5/Epc1/Vps72/Helq/Ing3/Bcl7a/Smarca2/Spire1/Shld2/Setmar	25
BP	GO:0010639	negative regulation of organelle organization	63/2090	387/28891	1.14739e-09	8.3774e-08	6.16422e-08	Hnrnpc/Huwe1/Fkbp4/Mcm2/Baz1b/Ghitm/Sub1/Tpr/Capzb/Rad21/Parp1/Sptan1/Pak2/Akt1/Bcl2l1/Mtpn/Exosc10/Wasf2/Nat10/Ik/Zwint/Ehmt2/Usp10/Evl/Ppif/Coro1b/Clasp1/Ssh2/Kat2a/Ctc1/Mcrs1/Tbcd/Was/Capn1/Mtbp/Mfn2/Kifc1/Sec22b/Apc/Nubp1/Specc1l/Slx4/Hdgfl3/Camsap1/Flcn/Smg6/Haspin/Eml2/Rnf41/Hdac6/Clec16a/Ercc4/Xrcc3/Gmfg/Oma1/Cdk10/Wdr47/Tesk1/Tbc1d30/Kank3/Setmar/Nbdy/Pfn2	63
BP	GO:0000725	recombinational repair	37/2090	170/28891	1.19854e-09	8.64277e-08	6.35948e-08	Chd4/Actr2/Sfpq/Mcm2/Rad21/Parp1/Trrap/Yy1/Ubqln4/Cdc45/Actl6a/Nsmce1/Mms19/Ino80/Abl1/Cdc7/Was/Rbbp8/Brca2/Gins4/Slx4/Kat5/Epc1/Vps72/Helq/Ing3/Rad51d/Rnf169/Ercc4/Nsmce2/Xrcc3/Aunip/Rad52/Shld2/Zfp365/Fan1/Rad51c	37
BP	GO:0030099	myeloid cell differentiation	73/2090	480/28891	1.28182e-09	9.13059e-08	6.71843e-08	Myh9/Fasn/Pabpc4/Flna/Ptbp3/Ndfip1/Smarca4/Ctnnb1/Cbfb/Nfatc1/Tgfb1/Wasf2/Ptk2b/Med1/Hax1/Actn1/Kat6a/Ptpn2/Mapk14/Zfpm1/Srf/Notch2/Ireb2/Rbm15/Ap3b1/Plscr1/Nbeal2/Ctr9/Cdc73/Jmjd6/Hsf1/Rcor1/Clpb/Exoc6/Apc/Rptor/Foxo3/Pithd1/Gnas/Sh2b3/Nr3c1/Arid4a/Tcirg1/Rb1/Setd1a/Leo1/Uba5/Tet2/Tmem64/Tfe3/Kat8/Dhrs7b/Rnf41/Fech/Tgfbr3/Nfix/Lipa/Myb/Smap1/Fadd/Csf1/Dyrk3/Srp54a/Gpr137/Bcl6/Rarg/Gpr55/Acvr2a/P…	73
BP	GO:0034968	histone lysine methylation	18/2090	47/28891	1.63954e-09	1.14736e-07	8.44247e-08	Hcfc1/Suz12/Ogt/Dot1l/Kmt2a/Ehmt2/Suv39h1/Mcrs1/Setd7/Ehmt1/Kansl1/Kansl3/Nelfa/Setd1a/Smyd2/Kat8/Smyd1/Setmar	18
BP	GO:0061136	regulation of proteasomal protein catabolic process	40/2090	195/28891	1.65003e-09	1.14736e-07	8.44247e-08	Psme1/Ogt/Smarcc1/Bag6/Akt1/Ubqln1/Eif2a/Csnk1d/Usp19/Uchl5/Usp5/Ubqln4/Fmr1/Rbx1/Ubxn1/Bcap31/Mdm2/Rnf40/Ube2k/Axin1/Gsk3a/Herpud1/Gabarap/Desi1/Tlk2/Pithd1/Prkaca/Psmf1/Rnf14/Pkd1/Ubqln2/Alad/Rchy1/Gipc1/Csnk1e/Clec16a/Btrc/Plk2/Rnf144a/Wnt10b	40
BP	GO:0017148	negative regulation of translation	43/2090	220/28891	1.96734e-09	1.35191e-07	9.94754e-08	Pabpc1/Eif4g1/Larp1/Tpr/Khsrp/Eif4enif1/Eif4ebp2/Ago2/Eif4a3/Ifrd2/Upf1/Zc3h12d/Eif2a/Scrib/Zfp598/Fmr1/Fxr1/Pum1/Pnpt1/Ireb2/Eif4ebp1/Paip2/Polr2g/Cnot3/Ago1/Patl1/Dcp1a/Xrn1/Tut7/Tia1/Pcif1/Fto/Mlh1/Dcps/Unk/Rc3h2/Enc1/Mettl3/Lsm1/Zc3h12a/Inpp5e/Rbm4/Grb7	43
BP	GO:0051056	regulation of small GTPase mediated signal transduction	44/2090	230/28891	2.57491e-09	1.74885e-07	1.28683e-07	Arhgdia/Ogt/Rapgef1/Dgkz/Notch1/Myo9b/Cul3/Cdc42se1/Sipa1/Heg1/Notch2/Git1/Cd2ap/Ralgapb/P2ry10/Git2/Madd/Abl1/Gabarap/Icmt/Mfn2/Crk/Tsc2/Spry1/Flcn/Rasa3/Kctd10/Cdon/Arhgap35/Stk19/Fbxo8/Bcr/Sipa1l3/Scai/Dennd1a/Cyth3/Csf1/Bcl6/Gpr55/Itga3/Sipa1l2/Arfgef3/Spry2/Dynlt1a	44
BP	GO:0051648	vesicle localization	42/2090	214/28891	2.6532e-09	1.7813e-07	1.31071e-07	Actn4/Ctbp1/Ctnnb1/Bcl2l1/Rab7/Htt/Pdcd6ip/Sar1a/Cul3/Scrib/Sec16a/Clasp1/Rab11b/Ap3b1/Dctn1/Trappc10/Pdcd6/Madd/Bicdl1/Myo5a/Gbf1/Kifc1/Exoc6/Kif1c/Arfgap2/Pten/Tcirg1/Kif1b/Synj1/Trappc6b/Atp13a2/Trappc9/Eipr1/Bloc1s4/Tmem230/Exoc8/Stard3nl/Wasl/F8a/Fyco1/Tesk1/Sdc1	42
BP	GO:2000819	regulation of nucleotide-excision repair	14/2090	29/28891	2.83102e-09	1.87909e-07	1.38266e-07	Smarcc1/Smarca4/Arid1a/Pbrm1/Smarcc2/Phf10/Actl6a/Dpf2/Arid1b/Smarcd1/Bcl7a/Smarca2/Ercc8/Rad52	14
BP	GO:0006486	protein glycosylation	40/2090	199/28891	3.06476e-09	1.98903e-07	1.46356e-07	Mlec/Mogs/Ogt/St6galnac4/Galnt1/Abca2/Gfpt1/Dad1/Ube2j1/Galnt6/Alg10b/Extl3/Krtcap2/Dpy19l1/Tmem258/Slc35c1/Ext2/Dhdds/Fkrp/Alg5/Galnt7/Golga2/B3galnt2/Xxylt1/Galnt10/Tet2/Pomgnt1/Pmm1/Entpd5/Mgat5/Pofut2/Dpy19l3/St8sia1/Cog7/Slc39a8/Galnt11/B4gat1/St3gal5/Fut7/Pomgnt2	40
BP	GO:0043413	macromolecule glycosylation	40/2090	199/28891	3.06476e-09	1.98903e-07	1.46356e-07	Mlec/Mogs/Ogt/St6galnac4/Galnt1/Abca2/Gfpt1/Dad1/Ube2j1/Galnt6/Alg10b/Extl3/Krtcap2/Dpy19l1/Tmem258/Slc35c1/Ext2/Dhdds/Fkrp/Alg5/Galnt7/Golga2/B3galnt2/Xxylt1/Galnt10/Tet2/Pomgnt1/Pmm1/Entpd5/Mgat5/Pofut2/Dpy19l3/St8sia1/Cog7/Slc39a8/Galnt11/B4gat1/St3gal5/Fut7/Pomgnt2	40
BP	GO:1903320	regulation of protein modification by small protein conjugation or removal	46/2090	249/28891	3.61329e-09	2.31925e-07	1.70654e-07	Huwe1/U2af2/Dnaja1/Wnk1/Ube2i/Ogt/Ndfip1/Ctnnb1/Mycbp2/Akt1/Ubqln1/Cblb/Mta1/Cul3/Paxip1/Traf7/Rbx1/Ubxn1/Xiap/Hdac3/Prmt3/Rnf40/Pdcd6/Axin1/Abl1/Gsk3a/Herpud1/Ubxn2a/Gabarap/Mtbp/Pten/Aimp2/Fanci/Rchy1/Ndfip2/Arnt/Nxn/Cep63/Dcun1d2/Limk1/Mastl/Btrc/Zc3h12a/Ticam1/Hdac8/Spry2	46
BP	GO:0034976	response to endoplasmic reticulum stress	48/2090	266/28891	3.70679e-09	2.35341e-07	1.73168e-07	Eif4g1/Canx/Hsp90b1/Atf4/Bag6/Bcl2l1/Ubqln1/Eif2a/Usp19/Eif2b5/Dnajc3/Tmx1/Ubxn1/Ptpn2/Bcap31/Ube2j1/Sec16a/Ube2j2/Aup1/Ube2k/Erp29/Abl1/Man1a2/Herpud1/Os9/Sec61b/Atf6b/Man1b1/Tmco1/Selenok/Tmem258/Derl2/Ufm1/Atf6/Bcl2l11/Selenos/Ubqln2/Uba5/Bfar/Ermp1/Dnajb12/Bbc3/Creb3/Erlec1/Parp6/Chac1/Fbxo17/Stc2	48
BP	GO:0031400	negative regulation of protein modification process	71/2090	473/28891	3.78378e-09	2.37646e-07	1.74863e-07	Eif4g1/Ywhae/U2af2/Noc2l/Prkar1a/Suz12/Dnaja1/Wnk1/Ogt/Ctnnb1/Akt1/Ptpa/Coro1c/Cblb/Tgfb1/Trim27/Hipk3/Rtraf/Dnajc3/Ikbkb/Heg1/Ggnbp2/Mllt1/Ubxn1/Ptpn2/Ppp2r5d/Prmt3/Crkl/Mprip/Cactin/Cdkn1a/Prkar2a/Arpp19/Ppp1r9b/Fem1a/Hexim1/Abl1/Dbi/Pkn1/Spag9/Tsc2/Pten/Apc/Spry1/Akap1/Rb1/Flcn/Dusp7/Nxn/Akt1s1/Cep63/Chmp6/Limk1/Mgat5/Mastl/Impact/Prkag2/Fbxo7/Zc3h12a/Cdkn2c/Fam72a/Cry2/Tesk1/Dgkq/P3h1/Hdac8/H…	71
BP	GO:0097193	intrinsic apoptotic signaling pathway	55/2090	327/28891	3.91959e-09	2.43557e-07	1.79213e-07	Mybbp1a/Ybx3/Sfpq/Atf4/Noc2l/Dnaja1/Parp1/Bag6/Ctnnb1/Cd44/Akt1/Bcl2l1/Ubqln1/Msh6/Usp15/Hipk1/Rrn3/Ppif/Stk24/Ptpn2/Bcap31/Mdm2/Aen/Uri1/Plscr1/Cdkn1a/Ube2k/Erp29/Herpud1/Tnfrsf1b/Ei24/Snw1/Sgpp1/Ikbke/Selenok/Brca2/Bcl2l11/Mlh1/Eno1b/Selenos/Flcn/Rad9a/Cep63/Phlda3/Usp28/Fbxo7/Bbc3/Mbd4/Creb3/Chac1/Xpa/Gsdme/Wwox/Perp/Eaf2	55
BP	GO:0051650	establishment of vesicle localization	39/2090	193/28891	4.10523e-09	2.52407e-07	1.85725e-07	Actn4/Ctnnb1/Rab7/Htt/Pdcd6ip/Sar1a/Cul3/Scrib/Sec16a/Clasp1/Rab11b/Ap3b1/Dctn1/Trappc10/Pdcd6/Madd/Bicdl1/Myo5a/Gbf1/Kifc1/Exoc6/Kif1c/Arfgap2/Tcirg1/Kif1b/Synj1/Trappc6b/Atp13a2/Trappc9/Eipr1/Bloc1s4/Tmem230/Exoc8/Stard3nl/Wasl/F8a/Fyco1/Tesk1/Sdc1	39
BP	GO:0006367	transcription initiation at RNA polymerase II promoter	26/2090	98/28891	4.35221e-09	2.64805e-07	1.94847e-07	Sub1/Maz/Cand1/Taf1/Paxip1/Med12/Med1/Srf/Med24/Med15/Polr2g/Med25/Gtf2e2/Gtf2a1/Atf7ip/Polr2d/Taf4/Med16/Taf3/Znhit1/Pwwp2a/Med20/Med26/Xpa/Wnt10b/Ctnnbip1	26
BP	GO:0061013	regulation of mRNA catabolic process	38/2090	186/28891	4.69945e-09	2.82984e-07	2.08224e-07	Pabpc1/Hnrnpab/Ptbp1/Hnrnpa0/Larp1/Hnrnpc/Pabpc4/Thrap3/Khsrp/Eif4enif1/Ago2/Eif4a3/Upf1/Zc3h12d/Rbm38/Rbm8a/Fmr1/Fxr1/Pum1/Pnpt1/Casc3/Angel2/Polr2g/Cnot3/Patl1/Ikbke/Dcp1a/Tut7/Fto/Mlh1/Dcps/Rc3h2/Brf1/Mettl3/Lsm1/Dhx34/Zc3h12a/Pcbp4	38
BP	GO:0006479	protein methylation	27/2090	106/28891	5.8e-09	3.422e-07	2.51796e-07	Hcfc1/Suz12/Ogt/Btg1/Dot1l/Kmt2a/Snrpd3/Ehmt2/Prmt7/Carm1/Suv39h1/Prmt3/Mcrs1/Setd7/Ehmt1/Kansl1/Icmt/Kansl3/Nelfa/Rab6a/Setd1a/Smyd2/Kat8/N6amt1/Smyd1/Rab3d/Setmar	27
BP	GO:0008213	protein alkylation	27/2090	106/28891	5.8e-09	3.422e-07	2.51796e-07	Hcfc1/Suz12/Ogt/Btg1/Dot1l/Kmt2a/Snrpd3/Ehmt2/Prmt7/Carm1/Suv39h1/Prmt3/Mcrs1/Setd7/Ehmt1/Kansl1/Icmt/Kansl3/Nelfa/Rab6a/Setd1a/Smyd2/Kat8/N6amt1/Smyd1/Rab3d/Setmar	27
BP	GO:0009048	dosage compensation by inactivation of X chromosome	15/2090	35/28891	5.99594e-09	3.50223e-07	2.57699e-07	Hcfc1/Suz12/Ogt/Exosc10/Rlim/Msl2/Rbm15/Rbm15b/Mcrs1/Kansl1/Kansl3/Jarid2/Mettl3/Kat8/Jpx	15
BP	GO:0034470	ncRNA processing	64/2090	413/28891	6.28866e-09	3.63684e-07	2.67604e-07	Rpl10a/Rps16/Rpl27/Ddx17/Ago2/Akt1/Bop1/Exosc10/Rrp1b/Wbp11/Tgfb1/Nol9/Nat10/Ints7/Tsn/Dis3/Ints1/Usp36/Trnt1/Nol6/Rtraf/Thumpd1/Ddx54/Rrs1/Pelp1/Rrp7a/Pum1/Pnpt1/Wdr46/Bysl/Suv39h1/Grsf1/Dhx37/Drosha/Zc3h7b/Wdr55/Dgcr8/Riok1/Ago1/Ngdn/Tut7/Tarbp1/Pop4/Ctu2/Wdr6/Frg1/Dalrd3/Mettl3/Eri3/Dus2/Tsr3/Trit1/Zc3h10/Mettl5/Tsen34/Elp6/Elp4/Rpp25l/Rnf113a2/Rpusd1/Ctu1/Trmt10b/Dtwd2/Fdxacb1	64
BP	GO:0031396	regulation of protein ubiquitination	41/2090	213/28891	7.36414e-09	4.21705e-07	3.10297e-07	Huwe1/U2af2/Dnaja1/Wnk1/Ogt/Ndfip1/Ctnnb1/Mycbp2/Akt1/Ubqln1/Cblb/Mta1/Cul3/Paxip1/Rbx1/Ubxn1/Xiap/Hdac3/Prmt3/Rnf40/Pdcd6/Axin1/Abl1/Gsk3a/Herpud1/Ubxn2a/Gabarap/Mtbp/Pten/Aimp2/Fanci/Rchy1/Ndfip2/Nxn/Cep63/Limk1/Mastl/Btrc/Ticam1/Hdac8/Spry2	41
BP	GO:0043543	protein acylation	34/2090	158/28891	7.5393e-09	4.27544e-07	3.14593e-07	Mybbp1a/Noc2l/Baz1b/Ogdh/Smarca4/Bag6/Dlst/Nmt1/Tgfb1/Nat10/Zdhhc3/Msl2/Kat6a/Actl6a/Kat2a/Zdhhc6/Golga7/Kansl3/Crebbp/Dip2b/Selenok/Nfyc/Kat14/Zdhhc8/Por/Zdhhc7/Kat5/Naa60/Kat8/Zdhhc16/Zdhhc24/Hdac8/Zdhhc1/Hint2	34
BP	GO:0007265	Ras protein signal transduction	56/2090	342/28891	7.64364e-09	4.29293e-07	3.1588e-07	Arhgdia/Rap1b/Lat/Ogt/Rapgef1/Dgkz/Dbnl/Notch1/Myo9b/Wasf2/Cul3/Cdc42se1/Dhcr24/Heg1/Rhog/Notch2/Git1/Ralgapb/P2ry10/Git2/Madd/Abl1/Was/Gabarap/Icmt/Mfn2/Crk/Spry1/Brap/Celsr1/Flcn/Rasa3/Kctd10/Tiam1/Arhgap35/Stk19/Fbxo8/Bcr/Scai/Dennd1a/Nfix/Rab9/Plk2/Cyth3/Csf1/Bcl6/Gpr55/Rapgef5/Itga3/Cdc42ep3/Arfgef3/Vangl2/Spry2/Dynlt1a/Farp2/Nradd	56
BP	GO:0006790	sulfur compound metabolic process	51/2090	298/28891	7.85897e-09	4.37183e-07	3.21686e-07	Fasn/Dnmt1/Mthfd1/Ogdh/Ctnnb1/Ahcyl1/Acaca/Suclg1/Nubp2/Dlat/Ciapin1/Extl3/Mms19/Mri1/Icmt/Ahcyl2/Mtrr/Chpf/Nubp1/Ext2/Slc35b2/Hsd17b4/Gclm/Ciao1/Slc19a2/Enoph1/Ndst1/Isca2/Hs6st1/Ids/Gcdh/Hgsnat/Slc35d1/Glce/Gpam/Apip/Abcd1/Suox/Idua/Gpc1/Pxylp1/Tpk1/Arsb/Acss1/Ehhadh/Acot6/Slc7a11/Chst14/Vangl2/B4galt4/Arsg	51
BP	GO:0018210	peptidyl-threonine modification	29/2090	122/28891	8.87026e-09	4.88785e-07	3.59655e-07	Eif4g1/Cad/Wnk1/Mapk1/Ogt/Akt1/Tgfb1/Galnt1/Hipk3/Hipk1/Clk1/Galnt6/Ppp2r5d/Ube2k/Axin1/Gsk3a/Stk39/Prkd2/Rptor/Lmtk2/Prkaca/Prkag2/Cdk10/Sbk1/Galnt11/Dgkq/Cdc42bpg/Dyrk3/Spry2	29
BP	GO:0030098	lymphocyte differentiation	71/2090	486/28891	1.19096e-08	6.50132e-07	4.78377e-07	Ndfip1/Smarcc1/Smarca4/Ctnnb1/Cbfb/Cd44/Arid1a/Stat6/Nfatc1/Tgfb1/Pbrm1/Yy1/Kmt2a/Ptk2b/Vav1/Ly9/Bcl11b/Smarcc2/Clptm1/Phf10/Ptpn2/Srf/Notch2/Actl6a/Ctla4/Ap3b1/Kat2a/Drosha/Abl1/Slamf1/Jmjd6/Pou2f2/Lfng/Arid1b/Apc/Patz1/Ambra1/Sh2b3/Rhoh/Tcirg1/Smarcd1/Ptger4/Rc3h2/Kat5/Card11/Mettl3/Armc5/Il15ra/Smarca2/Rnf41/Cmtm7/Hdac5/Lmbr1l/Fbxo7/Zc3h12a/Sox12/Lipa/Myb/Fadd/Klhl25/Cracr2a/Txk/Lig4/Wnt10b/Bc…	71
BP	GO:0010563	negative regulation of phosphorus metabolic process	65/2090	430/28891	1.29409e-08	6.93466e-07	5.10263e-07	Eif4g1/Ywhae/Prkar1a/Suz12/Dnaja1/Wnk1/Parp1/Csk/Ogt/Akt1/Ptpa/Coro1c/Cblb/Tgfb1/Trim27/Hipk3/Rtraf/Dnajc3/Ikbkb/Abca2/Heg1/Ggnbp2/Mllt1/Ptpn2/Uri1/Ppp2r5d/Crkl/Mprip/Cactin/Cdkn1a/Prkar2a/Arpp19/Ppp1r9b/Fem1a/Hexim1/Abl1/Prpsap1/Pkn1/Spag9/Tsc2/Pten/Apc/Spry1/Akap1/Rb1/Flcn/Dusp7/Akt1s1/Chmp6/Mgat5/Mastl/Impact/Prkag2/Fbxo7/Zc3h12a/Cdkn2c/Fam72a/Cry2/Tesk1/Dgkq/Cox11/Prkar2b/Spry2/Ager/Camk2n2	65
BP	GO:0045936	negative regulation of phosphate metabolic process	65/2090	430/28891	1.29409e-08	6.93466e-07	5.10263e-07	Eif4g1/Ywhae/Prkar1a/Suz12/Dnaja1/Wnk1/Parp1/Csk/Ogt/Akt1/Ptpa/Coro1c/Cblb/Tgfb1/Trim27/Hipk3/Rtraf/Dnajc3/Ikbkb/Abca2/Heg1/Ggnbp2/Mllt1/Ptpn2/Uri1/Ppp2r5d/Crkl/Mprip/Cactin/Cdkn1a/Prkar2a/Arpp19/Ppp1r9b/Fem1a/Hexim1/Abl1/Prpsap1/Pkn1/Spag9/Tsc2/Pten/Apc/Spry1/Akap1/Rb1/Flcn/Dusp7/Akt1s1/Chmp6/Mgat5/Mastl/Impact/Prkag2/Fbxo7/Zc3h12a/Cdkn2c/Fam72a/Cry2/Tesk1/Dgkq/Cox11/Prkar2b/Spry2/Ager/Camk2n2	65
BP	GO:0034249	negative regulation of amide metabolic process	44/2090	243/28891	1.46675e-08	7.78844e-07	5.73085e-07	Pabpc1/Eif4g1/Larp1/Tpr/Khsrp/Eif4enif1/Eif4ebp2/Ago2/Eif4a3/Ifrd2/Upf1/Zc3h12d/Eif2a/Scrib/Zfp598/Fmr1/Fxr1/Pum1/Pnpt1/Ireb2/Eif4ebp1/Paip2/Polr2g/Cnot3/Ago1/Patl1/Dcp1a/Xrn1/Tut7/Tia1/Pcif1/Fto/Mlh1/Dcps/Unk/Rc3h2/Enc1/Mettl3/Lsm1/Zc3h12a/Ormdl2/Inpp5e/Rbm4/Grb7	44
BP	GO:0007549	dosage compensation	15/2090	37/28891	1.50484e-08	7.88835e-07	5.80437e-07	Hcfc1/Suz12/Ogt/Exosc10/Rlim/Msl2/Rbm15/Rbm15b/Mcrs1/Kansl1/Kansl3/Jarid2/Mettl3/Kat8/Jpx	15
BP	GO:0016482	cytosolic transport	35/2090	170/28891	1.52608e-08	7.88835e-07	5.80437e-07	Msn/Actr2/Flna/Mapk1/Ezr/Rab7/Trim27/Map2k2/Dnajc13/Ap1g1/Snx1/Dctn1/Trappc10/Gbf1/Vps26b/Spag9/Kif1c/Mtmr2/Ube2o/Lmtk2/Rab6a/Gga1/Stx16/Kif1b/Tbc1d5/Heatr5a/Eipr1/Rab11fip3/Slc30a6/Rab9/Stx8/Ccdc91/Ehd3/Bet1l/Snx16	35
BP	GO:0030010	establishment of cell polarity	35/2090	170/28891	1.52608e-08	7.88835e-07	5.80437e-07	Myh9/Msn/Numa1/Rab10/Htt/Myo9b/Dock8/Ptk2b/Scrib/Sipa1/Mark2/Clasp1/Hdac3/Dctn1/Crkl/Abl1/Gbf1/Crk/Tsc2/Llgl1/Spry1/Tcirg1/Pkd1/Wee1/Kat5/Prkci/Myo18a/Rnf41/Sipa1l3/Gpsm1/Cyth3/Rab11fip2/Vangl2/Spry2/Syne4	35
BP	GO:0010948	negative regulation of cell cycle process	52/2090	314/28891	1.76026e-08	9.01904e-07	6.63634e-07	Baz1b/Tpr/Rad21/Ccng1/Dot1l/Dgkz/Trrap/Brd4/Zc3h12d/Ints7/Rbm38/Ik/Zwint/Clspn/Mapk14/Mdm2/Rbl1/Kat2a/Cdkn1a/Cdc73/Mtbp/Rbbp8/Hsf1/Kifc1/Dlg1/Uimc1/Pten/Apc/Brca2/Nubp1/Chtf18/E2f8/Rb1/Rad9a/Zfp655/Nek1/Znhit1/Hinfp/Haspin/Rbl2/Zfyve19/Fbxo31/Usp28/Xrcc3/Abraxas1/Fbxo7/Mbd4/Xpc/E2f7/Rpl24/Setmar/Apbb2	52
BP	GO:0007163	establishment or maintenance of cell polarity	43/2090	239/28891	2.58412e-08	1.31251e-06	9.65763e-07	Myh9/Msn/Actr2/Ezr/Numa1/Rab10/Htt/Myo9b/Pdcd6ip/Dock8/Ptk2b/Scrib/Sipa1/Mark2/Rhog/Clasp1/Hdac3/Dctn1/Crkl/Abl1/Gbf1/Crk/Tsc2/Dlg1/Apc/Llgl1/Spry1/Tcirg1/Pkd1/Wee1/Kat5/Prkci/Myo18a/Arhgap35/Rnf41/Sipa1l3/Gpsm1/Cyth3/Pard6g/Rab11fip2/Vangl2/Spry2/Syne4	43
BP	GO:0048872	homeostasis of number of cells	61/2090	401/28891	2.83837e-08	1.42696e-06	1.04998e-06	Mthfd1/Ubap2l/Lat/Ptbp3/Tnfrsf4/Smarca4/Cd44/Akt1/Notch1/Tgfb1/Kmt2a/Rrn3/Med1/Ikbkb/Ptpn2/Mapk14/Zfpm1/Srf/Xiap/Ireb2/Ap3b1/Axin1/Abl1/Jmjd6/Ncstn/Pkn1/Rcor1/Exoc6/Foxo3/Zfx/Sh2b3/Bcl2l11/Arid4a/Tcirg1/Rb1/Setd1a/Rc3h2/Atxn2/Uba5/Tet2/Card11/Znhit1/Smarca2/Bcr/Fech/Tgfbr3/Nfix/Lipa/Myb/Smap1/Fadd/Gpam/Fancc/Csf1/Afdn/Dyrk3/Bcl6/Acvr2a/Slc7a11/P4htm/Gata1	61
BP	GO:0043487	regulation of RNA stability	36/2090	182/28891	2.85832e-08	1.42696e-06	1.04998e-06	Pabpc1/Ptbp1/Hnrnpa0/Larp1/Hnrnpc/Pabpc4/Thrap3/Khsrp/Eif4enif1/Ago2/Upf1/Zc3h12d/Rbm38/Zc3h18/Fmr1/Fxr1/Pum1/Pnpt1/Angel2/Polr2g/Cnot3/Tnfrsf1b/Patl1/Ikbke/Dcp1a/Tut7/Fto/Mlh1/Dcps/Phax/Rc3h2/Brf1/Mettl3/Lsm1/Zc3h12a/Pcbp4	36
BP	GO:0016571	histone methylation	18/2090	55/28891	2.95468e-08	1.46257e-06	1.07618e-06	Hcfc1/Suz12/Ogt/Dot1l/Kmt2a/Ehmt2/Suv39h1/Mcrs1/Setd7/Ehmt1/Kansl1/Kansl3/Nelfa/Setd1a/Smyd2/Kat8/Smyd1/Setmar	18
BP	GO:2000058	regulation of ubiquitin-dependent protein catabolic process	35/2090	175/28891	3.30847e-08	1.62393e-06	1.19491e-06	Ogt/Smarcc1/Bag6/Akt1/Ubqln1/Csnk1d/Ptk2b/Uchl5/Usp5/Ubqln4/Traf7/Rbx1/Ubxn1/Bcap31/Mdm2/Ube2k/Axin1/Gsk3a/Herpud1/Gabarap/Desi1/Tlk2/Tmem168/Pten/Rnf14/Ubqln2/Rchy1/Sufu/Agtpbp1/Gipc1/Csnk1e/Clec16a/Plk2/Rnf144a/Wnt10b	35
BP	GO:0009895	negative regulation of catabolic process	55/2090	349/28891	4.00353e-08	1.94872e-06	1.43389e-06	Eif4g1/Hnrnpab/Ptbp1/Hnrnpa0/Larp1/Hnrnpc/Thrap3/Flna/Wnk1/Eif4enif1/Ogt/Smarcc1/Bag6/Mycbp2/Akt1/Rbm38/Trim27/Foxk2/Usp36/Usp19/Uchl5/Ehmt2/Ubqln4/Fmr1/Ubxn1/Git1/Foxk1/Angel2/Ikbke/Dbi/Sec22b/Tlk2/Tsc2/Mtmr2/Rptor/Prkaca/Psmf1/Wdr6/Phax/Alad/Golga2/Zdhhc7/Flcn/Sufu/Mtmr9/Gipc1/Dhx34/Rnf41/Clec16a/Mfsd2a/Crtc3/Dapl1/Qsox1/Sik2/Atraid	55
BP	GO:0018105	peptidyl-serine phosphorylation	53/2090	331/28891	4.10397e-08	1.9811e-06	1.45772e-06	Eif4g1/Wnk1/Mapk1/Ogt/Pak2/Cd44/Akt1/Uhmk1/Tgfb1/Csnk1d/Hipk3/Hipk1/Map2k2/Clk1/Rps6ka1/Ikbkb/Ggnbp2/Clspn/Hax1/Rps6ka3/Mapk14/Vrk1/Mark2/Tlk1/Axin1/Gsk3a/Mast3/Mast2/Cdc7/Stk39/Prkd2/Ikbke/Mark3/Pkn1/Tlk2/Pten/Rptor/Lmtk2/Prkaca/Pkd1/Prkci/Csnk1e/Mknk1/Hdac6/Mastl/Plk2/Sbk1/Dgkq/Mtcp1/Dyrk3/Dclk1/Spry2/Pfn2	53
BP	GO:0072331	signal transduction by p53 class mediator	32/2090	153/28891	4.20716e-08	2.01427e-06	1.48213e-06	Rps20/Mybbp1a/Bag6/Cd44/Bop1/Usp15/Rbm38/Hipk1/Rrs1/Paxip1/Usp10/Rrn3/Mdm2/Aen/Pak1ip1/Cdkn1a/Hexim1/Snw1/Foxo3/Brca2/Smyd2/Kat5/Cep63/Znhit1/Phlda3/Usp28/Bbc3/Pcbp4/E2f7/Wwox/Dyrk3/Perp	32
BP	GO:0000819	sister chromatid segregation	40/2090	218/28891	4.47673e-08	2.1259e-06	1.56427e-06	Flna/Baz1b/Tpr/Rad21/Nudc/Smarcc1/Smarca4/Arid1a/Numa1/Cul3/Pbrm1/Ik/Zwint/Rrs1/Smarcc2/Phf10/Stag1/Clasp1/Actl6a/Dpf2/Ino80/Arid1b/Kifc1/Apc/Kif2a/Mzt1/Rb1/Smarcd1/Golga2/Psrc1/Kat5/Chmp5/Haspin/Bcl7a/Chmp6/Smarca2/Nsmce2/Xrcc3/Abraxas1/Map10	40
BP	GO:0031056	regulation of histone modification	16/2090	45/28891	4.56109e-08	2.14849e-06	1.58089e-06	Mybbp1a/Hcfc1/Noc2l/Baz1b/Ogt/Tgfb1/Ehmt2/Suv39h1/Mcrs1/Ehmt1/Kansl1/Kansl3/Nfyc/Nelfa/Kat8/Hdac8	16
BP	GO:0015931	nucleobase-containing compound transport	38/2090	202/28891	4.86776e-08	2.27461e-06	1.67369e-06	Nup210/Tpr/Khsrp/Wnk1/Khdrbs1/Eif4a3/Slbp/Nup188/Htt/Nup93/Pom121/Nol6/Rbm8a/Sec13/Nup214/Sidt2/Fmr1/Nup133/Pnpt1/Rbm15b/Casc3/Hsf1/Lrrc8c/Slc35c1/Slc35b2/Slc35b1/Abcc5/Phax/Slc29a3/Abcc4/Slc28a2/Slc35d1/Slc33a1/Ank/Zc3h11a/Zc3h3/Arc/Tst	38
BP	GO:0018209	peptidyl-serine modification	54/2090	343/28891	5.48492e-08	2.54265e-06	1.87092e-06	Eif4g1/Wnk1/Mapk1/Ogt/Pak2/Cd44/Akt1/Uhmk1/Tgfb1/Galnt1/Csnk1d/Hipk3/Hipk1/Map2k2/Clk1/Rps6ka1/Ikbkb/Ggnbp2/Clspn/Hax1/Rps6ka3/Mapk14/Vrk1/Mark2/Tlk1/Axin1/Gsk3a/Mast3/Mast2/Cdc7/Stk39/Prkd2/Ikbke/Mark3/Pkn1/Tlk2/Pten/Rptor/Lmtk2/Prkaca/Pkd1/Prkci/Csnk1e/Mknk1/Hdac6/Mastl/Plk2/Sbk1/Dgkq/Mtcp1/Dyrk3/Dclk1/Spry2/Pfn2	54
BP	GO:0060260	regulation of transcription initiation by RNA polymerase II	21/2090	76/28891	6.07747e-08	2.79516e-06	2.05672e-06	Sub1/Cand1/Paxip1/Med12/Med1/Srf/Med24/Med15/Med25/Gtf2a1/Atf7ip/Taf4/Med16/Taf3/Znhit1/Pwwp2a/Med20/Med26/Xpa/Wnt10b/Ctnnbip1	21
BP	GO:0051258	protein polymerization	47/2090	282/28891	6.87859e-08	3.13889e-06	2.30965e-06	Fkbp4/Capzb/Sptan1/Cotl1/Numa1/Vasp/Dbnl/Mtpn/Diaph1/Gpx4/Csnk1d/Ptk2b/Arpc4/Evl/Hax1/Clasp1/Git1/Clip1/Nin/Dctn1/Ssh2/Ube2k/Tbcd/Abl1/Was/Capn1/Rasa1/Dlg1/Apc/Ambra1/Tubgcp6/Mzt1/Hdgfl3/Golga2/Psrc1/Camsap1/Slain1/Gba2/Eml2/Spire1/Ttc17/Wasl/Kank3/Cdc42ep3/Cttn/Fes/Pfn2	47
BP	GO:0070316	regulation of G0 to G1 transition	14/2090	36/28891	8.54578e-08	3.86945e-06	2.8472e-06	Smarcc1/Smarca4/Arid1a/Pbrm1/Smarcc2/Med1/Phf10/Actl6a/Dpf2/Arid1b/Smarcd1/Znhit1/Bcl7a/Smarca2	14
BP	GO:0043488	regulation of mRNA stability	33/2090	166/28891	9.38356e-08	4.2161e-06	3.10227e-06	Pabpc1/Ptbp1/Hnrnpa0/Larp1/Hnrnpc/Pabpc4/Thrap3/Khsrp/Eif4enif1/Ago2/Upf1/Zc3h12d/Rbm38/Fmr1/Fxr1/Pum1/Pnpt1/Angel2/Polr2g/Cnot3/Patl1/Ikbke/Dcp1a/Tut7/Fto/Mlh1/Dcps/Rc3h2/Brf1/Mettl3/Lsm1/Zc3h12a/Pcbp4	33
BP	GO:0046578	regulation of Ras protein signal transduction	37/2090	199/28891	9.93525e-08	4.42991e-06	3.25959e-06	Arhgdia/Ogt/Rapgef1/Dgkz/Notch1/Myo9b/Cul3/Cdc42se1/Heg1/Notch2/Git1/P2ry10/Git2/Madd/Abl1/Gabarap/Icmt/Mfn2/Crk/Spry1/Flcn/Rasa3/Kctd10/Arhgap35/Stk19/Fbxo8/Bcr/Scai/Dennd1a/Cyth3/Csf1/Bcl6/Gpr55/Itga3/Arfgef3/Spry2/Dynlt1a	37
BP	GO:0018107	peptidyl-threonine phosphorylation	26/2090	113/28891	1.03473e-07	4.57867e-06	3.36905e-06	Eif4g1/Cad/Wnk1/Mapk1/Ogt/Akt1/Tgfb1/Hipk3/Hipk1/Clk1/Ppp2r5d/Ube2k/Axin1/Gsk3a/Stk39/Prkd2/Rptor/Lmtk2/Prkaca/Prkag2/Cdk10/Sbk1/Dgkq/Cdc42bpg/Dyrk3/Spry2	26
BP	GO:2000142	regulation of DNA-templated transcription initiation	22/2090	85/28891	1.06974e-07	4.69802e-06	3.45687e-06	Sub1/Cand1/Paxip1/Med12/Rrn3/Med1/Srf/Med24/Med15/Med25/Gtf2a1/Atf7ip/Taf4/Med16/Taf3/Znhit1/Pwwp2a/Med20/Med26/Xpa/Wnt10b/Ctnnbip1	22
BP	GO:0065004	protein-DNA complex assembly	34/2090	176/28891	1.24779e-07	5.429e-06	3.99474e-06	Mcm2/Brd2/Hjurp/Smarca4/Cand1/Dnajc9/Taf1/Med1/Cdc45/Kat6a/Chaf1a/Med24/Med15/Med25/Asf1b/Gtf2a1/Atf7ip/Rsf1/Taf4/Brf1/Naa60/Cenpn/Med16/Taf3/Med20/Smarca2/Oip5/H1f0/Med26/Rad52/Wnt10b/Rad51c/Tspyl4/H3f3c	34
BP	GO:0032786	positive regulation of DNA-templated transcription, elongation	19/2090	66/28891	1.25478e-07	5.429e-06	3.99474e-06	Parp1/Ctnnb1/Brd4/Supt5/Med1/Cdk13/Med24/Med15/Ccnt2/Cdc73/Med25/Ccnk/Supt4a/Leo1/Med16/Eapp/Pwwp2a/Med20/Med26	19
BP	GO:0043254	regulation of protein-containing complex assembly	63/2090	437/28891	1.27054e-07	5.45679e-06	4.01519e-06	Lcp1/Eif4g1/Msn/Fkbp4/Hcfc1/Capzb/Hjurp/Sptan1/Cotl1/Cand1/Numa1/Vasp/Dbnl/Mtpn/Tgfb1/Sar1a/Ptk2b/Ncln/Piezo1/Evl/Hax1/Ice1/Git1/Clip1/Eif4ebp1/Dctn1/Ssh2/Tbcd/Abl1/Jmjd6/Med25/Capn1/Ikbke/Rasa1/Hsf1/Atf7ip/Dlg1/Apc/Ambra1/Tfip11/Bcl2l11/Ptger4/Stxbp5/Psrc1/Camsap1/Slain1/Gba2/Eml2/Hdac6/Bbc3/Ankra2/Ticam1/Trim65/Wnt10b/Kank3/Zdhhc1/Cdc42ep3/Ctnnbip1/Cttn/Farp2/Lcat/Fes/Pfn2	63
BP	GO:1903313	positive regulation of mRNA metabolic process	30/2090	145/28891	1.41566e-07	6.03567e-06	4.44113e-06	Pabpc1/Thrap3/Snrnp70/Khsrp/Eif4enif1/Ago2/Dazap1/Eif4a3/Upf1/Zc3h12d/Sf3b4/Fxr1/Pum1/Pnpt1/Cdc73/Polr2g/Cnot3/Snw1/Patl1/Dcp1a/Tut7/Fto/Mlh1/Dcps/Rc3h2/Leo1/Mettl3/Lsm1/Zfp64/Zc3h12a	30
BP	GO:1901988	negative regulation of cell cycle phase transition	45/2090	271/28891	1.44624e-07	6.12135e-06	4.50418e-06	Tpr/Rad21/Ccng1/Dot1l/Dgkz/Trrap/Brd4/Zc3h12d/Ints7/Rbm38/Ik/Zwint/Clspn/Mapk14/Mdm2/Rbl1/Cdkn1a/Cdc73/Mtbp/Rbbp8/Hsf1/Dlg1/Uimc1/Pten/Apc/Brca2/Rb1/Rad9a/Zfp655/Nek1/Hinfp/Haspin/Rbl2/Zfyve19/Fbxo31/Usp28/Xrcc3/Abraxas1/Fbxo7/Mbd4/Xpc/E2f7/Rpl24/Setmar/Apbb2	45
BP	GO:1902105	regulation of leukocyte differentiation	55/2090	363/28891	1.53217e-07	6.4384e-06	4.73747e-06	Ndfip1/Smarcc1/Smarca4/Ctnnb1/Cbfb/Cd44/Arid1a/Tgfb1/Pbrm1/Smarcc2/Clptm1/Phf10/Hax1/Ptpn2/Zfpm1/Notch2/Actl6a/Ctla4/Ap3b1/Kat2a/Drosha/Abl1/Arid1b/Hsf1/Apc/Rptor/Gnas/Ambra1/Sh2b3/Rhoh/Rb1/Smarcd1/Rc3h2/Kat5/Tmem64/Card11/Mettl3/Tfe3/Il15ra/Smarca2/Rnf41/Fbxo7/Zc3h12a/Sox12/Fadd/Klhl25/Csf1/Wnt10b/Gpr137/Bcl6/Gpr55/Ctnnbip1/Ager/Fes/Cd1d1	55
BP	GO:0043087	regulation of GTPase activity	53/2090	345/28891	1.63223e-07	6.80991e-06	5.01083e-06	Rcc2/Eif5/Rangap1/Wnk1/Rapgef1/Zc3h15/Coro1c/Rrp1b/Myo9b/Cblb/Dock8/Ptk2b/Scrib/Sipa1/Vav1/Rhog/Crkl/Ralgapb/Rasa1/Crk/Agap3/Tbc1d13/Tsc2/Gnas/Spry1/Tbc1d9b/Tbc1d5/Asap1/Rasa3/Trappc6b/Arhgap27/Tiam1/Tbc1d2b/Arhgap35/Plxna1/Vav3/Bcr/Sipa1l3/Dennd1a/Sgsm3/Gpsm1/Tbc1d30/Tbc1d8b/Rab11fip2/Bcl6/Plekhg4/Rapgef5/Sipa1l2/Mex3b/Tbc1d16/Arhgap29/Spry2/Dynlt1a	53
BP	GO:1900095	regulation of dosage compensation by inactivation of X chromosome	9/2090	15/28891	1.78859e-07	7.38004e-06	5.43035e-06	Hcfc1/Ogt/Rlim/Msl2/Mcrs1/Kansl1/Kansl3/Kat8/Jpx	9
BP	GO:0032386	regulation of intracellular transport	53/2090	346/28891	1.79416e-07	7.38004e-06	5.43035e-06	Lcp1/Ywhae/Msn/Trim28/Flna/Tpr/Rangap1/Wnk1/Mapk1/Khdrbs1/Ogt/Ezr/Dync1h1/Numa1/Nefh/Uhmk1/Tgfb1/Sar1a/Nup214/Map2k2/Dnajc13/Ppp1r12a/Abca2/Mapk14/Bcap31/Mdm2/Ube2j1/Pcnt/Nucb1/Ice1/Hdac3/Rab11b/Gdi1/Emd/Rbm22/Gsk3a/Os9/Ei24/Mtmr2/Prkaca/Derl2/Ufm1/Akap1/Atp13a2/Eipr1/Rab11fip3/Zc3h12a/Bbc3/Erlec1/Arv1/Rab23/Cep131/Rbm4	53
BP	GO:0051170	import into nucleus	35/2090	187/28891	1.84187e-07	7.52333e-06	5.53578e-06	Trim28/Flna/Phb2/Tpr/Eif4enif1/Mapk1/Akt1/Kpna4/Nup188/Notch1/Tgfb1/Ipo9/Nup93/Pom121/Sec13/Nup214/Med1/Nup133/Mapk14/Hdac3/Cdkn1a/Rbm22/Ei24/Ipo8/Agap3/Fam53b/Tsc2/Ufm1/Ipo13/Akap1/Hikeshi/Zc3h12a/Prkag1/Cry2/Rab23	35
BP	GO:0045023	G0 to G1 transition	14/2090	38/28891	1.89634e-07	7.69205e-06	5.65992e-06	Smarcc1/Smarca4/Arid1a/Pbrm1/Smarcc2/Med1/Phf10/Actl6a/Dpf2/Arid1b/Smarcd1/Znhit1/Bcl7a/Smarca2	14
BP	GO:0007033	vacuole organization	39/2090	221/28891	1.91092e-07	7.69773e-06	5.6641e-06	Atp2a2/B4galnt1/Rab7/Ubqln1/Ehmt2/Ap3b1/Pip4k2b/Wipi2/Ubxn2a/Gabarap/Man2a1/Trp53inp1/Mfn2/Sec22b/Lyst/Ambra1/Tcirg1/Pacs2/Gaa/Ubqln2/Flcn/Chmp5/Atg2a/Tfe3/Spns1/Pik3c2a/Atp13a2/Chmp6/Tmem199/Lipa/Vps18/Atg9b/Idua/Rab23/Wdr45/Trp53inp2/Rab19/Rab43/Efnb1	39
BP	GO:0072594	establishment of protein localization to organelle	64/2090	452/28891	1.9641e-07	7.85774e-06	5.78184e-06	Trim28/Flna/Rab8b/Phb2/Tpr/Dnaja1/Eif4enif1/Mapk1/Bag6/Akt1/Kpna4/Rab10/Nup188/Notch1/Rab7/Tgfb1/Spcs2/Ipo9/Nup93/Pom121/Sec13/Scrib/Nup214/Med1/Nup133/Pmpca/Mapk14/Bcap31/Hdac3/Ap3b1/Cdkn1a/Rbm22/Gsk3a/Herpud1/Mtch1/Ei24/Sec61b/Ipo8/Mfn2/Agap3/Fam53b/Tsc2/Aip/Brca2/Ufm1/Ipo13/Akap1/Pex6/Vps13d/Hikeshi/Mon1b/Vps8/Srprb/Grpel2/Fbxo7/Zc3h12a/Bbc3/Sec61a2/Cry2/Trmt10b/Rab23/Srp54a/Snx16/Cd68	64
BP	GO:0009314	response to radiation	62/2090	433/28891	2.0351e-07	8.08641e-06	5.9501e-06	Noc2l/Ppp1ca/Parp1/Sdf4/Akt1/Bcl2l1/Htt/Msh6/Tgfb1/Mta1/Ints7/Yy1/Kmt2a/Paxip1/Nptn/Cdc25a/Rbx1/Mapk14/Mdm2/Aen/Cdkn1a/Ino80/Dynlrb1/Ei24/Ric8a/Cep250/Trp53inp1/Hsf1/Agap3/Tlk2/Uimc1/Crebbp/Brca2/Rnf168/Kat5/Rad9a/Mettl3/Ube2a/Nek1/Polk/Fancg/Ercc8/Ercc4/Usp28/Fech/Crtc1/Abraxas1/Mapk11/Bbc3/Mbd4/Xpc/Primpol/Idua/Cry2/Xpa/Lig4/Rnf8/Rbm4/Slc7a11/Hrh2/Trpm1/Opn3	62
BP	GO:0051983	regulation of chromosome segregation	28/2090	132/28891	2.11538e-07	8.3486e-06	6.14302e-06	Rcc2/Tpr/Rad21/Smarcc1/Smarca4/Arid1a/Numa1/Cul3/Pbrm1/Ik/Zwint/Smarcc2/Phf10/Pum1/Actl6a/Plscr1/Dpf2/Arid1b/Apc/Chtf18/Rb1/Smarcd1/Kat5/Haspin/Bcl7a/Smarca2/Nsmce2/Xrcc3	28
BP	GO:0009451	RNA modification	31/2090	156/28891	2.2916e-07	8.9834e-06	6.61012e-06	Hnrnpab/Hnrnpc/Akt1/Nat10/Thumpd1/Rbm15/Rbm15b/Zc3h13/Jmjd6/Mepce/Tarbp1/Pcif1/Fto/Ctu2/Wdr6/Dalrd3/Mettl3/Dus2/Tsr3/Trit1/Mettl5/Elp6/Elp4/Cbll1/Rpusd1/Ctu1/Trmt10b/Dtwd2/Fdxacb1/Rpusd3/Cmtr1	31
BP	GO:0071214	cellular response to abiotic stimulus	52/2090	340/28891	2.45281e-07	9.43136e-06	6.93974e-06	Arhgdia/Ybx3/Atp1a1/Noc2l/Wnk1/Parp1/Ctnnb1/Akt1/Bcl2l1/Tgfb1/Ints7/Usp15/Yy1/Got1/Sipa1/Piezo1/Cdc25a/Rbx1/Letm1/Mapk14/Mdm2/Rab11b/Cdkn1a/Ino80/Stk39/Ei24/Trp53inp1/Hsf1/Agap3/Tlk2/Pten/Crebbp/Rptor/Brca2/Lrrc8c/Ptger4/Rnf168/Rad9a/Mettl3/Lrrc8d/Polk/Micu1/Ercc4/Usp28/Mapk11/Bbc3/Xpc/Xpa/Lig4/Pkd1l3/Trpm1/Opn3	52
BP	GO:0104004	cellular response to environmental stimulus	52/2090	340/28891	2.45281e-07	9.43136e-06	6.93974e-06	Arhgdia/Ybx3/Atp1a1/Noc2l/Wnk1/Parp1/Ctnnb1/Akt1/Bcl2l1/Tgfb1/Ints7/Usp15/Yy1/Got1/Sipa1/Piezo1/Cdc25a/Rbx1/Letm1/Mapk14/Mdm2/Rab11b/Cdkn1a/Ino80/Stk39/Ei24/Trp53inp1/Hsf1/Agap3/Tlk2/Pten/Crebbp/Rptor/Brca2/Lrrc8c/Ptger4/Rnf168/Rad9a/Mettl3/Lrrc8d/Polk/Micu1/Ercc4/Usp28/Mapk11/Bbc3/Xpc/Xpa/Lig4/Pkd1l3/Trpm1/Opn3	52
BP	GO:0045663	positive regulation of myoblast differentiation	16/2090	50/28891	2.45432e-07	9.43136e-06	6.93974e-06	Btg1/Smarcc1/Smarca4/Arid1a/Pbrm1/Smarcc2/Phf10/Mapk14/Actl6a/Arid1b/Smarcd1/Kat5/Nr2c2/Cdon/Smarca2/Smyd1	16
BP	GO:0006606	protein import into nucleus	34/2090	182/28891	2.87043e-07	1.09583e-05	8.06327e-06	Trim28/Flna/Phb2/Tpr/Eif4enif1/Mapk1/Akt1/Kpna4/Nup188/Notch1/Tgfb1/Ipo9/Nup93/Pom121/Sec13/Nup214/Med1/Nup133/Mapk14/Hdac3/Cdkn1a/Rbm22/Ei24/Ipo8/Agap3/Fam53b/Tsc2/Ufm1/Ipo13/Akap1/Hikeshi/Zc3h12a/Cry2/Rab23	34
BP	GO:0000380	alternative mRNA splicing, via spliceosome	20/2090	76/28891	2.99095e-07	1.12667e-05	8.29024e-06	Ptbp1/Hnrnpl/Hnrnpm/Sfpq/Thrap3/Rbm25/Khdrbs1/Rnps1/Ddx17/Celf2/Puf60/Rbm8a/Fmr1/Fxr1/Cdk13/Rbm15/Rbm15b/Tia1/Slu7/Rbm4	20
BP	GO:0032434	regulation of proteasomal ubiquitin-dependent protein catabolic process	29/2090	142/28891	3.0361e-07	1.12667e-05	8.29024e-06	Ogt/Smarcc1/Bag6/Akt1/Ubqln1/Csnk1d/Uchl5/Usp5/Ubqln4/Rbx1/Ubxn1/Bcap31/Mdm2/Ube2k/Axin1/Gsk3a/Herpud1/Gabarap/Desi1/Tlk2/Rnf14/Ubqln2/Rchy1/Gipc1/Csnk1e/Clec16a/Plk2/Rnf144a/Wnt10b	29
BP	GO:0018022	peptidyl-lysine methylation	18/2090	63/28891	3.03688e-07	1.12667e-05	8.29024e-06	Hcfc1/Suz12/Ogt/Dot1l/Kmt2a/Ehmt2/Suv39h1/Mcrs1/Setd7/Ehmt1/Kansl1/Kansl3/Nelfa/Setd1a/Smyd2/Kat8/Smyd1/Setmar	18
BP	GO:0051348	negative regulation of transferase activity	43/2090	260/28891	3.0393e-07	1.12667e-05	8.29024e-06	Prkar1a/Dnaja1/Wnk1/Csk/Akt1/Coro1c/Cblb/Trim27/Hipk3/Rtraf/Dnajc3/Heg1/Ggnbp2/Mllt1/Ptpn2/Cdkn1a/Prkar2a/Mcrs1/Fem1a/Hexim1/Abl1/Gsk3a/Setd7/Prpsap1/Pkn1/Tsc2/Pten/Apc/Spry1/Rb1/Dusp7/Akt1s1/Chmp6/Limk1/Prkag2/Fbxo7/Cdkn2c/Fam72a/Tesk1/Cox11/Prkar2b/Spry2/Camk2n2	43
BP	GO:0005996	monosaccharide metabolic process	46/2090	287/28891	3.04767e-07	1.12667e-05	8.29024e-06	Atf4/Mdh2/Ogt/Akt1/Foxk2/Got1/Fabp5/Ptpn2/Mapk14/Dlat/Kat2a/Foxk1/Arpp19/Adpgk/Gpd2/Man2a1/Man2c1/Bckdk/Prkaca/Hectd4/Nr3c1/Eno1b/Slc23a2/Fkrp/Kbtbd2/Glb1/Acadm/Galk2/Man2b2/Pmm1/Gpt2/Pgm2l1/Ids/Pofut2/Oma1/Lipa/Idua/Ppp1r3e/Dgkq/B3glct/Cox11/Arsb/Slc2a8/Gpt/Sord/Chst14	46
BP	GO:0033673	negative regulation of kinase activity	39/2090	225/28891	3.0933e-07	1.13635e-05	8.36143e-06	Prkar1a/Dnaja1/Wnk1/Csk/Akt1/Coro1c/Cblb/Trim27/Hipk3/Rtraf/Dnajc3/Heg1/Ggnbp2/Mllt1/Ptpn2/Cdkn1a/Prkar2a/Fem1a/Hexim1/Abl1/Prpsap1/Pkn1/Tsc2/Pten/Apc/Spry1/Rb1/Dusp7/Akt1s1/Chmp6/Prkag2/Fbxo7/Cdkn2c/Fam72a/Tesk1/Cox11/Prkar2b/Spry2/Camk2n2	39
BP	GO:0030071	regulation of mitotic metaphase/anaphase transition	22/2090	90/28891	3.17308e-07	1.15837e-05	8.52348e-06	Tpr/Rad21/Smarcc1/Smarca4/Arid1a/Cul3/Pbrm1/Ik/Zwint/Smarcc2/Phf10/Actl6a/Dpf2/Arid1b/Apc/Rb1/Smarcd1/Haspin/Bcl7a/Smarca2/Nsmce2/Xrcc3	22
BP	GO:0045947	negative regulation of translational initiation	10/2090	20/28891	3.61781e-07	1.31252e-05	9.65774e-06	Larp1/Tpr/Eif4ebp2/Ago2/Scrib/Zfp598/Fmr1/Eif4ebp1/Paip2/Rbm4	10
BP	GO:0050863	regulation of T cell activation	59/2090	411/28891	3.64347e-07	1.31367e-05	9.66621e-06	Prkar1a/Csk/Lat/Ndfip1/Smarcc1/Smarca4/Ctnnb1/Cbfb/Cd44/Arid1a/Il12rb1/Cblb/Tgfb1/Zc3h12d/Dock8/Pbrm1/Scrib/Smarcc2/Clptm1/Phf10/Ptpn2/Actl6a/Ctla4/Ap3b1/Kat2a/Drosha/Abl1/Slamf1/Tnfrsf1b/Arid1b/Tsc2/Dlg1/Pten/Tyk2/Selenok/Ambra1/Sh2b3/Rhoh/Smarcd1/Rc3h2/Kat5/Card11/Mettl3/Pag1/Znhit1/Smarca2/Dapl1/Tnfrsf14/Zc3h12a/Sox12/Fadd/Klhl25/Gpam/Tnfrsf21/Wnt10b/Bcl6/Ager/Efnb1/Cd1d1	59
BP	GO:0022411	cellular component disassembly	64/2090	462/28891	4.32376e-07	1.5461e-05	1.13765e-05	Lcp1/Huwe1/Phb2/Atp2a2/Arhgef1/Capzb/Wnk1/Sptan1/Ogt/Smarcc1/Smarca4/Arid1a/Mtpn/Ubqln1/Htt/Upf1/Ubqln4/Evl/Smarcc2/Scaf4/Vrk1/Clasp1/Dctn1/Gsk3a/Map1s/Cisd2/Wipi2/Gabarap/Gbf1/Mfn2/Hsf1/Nsf/Apc/Ambra1/Tfip11/Ufm1/Pym1/Specc1l/Vps13d/Smarcd1/Hdgfl3/Golga2/Kat5/Camsap1/Chmp5/Uba5/Synj1/Atg2a/Tex264/Chmp6/Tecpr1/Rnf41/Hdac6/Clec16a/Exoc8/Fbxo7/Atg9b/Fyco1/Wdr47/Dyrk3/Wdr45/Pelo/Sh3gl3/Cttn	64
BP	GO:0033045	regulation of sister chromatid segregation	24/2090	106/28891	4.34106e-07	1.5461e-05	1.13765e-05	Tpr/Rad21/Smarcc1/Smarca4/Arid1a/Numa1/Cul3/Pbrm1/Ik/Zwint/Smarcc2/Phf10/Actl6a/Dpf2/Arid1b/Apc/Rb1/Smarcd1/Kat5/Haspin/Bcl7a/Smarca2/Nsmce2/Xrcc3	24
BP	GO:1903008	organelle disassembly	28/2090	137/28891	4.74709e-07	1.68047e-05	1.23652e-05	Huwe1/Phb2/Ogt/Htt/Vrk1/Gsk3a/Cisd2/Wipi2/Gabarap/Gbf1/Mfn2/Ambra1/Ufm1/Vps13d/Golga2/Kat5/Uba5/Atg2a/Tex264/Rnf41/Hdac6/Clec16a/Fbxo7/Atg9b/Dyrk3/Wdr45/Pelo/Cttn	28
BP	GO:0032886	regulation of microtubule-based process	43/2090	265/28891	5.19153e-07	1.82673e-05	1.34413e-05	Fkbp4/Tpr/Dync1h1/Numa1/Nefh/Pdcd6ip/Nat10/Diaph1/Ccnl1/Mark2/Clasp1/Git1/Clip1/Dctn1/Kat2a/Tbcd/Abl1/Map1s/Kifc1/Apc/Nubp1/Specc1l/Pkd1/Hdgfl3/Fbxw5/Psrc1/Camsap1/Chmp5/Slain1/Cep76/Gba2/Chmp6/Eml2/Hdac6/Xrcc3/Alms1/Plk2/Wdr47/Phldb1/Cep131/Bbs2/Map10/Fes	43
BP	GO:0031330	negative regulation of cellular catabolic process	35/2090	195/28891	5.23914e-07	1.83244e-05	1.34834e-05	Eif4g1/Hnrnpab/Ptbp1/Hnrnpa0/Larp1/Hnrnpc/Thrap3/Wnk1/Eif4enif1/Akt1/Rbm38/Trim27/Foxk2/Usp36/Ehmt2/Ubqln4/Fmr1/Foxk1/Angel2/Ikbke/Dbi/Sec22b/Tsc2/Mtmr2/Rptor/Wdr6/Phax/Golga2/Mtmr9/Dhx34/Rnf41/Clec16a/Mfsd2a/Dapl1/Qsox1	35
BP	GO:1902099	regulation of metaphase/anaphase transition of cell cycle	22/2090	93/28891	5.83484e-07	2.02865e-05	1.49271e-05	Tpr/Rad21/Smarcc1/Smarca4/Arid1a/Cul3/Pbrm1/Ik/Zwint/Smarcc2/Phf10/Actl6a/Dpf2/Arid1b/Apc/Rb1/Smarcd1/Haspin/Bcl7a/Smarca2/Nsmce2/Xrcc3	22
BP	GO:0032968	positive regulation of transcription elongation by RNA polymerase II	16/2090	53/28891	6.00969e-07	2.07708e-05	1.52834e-05	Ctnnb1/Brd4/Med1/Cdk13/Med24/Med15/Ccnt2/Cdc73/Med25/Ccnk/Leo1/Med16/Eapp/Pwwp2a/Med20/Med26	16
BP	GO:0042254	ribosome biogenesis	49/2090	322/28891	6.26293e-07	2.15187e-05	1.58338e-05	Rps3a1/Rpl10a/Rps16/Mybbp1a/Rpl27/Fau/Eif5/C1qbp/Noc2l/Ddx17/Bop1/Exosc10/Rrp1b/Wbp11/Nol9/Nat10/Ipo9/Dis3/Eif2a/Usp36/Nol6/Dhx30/Ddx54/Rrs1/Traf7/Rrn3/Pelp1/Rrp7a/Wdr46/Bysl/Suv39h1/Pak1ip1/Dhx37/Drosha/Wdr55/Riok1/Ngdn/Dhx29/Pten/Noa1/Pop4/Frg1/Eri3/Tsr3/Mettl5/Gtf3a/Rpusd1/Fdxacb1/Rpl24	49
BP	GO:0001841	neural tube formation	27/2090	132/28891	7.42475e-07	2.53614e-05	1.86613e-05	Brd2/Mthfd1/Mthfd1l/Arid1a/Vasp/Tgfb1/Gatad2a/Scrib/Med12/Kdm2b/Ski/Kat2a/Abl1/Mib1/Tsc2/Prkaca/Specc1l/Ipmk/Celsr1/Sufu/Ift52/Arhgap35/Luzp1/Mks1/Rab23/Rarg/Vangl2	27
BP	GO:0006399	tRNA metabolic process	33/2090	181/28891	7.58792e-07	2.5768e-05	1.89605e-05	Akt1/Exosc10/Farsb/Nat10/Trnt1/Rtraf/Thumpd1/Pnpt1/Grsf1/Lrrc47/Polr2f/Tarbp1/Pop4/Ctu2/Wdr6/Mars2/Zcchc7/Cars2/Dalrd3/Hars2/Sars2/Aars2/Dus2/Trit1/Gatb/Tsen34/Elp6/Elp4/Rpp25l/Wars2/Ctu1/Trmt10b/Dtwd2	33
BP	GO:0050779	RNA destabilization	23/2090	102/28891	8.09498e-07	2.73311e-05	2.01106e-05	Pabpc1/Khsrp/Eif4enif1/Ago2/Upf1/Zc3h12d/Zc3h18/Fxr1/Pum1/Pnpt1/Polr2g/Cnot3/Tnfrsf1b/Patl1/Dcp1a/Tut7/Fto/Mlh1/Dcps/Rc3h2/Mettl3/Lsm1/Zc3h12a	23
BP	GO:0000184	nuclear-transcribed mRNA catabolic process, nonsense-mediated decay	15/2090	48/28891	8.20701e-07	2.75501e-05	2.02718e-05	Pabpc1/Hnrnpab/Rnps1/Eif4a3/Exosc10/Upf1/Rbm8a/Casc3/Dcp1a/Pnrc2/Pym1/Smg6/Dhx34/Zc3h12a/Ctif	15
BP	GO:0060261	positive regulation of transcription initiation by RNA polymerase II	18/2090	67/28891	8.31279e-07	2.77457e-05	2.04157e-05	Sub1/Cand1/Paxip1/Med12/Med1/Srf/Med24/Med15/Med25/Gtf2a1/Taf4/Med16/Taf3/Znhit1/Med20/Med26/Xpa/Wnt10b	18
BP	GO:0045445	myoblast differentiation	26/2090	125/28891	8.44436e-07	2.80247e-05	2.0621e-05	Btg1/Ddx17/Smarcc1/Smarca4/Arid1a/Notch1/Tgfb1/Pbrm1/Smarcc2/Phf10/Mapk14/Srf/Actl6a/Sra1/Arid1b/Rb1/Smarcd1/Kat5/Nr2c2/Hinfp/Mbnl3/Cdon/Smarca2/Wnt10b/Smyd1/Sdc1	26
BP	GO:0007091	metaphase/anaphase transition of mitotic cell cycle	22/2090	95/28891	8.61421e-07	2.84269e-05	2.09169e-05	Tpr/Rad21/Smarcc1/Smarca4/Arid1a/Cul3/Pbrm1/Ik/Zwint/Smarcc2/Phf10/Actl6a/Dpf2/Arid1b/Apc/Rb1/Smarcd1/Haspin/Bcl7a/Smarca2/Nsmce2/Xrcc3	22
BP	GO:0099003	vesicle-mediated transport in synapse	43/2090	270/28891	8.70879e-07	2.85775e-05	2.10278e-05	Arhgdia/Canx/Rap1b/Atp2a2/Ctbp1/Ctnnb1/Bcl2l1/Ap2b1/Diaph1/Scrib/Fmr1/Rab8a/Git1/Vac14/Ap2a1/Git2/Atp6v1b2/Atp6v1f/Atp6v1h/Pip5k1c/Pten/Prkaca/Atp6v1e1/Atp6v1d/Sh3glb2/Stxbp5/Synj1/Rnf216/Btbd9/Vamp4/Snap47/Dennd1a/Pacsin1/Vps18/Fcho2/Necap1/Dgkq/Slc4a8/Grik5/Arc/Sh3gl3/Slc18a2/Pfn2	43
BP	GO:0045930	negative regulation of mitotic cell cycle	40/2090	243/28891	8.76518e-07	2.86019e-05	2.10457e-05	Tpr/Rad21/Ccng1/Btg1/Ctnnb1/Dgkz/Trrap/Zc3h12d/Rbm38/Ik/Zwint/Scrib/Clspn/Mdm2/Rbl1/Cdkn1a/Angel2/Abl1/Cdc73/Mtbp/Rbbp8/Dlg1/Uimc1/Pten/Apc/Rb1/Rad9a/Zfp655/Haspin/Rbl2/Zfyve19/Fbxo31/Xrcc3/Abraxas1/Fbxo7/Mbd4/Xpc/E2f7/Rpl24/Setmar	40
BP	GO:0046785	microtubule polymerization	21/2090	88/28891	8.96471e-07	2.90068e-05	2.13436e-05	Fkbp4/Numa1/Csnk1d/Clasp1/Git1/Clip1/Nin/Dctn1/Tbcd/Abl1/Apc/Tubgcp6/Mzt1/Hdgfl3/Golga2/Psrc1/Camsap1/Slain1/Gba2/Eml2/Fes	21
BP	GO:0045732	positive regulation of protein catabolic process	36/2090	208/28891	8.98858e-07	2.90068e-05	2.13436e-05	Msn/Ndfip1/Ezr/Bag6/Akt1/Rab7/Ubqln1/Cblb/Eif2a/Csnk1d/Usp5/Fmr1/Abca2/Rbx1/Snx1/Bcap31/Mdm2/Rnf40/Axin1/Gsk3a/Herpud1/Tnfrsf1b/Gabarap/Nsf/Sec22b/Apc/Ubr3/Gga1/Rnf14/Ubqln2/Rchy1/Csnk1e/Rnf41/Sgsm3/Plk2/Rnf144a	36
BP	GO:0045814	negative regulation of gene expression, epigenetic	25/2090	118/28891	9.5099e-07	3.05205e-05	2.24574e-05	Dnmt1/Trim28/Tpr/Suz12/Lmnb1/Smarca4/Mta1/Trim27/Suv39h1/Phf2/Ctr9/Gsk3a/Ehmt1/Atf7ip/Lmnb2/Jarid2/Rb1/Bahd1/Phf8/Bend3/Epc1/Phf19/Hdac6/H1f0/Bcl6	25
BP	GO:0043547	positive regulation of GTPase activity	41/2090	253/28891	9.77864e-07	3.12115e-05	2.29659e-05	Rcc2/Eif5/Rangap1/Rapgef1/Zc3h15/Coro1c/Myo9b/Dock8/Ptk2b/Scrib/Sipa1/Vav1/Rhog/Crkl/Ralgapb/Rasa1/Crk/Agap3/Tbc1d13/Tsc2/Gnas/Tbc1d9b/Tbc1d5/Asap1/Arhgap27/Tiam1/Tbc1d2b/Arhgap35/Bcr/Sipa1l3/Dennd1a/Sgsm3/Tbc1d30/Tbc1d8b/Rab11fip2/Plekhg4/Rapgef5/Sipa1l2/Mex3b/Tbc1d16/Arhgap29	41
BP	GO:0045787	positive regulation of cell cycle	53/2090	365/28891	9.84261e-07	3.12449e-05	2.29905e-05	Eif4g1/Rcc2/Sfpq/Phb2/Tpr/Lmnb1/Rad21/Wnk1/Nr4a3/Dync1h1/Ankrd17/Akt1/Numa1/Eif4g3/Brd4/Tgfb1/Cul3/Usp19/Med1/Cdc25a/Mdm2/Wiz/Eif4ebp1/Plscr1/Ino80/Abl1/Cdc73/Cdc7/Mepce/Lfng/Mtbp/Hsf1/Crebbp/Rptor/Brca2/Bcl2l11/Pkd1/E2f8/Rb1/Psrc1/Kat5/Gipc1/Nsmce2/Xrcc3/Lsm11/E2f7/Fen1/Ttl/Wnt10b/Nudt16/Dyrk3/Rad51c/Map10	53
BP	GO:0031023	microtubule organizing center organization	29/2090	150/28891	1.00643e-06	3.17759e-05	2.33811e-05	Ctnnb1/Pdcd6ip/Nat10/Ccnl1/Ppp1r12a/Clasp1/Rbm14/Nin/Dctn1/Kat2a/Cep250/Kifc1/Brca2/Nubp1/Fbxw5/Golga2/Chmp5/Cep76/Cep63/Poc1b/Xrcc3/Cep44/Alms1/Plk2/Cetn4/Cntln/Pard6g/Cep131/Fes	29
BP	GO:0031109	microtubule polymerization or depolymerization	27/2090	134/28891	1.01286e-06	3.18071e-05	2.34041e-05	Fkbp4/Arhgef1/Numa1/Htt/Csnk1d/Clasp1/Git1/Clip1/Nin/Dctn1/Tbcd/Abl1/Map1s/Apc/Tubgcp6/Specc1l/Mzt1/Hdgfl3/Golga2/Psrc1/Camsap1/Slain1/Gba2/Eml2/Hdac6/Wdr47/Fes	27
BP	GO:1901652	response to peptide	63/2090	464/28891	1.06472e-06	3.31149e-05	2.43664e-05	Cad/Prkar1a/Atp2a2/Rangap1/Ide/Mapk1/Parp1/Csk/Ogt/Nr4a3/Smarcc1/Eif4ebp2/Ctnnb1/Akt1/Stat6/Rab10/Notch1/Ahcyl1/Hadha/Erbin/Eif2b5/Rab8a/Ikbkb/Ptpn2/Mapk14/Mdm2/Scap/Eif4ebp1/Pip4k2b/Zfp592/Leprotl1/Gsk3a/Myo5a/Capn1/Mfn2/Hsf1/Crk/Tsc2/Pten/Apc/Tyk2/Gnas/Prkaca/Rb1/Kbtbd2/Zdhhc7/Chmp5/Prkci/Ankrd26/Ncoa1/Stxbp3/Nr4a2/Tgfbr3/Leprot/Trim41/Gpam/Sik2/Cry2/Slc2a8/Rbm4/Fut7/Serpinf1/Ager	63
BP	GO:0006650	glycerophospholipid metabolic process	43/2090	272/28891	1.06585e-06	3.31149e-05	2.43664e-05	Phb2/Dgkz/Hadha/Dgkd/Pi4ka/Fabp5/Pigt/Pigq/Vac14/Plscr1/Pip4k2b/Gpaa1/Dbi/Pip5k1c/Pigs/Ttc7/Pten/Mtmr2/Tamm41/Synj1/Mtmr9/Pign/Ttc7b/Abhd12/Hdhd5/Pik3c2a/Pitpnc1/Dhrs7b/Acp6/Mfsd2a/Pcyt1a/Inpp4a/Dgke/Ptdss2/Inpp5e/Gpam/Pip4p2/Dgkq/Pigl/Pigyl/Sla2/Pgap3/Lcat	43
BP	GO:0000209	protein polyubiquitination	41/2090	254/28891	1.08578e-06	3.35559e-05	2.46909e-05	Huwe1/Ctnnb1/Cbfb/Rnf187/Cul3/Trim27/Jade2/Zfp598/Wsb1/Rbx1/Ube2j1/Ube2j2/Rnf40/Znrf2/Ube2k/Axin1/Ube3b/Arel1/Dcaf15/Gabarap/Ube2o/Ambra1/Rnf14/Wwp2/Irf2bp1/Rnf168/Rc3h2/Bfar/Ube2a/Rnf216/Cep63/Wsb2/Rnf41/Ercc8/Hdac6/Ube2t/Ube2w/Btrc/Trim65/Rnf144a/Rnf8	41
BP	GO:0043434	response to peptide hormone	56/2090	396/28891	1.15778e-06	3.55533e-05	2.61606e-05	Cad/Prkar1a/Atp2a2/Rangap1/Ide/Mapk1/Parp1/Csk/Ogt/Nr4a3/Smarcc1/Eif4ebp2/Ctnnb1/Akt1/Stat6/Rab10/Ahcyl1/Hadha/Eif2b5/Rab8a/Ikbkb/Ptpn2/Mapk14/Scap/Eif4ebp1/Pip4k2b/Zfp592/Leprotl1/Gsk3a/Myo5a/Capn1/Mfn2/Hsf1/Crk/Tsc2/Pten/Apc/Tyk2/Gnas/Prkaca/Rb1/Kbtbd2/Zdhhc7/Prkci/Ankrd26/Ncoa1/Stxbp3/Nr4a2/Tgfbr3/Leprot/Gpam/Sik2/Cry2/Slc2a8/Rbm4/Fut7	56
BP	GO:0035967	cellular response to topologically incorrect protein	23/2090	104/28891	1.16259e-06	3.55533e-05	2.61606e-05	Atf4/Bag6/Cul3/Eif2a/Dnajc3/Ptpn2/Aup1/Herpud1/Os9/Atf6b/Hsf1/Derl2/Atf6/Selenos/Bfar/Ermp1/Dnajb12/Hdac6/Ube2w/Creb3/Erlec1/Parp6/Stc2	23
BP	GO:0007098	centrosome cycle	27/2090	135/28891	1.17969e-06	3.58883e-05	2.64071e-05	Ctnnb1/Pdcd6ip/Nat10/Ccnl1/Ppp1r12a/Nin/Dctn1/Kat2a/Cep250/Kifc1/Brca2/Nubp1/Fbxw5/Golga2/Chmp5/Cep76/Cep63/Poc1b/Xrcc3/Cep44/Alms1/Plk2/Cetn4/Cntln/Pard6g/Cep131/Fes	27
BP	GO:0010508	positive regulation of autophagy	30/2090	160/28891	1.29458e-06	3.91796e-05	2.8829e-05	Larp1/Htt/Supt5/Pip4k2b/Trim8/Gsk3a/Trp53inp1/Tsc2/Foxo3/Ambra1/Atf6/Bcl2l11/Vps13d/Sptlc2/Kat5/Flcn/Atg2a/Pik3c2a/Clec16a/Tpcn1/Fbxo7/Zc3h12a/Gpsm1/Plk2/Ticam1/Fyco1/Usp20/Trim65/Wdr45/Ager	30
BP	GO:0006475	internal protein amino acid acetylation	18/2090	69/28891	1.33064e-06	3.98579e-05	2.93281e-05	Mybbp1a/Noc2l/Baz1b/Smarca4/Bag6/Tgfb1/Msl2/Kat6a/Actl6a/Kat2a/Kansl3/Crebbp/Nfyc/Kat14/Por/Kat5/Kat8/Hdac8	18
BP	GO:0018393	internal peptidyl-lysine acetylation	18/2090	69/28891	1.33064e-06	3.98579e-05	2.93281e-05	Mybbp1a/Noc2l/Baz1b/Smarca4/Bag6/Tgfb1/Msl2/Kat6a/Actl6a/Kat2a/Kansl3/Crebbp/Nfyc/Kat14/Por/Kat5/Kat8/Hdac8	18
BP	GO:0018394	peptidyl-lysine acetylation	20/2090	83/28891	1.37508e-06	4.08864e-05	3.00848e-05	Mybbp1a/Noc2l/Baz1b/Smarca4/Bag6/Tgfb1/Msl2/Kat6a/Actl6a/Kat2a/Kansl3/Crebbp/Dip2b/Nfyc/Kat14/Por/Kat5/Kat8/Hdac8/Hint2	20
BP	GO:0019080	viral gene expression	19/2090	76/28891	1.37898e-06	4.08864e-05	3.00848e-05	Ptbp1/Eif3b/Pcbp2/Eif3f/Psmc3/Smarca4/Eif3g/Notch1/Brd4/Rrp1b/Trim27/Trim8/Hexim1/Ccnt2/Snw1/Zfp639/Rsf1/Ctdp1/Mon1b	19
BP	GO:0031123	RNA 3'-end processing	22/2090	98/28891	1.50976e-06	4.4314e-05	3.26069e-05	Papola/Sympk/Slbp/Exosc10/Ahcyl1/Cpsf1/Ints7/Nudt21/Ints1/Trnt1/Wdr33/Fip1l1/Pnpt1/Cdc73/Rprd1b/Tut7/Polr2d/Leo1/Eri3/Lsm11/Rprd1a/Zc3h3	22
BP	GO:0044784	metaphase/anaphase transition of cell cycle	22/2090	98/28891	1.50976e-06	4.4314e-05	3.26069e-05	Tpr/Rad21/Smarcc1/Smarca4/Arid1a/Cul3/Pbrm1/Ik/Zwint/Smarcc2/Phf10/Actl6a/Dpf2/Arid1b/Apc/Rb1/Smarcd1/Haspin/Bcl7a/Smarca2/Nsmce2/Xrcc3	22
BP	GO:0071478	cellular response to radiation	32/2090	178/28891	1.52422e-06	4.4515e-05	3.27548e-05	Noc2l/Parp1/Bcl2l1/Tgfb1/Ints7/Yy1/Cdc25a/Rbx1/Mapk14/Mdm2/Cdkn1a/Ino80/Ei24/Trp53inp1/Hsf1/Agap3/Tlk2/Crebbp/Brca2/Rnf168/Rad9a/Mettl3/Polk/Ercc4/Usp28/Mapk11/Bbc3/Xpc/Xpa/Lig4/Trpm1/Opn3	32
BP	GO:0006469	negative regulation of protein kinase activity	35/2090	204/28891	1.56048e-06	4.53402e-05	3.3362e-05	Prkar1a/Dnaja1/Akt1/Coro1c/Cblb/Trim27/Hipk3/Rtraf/Dnajc3/Heg1/Ggnbp2/Mllt1/Ptpn2/Cdkn1a/Prkar2a/Fem1a/Hexim1/Abl1/Pkn1/Tsc2/Pten/Apc/Spry1/Rb1/Dusp7/Akt1s1/Chmp6/Prkag2/Fbxo7/Cdkn2c/Fam72a/Tesk1/Prkar2b/Spry2/Camk2n2	35
BP	GO:1903322	positive regulation of protein modification by small protein conjugation or removal	28/2090	145/28891	1.5737e-06	4.53402e-05	3.3362e-05	Huwe1/Ndfip1/Mycbp2/Ubqln1/Cblb/Mta1/Cul3/Paxip1/Traf7/Rbx1/Xiap/Hdac3/Rnf40/Pdcd6/Axin1/Gsk3a/Gabarap/Pten/Aimp2/Fanci/Rchy1/Ndfip2/Arnt/Dcun1d2/Mastl/Btrc/Zc3h12a/Ticam1	28
BP	GO:0006260	DNA replication	43/2090	276/28891	1.58353e-06	4.53402e-05	3.3362e-05	Mcm2/Parp1/Ankrd17/Pole/Upf1/Yy1/Jade2/Rfc5/Pold2/Uchl5/Ehmt2/Cdc45/Carm1/Atf1/Chaf1a/Polg/Actl6a/Gmnn/Wiz/Ctc1/Mcrs1/Ino80/Cdc7/Usp37/Rbbp8/Brca2/Gins4/Chtf18/Slx4/E2f8/Pura/Smarcal1/Brpf3/Polk/Nfix/Repin1/Primpol/E2f7/Fen1/Nfic/Zfp365/Lig4/Setmar	43
BP	GO:0090068	positive regulation of cell cycle process	43/2090	276/28891	1.58353e-06	4.53402e-05	3.3362e-05	Eif4g1/Rcc2/Sfpq/Phb2/Tpr/Lmnb1/Rad21/Wnk1/Dync1h1/Ankrd17/Akt1/Numa1/Eif4g3/Brd4/Tgfb1/Cul3/Usp19/Med1/Cdc25a/Mdm2/Wiz/Plscr1/Ino80/Cdc73/Cdc7/Mepce/Mtbp/Crebbp/Rptor/E2f8/Rb1/Kat5/Gipc1/Nsmce2/Xrcc3/Lsm11/E2f7/Fen1/Wnt10b/Nudt16/Dyrk3/Rad51c/Map10	43
BP	GO:1990778	protein localization to cell periphery	56/2090	400/28891	1.59296e-06	4.53878e-05	3.3397e-05	Eif4g1/Flna/Rab8b/Wnk1/Csk/Ogt/Ezr/Atp1b3/Akt1/Bcl2l1/Numa1/Rab10/Rab7/Tgfb1/Scrib/Efr3a/Zdhhc3/Rab8a/Ikbkb/Abca2/Sec16a/Rhog/Git1/Clip1/Snx27/Ppp1r9b/Golga7/Myo5a/Nsf/Ttc7/Tsc2/Dlg1/Gga1/Nubp1/Pacs2/Kif1b/Zdhhc7/Prkci/Ttc7b/Vamp4/Tspan14/Zfyve27/Golph3l/Snap47/Neto2/Stx8/Pacsin1/Fcho2/Ehd3/Afdn/Rab11fip2/Bbs2/Itga3/Rab3d/Mex3b/Rilpl1	56
BP	GO:0000381	regulation of alternative mRNA splicing, via spliceosome	16/2090	57/28891	1.77679e-06	5.03797e-05	3.70702e-05	Ptbp1/Hnrnpl/Thrap3/Rbm25/Khdrbs1/Rnps1/Ddx17/Celf2/Puf60/Rbm8a/Fmr1/Fxr1/Rbm15/Rbm15b/Tia1/Rbm4	16
BP	GO:1905037	autophagosome organization	25/2090	122/28891	1.8184e-06	5.13104e-05	3.77549e-05	Atp2a2/Rab7/Ubqln1/Ehmt2/Pip4k2b/Wipi2/Ubxn2a/Gabarap/Trp53inp1/Mfn2/Sec22b/Ambra1/Tcirg1/Pacs2/Ubqln2/Atg2a/Pik3c2a/Atp13a2/Atg9b/Rab23/Wdr45/Trp53inp2/Rab19/Rab43/Efnb1	25
BP	GO:0030100	regulation of endocytosis	50/2090	344/28891	1.91326e-06	5.37278e-05	3.95337e-05	Myh9/Actn4/Csk/Rapgef1/Bcl2l1/Ap2b1/Tgfb1/Ankrd13a/Dgkd/Scrib/Fmr1/Abca2/Vac14/Plscr1/Cd2ap/Ap2a1/Pros1/Pip5k1c/Mib1/Nsf/Tsc2/Pten/Mtmr2/Pacsin2/Tnk2/Ubqln2/Atxn2/Tbc1d5/Synj1/Rab5b/Rin3/Myo18a/Rnf216/Il15ra/Btbd9/Vamp4/Bcr/Wasl/Alms1/Pacsin1/Plk2/Smap1/Cbll1/Rufy1/Pip4p2/Dgkq/Mex3b/Arc/Sh3gl3/Ager	50
BP	GO:0045619	regulation of lymphocyte differentiation	37/2090	224/28891	2.03677e-06	5.69224e-05	4.18843e-05	Ndfip1/Smarcc1/Smarca4/Cbfb/Cd44/Arid1a/Tgfb1/Pbrm1/Smarcc2/Clptm1/Phf10/Ptpn2/Actl6a/Ctla4/Ap3b1/Kat2a/Drosha/Abl1/Arid1b/Ambra1/Sh2b3/Rhoh/Smarcd1/Rc3h2/Kat5/Card11/Mettl3/Il15ra/Smarca2/Rnf41/Fbxo7/Zc3h12a/Sox12/Klhl25/Wnt10b/Bcl6/Cd1d1	37
BP	GO:0016072	rRNA metabolic process	40/2090	252/28891	2.24712e-06	6.2502e-05	4.59899e-05	Rpl10a/Rps16/Rpl27/Tcof1/Ddx17/Smarca4/Bop1/Exosc10/Rrp1b/Wbp11/Nol9/Nat10/Dis3/Usp36/Nol6/Ddx54/Rrs1/Gtf3c1/Pelp1/Rrp7a/Wdr46/Bysl/Suv39h1/Dhx37/Drosha/Wdr55/Riok1/Ngdn/Xrn1/Spin1/Pop4/Zcchc7/Frg1/Eri3/Tsr3/Mettl5/Dis3l/Rpusd1/Fdxacb1/Pelo	40
BP	GO:0045580	regulation of T cell differentiation	33/2090	190/28891	2.32313e-06	6.43099e-05	4.73202e-05	Smarcc1/Smarca4/Cbfb/Cd44/Arid1a/Tgfb1/Pbrm1/Smarcc2/Clptm1/Phf10/Ptpn2/Actl6a/Ctla4/Ap3b1/Kat2a/Drosha/Abl1/Arid1b/Ambra1/Sh2b3/Rhoh/Smarcd1/Rc3h2/Kat5/Card11/Mettl3/Smarca2/Zc3h12a/Sox12/Klhl25/Wnt10b/Bcl6/Cd1d1	33
BP	GO:0051098	regulation of binding	56/2090	405/28891	2.35234e-06	6.48113e-05	4.76891e-05	Eif4g1/Trim28/Atp2a2/Ide/Hjurp/Parp1/Dot1l/Smarca4/Ctnnb1/Sympk/Akt1/Eif4a3/Brd4/Cblb/Tgfb1/Hipk3/Hipk1/Fmr1/Carm1/Zfpm1/Mark2/Ski/Plscr1/Cdkn1a/Abl1/Med25/Mepce/Lfng/Mark3/Mfn2/Hsf1/Crk/Rsf1/Smad2/Tfip11/Aplp2/Pkd1/Rb1/Golga2/Tiam1/Cdon/Dhrs7b/Gemin2/Hdac5/Ercc4/Tgfbr3/Fam220a/H1f0/Gpsm1/Plk2/Ticam1/Adam15/Wfikkn2/Ctnnbip1/Ager/Gata1	56
BP	GO:0045931	positive regulation of mitotic cell cycle	26/2090	132/28891	2.49167e-06	6.80559e-05	5.00765e-05	Eif4g1/Rcc2/Phb2/Lmnb1/Ankrd17/Akt1/Brd4/Tgfb1/Cul3/Cdc25a/Mdm2/Eif4ebp1/Abl1/Cdc7/Mepce/Mtbp/Hsf1/Crebbp/Rptor/Brca2/Rb1/Nsmce2/Lsm11/Ttl/Wnt10b/Rad51c	26
BP	GO:0045661	regulation of myoblast differentiation	20/2090	86/28891	2.4934e-06	6.80559e-05	5.00765e-05	Btg1/Smarcc1/Smarca4/Arid1a/Notch1/Tgfb1/Pbrm1/Smarcc2/Phf10/Mapk14/Actl6a/Sra1/Arid1b/Smarcd1/Kat5/Nr2c2/Mbnl3/Cdon/Smarca2/Smyd1	20
BP	GO:0032785	negative regulation of DNA-templated transcription, elongation	9/2090	19/28891	2.52833e-06	6.86884e-05	5.05419e-05	Parp1/Supt5/Axin1/Supt4a/Nelfa/Nelfcd/Rnf168/Eapp/Rnf8	9
BP	GO:0051090	regulation of DNA-binding transcription factor activity	59/2090	436/28891	2.57207e-06	6.95532e-05	5.11782e-05	Flna/Phb2/Mapk1/Tnfrsf4/Smarca4/Ctnnb1/Akt1/Pprc1/Mtpn/Psma6/Tgfb1/Jund/Trim27/Erbin/Rlim/Paxip1/Ikbkb/Irak1/Carm1/Kat6a/Srf/Hdac3/Ifrd1/Cactin/Trim8/Prkd2/Ikbke/Hsf1/Pten/Crebbp/Pkd1/Wwp2/Pura/Sufu/Card11/Prkci/Taf3/Thap11/Trappc9/Rnf41/Hdac5/Lrp5/Tgfbr3/Crtc3/Crtc1/Zc3h12a/Nfix/Commd6/Creb3/Ticam1/Rhebl1/Nfkbil1/Lpar5/Wnt10b/Il18r1/Ticam2/E130311K13Rik/Ctnnbip1/Ager	59
BP	GO:1903037	regulation of leukocyte cell-cell adhesion	56/2090	407/28891	2.74169e-06	7.37981e-05	5.43017e-05	Prkar1a/Wnk1/Ndfip1/Nr4a3/Smarcc1/Smarca4/Cbfb/Cd44/Akt1/Arid1a/Il12rb1/Cblb/Tgfb1/Zc3h12d/Dock8/Pbrm1/Scrib/Smarcc2/Phf10/Irak1/Ptpn2/Actl6a/Ctla4/Ap3b1/Abl1/Slamf1/Capn1/Arid1b/Tsc2/Mia3/Dlg1/Pten/Tyk2/Selenok/Ambra1/Rhoh/Smarcd1/Rc3h2/Kat5/Card11/Pag1/Smarca2/Dapl1/Tnfrsf14/Zc3h12a/Sox12/Fadd/Klhl25/Gpam/Tnfrsf21/Wnt10b/Bcl6/Fut7/Ager/Efnb1/Cd1d1	56
BP	GO:0007159	leukocyte cell-cell adhesion	60/2090	447/28891	2.76241e-06	7.40148e-05	5.44612e-05	Msn/Prkar1a/Wnk1/Ndfip1/Nr4a3/Smarcc1/Smarca4/Cbfb/Cd44/Akt1/Arid1a/Il12rb1/Cblb/Tgfb1/Zc3h12d/Dock8/Pbrm1/Scrib/Smarcc2/Phf10/Irak1/Ptpn2/Actl6a/Stk10/Ctla4/Ap3b1/Abl1/Slamf1/Itgb7/Capn1/Arid1b/Tsc2/Mia3/Dlg1/Pten/Tyk2/Selenok/Ambra1/Rhoh/Smarcd1/Rc3h2/Kat5/Card11/Pag1/Smarca2/Dapl1/Tnfrsf14/Zc3h12a/Sox12/Fadd/Klhl25/Slc39a8/Gpam/Tnfrsf21/Wnt10b/Bcl6/Fut7/Ager/Efnb1/Cd1d1	60
BP	GO:0045727	positive regulation of translation	27/2090	141/28891	2.83699e-06	7.5666e-05	5.56762e-05	Eif4g1/Ptbp1/Larp1/C1qbp/Mapk1/Khdrbs1/Abcf1/Ogt/Ago2/Eif4a3/Eif4g3/Uhmk1/Nat10/Ptk2b/Eif2b5/Dnajc3/Fmr1/Fxr1/Polr2g/Pcif1/Pym1/Mettl3/Impact/Rmnd1/Mettl5/Rbm4/Rpusd3	27
BP	GO:1903052	positive regulation of proteolysis involved in protein catabolic process	26/2090	133/28891	2.8862e-06	7.66286e-05	5.63845e-05	Bag6/Akt1/Ubqln1/Eif2a/Csnk1d/Ptk2b/Usp5/Traf7/Fmr1/Rbx1/Bcap31/Mdm2/Ctsc/Rnf40/Axin1/Gsk3a/Herpud1/Gabarap/Pten/Rnf14/Ubqln2/Rchy1/Agtpbp1/Csnk1e/Plk2/Rnf144a	26
BP	GO:0034244	negative regulation of transcription elongation by RNA polymerase II	8/2090	15/28891	3.00212e-06	7.93357e-05	5.83764e-05	Parp1/Axin1/Supt4a/Nelfa/Nelfcd/Rnf168/Eapp/Rnf8	8
BP	GO:0009411	response to UV	29/2090	158/28891	3.01533e-06	7.93357e-05	5.83764e-05	Noc2l/Parp1/Sdf4/Akt1/Msh6/Yy1/Cdc25a/Rbx1/Mapk14/Cdkn1a/Ino80/Ei24/Trp53inp1/Agap3/Crebbp/Brca2/Rnf168/Mettl3/Ube2a/Polk/Ercc8/Ercc4/Usp28/Fech/Mapk11/Xpc/Primpol/Xpa/Opn3	29
BP	GO:0051168	nuclear export	31/2090	175/28891	3.03908e-06	7.96021e-05	5.85724e-05	Ywhae/Tpr/Rangap1/Wnk1/Ube2i/Khdrbs1/Xpo6/Eif4a3/Nup188/Ahcyl1/Uhmk1/Tgfb1/Nup93/Pom121/Xpo7/Nol6/Rbm8a/Nup214/Fmr1/Nup133/Mdm2/Hdac3/Rbm15b/Casc3/Emd/Rbm22/Desi1/Prkaca/Pkd1/Phax/Zc3h11a	31
BP	GO:0045637	regulation of myeloid cell differentiation	38/2090	237/28891	3.1144e-06	8.12108e-05	5.97561e-05	Ndfip1/Ctnnb1/Tgfb1/Ptk2b/Med1/Hax1/Ptpn2/Mapk14/Zfpm1/Notch2/Rbm15/Ctr9/Cdc73/Hsf1/Rcor1/Apc/Rptor/Foxo3/Pithd1/Gnas/Rb1/Setd1a/Leo1/Tmem64/Tfe3/Rnf41/Myb/Smap1/Fadd/Csf1/Gpr137/Rarg/Gpr55/Acvr2a/P4htm/Ctnnbip1/Gata1/Fes	38
BP	GO:0010507	negative regulation of autophagy	19/2090	80/28891	3.16164e-06	8.1947e-05	6.02978e-05	Eif4g1/Wnk1/Akt1/Trim27/Foxk2/Usp36/Ehmt2/Ubqln4/Foxk1/Sec22b/Tsc2/Rptor/Wdr6/Golga2/Mtmr9/Rnf41/Clec16a/Dapl1/Qsox1	19
BP	GO:0001558	regulation of cell growth	61/2090	459/28891	3.17069e-06	8.1947e-05	6.02978e-05	Eif4g1/Smarca4/Cd44/Akt1/Dbnl/Mtpn/Sbf1/Tgfb1/Zc3h12d/Yy1/Ptk2b/Kdm2b/Srf/Uri1/Ifrd1/Gdi1/Crkl/Foxk1/Extl3/Cdkn1a/Ppp1r9b/Ino80/Abl1/Gsk3a/Cdc73/Ei24/Zfp639/Crk/Spag9/Pten/Dip2b/Rptor/Ctdp1/Zmat3/Derl2/Nr3c1/Nubp1/Eno1b/Rb1/Slc23a2/Psrc1/Dnph1/Zfyve27/Smarca2/Limk1/Mfsd2a/Bbc3/N6amt1/Cdkn2c/Creb3/St7l/Ttl/Adam15/Taf9b/Afdn/Prdm11/P3h1/Bcl6/Sertad3/Cttn/Eaf2	61
BP	GO:0006644	phospholipid metabolic process	51/2090	360/28891	3.23758e-06	8.31431e-05	6.11779e-05	Phb2/Isyna1/Dgkz/Hadha/Idi1/Dgkd/Pi4ka/Fabp5/Abca2/Pigt/Pigq/Vac14/Plscr1/Pip4k2b/Gpaa1/Sgpp1/Dbi/Pip5k1c/Pigs/Ttc7/Pten/Mtmr2/Lyst/Dhdds/Plbd2/Sptlc2/Tamm41/Synj1/Mtmr9/Pign/Ttc7b/Abhd12/Hdhd5/Pik3c2a/Pitpnc1/Dhrs7b/Acp6/Mfsd2a/Pcyt1a/Inpp4a/Dgke/Ptdss2/Inpp5e/Gpam/Pip4p2/Dgkq/Pigl/Pigyl/Sla2/Pgap3/Lcat	51
BP	GO:0016311	dephosphorylation	48/2090	331/28891	3.24544e-06	8.31431e-05	6.11779e-05	Ptbp1/Ywhae/Hsp90b1/Ppp1ca/Ppm1g/Calm3/Ptp4a3/Htt/Ptpa/Tgfb1/Cdc25a/Ppp1r12a/Ikbkb/Psph/Ptpn2/Uri1/Dusp5/Ppp2r5d/Ssh2/Mprip/Arpp19/Ppp1r9b/Sgpp1/Pten/Mtmr2/Ctdp1/Ambra1/Sdhaf2/Akap1/Ptpn4/Synj1/Dusp7/Mtmr9/Cnep1r1/Mgat5/Mastl/Acp6/Fam220a/Btrc/Fra10ac1/Inpp5e/Pip4p2/Cry2/Pxylp1/Ppm1l/Dusp14/Cdkn3/Ptpdc1	48
BP	GO:0031124	mRNA 3'-end processing	15/2090	53/28891	3.32292e-06	8.42481e-05	6.1991e-05	Papola/Sympk/Slbp/Ahcyl1/Cpsf1/Nudt21/Wdr33/Fip1l1/Cdc73/Rprd1b/Polr2d/Leo1/Lsm11/Rprd1a/Zc3h3	15
BP	GO:0016241	regulation of macroautophagy	24/2090	118/28891	3.33185e-06	8.42481e-05	6.1991e-05	Larp1/Ubqln1/Htt/Supt5/Usp36/Ehmt2/Ubqln4/Pip4k2b/Sec22b/Tsc2/Ambra1/Vps13d/Ubqln2/Sptlc2/Atg2a/Atp13a2/Tecpr1/Rnf41/Hdac6/Clec16a/Gpsm1/Qsox1/Fyco1/Wdr45	24
BP	GO:0031398	positive regulation of protein ubiquitination	24/2090	118/28891	3.33185e-06	8.42481e-05	6.1991e-05	Huwe1/Ndfip1/Mycbp2/Ubqln1/Cblb/Mta1/Cul3/Paxip1/Rbx1/Xiap/Hdac3/Rnf40/Pdcd6/Axin1/Gsk3a/Gabarap/Pten/Aimp2/Fanci/Rchy1/Ndfip2/Mastl/Btrc/Ticam1	24
BP	GO:0000280	nuclear division	60/2090	450/28891	3.4259e-06	8.62529e-05	6.34662e-05	Actr2/Flna/Phb2/Baz1b/Tpr/Rad21/Nudc/Bag6/Numa1/Eif4g3/Tgfb1/Cul3/Ik/Zwint/Ehmt2/Rrs1/Stag1/Clasp1/Ino80/Mtbp/Hsf1/Spin1/Kifc1/Pten/Apc/Reep3/Kif2a/Ctdp1/Brca2/Bcl2l11/Chtf18/Mlh1/Slx4/Brip1/Mzt1/Rb1/Fbxw5/Golga2/Psrc1/Kat5/Chmp5/Syce2/Cep63/Rad51d/Haspin/Chmp6/Mastl/Ercc4/Nsmce2/Xrcc3/Abraxas1/Spire1/Nfix/Foxj2/Mybl1/Rad51c/Rpl24/Msh5/Mei4/Map10	60
BP	GO:0042158	lipoprotein biosynthetic process	22/2090	103/28891	3.63231e-06	9.10572e-05	6.70013e-05	Nmt1/Zdhhc3/Pigt/Pigq/Zdhhc6/Golga7/Gpaa1/Wipi2/Dbi/Pigs/Selenok/Zdhhc8/Zdhhc7/Pign/Zdhhc16/Pigl/Zdhhc24/Pigyl/Zdhhc1/Wdr45/Pgap3/Lcat	22
BP	GO:0046474	glycerophospholipid biosynthetic process	30/2090	168/28891	3.67922e-06	9.18389e-05	6.75764e-05	Dgkz/Dgkd/Pi4ka/Fabp5/Pigt/Pigq/Vac14/Plscr1/Pip4k2b/Gpaa1/Pip5k1c/Pigs/Ttc7/Tamm41/Pign/Ttc7b/Hdhd5/Pik3c2a/Dhrs7b/Pcyt1a/Inpp4a/Dgke/Ptdss2/Gpam/Dgkq/Pigl/Pigyl/Sla2/Pgap3/Lcat	30
BP	GO:0007051	spindle organization	33/2090	194/28891	3.71076e-06	9.2232e-05	6.78657e-05	Myh9/Flna/Tpr/Nudc/Ezr/Dync1h1/Numa1/Ptpa/Csnk1d/Stag1/Pcnt/Clasp1/Hdac3/Dctn1/Ino80/Map1s/Kifc1/Dlg1/Pten/Kif2a/Mlh1/Tubgcp6/Pkd1/Mzt1/Golga2/Psrc1/Chmp5/Chmp6/Abraxas1/Aunip/Plk2/Ccdc69/Map10	33
BP	GO:0031669	cellular response to nutrient levels	38/2090	239/28891	3.82199e-06	9.45942e-05	6.96038e-05	Eif4g1/Mybbp1a/Atf4/Mapk1/Ogt/Sec13/Ehmt2/Med1/Stk24/Srf/Ireb2/Suv39h1/Cdkn1a/Rheb/Snw1/Wipi2/Gabarap/Tsc2/Crebbp/Rptor/Kat5/Flcn/Xpr1/Pik3c2a/Ncoa1/Clec16a/Impact/Mfsd2a/Dapl1/Zc3h12a/Prkag1/Sik2/Prkab2/Wdr45/Gpr155/Otud3/Cd68/Fes	38
BP	GO:0035966	response to topologically incorrect protein	26/2090	135/28891	3.85182e-06	9.49304e-05	6.98512e-05	Atf4/Bag6/Cul3/Eif2a/Dnajc3/Ptpn2/Ube2j2/Aup1/Herpud1/Os9/Atf6b/Mfn2/Hsf1/Derl2/Atf6/Selenos/Bfar/Ermp1/Dnajb12/Hdac6/Ube2w/Creb3/Erlec1/Parp6/Chac1/Stc2	26
BP	GO:0014020	primary neural tube formation	24/2090	119/28891	3.89014e-06	9.53752e-05	7.01785e-05	Brd2/Mthfd1/Mthfd1l/Arid1a/Vasp/Tgfb1/Gatad2a/Scrib/Med12/Kdm2b/Ski/Kat2a/Abl1/Tsc2/Prkaca/Specc1l/Celsr1/Sufu/Arhgap35/Luzp1/Mks1/Rab23/Rarg/Vangl2	24
BP	GO:0070646	protein modification by small protein removal	25/2090	127/28891	3.90253e-06	9.53752e-05	7.01785e-05	Shmt2/Eif3f/Usp24/Usp15/Usp36/Usp19/Uchl5/Gps1/Usp5/Cops7a/Usp10/Ubxn1/Atxn7l3/Uspl1/Usp37/Desi1/Usp31/Usp12/Usp21/Usp28/Abraxas1/Zc3h12a/Usp20/Otud3/Uchl4	25
BP	GO:2000144	positive regulation of DNA-templated transcription initiation	18/2090	74/28891	3.96249e-06	9.64372e-05	7.09599e-05	Sub1/Cand1/Paxip1/Med12/Med1/Srf/Med24/Med15/Med25/Gtf2a1/Taf4/Med16/Taf3/Znhit1/Med20/Med26/Xpa/Wnt10b	18
BP	GO:0034644	cellular response to UV	21/2090	96/28891	4.02326e-06	9.75097e-05	7.17491e-05	Noc2l/Parp1/Yy1/Cdc25a/Rbx1/Mapk14/Cdkn1a/Ino80/Ei24/Trp53inp1/Agap3/Crebbp/Rnf168/Mettl3/Polk/Ercc4/Usp28/Mapk11/Xpc/Xpa/Opn3	21
BP	GO:0071375	cellular response to peptide hormone stimulus	44/2090	296/28891	4.27975e-06	0.000103298	7.60079e-05	Prkar1a/Rangap1/Ide/Mapk1/Parp1/Csk/Ogt/Nr4a3/Smarcc1/Eif4ebp2/Ctnnb1/Akt1/Stat6/Rab10/Ahcyl1/Rab8a/Ptpn2/Eif4ebp1/Pip4k2b/Zfp592/Leprotl1/Gsk3a/Myo5a/Mfn2/Hsf1/Crk/Tsc2/Pten/Apc/Tyk2/Gnas/Prkaca/Rb1/Zdhhc7/Prkci/Ankrd26/Ncoa1/Nr4a2/Leprot/Gpam/Sik2/Slc2a8/Rbm4/Fut7	44
BP	GO:0001843	neural tube closure	23/2090	112/28891	4.46162e-06	0.000107244	7.89119e-05	Brd2/Mthfd1/Mthfd1l/Arid1a/Vasp/Tgfb1/Gatad2a/Scrib/Med12/Kdm2b/Ski/Kat2a/Abl1/Tsc2/Prkaca/Specc1l/Celsr1/Sufu/Arhgap35/Mks1/Rab23/Rarg/Vangl2	23
BP	GO:0019318	hexose metabolic process	40/2090	259/28891	4.48246e-06	0.000107304	7.89555e-05	Atf4/Mdh2/Ogt/Akt1/Foxk2/Got1/Fabp5/Ptpn2/Mapk14/Dlat/Kat2a/Foxk1/Arpp19/Adpgk/Gpd2/Man2a1/Man2c1/Bckdk/Prkaca/Hectd4/Nr3c1/Eno1b/Kbtbd2/Glb1/Acadm/Galk2/Man2b2/Pmm1/Gpt2/Pgm2l1/Pofut2/Oma1/Lipa/Ppp1r3e/Dgkq/B3glct/Cox11/Slc2a8/Gpt/Sord	40
BP	GO:0071496	cellular response to external stimulus	48/2090	335/28891	4.54013e-06	0.000107844	7.93532e-05	Eif4g1/Mybbp1a/Arhgdia/Atp1a1/Atf4/Mapk1/Ogt/Ctnnb1/Akt1/Got1/Sec13/Ehmt2/Sipa1/Piezo1/Med1/Stk24/Srf/Ireb2/Suv39h1/Cdkn1a/Rheb/Snw1/Wipi2/Gabarap/Tsc2/Crebbp/Rptor/Ptger4/Kat5/Flcn/Xpr1/Pik3c2a/Arhgap35/Ncoa1/Clec16a/Impact/Nr4a2/Mfsd2a/Dapl1/Zc3h12a/Prkag1/Sik2/Prkab2/Wdr45/Gpr155/Otud3/Cd68/Fes	48
BP	GO:0042770	signal transduction in response to DNA damage	32/2090	187/28891	4.54197e-06	0.000107844	7.93532e-05	Ccng1/Dot1l/Cd44/Dgkz/Brd4/Ints7/Rbm38/Paxip1/Usp10/Clspn/Mapk14/Mdm2/Cdkn1a/Abl1/Uimc1/Foxo3/Brca2/Smyd2/Kat5/Rad9a/Nek1/Znhit1/Hinfp/Fbxo31/Usp28/Abraxas1/Mbd4/Xpc/Pcbp4/E2f7/Dyrk3/Rnf8	32
BP	GO:0061157	mRNA destabilization	21/2090	97/28891	4.7879e-06	0.000112314	8.26422e-05	Pabpc1/Khsrp/Eif4enif1/Ago2/Upf1/Zc3h12d/Fxr1/Pum1/Pnpt1/Polr2g/Cnot3/Patl1/Dcp1a/Tut7/Fto/Mlh1/Dcps/Rc3h2/Mettl3/Lsm1/Zc3h12a	21
BP	GO:0061912	selective autophagy	21/2090	97/28891	4.7879e-06	0.000112314	8.26422e-05	Huwe1/Phb2/Ogt/Rab7/Ubqln1/Htt/Tgfb1/Aup1/Wipi2/Mfn2/Ambra1/Ufm1/Vps13d/Gaa/Sptlc2/Uba5/Atg2a/Tex264/Rnf41/Hdac6/Clec16a	21
BP	GO:1901992	positive regulation of mitotic cell cycle phase transition	21/2090	97/28891	4.7879e-06	0.000112314	8.26422e-05	Eif4g1/Rcc2/Phb2/Lmnb1/Ankrd17/Akt1/Brd4/Tgfb1/Cul3/Cdc25a/Mdm2/Cdc7/Mepce/Mtbp/Crebbp/Rptor/Rb1/Nsmce2/Lsm11/Wnt10b/Rad51c	21
BP	GO:2000134	negative regulation of G1/S transition of mitotic cell cycle	17/2090	68/28891	4.89452e-06	0.000114145	8.39893e-05	Dgkz/Zc3h12d/Rbm38/Mdm2/Rbl1/Cdkn1a/Cdc73/Dlg1/Pten/Apc/Rb1/Zfp655/Haspin/Rbl2/Fbxo31/Fbxo7/E2f7	17
BP	GO:0050657	nucleic acid transport	27/2090	145/28891	4.92457e-06	0.000114145	8.39893e-05	Nup210/Tpr/Khsrp/Wnk1/Khdrbs1/Eif4a3/Slbp/Nup188/Htt/Nup93/Pom121/Nol6/Rbm8a/Sec13/Nup214/Sidt2/Fmr1/Nup133/Pnpt1/Rbm15b/Casc3/Hsf1/Phax/Zc3h11a/Zc3h3/Arc/Tst	27
BP	GO:0050658	RNA transport	27/2090	145/28891	4.92457e-06	0.000114145	8.39893e-05	Nup210/Tpr/Khsrp/Wnk1/Khdrbs1/Eif4a3/Slbp/Nup188/Htt/Nup93/Pom121/Nol6/Rbm8a/Sec13/Nup214/Sidt2/Fmr1/Nup133/Pnpt1/Rbm15b/Casc3/Hsf1/Phax/Zc3h11a/Zc3h3/Arc/Tst	27
BP	GO:0007030	Golgi organization	26/2090	137/28891	5.10483e-06	0.000117855	8.67194e-05	Huwe1/Mapk1/Htt/Tmed5/Csnk1d/Map2k2/Rab8a/Vrk1/Sec16a/Clasp1/Rab2a/Ubxn2a/Gbf1/Sec22b/Golga2/Hikeshi/Cog8/Tjap1/Myo18a/Cog1/Vamp4/Golph3l/Cog7/Bet1/Ehd3/Rab43	26
BP	GO:0060606	tube closure	23/2090	113/28891	5.22204e-06	0.000120086	8.83614e-05	Brd2/Mthfd1/Mthfd1l/Arid1a/Vasp/Tgfb1/Gatad2a/Scrib/Med12/Kdm2b/Ski/Kat2a/Abl1/Tsc2/Prkaca/Specc1l/Celsr1/Sufu/Arhgap35/Mks1/Rab23/Rarg/Vangl2	23
BP	GO:0090150	establishment of protein localization to membrane	41/2090	270/28891	5.25702e-06	0.000120417	8.86043e-05	Rab8b/Wnk1/Csk/Ogt/Bag6/Rab10/Rab7/Ncln/Scrib/Zdhhc3/Rab8a/Emc10/Rab11b/Clip1/Ap3b1/Gdi1/Snx27/Zdhhc6/Golga7/Mtch1/Sec61b/Tmco1/Nsf/Tsc2/Gga1/Zdhhc7/Vamp4/Srprb/Golph3l/Snap47/Micall1/Bbc3/Sec61a2/Afdn/Trmt10b/Zdhhc24/Srp54a/Zdhhc1/Bbs2/Colq/Rilpl1	41
BP	GO:0002262	myeloid cell homeostasis	35/2090	215/28891	5.30817e-06	0.000121076	8.90896e-05	Mthfd1/Ptbp3/Smarca4/Cd44/Med1/Ptpn2/Mapk14/Zfpm1/Srf/Ireb2/Axin1/Jmjd6/Ncstn/Rcor1/Exoc6/Foxo3/Sh2b3/Bcl2l11/Arid4a/Rb1/Setd1a/Uba5/Fech/Tgfbr3/Lipa/Myb/Smap1/Fancc/Csf1/Dyrk3/Bcl6/Acvr2a/Slc7a11/P4htm/Gata1	35
BP	GO:0034250	positive regulation of amide metabolic process	30/2090	171/28891	5.32727e-06	0.000121076	8.90896e-05	Eif4g1/Ptbp1/Larp1/C1qbp/Mapk1/Khdrbs1/Abcf1/Ogt/Ago2/Eif4a3/Eif4g3/Uhmk1/Nat10/Ptk2b/Eif2b5/Dnajc3/Fmr1/Fxr1/Abca2/Gsk3a/Polr2g/Pcif1/Pym1/Mettl3/Csnk1e/Impact/Rmnd1/Mettl5/Rbm4/Rpusd3	30
BP	GO:0030433	ubiquitin-dependent ERAD pathway	19/2090	83/28891	5.65675e-06	0.000128066	9.4233e-05	Canx/Hsp90b1/Bag6/Ubqln1/Usp19/Bcap31/Ube2j1/Ube2j2/Aup1/Man1a2/Herpud1/Os9/Sec61b/Man1b1/Derl2/Selenos/Ubqln2/Erlec1/Fbxo17	19
BP	GO:0006497	protein lipidation	21/2090	98/28891	5.68194e-06	0.00012814	9.42872e-05	Nmt1/Zdhhc3/Pigt/Pigq/Zdhhc6/Golga7/Gpaa1/Wipi2/Dbi/Pigs/Selenok/Zdhhc8/Zdhhc7/Pign/Zdhhc16/Pigl/Zdhhc24/Pigyl/Zdhhc1/Wdr45/Pgap3	21
BP	GO:0031667	response to nutrient levels	57/2090	427/28891	5.73957e-06	0.000128942	9.48773e-05	Eif4g1/Mybbp1a/Larp1/Cad/Atf4/Mapk1/Ogt/Akt1/Eif2a/Foxk2/Sec13/Ehmt2/Med1/Stk24/Mapk14/Srf/Ireb2/Suv39h1/Eif4ebp1/Foxk1/Cdkn1a/Rheb/Stk39/Snw1/Wipi2/Gabarap/Tsc2/Crebbp/Rptor/Foxo3/Alad/Kat5/Flcn/Acadm/Tbc1d5/Xpr1/Pik3c2a/Tmem135/Ncoa1/Clec16a/Impact/Mfsd2a/Dapl1/Zc3h12a/Prkag1/Oma1/Lipa/Sik2/Suox/Prkab2/Wdr45/Arsb/Gpr155/Bbs2/Otud3/Cd68/Fes	57
BP	GO:0031668	cellular response to extracellular stimulus	41/2090	271/28891	5.76806e-06	0.000129085	9.49828e-05	Eif4g1/Mybbp1a/Atf4/Mapk1/Ogt/Sec13/Ehmt2/Sipa1/Med1/Stk24/Srf/Ireb2/Suv39h1/Cdkn1a/Rheb/Snw1/Wipi2/Gabarap/Tsc2/Crebbp/Rptor/Kat5/Flcn/Xpr1/Pik3c2a/Arhgap35/Ncoa1/Clec16a/Impact/Nr4a2/Mfsd2a/Dapl1/Zc3h12a/Prkag1/Sik2/Prkab2/Wdr45/Gpr155/Otud3/Cd68/Fes	41
BP	GO:0021915	neural tube development	33/2090	198/28891	5.82912e-06	0.000129954	9.5622e-05	Brd2/Mthfd1/Mthfd1l/Arid1a/Vasp/Notch1/Tgfb1/Gatad2a/Scrib/Med12/Nup133/Kdm2b/Ski/Kat2a/Abl1/Mib1/Tsc2/Prkaca/Ambra1/Specc1l/Ipmk/Celsr1/Ssbp3/Kat5/Sufu/Ift52/Arhgap35/Luzp1/Mks1/Rab23/Sall2/Rarg/Vangl2	33
BP	GO:0016573	histone acetylation	16/2090	62/28891	5.93523e-06	0.000131534	9.67844e-05	Mybbp1a/Noc2l/Baz1b/Smarca4/Tgfb1/Msl2/Kat6a/Actl6a/Kat2a/Kansl3/Crebbp/Nfyc/Kat14/Kat5/Kat8/Hdac8	16
BP	GO:2000036	regulation of stem cell population maintenance	18/2090	76/28891	5.94503e-06	0.000131534	9.67844e-05	Ogt/Smarcc1/Smarca4/Arid1a/Zfp706/Phf10/Kdm2b/Actl6a/Kat2a/Dpf2/Zc3h13/Cnot3/Sinhcaf/Arid4a/Smarcd1/Arid4b/Bcl7a/Smarca2	18
BP	GO:0098876	vesicle-mediated transport to the plasma membrane	28/2090	155/28891	6.08695e-06	0.000133914	9.85362e-05	Rab8b/Csk/Rab10/Rab7/Scrib/Rab8a/Sec16a/Rab11b/Snx27/Golga7/Acap2/Nsf/Exoc6/Llgl1/Lmtk2/Gga1/Stx16/Ankrd50/Vamp4/Golph3l/Snap47/Eipr1/Rab11fip3/Dennd1a/Exoc8/Micall1/Ehd3/Bbs2	28
BP	GO:0000045	autophagosome assembly	23/2090	114/28891	6.09848e-06	0.000133914	9.85362e-05	Atp2a2/Rab7/Ubqln1/Ehmt2/Pip4k2b/Wipi2/Ubxn2a/Gabarap/Trp53inp1/Mfn2/Sec22b/Ambra1/Tcirg1/Pacs2/Ubqln2/Atg2a/Atg9b/Rab23/Wdr45/Trp53inp2/Rab19/Rab43/Efnb1	23
BP	GO:0006520	amino acid metabolic process	41/2090	272/28891	6.32468e-06	0.000138361	0.000101808	Shmt2/Cad/Atf4/Gart/Mthfd1/Pfas/Txnrd1/Farsb/Htt/Got1/Psph/Gfpt1/Lrrc47/Mri1/Icmt/Bckdk/Apc/Mtrr/Bcat2/Mars2/Spr/Gclm/Cars2/Dalrd3/Enoph1/Hars2/Sars2/Aars2/Ctps2/Gpt2/Dglucy/Thap4/Gatb/Slc39a8/Apip/Wars2/Gls2/Aldh4a1/Gcat/Atp7a/Slc7a11	41
BP	GO:0006470	protein dephosphorylation	37/2090	235/28891	6.41392e-06	0.00013979	0.00010286	Ptbp1/Ywhae/Hsp90b1/Ppp1ca/Ppm1g/Calm3/Ptp4a3/Htt/Ptpa/Tgfb1/Cdc25a/Ppp1r12a/Ikbkb/Ptpn2/Dusp5/Ppp2r5d/Ssh2/Mprip/Arpp19/Ppp1r9b/Pten/Ctdp1/Ambra1/Sdhaf2/Akap1/Ptpn4/Dusp7/Cnep1r1/Mgat5/Mastl/Fam220a/Btrc/Cry2/Ppm1l/Dusp14/Cdkn3/Ptpdc1	37
BP	GO:0006403	RNA localization	30/2090	173/28891	6.77632e-06	0.000147139	0.000108267	Hnrnpab/Nup210/Tpr/Khsrp/Wnk1/Khdrbs1/Eif4a3/Slbp/Nup188/Exosc10/Htt/Nup93/Yy1/Pom121/Nol6/Rbm8a/Sec13/Nup214/Sidt2/Fmr1/Nup133/Pnpt1/Rbm15b/Casc3/Hsf1/Phax/Zc3h11a/Zc3h3/Arc/Tst	30
BP	GO:0009991	response to extracellular stimulus	60/2090	460/28891	6.86983e-06	0.000148617	0.000109355	Eif4g1/Mybbp1a/Larp1/Cad/Atf4/Mapk1/Ogt/Akt1/Eif2a/Foxk2/Sec13/Ehmt2/Sipa1/Med1/Stk24/Mapk14/Srf/Ireb2/Suv39h1/Eif4ebp1/Foxk1/Cdkn1a/Rheb/Stk39/Snw1/Wipi2/Gabarap/Tsc2/Crebbp/Rptor/Foxo3/Alad/Kat5/Flcn/Acadm/Tbc1d5/Xpr1/Pik3c2a/Tmem135/Arhgap35/Ncoa1/Clec16a/Impact/Nr4a2/Mfsd2a/Dapl1/Zc3h12a/Prkag1/Oma1/Lipa/Sik2/Suox/Prkab2/Wdr45/Arsb/Gpr155/Bbs2/Otud3/Cd68/Fes	60
BP	GO:0046580	negative regulation of Ras protein signal transduction	15/2090	56/28891	7.02714e-06	0.000151459	0.000111446	Rapgef1/Dgkz/Cul3/Heg1/Git1/Mfn2/Spry1/Flcn/Rasa3/Kctd10/Arhgap35/Scai/Bcl6/Itga3/Spry2	15
BP	GO:0006900	vesicle budding from membrane	18/2090	77/28891	7.23789e-06	0.00015486	0.000113948	Sar1a/Cul3/Sec13/Sec31a/Sec16a/Trappc10/Pdcd6/Gbf1/Mia3/Arfgap2/Chmp5/Trappc6b/Prkci/Myo18a/Golph3l/Trappc9/Chmp6/Wasl	18
BP	GO:0007015	actin filament organization	61/2090	471/28891	7.23793e-06	0.00015486	0.000113948	Lcp1/Myh9/Tpm3/Actr2/Hsp90b1/Flna/Actn4/Capzb/Limd2/Sptan1/Ezr/Pak2/Cotl1/Vasp/Dbnl/Mtpn/Coro1c/Wasf2/Diaph1/Cul3/Trim27/Ptk2b/Arpc4/Evl/Hax1/Actn1/Srf/Coro1b/Rhog/Clasp1/Ssh2/Cd2ap/Ppp1r9b/Abl1/Was/Zyx/Myo5a/Capn1/Tpm3-rs7/Rasa1/Dlg1/Specc1l/Rhoh/Ptger4/Prkci/Gba2/Arhgap35/Limk1/Gmfg/Spire1/Ttc17/Wasl/Alms1/Pacsin1/Rflnb/Tesk1/Kank3/Cdc42ep3/Cttn/Pfn2/Sh3d21	61
BP	GO:1900180	regulation of protein localization to nucleus	29/2090	165/28891	7.31343e-06	0.000155606	0.000114497	Hnrnpm/Trim28/Flna/Tpr/Mapk1/Parp1/Ogt/Akt1/Htt/Tgfb1/Mapk14/Hdac3/Cd2ap/Rbm22/Mcrs1/Trim8/Ei24/Mepce/Mark3/Crebbp/Tyk2/Ufm1/Akap1/Flcn/Atp13a2/Zc3h12a/Tesk1/Rab23/Dclk1	29
BP	GO:0051236	establishment of RNA localization	27/2090	148/28891	7.32606e-06	0.000155606	0.000114497	Nup210/Tpr/Khsrp/Wnk1/Khdrbs1/Eif4a3/Slbp/Nup188/Htt/Nup93/Pom121/Nol6/Rbm8a/Sec13/Nup214/Sidt2/Fmr1/Nup133/Pnpt1/Rbm15b/Casc3/Hsf1/Phax/Zc3h11a/Zc3h3/Arc/Tst	27
BP	GO:0051058	negative regulation of small GTPase mediated signal transduction	16/2090	63/28891	7.42452e-06	0.000157126	0.000115615	Rapgef1/Dgkz/Cul3/Heg1/Git1/Cd2ap/Mfn2/Spry1/Flcn/Rasa3/Kctd10/Arhgap35/Scai/Bcl6/Itga3/Spry2	16
BP	GO:0031110	regulation of microtubule polymerization or depolymerization	20/2090	92/28891	7.48408e-06	0.000157814	0.000116122	Fkbp4/Numa1/Clasp1/Git1/Clip1/Dctn1/Tbcd/Abl1/Map1s/Apc/Specc1l/Hdgfl3/Psrc1/Camsap1/Slain1/Gba2/Eml2/Hdac6/Wdr47/Fes	20
BP	GO:0001838	embryonic epithelial tube formation	28/2090	157/28891	7.83955e-06	0.000164572	0.000121094	Brd2/Mthfd1/Mthfd1l/Ctnnb1/Arid1a/Vasp/Tgfb1/Gatad2a/Scrib/Med12/Kdm2b/Ski/Kat2a/Abl1/Mib1/Tsc2/Prkaca/Specc1l/Ipmk/Celsr1/Sufu/Ift52/Arhgap35/Luzp1/Mks1/Rab23/Rarg/Vangl2	28
BP	GO:0071826	protein-RNA complex organization	31/2090	183/28891	7.8609e-06	0.000164572	0.000121094	Fau/Eif5/Ago2/Celf2/Bop1/Puf60/Sf3a1/Nudt21/Snrpd3/Dhx30/Rrs1/Traf7/Sf3a2/Prmt7/Rrp7a/Cdc73/Ago1/Lsm2/Prpf39/Dhx29/Isy1/Crnkl1/Tfip11/Slu7/Polr2d/Coil/Gemin2/Ptbp2/Gcfc2/Dyrk3/Rpl24	31
BP	GO:1902459	positive regulation of stem cell population maintenance	14/2090	50/28891	8.05966e-06	0.00016813	0.000123713	Ogt/Smarcc1/Smarca4/Arid1a/Phf10/Kdm2b/Actl6a/Dpf2/Sinhcaf/Arid4a/Smarcd1/Arid4b/Bcl7a/Smarca2	14
BP	GO:0042326	negative regulation of phosphorylation	51/2090	372/28891	8.28781e-06	0.000172274	0.000126762	Eif4g1/Prkar1a/Suz12/Dnaja1/Wnk1/Csk/Ogt/Akt1/Coro1c/Cblb/Tgfb1/Trim27/Hipk3/Rtraf/Dnajc3/Heg1/Ggnbp2/Mllt1/Ptpn2/Ppp2r5d/Crkl/Cactin/Cdkn1a/Prkar2a/Fem1a/Hexim1/Abl1/Prpsap1/Pkn1/Spag9/Tsc2/Pten/Apc/Spry1/Rb1/Dusp7/Akt1s1/Chmp6/Impact/Prkag2/Fbxo7/Zc3h12a/Cdkn2c/Fam72a/Tesk1/Dgkq/Cox11/Prkar2b/Spry2/Ager/Camk2n2	51
BP	GO:0036503	ERAD pathway	22/2090	109/28891	9.5664e-06	0.000198147	0.000145799	Canx/Hsp90b1/Bag6/Ubqln1/Eif2a/Usp19/Ubxn1/Bcap31/Ube2j1/Ube2j2/Aup1/Man1a2/Herpud1/Os9/Sec61b/Man1b1/Derl2/Selenos/Ubqln2/Dnajb12/Erlec1/Fbxo17	22
BP	GO:0099504	synaptic vesicle cycle	36/2090	230/28891	9.71671e-06	0.000200549	0.000147567	Arhgdia/Canx/Rap1b/Atp2a2/Ctbp1/Ctnnb1/Bcl2l1/Ap2b1/Diaph1/Scrib/Fmr1/Git1/Git2/Atp6v1b2/Atp6v1f/Atp6v1h/Pip5k1c/Pten/Prkaca/Atp6v1e1/Atp6v1d/Stxbp5/Synj1/Btbd9/Vamp4/Snap47/Dennd1a/Pacsin1/Vps18/Fcho2/Dgkq/Slc4a8/Grik5/Sh3gl3/Slc18a2/Pfn2	36
BP	GO:0035304	regulation of protein dephosphorylation	19/2090	86/28891	9.80603e-06	0.00020168	0.000148399	Ptbp1/Ywhae/Hsp90b1/Calm3/Htt/Ptpa/Tgfb1/Ppp1r12a/Ikbkb/Ppp2r5d/Mprip/Arpp19/Ppp1r9b/Ambra1/Akap1/Cnep1r1/Mgat5/Mastl/Cry2	19
BP	GO:2001242	regulation of intrinsic apoptotic signaling pathway	32/2090	194/28891	9.98454e-06	0.00020463	0.00015057	Ybx3/Sfpq/Atf4/Noc2l/Dnaja1/Parp1/Ctnnb1/Cd44/Akt1/Bcl2l1/Ubqln1/Usp15/Rrn3/Ppif/Ptpn2/Bcap31/Mdm2/Uri1/Plscr1/Erp29/Herpud1/Ei24/Bcl2l11/Eno1b/Selenos/Flcn/Rad9a/Cep63/Fbxo7/Bbc3/Creb3/Gsdme	32
BP	GO:0006997	nucleus organization	26/2090	142/28891	1.00269e-05	0.000204781	0.000150681	Lmnb1/Nup93/Pom121/Usp36/Rrn3/Fxr1/Nup133/Suv39h1/Dctn1/Emd/Phf2/Uspl1/Ubxn2a/Agap3/Lmnb2/Reep3/Tmem201/Tbpl1/Phf8/Bend3/Kat5/Chmp5/Epc1/Chmp6/Dyrk3/Rnf8	26
BP	GO:0006305	DNA alkylation	14/2090	51/28891	1.0373e-05	0.000210377	0.000154798	Dnmt1/Mta2/Parp1/Smarca4/Kmt2a/Ehmt2/Ehmt1/Atf7ip/Gnas/Mtrr/Arid4a/Arid4b/Bend3/Mbd4	14
BP	GO:0006306	DNA methylation	14/2090	51/28891	1.0373e-05	0.000210377	0.000154798	Dnmt1/Mta2/Parp1/Smarca4/Kmt2a/Ehmt2/Ehmt1/Atf7ip/Gnas/Mtrr/Arid4a/Arid4b/Bend3/Mbd4	14
BP	GO:0043648	dicarboxylic acid metabolic process	20/2090	94/28891	1.05339e-05	0.000212901	0.000156656	Shmt2/Mdh2/Atic/Mthfd1/Sdha/Ogdh/Mthfd1l/Dlst/Htt/Got1/Suclg1/Apc/Mtrr/Gclm/Gpt2/Dglucy/Gls2/Aldh4a1/Aldh1l2/Slc7a11	20
BP	GO:0061014	positive regulation of mRNA catabolic process	21/2090	102/28891	1.09721e-05	0.000220382	0.000162161	Pabpc1/Khsrp/Eif4enif1/Ago2/Upf1/Zc3h12d/Fxr1/Pum1/Pnpt1/Polr2g/Cnot3/Patl1/Dcp1a/Tut7/Fto/Mlh1/Dcps/Rc3h2/Mettl3/Lsm1/Zc3h12a	21
BP	GO:1901653	cellular response to peptide	48/2090	346/28891	1.09795e-05	0.000220382	0.000162161	Prkar1a/Rangap1/Ide/Mapk1/Parp1/Csk/Ogt/Nr4a3/Smarcc1/Eif4ebp2/Ctnnb1/Akt1/Stat6/Rab10/Ahcyl1/Rab8a/Ptpn2/Mdm2/Eif4ebp1/Pip4k2b/Zfp592/Leprotl1/Gsk3a/Myo5a/Mfn2/Hsf1/Crk/Tsc2/Pten/Apc/Tyk2/Gnas/Prkaca/Rb1/Zdhhc7/Chmp5/Prkci/Ankrd26/Ncoa1/Nr4a2/Leprot/Trim41/Gpam/Sik2/Slc2a8/Rbm4/Fut7/Ager	48
BP	GO:1902107	positive regulation of leukocyte differentiation	34/2090	213/28891	1.10704e-05	0.000220691	0.000162388	Smarcc1/Smarca4/Cbfb/Arid1a/Tgfb1/Pbrm1/Smarcc2/Phf10/Hax1/Notch2/Actl6a/Ap3b1/Arid1b/Hsf1/Rptor/Gnas/Ambra1/Rhoh/Rb1/Smarcd1/Kat5/Tmem64/Il15ra/Smarca2/Sox12/Fadd/Klhl25/Csf1/Wnt10b/Bcl6/Ctnnbip1/Ager/Fes/Cd1d1	34
BP	GO:1903708	positive regulation of hemopoiesis	34/2090	213/28891	1.10704e-05	0.000220691	0.000162388	Smarcc1/Smarca4/Cbfb/Arid1a/Tgfb1/Pbrm1/Smarcc2/Phf10/Hax1/Notch2/Actl6a/Ap3b1/Arid1b/Hsf1/Rptor/Gnas/Ambra1/Rhoh/Rb1/Smarcd1/Kat5/Tmem64/Il15ra/Smarca2/Sox12/Fadd/Klhl25/Csf1/Wnt10b/Bcl6/Ctnnbip1/Ager/Fes/Cd1d1	34
BP	GO:0000075	cell cycle checkpoint signaling	33/2090	204/28891	1.1141e-05	0.000220803	0.00016247	Tpr/Ccng1/Dot1l/Dgkz/Trrap/Brd4/Ints7/Rbm38/Ik/Zwint/Clspn/Mapk14/Mdm2/Cdkn1a/Mtbp/Rbbp8/Hsf1/Uimc1/Apc/Brca2/Rad9a/Nek1/Hinfp/Haspin/Zfyve19/Fbxo31/Usp28/Xrcc3/Abraxas1/Mbd4/Xpc/Rpl24/Setmar	33
BP	GO:0031060	regulation of histone methylation	9/2090	22/28891	1.11517e-05	0.000220803	0.00016247	Hcfc1/Ogt/Ehmt2/Mcrs1/Ehmt1/Kansl1/Kansl3/Nelfa/Kat8	9
BP	GO:1902850	microtubule cytoskeleton organization involved in mitosis	28/2090	160/28891	1.13426e-05	0.000223824	0.000164693	Flna/Tpr/Nudc/Dync1h1/Numa1/Htt/Ptpa/Stag1/Pcnt/Clasp1/Hdac3/Dctn1/Map1s/Kifc1/Kif2a/Spry1/Pkd1/Mzt1/Golga2/Psrc1/Kat5/Chmp5/Chmp6/Abraxas1/Gpsm1/Plk2/Spry2/Map10	28
BP	GO:0051571	positive regulation of histone H3-K4 methylation	7/2090	13/28891	1.19335e-05	0.000234693	0.00017269	Hcfc1/Ogt/Mcrs1/Kansl1/Kansl3/Nelfa/Kat8	7
BP	GO:0008654	phospholipid biosynthetic process	35/2090	223/28891	1.20732e-05	0.000236643	0.000174125	Isyna1/Dgkz/Idi1/Dgkd/Pi4ka/Fabp5/Abca2/Pigt/Pigq/Vac14/Plscr1/Pip4k2b/Gpaa1/Pip5k1c/Pigs/Ttc7/Dhdds/Sptlc2/Tamm41/Pign/Ttc7b/Hdhd5/Pik3c2a/Dhrs7b/Pcyt1a/Inpp4a/Dgke/Ptdss2/Gpam/Dgkq/Pigl/Pigyl/Sla2/Pgap3/Lcat	35
BP	GO:0044272	sulfur compound biosynthetic process	23/2090	119/28891	1.28315e-05	0.000250665	0.000184443	Mthfd1/Ctnnb1/Dlat/Extl3/Mri1/Mtrr/Chpf/Ext2/Slc35b2/Slc19a2/Enoph1/Ndst1/Hs6st1/Gcdh/Slc35d1/Glce/Apip/Pxylp1/Tpk1/Acss1/Chst14/Vangl2/B4galt4	23
BP	GO:0051053	negative regulation of DNA metabolic process	26/2090	144/28891	1.2991e-05	0.000252934	0.000186113	Hnrnpc/Trim28/Sub1/Parp1/Ndfip1/Exosc10/Msh6/Nat10/Ubqln4/Gmnn/Cdkn1a/Ctc1/Mcrs1/Abl1/Hsf1/Mlh1/Slx4/Kat5/Flcn/Smg6/Rnf169/Ercc4/H1f0/Aunip/Shld2/Bcl6	26
BP	GO:0045911	positive regulation of DNA recombination	17/2090	73/28891	1.36111e-05	0.000264128	0.000194349	Actr2/Parp1/Nsd2/Stat6/Trrap/Tgfb1/Paxip1/Actl6a/Mms19/Was/Mlh1/Kat5/Epc1/Vps72/Helq/Ing3/Shld2	17
BP	GO:0006304	DNA modification	19/2090	88/28891	1.39215e-05	0.000269256	0.000198123	Hnrnpab/Dnmt1/Trim28/Mta2/Parp1/Smarca4/Kmt2a/Ehmt2/Ehmt1/Atf7ip/Fto/Gnas/Mtrr/Arid4a/Arid4b/Bend3/Tet2/Mbd4/Cdadc1	19
BP	GO:0000723	telomere maintenance	26/2090	145/28891	1.47534e-05	0.000283419	0.000208544	Hnrnpc/Mapk1/Parp1/Ctnnb1/Exosc10/Upf1/Nat10/Yy1/Uchl5/Actl6a/Ylpm1/Ctc1/Mcrs1/Ino80/Xrn1/Brca2/Slx4/Smg6/Rad51d/Ercc4/Nsmce2/Xrcc3/Shld2/Zfp365/Hdac8/Rad51c	26
BP	GO:0006898	receptor-mediated endocytosis	40/2090	272/28891	1.47828e-05	0.000283419	0.000208544	Canx/Ezr/Cd44/Ap2b1/Ankrd13a/Dgkd/Scrib/Dnajc13/Fmr1/Abca2/Snx1/Vac14/Cd2ap/Ap2a1/Pip5k1c/Nsf/Mtmr2/Tnk2/Ubqln2/Atxn2/Sh3glb2/Tbc1d5/Synj1/Calcrl/Arhgap27/Rin3/Rnf216/Lmbr1l/Micall1/Wasl/Pacsin1/Plk2/Fcho2/Smap1/Cd9/Sdc1/Arc/Sh3gl3/Cttn/Grk4	40
BP	GO:1901989	positive regulation of cell cycle phase transition	23/2090	120/28891	1.47993e-05	0.000283419	0.000208544	Eif4g1/Rcc2/Phb2/Lmnb1/Ankrd17/Akt1/Brd4/Tgfb1/Cul3/Cdc25a/Mdm2/Cdc73/Cdc7/Mepce/Mtbp/Crebbp/Rptor/Rb1/Nsmce2/Lsm11/Wnt10b/Dyrk3/Rad51c	23
BP	GO:0046486	glycerolipid metabolic process	51/2090	380/28891	1.499e-05	0.000286132	0.00021054	Phb2/Dgkz/Hadha/Dgkd/Pi4ka/Fabp5/Pigt/Pigq/Vac14/Plscr1/Pip4k2b/Gpaa1/Abhd2/Dbi/Pip5k1c/Pigs/Ttc7/Pten/Mtmr2/Tamm41/Kat5/Synj1/Mtmr9/Pign/Cnep1r1/Ttc7b/Abhd12/Hdhd5/Pik3c2a/Pitpnc1/Dhrs7b/Acp6/Mfsd2a/Pcyt1a/Inpp4a/Dgke/Lipa/Ptdss2/Inpp5e/Gpam/Pip4p2/Dgkq/Daglb/Pigl/Pigyl/Sla2/Gk5/Pgap3/Apobr/Thrb/Lcat	51
BP	GO:0045926	negative regulation of growth	39/2090	263/28891	1.54662e-05	0.000294261	0.000216522	Smarca4/Tgfb1/Zc3h12d/Yy1/Pnpt1/Ifrd1/Foxk1/Rai1/Cdkn1a/Ppp1r9b/Gsk3a/Ei24/Spag9/Pten/Apc/Dip2b/Ctdp1/Gnas/Zmat3/Jarid2/Eno1b/Rb1/Atxn2/Psrc1/Ankrd26/Smarca2/Mapk11/Bbc3/Alms1/Cdkn2c/St7l/Adam15/Prdm11/P3h1/Bcl6/Bbs2/Stc2/Sertad3/Eaf2	39
BP	GO:0031346	positive regulation of cell projection organization	59/2090	463/28891	1.65457e-05	0.000313776	0.000230881	Ptbp1/Actr2/Flna/Rab8b/Rapgef1/Dbnl/Htt/Coro1c/Wasf2/Ptk2b/Map2k2/Rrn3/Sf3a2/Nptn/Fmr1/Stk24/Ikbkb/Atf1/Srf/Mark2/Coro1b/Ppp2r5d/Clip1/Nin/Gdi1/Kat2a/Ap2a1/Abl1/Mfn2/Tsc2/Atmin/Apc/Golga2/Enc1/Prkci/Tiam1/Def8/Zfyve27/Arhgap35/Limk1/Mob2/Fbxo31/Plxna1/Crtc1/Wasl/Pacsin1/Parp6/Mien1/Afdn/P3h1/Atp7a/Arsb/Itga3/Cdc42ep3/Ss18l1/Amigo1/Dynlt1a/Serpinf1/Fes	59
BP	GO:0051568	histone H3-K4 methylation	9/2090	23/28891	1.71436e-05	0.000324064	0.000238451	Hcfc1/Ogt/Kmt2a/Mcrs1/Kansl1/Kansl3/Nelfa/Setd1a/Kat8	9
BP	GO:0001933	negative regulation of protein phosphorylation	47/2090	342/28891	1.72648e-05	0.000325302	0.000239362	Eif4g1/Prkar1a/Suz12/Dnaja1/Ogt/Akt1/Coro1c/Cblb/Tgfb1/Trim27/Hipk3/Rtraf/Dnajc3/Heg1/Ggnbp2/Mllt1/Ptpn2/Ppp2r5d/Crkl/Cactin/Cdkn1a/Prkar2a/Fem1a/Hexim1/Abl1/Pkn1/Spag9/Tsc2/Pten/Apc/Spry1/Rb1/Dusp7/Akt1s1/Chmp6/Impact/Prkag2/Fbxo7/Zc3h12a/Cdkn2c/Fam72a/Tesk1/Dgkq/Prkar2b/Spry2/Ager/Camk2n2	47
BP	GO:0016579	protein deubiquitination	21/2090	105/28891	1.75047e-05	0.000328761	0.000241907	Shmt2/Eif3f/Usp24/Usp15/Usp36/Usp19/Uchl5/Usp5/Usp10/Ubxn1/Atxn7l3/Usp37/Usp31/Usp12/Usp21/Usp28/Abraxas1/Zc3h12a/Usp20/Otud3/Uchl4	21
BP	GO:0001837	epithelial to mesenchymal transition	28/2090	164/28891	1.82263e-05	0.000341218	0.000251073	Hnrnpab/Trim28/Flna/Tcof1/Ddx17/Ctnnb1/Notch1/Nfatc1/Tgfb1/Akna/Clasp1/Pdcd6/Tsc2/Smad2/Pten/Spry1/Sdhaf2/Tiam1/Tgfbr3/Pofut2/Rflnb/Adam15/Zfp703/Phldb1/Vasn/Vangl2/Spry2/Ager	28
BP	GO:1902903	regulation of supramolecular fiber organization	52/2090	393/28891	1.84597e-05	0.000344482	0.000253475	Fkbp4/Flna/Capzb/Sptan1/Pak2/Cotl1/Numa1/Vasp/Dbnl/Mtpn/Wasf2/Trim27/Ptk2b/Evl/Hax1/Coro1b/Clasp1/Git1/Clip1/Dctn1/Ssh2/Tbcd/Abl1/Was/Map1s/Capn1/Rasa1/Mfn2/Dlg1/Apc/Pfdn6/Specc1l/Rb1/Hdgfl3/Ptger4/Psrc1/Camsap1/Slain1/Gba2/Arhgap35/Eml2/Limk1/Hdac6/Gmfg/Alms1/Wdr47/Tesk1/Kank3/Cdc42ep3/Cttn/Fes/Pfn2	52
BP	GO:0006457	protein folding	29/2090	173/28891	1.86549e-05	0.000347016	0.00025534	Canx/Hsp90b1/Fkbp4/Dnaja1/Dnaja2/Nudc/St13/Ahsa1/Dnajc7/Dnajb6/Dnajc3/Ppif/Fkbp5/Tbcd/Aip/Unc45a/Pfdn6/Dnajc1/Pdrg1/Dnajb12/Grpel2/Dnajb5/Entpd5/Sdf2/Pofut2/Ahsa2/Fkbp2/Qsox1/P3h1	29
BP	GO:0035148	tube formation	30/2090	182/28891	1.88901e-05	0.000350277	0.000257739	Brd2/Mthfd1/Mthfd1l/Ctnnb1/Arid1a/Vasp/Notch1/Tgfb1/Gatad2a/Scrib/Med12/Kdm2b/Ski/Kat2a/Abl1/Mib1/Tsc2/Prkaca/Bcl2l11/Specc1l/Ipmk/Celsr1/Sufu/Ift52/Arhgap35/Luzp1/Mks1/Rab23/Rarg/Vangl2	30
BP	GO:0051298	centrosome duplication	17/2090	75/28891	1.98962e-05	0.000367764	0.000270606	Pdcd6ip/Nat10/Kat2a/Kifc1/Brca2/Nubp1/Fbxw5/Chmp5/Cep76/Cep63/Poc1b/Xrcc3/Cep44/Alms1/Plk2/Cetn4/Cep131	17
BP	GO:2001251	negative regulation of chromosome organization	20/2090	98/28891	2.01837e-05	0.000371901	0.000273651	Hnrnpc/Mcm2/Baz1b/Sub1/Tpr/Rad21/Parp1/Exosc10/Nat10/Ik/Zwint/Ctc1/Mcrs1/Apc/Slx4/Smg6/Haspin/Ercc4/Xrcc3/Setmar	20
BP	GO:0072659	protein localization to plasma membrane	44/2090	315/28891	2.1103e-05	0.000387619	0.000285216	Flna/Rab8b/Wnk1/Csk/Ezr/Atp1b3/Akt1/Bcl2l1/Rab10/Rab7/Tgfb1/Scrib/Efr3a/Zdhhc3/Rab8a/Ikbkb/Sec16a/Rhog/Snx27/Ppp1r9b/Golga7/Myo5a/Nsf/Ttc7/Dlg1/Gga1/Pacs2/Zdhhc7/Prkci/Ttc7b/Vamp4/Tspan14/Zfyve27/Golph3l/Stx8/Pacsin1/Fcho2/Ehd3/Afdn/Rab11fip2/Bbs2/Itga3/Rab3d/Rilpl1	44
BP	GO:0035710	CD4-positive, alpha-beta T cell activation	24/2090	131/28891	2.14321e-05	0.000392429	0.000288755	Ndfip1/Cbfb/Cd44/Stat6/Cblb/Tgfb1/Kmt2a/Ly9/Tcirg1/Ptger4/Rc3h2/Card11/Armc5/Tnfrsf14/Zc3h12a/Myb/Klhl25/Cracr2a/Bcl6/Atp7a/Ctsl/Il18r1/Fut7/Ager	24
BP	GO:1902115	regulation of organelle assembly	35/2090	229/28891	2.15952e-05	0.00039418	0.000290043	Lcp1/G3bp1/Msn/Tpr/Ubap2l/Ezr/Dync1h1/Akt1/Numa1/Htt/Pdcd6ip/Ptk2b/Ehmt2/Usp10/Kat2a/Pip4k2b/Mfn2/Sec22b/Atmin/Ubqln2/Chmp5/Atg2a/Cep76/Arhgap35/Chmp6/Rab11fip3/Cdk10/Alms1/Plk2/Tesk1/Tbc1d30/Wdr45/Sdc1/Efnb1/Nbdy	35
BP	GO:0051569	regulation of histone H3-K4 methylation	7/2090	14/28891	2.23707e-05	0.000407063	0.000299523	Hcfc1/Ogt/Mcrs1/Kansl1/Kansl3/Nelfa/Kat8	7
BP	GO:0031647	regulation of protein stability	44/2090	316/28891	2.28302e-05	0.000414135	0.000304727	Hcfc1/Flna/Phb2/Atp1b3/Bag6/Htt/Ipo9/Cul3/Usp36/Usp19/Ncln/Tbl1x/Dad1/Ncor2/Mdm2/Sec16a/Mapk8ip3/Hdac3/Wiz/Kat2a/Ddi2/Cdc73/Golga7/Atf7ip/Pten/Crebbp/Mtrr/Pex6/Mtmr9/Gipc1/Cep63/Tnip2/Hdac6/Usp28/Cog7/Fbxo7/Btrc/Taf9b/Wnt10b/P3h1/Hdac8/Otud3/Apbb2/Pfn2	44
BP	GO:0000422	autophagy of mitochondrion	19/2090	91/28891	2.30173e-05	0.000414951	0.000305327	Huwe1/Phb2/Ogt/Htt/Gsk3a/Cisd2/Wipi2/Gabarap/Mfn2/Ambra1/Vps13d/Atg2a/Rnf41/Hdac6/Clec16a/Fbxo7/Atg9b/Wdr45/Cttn	19
BP	GO:0061726	mitochondrion disassembly	19/2090	91/28891	2.30173e-05	0.000414951	0.000305327	Huwe1/Phb2/Ogt/Htt/Gsk3a/Cisd2/Wipi2/Gabarap/Mfn2/Ambra1/Vps13d/Atg2a/Rnf41/Hdac6/Clec16a/Fbxo7/Atg9b/Wdr45/Cttn	19
BP	GO:0022618	protein-RNA complex assembly	29/2090	175/28891	2.32996e-05	0.000418747	0.000308121	Fau/Eif5/Ago2/Celf2/Bop1/Puf60/Sf3a1/Nudt21/Snrpd3/Dhx30/Rrs1/Traf7/Sf3a2/Prmt7/Rrp7a/Cdc73/Ago1/Lsm2/Prpf39/Dhx29/Isy1/Crnkl1/Slu7/Polr2d/Coil/Gemin2/Ptbp2/Gcfc2/Rpl24	29
BP	GO:1902807	negative regulation of cell cycle G1/S phase transition	17/2090	76/28891	2.3916e-05	0.000428507	0.000315302	Dgkz/Zc3h12d/Rbm38/Mdm2/Rbl1/Cdkn1a/Cdc73/Dlg1/Pten/Apc/Rb1/Zfp655/Haspin/Rbl2/Fbxo31/Fbxo7/E2f7	17
BP	GO:0010212	response to ionizing radiation	24/2090	132/28891	2.442e-05	0.00043487	0.000319984	Bcl2l1/Tgfb1/Mta1/Ints7/Paxip1/Mapk14/Mdm2/Aen/Cdkn1a/Ino80/Hsf1/Tlk2/Uimc1/Brca2/Rnf168/Kat5/Rad9a/Nek1/Ercc8/Usp28/Abraxas1/Bbc3/Lig4/Rnf8	24
BP	GO:0048259	regulation of receptor-mediated endocytosis	24/2090	132/28891	2.442e-05	0.00043487	0.000319984	Ankrd13a/Dgkd/Scrib/Fmr1/Abca2/Vac14/Cd2ap/Ap2a1/Pip5k1c/Nsf/Mtmr2/Tnk2/Ubqln2/Atxn2/Tbc1d5/Synj1/Rin3/Rnf216/Wasl/Pacsin1/Plk2/Smap1/Arc/Sh3gl3	24
BP	GO:0051251	positive regulation of lymphocyte activation	49/2090	367/28891	2.50241e-05	0.000443106	0.000326044	Smarcc1/Tnfrsf4/Nsd2/Smarca4/Cbfb/Arid1a/Stat6/Il12rb1/Tgfb1/Dock8/Pbrm1/Paxip1/Smarcc2/Phf10/Ap1g1/Actl6a/Ap3b1/Cdkn1a/Abl1/Slamf1/Arid1b/Tyk2/Selenok/Lyst/Ambra1/Ulbp1/Mlh1/Rhoh/Smarcd1/Kat5/Card11/Zfp335/Il15ra/Tnip2/Smarca2/Vav3/Tnfrsf14/Sox12/Fadd/Klhl25/Gpam/Ticam1/Shld2/Wnt10b/Bcl6/Ticam2/Ager/Efnb1/Cd1d1	49
BP	GO:0048536	spleen development	13/2090	48/28891	2.50343e-05	0.000443106	0.000326044	Nfkb2/Kmt2a/Rbm15/Ctc1/Abl1/Pkn1/Bcl2l11/Jarid2/Rc3h2/Tet2/Lipa/Myb/Fadd	13
BP	GO:0006611	protein export from nucleus	16/2090	69/28891	2.56229e-05	0.000452155	0.000332702	Ywhae/Tpr/Rangap1/Xpo6/Ahcyl1/Uhmk1/Tgfb1/Xpo7/Nup214/Mdm2/Hdac3/Emd/Rbm22/Desi1/Prkaca/Pkd1	16
BP	GO:1901605	alpha-amino acid metabolic process	31/2090	194/28891	2.59196e-05	0.000456013	0.000335541	Shmt2/Cad/Atf4/Gart/Mthfd1/Pfas/Txnrd1/Htt/Got1/Psph/Gfpt1/Mri1/Icmt/Bckdk/Apc/Mtrr/Bcat2/Spr/Gclm/Enoph1/Ctps2/Gpt2/Dglucy/Thap4/Slc39a8/Apip/Gls2/Aldh4a1/Gcat/Atp7a/Slc7a11	31
BP	GO:0031113	regulation of microtubule polymerization	14/2090	55/28891	2.65608e-05	0.000465572	0.000342575	Fkbp4/Numa1/Git1/Clip1/Dctn1/Tbcd/Abl1/Apc/Psrc1/Camsap1/Slain1/Gba2/Eml2/Fes	14
BP	GO:0051653	spindle localization	15/2090	62/28891	2.66267e-05	0.000465572	0.000342575	Myh9/Actr2/Dync1h1/Numa1/Htt/Clasp1/Hdac3/Dctn1/Llgl1/Spry1/Kat5/Spire1/Wasl/Gpsm1/Spry2	15
BP	GO:0006473	protein acetylation	22/2090	116/28891	2.67021e-05	0.000465572	0.000342575	Mybbp1a/Noc2l/Baz1b/Smarca4/Bag6/Tgfb1/Nat10/Msl2/Kat6a/Actl6a/Kat2a/Kansl3/Crebbp/Dip2b/Nfyc/Kat14/Por/Kat5/Naa60/Kat8/Hdac8/Hint2	22
BP	GO:0110154	RNA decapping	8/2090	19/28891	2.71102e-05	0.000471148	0.000346678	Eif4enif1/Edc4/Patl1/Dcp1a/Nudt3/Dcps/Lsm1/Nudt16	8
BP	GO:0032200	telomere organization	26/2090	150/28891	2.72691e-05	0.000471148	0.000346678	Hnrnpc/Mapk1/Parp1/Ctnnb1/Exosc10/Upf1/Nat10/Yy1/Uchl5/Actl6a/Ylpm1/Ctc1/Mcrs1/Ino80/Xrn1/Brca2/Slx4/Smg6/Rad51d/Ercc4/Nsmce2/Xrcc3/Shld2/Zfp365/Hdac8/Rad51c	26
BP	GO:0120161	regulation of cold-induced thermogenesis	26/2090	150/28891	2.72691e-05	0.000471148	0.000346678	Atf4/Ogt/Dync1h1/Smarca4/Stat6/Notch1/Lnpep/Fabp5/Hdac3/Rheb/Cnot3/Ehmt1/Mfn2/Hsf1/Apc/Gnas/Rb1/Flcn/Elovl6/Tfe3/Dhrs7b/Oma1/Alms1/Prkab2/Wnt10b/Il18r1	26
BP	GO:2000060	positive regulation of ubiquitin-dependent protein catabolic process	21/2090	108/28891	2.73445e-05	0.000471148	0.000346678	Akt1/Ubqln1/Csnk1d/Ptk2b/Usp5/Traf7/Rbx1/Bcap31/Mdm2/Axin1/Gsk3a/Herpud1/Gabarap/Pten/Rnf14/Ubqln2/Rchy1/Agtpbp1/Csnk1e/Plk2/Rnf144a	21
BP	GO:0070507	regulation of microtubule cytoskeleton organization	27/2090	159/28891	2.81567e-05	0.000483715	0.000355925	Fkbp4/Tpr/Dync1h1/Numa1/Mark2/Clasp1/Git1/Clip1/Dctn1/Tbcd/Abl1/Map1s/Apc/Specc1l/Pkd1/Hdgfl3/Psrc1/Camsap1/Chmp5/Slain1/Gba2/Chmp6/Eml2/Hdac6/Wdr47/Phldb1/Fes	27
BP	GO:0032527	protein exit from endoplasmic reticulum	12/2090	42/28891	2.84344e-05	0.000487054	0.000358382	Sar1a/Sec13/Bcap31/Ube2j1/Sec16a/Aup1/Herpud1/Os9/Sec61b/Derl2/Selenos/Erlec1	12
BP	GO:0033157	regulation of intracellular protein transport	35/2090	232/28891	2.85778e-05	0.000488078	0.000359135	Lcp1/Ywhae/Trim28/Flna/Tpr/Rangap1/Mapk1/Ogt/Uhmk1/Tgfb1/Sar1a/Mapk14/Bcap31/Mdm2/Ube2j1/Pcnt/Nucb1/Ice1/Hdac3/Gdi1/Emd/Rbm22/Gsk3a/Os9/Ei24/Prkaca/Derl2/Ufm1/Akap1/Atp13a2/Zc3h12a/Bbc3/Erlec1/Rab23/Cep131	35
BP	GO:0072175	epithelial tube formation	28/2090	168/28891	2.87141e-05	0.000488977	0.000359797	Brd2/Mthfd1/Mthfd1l/Ctnnb1/Arid1a/Vasp/Tgfb1/Gatad2a/Scrib/Med12/Kdm2b/Ski/Kat2a/Abl1/Mib1/Tsc2/Prkaca/Specc1l/Ipmk/Celsr1/Sufu/Ift52/Arhgap35/Luzp1/Mks1/Rab23/Rarg/Vangl2	28
BP	GO:0071482	cellular response to light stimulus	22/2090	117/28891	3.06652e-05	0.000520684	0.000383127	Noc2l/Parp1/Yy1/Cdc25a/Rbx1/Mapk14/Cdkn1a/Ino80/Ei24/Trp53inp1/Agap3/Crebbp/Rnf168/Mettl3/Polk/Ercc4/Usp28/Mapk11/Xpc/Xpa/Trpm1/Opn3	22
BP	GO:0030968	endoplasmic reticulum unfolded protein response	16/2090	70/28891	3.10023e-05	0.000524882	0.000386216	Atf4/Eif2a/Dnajc3/Ptpn2/Herpud1/Os9/Atf6b/Derl2/Atf6/Selenos/Bfar/Ermp1/Creb3/Erlec1/Parp6/Stc2	16
BP	GO:0060996	dendritic spine development	24/2090	134/28891	3.15475e-05	0.000532569	0.000391873	Actr2/Pak2/Dbnl/Pbrm1/Fmr1/Git1/Prmt3/Llph/Arid1b/Mfn2/Tsc2/Pten/Crebbp/Nr3c1/Asap1/Tiam1/Pdlim5/Hdac6/Spire1/Wasl/Plk2/Zfp365/Afdn/Arc	24
BP	GO:0016331	morphogenesis of embryonic epithelium	30/2090	187/28891	3.2142e-05	0.000541042	0.000398107	Brd2/Mthfd1/Mthfd1l/Ctnnb1/Arid1a/Vasp/Htt/Tgfb1/Gatad2a/Scrib/Med12/Kdm2b/Ski/Kat2a/Grsf1/Abl1/Mib1/Tsc2/Prkaca/Specc1l/Ipmk/Celsr1/Sufu/Ift52/Arhgap35/Luzp1/Mks1/Rab23/Rarg/Vangl2	30
BP	GO:0019083	viral transcription	14/2090	56/28891	3.3072e-05	0.000555097	0.000408449	Psmc3/Smarca4/Notch1/Brd4/Rrp1b/Trim27/Trim8/Hexim1/Ccnt2/Snw1/Zfp639/Rsf1/Ctdp1/Mon1b	14
BP	GO:0032271	regulation of protein polymerization	32/2090	206/28891	3.4429e-05	0.000576218	0.000423989	Fkbp4/Capzb/Sptan1/Cotl1/Numa1/Vasp/Dbnl/Mtpn/Ptk2b/Evl/Hax1/Git1/Clip1/Dctn1/Ssh2/Tbcd/Abl1/Capn1/Rasa1/Dlg1/Apc/Ambra1/Psrc1/Camsap1/Slain1/Gba2/Eml2/Kank3/Cdc42ep3/Cttn/Fes/Pfn2	32
BP	GO:0050867	positive regulation of cell activation	57/2090	454/28891	3.49125e-05	0.000582639	0.000428715	Flna/Nr4a3/Smarcc1/Tnfrsf4/Nsd2/Smarca4/Cbfb/Arid1a/Stat6/Il12rb1/Tgfb1/Dock8/Jund/Pbrm1/Paxip1/Smarcc2/Phf10/Rps6ka1/Ap1g1/Actl6a/Ctsc/Ap3b1/Cdkn1a/Abl1/Slamf1/Arid1b/Tyk2/Selenok/Lyst/Ambra1/Ulbp1/Mlh1/Rhoh/Smarcd1/Kat5/Card11/Zfp335/Il15ra/Crlf2/Tnip2/Smarca2/Vav3/Tnfrsf14/Sox12/Myb/Fadd/Klhl25/Gpam/Ticam1/Shld2/Wnt10b/Bcl6/Ticam2/Ager/Efnb1/Gata1/Cd1d1	57
BP	GO:0046822	regulation of nucleocytoplasmic transport	24/2090	135/28891	3.57706e-05	0.000595259	0.000438001	Ywhae/Trim28/Flna/Tpr/Rangap1/Wnk1/Mapk1/Khdrbs1/Uhmk1/Tgfb1/Nup214/Ppp1r12a/Mapk14/Mdm2/Hdac3/Emd/Rbm22/Ei24/Prkaca/Ufm1/Akap1/Zc3h12a/Rab23/Rbm4	24
BP	GO:0001894	tissue homeostasis	40/2090	283/28891	3.73416e-05	0.000617883	0.000454647	Csk/Ctnnb1/Notch1/Rab7/Acaca/Kmt2a/Ptk2b/Atf1/Srf/Xiap/Stk39/Ncdn/Gnas/Tcirg1/Rb1/Ptger4/Tmem64/Mtf1/Def8/Slc28a2/Mfsd2a/Poc1b/Dram2/Nfix/Lipa/Slc39a8/Ank/Whrn/Csf1/Col11a2/Idua/Mks1/Nphp4/Gpr137/Gpr55/Bbs2/Trp53inp2/Rab3d/Apbb2/Gata1	40
BP	GO:0060249	anatomical structure homeostasis	40/2090	283/28891	3.73416e-05	0.000617883	0.000454647	Csk/Ctnnb1/Notch1/Rab7/Acaca/Kmt2a/Ptk2b/Atf1/Srf/Xiap/Stk39/Ncdn/Gnas/Tcirg1/Rb1/Ptger4/Tmem64/Mtf1/Def8/Slc28a2/Mfsd2a/Poc1b/Dram2/Nfix/Lipa/Slc39a8/Ank/Whrn/Csf1/Col11a2/Idua/Mks1/Nphp4/Gpr137/Gpr55/Bbs2/Trp53inp2/Rab3d/Apbb2/Gata1	40
BP	GO:0001824	blastocyst development	27/2090	162/28891	3.95408e-05	0.000652422	0.000480062	Hcfc1/Psmc3/Smarca4/Psmc4/Brd4/Cul3/Pbrm1/Ints1/Rrp7a/Dad1/Bcor/Srf/Actl6a/Bysl/Suv39h1/Ctr9/Cnot3/Uspl1/Asf1b/Mfn2/Rbbp8/Brca2/Gins4/Ube2a/Tgfbr3/Cmtm3/Pelo	27
BP	GO:0006887	exocytosis	51/2090	395/28891	4.25175e-05	0.000699562	0.000514748	Myh9/Rap1b/Rab8b/Atp2a2/Lat/Sdf4/Nr4a3/Bcl2l1/Txlna/Rab10/Notch1/Rab7/Pdcd6ip/Scrib/Fmr1/Rab8a/Ap1g1/Clasp1/Git1/Rab11b/Git2/Unc13d/Orai1/Myo5a/Pip5k1c/Nsf/Exoc6/Mia3/Llgl1/Prkaca/Stxbp5/Synj1/Pik3c2a/Atp13a2/Stxbp3/Snap47/Bcr/Exoc8/Rab9/Vps18/Rab11fip1/Slc4a8/Grik5/Rab11fip2/Sdc1/Rab3d/Slc18a2/Gata1/Doc2g/Fes/Pfn2	51
BP	GO:1900182	positive regulation of protein localization to nucleus	20/2090	103/28891	4.2961e-05	0.000704875	0.000518657	Hnrnpm/Trim28/Flna/Tpr/Mapk1/Parp1/Ogt/Akt1/Tgfb1/Mapk14/Hdac3/Cd2ap/Rbm22/Mcrs1/Trim8/Mepce/Crebbp/Tyk2/Zc3h12a/Tesk1	20
BP	GO:0106106	cold-induced thermogenesis	26/2090	154/28891	4.34797e-05	0.000711386	0.000523449	Atf4/Ogt/Dync1h1/Smarca4/Stat6/Notch1/Lnpep/Fabp5/Hdac3/Rheb/Cnot3/Ehmt1/Mfn2/Hsf1/Apc/Gnas/Rb1/Flcn/Elovl6/Tfe3/Dhrs7b/Oma1/Alms1/Prkab2/Wnt10b/Il18r1	26
BP	GO:0000018	regulation of DNA recombination	24/2090	137/28891	4.57729e-05	0.000744734	0.000547986	Actr2/Parp1/Ndfip1/Nsd2/Stat6/Trrap/Msh6/Tgfb1/Ubqln4/Paxip1/Actl6a/Mms19/Abl1/Was/Mlh1/Kat5/Epc1/Vps72/Helq/Ing3/H1f0/Shld2/Zfp365/Bcl6	24
BP	GO:0042157	lipoprotein metabolic process	24/2090	137/28891	4.57729e-05	0.000744734	0.000547986	Nmt1/Zdhhc3/Pigt/Pigq/Zdhhc6/Golga7/Gpaa1/Wipi2/Dbi/Pigs/Selenok/Zdhhc8/Zdhhc7/Pign/Abhd12/Zdhhc16/Lipa/Pigl/Zdhhc24/Pigyl/Zdhhc1/Wdr45/Pgap3/Lcat	24
BP	GO:0060541	respiratory system development	39/2090	276/28891	4.66684e-05	0.000757194	0.000557155	Ppp1ca/Mapk1/Bag6/Ctnnb1/Numa1/Notch1/Tgfb1/Map2k2/Heg1/Ncor2/Srf/Foxp4/Mapk8ip3/Ap3b1/Ski/Stk40/Man1a2/Jmjd6/Man2a1/Smad2/Aimp2/Spry1/Fkrp/Rc3h2/Celsr1/Hikeshi/Hs6st1/Lipa/Zfp157/Disp1/Atp7a/Rarg/Itga3/Selenon/Slc7a11/Vangl2/Spry2/Fgfrl1/Thrb	39
BP	GO:0006890	retrograde vesicle-mediated transport, Golgi to endoplasmic reticulum	12/2090	44/28891	4.73598e-05	0.000766284	0.000563843	Htt/Copz1/Pitpnb/Ergic1/Gbf1/Kif1c/Sec22b/Rab6a/Scyl1/Golph3l/Cog7/Bet1l	12
BP	GO:0046488	phosphatidylinositol metabolic process	25/2090	146/28891	4.75465e-05	0.00076718	0.000564502	Pi4ka/Pigt/Pigq/Vac14/Pip4k2b/Gpaa1/Pip5k1c/Pigs/Ttc7/Pten/Mtmr2/Synj1/Mtmr9/Pign/Ttc7b/Pik3c2a/Pitpnc1/Inpp4a/Dgke/Inpp5e/Pip4p2/Pigl/Pigyl/Sla2/Pgap3	25
BP	GO:0006487	protein N-linked glycosylation	15/2090	65/28891	4.8292e-05	0.000774928	0.000570204	Mlec/Mogs/Gfpt1/Dad1/Ube2j1/Alg10b/Krtcap2/Tmem258/Ext2/Dhdds/Alg5/Pmm1/Entpd5/Mgat5/Slc39a8	15
BP	GO:0070897	transcription preinitiation complex assembly	15/2090	65/28891	4.8292e-05	0.000774928	0.000570204	Cand1/Taf1/Med1/Med24/Med15/Med25/Gtf2a1/Atf7ip/Taf4/Brf1/Med16/Taf3/Med20/Med26/Wnt10b	15
BP	GO:0045017	glycerolipid biosynthetic process	33/2090	219/28891	4.87934e-05	0.000780828	0.000574545	Dgkz/Dgkd/Pi4ka/Fabp5/Pigt/Pigq/Vac14/Plscr1/Pip4k2b/Gpaa1/Pip5k1c/Pigs/Ttc7/Tamm41/Kat5/Pign/Cnep1r1/Ttc7b/Hdhd5/Pik3c2a/Dhrs7b/Mfsd2a/Pcyt1a/Inpp4a/Dgke/Ptdss2/Gpam/Dgkq/Pigl/Pigyl/Sla2/Pgap3/Lcat	33
BP	GO:1901991	negative regulation of mitotic cell cycle phase transition	29/2090	182/28891	4.90142e-05	0.000782218	0.000575568	Tpr/Rad21/Ccng1/Dgkz/Zc3h12d/Rbm38/Ik/Zwint/Clspn/Mdm2/Rbl1/Cdkn1a/Cdc73/Rbbp8/Dlg1/Uimc1/Pten/Apc/Rb1/Zfp655/Haspin/Rbl2/Zfyve19/Fbxo31/Xrcc3/Abraxas1/Fbxo7/Mbd4/E2f7	29
BP	GO:0030219	megakaryocyte differentiation	13/2090	51/28891	5.03796e-05	0.000801818	0.00058999	Flna/Wasf2/Med1/Zfpm1/Srf/Rbm15/Nbeal2/Rcor1/Pithd1/Sh2b3/Uba5/Myb/Gata1	13
BP	GO:0032984	protein-containing complex disassembly	36/2090	248/28891	5.09042e-05	0.000807967	0.000594514	Atp2a2/Arhgef1/Capzb/Wnk1/Sptan1/Smarcc1/Smarca4/Arid1a/Mtpn/Ubqln1/Htt/Upf1/Ubqln4/Evl/Smarcc2/Scaf4/Clasp1/Map1s/Nsf/Apc/Tfip11/Pym1/Specc1l/Smarcd1/Hdgfl3/Camsap1/Chmp5/Synj1/Chmp6/Tecpr1/Hdac6/Clec16a/Fyco1/Wdr47/Dyrk3/Sh3gl3	36
BP	GO:0017015	regulation of transforming growth factor beta receptor signaling pathway	24/2090	138/28891	5.16597e-05	0.000817735	0.000601701	Ogt/Tgfb1/Usp15/Got1/Snx1/Ski/Axin1/Snw1/Sinhcaf/Trim33/Smad2/Crebbp/Spry1/Arid4a/Arid4b/Flcn/Gipc1/Tgfbr3/Zfp703/Itga3/Wfikkn2/Vasn/Spry2/Rasl11b	24
BP	GO:1905168	positive regulation of double-strand break repair via homologous recombination	11/2090	38/28891	5.34452e-05	0.000841343	0.000619073	Actr2/Parp1/Trrap/Actl6a/Mms19/Was/Kat5/Epc1/Vps72/Helq/Ing3	11
BP	GO:0045806	negative regulation of endocytosis	16/2090	73/28891	5.35959e-05	0.000841343	0.000619073	Csk/Tgfb1/Ankrd13a/Fmr1/Abca2/Plscr1/Tsc2/Pten/Mtmr2/Pacsin2/Ubqln2/Atxn2/Rin3/Pacsin1/Pip4p2/Sh3gl3	16
BP	GO:0030970	retrograde protein transport, ER to cytosol	9/2090	26/28891	5.37272e-05	0.000841343	0.000619073	Bcap31/Ube2j1/Aup1/Herpud1/Os9/Sec61b/Derl2/Selenos/Erlec1	9
BP	GO:1903513	endoplasmic reticulum to cytosol transport	9/2090	26/28891	5.37272e-05	0.000841343	0.000619073	Bcap31/Ube2j1/Aup1/Herpud1/Os9/Sec61b/Derl2/Selenos/Erlec1	9
BP	GO:0044839	cell cycle G2/M phase transition	26/2090	156/28891	5.44731e-05	0.000850741	0.000625988	Rcc2/Lmnb1/Rad21/Ccng1/Calm3/Brd4/Paxip1/Cdc25a/Clspn/Cdkn1a/Arpp19/Ctc1/Cdc7/Rbbp8/Uimc1/Kat14/Ube2a/Zfyve19/Mastl/Abraxas1/Cdk10/Mbd4/Bach1/Wnt10b/Dyrk3/Rad51c	26
BP	GO:0007034	vacuolar transport	27/2090	165/28891	5.49241e-05	0.000855483	0.000629477	Ndfip1/Rab7/Igf2r/Ap1g1/Ap3b1/Snx27/Leprotl1/Lyst/Vps13d/Mvb12a/Chmp5/Ndfip2/Tgfbrap1/Mon1b/Vta1/Vps8/Atp13a2/Chmp6/Clec16a/Leprot/Hgsnat/Lipa/Stx8/Vps18/Ccdc91/Ehd3/Snx16	27
BP	GO:0008630	intrinsic apoptotic signaling pathway in response to DNA damage	21/2090	113/28891	5.50696e-05	0.000855483	0.000629477	Bag6/Cd44/Bcl2l1/Msh6/Hipk1/Aen/Plscr1/Cdkn1a/Tnfrsf1b/Ei24/Snw1/Ikbke/Brca2/Bcl2l11/Mlh1/Rad9a/Phlda3/Usp28/Bbc3/Mbd4/Xpa	21
BP	GO:0035264	multicellular organism growth	34/2090	230/28891	5.61031e-05	0.000869227	0.00063959	Rpl29/Ezr/Heg1/Pcnt/Notch2/Hdac3/Suv39h1/Kat2a/Rai1/Ctc1/Stk40/Gpd2/Icmt/Hsf1/Dlg1/Fto/Gnas/Brca2/Zfx/Rc3h2/Spr/Atxn2/Sp2/Nek1/Ankrd26/Mfsd2a/Nfix/Alms1/Gpam/Csf1/Xpa/Rarg/Bbs2/Stc2	34
BP	GO:0035308	negative regulation of protein dephosphorylation	10/2090	32/28891	5.64913e-05	0.000872925	0.000642311	Ywhae/Ptpa/Ikbkb/Mprip/Arpp19/Ppp1r9b/Akap1/Mgat5/Mastl/Cry2	10
BP	GO:2000401	regulation of lymphocyte migration	15/2090	66/28891	5.83513e-05	0.000895034	0.000658579	Msn/Wnk1/Akt1/Dock8/Ptk2b/Stk10/Crkl/Abl1/Stk39/Crk/Mia3/Selenok/Tnfrsf14/Wasl/Fadd	15
BP	GO:0006029	proteoglycan metabolic process	18/2090	89/28891	5.83818e-05	0.000895034	0.000658579	Ctnnb1/Extl3/Cant1/Chpf/Ext2/Slc35b2/Ndst1/Hs6st1/Ids/Hgsnat/Slc35d1/Glce/Idua/Gpc1/Pxylp1/Arsb/Chst14/Vangl2	18
BP	GO:0042147	retrograde transport, endosome to Golgi	18/2090	89/28891	5.83818e-05	0.000895034	0.000658579	Rab7/Trim27/Snx1/Dctn1/Trappc10/Gbf1/Vps26b/Spag9/Ube2o/Rab6a/Gga1/Stx16/Tbc1d5/Heatr5a/Eipr1/Rab9/Ehd3/Bet1l	18
BP	GO:0006091	generation of precursor metabolites and energy	59/2090	484/28891	6.00434e-05	0.00091805	0.000675515	Mybbp1a/Shmt2/Phb2/Ppp1ca/Mdh2/Ide/Sdha/Ogt/Ogdh/Nr4a3/Akt1/Uqcrfs1/Dlst/Cox8a/Foxk2/Suclg1/Ppif/Cox7a2l/Prps2/Gfpt1/Cox5b/Cox5a/Pnpt1/Ireb2/Git1/Dlat/Foxk1/Sdhc/Stk40/Gsk3a/Adpgk/Myo5a/Mtfr1/Mfn2/Rptor/Gnas/Prkaca/Sdhaf2/Eno1b/Uqcr11/Fkrp/Gaa/Por/Ndufa3/Flcn/Acadm/Thap11/Tmem135/Nipsnap2/Mtfr2/Prkag2/Lipa/Ndor1/Sik2/Abcd1/Ppp1r3e/Atp7a/Aldh1l2/Opn3	59
BP	GO:0045066	regulatory T cell differentiation	12/2090	45/28891	6.03546e-05	0.00091805	0.000675515	Cd44/Tgfb1/Ctla4/Kat2a/Drosha/Ambra1/Sh2b3/Kat5/Sox12/Klhl25/Bcl6/Fut7	12
BP	GO:0045815	transcription initiation-coupled chromatin remodeling	12/2090	45/28891	6.03546e-05	0.00091805	0.000675515	Noc2l/Smarca4/Kmt2a/Phf2/Nr3c1/Smarcd1/Setd1a/Vps72/Znhit1/Usp21/N6amt1/Lcor	12
BP	GO:0009416	response to light stimulus	44/2090	329/28891	6.07088e-05	0.000918654	0.000675959	Noc2l/Ppp1ca/Parp1/Sdf4/Akt1/Htt/Msh6/Mta1/Yy1/Kmt2a/Nptn/Cdc25a/Rbx1/Mapk14/Cdkn1a/Ino80/Dynlrb1/Ei24/Ric8a/Cep250/Trp53inp1/Agap3/Crebbp/Brca2/Rnf168/Mettl3/Ube2a/Polk/Ercc8/Ercc4/Usp28/Fech/Crtc1/Mapk11/Xpc/Primpol/Idua/Cry2/Xpa/Rbm4/Slc7a11/Hrh2/Trpm1/Opn3	44
BP	GO:0016032	viral process	44/2090	329/28891	6.07088e-05	0.000918654	0.000675959	Ptbp1/Eif3b/Pcbp1/Larp1/Trim28/Hcfc1/Pcbp2/Eif3f/Psmc3/Smarca4/Bcl2l1/Eif3g/Notch1/Rab7/Brd4/Rrp1b/Pdcd6ip/Trim27/Fmr1/Igf2r/Plscr1/Jpt2/Trim8/Hexim1/Ccnt2/Snw1/Ccnk/Zfp639/Rsf1/Crebbp/Ctdp1/Bcl2l11/Zdhhc8/Mvb12a/Chmp5/Mon1b/Chmp6/Tpcn1/Zc3h12a/Vps18/Mvb12b/Creb3/Rab43/Dynlt1a	44
BP	GO:0051123	RNA polymerase II preinitiation complex assembly	14/2090	59/28891	6.17168e-05	0.000931494	0.000685407	Cand1/Taf1/Med1/Med24/Med15/Med25/Gtf2a1/Atf7ip/Taf4/Med16/Taf3/Med20/Med26/Wnt10b	14
BP	GO:0002696	positive regulation of leukocyte activation	54/2090	432/28891	6.2257e-05	0.000937225	0.000689624	Nr4a3/Smarcc1/Tnfrsf4/Nsd2/Smarca4/Cbfb/Arid1a/Stat6/Il12rb1/Tgfb1/Dock8/Jund/Pbrm1/Paxip1/Smarcc2/Phf10/Ap1g1/Actl6a/Ctsc/Ap3b1/Cdkn1a/Abl1/Slamf1/Arid1b/Tyk2/Selenok/Lyst/Ambra1/Ulbp1/Mlh1/Rhoh/Smarcd1/Kat5/Card11/Zfp335/Il15ra/Crlf2/Tnip2/Smarca2/Vav3/Tnfrsf14/Sox12/Fadd/Klhl25/Gpam/Ticam1/Shld2/Wnt10b/Bcl6/Ticam2/Ager/Efnb1/Gata1/Cd1d1	54
BP	GO:1901800	positive regulation of proteasomal protein catabolic process	21/2090	114/28891	6.29603e-05	0.000945375	0.000695621	Bag6/Akt1/Ubqln1/Eif2a/Csnk1d/Usp5/Fmr1/Rbx1/Bcap31/Mdm2/Rnf40/Axin1/Gsk3a/Herpud1/Gabarap/Rnf14/Ubqln2/Rchy1/Csnk1e/Plk2/Rnf144a	21
BP	GO:0006378	mRNA polyadenylation	8/2090	21/28891	6.40234e-05	0.000956422	0.000703749	Papola/Sympk/Ahcyl1/Cpsf1/Nudt21/Wdr33/Cdc73/Leo1	8
BP	GO:0045292	mRNA cis splicing, via spliceosome	8/2090	21/28891	6.40234e-05	0.000956422	0.000703749	Sf3a1/Cactin/Rbm22/Cwc15/Prpf39/Wbp4/Dcps/Prpf40b	8
BP	GO:0043401	steroid hormone mediated signaling pathway	22/2090	123/28891	6.76177e-05	0.00100754	0.000741362	Fkbp4/Phb2/Dnaja1/Mapk1/Parp1/Ddx17/Smarca4/Arid1a/Safb2/Med1/Carm1/Ncor2/Abhd2/Ufm1/Nr3c1/Rnf14/Zdhhc7/Uba5/Ufsp2/Vps18/Cry2/Peg13	22
BP	GO:0031507	heterochromatin formation	18/2090	90/28891	6.80965e-05	0.00101209	0.000744711	Dnmt1/Trim28/Tpr/Suz12/Lmnb1/Smarca4/Suv39h1/Phf2/Ehmt1/Atf7ip/Lmnb2/Jarid2/Rb1/Bahd1/Phf8/Bend3/H1f0/Bcl6	18
BP	GO:1903844	regulation of cellular response to transforming growth factor beta stimulus	24/2090	141/28891	7.36068e-05	0.00109121	0.000802929	Ogt/Tgfb1/Usp15/Got1/Snx1/Ski/Axin1/Snw1/Sinhcaf/Trim33/Smad2/Crebbp/Spry1/Arid4a/Arid4b/Flcn/Gipc1/Tgfbr3/Zfp703/Itga3/Wfikkn2/Vasn/Spry2/Rasl11b	24
BP	GO:0000070	mitotic sister chromatid segregation	28/2090	177/28891	7.46616e-05	0.00110405	0.000812374	Flna/Baz1b/Tpr/Rad21/Nudc/Numa1/Cul3/Ik/Zwint/Rrs1/Stag1/Clasp1/Ino80/Kifc1/Apc/Kif2a/Mzt1/Rb1/Golga2/Psrc1/Kat5/Chmp5/Haspin/Chmp6/Nsmce2/Xrcc3/Abraxas1/Map10	28
BP	GO:0048144	fibroblast proliferation	25/2090	150/28891	7.50803e-05	0.00110743	0.000814867	Rpl29/Dazap1/Tgfb1/Kmt2a/Rrn3/Ecd/Cks1b/Ski/Kat2a/Emd/Cdkn1a/Ctc1/Abl1/Cdc73/Med25/Rasa1/Trp53inp1/Icmt/Tsc2/E2f8/Sp2/Smarca2/Myb/Lig4/Ager	25
BP	GO:0046685	response to arsenic-containing substance	9/2090	27/28891	7.54297e-05	0.00110797	0.000815261	Slc38a2/Nefh/Ppif/Hsf1/Nr3c1/Alad/Zc3h12a/As3mt/Rbm4	9
BP	GO:0034101	erythrocyte homeostasis	27/2090	168/28891	7.5496e-05	0.00110797	0.000815261	Ptbp3/Smarca4/Med1/Ptpn2/Mapk14/Zfpm1/Srf/Ireb2/Axin1/Jmjd6/Rcor1/Exoc6/Foxo3/Sh2b3/Arid4a/Rb1/Setd1a/Uba5/Fech/Tgfbr3/Myb/Smap1/Dyrk3/Bcl6/Acvr2a/P4htm/Gata1	27
BP	GO:0009156	ribonucleoside monophosphate biosynthetic process	10/2090	33/28891	7.5818e-05	0.00110991	0.000816687	Cad/Paics/Gart/Atic/Pfas/Aprt/Prps2/Impdh1/Rfk/Uck1	10
BP	GO:0070828	heterochromatin organization	19/2090	99/28891	7.7998e-05	0.00113897	0.000838068	Dnmt1/Trim28/Tpr/Suz12/Lmnb1/Smarca4/Suv39h1/Phf2/Setd7/Ehmt1/Atf7ip/Lmnb2/Jarid2/Rb1/Bahd1/Phf8/Bend3/H1f0/Bcl6	19
BP	GO:0034620	cellular response to unfolded protein	17/2090	83/28891	7.8614e-05	0.0011451	0.00084258	Atf4/Eif2a/Dnajc3/Ptpn2/Herpud1/Os9/Atf6b/Hsf1/Derl2/Atf6/Selenos/Bfar/Ermp1/Creb3/Erlec1/Parp6/Stc2	17
BP	GO:0006364	rRNA processing	32/2090	215/28891	8.00966e-05	0.00116379	0.000856335	Rpl10a/Rps16/Rpl27/Ddx17/Bop1/Exosc10/Rrp1b/Wbp11/Nol9/Nat10/Dis3/Usp36/Nol6/Ddx54/Rrs1/Pelp1/Rrp7a/Wdr46/Bysl/Suv39h1/Dhx37/Drosha/Wdr55/Riok1/Ngdn/Pop4/Frg1/Eri3/Tsr3/Mettl5/Rpusd1/Fdxacb1	32
BP	GO:0051028	mRNA transport	21/2090	116/28891	8.182e-05	0.00118588	0.00087259	Nup210/Tpr/Khsrp/Wnk1/Eif4a3/Slbp/Nup188/Htt/Nup93/Pom121/Rbm8a/Sec13/Nup214/Fmr1/Nup133/Rbm15b/Casc3/Hsf1/Zc3h11a/Zc3h3/Arc	21
BP	GO:1903828	negative regulation of protein localization	35/2090	244/28891	8.20437e-05	0.00118618	0.00087281	Rangap1/Dnaja1/Wnk1/Csk/Ogt/Ndfip1/Akt1/Bcl2l1/Tgfb1/Ankrd13a/Ube2j1/Hdac3/Gdi1/Madd/Erp29/Os9/Ei24/Mark3/Rptor/Derl2/Ufm1/Akap1/Wwp2/Flcn/Ndfip2/Leprot/Rab11fip3/Inpp5e/Plk2/Rab11fip1/Erlec1/Idua/Rab23/Dclk1/Trp53inp2	35
BP	GO:0032387	negative regulation of intracellular transport	15/2090	68/28891	8.40998e-05	0.00121291	0.000892475	Tpr/Rangap1/Ogt/Sar1a/Abca2/Ube2j1/Hdac3/Gdi1/Os9/Ei24/Derl2/Ufm1/Akap1/Erlec1/Rab23	15
BP	GO:2001233	regulation of apoptotic signaling pathway	54/2090	437/28891	8.45072e-05	0.00121578	0.000894589	Ybx3/Sfpq/Atf4/Noc2l/Ppp1ca/Ghitm/Maz/Dnaja1/Parp1/Tnfrsf4/Pak2/Ctnnb1/Cd44/Akt1/Bcl2l1/Ubqln1/Htt/Usp15/Traf7/Rrn3/Ppif/Ptpn2/Bcap31/Mdm2/Uri1/Ctsc/Plscr1/Madd/Erp29/Herpud1/Ei24/Mfn2/Pten/Bcl2l11/Eno1b/Rb1/Selenos/Gclm/Flcn/Rad9a/Pdcd7/Cep63/Nr4a2/Fbxo7/Caap1/Bbc3/Fadd/Creb3/Meis3/Gsdme/Wwox/Ctsl/Cttn/Gata1	54
BP	GO:0051259	protein complex oligomerization	37/2090	264/28891	8.56516e-05	0.00122922	0.000904475	Shmt2/Vasp/Farsb/Pdcd6ip/Acaca/Nudt21/Evl/Letm1/Pnpt1/Jmjd6/Lrrc8c/Pkd1/Fkrp/Alad/Golga2/Bend3/Card11/Kctd10/Lrrc8d/Osbpl2/Kcna3/Micu1/Crtc3/Kctd3/Crtc1/Hgsnat/Zc3h12a/Bbc3/Cbr4/Ehd3/Apip/Wdcp/Trim65/Zdhhc1/Tmem120b/Arc/Trpm1	37
BP	GO:0045589	regulation of regulatory T cell differentiation	11/2090	40/28891	8.97583e-05	0.00128259	0.00094375	Cd44/Tgfb1/Ctla4/Kat2a/Drosha/Ambra1/Sh2b3/Kat5/Sox12/Klhl25/Bcl6	11
BP	GO:0034333	adherens junction assembly	6/2090	12/28891	8.98099e-05	0.00128259	0.00094375	Pak2/Ctnnb1/Hipk1/Tbcd/Zfp703/Vcl	6
BP	GO:0006903	vesicle targeting	14/2090	61/28891	9.11403e-05	0.00129842	0.000955394	Sar1a/Cul3/Scrib/Sec16a/Clasp1/Trappc10/Pdcd6/Gbf1/Exoc6/Arfgap2/Trappc6b/Trappc9/Exoc8/Stard3nl	14
BP	GO:0010824	regulation of centrosome duplication	12/2090	47/28891	9.57797e-05	0.00136119	0.00100158	Pdcd6ip/Nat10/Kat2a/Kifc1/Nubp1/Fbxw5/Chmp5/Cep76/Xrcc3/Alms1/Plk2/Cep131	12
BP	GO:0035303	regulation of dephosphorylation	22/2090	126/28891	9.80348e-05	0.00138986	0.00102268	Ptbp1/Ywhae/Hsp90b1/Calm3/Htt/Ptpa/Tgfb1/Ppp1r12a/Ikbkb/Uri1/Ppp2r5d/Mprip/Arpp19/Ppp1r9b/Mtmr2/Ambra1/Akap1/Mtmr9/Cnep1r1/Mgat5/Mastl/Cry2	22
BP	GO:0071901	negative regulation of protein serine/threonine kinase activity	20/2090	109/28891	9.86388e-05	0.00139503	0.00102649	Prkar1a/Dnaja1/Hipk3/Heg1/Cdkn1a/Prkar2a/Fem1a/Hexim1/Abl1/Tsc2/Pten/Apc/Spry1/Rb1/Dusp7/Fbxo7/Cdkn2c/Tesk1/Prkar2b/Spry2	20
BP	GO:0040015	negative regulation of multicellular organism growth	7/2090	17/28891	0.000104435	0.00147344	0.00108418	Rai1/Gnas/Atxn2/Ankrd26/Alms1/Bbs2/Stc2	7
BP	GO:0030518	intracellular steroid hormone receptor signaling pathway	21/2090	118/28891	0.000105537	0.0014854	0.00109298	Fkbp4/Phb2/Dnaja1/Mapk1/Parp1/Ddx17/Smarca4/Arid1a/Safb2/Med1/Carm1/Ncor2/Ufm1/Nr3c1/Rnf14/Zdhhc7/Uba5/Ufsp2/Vps18/Cry2/Peg13	21
BP	GO:0042594	response to starvation	31/2090	209/28891	0.000109519	0.00153774	0.00113149	Mybbp1a/Larp1/Cad/Atf4/Mapk1/Eif2a/Foxk2/Ehmt2/Stk24/Suv39h1/Eif4ebp1/Foxk1/Cdkn1a/Wipi2/Gabarap/Tsc2/Rptor/Foxo3/Kat5/Flcn/Acadm/Tbc1d5/Xpr1/Pik3c2a/Clec16a/Impact/Mfsd2a/Dapl1/Zc3h12a/Wdr45/Gpr155	31
BP	GO:0009615	response to virus	49/2090	389/28891	0.000110096	0.00154163	0.00113435	G3bp1/Trim28/C1qbp/Phb2/Pcbp2/Ddx17/Tagap/Il12rb1/Bcl2l1/Ubqln1/Rrp1b/Tgfb1/Trim27/Erbin/Fmr1/Mapk14/Uri1/Aup1/Plscr1/Unc13d/Trim8/Pou2f2/Ikbke/Gbf1/Clpb/Crebbp/Selenok/Lyst/Akap1/Xpr1/Armc5/Rnf216/Dus2/Trim41/Ube2w/Zc3h12a/Mapk11/Fadd/Creb3/Gpam/Ticam1/Usp20/Trim65/Gsdme/Zcchc3/Zdhhc1/Ticam2/Nlrx1/Sertad3	49
BP	GO:0007052	mitotic spindle organization	22/2090	127/28891	0.000110587	0.00154163	0.00113435	Flna/Tpr/Nudc/Dync1h1/Numa1/Ptpa/Stag1/Pcnt/Clasp1/Dctn1/Map1s/Kifc1/Kif2a/Pkd1/Mzt1/Golga2/Psrc1/Chmp5/Chmp6/Abraxas1/Plk2/Map10	22
BP	GO:0048534	hematopoietic or lymphoid organ development	22/2090	127/28891	0.000110587	0.00154163	0.00113435	Nfkb2/Mapk1/Ctnnb1/Tgfb1/Kmt2a/Map2k2/Bcl11b/Srf/Rbm15/Crkl/Ctc1/Abl1/Pkn1/Apc/Bcl2l11/Jarid2/Rc3h2/Tet2/Lrp5/Lipa/Myb/Fadd	22
BP	GO:0046777	protein autophosphorylation	34/2090	238/28891	0.000111543	0.00155124	0.00114143	Cad/Trim28/Wnk1/Csk/Pak2/Brd4/Uhmk1/Ptk2b/Map2k2/Clk1/Stk24/Irak1/Mapk14/Vrk1/Mark2/Stk10/Ppp2r5d/Abl1/Stk39/Prkd2/Peak1/Mark3/Map3k11/Lmtk2/Prkaca/Clk4/Atp13a2/Mknk1/Impact/Bcr/Sik2/Tesk1/Txk/Fes	34
BP	GO:0090317	negative regulation of intracellular protein transport	12/2090	48/28891	0.000119361	0.00165211	0.00121565	Rangap1/Ogt/Ube2j1/Hdac3/Gdi1/Os9/Ei24/Derl2/Ufm1/Akap1/Erlec1/Rab23	12
BP	GO:0098927	vesicle-mediated transport between endosomal compartments	12/2090	48/28891	0.000119361	0.00165211	0.00121565	Msn/Flna/Mapk1/Ezr/Rab7/Map2k2/Dnajc13/Mtmr2/Lmtk2/Rab11fip3/Stx8/Snx16	12
BP	GO:0010976	positive regulation of neuron projection development	34/2090	239/28891	0.000121164	0.0016731	0.00123109	Ptbp1/Actr2/Flna/Rapgef1/Dbnl/Ptk2b/Rrn3/Sf3a2/Nptn/Stk24/Ikbkb/Atf1/Mark2/Ppp2r5d/Clip1/Ap2a1/Abl1/Mfn2/Tsc2/Enc1/Prkci/Tiam1/Arhgap35/Mob2/Crtc1/Pacsin1/Afdn/P3h1/Arsb/Itga3/Amigo1/Dynlt1a/Serpinf1/Fes	34
BP	GO:0051310	metaphase chromosome alignment	18/2090	94/28891	0.000122739	0.00169085	0.00124415	Rcc2/Nudc/Dync1h1/Numa1/Cul3/Rrs1/Map1s/Kifc1/Apc/Brca2/Mlh1/Rb1/Psrc1/Kat5/Chmp5/Chmp6/Abraxas1/Ttl	18
BP	GO:0070972	protein localization to endoplasmic reticulum	16/2090	78/28891	0.000123969	0.00170377	0.00125366	Bag6/Akt1/Rab10/Spcs2/Bcap31/Sec16a/Herpud1/Os9/Sec61b/Gbf1/Mia3/Fkrp/Srprb/Sec61a2/Srp54a/Grik5	16
BP	GO:0072332	intrinsic apoptotic signaling pathway by p53 class mediator	17/2090	86/28891	0.000124857	0.00171194	0.00125967	Mybbp1a/Bag6/Cd44/Usp15/Hipk1/Rrn3/Mdm2/Aen/Cdkn1a/Snw1/Brca2/Cep63/Phlda3/Usp28/Bbc3/Wwox/Perp	17
BP	GO:1990845	adaptive thermogenesis	27/2090	173/28891	0.000125473	0.00171636	0.00126293	Atf4/Ogt/Dync1h1/Smarca4/Stat6/Notch1/Lnpep/Fabp5/Hdac3/Rheb/Cnot3/Ehmt1/Mfn2/Hsf1/Apc/Gnas/Rb1/Flcn/Elovl6/Tfe3/Dhrs7b/Oma1/Lipa/Alms1/Prkab2/Wnt10b/Il18r1	27
BP	GO:0051091	positive regulation of DNA-binding transcription factor activity	37/2090	269/28891	0.000126694	0.00172902	0.00127224	Phb2/Smarca4/Ctnnb1/Akt1/Pprc1/Mtpn/Psma6/Tgfb1/Trim27/Ikbkb/Irak1/Carm1/Srf/Ifrd1/Trim8/Prkd2/Ikbke/Hsf1/Pten/Crebbp/Card11/Prkci/Thap11/Trappc9/Rnf41/Hdac5/Lrp5/Tgfbr3/Crtc3/Crtc1/Ticam1/Rhebl1/Lpar5/Wnt10b/Il18r1/Ticam2/Ager	37
BP	GO:0007020	microtubule nucleation	10/2090	35/28891	0.000131596	0.00179173	0.00131838	Csnk1d/Clasp1/Git1/Nin/Dctn1/Tubgcp6/Mzt1/Golga2/Slain1/Eml2	10
BP	GO:0031929	TOR signaling	28/2090	183/28891	0.000134617	0.0018286	0.00134551	Larp1/Eif4ebp2/Akt1/Cul3/Sec13/Rps6ka1/Rbx1/Hdac3/Eif4ebp1/Pdcd6/Rheb/Gsk3a/Icmt/Tti1/Tsc2/Rptor/Prkaca/Flcn/Card11/Akt1s1/Clec16a/Ube2w/Lipa/Rhebl1/Dgkq/Dyrk3/Gpr137/Gpr155	28
BP	GO:0042098	T cell proliferation	37/2090	270/28891	0.000136771	0.00185355	0.00136387	Msn/Prkar1a/Fkbp1a/Ndfip1/Tnfrsf4/Ctnnb1/Cd44/Il12rb1/Cblb/Tgfb1/Zc3h12d/Dock8/Scrib/Ctla4/Abl1/Slamf1/Tnfrsf1b/Ncstn/Tsc2/Dlg1/Pten/Tyk2/Selenok/Rc3h2/Card11/Armc5/Znhit1/Lmbr1l/Tnfrsf14/Lipa/Fadd/Gpam/Tnfrsf21/Bcl6/Ager/Efnb1/Cd1d1	37
BP	GO:0016575	histone deacetylation	9/2090	29/28891	0.000141222	0.00190944	0.00140499	Mta2/Tgfb1/Mta1/Tbl1x/Hdac3/Suv39h1/Hdac6/Hdac5/Hdac8	9
BP	GO:0046605	regulation of centrosome cycle	13/2090	56/28891	0.000142321	0.00191985	0.00141265	Pdcd6ip/Nat10/Ccnl1/Kat2a/Kifc1/Nubp1/Fbxw5/Chmp5/Cep76/Xrcc3/Alms1/Plk2/Cep131	13
BP	GO:0000086	G2/M transition of mitotic cell cycle	23/2090	138/28891	0.000142865	0.00192275	0.00141479	Rcc2/Lmnb1/Rad21/Ccng1/Calm3/Brd4/Cdc25a/Clspn/Cdkn1a/Arpp19/Ctc1/Cdc7/Rbbp8/Uimc1/Kat14/Ube2a/Zfyve19/Mastl/Abraxas1/Mbd4/Bach1/Wnt10b/Rad51c	23
BP	GO:0030218	erythrocyte differentiation	25/2090	156/28891	0.000143296	0.00192412	0.0014158	Ptbp3/Smarca4/Med1/Ptpn2/Mapk14/Zfpm1/Srf/Jmjd6/Rcor1/Exoc6/Foxo3/Sh2b3/Arid4a/Rb1/Setd1a/Uba5/Fech/Tgfbr3/Myb/Smap1/Dyrk3/Bcl6/Acvr2a/P4htm/Gata1	25
BP	GO:1905897	regulation of response to endoplasmic reticulum stress	16/2090	79/28891	0.000145131	0.00194281	0.00142954	Bag6/Bcl2l1/Ubqln1/Eif2a/Usp19/Ubxn1/Ptpn2/Bcap31/Erp29/Herpud1/Atf6b/Atf6/Selenos/Ubqln2/Bfar/Creb3	16
BP	GO:0006986	response to unfolded protein	20/2090	112/28891	0.000145353	0.00194281	0.00142954	Atf4/Eif2a/Dnajc3/Ptpn2/Ube2j2/Herpud1/Os9/Atf6b/Mfn2/Hsf1/Derl2/Atf6/Selenos/Bfar/Ermp1/Creb3/Erlec1/Parp6/Chac1/Stc2	20
BP	GO:0010799	regulation of peptidyl-threonine phosphorylation	12/2090	49/28891	0.00014775	0.00197034	0.0014498	Eif4g1/Mapk1/Ogt/Tgfb1/Ppp2r5d/Ube2k/Axin1/Gsk3a/Rptor/Prkag2/Dgkq/Spry2	12
BP	GO:0071675	regulation of mononuclear cell migration	22/2090	130/28891	0.000157222	0.00209188	0.00153924	Msn/C1qbp/Wnk1/Mapk1/Akt1/Tgfb1/Dock8/Ptk2b/Stk10/Crkl/Abl1/Slamf1/Stk39/Crk/Mia3/Selenok/Tnfrsf14/Wasl/Fadd/Creb3/Csf1/Ager	22
BP	GO:0032868	response to insulin	36/2090	262/28891	0.000158371	0.00210237	0.00154696	Cad/Ide/Mapk1/Parp1/Ogt/Smarcc1/Eif4ebp2/Akt1/Rab10/Hadha/Rab8a/Ptpn2/Mapk14/Scap/Eif4ebp1/Pip4k2b/Zfp592/Gsk3a/Myo5a/Mfn2/Tsc2/Pten/Apc/Rb1/Kbtbd2/Zdhhc7/Prkci/Ankrd26/Ncoa1/Stxbp3/Gpam/Sik2/Cry2/Slc2a8/Rbm4/Fut7	36
BP	GO:0031062	positive regulation of histone methylation	7/2090	18/28891	0.000160228	0.0021222	0.00156155	Hcfc1/Ogt/Mcrs1/Kansl1/Kansl3/Nelfa/Kat8	7
BP	GO:0032204	regulation of telomere maintenance	18/2090	96/28891	0.000162321	0.00214507	0.00157837	Hnrnpc/Mapk1/Parp1/Ctnnb1/Exosc10/Upf1/Nat10/Yy1/Uchl5/Actl6a/Ylpm1/Ctc1/Mcrs1/Ino80/Slx4/Smg6/Ercc4/Hdac8	18
BP	GO:0030324	lung development	34/2090	243/28891	0.000167562	0.00220932	0.00162565	Ppp1ca/Mapk1/Bag6/Ctnnb1/Numa1/Notch1/Tgfb1/Map2k2/Heg1/Ncor2/Srf/Foxp4/Mapk8ip3/Ap3b1/Stk40/Man1a2/Jmjd6/Man2a1/Smad2/Aimp2/Spry1/Rc3h2/Celsr1/Hikeshi/Hs6st1/Lipa/Zfp157/Atp7a/Itga3/Selenon/Slc7a11/Vangl2/Spry2/Thrb	34
BP	GO:0051494	negative regulation of cytoskeleton organization	27/2090	176/28891	0.000168039	0.00221062	0.00162661	Fkbp4/Capzb/Sptan1/Pak2/Mtpn/Wasf2/Evl/Coro1b/Clasp1/Ssh2/Kat2a/Tbcd/Was/Capn1/Mfn2/Kifc1/Apc/Nubp1/Specc1l/Hdgfl3/Camsap1/Eml2/Hdac6/Gmfg/Wdr47/Kank3/Pfn2	27
BP	GO:0048545	response to steroid hormone	35/2090	253/28891	0.000169666	0.002227	0.00163866	Atp1a1/Fkbp4/Phb2/Dnaja1/Mapk1/Parp1/Ddx17/Smarca4/Arid1a/Tgfb1/Tbl1x/Safb2/Med1/Carm1/Ncor2/Uri1/Eif4ebp1/Gsk3a/Stk39/Abhd2/Ufm1/Nr3c1/Rnf14/Fkrp/Por/Zdhhc7/Uba5/Ufsp2/Pdcd7/Ncoa1/Vps18/Cry2/Hdac8/Peg13/Lcat	35
BP	GO:0051293	establishment of spindle localization	13/2090	57/28891	0.000172274	0.00225617	0.00166012	Myh9/Dync1h1/Numa1/Htt/Clasp1/Hdac3/Dctn1/Llgl1/Spry1/Kat5/Spire1/Gpsm1/Spry2	13
BP	GO:0031503	protein-containing complex localization	34/2090	244/28891	0.000181408	0.00237047	0.00174423	Rcc2/Sfpq/Fkbp4/Lmnb1/Ogt/Ezr/Ap2b1/Ipo9/Scrib/Nptn/Zdhhc3/Rab8a/Fxr1/Git1/Vac14/Ralgapb/Ap2a1/Pip5k1c/Lmnb2/Dlg1/Mzt1/Sh3glb2/Pura/Synj1/Ift52/Rnf216/Snap47/Neto2/Klhl21/Wasl/Pacsin1/Zfp365/Cep131/Arc	34
BP	GO:0061572	actin filament bundle organization	27/2090	177/28891	0.000184847	0.00241003	0.00177333	Lcp1/Myh9/Hsp90b1/Flna/Actn4/Limd2/Ezr/Pak2/Wasf2/Cul3/Ptk2b/Evl/Actn1/Srf/Coro1b/Clasp1/Abl1/Was/Zyx/Ptger4/Limk1/Spire1/Alms1/Rflnb/Tesk1/Kank3/Pfn2	27
BP	GO:1903312	negative regulation of mRNA metabolic process	18/2090	97/28891	0.000186006	0.00241974	0.00178048	Hnrnpab/Ptbp1/Hnrnpa0/Larp1/Hnrnpc/Thrap3/U2af2/C1qbp/Eif4enif1/Ptbp3/Rnps1/Rbm38/Fmr1/Angel2/Ikbke/Srsf4/Dhx34/Pcbp4	18
BP	GO:0006476	protein deacetylation	14/2090	65/28891	0.000187969	0.00243984	0.00179527	Flna/Mta2/Tgfb1/Mta1/Tbl1x/Ncor2/Hdac3/Suv39h1/Kat2a/Kat14/Ndst1/Hdac6/Hdac5/Hdac8	14
BP	GO:1904292	regulation of ERAD pathway	8/2090	24/28891	0.000190193	0.00246323	0.00181248	Bag6/Ubqln1/Eif2a/Usp19/Ubxn1/Bcap31/Herpud1/Ubqln2	8
BP	GO:0051225	spindle assembly	21/2090	123/28891	0.000193349	0.00248766	0.00183046	Flna/Tpr/Dync1h1/Numa1/Csnk1d/Stag1/Clasp1/Hdac3/Ino80/Kifc1/Pten/Kif2a/Mlh1/Tubgcp6/Mzt1/Golga2/Chmp5/Chmp6/Abraxas1/Ccdc69/Map10	21
BP	GO:0034728	nucleosome organization	17/2090	89/28891	0.000193357	0.00248766	0.00183046	Mcm2/Brd2/Smarcc1/Smarca4/Arid1a/Dnajc9/Smarcc2/Kat6a/Chaf1a/Asf1b/Rsf1/Smarcd1/Naa60/Smarca2/H1f0/Tspyl4/H3f3c	17
BP	GO:0040014	regulation of multicellular organism growth	17/2090	89/28891	0.000193357	0.00248766	0.00183046	Ezr/Hdac3/Suv39h1/Rai1/Hsf1/Dlg1/Fto/Gnas/Spr/Atxn2/Ankrd26/Mfsd2a/Alms1/Gpam/Csf1/Bbs2/Stc2	17
BP	GO:0010569	regulation of double-strand break repair via homologous recombination	15/2090	73/28891	0.000195762	0.00251306	0.00184915	Actr2/Parp1/Trrap/Ubqln4/Actl6a/Mms19/Abl1/Was/Kat5/Epc1/Vps72/Helq/Ing3/Shld2/Zfp365	15
BP	GO:0140238	presynaptic endocytosis	16/2090	81/28891	0.000197063	0.00252422	0.00185736	Canx/Ctbp1/Bcl2l1/Ap2b1/Diaph1/Scrib/Pip5k1c/Synj1/Btbd9/Vamp4/Dennd1a/Pacsin1/Fcho2/Necap1/Dgkq/Sh3gl3	16
BP	GO:0031623	receptor internalization	24/2090	150/28891	0.000197567	0.00252514	0.00185804	Ezr/Ap2b1/Ankrd13a/Scrib/Fmr1/Snx1/Vac14/Ap2a1/Pip5k1c/Nsf/Mtmr2/Ubqln2/Atxn2/Sh3glb2/Tbc1d5/Synj1/Calcrl/Rin3/Rnf216/Pacsin1/Plk2/Cd9/Arc/Grk4	24
BP	GO:0048538	thymus development	13/2090	58/28891	0.000207481	0.00264606	0.00194701	Mapk1/Ctnnb1/Map2k2/Bcl11b/Srf/Crkl/Ctc1/Abl1/Apc/Bcl2l11/Jarid2/Myb/Fadd	13
BP	GO:0050000	chromosome localization	20/2090	115/28891	0.000210554	0.0026794	0.00197154	Rcc2/Actr2/Nudc/Dync1h1/Numa1/Cul3/Rrs1/Map1s/Kifc1/Apc/Brca2/Mlh1/Rb1/Psrc1/Kat5/Chmp5/Cep63/Chmp6/Abraxas1/Ttl	20
BP	GO:0030323	respiratory tube development	34/2090	246/28891	0.000212213	0.00269464	0.00198276	Ppp1ca/Mapk1/Bag6/Ctnnb1/Numa1/Notch1/Tgfb1/Map2k2/Heg1/Ncor2/Srf/Foxp4/Mapk8ip3/Ap3b1/Stk40/Man1a2/Jmjd6/Man2a1/Smad2/Aimp2/Spry1/Rc3h2/Celsr1/Hikeshi/Hs6st1/Lipa/Zfp157/Atp7a/Itga3/Selenon/Slc7a11/Vangl2/Spry2/Thrb	34
BP	GO:0008033	tRNA processing	21/2090	124/28891	0.00021714	0.00275122	0.00202439	Akt1/Nat10/Trnt1/Rtraf/Thumpd1/Pnpt1/Grsf1/Tarbp1/Pop4/Ctu2/Wdr6/Dalrd3/Dus2/Trit1/Tsen34/Elp6/Elp4/Rpp25l/Ctu1/Trmt10b/Dtwd2	21
BP	GO:0007093	mitotic cell cycle checkpoint signaling	24/2090	151/28891	0.00021905	0.00276942	0.00203778	Tpr/Ccng1/Dgkz/Trrap/Rbm38/Ik/Zwint/Clspn/Mdm2/Cdkn1a/Mtbp/Rbbp8/Uimc1/Apc/Rad9a/Haspin/Zfyve19/Fbxo31/Xrcc3/Abraxas1/Mbd4/Xpc/Rpl24/Setmar	24
BP	GO:0036465	synaptic vesicle recycling	17/2090	90/28891	0.000222527	0.00280731	0.00206566	Canx/Ctbp1/Bcl2l1/Ap2b1/Diaph1/Scrib/Git1/Git2/Pip5k1c/Synj1/Btbd9/Vamp4/Dennd1a/Pacsin1/Fcho2/Dgkq/Sh3gl3	17
BP	GO:0009117	nucleotide metabolic process	58/2090	497/28891	0.000223353	0.00281164	0.00206885	Fasn/Cad/Paics/Gart/Mdh2/Atic/Mthfd1/Pfas/Mapk1/Parp1/Sdha/Txnrd1/Ogdh/Dlst/Bcl2l1/Nadk/Kcnab2/Aprt/Tgfb1/Acaca/Suclg1/Prps2/Impdh1/Dlat/Atp6v1b2/Sdhc/Gpd2/Prpsap1/Nudt3/Rptor/Eno1b/Pank4/Rfk/Hsd17b4/Tbpl1/Bend3/Ndufa3/Flcn/Dnph1/Uck1/Coasy/Ctps2/Slc52a2/Entpd5/Gcdh/Adcy3/Lipa/Gpam/Adal/Abcd1/Rab23/Nudt16/Cox11/Atp7a/Acss1/Ehhadh/Aldh1l2/Acot6	58
BP	GO:0045022	early endosome to late endosome transport	11/2090	44/28891	0.000227669	0.00285981	0.00210429	Msn/Flna/Mapk1/Ezr/Rab7/Map2k2/Dnajc13/Mtmr2/Lmtk2/Stx8/Snx16	11
BP	GO:0051851	modulation by host of symbiont process	16/2090	82/28891	0.000228598	0.00286532	0.00210835	Fasn/Psmc3/Smarca4/Brd4/Rrp1b/Pi4ka/Fmr1/Igf2r/Snw1/Ccnk/Zfp639/Ctdp1/Sap30bp/Zdhhc8/Zc3h12a/Rab9	16
BP	GO:0032922	circadian regulation of gene expression	15/2090	74/28891	0.000229303	0.00286801	0.00211032	Mybbp1a/Huwe1/Atf4/Ppp1ca/Ogt/Mycbp2/Mta1/Csnk1d/Kmt2a/Gfpt1/Hdac3/Rai1/Csnk1e/Cry2/Rbm4	15
BP	GO:0022604	regulation of cell morphogenesis	37/2090	277/28891	0.000230011	0.00287071	0.00211231	Myh9/Arhgdia/Msn/Actr2/Capzb/Ezr/Cd44/Dbnl/Coro1c/Fmnl1/Diaph1/Ptk2b/Cdc42se1/Mark2/Coro1b/Rhog/Anxa7/Mfn2/Crk/Spag9/Dlg1/Pten/Slc23a2/Camsap1/Tiam1/Arhgap35/Fbxo31/Plxna1/Mfsd2a/Parp6/Zmym6/Afdn/Dnmbp/Cdc42ep3/Ss18l1/Arc/Fes	37
BP	GO:0140014	mitotic nuclear division	36/2090	267/28891	0.000230719	0.00287341	0.0021143	Flna/Phb2/Baz1b/Tpr/Rad21/Nudc/Numa1/Tgfb1/Cul3/Ik/Zwint/Rrs1/Stag1/Clasp1/Ino80/Mtbp/Kifc1/Apc/Reep3/Kif2a/Ctdp1/Mzt1/Rb1/Fbxw5/Golga2/Psrc1/Kat5/Chmp5/Haspin/Chmp6/Nsmce2/Xrcc3/Abraxas1/Nfix/Rpl24/Map10	36
BP	GO:0030258	lipid modification	30/2090	208/28891	0.000231342	0.00287504	0.0021155	Nr4a3/Akt1/Dgkz/B4galnt1/Hadha/Dgkd/Mapk14/Sgpp1/Hadhb/Dbi/Pten/Mtmr2/Slc35c1/Tysnd1/Hsd17b4/Por/Acadm/Synj1/Mtmr9/Gba2/Mfsd2a/Gcdh/Dgke/Inpp5e/Klhl25/Pip4p2/Abcd1/Dgkq/Ehhadh/Aldh1l2	30
BP	GO:0045639	positive regulation of myeloid cell differentiation	20/2090	116/28891	0.000237373	0.00294373	0.00216604	Tgfb1/Med1/Hax1/Mapk14/Notch2/Hsf1/Rcor1/Rptor/Foxo3/Pithd1/Gnas/Rb1/Tmem64/Smap1/Fadd/Csf1/Acvr2a/Ctnnbip1/Gata1/Fes	20
BP	GO:0097320	plasma membrane tubulation	7/2090	19/28891	0.00023788	0.00294376	0.00216606	Atp10a/Bin2/Pacsin2/Asap1/Micall1/Wasl/Pacsin1	7
BP	GO:0006892	post-Golgi vesicle-mediated transport	18/2090	99/28891	0.000242582	0.00298928	0.00219956	Csk/Rab10/Ap1g1/Sec16a/Golga7/Myo5a/Gbf1/Nsf/Exoc6/Llgl1/Gga1/Vamp4/Golph3l/Exoc8/Slc30a6/Ccdc91/Ehd3/Bbs2	18
BP	GO:0038202	TORC1 signaling	18/2090	99/28891	0.000242582	0.00298928	0.00219956	Larp1/Akt1/Cul3/Sec13/Rbx1/Rheb/Tsc2/Rptor/Prkaca/Flcn/Card11/Akt1s1/Clec16a/Ube2w/Dgkq/Dyrk3/Gpr137/Gpr155	18
BP	GO:0045582	positive regulation of T cell differentiation	21/2090	125/28891	0.000243466	0.00299386	0.00220293	Smarcc1/Smarca4/Cbfb/Arid1a/Tgfb1/Pbrm1/Smarcc2/Phf10/Actl6a/Ap3b1/Arid1b/Ambra1/Rhoh/Smarcd1/Kat5/Smarca2/Sox12/Klhl25/Wnt10b/Bcl6/Cd1d1	21
BP	GO:0002520	immune system development	35/2090	258/28891	0.000248497	0.0030493	0.00224372	Nfkb2/Mapk1/Ndfip1/Nsd2/Ctnnb1/Stat6/Cblb/Msh6/Tgfb1/Yy1/Kmt2a/Paxip1/Map2k2/Bcl11b/Srf/Rbm15/Crkl/Ctc1/Abl1/Pkn1/Apc/Bcl2l11/Jarid2/Mlh1/Rnf168/Rc3h2/Tet2/Lrp5/Lipa/Myb/Fadd/Shld2/Lig4/Rnf8/Bcl6	35
BP	GO:0022408	negative regulation of cell-cell adhesion	30/2090	209/28891	0.000251759	0.00308287	0.00226842	Prkar1a/Wnk1/Ndfip1/Cbfb/Cd44/Akt1/Notch1/Cblb/Tgfb1/Zc3h12d/Scrib/Ptpn2/Akna/Ctla4/Abl1/Tsc2/Mia3/Dlg1/Pten/Sh2b3/Specc1l/Rc3h2/Pag1/Dapl1/Tnfrsf14/Zc3h12a/Cd9/Tnfrsf21/Zfp703/Bcl6	30
BP	GO:0032436	positive regulation of proteasomal ubiquitin-dependent protein catabolic process	17/2090	91/28891	0.000255451	0.00312153	0.00229687	Akt1/Ubqln1/Csnk1d/Usp5/Rbx1/Bcap31/Mdm2/Axin1/Gsk3a/Herpud1/Gabarap/Rnf14/Ubqln2/Rchy1/Csnk1e/Plk2/Rnf144a	17
BP	GO:0010457	centriole-centriole cohesion	6/2090	14/28891	0.000257204	0.00313133	0.00230408	Ctnnb1/Nin/Dctn1/Cep250/Cep44/Cntln	6
BP	GO:0001704	formation of primary germ layer	19/2090	108/28891	0.000257325	0.00313133	0.00230408	Myh9/Prkar1a/Txnrd1/Nr4a3/Ctnnb1/Arid1a/Htt/Srf/Dusp5/Axin1/Ctr9/Cdc73/Smad2/Prkaca/Ext2/Leo1/Armc5/Pofut2/Ahdc1	19
BP	GO:0048732	gland development	57/2090	489/28891	0.000259371	0.00314965	0.00231756	Fasn/Msn/Fkbp4/Phb2/Mapk1/Smarca4/Ctnnb1/Cd44/Stat6/Notch1/Aprt/Tgfb1/Cul3/Scrib/Map2k2/Bcl11b/Med1/Rps6ka1/Igf2r/Srf/Notch2/Crkl/Ctc1/Orai1/Abl1/Capn1/Man2a1/Icmt/Ptcd2/Smad2/Pten/Apc/Brca2/Nr3c1/Bcl2l11/Jarid2/Pkd1/E2f8/Acadm/Tet2/Armc5/Arhgap35/Lrp5/Plxna1/Tgfbr3/Btrc/Lipa/Myb/Fadd/E2f7/Csf1/Zfp157/Zfp703/Rarg/Hrh2/Serpinf1/Eaf2	57
BP	GO:0006312	mitotic recombination	8/2090	25/28891	0.000262032	0.0031688	0.00233165	Brca2/Mlh1/Rad51d/Ercc4/Nsmce2/Xrcc3/Rad52/Rad51c	8
BP	GO:0035024	negative regulation of Rho protein signal transduction	8/2090	25/28891	0.000262032	0.0031688	0.00233165	Cul3/Heg1/Flcn/Kctd10/Arhgap35/Scai/Bcl6/Itga3	8
BP	GO:0002090	regulation of receptor internalization	16/2090	83/28891	0.000264415	0.00319101	0.00234799	Ankrd13a/Scrib/Fmr1/Vac14/Pip5k1c/Nsf/Mtmr2/Ubqln2/Atxn2/Tbc1d5/Synj1/Rin3/Rnf216/Pacsin1/Plk2/Arc	16
BP	GO:0000959	mitochondrial RNA metabolic process	12/2090	52/28891	0.000269944	0.00325102	0.00239215	Trnt1/Tfam/Pnpt1/Grsf1/Foxo3/Polrmt/Sars2/Aars2/Thap11/Trit1/Wars2/Mterf1a	12
BP	GO:0098884	postsynaptic neurotransmitter receptor internalization	10/2090	38/28891	0.000277528	0.00332863	0.00244926	Ap2b1/Scrib/Vac14/Ap2a1/Pip5k1c/Sh3glb2/Synj1/Rnf216/Pacsin1/Arc	10
BP	GO:0140239	postsynaptic endocytosis	10/2090	38/28891	0.000277528	0.00332863	0.00244926	Ap2b1/Scrib/Vac14/Ap2a1/Pip5k1c/Sh3glb2/Synj1/Rnf216/Pacsin1/Arc	10
BP	GO:0000245	spliceosomal complex assembly	11/2090	45/28891	0.0002818	0.00336604	0.00247678	Celf2/Puf60/Sf3a1/Sf3a2/Prpf39/Isy1/Crnkl1/Slu7/Gemin2/Ptbp2/Gcfc2	11
BP	GO:0034661	ncRNA catabolic process	11/2090	45/28891	0.0002818	0.00336604	0.00247678	Snd1/Exosc10/Dis3/Trnt1/Pnpt1/Xrn1/Zcchc7/Zc3h12a/Dis3l/Nudt16/Pelo	11
BP	GO:0048638	regulation of developmental growth	49/2090	405/28891	0.000289076	0.00344591	0.00253555	Ybx3/Mapk1/Ezr/Mycbp2/Akt1/Dbnl/Notch1/Yy1/Mapk14/Srf/Hdac3/Ifrd1/Suv39h1/Gdi1/Rai1/Cdkn1a/Abl1/Gsk3a/Hsf1/Spag9/Dlg1/Pten/Apc/Dip2b/Fto/Ctdp1/Gnas/Nr3c1/Bcl2l11/Jarid2/Slc23a2/Ptger4/Spr/Atxn2/Ankrd26/Zfyve27/Limk1/Mfsd2a/Tgfbr3/Mapk11/Alms1/Gpam/Csf1/Ttl/Afdn/Bbs2/Stc2/Colq/Cttn	49
BP	GO:0051303	establishment of chromosome localization	19/2090	109/28891	0.000290826	0.0034597	0.0025457	Rcc2/Nudc/Dync1h1/Numa1/Cul3/Rrs1/Map1s/Kifc1/Apc/Brca2/Mlh1/Rb1/Psrc1/Kat5/Chmp5/Cep63/Chmp6/Abraxas1/Ttl	19
BP	GO:0060562	epithelial tube morphogenesis	48/2090	395/28891	0.000299653	0.00355747	0.00261764	Phb2/Ppp1ca/Brd2/Mthfd1/Mthfd1l/Ctnnb1/Cd44/Arid1a/Vasp/Notch1/Nfatc1/Tgfb1/Gatad2a/Scrib/Med12/Med1/Kdm2b/Srf/Notch2/Rbm15/Ski/Kat2a/Abl1/Mib1/Tsc2/Dlg1/Prkaca/Nr3c1/Spry1/Specc1l/Pkd1/Ipmk/Celsr1/Sufu/Ift52/Arhgap35/Hdac5/Lrp5/Luzp1/Btrc/Csf1/Mks1/Rab23/Rarg/Ctnnbip1/Vangl2/Spry2/Fkbpl	48
BP	GO:0046631	alpha-beta T cell activation	31/2090	221/28891	0.000303284	0.00359327	0.00264398	Ndfip1/Cbfb/Cd44/Stat6/Cblb/Tgfb1/Kmt2a/Ly9/Bcl11b/Ap3b1/Abl1/Tyk2/Tcirg1/Ptger4/Rc3h2/Card11/Armc5/Dapl1/Tnfrsf14/Zc3h12a/Myb/Klhl25/Cracr2a/Txk/Bcl6/Atp7a/Ctsl/Il18r1/Fut7/Ager/Cd1d1	31
BP	GO:0030330	DNA damage response, signal transduction by p53 class mediator	14/2090	68/28891	0.000309625	0.00366028	0.00269329	Cd44/Rbm38/Paxip1/Usp10/Mdm2/Cdkn1a/Foxo3/Brca2/Smyd2/Kat5/Znhit1/Pcbp4/E2f7/Dyrk3	14
BP	GO:0090092	regulation of transmembrane receptor protein serine/threonine kinase signaling pathway	35/2090	261/28891	0.000310193	0.00366028	0.00269329	Parp1/Ogt/Numa1/Notch1/Tgfb1/Usp15/Nup93/Got1/Snx1/Notch2/Ski/Axin1/Abl1/Snw1/Sinhcaf/Trim33/Smad2/Crebbp/Ube2o/Spry1/Arid4a/Arid4b/Flcn/Gipc1/Tgfbr3/Zfp703/Zc3h3/Gpr155/Pelo/Itga3/Wfikkn2/Acvr2a/Vasn/Spry2/Rasl11b	35
BP	GO:0090100	positive regulation of transmembrane receptor protein serine/threonine kinase signaling pathway	18/2090	101/28891	0.000313598	0.00369299	0.00271736	Parp1/Numa1/Notch1/Tgfb1/Nup93/Got1/Notch2/Axin1/Snw1/Smad2/Crebbp/Ube2o/Flcn/Gipc1/Tgfbr3/Zc3h3/Pelo/Acvr2a	18
BP	GO:0050821	protein stabilization	29/2090	202/28891	0.000315327	0.00370588	0.00272684	Hcfc1/Flna/Phb2/Atp1b3/Bag6/Ipo9/Usp36/Usp19/Ncln/Tbl1x/Ncor2/Sec16a/Mapk8ip3/Wiz/Golga7/Atf7ip/Pten/Mtrr/Pex6/Mtmr9/Cep63/Tnip2/Cog7/Taf9b/Wnt10b/P3h1/Otud3/Apbb2/Pfn2	29
BP	GO:0051017	actin filament bundle assembly	26/2090	174/28891	0.00033543	0.00393423	0.00289486	Lcp1/Myh9/Hsp90b1/Flna/Actn4/Limd2/Ezr/Pak2/Wasf2/Cul3/Ptk2b/Evl/Actn1/Srf/Coro1b/Clasp1/Abl1/Was/Zyx/Ptger4/Limk1/Spire1/Alms1/Tesk1/Kank3/Pfn2	26
BP	GO:0043112	receptor metabolic process	16/2090	85/28891	0.00035082	0.00410649	0.00302162	Ide/Tgfb1/Scrib/Abca2/Ptpn2/Git1/Rab11b/Capn1/Nsf/Mtmr2/Lmtk2/Pex6/Mvb12a/Chmp5/Ehd3/Tbc1d16	16
BP	GO:0044380	protein localization to cytoskeleton	13/2090	61/28891	0.000352324	0.00411585	0.0030285	Numa1/Htt/Diaph1/Csnk1d/Ppp1r9b/Abl1/Cep250/Apc/Cep63/Klhl21/Rab11fip3/Ccdc14/Cep131	13
BP	GO:0039529	RIG-I signaling pathway	8/2090	26/28891	0.000354612	0.00412608	0.00303603	C1qbp/Phb2/Ankrd17/Usp15/Pum1/Clpb/Zcchc3/Nlrx1	8
BP	GO:1904357	negative regulation of telomere maintenance via telomere lengthening	8/2090	26/28891	0.000354612	0.00412608	0.00303603	Hnrnpc/Parp1/Exosc10/Nat10/Ctc1/Mcrs1/Slx4/Ercc4	8
BP	GO:0001510	RNA methylation	15/2090	77/28891	0.000361318	0.00417912	0.00307506	Akt1/Rbm15/Rbm15b/Zc3h13/Mepce/Tarbp1/Pcif1/Wdr6/Dalrd3/Mettl3/Mettl5/Cbll1/Trmt10b/Fdxacb1/Cmtr1	15
BP	GO:0035601	protein deacylation	15/2090	77/28891	0.000361318	0.00417912	0.00307506	Flna/Mta2/Tgfb1/Mta1/Tbl1x/Ncor2/Hdac3/Suv39h1/Kat2a/Kat14/Abhd12/Ndst1/Hdac6/Hdac5/Hdac8	15
BP	GO:0098732	macromolecule deacylation	15/2090	77/28891	0.000361318	0.00417912	0.00307506	Flna/Mta2/Tgfb1/Mta1/Tbl1x/Ncor2/Hdac3/Suv39h1/Kat2a/Kat14/Abhd12/Ndst1/Hdac6/Hdac5/Hdac8	15
BP	GO:0007266	Rho protein signal transduction	22/2090	138/28891	0.000376222	0.00433349	0.00318865	Arhgdia/Myo9b/Cul3/Cdc42se1/Heg1/Rhog/P2ry10/Abl1/Was/Celsr1/Flcn/Kctd10/Arhgap35/Bcr/Scai/Nfix/Bcl6/Gpr55/Itga3/Cdc42ep3/Vangl2/Nradd	22
BP	GO:0046632	alpha-beta T cell differentiation	22/2090	138/28891	0.000376222	0.00433349	0.00318865	Cbfb/Stat6/Tgfb1/Kmt2a/Ly9/Bcl11b/Ap3b1/Abl1/Ptger4/Rc3h2/Armc5/Zc3h12a/Myb/Klhl25/Cracr2a/Txk/Bcl6/Atp7a/Ctsl/Il18r1/Fut7/Cd1d1	22
BP	GO:1902749	regulation of cell cycle G2/M phase transition	20/2090	120/28891	0.00037689	0.00433349	0.00318865	Rcc2/Lmnb1/Rad21/Ccng1/Brd4/Paxip1/Cdc25a/Clspn/Cdkn1a/Ctc1/Cdc7/Rbbp8/Uimc1/Zfyve19/Abraxas1/Cdk10/Mbd4/Wnt10b/Dyrk3/Rad51c	20
BP	GO:0006024	glycosaminoglycan biosynthetic process	12/2090	54/28891	0.000392107	0.00449961	0.00331088	Tgfb1/Ap2a1/Chpf/Ext2/Slc35b2/Ptger4/Abcc5/Slc35d1/Glce/Pxylp1/Chst14/B4galt4	12
BP	GO:0006661	phosphatidylinositol biosynthetic process	18/2090	103/28891	0.000402014	0.00459136	0.00337839	Pi4ka/Pigt/Pigq/Vac14/Pip4k2b/Gpaa1/Pip5k1c/Pigs/Ttc7/Pign/Ttc7b/Pik3c2a/Inpp4a/Dgke/Pigl/Pigyl/Sla2/Pgap3	18
BP	GO:0000722	telomere maintenance via recombination	6/2090	15/28891	0.000402461	0.00459136	0.00337839	Brca2/Rad51d/Ercc4/Nsmce2/Xrcc3/Rad51c	6
BP	GO:0006167	AMP biosynthetic process	6/2090	15/28891	0.000402461	0.00459136	0.00337839	Paics/Gart/Atic/Pfas/Aprt/Prps2	6
BP	GO:0006006	glucose metabolic process	31/2090	225/28891	0.000415885	0.00470239	0.00346009	Atf4/Mdh2/Ogt/Akt1/Foxk2/Got1/Fabp5/Ptpn2/Mapk14/Dlat/Kat2a/Foxk1/Arpp19/Adpgk/Gpd2/Bckdk/Prkaca/Hectd4/Nr3c1/Eno1b/Kbtbd2/Acadm/Gpt2/Pgm2l1/Oma1/Lipa/Ppp1r3e/Dgkq/Cox11/Slc2a8/Gpt	31
BP	GO:0030166	proteoglycan biosynthetic process	13/2090	62/28891	0.000416626	0.00470239	0.00346009	Ctnnb1/Extl3/Cant1/Chpf/Ext2/Slc35b2/Ndst1/Hs6st1/Slc35d1/Glce/Pxylp1/Chst14/Vangl2	13
BP	GO:0007369	gastrulation	27/2090	186/28891	0.00041742	0.00470239	0.00346009	Myh9/Prkar1a/Wnk1/Txnrd1/Nr4a3/Ctnnb1/Arid1a/Htt/Cul3/Srf/Dusp5/Clasp1/Axin1/Ctr9/Cdc73/Ric8a/Smad2/Prkaca/Ext2/Leo1/Armc5/Lrp5/Pofut2/Ahdc1/Phldb1/Acvr2a/Vangl2	27
BP	GO:0071383	cellular response to steroid hormone stimulus	27/2090	186/28891	0.00041742	0.00470239	0.00346009	Atp1a1/Fkbp4/Phb2/Dnaja1/Mapk1/Parp1/Ddx17/Smarca4/Arid1a/Tgfb1/Safb2/Med1/Carm1/Ncor2/Uri1/Eif4ebp1/Gsk3a/Abhd2/Ufm1/Nr3c1/Rnf14/Zdhhc7/Uba5/Ufsp2/Vps18/Cry2/Peg13	27
BP	GO:0006901	vesicle coating	9/2090	33/28891	0.000417772	0.00470239	0.00346009	Sar1a/Cul3/Sec16a/Trappc10/Pdcd6/Gbf1/Arfgap2/Trappc6b/Trappc9	9
BP	GO:0018345	protein palmitoylation	9/2090	33/28891	0.000417772	0.00470239	0.00346009	Zdhhc3/Zdhhc6/Golga7/Selenok/Zdhhc8/Zdhhc7/Zdhhc16/Zdhhc24/Zdhhc1	9
BP	GO:0048488	synaptic vesicle endocytosis	15/2090	78/28891	0.000417829	0.00470239	0.00346009	Canx/Ctbp1/Bcl2l1/Ap2b1/Diaph1/Scrib/Pip5k1c/Synj1/Btbd9/Vamp4/Dennd1a/Pacsin1/Fcho2/Dgkq/Sh3gl3	15
BP	GO:0016052	carbohydrate catabolic process	25/2090	167/28891	0.000419949	0.00471716	0.00347096	Ppp1ca/Ogt/Ogdh/Foxk2/Git1/Foxk1/Adpgk/Man2c1/Rptor/Prkaca/Eno1b/Fkrp/Gaa/Flcn/Glb1/Man2b2/Prkag2/Ids/Lipa/Sik2/Idua/Ppp1r3e/Arsb/Ctbs/Sord	25
BP	GO:0016358	dendrite development	41/2090	327/28891	0.000421495	0.00472543	0.00347704	Actr2/Pak2/Dbnl/Pbrm1/Fmr1/Carm1/Git1/Clip1/Prmt3/Llph/Crkl/Ppp1r9b/Abl1/Gsk3a/Map1s/Arid1b/Mfn2/Crk/Tsc2/Pten/Crebbp/Nr3c1/Asap1/Tiam1/Pdlim5/Hdac6/Fbxo31/Mfsd2a/Crtc1/Spire1/Wasl/Pacsin1/Plk2/Parp6/Zfp365/Afdn/Dclk1/Atp7a/Ss18l1/Arc/Dynlt1a	41
BP	GO:0009306	protein secretion	51/2090	434/28891	0.000440068	0.00492421	0.00362331	Myh9/Ptbp1/Hcfc1/Rab8b/Prkar1a/Nadk/Htt/Tgfb1/Sidt2/Rab8a/Ap1g1/Ap1b1/Rab11b/Cd2ap/Anxa7/Madd/Erp29/Orai1/Myo5a/Zfp384/Smad2/Mia3/Llgl1/Rptor/Gnas/Lyst/Prkaca/Tmem258/Tcirg1/Ptger4/Dnajc1/Stxbp5/Tiam1/Myo18a/Nagpa/Atp13a2/Tvp23b/Golph3l/Stxbp3/Eipr1/Lrp5/Rab11fip3/Tango6/Rab11fip1/Idua/Slc4a8/P3h1/Rab11fip2/Rbm4/Rab3d/Slc18a2	51
BP	GO:0010586	miRNA metabolic process	18/2090	104/28891	0.000453791	0.00506806	0.00372915	Khsrp/Snd1/Ddx17/Ago2/Smarca4/Tgfb1/Yy1/Ncor2/Srf/Pnpt1/Drosha/Ago1/Tut7/Foxo3/Nr3c1/Rc3h2/Zc3h12a/Myb	18
BP	GO:0009755	hormone-mediated signaling pathway	25/2090	168/28891	0.000460082	0.00512851	0.00377363	Fkbp4/Phb2/Dnaja1/Mapk1/Parp1/Ddx17/Smarca4/Arid1a/Safb2/Med1/Carm1/Ncor2/Abhd2/Ufm1/Nr3c1/Rnf14/Zdhhc7/Uba5/Ufsp2/Ncoa1/Vps18/Cry2/Rarg/Peg13/Thrb	25
BP	GO:0035592	establishment of protein localization to extracellular region	51/2090	435/28891	0.000464253	0.00516515	0.00380059	Myh9/Ptbp1/Hcfc1/Rab8b/Prkar1a/Nadk/Htt/Tgfb1/Sidt2/Rab8a/Ap1g1/Ap1b1/Rab11b/Cd2ap/Anxa7/Madd/Erp29/Orai1/Myo5a/Zfp384/Smad2/Mia3/Llgl1/Rptor/Gnas/Lyst/Prkaca/Tmem258/Tcirg1/Ptger4/Dnajc1/Stxbp5/Tiam1/Myo18a/Nagpa/Atp13a2/Tvp23b/Golph3l/Stxbp3/Eipr1/Lrp5/Rab11fip3/Tango6/Rab11fip1/Idua/Slc4a8/P3h1/Rab11fip2/Rbm4/Rab3d/Slc18a2	51
BP	GO:0043255	regulation of carbohydrate biosynthetic process	19/2090	113/28891	0.000465768	0.00517215	0.00380575	Myh9/Ppp1ca/Ogt/Akt1/Tgfb1/Ptk2b/Gfpt1/Ptpn2/Kat2a/Ap2a1/Arpp19/Prkaca/Nr3c1/Ptger4/Acadm/Gpt2/Ppp1r3e/Dgkq/Gpt	19
BP	GO:0045948	positive regulation of translational initiation	7/2090	21/28891	0.000482762	0.00535069	0.00393712	Larp1/Khdrbs1/Uhmk1/Dnajc3/Polr2g/Mettl3/Impact	7
BP	GO:0070661	leukocyte proliferation	50/2090	425/28891	0.000484779	0.00536287	0.00394608	Msn/Prkar1a/Fkbp1a/Mapk1/Ndfip1/Tnfrsf4/Ctnnb1/Cd44/Stat6/Il12rb1/Bcl2l1/Cblb/Tgfb1/Zc3h12d/Dock8/Scrib/Ctla4/Impdh1/Cdkn1a/Abl1/Slamf1/Tnfrsf1b/Ncstn/Pkn1/Tsc2/Dlg1/Pten/Tyk2/Selenok/Tcirg1/Rc3h2/Pura/Card11/Zfp335/Armc5/Znhit1/Lmbr1l/Vav3/Tnfrsf14/Nfix/Lipa/Fadd/Gpam/Csf1/Ticam1/Tnfrsf21/Bcl6/Ager/Efnb1/Cd1d1	50
BP	GO:0006303	double-strand break repair via nonhomologous end joining	13/2090	63/28891	0.000490615	0.00540445	0.00397668	Nsd2/Hsf1/Mlh1/Rnf168/Helq/Smarcal1/Ercc8/Ercc4/Aunip/Shld2/Lig4/Rnf8/Setmar	13
BP	GO:0043457	regulation of cellular respiration	13/2090	63/28891	0.000490615	0.00540445	0.00397668	Shmt2/Ide/Akt1/Ppif/Cox7a2l/Pnpt1/Mfn2/Prkaca/Flcn/Tmem135/Abcd1/Atp7a/Opn3	13
BP	GO:0007029	endoplasmic reticulum organization	17/2090	96/28891	0.000491314	0.00540445	0.00397668	Wnk1/Bag6/Polr2m/Rab10/Htt/Ncln/Sec31a/Emc10/Sec16a/Esyt2/Myo5a/Tmco1/Mia3/Reep3/Lnpk/Zfyve27/Tmcc1	17
BP	GO:0045621	positive regulation of lymphocyte differentiation	22/2090	141/28891	0.000510075	0.00560028	0.00412077	Smarcc1/Smarca4/Cbfb/Arid1a/Tgfb1/Pbrm1/Smarcc2/Phf10/Actl6a/Ap3b1/Arid1b/Ambra1/Rhoh/Smarcd1/Kat5/Il15ra/Smarca2/Sox12/Klhl25/Wnt10b/Bcl6/Cd1d1	22
BP	GO:0035305	negative regulation of dephosphorylation	11/2090	48/28891	0.00051321	0.0056136	0.00413057	Ywhae/Ptpa/Ikbkb/Uri1/Mprip/Arpp19/Ppp1r9b/Akap1/Mgat5/Mastl/Cry2	11
BP	GO:0140718	facultative heterochromatin formation	11/2090	48/28891	0.00051321	0.0056136	0.00413057	Dnmt1/Trim28/Suz12/Smarca4/Suv39h1/Phf2/Ehmt1/Atf7ip/Jarid2/Phf8/Bend3	11
BP	GO:0071560	cellular response to transforming growth factor beta stimulus	33/2090	248/28891	0.000520611	0.00568391	0.0041823	Dnmt1/Parp1/Ogt/Tgfb1/Usp15/Kmt2a/Got1/Snx1/Ski/Crkl/Axin1/Snw1/Zyx/Dcp1a/Sinhcaf/Trim33/Crk/Smad2/Crebbp/Nr3c1/Spry1/Arid4a/Arid4b/Flcn/Gipc1/Tgfbr3/Zfp703/Wwox/Itga3/Wfikkn2/Vasn/Spry2/Rasl11b	33
BP	GO:0043393	regulation of protein binding	31/2090	228/28891	0.000523165	0.00570113	0.00419497	Trim28/Atp2a2/Ide/Sympk/Akt1/Cblb/Carm1/Zfpm1/Mark2/Plscr1/Cdkn1a/Abl1/Lfng/Mark3/Hsf1/Crk/Tfip11/Aplp2/Pkd1/Golga2/Tiam1/Cdon/Dhrs7b/Hdac5/Tgfbr3/Fam220a/Plk2/Ticam1/Adam15/Wfikkn2/Ctnnbip1	31
BP	GO:0032456	endocytic recycling	16/2090	88/28891	0.000525624	0.00571726	0.00420685	Rab8b/Rab7/Scrib/Rab8a/Rab11b/Snx27/Acap2/Lmtk2/Stx16/Ankrd50/Vamp4/Eipr1/Rab11fip3/Dennd1a/Micall1/Ehd3	16
BP	GO:0030041	actin filament polymerization	25/2090	170/28891	0.000550543	0.00597718	0.0043981	Capzb/Sptan1/Cotl1/Vasp/Dbnl/Mtpn/Diaph1/Ptk2b/Arpc4/Evl/Hax1/Ssh2/Abl1/Was/Capn1/Rasa1/Dlg1/Gba2/Spire1/Ttc17/Wasl/Kank3/Cdc42ep3/Cttn/Pfn2	25
BP	GO:1903510	mucopolysaccharide metabolic process	15/2090	80/28891	0.000553828	0.00600169	0.00441613	Cd44/Tgfb1/Ap2a1/Chpf/Ext2/Slc35b2/Ptger4/Abcc5/Ids/Slc35d1/Glce/Idua/Arsb/Chst14/B4galt4	15
BP	GO:0034394	protein localization to cell surface	14/2090	72/28891	0.000572072	0.00618791	0.00455316	Flna/Ctnnb1/Akt1/Kcnab2/Abca2/Rab11b/Ap3b1/Gbf1/Tsc2/Gga1/Slc28a2/Leprot/Plk2/Vcl	14
BP	GO:0099072	regulation of postsynaptic membrane neurotransmitter receptor levels	21/2090	133/28891	0.000575804	0.00621676	0.00457439	Ywhae/Ogt/Ap2b1/Erbin/Scrib/Clptm1/Rab8a/Git1/Vac14/Snx27/Ap2a1/Pip5k1c/Dlg1/Sh3glb2/Synj1/Prkci/Rnf216/Snap47/Neto2/Pacsin1/Arc	21
BP	GO:0006888	endoplasmic reticulum to Golgi vesicle-mediated transport	20/2090	124/28891	0.000582994	0.00628278	0.00462296	Htt/Sar1a/Tmed5/Cul3/Sec13/Sec31a/Bcap31/Sec16a/Trappc10/Pdcd6/Erp29/Ergic1/Sec22b/Mia3/Golga2/Cnih4/Trappc6b/Trappc9/Bet1/Lman2l	20
BP	GO:0006405	RNA export from nucleus	16/2090	89/28891	0.00059845	0.00643747	0.00473678	Tpr/Wnk1/Khdrbs1/Eif4a3/Nup188/Nup93/Pom121/Nol6/Rbm8a/Nup214/Fmr1/Nup133/Rbm15b/Casc3/Phax/Zc3h11a	16
BP	GO:0006261	DNA-templated DNA replication	23/2090	152/28891	0.000600218	0.00644452	0.00474197	Mcm2/Parp1/Pole/Upf1/Rfc5/Pold2/Cdc45/Carm1/Polg/Wiz/Ino80/Cdc7/Rbbp8/Brca2/Gins4/Chtf18/E2f8/Pura/Smarcal1/Primpol/E2f7/Zfp365/Setmar	23
BP	GO:0002091	negative regulation of receptor internalization	6/2090	16/28891	0.000604622	0.00644452	0.00474197	Ankrd13a/Fmr1/Mtmr2/Ubqln2/Atxn2/Rin3	6
BP	GO:0006177	GMP biosynthetic process	6/2090	16/28891	0.000604622	0.00644452	0.00474197	Paics/Gart/Atic/Pfas/Aprt/Impdh1	6
BP	GO:0072673	lamellipodium morphogenesis	6/2090	16/28891	0.000604622	0.00644452	0.00474197	Cd44/Coro1c/Myo9b/Wasf2/Snx1/Coro1b	6
BP	GO:0110156	methylguanosine-cap decapping	6/2090	16/28891	0.000604622	0.00644452	0.00474197	Eif4enif1/Edc4/Patl1/Dcp1a/Dcps/Lsm1	6
BP	GO:0036010	protein localization to endosome	8/2090	28/28891	0.000619409	0.00659011	0.0048491	Msn/Ezr/Ankrd13a/Scrib/Akap11/Pacsin2/Micall1/Zdhhc1	8
BP	GO:1901874	negative regulation of post-translational protein modification	17/2090	98/28891	0.000628291	0.00666931	0.00490737	U2af2/Noc2l/Dnaja1/Wnk1/Ogt/Ctnnb1/Akt1/Ubxn1/Prmt3/Abl1/Flcn/Nxn/Cep63/Limk1/P3h1/Hdac8/Spry2	17
BP	GO:0060768	regulation of epithelial cell proliferation involved in prostate gland development	5/2090	11/28891	0.000629137	0.00666931	0.00490737	Ctnnb1/Notch1/Apc/Serpinf1/Eaf2	5
BP	GO:0071692	protein localization to extracellular region	51/2090	441/28891	0.000636008	0.0067292	0.00495145	Myh9/Ptbp1/Hcfc1/Rab8b/Prkar1a/Nadk/Htt/Tgfb1/Sidt2/Rab8a/Ap1g1/Ap1b1/Rab11b/Cd2ap/Anxa7/Madd/Erp29/Orai1/Myo5a/Zfp384/Smad2/Mia3/Llgl1/Rptor/Gnas/Lyst/Prkaca/Tmem258/Tcirg1/Ptger4/Dnajc1/Stxbp5/Tiam1/Myo18a/Nagpa/Atp13a2/Tvp23b/Golph3l/Stxbp3/Eipr1/Lrp5/Rab11fip3/Tango6/Rab11fip1/Idua/Slc4a8/P3h1/Rab11fip2/Rbm4/Rab3d/Slc18a2	51
BP	GO:0031570	DNA integrity checkpoint signaling	21/2090	134/28891	0.000637091	0.0067292	0.00495145	Ccng1/Dot1l/Dgkz/Brd4/Ints7/Rbm38/Clspn/Mapk14/Mdm2/Cdkn1a/Uimc1/Brca2/Rad9a/Nek1/Hinfp/Fbxo31/Usp28/Abraxas1/Mbd4/Xpc/Setmar	21
BP	GO:2001252	positive regulation of chromosome organization	18/2090	107/28891	0.000645133	0.00680184	0.0050049	Sfpq/Trim28/Tpr/Rad21/Mapk1/Ctnnb1/Numa1/Yy1/Uchl5/Actl6a/Mcrs1/Ino80/Atf7ip/Slx4/Kat5/Nsmce2/Fen1/Lig4	18
BP	GO:1903038	negative regulation of leukocyte cell-cell adhesion	23/2090	153/28891	0.000658943	0.00693493	0.00510282	Prkar1a/Wnk1/Ndfip1/Cbfb/Cd44/Akt1/Cblb/Tgfb1/Zc3h12d/Scrib/Ptpn2/Ctla4/Tsc2/Mia3/Dlg1/Pten/Rc3h2/Pag1/Dapl1/Tnfrsf14/Zc3h12a/Tnfrsf21/Bcl6	23
BP	GO:0032515	negative regulation of phosphoprotein phosphatase activity	7/2090	22/28891	0.000664075	0.00697637	0.00513332	Ptpa/Ikbkb/Mprip/Ppp1r9b/Mgat5/Mastl/Cry2	7
BP	GO:0006605	protein targeting	38/2090	303/28891	0.000666659	0.00697842	0.00513482	Ywhae/Rab8b/Ogt/Bag6/Rab7/Spcs2/Erbin/Zdhhc3/Pmpca/Bcap31/Nucb1/Ap3b1/Gdi1/Gsk3a/Zdhhc6/Golga7/Herpud1/Mtch1/Os9/Sec61b/Mfn2/Aip/Pex6/Vps13d/Zdhhc7/Gipc1/Mon1b/Vps8/Srprb/Grpel2/Fbxo7/Micall1/Sec61a2/Trmt10b/Zdhhc24/Srp54a/Zdhhc1/Snx16	38
BP	GO:1903039	positive regulation of leukocyte cell-cell adhesion	38/2090	303/28891	0.000666659	0.00697842	0.00513482	Nr4a3/Smarcc1/Smarca4/Cbfb/Cd44/Arid1a/Il12rb1/Tgfb1/Dock8/Pbrm1/Smarcc2/Phf10/Irak1/Actl6a/Ap3b1/Abl1/Slamf1/Capn1/Arid1b/Tyk2/Selenok/Ambra1/Rhoh/Smarcd1/Kat5/Card11/Smarca2/Tnfrsf14/Sox12/Fadd/Klhl25/Gpam/Wnt10b/Bcl6/Fut7/Ager/Efnb1/Cd1d1	38
BP	GO:0006099	tricarboxylic acid cycle	9/2090	35/28891	0.0006706	0.00699459	0.00514673	Mdh2/Sdha/Ogdh/Dlst/Suclg1/Ireb2/Dlat/Sdhc/Sdhaf2	9
BP	GO:0032205	negative regulation of telomere maintenance	9/2090	35/28891	0.0006706	0.00699459	0.00514673	Hnrnpc/Parp1/Exosc10/Nat10/Ctc1/Mcrs1/Slx4/Smg6/Ercc4	9
BP	GO:0006360	transcription by RNA polymerase I	13/2090	65/28891	0.000672294	0.00699977	0.00515053	Mybbp1a/Atf4/Flna/Baz1b/Tcof1/Smarca4/Rrn3/Carm1/Polr2f/Crebbp/Phf8/Bend3/Pdcd7	13
BP	GO:0009408	response to heat	16/2090	90/28891	0.00067973	0.0070646	0.00519824	Ywhae/Tpr/Dnaja1/Dnaja2/Akt1/Eif2b5/Irak1/Pdcd6/Trp53inp1/Hsf1/Clpb/Prkaca/Slu7/Hikeshi/Rasa3/St8sia1	16
BP	GO:0032388	positive regulation of intracellular transport	27/2090	192/28891	0.000689815	0.00715667	0.00526599	Ywhae/Msn/Trim28/Flna/Tpr/Mapk1/Khdrbs1/Ezr/Dync1h1/Numa1/Tgfb1/Sar1a/Mapk14/Bcap31/Mdm2/Pcnt/Ice1/Hdac3/Emd/Rbm22/Gsk3a/Mtmr2/Prkaca/Eipr1/Zc3h12a/Bbc3/Cep131	27
BP	GO:0071559	response to transforming growth factor beta	33/2090	252/28891	0.00069113	0.00715761	0.00526667	Dnmt1/Parp1/Ogt/Tgfb1/Usp15/Kmt2a/Got1/Snx1/Ski/Crkl/Axin1/Snw1/Zyx/Dcp1a/Sinhcaf/Trim33/Crk/Smad2/Crebbp/Nr3c1/Spry1/Arid4a/Arid4b/Flcn/Gipc1/Tgfbr3/Zfp703/Wwox/Itga3/Wfikkn2/Vasn/Spry2/Rasl11b	33
BP	GO:0002064	epithelial cell development	32/2090	242/28891	0.00069875	0.00722371	0.00531532	Fasn/Msn/Atf4/Flna/Ezr/Smarca4/Rapgef1/Notch1/Tgfb1/Scrib/Sipa1/Sidt2/Bcl11b/Ikbkb/Heg1/Notch2/Flnb/Rheb/Akap11/Jmjd1c/Arid4a/Vezf1/Hsd17b4/Fndc3a/Arid4b/Sipa1l3/Afdn/Vcl/Rarg/Hrh2/Rilpl1/Dnase1l2	32
BP	GO:0043367	CD4-positive, alpha-beta T cell differentiation	17/2090	99/28891	0.000708256	0.00730905	0.00537811	Cbfb/Stat6/Tgfb1/Kmt2a/Ly9/Ptger4/Rc3h2/Armc5/Zc3h12a/Myb/Klhl25/Cracr2a/Bcl6/Atp7a/Ctsl/Il18r1/Fut7	17
BP	GO:0032943	mononuclear cell proliferation	46/2090	389/28891	0.000713655	0.00733884	0.00540003	Msn/Prkar1a/Fkbp1a/Ndfip1/Tnfrsf4/Ctnnb1/Cd44/Il12rb1/Bcl2l1/Cblb/Tgfb1/Zc3h12d/Dock8/Scrib/Ctla4/Impdh1/Cdkn1a/Abl1/Slamf1/Tnfrsf1b/Ncstn/Pkn1/Tsc2/Dlg1/Pten/Tyk2/Selenok/Rc3h2/Pura/Card11/Zfp335/Armc5/Znhit1/Lmbr1l/Vav3/Tnfrsf14/Lipa/Fadd/Gpam/Csf1/Ticam1/Tnfrsf21/Bcl6/Ager/Efnb1/Cd1d1	46
BP	GO:0062012	regulation of small molecule metabolic process	46/2090	389/28891	0.000713655	0.00733884	0.00540003	Myh9/Ubr4/Parp1/Ogt/Nr4a3/Akt1/Isyna1/Bcl2l1/Foxk2/Ptk2b/Fabp5/Ptpn2/Ncor2/Scap/Git1/Prmt3/Kat2a/Foxk1/Arpp19/Dbi/Bckdk/Apc/Rptor/Prkaca/Nr3c1/Tysnd1/Eno1b/Por/Bend3/Flcn/Acadm/Ankrd26/Gpt2/Prkag2/Mfsd2a/Klhl25/Sik2/Abcd1/Ppp1r3e/Dgkq/Arv1/Cox11/Gpt/Slc7a11/Star/Thrb	46
BP	GO:0006493	protein O-linked glycosylation	15/2090	82/28891	0.000725877	0.0074514	0.00548285	Ogt/Galnt1/Galnt6/Slc35c1/Fkrp/Galnt7/B3galnt2/Xxylt1/Galnt10/Tet2/Pomgnt1/Pofut2/Galnt11/B4gat1/Pomgnt2	15
BP	GO:0002381	immunoglobulin production involved in immunoglobulin-mediated immune response	14/2090	74/28891	0.000762181	0.00781035	0.00574697	Ndfip1/Nsd2/Stat6/Msh6/Tgfb1/Paxip1/Pou2f2/Mlh1/Rnf168/Crlf2/Shld2/Lig4/Rnf8/Bcl6	14
BP	GO:0090398	cellular senescence	16/2090	91/28891	0.000770243	0.00787914	0.00579759	Htt/Kat6a/Mapk14/Srf/Rbl1/Pnpt1/Suv39h1/Cdkn1a/Abl1/Icmt/Pten/Brca2/Nsmce2/Hmga1b/Plk2/Bcl6	16
BP	GO:0062197	cellular response to chemical stress	39/2090	316/28891	0.000779568	0.00796059	0.00585752	Ybx3/Atf4/Atp2a2/Dnaja1/Wnk1/Mapk1/Parp1/Akt1/Stat6/Usp15/Ppif/Letm1/Pnpt1/Abl1/Stk39/Capn1/Trp53inp1/Hsf1/Agap3/Rptor/Foxo3/Lrrc8c/Selenos/Ermp1/Arnt/Lrrc8d/Atp13a2/Micu1/Hdac6/Nr4a2/Zc3h12a/Rad52/Fancc/Abcd1/Mpv17/Atp7a/Selenon/Slc7a11/Srxn1	39
BP	GO:0042255	ribosome assembly	13/2090	66/28891	0.000782531	0.0079769	0.00586952	Fau/Eif5/C1qbp/Bop1/Eif2a/Dhx30/Rrs1/Traf7/Rrp7a/Dhx37/Dhx29/Noa1/Rpl24	13
BP	GO:1904950	negative regulation of establishment of protein localization	23/2090	155/28891	0.000791518	0.00805445	0.00592659	Rangap1/Dnaja1/Csk/Ogt/Ndfip1/Ube2j1/Hdac3/Gdi1/Madd/Erp29/Os9/Ei24/Rptor/Derl2/Ufm1/Akap1/Wwp2/Ndfip2/Rab11fip3/Rab11fip1/Erlec1/Idua/Rab23	23
BP	GO:0045333	cellular respiration	33/2090	254/28891	0.000793511	0.00806069	0.00593117	Mybbp1a/Shmt2/Mdh2/Ide/Sdha/Ogdh/Nr4a3/Akt1/Uqcrfs1/Dlst/Cox8a/Suclg1/Ppif/Cox7a2l/Cox5b/Cox5a/Pnpt1/Ireb2/Dlat/Sdhc/Mtfr1/Mfn2/Prkaca/Sdhaf2/Uqcr11/Ndufa3/Flcn/Tmem135/Nipsnap2/Mtfr2/Abcd1/Atp7a/Opn3	33
BP	GO:0000077	DNA damage checkpoint signaling	20/2090	127/28891	0.000795788	0.00806979	0.00593787	Ccng1/Dot1l/Dgkz/Brd4/Ints7/Rbm38/Clspn/Mapk14/Mdm2/Cdkn1a/Uimc1/Brca2/Rad9a/Nek1/Hinfp/Fbxo31/Usp28/Abraxas1/Mbd4/Xpc	20
BP	GO:0002183	cytoplasmic translational initiation	8/2090	29/28891	0.000801576	0.00808637	0.00595007	Eif5/Eif3i/Slbp/Eif4ebp1/Dhx29/Mettl3/Impact/Rbm4	8
BP	GO:0033119	negative regulation of RNA splicing	8/2090	29/28891	0.000801576	0.00808637	0.00595007	Ptbp1/U2af2/C1qbp/Ptbp3/Rnps1/Srsf4/Ptbp2/Pcbp4	8
BP	GO:0042558	pteridine-containing compound metabolic process	8/2090	29/28891	0.000801576	0.00808637	0.00595007	Shmt2/Gart/Atic/Mthfd1/Mthfd1l/Mtrr/Spr/Aldh1l2	8
BP	GO:0006984	ER-nucleus signaling pathway	10/2090	43/28891	0.000807778	0.00810692	0.00596519	Atf4/Atp2a2/Eif2a/Ptpn2/Scap/Atf6b/Tmco1/Atf6/Bcl2l11/Selenos	10
BP	GO:0009124	nucleoside monophosphate biosynthetic process	10/2090	43/28891	0.000807778	0.00810692	0.00596519	Cad/Paics/Gart/Atic/Pfas/Aprt/Prps2/Impdh1/Rfk/Uck1	10
BP	GO:0051294	establishment of spindle orientation	10/2090	43/28891	0.000807778	0.00810692	0.00596519	Numa1/Htt/Clasp1/Hdac3/Dctn1/Llgl1/Spry1/Kat5/Gpsm1/Spry2	10
BP	GO:0031334	positive regulation of protein-containing complex assembly	29/2090	214/28891	0.000819922	0.00820847	0.00603991	Lcp1/Eif4g1/Msn/Cand1/Numa1/Vasp/Tgfb1/Ptk2b/Piezo1/Evl/Ice1/Git1/Clip1/Dctn1/Med25/Dlg1/Apc/Ambra1/Bcl2l11/Psrc1/Slain1/Bbc3/Trim65/Wnt10b/Zdhhc1/Cdc42ep3/Cttn/Fes/Pfn2	29
BP	GO:0042692	muscle cell differentiation	53/2090	468/28891	0.000820706	0.00820847	0.00603991	Myh9/Ptbp1/Dnmt1/Cd53/Prkar1a/Atp2a2/Actn4/Smarca4/Ctnnb1/Ankrd17/Akt1/Arid1a/Notch1/Nfatc1/Tgfb1/Rbm38/Pbrm1/Yy1/Piezo1/Actn1/Mapk14/Mdm2/Srf/Csrp1/Hdac3/Ifrd1/Ski/Kat2a/Gsk3a/Ccnt2/Mfn2/Ptcd2/Spag9/Ctdp1/Nr3c1/Rb1/Fkrp/Acadm/Epc1/Znhit1/Cdon/Pdlim5/Smarca2/Hdac6/Hdac5/Cd9/Wnt10b/Smyd1/Wfikkn2/Rbm4/Selenon/Vangl2/Rbpms2	53
BP	GO:0001659	temperature homeostasis	27/2090	195/28891	0.000876747	0.00873117	0.00642452	Atf4/Ogt/Dync1h1/Smarca4/Stat6/Notch1/Lnpep/Fabp5/Hdac3/Rheb/Cnot3/Ehmt1/Mfn2/Hsf1/Apc/Fto/Gnas/Rb1/Flcn/Elovl6/Tfe3/Dhrs7b/Oma1/Alms1/Prkab2/Wnt10b/Il18r1	27
BP	GO:0007000	nucleolus organization	6/2090	17/28891	0.000877452	0.00873117	0.00642452	Usp36/Rrn3/Suv39h1/Phf2/Phf8/Bend3	6
BP	GO:0046112	nucleobase biosynthetic process	6/2090	17/28891	0.000877452	0.00873117	0.00642452	Shmt2/Cad/Paics/Gart/Aprt/Ctps2	6
BP	GO:0030308	negative regulation of cell growth	28/2090	205/28891	0.000882639	0.00876785	0.00645151	Smarca4/Tgfb1/Zc3h12d/Yy1/Ifrd1/Foxk1/Cdkn1a/Ppp1r9b/Gsk3a/Ei24/Spag9/Pten/Dip2b/Ctdp1/Zmat3/Eno1b/Rb1/Psrc1/Smarca2/Bbc3/Cdkn2c/St7l/Adam15/Prdm11/P3h1/Bcl6/Sertad3/Eaf2	28
BP	GO:0030520	intracellular estrogen receptor signaling pathway	11/2090	51/28891	0.000885394	0.00877997	0.00646044	Phb2/Parp1/Ddx17/Arid1a/Med1/Carm1/Ufm1/Uba5/Ufsp2/Vps18/Peg13	11
BP	GO:0015980	energy derivation by oxidation of organic compounds	42/2090	350/28891	0.000886866	0.00877997	0.00646044	Mybbp1a/Shmt2/Ppp1ca/Mdh2/Ide/Sdha/Ogdh/Nr4a3/Akt1/Uqcrfs1/Dlst/Cox8a/Suclg1/Ppif/Cox7a2l/Gfpt1/Cox5b/Cox5a/Pnpt1/Ireb2/Dlat/Sdhc/Stk40/Gsk3a/Mtfr1/Mfn2/Gnas/Prkaca/Sdhaf2/Uqcr11/Gaa/Ndufa3/Flcn/Acadm/Tmem135/Nipsnap2/Mtfr2/Prkag2/Abcd1/Ppp1r3e/Atp7a/Opn3	42
BP	GO:0010717	regulation of epithelial to mesenchymal transition	17/2090	101/28891	0.000894552	0.00881953	0.00648954	Ctnnb1/Notch1/Tgfb1/Clasp1/Tsc2/Smad2/Pten/Spry1/Sdhaf2/Tiam1/Tgfbr3/Pofut2/Zfp703/Phldb1/Vasn/Spry2/Ager	17
BP	GO:0030203	glycosaminoglycan metabolic process	17/2090	101/28891	0.000894552	0.00881953	0.00648954	Cd44/Tgfb1/Ap2a1/Chpf/Ext2/Slc35b2/Ptger4/Abcc5/Ndst1/Ids/Slc35d1/Glce/Idua/Pxylp1/Arsb/Chst14/B4galt4	17
BP	GO:0009168	purine ribonucleoside monophosphate biosynthetic process	7/2090	23/28891	0.000895391	0.00881953	0.00648954	Paics/Gart/Atic/Pfas/Aprt/Prps2/Impdh1	7
BP	GO:2001243	negative regulation of intrinsic apoptotic signaling pathway	18/2090	110/28891	0.000902042	0.00887008	0.00652674	Ybx3/Atf4/Noc2l/Dnaja1/Ctnnb1/Cd44/Akt1/Bcl2l1/Rrn3/Ppif/Mdm2/Uri1/Herpud1/Eno1b/Selenos/Cep63/Fbxo7/Creb3	18
BP	GO:0006023	aminoglycan biosynthetic process	12/2090	59/28891	0.000914485	0.00896226	0.00659456	Tgfb1/Ap2a1/Chpf/Ext2/Slc35b2/Ptger4/Abcc5/Slc35d1/Glce/Pxylp1/Chst14/B4galt4	12
BP	GO:0006513	protein monoubiquitination	12/2090	59/28891	0.000914485	0.00896226	0.00659456	Huwe1/Rnf10/Cul3/Zfp598/Rbx1/Rnf40/Pdcd6/Ube2o/Ube2t/Trim41/Ube2w/Ring1	12
BP	GO:0045055	regulated exocytosis	34/2090	267/28891	0.000951783	0.00931216	0.00685203	Myh9/Rap1b/Atp2a2/Lat/Sdf4/Nr4a3/Bcl2l1/Rab10/Notch1/Scrib/Fmr1/Ap1g1/Git1/Rab11b/Git2/Unc13d/Orai1/Prkaca/Stxbp5/Synj1/Stxbp3/Snap47/Bcr/Vps18/Rab11fip1/Slc4a8/Grik5/Rab11fip2/Rab3d/Slc18a2/Gata1/Doc2g/Fes/Pfn2	34
BP	GO:0019693	ribose phosphate metabolic process	44/2090	373/28891	0.000965968	0.00943515	0.00694252	Fasn/Cad/Paics/Gart/Atic/Mthfd1/Pfas/Parp1/Sdha/Ogdh/Bcl2l1/Aprt/Tgfb1/Acaca/Suclg1/Prps2/Impdh1/Dlat/Atp6v1b2/Sdhc/Prpsap1/Nudt3/Eno1b/Pank4/Rfk/Hsd17b4/Bend3/Ndufa3/Flcn/Uck1/Coasy/Ctps2/Entpd5/Gcdh/Adcy3/Lipa/Gpam/Abcd1/Rab23/Cox11/Atp7a/Acss1/Ehhadh/Acot6	44
BP	GO:0030521	androgen receptor signaling pathway	10/2090	44/28891	0.000978398	0.0095247	0.00700842	Fkbp4/Dnaja1/Mapk1/Ddx17/Smarca4/Arid1a/Safb2/Ncor2/Rnf14/Zdhhc7	10
BP	GO:0043039	tRNA aminoacylation	10/2090	44/28891	0.000978398	0.0095247	0.00700842	Farsb/Lrrc47/Mars2/Cars2/Dalrd3/Hars2/Sars2/Aars2/Gatb/Wars2	10
BP	GO:0032273	positive regulation of protein polymerization	16/2090	93/28891	0.000982327	0.00954704	0.00702485	Numa1/Vasp/Ptk2b/Evl/Git1/Clip1/Dctn1/Dlg1/Apc/Ambra1/Psrc1/Slain1/Cdc42ep3/Cttn/Fes/Pfn2	16
BP	GO:0010821	regulation of mitochondrion organization	22/2090	148/28891	0.000993084	0.00963555	0.00708998	Huwe1/Ghitm/Akt1/Bcl2l1/Htt/Ppif/Gsk3a/Zdhhc6/Mfn2/Ambra1/Bcl2l11/Vps13d/Flcn/Tmem135/Atp13a2/Rnf41/Clec16a/Fbxo7/Spire1/Oma1/Bbc3/Cttn	22
BP	GO:0001654	eye development	49/2090	428/28891	0.000998962	0.00967651	0.00712012	Atf4/Smarca4/Ctnnb1/Arid1a/Notch1/Tgfb1/Yy1/Scrib/Hipk1/Bcl11b/Med1/Kdm2b/Srf/Pcnt/Notch2/Ski/Jmjd6/Gpd2/Man2a1/Mfn2/Dlg1/Apc/Atf6/Spry1/Tcirg1/Fkrp/Prkci/Agtpbp1/Cdon/Tmem135/Arhgap35/Lrp5/Mfsd2a/Sipa1l3/Ring1/Zdhhc16/Nfix/Ttll5/Alms1/Meis3/Nphp4/Sall2/Rarg/Grcc10/B9d1/Rpl24/Trpm1/Spry2/Thrb	49
BP	GO:0046824	positive regulation of nucleocytoplasmic transport	14/2090	76/28891	0.00100307	0.00970017	0.00713753	Ywhae/Trim28/Flna/Tpr/Mapk1/Khdrbs1/Tgfb1/Mapk14/Mdm2/Hdac3/Emd/Rbm22/Prkaca/Zc3h12a	14
BP	GO:0000290	deadenylation-dependent decapping of nuclear-transcribed mRNA	5/2090	12/28891	0.00101437	0.00972896	0.00715871	Eif4enif1/Patl1/Dcp1a/Dcps/Lsm1	5
BP	GO:0060767	epithelial cell proliferation involved in prostate gland development	5/2090	12/28891	0.00101437	0.00972896	0.00715871	Ctnnb1/Notch1/Apc/Serpinf1/Eaf2	5
BP	GO:0072697	protein localization to cell cortex	5/2090	12/28891	0.00101437	0.00972896	0.00715871	Ezr/Numa1/Ppp1r9b/Nubp1/Mex3b	5
BP	GO:1904152	regulation of retrograde protein transport, ER to cytosol	5/2090	12/28891	0.00101437	0.00972896	0.00715871	Bcap31/Ube2j1/Os9/Derl2/Erlec1	5
BP	GO:1905214	regulation of RNA binding	5/2090	12/28891	0.00101437	0.00972896	0.00715871	Eif4g1/Eif4a3/Fmr1/Carm1/Gemin2	5
BP	GO:0016242	negative regulation of macroautophagy	8/2090	30/28891	0.00102438	0.0097788	0.00719539	Usp36/Ehmt2/Ubqln4/Sec22b/Tsc2/Rnf41/Clec16a/Qsox1	8
BP	GO:0048261	negative regulation of receptor-mediated endocytosis	8/2090	30/28891	0.00102438	0.0097788	0.00719539	Ankrd13a/Fmr1/Abca2/Mtmr2/Ubqln2/Atxn2/Rin3/Sh3gl3	8
BP	GO:0008154	actin polymerization or depolymerization	27/2090	197/28891	0.00102459	0.0097788	0.00719539	Capzb/Sptan1/Cotl1/Vasp/Dbnl/Mtpn/Diaph1/Ptk2b/Arpc4/Evl/Hax1/Ssh2/Abl1/Was/Capn1/Rasa1/Dlg1/Specc1l/Gba2/Arhgap35/Spire1/Ttc17/Wasl/Kank3/Cdc42ep3/Cttn/Pfn2	27
BP	GO:1905508	protein localization to microtubule organizing center	9/2090	37/28891	0.00103619	0.00987343	0.00726502	Numa1/Htt/Csnk1d/Cep250/Apc/Cep63/Rab11fip3/Ccdc14/Cep131	9
BP	GO:0033363	secretory granule organization	13/2090	68/28891	0.00104889	0.00992889	0.00730583	Ptbp1/Srgn/Mta1/Ap1g1/Ap1m1/Ap1b1/Ap3b1/Nbeal2/Lyst/Tbpl1/Hps3/Hps6/Rfx2	13
BP	GO:0009299	mRNA transcription	11/2090	52/28891	0.00105051	0.00992889	0.00730583	Atf4/Flna/Hipk3/Med1/Atf1/Ap3b1/Hltf/Taf4/Taf3/Ncoa1/Thrb	11
BP	GO:0034605	cellular response to heat	11/2090	52/28891	0.00105051	0.00992889	0.00730583	Ywhae/Tpr/Irak1/Pdcd6/Hsf1/Clpb/Prkaca/Slu7/Hikeshi/Rasa3/St8sia1	11
BP	GO:0043666	regulation of phosphoprotein phosphatase activity	11/2090	52/28891	0.00105051	0.00992889	0.00730583	Hsp90b1/Calm3/Htt/Ptpa/Ppp1r12a/Ikbkb/Mprip/Ppp1r9b/Mgat5/Mastl/Cry2	11
BP	GO:0044848	biological phase	11/2090	52/28891	0.00105051	0.00992889	0.00730583	Ctnnb1/Akt1/Notch1/Nfatc1/Myo5a/Jmjd1c/Mlh1/Haspin/Nfix/Wnt10b/Ctsl	11
BP	GO:0009259	ribonucleotide metabolic process	43/2090	364/28891	0.00106435	0.0100059	0.00736249	Fasn/Cad/Paics/Gart/Atic/Mthfd1/Pfas/Parp1/Sdha/Ogdh/Bcl2l1/Aprt/Tgfb1/Acaca/Suclg1/Prps2/Impdh1/Dlat/Atp6v1b2/Sdhc/Nudt3/Eno1b/Pank4/Rfk/Hsd17b4/Bend3/Ndufa3/Flcn/Uck1/Coasy/Ctps2/Entpd5/Gcdh/Adcy3/Lipa/Gpam/Abcd1/Rab23/Cox11/Atp7a/Acss1/Ehhadh/Acot6	43
BP	GO:0035023	regulation of Rho protein signal transduction	15/2090	85/28891	0.00106783	0.0100059	0.00736249	Arhgdia/Myo9b/Cul3/Cdc42se1/Heg1/P2ry10/Abl1/Flcn/Kctd10/Arhgap35/Bcr/Scai/Bcl6/Gpr55/Itga3	15
BP	GO:0002204	somatic recombination of immunoglobulin genes involved in immune response	12/2090	60/28891	0.00106894	0.0100059	0.00736249	Ndfip1/Nsd2/Stat6/Msh6/Tgfb1/Paxip1/Mlh1/Rnf168/Shld2/Lig4/Rnf8/Bcl6	12
BP	GO:0002208	somatic diversification of immunoglobulins involved in immune response	12/2090	60/28891	0.00106894	0.0100059	0.00736249	Ndfip1/Nsd2/Stat6/Msh6/Tgfb1/Paxip1/Mlh1/Rnf168/Shld2/Lig4/Rnf8/Bcl6	12
BP	GO:0006893	Golgi to plasma membrane transport	12/2090	60/28891	0.00106894	0.0100059	0.00736249	Csk/Rab10/Sec16a/Golga7/Nsf/Exoc6/Llgl1/Gga1/Vamp4/Golph3l/Exoc8/Bbs2	12
BP	GO:0045190	isotype switching	12/2090	60/28891	0.00106894	0.0100059	0.00736249	Ndfip1/Nsd2/Stat6/Msh6/Tgfb1/Paxip1/Mlh1/Rnf168/Shld2/Lig4/Rnf8/Bcl6	12
BP	GO:1902904	negative regulation of supramolecular fiber organization	25/2090	178/28891	0.001086	0.0101494	0.00746804	Fkbp4/Capzb/Sptan1/Pak2/Mtpn/Wasf2/Evl/Coro1b/Clasp1/Ssh2/Tbcd/Was/Capn1/Mfn2/Apc/Pfdn6/Specc1l/Hdgfl3/Camsap1/Eml2/Hdac6/Gmfg/Wdr47/Kank3/Pfn2	25
BP	GO:0048608	reproductive structure development	41/2090	343/28891	0.00109298	0.0101983	0.00750403	Myh9/Ybx3/Fkbp4/Flna/Ctnnb1/Cd44/Bcl2l1/Notch1/Nefh/Eif2b5/Safb2/Dhcr24/Crkl/Dhx37/Jmjd1c/Lfng/Mfn2/Dlg1/Pten/Apc/Patz1/Foxo3/Brca2/Zfx/Bcl2l11/Arid4a/Brip1/Taf4/Ptger4/Hsd17b4/Fndc3a/Arid4b/Ermp1/Fancg/Insl3/Insl6/Rarg/Acvr2a/Serpinf1/Eaf2/Gata1	41
BP	GO:0000910	cytokinesis	26/2090	188/28891	0.00109974	0.0102427	0.00753674	Myh9/Actr2/Wnk1/Calm3/Bcl2l1/Pdcd6ip/Cul3/Git1/Exoc6/Jtb/Apc/Brca2/E2f8/Flcn/Chmp5/Gipc1/Chmp6/Zfyve19/Klhl21/Rab11fip3/Exoc8/Spire1/Anxa11/E2f7/Zfp365/Map10	26
BP	GO:0046390	ribose phosphate biosynthetic process	29/2090	218/28891	0.00110125	0.0102427	0.00753674	Cad/Paics/Gart/Atic/Mthfd1/Pfas/Parp1/Sdha/Bcl2l1/Aprt/Tgfb1/Prps2/Impdh1/Dlat/Sdhc/Prpsap1/Eno1b/Pank4/Rfk/Ndufa3/Flcn/Uck1/Coasy/Ctps2/Gcdh/Adcy3/Lipa/Cox11/Acss1	29
BP	GO:0006109	regulation of carbohydrate metabolic process	28/2090	208/28891	0.00110654	0.0102755	0.00756088	Myh9/Ppp1ca/Ogt/Akt1/Tgfb1/Foxk2/Ptk2b/Gfpt1/Ptpn2/Git1/Kat2a/Foxk1/Ap2a1/Arpp19/Bckdk/Rptor/Prkaca/Nr3c1/Ptger4/Flcn/Acadm/Gpt2/Prkag2/Sik2/Ppp1r3e/Dgkq/Cox11/Gpt	28
BP	GO:0150063	visual system development	49/2090	431/28891	0.00116045	0.010759	0.00791663	Atf4/Smarca4/Ctnnb1/Arid1a/Notch1/Tgfb1/Yy1/Scrib/Hipk1/Bcl11b/Med1/Kdm2b/Srf/Pcnt/Notch2/Ski/Jmjd6/Gpd2/Man2a1/Mfn2/Dlg1/Apc/Atf6/Spry1/Tcirg1/Fkrp/Prkci/Agtpbp1/Cdon/Tmem135/Arhgap35/Lrp5/Mfsd2a/Sipa1l3/Ring1/Zdhhc16/Nfix/Ttll5/Alms1/Meis3/Nphp4/Sall2/Rarg/Grcc10/B9d1/Rpl24/Trpm1/Spry2/Thrb	49
BP	GO:0035196	miRNA processing	10/2090	45/28891	0.00117743	0.010822	0.00796297	Ago2/Tgfb1/Pum1/Drosha/Zc3h7b/Dgcr8/Ago1/Tut7/Mettl3/Zc3h10	10
BP	GO:0042771	intrinsic apoptotic signaling pathway in response to DNA damage by p53 class mediator	10/2090	45/28891	0.00117743	0.010822	0.00796297	Bag6/Cd44/Hipk1/Aen/Cdkn1a/Snw1/Brca2/Phlda3/Usp28/Bbc3	10
BP	GO:0043038	amino acid activation	10/2090	45/28891	0.00117743	0.010822	0.00796297	Farsb/Lrrc47/Mars2/Cars2/Dalrd3/Hars2/Sars2/Aars2/Gatb/Wars2	10
BP	GO:0099590	neurotransmitter receptor internalization	10/2090	45/28891	0.00117743	0.010822	0.00796297	Ap2b1/Scrib/Vac14/Ap2a1/Pip5k1c/Sh3glb2/Synj1/Rnf216/Pacsin1/Arc	10
BP	GO:0090287	regulation of cellular response to growth factor stimulus	39/2090	323/28891	0.00118062	0.010822	0.00796297	Ogt/Ctnnb1/Ptp4a3/Numa1/Notch1/Tgfb1/Usp15/Got1/Nptn/Snx1/Notch2/Ppp2r5d/Ski/Pdcd6/Axin1/Abl1/Snw1/Prkd2/Sinhcaf/Trim33/Smad2/Crebbp/Ube2o/Spry1/Arid4a/Arid4b/Flcn/Gipc1/Tgfbr3/Zfp703/Gpc1/Gpr155/Pelo/Itga3/Wfikkn2/Vasn/Spry2/Fgfrl1/Rasl11b	39
BP	GO:0032869	cellular response to insulin stimulus	29/2090	219/28891	0.00118349	0.010822	0.00796297	Ide/Mapk1/Parp1/Ogt/Smarcc1/Eif4ebp2/Akt1/Rab10/Rab8a/Ptpn2/Eif4ebp1/Pip4k2b/Zfp592/Gsk3a/Myo5a/Mfn2/Tsc2/Pten/Apc/Rb1/Zdhhc7/Prkci/Ankrd26/Ncoa1/Gpam/Sik2/Slc2a8/Rbm4/Fut7	29
BP	GO:0006760	folic acid-containing compound metabolic process	7/2090	24/28891	0.00118577	0.010822	0.00796297	Shmt2/Gart/Atic/Mthfd1/Mthfd1l/Mtrr/Aldh1l2	7
BP	GO:0018230	peptidyl-L-cysteine S-palmitoylation	7/2090	24/28891	0.00118577	0.010822	0.00796297	Zdhhc3/Zdhhc6/Golga7/Zdhhc8/Zdhhc7/Zdhhc24/Zdhhc1	7
BP	GO:0018231	peptidyl-S-diacylglycerol-L-cysteine biosynthetic process from peptidyl-cysteine	7/2090	24/28891	0.00118577	0.010822	0.00796297	Zdhhc3/Zdhhc6/Golga7/Zdhhc8/Zdhhc7/Zdhhc24/Zdhhc1	7
BP	GO:0048025	negative regulation of mRNA splicing, via spliceosome	7/2090	24/28891	0.00118577	0.010822	0.00796297	Ptbp1/U2af2/C1qbp/Ptbp3/Rnps1/Srsf4/Pcbp4	7
BP	GO:0016447	somatic recombination of immunoglobulin gene segments	13/2090	69/28891	0.00120813	0.0109918	0.0080879	Ndfip1/Nsd2/Stat6/Msh6/Tgfb1/Yy1/Paxip1/Mlh1/Rnf168/Shld2/Lig4/Rnf8/Bcl6	13
BP	GO:0061951	establishment of protein localization to plasma membrane	13/2090	69/28891	0.00120813	0.0109918	0.0080879	Csk/Rab7/Scrib/Rab8a/Snx27/Golga7/Nsf/Gga1/Vamp4/Golph3l/Afdn/Bbs2/Rilpl1	13
BP	GO:0039535	regulation of RIG-I signaling pathway	6/2090	18/28891	0.00123606	0.0112109	0.00824918	C1qbp/Ankrd17/Usp15/Pum1/Zcchc3/Nlrx1	6
BP	GO:1904294	positive regulation of ERAD pathway	6/2090	18/28891	0.00123606	0.0112109	0.00824918	Bag6/Ubqln1/Eif2a/Bcap31/Herpud1/Ubqln2	6
BP	GO:0030865	cortical cytoskeleton organization	11/2090	53/28891	0.00124021	0.0112273	0.00826123	Tln1/Ezr/Coro1c/Fmnl1/Pdcd6ip/Ikbkb/Actn1/Rhog/Akap11/Dlg1/Llgl1	11
BP	GO:0070227	lymphocyte apoptotic process	18/2090	113/28891	0.00124171	0.0112273	0.00826123	Noc2l/Tnfrsf4/Cd44/Akt1/Dock8/Bcl11b/Crkl/Prkd2/Pkn1/Pten/Bcl2l11/Pdcd7/Lmbr1l/Lipa/Bbc3/Fadd/Gpam/Tnfrsf21	18
BP	GO:0006979	response to oxidative stress	45/2090	389/28891	0.00127088	0.0114624	0.00843424	Atf4/Atp2a2/Ide/Mapk1/Parp1/Txnrd1/Nr4a3/Akt1/Stat6/Kpna4/Gpx4/Ptk2b/Ppif/Stk24/Pnpt1/Abl1/Capn1/Trp53inp1/Hsf1/Crk/Agap3/Selenok/Foxo3/Selenos/Gclm/Ermp1/Arnt/Mtf1/Atp13a2/Ercc8/Hdac6/Txnrd2/Nr4a2/Zc3h12a/Rad52/Glrx2/Fancc/Abcd1/Xpa/Mpv17/Atp7a/Selenon/Stc2/Slc7a11/Srxn1	45
BP	GO:0046825	regulation of protein export from nucleus	9/2090	38/28891	0.00127164	0.0114624	0.00843424	Ywhae/Tpr/Rangap1/Uhmk1/Mdm2/Hdac3/Emd/Rbm22/Prkaca	9
BP	GO:0009260	ribonucleotide biosynthetic process	28/2090	210/28891	0.00128184	0.0115366	0.0084888	Cad/Paics/Gart/Atic/Mthfd1/Pfas/Parp1/Sdha/Bcl2l1/Aprt/Tgfb1/Prps2/Impdh1/Dlat/Sdhc/Eno1b/Pank4/Rfk/Ndufa3/Flcn/Uck1/Coasy/Ctps2/Gcdh/Adcy3/Lipa/Cox11/Acss1	28
BP	GO:0015012	heparan sulfate proteoglycan biosynthetic process	8/2090	31/28891	0.00129404	0.0116105	0.00854321	Ctnnb1/Extl3/Ext2/Ndst1/Hs6st1/Glce/Pxylp1/Vangl2	8
BP	GO:0031116	positive regulation of microtubule polymerization	8/2090	31/28891	0.00129404	0.0116105	0.00854321	Numa1/Git1/Clip1/Dctn1/Apc/Psrc1/Slain1/Fes	8
BP	GO:0051224	negative regulation of protein transport	22/2090	151/28891	0.0012982	0.0116144	0.00854602	Rangap1/Csk/Ogt/Ndfip1/Ube2j1/Hdac3/Gdi1/Madd/Erp29/Os9/Ei24/Rptor/Derl2/Ufm1/Akap1/Wwp2/Ndfip2/Rab11fip3/Rab11fip1/Erlec1/Idua/Rab23	22
BP	GO:0001818	negative regulation of cytokine production	38/2090	314/28891	0.00129844	0.0116144	0.00854602	Srgn/C1qbp/Suz12/Rad21/Parp1/Csk/Ndfip1/Ezr/Tnfrsf4/Tgfb1/Cul3/Trim27/Yy1/Erbin/Nptn/Fxr1/Rbx1/Zfpm1/Hdac3/Git1/Cd2ap/Extl3/Cactin/Slamf1/Hsf1/Tia1/Crebbp/Ptger4/Selenos/Kat5/Zc3h12a/Abcd1/Tnfrsf21/Nfkbil1/Bcl6/Ticam2/Nlrx1/Ager	38
BP	GO:0051865	protein autoubiquitination	14/2090	78/28891	0.00130489	0.0116542	0.00857536	Rnf10/Mta1/Rnf187/Cul3/Jade2/Rbx1/Mdm2/Wwp2/Rchy1/Bfar/Rnf41/Ercc8/Ube2t/Rnf8	14
BP	GO:0002573	myeloid leukocyte differentiation	34/2090	272/28891	0.00131209	0.0117007	0.00860953	Fasn/Ndfip1/Ctnnb1/Nfatc1/Tgfb1/Med1/Hax1/Ptpn2/Mapk14/Zfpm1/Notch2/Ireb2/Ap3b1/Hsf1/Clpb/Apc/Rptor/Gnas/Nr3c1/Tcirg1/Rb1/Tmem64/Tfe3/Dhrs7b/Nfix/Fadd/Csf1/Srp54a/Gpr137/Gpr55/Ctnnbip1/Farp2/Gata1/Fes	34
BP	GO:0043467	regulation of generation of precursor metabolites and energy	23/2090	161/28891	0.00133683	0.011903	0.00875844	Shmt2/Phb2/Ppp1ca/Ide/Ogt/Akt1/Ppif/Cox7a2l/Gfpt1/Pnpt1/Git1/Myo5a/Mfn2/Rptor/Prkaca/Flcn/Tmem135/Prkag2/Sik2/Abcd1/Ppp1r3e/Atp7a/Opn3	23
BP	GO:0006275	regulation of DNA replication	19/2090	123/28891	0.00134367	0.0119276	0.0087765	Ankrd17/Yy1/Jade2/Rfc5/Uchl5/Ehmt2/Atf1/Actl6a/Gmnn/Wiz/Ctc1/Mcrs1/Ino80/Cdc7/Usp37/Chtf18/E2f8/Brpf3/E2f7	19
BP	GO:0051101	regulation of DNA binding	19/2090	123/28891	0.00134367	0.0119276	0.0087765	Trim28/Hjurp/Parp1/Dot1l/Smarca4/Ctnnb1/Brd4/Tgfb1/Hipk3/Hipk1/Ski/Rsf1/Rb1/Ercc4/H1f0/Wfikkn2/Ctnnbip1/Ager/Gata1	19
BP	GO:0048284	organelle fusion	24/2090	171/28891	0.00136373	0.0120636	0.00887656	Huwe1/Rab8b/Rab7/Rab8a/Afg3l1/Pip4k2b/Slamf1/Zdhhc6/Mfn2/Sec22b/Stx16/Chmp5/Tgfbrap1/Vps8/Vamp4/Atp13a2/Chmp6/Snap47/Vav3/Oma1/Stx8/Bet1/Vps18/Grik5	24
BP	GO:0051262	protein tetramerization	15/2090	87/28891	0.0013642	0.0120636	0.00887656	Shmt2/Vasp/Farsb/Acaca/Nudt21/Evl/Pkd1/Fkrp/Golga2/Osbpl2/Crtc3/Crtc1/Cbr4/Apip/Trpm1	15
BP	GO:0061458	reproductive system development	41/2090	347/28891	0.00136518	0.0120636	0.00887656	Myh9/Ybx3/Fkbp4/Flna/Ctnnb1/Cd44/Bcl2l1/Notch1/Nefh/Eif2b5/Safb2/Dhcr24/Crkl/Dhx37/Jmjd1c/Lfng/Mfn2/Dlg1/Pten/Apc/Patz1/Foxo3/Brca2/Zfx/Bcl2l11/Arid4a/Brip1/Taf4/Ptger4/Hsd17b4/Fndc3a/Arid4b/Ermp1/Fancg/Insl3/Insl6/Rarg/Acvr2a/Serpinf1/Eaf2/Gata1	41
BP	GO:0007162	negative regulation of cell adhesion	38/2090	315/28891	0.00137595	0.0121404	0.00893306	Rcc2/Prkar1a/Actn4/Wnk1/Ndfip1/Cbfb/Cd44/Akt1/Notch1/Coro1c/Cblb/Tgfb1/Zc3h12d/Scrib/Ptpn2/Akna/Ctla4/Abl1/Rasa1/Tsc2/Mia3/Dlg1/Pten/Sh2b3/Specc1l/Rc3h2/Pag1/Plxna1/Dapl1/Tnfrsf14/Zc3h12a/Cd9/Cbll1/Adam15/Tnfrsf21/Zfp703/Bcl6/Ager	38
BP	GO:0072521	purine-containing compound metabolic process	53/2090	479/28891	0.00138281	0.0121825	0.00896409	Fasn/Shmt2/Paics/Gart/Mdh2/Atic/Mthfd1/Pfas/Parp1/Sdha/Txnrd1/Ogdh/Dlst/Bcl2l1/Nadk/Kcnab2/Aprt/Tgfb1/Acaca/Suclg1/Prps2/Impdh1/Dlat/Atp6v1b2/Sdhc/Gpd2/Prpsap1/Icmt/Nudt3/Rptor/Eno1b/Pank4/Hsd17b4/Bend3/Ndufa3/Flcn/Dnph1/Coasy/Gcdh/Adcy3/Lipa/Gpam/Adal/Abcd1/Rab23/Nudt16/Cox11/Atp7a/Acss1/Ehhadh/Aldh1l2/Acot6/Slc2a9	53
BP	GO:0006334	nucleosome assembly	13/2090	70/28891	0.00138702	0.0122011	0.00897778	Mcm2/Brd2/Smarca4/Dnajc9/Kat6a/Chaf1a/Asf1b/Rsf1/Naa60/Smarca2/H1f0/Tspyl4/H3f3c	13
BP	GO:0051402	neuron apoptotic process	43/2090	369/28891	0.00139293	0.0122347	0.00900249	Atf4/Rad21/Parp1/Nr4a3/Ctnnb1/Bcl2l1/Htt/Tgfb1/Ptk2b/Traf7/Fmr1/Kdm2b/Xiap/Hdac3/Pigt/Abl1/Gsk3a/Ncstn/Map3k11/Ambra1/Nr3c1/Bcl2l11/Aimp2/Rb1/Gclm/Prkci/Akt1s1/Thap11/Tmbim4/Nr4a2/Fbxo7/Nfix/Bbc3/Myb/Fadd/Tnfrsf21/Lig4/Grik5/Atp7a/Star/Ager/Thrb/Slc25a27	43
BP	GO:2000146	negative regulation of cell motility	39/2090	326/28891	0.00140166	0.0122929	0.00904532	Myh9/Arhgdia/Ogt/Akt1/Notch1/Coro1c/Tgfb1/Cers2/Evl/Stk24/Srf/Coro1b/Clasp1/Was/Abhd2/Sinhcaf/Trp53inp1/Crk/Mia3/Pten/Patz1/Arid4a/Ptger4/Arid4b/Flcn/Rin3/Rnf41/Hdac5/Bcr/Tgfbr3/Scai/Wasl/Adam15/Srgap3/Afdn/Egfl7/Serpinf1/Ager/Pfn2	39
BP	GO:0006356	regulation of transcription by RNA polymerase I	10/2090	46/28891	0.00140827	0.0123139	0.00906078	Mybbp1a/Atf4/Flna/Baz1b/Smarca4/Carm1/Crebbp/Phf8/Bend3/Pdcd7	10
BP	GO:1902116	negative regulation of organelle assembly	10/2090	46/28891	0.00140827	0.0123139	0.00906078	Akt1/Ehmt2/Usp10/Kat2a/Mfn2/Sec22b/Cdk10/Tesk1/Tbc1d30/Nbdy	10
BP	GO:0048880	sensory system development	49/2090	435/28891	0.00141135	0.0123224	0.00906701	Atf4/Smarca4/Ctnnb1/Arid1a/Notch1/Tgfb1/Yy1/Scrib/Hipk1/Bcl11b/Med1/Kdm2b/Srf/Pcnt/Notch2/Ski/Jmjd6/Gpd2/Man2a1/Mfn2/Dlg1/Apc/Atf6/Spry1/Tcirg1/Fkrp/Prkci/Agtpbp1/Cdon/Tmem135/Arhgap35/Lrp5/Mfsd2a/Sipa1l3/Ring1/Zdhhc16/Nfix/Ttll5/Alms1/Meis3/Nphp4/Sall2/Rarg/Grcc10/B9d1/Rpl24/Trpm1/Spry2/Thrb	49
BP	GO:0031122	cytoplasmic microtubule organization	12/2090	62/28891	0.00144311	0.0125809	0.00925724	Ezr/Dync1h1/Numa1/Clasp1/Clip1/Axin1/Dlg1/Apc/Tubgcp6/Camsap1/Slain1/Map10	12
BP	GO:0033120	positive regulation of RNA splicing	11/2090	54/28891	0.00145717	0.0126657	0.00931958	Thrap3/U2af2/Snrnp70/Polr2a/Slc38a2/Dazap1/Eif4a3/Sf3b4/Rbm22/Snw1/Zfp64	11
BP	GO:0098586	cellular response to virus	11/2090	54/28891	0.00145717	0.0126657	0.00931958	Rrp1b/Tgfb1/Fmr1/Mapk14/Pou2f2/Ikbke/Gbf1/Crebbp/Zc3h12a/Mapk11/Gsdme	11
BP	GO:0002562	somatic diversification of immune receptors via germline recombination within a single locus	14/2090	79/28891	0.00148219	0.0128258	0.00943745	Ndfip1/Nsd2/Stat6/Msh6/Tgfb1/Yy1/Paxip1/Bcl11b/Mlh1/Rnf168/Shld2/Lig4/Rnf8/Bcl6	14
BP	GO:0007492	endoderm development	14/2090	79/28891	0.00148219	0.0128258	0.00943745	Myh9/Ctnnb1/Ankrd17/Notch1/Tgfb1/Med12/Dusp5/Ctr9/Cdc73/Smad2/Leo1/Ssbp3/Pelo/Arc	14
BP	GO:0016444	somatic cell DNA recombination	14/2090	79/28891	0.00148219	0.0128258	0.00943745	Ndfip1/Nsd2/Stat6/Msh6/Tgfb1/Yy1/Paxip1/Bcl11b/Mlh1/Rnf168/Shld2/Lig4/Rnf8/Bcl6	14
BP	GO:0050852	T cell receptor signaling pathway	21/2090	143/28891	0.00149343	0.012904	0.00949498	Wnk1/Mapk1/Khdrbs1/Lat/Ezr/Dgkz/Cblb/Eif2b5/Ptpn2/Ctla4/Crkl/Abl1/Prkd2/Usp12/Rc3h2/Card11/Zc3h12a/Lipa/Tnfrsf21/Txk/Sla2	21
BP	GO:0006022	aminoglycan metabolic process	18/2090	115/28891	0.00152398	0.0131485	0.0096749	Cd44/Tgfb1/Ap2a1/Chpf/Ext2/Slc35b2/Ptger4/Abcc5/Ndst1/Ids/Slc35d1/Glce/Idua/Pxylp1/Arsb/Ctbs/Chst14/B4galt4	18
BP	GO:0003281	ventricular septum development	15/2090	88/28891	0.00153651	0.0131826	0.00969998	Nsd2/Smarca4/Notch1/Nfatc1/Ap2b1/Heg1/Mdm2/Zfpm1/Rbm15/Sufu/Luzp1/Tgfbr3/Cplane1/Vangl2/Fgfrl1	15
BP	GO:0009127	purine nucleoside monophosphate biosynthetic process	7/2090	25/28891	0.001545	0.0131826	0.00969998	Paics/Gart/Atic/Pfas/Aprt/Prps2/Impdh1	7
BP	GO:0035855	megakaryocyte development	7/2090	25/28891	0.001545	0.0131826	0.00969998	Flna/Wasf2/Med1/Zfpm1/Srf/Nbeal2/Sh2b3	7
BP	GO:0050686	negative regulation of mRNA processing	7/2090	25/28891	0.001545	0.0131826	0.00969998	Ptbp1/U2af2/C1qbp/Ptbp3/Rnps1/Srsf4/Pcbp4	7
BP	GO:0060216	definitive hemopoiesis	7/2090	25/28891	0.001545	0.0131826	0.00969998	Smarca4/Cbfb/Kmt2a/Zfpm1/Bcr/Tgfbr3/Gata1	7
BP	GO:0009086	methionine biosynthetic process	5/2090	13/28891	0.0015505	0.0131826	0.00969998	Mthfd1/Mri1/Mtrr/Enoph1/Apip	5
BP	GO:0043650	dicarboxylic acid biosynthetic process	5/2090	13/28891	0.0015505	0.0131826	0.00969998	Mthfd1/Mthfd1l/Htt/Got1/Gls2	5
BP	GO:0048312	intracellular distribution of mitochondria	5/2090	13/28891	0.0015505	0.0131826	0.00969998	Cluh/Ogt/Kat2a/Armc1/Mfn2	5
BP	GO:2000105	positive regulation of DNA-templated DNA replication	5/2090	13/28891	0.0015505	0.0131826	0.00969998	Wiz/Ino80/Cdc7/E2f8/E2f7	5
BP	GO:2000271	positive regulation of fibroblast apoptotic process	5/2090	13/28891	0.0015505	0.0131826	0.00969998	Btg1/Apc/Bcl2l11/Bbc3/Prdm11	5
BP	GO:0030522	intracellular receptor signaling pathway	39/2090	328/28891	0.00156837	0.0133152	0.00979749	Fkbp4/C1qbp/Phb2/Actn4/Dnaja1/Mapk1/Parp1/Ddx17/Smarca4/Ankrd17/Arid1a/Ubqln1/Usp15/Erbin/Safb2/Fabp5/Med1/Carm1/Ncor2/Pum1/Crkl/Snw1/Clpb/Ufm1/Nr3c1/Rnf14/Zdhhc7/Uba5/Ufsp2/Tnip2/Ncoa1/Vps18/Ticam1/Cry2/Zcchc3/Rarg/Peg13/Nlrx1/Thrb	39
BP	GO:0048762	mesenchymal cell differentiation	32/2090	254/28891	0.0015729	0.0133343	0.00981157	Hnrnpab/Trim28/Flna/Tcof1/Mapk1/Ddx17/Ctnnb1/Notch1/Nfatc1/Coro1c/Tgfb1/Akna/Clasp1/Pdcd6/Tsc2/Smad2/Pten/Spry1/Sdhaf2/Tiam1/Zfp64/Tgfbr3/Pofut2/Rflnb/Adam15/Zfp703/Phldb1/Vasn/Vangl2/Spry2/Ager/Efnb1	32
BP	GO:0006516	glycoprotein catabolic process	8/2090	32/28891	0.00161721	0.013572	0.00998649	Man1a2/Man1b1/Ids/Hgsnat/Idua/Gpc1/Ctsl/Fbxo17	8
BP	GO:0034063	stress granule assembly	8/2090	32/28891	0.00161721	0.013572	0.00998649	G3bp1/Ubap2l/Dync1h1/Usp10/Fmr1/Tia1/Atxn2/Grb7	8
BP	GO:0035162	embryonic hemopoiesis	8/2090	32/28891	0.00161721	0.013572	0.00998649	Atf4/Smarca4/Kmt2a/Med1/Kat6a/Zfpm1/Sh2b3/Gata1	8
BP	GO:0036297	interstrand cross-link repair	8/2090	32/28891	0.00161721	0.013572	0.00998649	Faap100/Rad51d/Fancg/Ercc4/Xrcc3/Fancc/Xpa/Fan1	8
BP	GO:1903146	regulation of autophagy of mitochondrion	8/2090	32/28891	0.00161721	0.013572	0.00998649	Htt/Gsk3a/Ambra1/Vps13d/Rnf41/Clec16a/Fbxo7/Cttn	8
BP	GO:1903649	regulation of cytoplasmic transport	8/2090	32/28891	0.00161721	0.013572	0.00998649	Msn/Mapk1/Ezr/Map2k2/Dnajc13/Mtmr2/Eipr1/Rab11fip3	8
BP	GO:2000756	regulation of peptidyl-lysine acetylation	8/2090	32/28891	0.00161721	0.013572	0.00998649	Mybbp1a/Noc2l/Baz1b/Tgfb1/Dip2b/Nfyc/Hdac8/Hint2	8
BP	GO:0045862	positive regulation of proteolysis	43/2090	372/28891	0.00163011	0.0136606	0.0100517	Myh9/Psme1/Ogt/Bag6/Akt1/Ubqln1/Eif2a/Csnk1d/Ptk2b/Usp5/Traf7/Fmr1/Rbx1/Bcap31/Mdm2/Ctsc/Rnf40/Pdcd6/Axin1/Gsk3a/Herpud1/Mtch1/Tnfrsf1b/Gabarap/Ncstn/Hsf1/Pten/Bcl2l11/Rnf14/Eno1b/Ubqln2/Rchy1/Agtpbp1/Csnk1e/Btrc/Zc3h12a/Bbc3/Plk2/Fadd/Rnf144a/Ctsl/Perp/Ager	43
BP	GO:0046651	lymphocyte proliferation	44/2090	383/28891	0.0016369	0.0136979	0.0100791	Msn/Prkar1a/Fkbp1a/Ndfip1/Tnfrsf4/Ctnnb1/Cd44/Il12rb1/Cblb/Tgfb1/Zc3h12d/Dock8/Scrib/Ctla4/Impdh1/Cdkn1a/Abl1/Slamf1/Tnfrsf1b/Ncstn/Pkn1/Tsc2/Dlg1/Pten/Tyk2/Selenok/Rc3h2/Pura/Card11/Zfp335/Armc5/Znhit1/Lmbr1l/Vav3/Tnfrsf14/Lipa/Fadd/Gpam/Ticam1/Tnfrsf21/Bcl6/Ager/Efnb1/Cd1d1	44
BP	GO:0006383	transcription by RNA polymerase III	10/2090	47/28891	0.00167457	0.0139731	0.0102816	Mybbp1a/Baz1b/Gtf3c1/Ice1/Polr2f/Gtf3c4/Rptor/Gtf3c5/Brf1/Snapc1	10
BP	GO:0042789	mRNA transcription by RNA polymerase II	10/2090	47/28891	0.00167457	0.0139731	0.0102816	Atf4/Flna/Med1/Atf1/Ap3b1/Hltf/Taf4/Taf3/Ncoa1/Thrb	10
BP	GO:0033143	regulation of intracellular steroid hormone receptor signaling pathway	14/2090	80/28891	0.00167911	0.013991	0.0102948	Phb2/Parp1/Smarca4/Safb2/Med1/Carm1/Ncor2/Ufm1/Nr3c1/Rnf14/Uba5/Ufsp2/Vps18/Cry2	14
BP	GO:0032956	regulation of actin cytoskeleton organization	41/2090	351/28891	0.00169495	0.014038	0.0103293	Flna/Capzb/Sptan1/Pak2/Cotl1/Vasp/Dbnl/Mtpn/Tgfb1/Wasf2/Trim27/Ptk2b/Evl/Hax1/Coro1b/Rhog/Clasp1/Ssh2/Cd2ap/Abl1/Was/Capn1/Rasa1/Mfn2/Crk/Dlg1/Specc1l/Ptger4/Celsr1/Gba2/Arhgap35/Limk1/Gmfg/Cdk10/Alms1/Tesk1/Kank3/Cdc42ep3/Vangl2/Cttn/Pfn2	41
BP	GO:0006851	mitochondrial calcium ion transmembrane transport	6/2090	19/28891	0.00169676	0.014038	0.0103293	Ghitm/Akt1/Letm1/Mcur1/Micu1/Mcub	6
BP	GO:0006978	DNA damage response, signal transduction by p53 class mediator resulting in transcription of p21 class mediator	6/2090	19/28891	0.00169676	0.014038	0.0103293	Rbm38/Cdkn1a/Brca2/Kat5/Znhit1/Pcbp4	6
BP	GO:1903232	melanosome assembly	6/2090	19/28891	0.00169676	0.014038	0.0103293	Ap1g1/Ap1m1/Ap1b1/Ap3b1/Hps3/Hps6	6
BP	GO:2000641	regulation of early endosome to late endosome transport	6/2090	19/28891	0.00169676	0.014038	0.0103293	Msn/Mapk1/Ezr/Map2k2/Dnajc13/Mtmr2	6
BP	GO:1901799	negative regulation of proteasomal protein catabolic process	11/2090	55/28891	0.00170424	0.0140799	0.0103602	Ogt/Smarcc1/Bag6/Usp19/Uchl5/Ubxn1/Tlk2/Psmf1/Alad/Gipc1/Clec16a	11
BP	GO:0051235	maintenance of location	43/2090	373/28891	0.00171665	0.0141623	0.0104209	Flna/Srgn/Ghitm/Fkbp1a/Rangap1/Calm3/Akt1/B4galnt1/Polr2m/Htt/Cherp/Tgfb1/Diaph1/Ptk2b/Letm1/Ptpn2/Hdac3/Aup1/Mprip/Abl1/Os9/Myo5a/Ikbke/Dbi/Arl2bp/Fto/Pkd1/Vps13d/Fkrp/Gaa/Slc30a7/Sufu/Osbpl11/Taf3/Tmem135/Hilpda/Zc3h12a/Lipa/Bbc3/Creb3/Cry2/Grik5/Selenon	43
BP	GO:0010389	regulation of G2/M transition of mitotic cell cycle	17/2090	107/28891	0.00172209	0.0141872	0.0104392	Rcc2/Lmnb1/Rad21/Ccng1/Brd4/Cdc25a/Clspn/Cdkn1a/Ctc1/Cdc7/Rbbp8/Uimc1/Zfyve19/Abraxas1/Mbd4/Wnt10b/Rad51c	17
BP	GO:0002312	B cell activation involved in immune response	16/2090	98/28891	0.00173842	0.0143016	0.0105233	Ndfip1/Nsd2/Stat6/Msh6/Tgfb1/Ptk2b/Paxip1/Notch2/Abl1/Lfng/Mlh1/Rnf168/Shld2/Lig4/Rnf8/Bcl6	16
BP	GO:0002757	immune response-activating signaling pathway	49/2090	440/28891	0.00179113	0.0147145	0.0108271	C1qbp/Phb2/Wnk1/Mapk1/Khdrbs1/Csk/Lat/Ezr/Nr4a3/Bag6/Ankrd17/Rapgef1/Dgkz/Ubqln1/Cblb/Usp15/Erbin/Eif2b5/Irak1/Rps6ka3/Ptpn2/Pum1/Ctla4/Ap3b1/Plscr1/Crkl/Cactin/Abl1/Prkd2/Clpb/Usp12/Pten/Rc3h2/Pja2/Card11/Tnip2/Vav3/Zc3h12a/Lipa/Ticam1/Tnfrsf21/Nfkbil1/Txk/Sla2/Zcchc3/Rab11fip2/Cmtm3/Ticam2/Nlrx1	49
BP	GO:0071479	cellular response to ionizing radiation	13/2090	72/28891	0.00181105	0.0148573	0.0109322	Bcl2l1/Tgfb1/Ints7/Mapk14/Mdm2/Cdkn1a/Ino80/Hsf1/Tlk2/Brca2/Rad9a/Bbc3/Lig4	13
BP	GO:0009165	nucleotide biosynthetic process	33/2090	267/28891	0.00184489	0.0151136	0.0111208	Cad/Paics/Gart/Atic/Mthfd1/Pfas/Mapk1/Parp1/Sdha/Bcl2l1/Nadk/Aprt/Tgfb1/Prps2/Impdh1/Dlat/Sdhc/Prpsap1/Eno1b/Pank4/Rfk/Tbpl1/Ndufa3/Flcn/Uck1/Coasy/Ctps2/Slc52a2/Gcdh/Adcy3/Lipa/Cox11/Acss1	33
BP	GO:0007179	transforming growth factor beta receptor signaling pathway	27/2090	205/28891	0.00185309	0.0151595	0.0111546	Parp1/Ogt/Tgfb1/Usp15/Got1/Snx1/Ski/Axin1/Snw1/Zyx/Dcp1a/Sinhcaf/Trim33/Smad2/Crebbp/Spry1/Arid4a/Arid4b/Flcn/Gipc1/Tgfbr3/Zfp703/Itga3/Wfikkn2/Vasn/Spry2/Rasl11b	27
BP	GO:0001835	blastocyst hatching	9/2090	40/28891	0.00187139	0.0152452	0.0112177	Hcfc1/Smarca4/Bcor/Suv39h1/Ctr9/Asf1b/Rbbp8/Ube2a/Cmtm3	9
BP	GO:0035188	hatching	9/2090	40/28891	0.00187139	0.0152452	0.0112177	Hcfc1/Smarca4/Bcor/Suv39h1/Ctr9/Asf1b/Rbbp8/Ube2a/Cmtm3	9
BP	GO:0071684	organism emergence from protective structure	9/2090	40/28891	0.00187139	0.0152452	0.0112177	Hcfc1/Smarca4/Bcor/Suv39h1/Ctr9/Asf1b/Rbbp8/Ube2a/Cmtm3	9
BP	GO:0017157	regulation of exocytosis	29/2090	226/28891	0.00192312	0.0156448	0.0115117	Rap1b/Rab8b/Atp2a2/Bcl2l1/Notch1/Rab7/Pdcd6ip/Fmr1/Rab8a/Ap1g1/Clasp1/Git1/Git2/Unc13d/Myo5a/Nsf/Stxbp5/Atp13a2/Stxbp3/Bcr/Rab9/Vps18/Slc4a8/Sdc1/Rab3d/Gata1/Doc2g/Fes/Pfn2	29
BP	GO:0045995	regulation of embryonic development	15/2090	90/28891	0.00193605	0.0157062	0.0115569	Bag6/Ctnnb1/Notch1/Yy1/Uchl5/Clasp1/Actl6a/Kat2a/Mcrs1/Ino80/Rbm19/Ehmt1/Kat14/Nr2c2/Phldb1	15
BP	GO:2000117	negative regulation of cysteine-type endopeptidase activity	15/2090	90/28891	0.00193605	0.0157062	0.0115569	Pak2/Cd44/Akt1/Htt/Ints1/Dhcr24/Dnajb6/Rps6ka1/Rps6ka3/Mdm2/Xiap/Cst7/Herpud1/Por/Caap1	15
BP	GO:0016051	carbohydrate biosynthetic process	28/2090	216/28891	0.00195932	0.0158729	0.0116795	Myh9/Atf4/Ppp1ca/Mdh2/Parp1/Ogt/Akt1/Tgfb1/Ptk2b/Got1/Gfpt1/Ptpn2/Kat2a/Ap2a1/Arpp19/Gpd2/Prkaca/Nr3c1/Ext2/Ptger4/Acadm/Ndst1/Gpt2/Ppp1r3e/Dgkq/Gpt/Sord/Chst14	28
BP	GO:0072583	clathrin-dependent endocytosis	10/2090	48/28891	0.0019802	0.0159996	0.0117728	Canx/Ap2b1/Dgkd/Ap2a1/Tnk2/Ubqln2/Wasl/Fcho2/Smap1/Sh3gl3	10
BP	GO:0007062	sister chromatid cohesion	11/2090	56/28891	0.00198444	0.0159996	0.0117728	Sfpq/Phb2/Rad21/Ctnnb1/Stag1/Rb1/Haspin/Nsmce2/Fen1/Hdac8/Rad51c	11
BP	GO:0038066	p38MAPK cascade	11/2090	56/28891	0.00198444	0.0159996	0.0117728	Ezr/Mapk14/Map2k3/Stk39/Dlg1/Pja2/Nr2c2/Zc3h12a/Mapk11/Ager/Rell2	11
BP	GO:0022409	positive regulation of cell-cell adhesion	41/2090	354/28891	0.00198591	0.0159996	0.0117728	Nr4a3/Smarcc1/Smarca4/Cbfb/Cd44/Arid1a/Il12rb1/Tgfb1/Dock8/Pbrm1/Piezo1/Smarcc2/Phf10/Irak1/Actl6a/Ap3b1/Abl1/Slamf1/Capn1/Arid1b/Tyk2/Selenok/Ambra1/Rhoh/Smarcd1/Kat5/Card11/Smarca2/Tnfrsf14/Sox12/Fadd/Klhl25/Gpam/Afdn/Wnt10b/Bcl6/Mex3b/Fut7/Ager/Efnb1/Cd1d1	41
BP	GO:0006506	GPI anchor biosynthetic process	8/2090	33/28891	0.00200103	0.0160771	0.0118297	Pigt/Pigq/Gpaa1/Pigs/Pign/Pigl/Pigyl/Pgap3	8
BP	GO:1902751	positive regulation of cell cycle G2/M phase transition	8/2090	33/28891	0.00200103	0.0160771	0.0118297	Rcc2/Lmnb1/Brd4/Cdc25a/Cdc7/Wnt10b/Dyrk3/Rad51c	8
BP	GO:0009060	aerobic respiration	26/2090	196/28891	0.00201064	0.0161321	0.0118702	Shmt2/Mdh2/Ide/Sdha/Ogdh/Akt1/Uqcrfs1/Dlst/Cox8a/Suclg1/Ppif/Cox7a2l/Cox5b/Cox5a/Ireb2/Dlat/Sdhc/Mtfr1/Sdhaf2/Uqcr11/Ndufa3/Tmem135/Nipsnap2/Mtfr2/Abcd1/Atp7a	26
BP	GO:0002285	lymphocyte activation involved in immune response	29/2090	227/28891	0.00205592	0.016439	0.0120961	Lcp1/Ndfip1/Nsd2/Stat6/Msh6/Tgfb1/Kmt2a/Ptk2b/Paxip1/Ly9/Ap1g1/Notch2/Unc13d/Abl1/Lfng/Apbb1ip/Mlh1/Ptger4/Rnf168/Rc3h2/Zc3h12a/Myb/Shld2/Cracr2a/Lig4/Rnf8/Bcl6/Atp7a/Il18r1	29
BP	GO:0060538	skeletal muscle organ development	29/2090	227/28891	0.00205592	0.016439	0.0120961	Ybx3/Ddx17/Ctnnb1/Psma6/Notch1/Tgfb1/Usp19/Fxr1/Mapk14/Ski/Emd/Flnb/Ccnt2/Snw1/Gtf3c5/Rb1/Fkrp/Cdon/Med20/Hdac6/Hdac5/Nfix/Disp1/Gpc1/Wnt10b/Smyd1/Selenon/Mylpf/Fgfrl1	29
BP	GO:0032944	regulation of mononuclear cell proliferation	35/2090	290/28891	0.00205824	0.016439	0.0120961	Prkar1a/Ndfip1/Tnfrsf4/Ctnnb1/Cd44/Il12rb1/Bcl2l1/Cblb/Tgfb1/Zc3h12d/Scrib/Ctla4/Cdkn1a/Slamf1/Tnfrsf1b/Pkn1/Tsc2/Dlg1/Pten/Tyk2/Selenok/Card11/Zfp335/Znhit1/Vav3/Tnfrsf14/Fadd/Gpam/Csf1/Ticam1/Tnfrsf21/Bcl6/Ager/Efnb1/Cd1d1	35
BP	GO:0099518	vesicle cytoskeletal trafficking	13/2090	73/28891	0.00206015	0.016439	0.0120961	Actn4/Htt/Ap3b1/Madd/Bicdl1/Myo5a/Kifc1/Kif1c/Kif1b/Bloc1s4/Wasl/F8a/Fyco1	13
BP	GO:1901293	nucleoside phosphate biosynthetic process	33/2090	269/28891	0.00208398	0.0165942	0.0122103	Cad/Paics/Gart/Atic/Mthfd1/Pfas/Mapk1/Parp1/Sdha/Bcl2l1/Nadk/Aprt/Tgfb1/Prps2/Impdh1/Dlat/Sdhc/Prpsap1/Eno1b/Pank4/Rfk/Tbpl1/Ndufa3/Flcn/Uck1/Coasy/Ctps2/Slc52a2/Gcdh/Adcy3/Lipa/Cox11/Acss1	33
BP	GO:0051403	stress-activated MAPK cascade	31/2090	248/28891	0.00208529	0.0165942	0.0122103	Lmnb1/Dnaja1/Mapk1/Ezr/Rapgef1/Akt1/Hipk3/Ptk2b/Cdc42se1/Map2k2/Irak1/Mapk14/Mapk8ip3/Hdac3/Map2k3/Axin1/Slamf1/Stk39/Map3k11/Crk/Dlg1/Ptger4/Pja2/Nr2c2/Zc3h12a/Mapk11/Irak4/Cracr2a/Unc5cl/Ager/Rell2	31
BP	GO:0071677	positive regulation of mononuclear cell migration	14/2090	82/28891	0.00213848	0.0169943	0.0125047	C1qbp/Wnk1/Tgfb1/Dock8/Ptk2b/Abl1/Slamf1/Stk39/Selenok/Tnfrsf14/Fadd/Creb3/Csf1/Ager	14
BP	GO:0071887	leukocyte apoptotic process	22/2090	157/28891	0.00215442	0.0170539	0.0125485	Noc2l/Nr4a3/Tnfrsf4/Cd44/Akt1/Bcl2l1/Dock8/Bcl11b/Crkl/Prkd2/Pkn1/Pten/Bcl2l11/Selenos/Pdcd7/Lmbr1l/Lipa/Bbc3/Fadd/Gpam/Tnfrsf21/Slc7a11	22
BP	GO:0030111	regulation of Wnt signaling pathway	38/2090	323/28891	0.00215543	0.0170539	0.0125485	G3bp1/Wnk1/Smarca4/Ctnnb1/Rapgef1/Notch1/Tgfb1/Csnk1d/Mapk14/Xiap/Emd/Axin1/Abl1/Gsk3a/Cdc73/Spin1/Fam53b/Tsc2/Apc/Foxo3/Rnf14/Sdhaf2/Tmem64/Nxn/Tiam1/Csnk1e/Lmbr1l/Cmah/Btrc/Tmem237/Zfp703/Mks1/Wnt10b/Nphp4/Wwox/Itga3/Ctnnbip1/Vangl2	38
BP	GO:0006163	purine nucleotide metabolic process	49/2090	444/28891	0.00215653	0.0170539	0.0125485	Fasn/Paics/Gart/Mdh2/Atic/Mthfd1/Pfas/Parp1/Sdha/Txnrd1/Ogdh/Dlst/Bcl2l1/Nadk/Kcnab2/Aprt/Tgfb1/Acaca/Suclg1/Prps2/Impdh1/Dlat/Atp6v1b2/Sdhc/Gpd2/Prpsap1/Nudt3/Rptor/Eno1b/Pank4/Hsd17b4/Bend3/Ndufa3/Flcn/Dnph1/Coasy/Gcdh/Adcy3/Lipa/Gpam/Abcd1/Rab23/Nudt16/Cox11/Atp7a/Acss1/Ehhadh/Aldh1l2/Acot6	49
BP	GO:0007041	lysosomal transport	19/2090	128/28891	0.00215776	0.0170539	0.0125485	Rab7/Igf2r/Ap1g1/Ap3b1/Snx27/Lyst/Mvb12a/Chmp5/Tgfbrap1/Atp13a2/Chmp6/Clec16a/Hgsnat/Lipa/Stx8/Vps18/Ccdc91/Ehd3/Snx16	19
BP	GO:0051099	positive regulation of binding	26/2090	197/28891	0.00216057	0.0170539	0.0125485	Eif4g1/Trim28/Ide/Parp1/Smarca4/Ctnnb1/Brd4/Tgfb1/Hipk3/Hipk1/Fmr1/Ski/Abl1/Med25/Lfng/Mark3/Mfn2/Hsf1/Pkd1/Rb1/Tiam1/Fam220a/H1f0/Gpsm1/Plk2/Ticam1	26
BP	GO:0032535	regulation of cellular component size	46/2090	411/28891	0.00219769	0.0173235	0.0127469	Capzb/Wnk1/Sptan1/Ogt/Ezr/Cotl1/Akt1/Vasp/Dbnl/Mtpn/Ptk2b/Evl/Hax1/Srf/Ifrd1/Gdi1/Ssh2/Anxa7/Abl1/Stk39/Was/Capn1/Rasa1/Mfn2/Tsc2/Dlg1/Pten/Dip2b/Rptor/Specc1l/Abcb8/Rab22a/Akt1s1/Rin3/Atp13a2/Gba2/Zfyve27/Arhgap35/Limk1/Ttl/Kank3/Atp7a/Cdc42ep3/Cttn/Pfn2/Pex11g	46
BP	GO:0050868	negative regulation of T cell activation	20/2090	138/28891	0.00224048	0.0175915	0.0129441	Prkar1a/Ndfip1/Cbfb/Cd44/Cblb/Tgfb1/Zc3h12d/Scrib/Ptpn2/Ctla4/Tsc2/Dlg1/Pten/Rc3h2/Pag1/Dapl1/Tnfrsf14/Zc3h12a/Tnfrsf21/Bcl6	20
BP	GO:0006418	tRNA aminoacylation for protein translation	9/2090	41/28891	0.00224605	0.0175915	0.0129441	Farsb/Lrrc47/Mars2/Cars2/Dalrd3/Hars2/Sars2/Aars2/Wars2	9
BP	GO:0040001	establishment of mitotic spindle localization	9/2090	41/28891	0.00224605	0.0175915	0.0129441	Numa1/Htt/Clasp1/Hdac3/Dctn1/Spry1/Kat5/Gpsm1/Spry2	9
BP	GO:0030336	negative regulation of cell migration	37/2090	313/28891	0.00225022	0.0175915	0.0129441	Myh9/Arhgdia/Ogt/Akt1/Notch1/Coro1c/Tgfb1/Cers2/Evl/Stk24/Srf/Coro1b/Clasp1/Abhd2/Sinhcaf/Trp53inp1/Mia3/Pten/Patz1/Arid4a/Ptger4/Arid4b/Flcn/Rin3/Rnf41/Hdac5/Bcr/Tgfbr3/Scai/Wasl/Adam15/Srgap3/Afdn/Egfl7/Serpinf1/Ager/Pfn2	37
BP	GO:0070663	regulation of leukocyte proliferation	37/2090	313/28891	0.00225022	0.0175915	0.0129441	Prkar1a/Mapk1/Ndfip1/Tnfrsf4/Ctnnb1/Cd44/Stat6/Il12rb1/Bcl2l1/Cblb/Tgfb1/Zc3h12d/Scrib/Ctla4/Cdkn1a/Slamf1/Tnfrsf1b/Pkn1/Tsc2/Dlg1/Pten/Tyk2/Selenok/Card11/Zfp335/Znhit1/Vav3/Tnfrsf14/Fadd/Gpam/Csf1/Ticam1/Tnfrsf21/Bcl6/Ager/Efnb1/Cd1d1	37
BP	GO:0031440	regulation of mRNA 3'-end processing	5/2090	14/28891	0.002269	0.0175915	0.0129441	Papola/Ahcyl1/Fip1l1/Cdc73/Leo1	5
BP	GO:0045792	negative regulation of cell size	5/2090	14/28891	0.002269	0.0175915	0.0129441	Akt1/Mfn2/Tsc2/Pten/Akt1s1	5
BP	GO:0000729	DNA double-strand break processing	6/2090	20/28891	0.00227687	0.0175915	0.0129441	Rbbp8/Slx4/Brip1/Helq/Rad52/Setmar	6
BP	GO:0008334	histone mRNA metabolic process	6/2090	20/28891	0.00227687	0.0175915	0.0129441	Slbp/Exosc10/Upf1/Xrn1/Lsm1/Lsm11	6
BP	GO:0016075	rRNA catabolic process	6/2090	20/28891	0.00227687	0.0175915	0.0129441	Exosc10/Dis3/Xrn1/Zcchc7/Dis3l/Pelo	6
BP	GO:0035065	regulation of histone acetylation	6/2090	20/28891	0.00227687	0.0175915	0.0129441	Mybbp1a/Noc2l/Baz1b/Tgfb1/Nfyc/Hdac8	6
BP	GO:0042772	DNA damage response, signal transduction resulting in transcription	6/2090	20/28891	0.00227687	0.0175915	0.0129441	Rbm38/Cdkn1a/Brca2/Kat5/Znhit1/Pcbp4	6
BP	GO:0046827	positive regulation of protein export from nucleus	6/2090	20/28891	0.00227687	0.0175915	0.0129441	Ywhae/Tpr/Mdm2/Emd/Rbm22/Prkaca	6
BP	GO:1904505	regulation of telomere maintenance in response to DNA damage	6/2090	20/28891	0.00227687	0.0175915	0.0129441	Yy1/Uchl5/Actl6a/Mcrs1/Ino80/Ercc4	6
BP	GO:2000369	regulation of clathrin-dependent endocytosis	6/2090	20/28891	0.00227687	0.0175915	0.0129441	Dgkd/Tnk2/Ubqln2/Wasl/Smap1/Sh3gl3	6
BP	GO:0002181	cytoplasmic translation	21/2090	148/28891	0.00229887	0.0177308	0.0130466	Rpl3/Rps3a1/Rpl10a/Rps20/Rps16/Rpl27/Rpl29/Fau/Eif5/Eif3i/Slbp/Zc3h15/Rpl6l/Fmr1/Eif4ebp1/Dhx29/Unk/Mettl3/Impact/Rbm4/Rpl24	21
BP	GO:0072698	protein localization to microtubule cytoskeleton	11/2090	57/28891	0.00230096	0.0177308	0.0130466	Numa1/Htt/Diaph1/Csnk1d/Abl1/Cep250/Apc/Cep63/Rab11fip3/Ccdc14/Cep131	11
BP	GO:0060560	developmental growth involved in morphogenesis	35/2090	292/28891	0.00230954	0.0177734	0.0130779	Trim28/Ctnnb1/Dbnl/Notch1/Tgfb1/Jade2/Med12/Med1/Srf/Ifrd1/Nin/Llph/Gdi1/Abl1/Spag9/Pten/Dip2b/Spry1/Slc23a2/Tiam1/Zfyve27/Limk1/Hdac6/Impact/Plxna1/Nfix/Csf1/Ttl/Afdn/Vcl/Dclk1/Rarg/Vangl2/Spry2/Cttn	35
BP	GO:0006998	nuclear envelope organization	10/2090	49/28891	0.00232922	0.0178778	0.0131547	Lmnb1/Nup93/Dctn1/Emd/Ubxn2a/Lmnb2/Reep3/Tmem201/Chmp5/Chmp6	10
BP	GO:0031111	negative regulation of microtubule polymerization or depolymerization	10/2090	49/28891	0.00232922	0.0178778	0.0131547	Fkbp4/Clasp1/Tbcd/Apc/Specc1l/Hdgfl3/Camsap1/Eml2/Hdac6/Wdr47	10
BP	GO:1901264	carbohydrate derivative transport	13/2090	74/28891	0.00233677	0.0179122	0.01318	Lrrc8c/Slc35c1/Slc35b2/Slc35b1/Abcc5/Slc29a3/Abcc4/Spns1/Slc28a2/Mfsd2a/Slc35d1/Slc33a1/Ank	13
BP	GO:0006643	membrane lipid metabolic process	25/2090	188/28891	0.00234366	0.0179415	0.0132016	B4galnt1/St6galnac4/Cers2/Abca2/Pigt/Pigq/Gpaa1/Sgpp1/Pigs/Sptlc2/Pign/Elovl6/Gba2/St8sia1/Hacd2/Ormdl2/Cers6/Arv1/Pigl/Gla/Pigyl/Pgap3/Fut7/B4galt4/Elovl7	25
BP	GO:0120162	positive regulation of cold-induced thermogenesis	16/2090	101/28891	0.00239131	0.0182822	0.0134523	Ogt/Dync1h1/Smarca4/Stat6/Fabp5/Hdac3/Cnot3/Ehmt1/Mfn2/Hsf1/Apc/Gnas/Elovl6/Oma1/Alms1/Prkab2	16
BP	GO:0097581	lamellipodium organization	15/2090	92/28891	0.00241848	0.0184417	0.0135697	Actr2/Capzb/Ablim1/Cd44/Coro1c/Myo9b/Wasf2/Snx1/Coro1b/Was/Vav3/Vcl/Arhgef4/Atp7a/Cttn	15
BP	GO:1903432	regulation of TORC1 signaling	15/2090	92/28891	0.00241848	0.0184417	0.0135697	Akt1/Cul3/Sec13/Rbx1/Rheb/Tsc2/Prkaca/Flcn/Akt1s1/Clec16a/Ube2w/Dgkq/Dyrk3/Gpr137/Gpr155	15
BP	GO:0043010	camera-type eye development	43/2090	380/28891	0.00244262	0.01858	0.0136714	Atf4/Smarca4/Ctnnb1/Arid1a/Notch1/Tgfb1/Yy1/Scrib/Hipk1/Bcl11b/Med1/Kdm2b/Srf/Pcnt/Notch2/Ski/Jmjd6/Gpd2/Man2a1/Mfn2/Dlg1/Apc/Spry1/Tcirg1/Fkrp/Agtpbp1/Cdon/Tmem135/Arhgap35/Lrp5/Mfsd2a/Ring1/Nfix/Ttll5/Alms1/Nphp4/Rarg/Grcc10/B9d1/Rpl24/Trpm1/Spry2/Thrb	43
BP	GO:0061982	meiosis I cell cycle process	20/2090	139/28891	0.00244297	0.01858	0.0136714	Bag6/Eif4g3/Ehmt2/Cdc25a/Brca2/Bcl2l11/Chtf18/Mlh1/Slx4/Brip1/Syce2/Cep63/Rad51d/Haspin/Ercc4/Foxj2/Mybl1/Rad51c/Msh5/Mei4	20
BP	GO:0006505	GPI anchor metabolic process	8/2090	34/28891	0.00245304	0.0186323	0.0137099	Pigt/Pigq/Gpaa1/Pigs/Pign/Pigl/Pigyl/Pgap3	8
BP	GO:0050680	negative regulation of epithelial cell proliferation	23/2090	169/28891	0.00254236	0.0192856	0.0141906	Phb2/Suz12/Notch1/Nfatc1/Tgfb1/Med1/Aimp1/Cdc73/Hsf1/Tsc2/Dlg1/Pten/Apc/Brca2/Rb1/Flcn/Ift52/Tgfbr3/Wnt10b/Ctsl/Serpinf1/Eaf2/Ager	23
BP	GO:0007585	respiratory gaseous exchange by respiratory system	13/2090	75/28891	0.00264313	0.020024	0.014734	Stard7/Mapk8ip3/Ap3b1/Stk40/Man1a2/Man2a1/Fto/Slc5a3/Fkrp/Gaa/Ndst1/Nr4a2/Selenon	13
BP	GO:0033059	cellular pigmentation	11/2090	58/28891	0.00265715	0.0200781	0.0147738	Ap1g1/Ap1m1/Ap1b1/Rab11b/Ap3b1/Dctn1/Myo5a/Lyst/Hps3/Bloc1s4/Hps6	11
BP	GO:0043388	positive regulation of DNA binding	11/2090	58/28891	0.00265715	0.0200781	0.0147738	Trim28/Parp1/Smarca4/Ctnnb1/Brd4/Tgfb1/Hipk3/Hipk1/Ski/Rb1/H1f0	11
BP	GO:0003205	cardiac chamber development	26/2090	200/28891	0.00266888	0.0201313	0.0148129	Fkbp1a/Nsd2/Smarca4/Ctnnb1/Arid1a/Notch1/Nfatc1/Ap2b1/Tgfb1/Med1/Heg1/Mdm2/Zfpm1/Srf/Notch2/Rbm15/Gsk3a/Ptcd2/Sufu/Ndst1/Luzp1/Tgfbr3/Cplane1/Mks1/Vangl2/Fgfrl1	26
BP	GO:0099173	postsynapse organization	31/2090	252/28891	0.00267308	0.0201313	0.0148129	Hnrnpm/Actr2/Srgn/Ezr/Akt1/Dgkz/Dbnl/Wasf2/Ptk2b/Mark2/Prmt3/Snx27/Crkl/Rheb/Mfn2/Crk/Tsc2/Pten/Mtmr2/Asap1/Tiam1/Pdlim5/Hdac6/Wasl/Zfp365/Afdn/Itga3/Colq/Slc7a11/Arc/Cttn	31
BP	GO:0030866	cortical actin cytoskeleton organization	9/2090	42/28891	0.00267796	0.0201313	0.0148129	Tln1/Ezr/Coro1c/Fmnl1/Pdcd6ip/Ikbkb/Akap11/Dlg1/Llgl1	9
BP	GO:0044786	cell cycle DNA replication	9/2090	42/28891	0.00267796	0.0201313	0.0148129	Mcm2/Upf1/Cdc45/Wiz/Ino80/Cdc7/Brca2/E2f8/E2f7	9
BP	GO:0002429	immune response-activating cell surface receptor signaling pathway	34/2090	284/28891	0.00269379	0.0202242	0.0148813	Wnk1/Mapk1/Khdrbs1/Csk/Lat/Ezr/Nr4a3/Bag6/Rapgef1/Dgkz/Cblb/Eif2b5/Irak1/Ptpn2/Ctla4/Plscr1/Crkl/Abl1/Prkd2/Usp12/Pten/Rc3h2/Pja2/Card11/Tnip2/Vav3/Zc3h12a/Lipa/Tnfrsf21/Txk/Sla2/Rab11fip2/Cmtm3/Ticam2	34
BP	GO:0050890	cognition	42/2090	371/28891	0.00269913	0.0202383	0.0148916	Eif4ebp2/Htt/Kmt2a/Ehmt2/Vdac3/Nptn/Srf/Git1/Paip2/Kat2a/Abl1/Ncstn/Ric8a/Dbi/Pten/Crebbp/Gnas/Dgcr2/Pja2/Synj1/Ntan1/Btbd9/Atp8a1/Nr4a2/Mfsd2a/Crtc1/Klk8/Adcy3/Nfix/Plk2/Fen1/Idua/Gpr155/Itga3/Peg13/Prkar2b/Grcc10/Slc7a11/Hrh2/Arc/Serpinf1/Ager	42
BP	GO:0008643	carbohydrate transport	22/2090	160/28891	0.00273731	0.0204982	0.0150829	Ezr/Nr4a3/Akt1/Fabp5/Mapk14/Gsk3a/Rasa1/Mfn2/Tsc2/Slc35c1/Slc23a2/Zdhhc7/Prkci/Stxbp3/Mfsd2a/Slc35d1/Slc37a3/Repin1/Slc2a8/Slc2a9/Slc25a27/Opn3	22
BP	GO:0007178	transmembrane receptor protein serine/threonine kinase signaling pathway	45/2090	405/28891	0.0027991	0.0209341	0.0154037	Sub1/Parp1/Ogt/Numa1/Notch1/Lnpep/Tgfb1/Usp15/Nup93/Jade2/Got1/Snx1/Mapk14/Notch2/Rbm14/Ski/Axin1/Abl1/Snw1/Zyx/Dcp1a/Sinhcaf/Trim33/Hivep1/Smad2/Crebbp/Ube2o/Spry1/Arid4a/Arid4b/Flcn/Gipc1/Tgfbr3/Zfp703/Zc3h3/Ppm1l/Gpr155/Pelo/Itga3/Wfikkn2/Fam83g/Acvr2a/Vasn/Spry2/Rasl11b	45
BP	GO:0002764	immune response-regulating signaling pathway	49/2090	450/28891	0.00282604	0.0211086	0.015532	C1qbp/Phb2/Wnk1/Mapk1/Khdrbs1/Csk/Lat/Ezr/Nr4a3/Bag6/Ankrd17/Rapgef1/Dgkz/Ubqln1/Cblb/Usp15/Erbin/Eif2b5/Irak1/Rps6ka3/Ptpn2/Pum1/Ctla4/Ap3b1/Plscr1/Crkl/Cactin/Abl1/Prkd2/Clpb/Usp12/Pten/Rc3h2/Pja2/Card11/Tnip2/Vav3/Zc3h12a/Lipa/Ticam1/Tnfrsf21/Nfkbil1/Txk/Sla2/Zcchc3/Rab11fip2/Cmtm3/Ticam2/Nlrx1	49
BP	GO:0072676	lymphocyte migration	17/2090	112/28891	0.00283405	0.0211414	0.0155561	Msn/Wnk1/Akt1/Dock8/Ptk2b/Stk10/Crkl/Abl1/Stk39/Itgb7/Crk/Mia3/Selenok/Tnfrsf14/Wasl/Fadd/Fut7	17
BP	GO:2001234	negative regulation of apoptotic signaling pathway	31/2090	253/28891	0.00284042	0.0211619	0.0155712	Ybx3/Atf4/Noc2l/Ghitm/Maz/Dnaja1/Tnfrsf4/Ctnnb1/Cd44/Akt1/Bcl2l1/Htt/Rrn3/Ppif/Mdm2/Uri1/Madd/Herpud1/Mfn2/Eno1b/Rb1/Selenos/Gclm/Cep63/Nr4a2/Fbxo7/Caap1/Creb3/Meis3/Cttn/Gata1	31
BP	GO:0070059	intrinsic apoptotic signaling pathway in response to endoplasmic reticulum stress	12/2090	67/28891	0.00286794	0.0213397	0.015702	Atf4/Bag6/Bcl2l1/Ptpn2/Ube2k/Erp29/Herpud1/Selenok/Selenos/Bbc3/Creb3/Chac1	12
BP	GO:0050769	positive regulation of neurogenesis	38/2090	329/28891	0.00296752	0.0220289	0.0162092	Actr2/Ctnnb1/Dbnl/Notch1/Tgfb1/Jade2/Map2k2/Nptn/Fmr1/Spen/Srf/Notch2/Nin/Gdi1/Rheb/Tnfrsf1b/Snw1/Man2a1/Mfn2/Golga2/Synj1/Zfp335/Prkci/Tiam1/Cdon/Zfyve27/Limk1/Fbxo31/Plxna1/Myb/Parp6/Zfp365/Afdn/Lig4/Ss18l1/Star/Amigo1/Serpinf1	38
BP	GO:0010923	negative regulation of phosphatase activity	8/2090	35/28891	0.00298117	0.0220289	0.0162092	Ptpa/Ikbkb/Uri1/Mprip/Ppp1r9b/Mgat5/Mastl/Cry2	8
BP	GO:0031112	positive regulation of microtubule polymerization or depolymerization	8/2090	35/28891	0.00298117	0.0220289	0.0162092	Numa1/Git1/Clip1/Dctn1/Apc/Psrc1/Slain1/Fes	8
BP	GO:1905898	positive regulation of response to endoplasmic reticulum stress	8/2090	35/28891	0.00298117	0.0220289	0.0162092	Bag6/Ubqln1/Eif2a/Ptpn2/Bcap31/Herpud1/Atf6/Ubqln2	8
BP	GO:0016445	somatic diversification of immunoglobulins	13/2090	76/28891	0.00298155	0.0220289	0.0162092	Ndfip1/Nsd2/Stat6/Msh6/Tgfb1/Yy1/Paxip1/Mlh1/Rnf168/Shld2/Lig4/Rnf8/Bcl6	13
BP	GO:0009067	aspartate family amino acid biosynthetic process	6/2090	21/28891	0.00299451	0.0220289	0.0162092	Mthfd1/Got1/Mri1/Mtrr/Enoph1/Apip	6
BP	GO:0035268	protein mannosylation	6/2090	21/28891	0.00299451	0.0220289	0.0162092	Dpy19l1/Fkrp/Pomgnt1/Dpy19l3/B4gat1/Pomgnt2	6
BP	GO:0045649	regulation of macrophage differentiation	6/2090	21/28891	0.00299451	0.0220289	0.0162092	Tgfb1/Ptpn2/Hsf1/Rb1/Fadd/Csf1	6
BP	GO:0060155	platelet dense granule organization	6/2090	21/28891	0.00299451	0.0220289	0.0162092	Ap1g1/Ap1m1/Ap1b1/Ap3b1/Hps3/Hps6	6
BP	GO:1901796	regulation of signal transduction by p53 class mediator	14/2090	85/28891	0.00301832	0.0221761	0.0163175	Rps20/Cd44/Bop1/Usp15/Rrs1/Rrn3/Mdm2/Pak1ip1/Hexim1/Smyd2/Cep63/Znhit1/Pcbp4/Dyrk3	14
BP	GO:0044782	cilium organization	46/2090	418/28891	0.00304722	0.0223604	0.0164531	Actr2/Flna/Ablim1/Akt1/Htt/Csnk1d/Vdac3/Rab8a/Pcnt/Dctn1/Cep250/Unc119b/Atmin/Atp6v1d/Asap1/Nek1/Ift52/Abcc4/Arhgap35/Hdac6/Poc1b/Rab11fip3/Cep78/Cdk10/Ttc17/Ttll5/Alms1/Cplane1/Tmem237/Ehd3/Tesk1/Tbc1d30/Mks1/Rab23/Cep131/Dnmbp/Lrrc61/Ttll3/Bbs2/Dnaaf2/B9d1/Ptpdc1/Dnah17/Vangl2/Rilpl1/Rfx2	46
BP	GO:1901607	alpha-amino acid biosynthetic process	11/2090	59/28891	0.00305651	0.0223723	0.0164618	Shmt2/Cad/Mthfd1/Got1/Psph/Mri1/Mtrr/Bcat2/Enoph1/Apip/Gls2	11
BP	GO:1902808	positive regulation of cell cycle G1/S phase transition	11/2090	59/28891	0.00305651	0.0223723	0.0164618	Eif4g1/Phb2/Ankrd17/Akt1/Mdm2/Cdc73/Mepce/Mtbp/Crebbp/Rptor/Lsm11	11
BP	GO:0046823	negative regulation of nucleocytoplasmic transport	7/2090	28/28891	0.00314359	0.0229522	0.0168885	Tpr/Rangap1/Hdac3/Ei24/Ufm1/Akap1/Rab23	7
BP	GO:0099149	regulation of postsynaptic neurotransmitter receptor internalization	7/2090	28/28891	0.00314359	0.0229522	0.0168885	Scrib/Vac14/Pip5k1c/Synj1/Rnf216/Pacsin1/Arc	7
BP	GO:0000423	mitophagy	9/2090	43/28891	0.00317301	0.023035	0.0169495	Huwe1/Phb2/Ogt/Mfn2/Ambra1/Vps13d/Rnf41/Hdac6/Clec16a	9
BP	GO:0050685	positive regulation of mRNA processing	9/2090	43/28891	0.00317301	0.023035	0.0169495	Thrap3/Snrnp70/Dazap1/Eif4a3/Sf3b4/Cdc73/Snw1/Leo1/Zfp64	9
BP	GO:0072348	sulfur compound transport	9/2090	43/28891	0.00317301	0.023035	0.0169495	Slc6a6/Lrrc8c/Slc35b2/Slc19a2/Lrrc8d/Slc26a2/Slc33a1/Slc25a26/Slc7a11	9
BP	GO:1901983	regulation of protein acetylation	9/2090	43/28891	0.00317301	0.023035	0.0169495	Mybbp1a/Noc2l/Baz1b/Tgfb1/Dip2b/Nfyc/Kat5/Hdac8/Hint2	9
BP	GO:0006188	IMP biosynthetic process	5/2090	15/28891	0.00320227	0.023035	0.0169495	Paics/Gart/Atic/Pfas/Aprt	5
BP	GO:0006555	methionine metabolic process	5/2090	15/28891	0.00320227	0.023035	0.0169495	Mthfd1/Mri1/Mtrr/Enoph1/Apip	5
BP	GO:0045651	positive regulation of macrophage differentiation	5/2090	15/28891	0.00320227	0.023035	0.0169495	Tgfb1/Hsf1/Rb1/Fadd/Csf1	5
BP	GO:0048308	organelle inheritance	5/2090	15/28891	0.00320227	0.023035	0.0169495	Mapk1/Map2k2/Vrk1/Gbf1/Golga2	5
BP	GO:0048313	Golgi inheritance	5/2090	15/28891	0.00320227	0.023035	0.0169495	Mapk1/Map2k2/Vrk1/Gbf1/Golga2	5
BP	GO:0052646	alditol phosphate metabolic process	5/2090	15/28891	0.00320227	0.023035	0.0169495	Gpd2/Rfk/Acp6/Gpam/Gk5	5
BP	GO:1904507	positive regulation of telomere maintenance in response to DNA damage	5/2090	15/28891	0.00320227	0.023035	0.0169495	Yy1/Uchl5/Actl6a/Mcrs1/Ino80	5
BP	GO:2000622	regulation of nuclear-transcribed mRNA catabolic process, nonsense-mediated decay	5/2090	15/28891	0.00320227	0.023035	0.0169495	Hnrnpab/Eif4a3/Rbm8a/Casc3/Dhx34	5
BP	GO:0001707	mesoderm formation	12/2090	68/28891	0.00325774	0.0234052	0.0172219	Prkar1a/Txnrd1/Nr4a3/Htt/Srf/Axin1/Smad2/Prkaca/Ext2/Armc5/Pofut2/Ahdc1	12
BP	GO:0042113	B cell activation	37/2090	320/28891	0.00327785	0.0235208	0.017307	Phb2/Ndfip1/Tnfrsf4/Nsd2/Stat6/Txlna/Nfatc1/Msh6/Tgfb1/Yy1/Ptk2b/Paxip1/Ptpn2/Notch2/Ctla4/Cdkn1a/Abl1/Pou2f2/Lfng/Pkn1/Tsc2/Pten/Mlh1/Tcirg1/Rnf168/Card11/Tnip2/Cmtm7/Hdac5/Vav3/Myb/Ticam1/Shld2/Tnfrsf21/Lig4/Rnf8/Bcl6	37
BP	GO:0050870	positive regulation of T cell activation	33/2090	277/28891	0.00332631	0.0238392	0.0175413	Smarcc1/Smarca4/Cbfb/Arid1a/Il12rb1/Tgfb1/Dock8/Pbrm1/Smarcc2/Phf10/Actl6a/Ap3b1/Abl1/Slamf1/Arid1b/Tyk2/Selenok/Ambra1/Rhoh/Smarcd1/Kat5/Card11/Smarca2/Tnfrsf14/Sox12/Fadd/Klhl25/Gpam/Wnt10b/Bcl6/Ager/Efnb1/Cd1d1	33
BP	GO:0060998	regulation of dendritic spine development	14/2090	86/28891	0.00337025	0.0241246	0.0177512	Actr2/Dbnl/Pbrm1/Fmr1/Llph/Mfn2/Tsc2/Pten/Crebbp/Nr3c1/Asap1/Tiam1/Plk2/Afdn	14
BP	GO:0060271	cilium assembly	43/2090	387/28891	0.00342064	0.0244552	0.0179945	Actr2/Flna/Ablim1/Akt1/Htt/Csnk1d/Vdac3/Rab8a/Pcnt/Dctn1/Cep250/Unc119b/Atmin/Atp6v1d/Asap1/Nek1/Ift52/Abcc4/Arhgap35/Poc1b/Rab11fip3/Cdk10/Ttll5/Alms1/Cplane1/Tmem237/Ehd3/Tesk1/Tbc1d30/Mks1/Rab23/Cep131/Dnmbp/Lrrc61/Ttll3/Bbs2/Dnaaf2/B9d1/Ptpdc1/Dnah17/Vangl2/Rilpl1/Rfx2	43
BP	GO:0043523	regulation of neuron apoptotic process	36/2090	310/28891	0.00343493	0.0245274	0.0180476	Atf4/Rad21/Parp1/Nr4a3/Ctnnb1/Bcl2l1/Htt/Ptk2b/Traf7/Fmr1/Kdm2b/Xiap/Hdac3/Abl1/Gsk3a/Map3k11/Ambra1/Nr3c1/Bcl2l11/Aimp2/Gclm/Prkci/Akt1s1/Thap11/Tmbim4/Nr4a2/Fbxo7/Nfix/Bbc3/Myb/Lig4/Grik5/Atp7a/Star/Ager/Slc25a27	36
BP	GO:0003231	cardiac ventricle development	21/2090	153/28891	0.0034439	0.0245589	0.0180708	Fkbp1a/Nsd2/Smarca4/Ctnnb1/Notch1/Nfatc1/Ap2b1/Tgfb1/Med1/Heg1/Mdm2/Zfpm1/Rbm15/Gsk3a/Ptcd2/Sufu/Luzp1/Tgfbr3/Cplane1/Vangl2/Fgfrl1	21
BP	GO:0051147	regulation of muscle cell differentiation	22/2090	163/28891	0.00344775	0.0245589	0.0180708	Ptbp1/Dnmt1/Ankrd17/Notch1/Nfatc1/Tgfb1/Rbm38/Yy1/Piezo1/Mapk14/Mdm2/Hdac3/Kat2a/Gsk3a/Ccnt2/Ctdp1/Nr3c1/Epc1/Hdac5/Smyd1/Rbm4/Rbpms2	22
BP	GO:0060443	mammary gland morphogenesis	11/2090	60/28891	0.0035027	0.0249199	0.0183365	Phb2/Stat6/Tgfb1/Scrib/Med1/Capn1/Nr3c1/Lrp5/Btrc/Csf1/Zfp157	11
BP	GO:0009112	nucleobase metabolic process	8/2090	36/28891	0.0035937	0.0254743	0.0187444	Shmt2/Cad/Paics/Gart/Mapk1/Aprt/Tet2/Ctps2	8
BP	GO:0071539	protein localization to centrosome	8/2090	36/28891	0.0035937	0.0254743	0.0187444	Htt/Csnk1d/Cep250/Apc/Cep63/Rab11fip3/Ccdc14/Cep131	8
BP	GO:2000515	negative regulation of CD4-positive, alpha-beta T cell activation	8/2090	36/28891	0.0035937	0.0254743	0.0187444	Ndfip1/Cbfb/Cd44/Cblb/Rc3h2/Tnfrsf14/Zc3h12a/Bcl6	8
BP	GO:0060491	regulation of cell projection assembly	27/2090	215/28891	0.00364453	0.0257607	0.0189551	Rcc2/Actr2/Capzb/Akt1/Htt/Coro1c/Wasf2/Evl/Fmr1/Fxr1/Srf/Rhog/Was/Atmin/Apc/Def8/Arhgap35/Rab11fip3/Cdk10/Wasl/Mien1/Tesk1/Tbc1d30/Atp7a/Cdc42ep3/Cttn/Pfn2	27
BP	GO:0007127	meiosis I	19/2090	134/28891	0.00364734	0.0257607	0.0189551	Bag6/Eif4g3/Ehmt2/Brca2/Bcl2l11/Chtf18/Mlh1/Slx4/Brip1/Syce2/Cep63/Rad51d/Haspin/Ercc4/Foxj2/Mybl1/Rad51c/Msh5/Mei4	19
BP	GO:0043244	regulation of protein-containing complex disassembly	19/2090	134/28891	0.00364734	0.0257607	0.0189551	Capzb/Wnk1/Sptan1/Mtpn/Upf1/Ubqln4/Evl/Scaf4/Clasp1/Map1s/Apc/Specc1l/Hdgfl3/Camsap1/Tecpr1/Hdac6/Clec16a/Fyco1/Wdr47	19
BP	GO:0009064	glutamine family amino acid metabolic process	12/2090	69/28891	0.00368923	0.0259624	0.0191035	Cad/Pfas/Got1/Gfpt1/Apc/Gclm/Ctps2/Dglucy/Slc39a8/Gls2/Aldh4a1/Slc7a11	12
BP	GO:0070231	T cell apoptotic process	12/2090	69/28891	0.00368923	0.0259624	0.0191035	Tnfrsf4/Akt1/Dock8/Bcl11b/Prkd2/Bcl2l11/Pdcd7/Lmbr1l/Lipa/Bbc3/Fadd/Gpam	12
BP	GO:0072678	T cell migration	12/2090	69/28891	0.00368923	0.0259624	0.0191035	Msn/Wnk1/Dock8/Crkl/Abl1/Stk39/Itgb7/Crk/Selenok/Tnfrsf14/Fadd/Fut7	12
BP	GO:0009266	response to temperature stimulus	22/2090	164/28891	0.00371644	0.0261224	0.0192213	Ywhae/Tpr/Dnaja1/Dnaja2/Akt1/Eif2b5/Dnajc3/Irak1/Pdcd6/Trp53inp1/Hsf1/Clpb/Prkaca/Slu7/Hikeshi/Acadm/Rasa3/Tmem135/St8sia1/Lipa/Wdr47/Slc25a27	22
BP	GO:0035886	vascular associated smooth muscle cell differentiation	9/2090	44/28891	0.00373734	0.0262378	0.0193061	Dnmt1/Smarca4/Ctnnb1/Notch1/Nfatc1/Pbrm1/Srf/Smarca2/Vangl2	9
BP	GO:0002200	somatic diversification of immune receptors	14/2090	87/28891	0.00375497	0.0262668	0.0193275	Ndfip1/Nsd2/Stat6/Msh6/Tgfb1/Yy1/Paxip1/Bcl11b/Mlh1/Rnf168/Shld2/Lig4/Rnf8/Bcl6	14
BP	GO:0008088	axo-dendritic transport	14/2090	87/28891	0.00375497	0.0262668	0.0193275	Sfpq/Dync1h1/Htt/Fmr1/Mapk8ip3/Ap3b1/Madd/Myo5a/Kif1c/Kif1b/Pura/Agtpbp1/Hdac6/Bloc1s4	14
BP	GO:0022406	membrane docking	14/2090	87/28891	0.00375497	0.0262668	0.0193275	Rab8b/Atp2a2/Rab7/Ahcyl1/Rab8a/Esyt2/Exoc6/Stx16/Pacs2/Stxbp3/Exoc8/Stx8/Vps18/Rab3d	14
BP	GO:0007249	canonical NF-kappaB signal transduction	31/2090	258/28891	0.00381762	0.0266731	0.0196265	Nfkb2/Ube2i/Parp1/Ctnnb1/Ankrd17/Akt1/Brd4/Usp10/Ikbkb/Irak1/Rbx1/Cactin/Trim8/Abl1/Rhoh/Card11/Myo18a/Tnip2/Btrc/Zc3h12a/Wdr83/Tab3/Slc39a8/Irak4/Ticam1/Usp20/Card6/Nfkbil1/Unc5cl/Ticam2/Nlrx1	31
BP	GO:0030220	platelet formation	6/2090	22/28891	0.00386843	0.0269314	0.0198166	Myh9/Actn1/Zfpm1/Srf/Nbeal2/Gata1	6
BP	GO:0044851	hair cycle phase	6/2090	22/28891	0.00386843	0.0269314	0.0198166	Ctnnb1/Akt1/Notch1/Myo5a/Wnt10b/Ctsl	6
BP	GO:0097502	mannosylation	6/2090	22/28891	0.00386843	0.0269314	0.0198166	Dpy19l1/Fkrp/Pomgnt1/Dpy19l3/B4gat1/Pomgnt2	6
BP	GO:0006891	intra-Golgi vesicle-mediated transport	7/2090	29/28891	0.00388878	0.0269767	0.0198499	Copz1/Trappc10/Nsf/Rab6a/Cog8/Cog1/Cog7	7
BP	GO:0032469	endoplasmic reticulum calcium ion homeostasis	7/2090	29/28891	0.00388878	0.0269767	0.0198499	Atp2a2/Bcap31/Herpud1/Tmco1/Selenok/Pacs2/Bbc3	7
BP	GO:0051560	mitochondrial calcium ion homeostasis	7/2090	29/28891	0.00388878	0.0269767	0.0198499	Letm1/Bcap31/Mfn2/Mcur1/Micu1/Mcub/Slc25a27	7
BP	GO:0043502	regulation of muscle adaptation	16/2090	106/28891	0.00392575	0.0272008	0.0200148	Atp2a2/Parp1/Nr4a3/Mtpn/Notch1/Nfatc1/Yy1/Gsk3a/Tnfrsf1b/Foxo3/Ctdp1/Nr3c1/Jarid2/Akap1/Gtf2ird1/Selenon	16
BP	GO:0110053	regulation of actin filament organization	33/2090	280/28891	0.00393262	0.0272161	0.020026	Flna/Capzb/Sptan1/Pak2/Cotl1/Vasp/Dbnl/Mtpn/Wasf2/Trim27/Ptk2b/Evl/Hax1/Coro1b/Clasp1/Ssh2/Abl1/Was/Capn1/Rasa1/Dlg1/Specc1l/Ptger4/Gba2/Arhgap35/Limk1/Gmfg/Alms1/Tesk1/Kank3/Cdc42ep3/Cttn/Pfn2	33
BP	GO:0000288	nuclear-transcribed mRNA catabolic process, deadenylation-dependent decay	11/2090	61/28891	0.00399951	0.0275812	0.0202946	Pabpc1/Eif4enif1/Ago2/Polr2g/Cnot3/Patl1/Dcp1a/Mlh1/Dcps/Rc3h2/Lsm1	11
BP	GO:0030167	proteoglycan catabolic process	4/2090	10/28891	0.00402314	0.0275812	0.0202946	Ids/Hgsnat/Idua/Gpc1	4
BP	GO:0045876	positive regulation of sister chromatid cohesion	4/2090	10/28891	0.00402314	0.0275812	0.0202946	Sfpq/Rad21/Nsmce2/Fen1	4
BP	GO:0045990	carbon catabolite regulation of transcription	4/2090	10/28891	0.00402314	0.0275812	0.0202946	Ogt/Srf/Ncoa1/Sik2	4
BP	GO:0046543	development of secondary female sexual characteristics	4/2090	10/28891	0.00402314	0.0275812	0.0202946	Phb2/Tgfb1/Med1/Irf2bpl	4
BP	GO:0070862	negative regulation of protein exit from endoplasmic reticulum	4/2090	10/28891	0.00402314	0.0275812	0.0202946	Ube2j1/Os9/Derl2/Erlec1	4
BP	GO:0090161	Golgi ribbon formation	4/2090	10/28891	0.00402314	0.0275812	0.0202946	Tmed5/Golga2/Myo18a/Vamp4	4
BP	GO:1900246	positive regulation of RIG-I signaling pathway	4/2090	10/28891	0.00402314	0.0275812	0.0202946	Ankrd17/Usp15/Pum1/Zcchc3	4
BP	GO:0032970	regulation of actin filament-based process	44/2090	402/28891	0.00407843	0.0279274	0.0205494	Myh9/Atp1a1/Flna/Atp2a2/Capzb/Sptan1/Pak2/Cotl1/Vasp/Dbnl/Mtpn/Tgfb1/Wasf2/Trim27/Ptk2b/Evl/Hax1/Coro1b/Rhog/Clasp1/Ssh2/Cd2ap/Abl1/Was/Capn1/Rasa1/Mfn2/Crk/Dlg1/Specc1l/Ptger4/Celsr1/Gba2/Arhgap35/Limk1/Gmfg/Cdk10/Alms1/Tesk1/Kank3/Cdc42ep3/Vangl2/Cttn/Pfn2	44
BP	GO:0043122	regulation of canonical NF-kappaB signal transduction	27/2090	217/28891	0.00413928	0.0283109	0.0208316	Ube2i/Parp1/Ctnnb1/Ankrd17/Brd4/Usp10/Ikbkb/Irak1/Rbx1/Cactin/Trim8/Abl1/Rhoh/Card11/Tnip2/Btrc/Zc3h12a/Wdr83/Tab3/Slc39a8/Irak4/Ticam1/Usp20/Card6/Unc5cl/Ticam2/Nlrx1	27
BP	GO:0090307	mitotic spindle assembly	12/2090	70/28891	0.00416556	0.0284573	0.0209393	Flna/Tpr/Stag1/Clasp1/Kifc1/Kif2a/Mzt1/Golga2/Chmp5/Chmp6/Abraxas1/Map10	12
BP	GO:1902117	positive regulation of organelle assembly	14/2090	88/28891	0.00417468	0.0284864	0.0209607	Lcp1/G3bp1/Msn/Ubap2l/Dync1h1/Numa1/Htt/Pdcd6ip/Pip4k2b/Atmin/Atg2a/Arhgap35/Wdr45/Sdc1	14
BP	GO:0040013	negative regulation of locomotion	40/2090	358/28891	0.00420651	0.0286203	0.0210592	Myh9/Arhgdia/Ogt/Akt1/Notch1/Coro1c/Tgfb1/Cers2/Evl/Stk24/Ptpn2/Srf/Coro1b/Clasp1/Was/Abhd2/Sinhcaf/Trp53inp1/Crk/Mia3/Pten/Patz1/Arid4a/Ptger4/Arid4b/Flcn/Rin3/Rnf41/Hdac5/Bcr/Tgfbr3/Scai/Wasl/Adam15/Srgap3/Afdn/Egfl7/Serpinf1/Ager/Pfn2	40
BP	GO:0014009	glial cell proliferation	13/2090	79/28891	0.00421391	0.0286203	0.0210592	Ctnnb1/Notch1/Rnf10/Cers2/Ski/Anxa7/Dbi/Mfn2/Rb1/Prkci/Nfix/Myb/Csf1	13
BP	GO:0016239	positive regulation of macroautophagy	13/2090	79/28891	0.00421391	0.0286203	0.0210592	Larp1/Htt/Supt5/Pip4k2b/Tsc2/Ambra1/Vps13d/Sptlc2/Atg2a/Clec16a/Gpsm1/Fyco1/Wdr45	13
BP	GO:0061180	mammary gland epithelium development	13/2090	79/28891	0.00421391	0.0286203	0.0210592	Phb2/Mapk1/Stat6/Tgfb1/Scrib/Med1/Orai1/Brca2/Nr3c1/Lrp5/Btrc/Csf1/Zfp703	13
BP	GO:0006906	vesicle fusion	18/2090	126/28891	0.00422761	0.02868	0.0211032	Rab8b/Rab7/Rab8a/Pip4k2b/Slamf1/Sec22b/Stx16/Chmp5/Tgfbrap1/Vps8/Vamp4/Atp13a2/Chmp6/Snap47/Vav3/Stx8/Bet1/Grik5	18
BP	GO:0001881	receptor recycling	10/2090	53/28891	0.0042482	0.0287196	0.0211323	Ide/Scrib/Ptpn2/Rab11b/Nsf/Lmtk2/Pex6/Chmp5/Ehd3/Tbc1d16	10
BP	GO:0009161	ribonucleoside monophosphate metabolic process	10/2090	53/28891	0.0042482	0.0287196	0.0211323	Cad/Paics/Gart/Atic/Pfas/Aprt/Prps2/Impdh1/Rfk/Uck1	10
BP	GO:0046148	pigment biosynthetic process	10/2090	53/28891	0.0042482	0.0287196	0.0211323	Slc25a39/Ireb2/Myo5a/Alad/Gipc1/Fech/Slc6a9/Atp7a/Slc7a11/Opn3	10
BP	GO:0007623	circadian rhythm	28/2090	228/28891	0.00426418	0.0287943	0.0211873	Mybbp1a/Sfpq/Huwe1/Atf4/Thrap3/Ppp1ca/Parp1/Ogt/Mycbp2/Mta1/Csnk1d/Kmt2a/Fxr1/Gfpt1/Hdac3/Pspc1/Suv39h1/Rai1/Pten/Ptger4/Kat5/Mettl3/Csnk1e/Btbd9/Crtc1/Btrc/Cry2/Rbm4	28
BP	GO:0000132	establishment of mitotic spindle orientation	8/2090	37/28891	0.00429922	0.0288796	0.02125	Numa1/Htt/Hdac3/Dctn1/Spry1/Kat5/Gpsm1/Spry2	8
BP	GO:0033146	regulation of intracellular estrogen receptor signaling pathway	8/2090	37/28891	0.00429922	0.0288796	0.02125	Phb2/Parp1/Med1/Carm1/Ufm1/Uba5/Ufsp2/Vps18	8
BP	GO:0061384	heart trabecula morphogenesis	8/2090	37/28891	0.00429922	0.0288796	0.02125	Fkbp1a/Smarca4/Notch1/Nfatc1/Med1/Heg1/Srf/Tgfbr3	8
BP	GO:1903715	regulation of aerobic respiration	8/2090	37/28891	0.00429922	0.0288796	0.02125	Shmt2/Ide/Akt1/Ppif/Cox7a2l/Tmem135/Abcd1/Atp7a	8
BP	GO:0046467	membrane lipid biosynthetic process	19/2090	136/28891	0.00430247	0.0288796	0.02125	B4galnt1/St6galnac4/Cers2/Abca2/Pigt/Pigq/Gpaa1/Pigs/Sptlc2/Pign/Elovl6/Hacd2/Ormdl2/Cers6/Pigl/Pigyl/Pgap3/B4galt4/Elovl7	19
BP	GO:1901136	carbohydrate derivative catabolic process	22/2090	166/28891	0.00430648	0.0288796	0.02125	Cd44/Tgfb1/Man1a2/Man1b1/Nudt3/Pank4/Dnph1/Gba2/Entpd5/Ids/Hgsnat/Cdadc1/Adal/Abcd1/Idua/Gpc1/Gla/Nudt16/Arsb/Ctsl/Ctbs/Fbxo17	22
BP	GO:1904375	regulation of protein localization to cell periphery	21/2090	156/28891	0.00433576	0.0290426	0.02137	Eif4g1/Wnk1/Csk/Ogt/Ezr/Akt1/Bcl2l1/Numa1/Tgfb1/Abca2/Rhog/Ppp1r9b/Myo5a/Dlg1/Zdhhc7/Prkci/Vamp4/Neto2/Stx8/Rab11fip2/Itga3	21
BP	GO:0016055	Wnt signaling pathway	49/2090	460/28891	0.00434322	0.0290593	0.0213823	G3bp1/Wnk1/Smarca4/Ctnnb1/Rapgef1/Cd44/Notch1/Tgfb1/Cul3/Csnk1d/Med12/Mapk14/Mark2/Xiap/Emd/Axin1/Ctr9/Abl1/Gsk3a/Cdc73/Spin1/Fam53b/Tsc2/Pten/Apc/Foxo3/Rnf14/Sdhaf2/Pkd1/Leo1/Celsr1/Tmem64/Nxn/Tiam1/Csnk1e/Lmbr1l/Lrp5/Cmah/Btrc/Tmem237/Zfp703/Mks1/Wnt10b/Nphp4/Wwox/Itga3/Sdc1/Ctnnbip1/Vangl2	49
BP	GO:1903046	meiotic cell cycle process	29/2090	239/28891	0.00437022	0.0290923	0.0214065	Myh9/Actr2/Mcm2/Bag6/Eif4g3/Ehmt2/Cdc25a/Hsf1/Spin1/Pten/Brca2/Bcl2l11/Chtf18/Mlh1/Slx4/Brip1/Golga2/Syce2/Cep63/Rad51d/Haspin/Mastl/Ercc4/Spire1/Foxj2/Mybl1/Rad51c/Msh5/Mei4	29
BP	GO:1900087	positive regulation of G1/S transition of mitotic cell cycle	9/2090	45/28891	0.00437732	0.0290923	0.0214065	Eif4g1/Ankrd17/Akt1/Mdm2/Mepce/Mtbp/Crebbp/Rptor/Lsm11	9
BP	GO:0000097	sulfur amino acid biosynthetic process	5/2090	16/28891	0.00438302	0.0290923	0.0214065	Mthfd1/Mri1/Mtrr/Enoph1/Apip	5
BP	GO:0031054	pre-miRNA processing	5/2090	16/28891	0.00438302	0.0290923	0.0214065	Ago2/Drosha/Dgcr8/Ago1/Tut7	5
BP	GO:0032511	late endosome to vacuole transport via multivesicular body sorting pathway	5/2090	16/28891	0.00438302	0.0290923	0.0214065	Leprotl1/Chmp5/Vta1/Chmp6/Leprot	5
BP	GO:0034497	protein localization to phagophore assembly site	5/2090	16/28891	0.00438302	0.0290923	0.0214065	Wipi2/Mfn2/Pacs2/Atg9b/Wdr45	5
BP	GO:0042640	anagen	5/2090	16/28891	0.00438302	0.0290923	0.0214065	Ctnnb1/Akt1/Notch1/Myo5a/Wnt10b	5
BP	GO:0002263	cell activation involved in immune response	38/2090	337/28891	0.00444873	0.0294949	0.0217028	Lcp1/Lat/Ndfip1/Nr4a3/Nsd2/Stat6/Msh6/Tgfb1/Kmt2a/Ptk2b/Paxip1/Ly9/Ap1g1/Notch2/Unc13d/Abl1/Slamf1/Gbf1/Lfng/Apbb1ip/Mlh1/Ptger4/Rnf168/Rc3h2/Bcr/Zc3h12a/Myb/Ticam1/Shld2/Cracr2a/Lig4/Rnf8/Bcl6/Atp7a/Il18r1/Slc18a2/Gata1/Fes	38
BP	GO:0006970	response to osmotic stress	15/2090	98/28891	0.00449403	0.0296942	0.0218494	Ybx3/Wnk1/Usp15/Ptk2b/Letm1/Vac14/Anxa7/Stk39/Pkn1/Rptor/Lrrc8c/Tsc22d2/Lrrc8d/Mknk1/Micu1	15
BP	GO:0019319	hexose biosynthetic process	15/2090	98/28891	0.00449403	0.0296942	0.0218494	Atf4/Mdh2/Ogt/Got1/Ptpn2/Kat2a/Arpp19/Gpd2/Prkaca/Nr3c1/Acadm/Gpt2/Dgkq/Gpt/Sord	15
BP	GO:0061515	myeloid cell development	15/2090	98/28891	0.00449403	0.0296942	0.0218494	Pabpc4/Flna/Ptbp3/Wasf2/Med1/Zfpm1/Srf/Notch2/Nbeal2/Jmjd6/Sh2b3/Arid4a/Myb/Bcl6/Gata1	15
BP	GO:0031098	stress-activated protein kinase signaling cascade	31/2090	261/28891	0.0045306	0.029902	0.0220023	Lmnb1/Dnaja1/Mapk1/Ezr/Rapgef1/Akt1/Hipk3/Ptk2b/Cdc42se1/Map2k2/Irak1/Mapk14/Mapk8ip3/Hdac3/Map2k3/Axin1/Slamf1/Stk39/Map3k11/Crk/Dlg1/Ptger4/Pja2/Nr2c2/Zc3h12a/Mapk11/Irak4/Cracr2a/Unc5cl/Ager/Rell2	31
BP	GO:0009952	anterior/posterior pattern specification	29/2090	240/28891	0.0046362	0.0305644	0.0224897	Ctnnb1/Notch1/Htt/Yy1/Kmt2a/Hipk1/Med12/Kdm2b/Srf/Ski/Kat2a/Crkl/Grsf1/Lfng/Mib1/Smad2/Apc/Celsr1/Tshz1/Ssbp3/Cdon/Lrp5/Ring1/Scmh1/Rarg/Acvr2a/Ctnnbip1/Arc/Vangl2	29
BP	GO:0002768	immune response-regulating cell surface receptor signaling pathway	34/2090	294/28891	0.0046601	0.0306491	0.022552	Wnk1/Mapk1/Khdrbs1/Csk/Lat/Ezr/Nr4a3/Bag6/Rapgef1/Dgkz/Cblb/Eif2b5/Irak1/Ptpn2/Ctla4/Plscr1/Crkl/Abl1/Prkd2/Usp12/Pten/Rc3h2/Pja2/Card11/Tnip2/Vav3/Zc3h12a/Lipa/Tnfrsf21/Txk/Sla2/Rab11fip2/Cmtm3/Ticam2	34
BP	GO:0003007	heart morphogenesis	34/2090	294/28891	0.0046601	0.0306491	0.022552	Flna/Fkbp1a/Nsd2/Smarca4/Ctnnb1/Notch1/Nfatc1/Tgfb1/Pbrm1/Med1/Heg1/Kat6a/Ncor2/Mdm2/Zfpm1/Srf/Notch2/Rbm15/Gng5/Crkl/Gsk3a/Ptcd2/Mib1/Smad2/Spry1/Fkrp/Gaa/Sufu/Ift52/Tgfbr3/Adam15/Mks1/Vangl2/Fgfrl1	34
BP	GO:0008286	insulin receptor signaling pathway	19/2090	137/28891	0.00466479	0.0306491	0.022552	Ide/Mapk1/Ogt/Smarcc1/Eif4ebp2/Akt1/Ptpn2/Eif4ebp1/Pip4k2b/Zfp592/Gsk3a/Mfn2/Tsc2/Apc/Ankrd26/Sik2/Slc2a8/Rbm4/Fut7	19
BP	GO:0010921	regulation of phosphatase activity	13/2090	80/28891	0.00470573	0.0308487	0.0226989	Hsp90b1/Calm3/Htt/Ptpa/Ppp1r12a/Ikbkb/Uri1/Mprip/Ppp1r9b/Mtmr9/Mgat5/Mastl/Cry2	13
BP	GO:0042306	regulation of protein import into nucleus	13/2090	80/28891	0.00470573	0.0308487	0.0226989	Trim28/Flna/Tpr/Mapk1/Tgfb1/Mapk14/Hdac3/Rbm22/Ei24/Ufm1/Akap1/Zc3h12a/Rab23	13
BP	GO:0198738	cell-cell signaling by wnt	49/2090	462/28891	0.00471866	0.0308987	0.0227358	G3bp1/Wnk1/Smarca4/Ctnnb1/Rapgef1/Cd44/Notch1/Tgfb1/Cul3/Csnk1d/Med12/Mapk14/Mark2/Xiap/Emd/Axin1/Ctr9/Abl1/Gsk3a/Cdc73/Spin1/Fam53b/Tsc2/Pten/Apc/Foxo3/Rnf14/Sdhaf2/Pkd1/Leo1/Celsr1/Tmem64/Nxn/Tiam1/Csnk1e/Lmbr1l/Lrp5/Cmah/Btrc/Tmem237/Zfp703/Mks1/Wnt10b/Nphp4/Wwox/Itga3/Sdc1/Ctnnbip1/Vangl2	49
BP	GO:0019751	polyol metabolic process	16/2090	108/28891	0.00473137	0.0309473	0.0227715	Myh9/Isyna1/Ptk2b/Got1/Abca2/Sgpp1/Nudt3/Pten/Slc5a3/Fkrp/Spr/Ipmk/Sptlc2/Ppip5k1/Gk5/Sord	16
BP	GO:0010971	positive regulation of G2/M transition of mitotic cell cycle	7/2090	30/28891	0.00476056	0.0309993	0.0228098	Rcc2/Lmnb1/Brd4/Cdc25a/Cdc7/Wnt10b/Rad51c	7
BP	GO:0030511	positive regulation of transforming growth factor beta receptor signaling pathway	7/2090	30/28891	0.00476056	0.0309993	0.0228098	Got1/Axin1/Snw1/Crebbp/Flcn/Gipc1/Tgfbr3	7
BP	GO:0043247	telomere maintenance in response to DNA damage	7/2090	30/28891	0.00476056	0.0309993	0.0228098	Yy1/Uchl5/Actl6a/Mcrs1/Ino80/Ercc4/Shld2	7
BP	GO:1903846	positive regulation of cellular response to transforming growth factor beta stimulus	7/2090	30/28891	0.00476056	0.0309993	0.0228098	Got1/Axin1/Snw1/Crebbp/Flcn/Gipc1/Tgfbr3	7
BP	GO:0051321	meiotic cell cycle	39/2090	350/28891	0.00488028	0.0315823	0.0232387	Myh9/Actr2/Mcm2/Bag6/Eif4g3/Ehmt2/Cdc25a/Klhdc3/Lfng/Xrn1/Rbbp8/Hsf1/Spin1/Pten/Brca2/Prkaca/Bcl2l11/Chtf18/Mlh1/Tubgcp6/Slx4/Brip1/Golga2/Mettl3/Nr2c2/Syce2/Zfp318/Cep63/Rad51d/Haspin/Mastl/Ercc4/Spire1/Foxj2/Zfp386/Mybl1/Rad51c/Msh5/Mei4	39
BP	GO:0010823	negative regulation of mitochondrion organization	10/2090	54/28891	0.00488252	0.0315823	0.0232387	Huwe1/Ghitm/Akt1/Bcl2l1/Ppif/Mfn2/Flcn/Rnf41/Clec16a/Oma1	10
BP	GO:0035088	establishment or maintenance of apical/basal cell polarity	10/2090	54/28891	0.00488252	0.0315823	0.0232387	Msn/Ezr/Pdcd6ip/Scrib/Mark2/Dlg1/Llgl1/Prkci/Vangl2/Syne4	10
BP	GO:0051289	protein homotetramerization	10/2090	54/28891	0.00488252	0.0315823	0.0232387	Shmt2/Vasp/Acaca/Evl/Golga2/Osbpl2/Crtc3/Crtc1/Cbr4/Apip	10
BP	GO:0061245	establishment or maintenance of bipolar cell polarity	10/2090	54/28891	0.00488252	0.0315823	0.0232387	Msn/Ezr/Pdcd6ip/Scrib/Mark2/Dlg1/Llgl1/Prkci/Vangl2/Syne4	10
BP	GO:1990928	response to amino acid starvation	10/2090	54/28891	0.00488252	0.0315823	0.0232387	Larp1/Atf4/Mapk1/Eif2a/Eif4ebp1/Cdkn1a/Flcn/Impact/Dapl1/Gpr155	10
BP	GO:0106027	neuron projection organization	17/2090	118/28891	0.00489682	0.0316397	0.023281	Actr2/Dbnl/Dctn1/Prmt3/Mfn2/Pten/Mtmr2/Tiam1/Pdlim5/Hdac6/Wasl/Abcd1/Zfp365/Afdn/Itga3/Arc/Cttn	17
BP	GO:0060253	negative regulation of glial cell proliferation	6/2090	23/28891	0.00491773	0.0316531	0.0232908	Notch1/Rnf10/Cers2/Ski/Mfn2/Rb1	6
BP	GO:0070861	regulation of protein exit from endoplasmic reticulum	6/2090	23/28891	0.00491773	0.0316531	0.0232908	Sar1a/Bcap31/Ube2j1/Os9/Derl2/Erlec1	6
BP	GO:0071218	cellular response to misfolded protein	6/2090	23/28891	0.00491773	0.0316531	0.0232908	Bag6/Cul3/Aup1/Dnajb12/Hdac6/Ube2w	6
BP	GO:0010631	epithelial cell migration	37/2090	328/28891	0.00492057	0.0316531	0.0232908	Myh9/Actn4/Akt1/Ptp4a3/Notch1/Coro1c/Tgfb1/Ptk2b/Paxip1/Evl/Emc10/Srf/Coro1b/Clasp1/Map2k3/Pdcd6/Abl1/Prkd2/Pkn1/Mia3/Pten/Apc/Patz1/Gipc1/Pik3c2a/Hdac6/Hdac5/Tgfbr3/Zc3h12a/Plk2/Tesk1/Insl3/Arsb/Itga3/Serpinf1/Ager/Pfn2	37
BP	GO:0071674	mononuclear cell migration	25/2090	199/28891	0.00498561	0.0320362	0.0235727	Msn/C1qbp/Wnk1/Mapk1/Akt1/Myo9b/Tgfb1/Dock8/Ptk2b/Stk10/Crkl/Abl1/Slamf1/Stk39/Itgb7/Crk/Mia3/Selenok/Tnfrsf14/Wasl/Fadd/Creb3/Csf1/Fut7/Ager	25
BP	GO:0090174	organelle membrane fusion	18/2090	128/28891	0.0050005	0.0320966	0.0236172	Rab8b/Rab7/Rab8a/Pip4k2b/Slamf1/Sec22b/Stx16/Chmp5/Tgfbrap1/Vps8/Vamp4/Atp13a2/Chmp6/Snap47/Vav3/Stx8/Bet1/Grik5	18
BP	GO:0022612	gland morphogenesis	21/2090	158/28891	0.00503078	0.0322555	0.0237341	Msn/Phb2/Cd44/Stat6/Notch1/Tgfb1/Cul3/Scrib/Med1/Rps6ka1/Notch2/Capn1/Nr3c1/Tet2/Lrp5/Plxna1/Btrc/Lipa/Csf1/Zfp157/Rarg	21
BP	GO:0045137	development of primary sexual characteristics	31/2090	263/28891	0.00506577	0.0324443	0.023873	Myh9/Ybx3/Flna/Bcl2l1/Nefh/Eif2b5/Safb2/Crkl/Dhx37/Jmjd1c/Lfng/Mfn2/Patz1/Foxo3/Brca2/Zfx/Bcl2l11/Arid4a/Brip1/Taf4/Ptger4/Hsd17b4/Fndc3a/Arid4b/Ermp1/Fancg/Cbx2/Insl3/Insl6/Acvr2a/Gata1	31
BP	GO:0048854	brain morphogenesis	9/2090	46/28891	0.00509952	0.032589	0.0239794	Uchl5/Pcnt/Pten/Foxo3/Zfp335/Nfix/Fancc/Afdn/Bbs2	9
BP	GO:0098534	centriole assembly	9/2090	46/28891	0.00509952	0.032589	0.0239794	Rbm14/Kat2a/Cep76/Cep63/Poc1b/Cep44/Alms1/Plk2/Cetn4	9
BP	GO:0031641	regulation of myelination	11/2090	63/28891	0.0051609	0.0329452	0.0242415	Ctnnb1/Akt1/Rnf10/Ctsc/Cst7/Tnfrsf1b/Dlg1/Pten/Mtmr2/Tnfrsf21/Rarg	11
BP	GO:0046364	monosaccharide biosynthetic process	16/2090	109/28891	0.00518198	0.0330436	0.024314	Atf4/Mdh2/Ogt/Got1/Ptpn2/Kat2a/Arpp19/Gpd2/Prkaca/Nr3c1/Acadm/Gpt2/Dgkq/Gpt/Sord/Chst14	16
BP	GO:0031397	negative regulation of protein ubiquitination	13/2090	81/28891	0.00524264	0.0332489	0.024465	U2af2/Dnaja1/Wnk1/Ogt/Akt1/Ubxn1/Prmt3/Abl1/Nxn/Cep63/Limk1/Hdac8/Spry2	13
BP	GO:0042130	negative regulation of T cell proliferation	13/2090	81/28891	0.00524264	0.0332489	0.024465	Prkar1a/Ndfip1/Cd44/Cblb/Tgfb1/Zc3h12d/Scrib/Ctla4/Tsc2/Dlg1/Pten/Tnfrsf14/Tnfrsf21	13
BP	GO:0043154	negative regulation of cysteine-type endopeptidase activity involved in apoptotic process	13/2090	81/28891	0.00524264	0.0332489	0.024465	Pak2/Cd44/Akt1/Ints1/Dhcr24/Dnajb6/Rps6ka1/Rps6ka3/Mdm2/Xiap/Herpud1/Por/Caap1	13
BP	GO:0045453	bone resorption	13/2090	81/28891	0.00524264	0.0332489	0.024465	Csk/Ctnnb1/Rab7/Ptk2b/Ncdn/Tcirg1/Ptger4/Tmem64/Def8/Idua/Gpr137/Gpr55/Rab3d	13
BP	GO:0140056	organelle localization by membrane tethering	13/2090	81/28891	0.00524264	0.0332489	0.024465	Rab8b/Atp2a2/Ahcyl1/Rab8a/Esyt2/Exoc6/Stx16/Pacs2/Stxbp3/Exoc8/Stx8/Vps18/Rab3d	13
BP	GO:0048332	mesoderm morphogenesis	12/2090	72/28891	0.00526571	0.0333229	0.0245195	Prkar1a/Txnrd1/Nr4a3/Htt/Srf/Axin1/Smad2/Prkaca/Ext2/Armc5/Pofut2/Ahdc1	12
BP	GO:1903051	negative regulation of proteolysis involved in protein catabolic process	12/2090	72/28891	0.00526571	0.0333229	0.0245195	Ogt/Smarcc1/Bag6/Usp19/Uchl5/Ubxn1/Tlk2/Psmf1/Alad/Sufu/Gipc1/Clec16a	12
BP	GO:0032006	regulation of TOR signaling	21/2090	159/28891	0.00541136	0.0341739	0.0251457	Akt1/Cul3/Sec13/Rps6ka1/Rbx1/Hdac3/Pdcd6/Rheb/Gsk3a/Tti1/Tsc2/Rptor/Prkaca/Flcn/Akt1s1/Clec16a/Ube2w/Dgkq/Dyrk3/Gpr137/Gpr155	21
BP	GO:0090132	epithelium migration	37/2090	330/28891	0.00542595	0.0341739	0.0251457	Myh9/Actn4/Akt1/Ptp4a3/Notch1/Coro1c/Tgfb1/Ptk2b/Paxip1/Evl/Emc10/Srf/Coro1b/Clasp1/Map2k3/Pdcd6/Abl1/Prkd2/Pkn1/Mia3/Pten/Apc/Patz1/Gipc1/Pik3c2a/Hdac6/Hdac5/Tgfbr3/Zc3h12a/Plk2/Tesk1/Insl3/Arsb/Itga3/Serpinf1/Ager/Pfn2	37
BP	GO:0003279	cardiac septum development	18/2090	129/28891	0.00542828	0.0341739	0.0251457	Nsd2/Smarca4/Notch1/Nfatc1/Ap2b1/Heg1/Mdm2/Zfpm1/Notch2/Rbm15/Sufu/Ndst1/Luzp1/Tgfbr3/Cplane1/Mks1/Vangl2/Fgfrl1	18
BP	GO:0048640	negative regulation of developmental growth	18/2090	129/28891	0.00542828	0.0341739	0.0251457	Yy1/Ifrd1/Rai1/Cdkn1a/Gsk3a/Spag9/Pten/Apc/Dip2b/Ctdp1/Gnas/Jarid2/Atxn2/Ankrd26/Mapk11/Alms1/Bbs2/Stc2	18
BP	GO:0050670	regulation of lymphocyte proliferation	33/2090	286/28891	0.00542944	0.0341739	0.0251457	Prkar1a/Ndfip1/Tnfrsf4/Ctnnb1/Cd44/Il12rb1/Cblb/Tgfb1/Zc3h12d/Scrib/Ctla4/Cdkn1a/Slamf1/Tnfrsf1b/Pkn1/Tsc2/Dlg1/Pten/Tyk2/Selenok/Card11/Zfp335/Znhit1/Vav3/Tnfrsf14/Fadd/Gpam/Ticam1/Tnfrsf21/Bcl6/Ager/Efnb1/Cd1d1	33
BP	GO:0034599	cellular response to oxidative stress	29/2090	243/28891	0.00551706	0.034688	0.0255239	Atf4/Atp2a2/Mapk1/Parp1/Akt1/Stat6/Ppif/Pnpt1/Abl1/Capn1/Trp53inp1/Hsf1/Agap3/Foxo3/Selenos/Ermp1/Arnt/Atp13a2/Hdac6/Nr4a2/Zc3h12a/Rad52/Fancc/Abcd1/Mpv17/Atp7a/Selenon/Slc7a11/Srxn1	29
BP	GO:0043242	negative regulation of protein-containing complex disassembly	14/2090	91/28891	0.00566676	0.0355909	0.0261883	Capzb/Sptan1/Mtpn/Ubqln4/Evl/Scaf4/Clasp1/Apc/Specc1l/Hdgfl3/Camsap1/Hdac6/Clec16a/Wdr47	14
BP	GO:0007611	learning or memory	37/2090	331/28891	0.00569463	0.0357276	0.0262889	Eif4ebp2/Htt/Kmt2a/Ehmt2/Vdac3/Nptn/Srf/Git1/Paip2/Kat2a/Abl1/Ncstn/Ric8a/Dbi/Pten/Crebbp/Pja2/Synj1/Ntan1/Btbd9/Atp8a1/Nr4a2/Crtc1/Klk8/Adcy3/Nfix/Plk2/Fen1/Idua/Itga3/Peg13/Prkar2b/Slc7a11/Hrh2/Arc/Serpinf1/Ager	37
BP	GO:0001832	blastocyst growth	7/2090	31/28891	0.00577162	0.0359293	0.0264373	Smarca4/Brd4/Ints1/Ctr9/Brca2/Gins4/Pelo	7
BP	GO:0006536	glutamate metabolic process	7/2090	31/28891	0.00577162	0.0359293	0.0264373	Got1/Apc/Gclm/Dglucy/Gls2/Aldh4a1/Slc7a11	7
BP	GO:0010800	positive regulation of peptidyl-threonine phosphorylation	7/2090	31/28891	0.00577162	0.0359293	0.0264373	Mapk1/Tgfb1/Ube2k/Axin1/Gsk3a/Rptor/Prkag2	7
BP	GO:0032509	endosome transport via multivesicular body sorting pathway	7/2090	31/28891	0.00577162	0.0359293	0.0264373	Leprotl1/Lyst/Mvb12a/Chmp5/Vta1/Chmp6/Leprot	7
BP	GO:0010171	body morphogenesis	11/2090	64/28891	0.00583371	0.0359293	0.0264373	Tgfb1/Gatad2a/Kat6a/Clasp1/Ski/Crebbp/Gnas/Specc1l/Ssbp3/Cdon/Phldb1	11
BP	GO:0120032	regulation of plasma membrane bounded cell projection assembly	26/2090	212/28891	0.00583377	0.0359293	0.0264373	Rcc2/Actr2/Capzb/Akt1/Htt/Coro1c/Wasf2/Evl/Fmr1/Fxr1/Srf/Rhog/Was/Atmin/Apc/Def8/Arhgap35/Rab11fip3/Cdk10/Wasl/Mien1/Tesk1/Tbc1d30/Atp7a/Cdc42ep3/Pfn2	26
BP	GO:1905475	regulation of protein localization to membrane	26/2090	212/28891	0.00583377	0.0359293	0.0264373	Wnk1/Csk/Ogt/Ezr/Akt1/Bcl2l1/Ap2b1/Tgfb1/Rhog/Gdi1/Snx27/Crkl/Ppp1r9b/Myo5a/Dlg1/Slc5a3/Zdhhc7/Prkci/Vamp4/Neto2/Bbc3/Stx8/Gpc1/Rab11fip2/Itga3/Slc7a11	26
BP	GO:0042552	myelination	24/2090	191/28891	0.00583547	0.0359293	0.0264373	Mapk1/Ctnnb1/Akt1/Rnf10/Tgfb1/Eif2b5/Map2k2/Abca2/Ctsc/Ski/Cst7/Tnfrsf1b/Myo5a/Ncstn/Dlg1/Pten/Mtmr2/Pomgnt1/Cd9/Abcd1/Tnfrsf21/Gpc1/Rarg/Amigo1	24
BP	GO:0001833	inner cell mass cell proliferation	5/2090	17/28891	0.00584367	0.0359293	0.0264373	Brd4/Ints1/Brca2/Gins4/Pelo	5
BP	GO:0002431	Fc receptor mediated stimulatory signaling pathway	5/2090	17/28891	0.00584367	0.0359293	0.0264373	Csk/Nr4a3/Rapgef1/Plscr1/Pten	5
BP	GO:0006337	nucleosome disassembly	5/2090	17/28891	0.00584367	0.0359293	0.0264373	Smarcc1/Smarca4/Arid1a/Smarcc2/Smarcd1	5
BP	GO:0007063	regulation of sister chromatid cohesion	5/2090	17/28891	0.00584367	0.0359293	0.0264373	Sfpq/Rad21/Ctnnb1/Nsmce2/Fen1	5
BP	GO:0043923	positive regulation by host of viral transcription	5/2090	17/28891	0.00584367	0.0359293	0.0264373	Smarca4/Rrp1b/Snw1/Zfp639/Ctdp1	5
BP	GO:0046653	tetrahydrofolate metabolic process	5/2090	17/28891	0.00584367	0.0359293	0.0264373	Shmt2/Gart/Atic/Mthfd1/Mthfd1l	5
BP	GO:0060148	positive regulation of post-transcriptional gene silencing	5/2090	17/28891	0.00584367	0.0359293	0.0264373	Tgfb1/Fmr1/Fxr1/Pum1/Dgcr8	5
BP	GO:0060947	cardiac vascular smooth muscle cell differentiation	5/2090	17/28891	0.00584367	0.0359293	0.0264373	Ctnnb1/Notch1/Pbrm1/Srf/Vangl2	5
BP	GO:0071025	RNA surveillance	5/2090	17/28891	0.00584367	0.0359293	0.0264373	Exosc10/Trnt1/Xrn1/Zcchc7/Pelo	5
BP	GO:1900370	positive regulation of post-transcriptional gene silencing by RNA	5/2090	17/28891	0.00584367	0.0359293	0.0264373	Tgfb1/Fmr1/Fxr1/Pum1/Dgcr8	5
BP	GO:2000637	positive regulation of miRNA-mediated gene silencing	5/2090	17/28891	0.00584367	0.0359293	0.0264373	Tgfb1/Fmr1/Fxr1/Pum1/Dgcr8	5
BP	GO:0090316	positive regulation of intracellular protein transport	20/2090	150/28891	0.00587905	0.035952	0.026454	Ywhae/Trim28/Flna/Tpr/Mapk1/Tgfb1/Sar1a/Mapk14/Bcap31/Mdm2/Pcnt/Ice1/Hdac3/Emd/Rbm22/Gsk3a/Prkaca/Zc3h12a/Bbc3/Cep131	20
BP	GO:0034340	response to type I interferon	12/2090	73/28891	0.00589631	0.035952	0.026454	Shmt2/Irak1/Ptpn2/Cactin/Ube2k/Ttll12/Ikbke/Tyk2/Mettl3/Trim41/Fadd/Trim65	12
BP	GO:0070936	protein K48-linked ubiquitination	12/2090	73/28891	0.00589631	0.035952	0.026454	Rnf187/Cul3/Rbx1/Znrf2/Ube2k/Gabarap/Bfar/Ube2a/Rnf216/Ube2t/Btrc/Rnf8	12
BP	GO:1902373	negative regulation of mRNA catabolic process	12/2090	73/28891	0.00589631	0.035952	0.026454	Hnrnpab/Ptbp1/Hnrnpa0/Larp1/Hnrnpc/Thrap3/Eif4enif1/Rbm38/Fmr1/Angel2/Ikbke/Dhx34	12
BP	GO:0003382	epithelial cell morphogenesis	9/2090	47/28891	0.00591069	0.035952	0.026454	Scrib/Sipa1/Bcl11b/Heg1/Flnb/Jmjd1c/Sipa1l3/Hrh2/Rilpl1	9
BP	GO:0030490	maturation of SSU-rRNA	9/2090	47/28891	0.00591069	0.035952	0.026454	Rps16/Nat10/Rrs1/Wdr46/Bysl/Dhx37/Riok1/Ngdn/Tsr3	9
BP	GO:0046636	negative regulation of alpha-beta T cell activation	9/2090	47/28891	0.00591069	0.035952	0.026454	Ndfip1/Cbfb/Cd44/Cblb/Rc3h2/Dapl1/Tnfrsf14/Zc3h12a/Bcl6	9
BP	GO:0120163	negative regulation of cold-induced thermogenesis	9/2090	47/28891	0.00591069	0.035952	0.026454	Atf4/Notch1/Lnpep/Rheb/Rb1/Flcn/Tfe3/Wnt10b/Il18r1	9
BP	GO:0071900	regulation of protein serine/threonine kinase activity	38/2090	343/28891	0.0059354	0.035952	0.026454	Prkar1a/Ccng1/Dnaja1/Csk/Akt1/Htt/Tgfb1/Hipk3/Ptk2b/Map2k2/Heg1/Irak1/Mapk8ip3/Cdkn1a/Prkar2a/Axin1/Erp29/Fem1a/Hexim1/Abl1/Map3k11/Tsc2/Pten/Apc/Rptor/Spry1/Pkd1/Rb1/Psrc1/Dusp7/Tiam1/Fbxo7/Cdkn2c/Tesk1/Prkar2b/Vangl2/Spry2/Ager	38
BP	GO:0003266	regulation of secondary heart field cardioblast proliferation	4/2090	11/28891	0.00596257	0.035952	0.026454	Ctnnb1/Notch1/Gng5/Mks1	4
BP	GO:0006013	mannose metabolic process	4/2090	11/28891	0.00596257	0.035952	0.026454	Man2a1/Man2c1/Man2b2/Pmm1	4
BP	GO:0031642	negative regulation of myelination	4/2090	11/28891	0.00596257	0.035952	0.026454	Ctsc/Pten/Mtmr2/Tnfrsf21	4
BP	GO:0045603	positive regulation of endothelial cell differentiation	4/2090	11/28891	0.00596257	0.035952	0.026454	Btg1/Ctnnb1/Notch1/Vezf1	4
BP	GO:0046834	lipid phosphorylation	4/2090	11/28891	0.00596257	0.035952	0.026454	Dgkz/Dgkd/Dgke/Dgkq	4
BP	GO:0050655	dermatan sulfate proteoglycan metabolic process	4/2090	11/28891	0.00596257	0.035952	0.026454	Ids/Idua/Arsb/Chst14	4
BP	GO:0060717	chorion development	4/2090	11/28891	0.00596257	0.035952	0.026454	Paxip1/Dnajb6/E2f8/E2f7	4
BP	GO:0071044	histone mRNA catabolic process	4/2090	11/28891	0.00596257	0.035952	0.026454	Exosc10/Upf1/Xrn1/Lsm1	4
BP	GO:0075522	IRES-dependent viral translational initiation	4/2090	11/28891	0.00596257	0.035952	0.026454	Ptbp1/Eif3b/Pcbp2/Eif3f	4
BP	GO:0016485	protein processing	31/2090	266/28891	0.00596745	0.035952	0.026454	Myh9/Hsp90b1/Srgn/Parp1/Ogt/Spcs2/Dhcr24/Fmr1/Pmpca/Mdm2/Afg3l1/Sec11a/Xiap/Cst7/Ddi2/Capn1/Ncstn/Sec11c/Prkaca/Tysnd1/Eno1b/Fkrp/Ift52/Tmem208/Oma1/Fadd/Chac1/Disp1/Perp/Bmp1/Ctse	31
BP	GO:0090130	tissue migration	37/2090	332/28891	0.00597443	0.035952	0.026454	Myh9/Actn4/Akt1/Ptp4a3/Notch1/Coro1c/Tgfb1/Ptk2b/Paxip1/Evl/Emc10/Srf/Coro1b/Clasp1/Map2k3/Pdcd6/Abl1/Prkd2/Pkn1/Mia3/Pten/Apc/Patz1/Gipc1/Pik3c2a/Hdac6/Hdac5/Tgfbr3/Zc3h12a/Plk2/Tesk1/Insl3/Arsb/Itga3/Serpinf1/Ager/Pfn2	37
BP	GO:0007229	integrin-mediated signaling pathway	15/2090	101/28891	0.00597661	0.035952	0.026454	Rcc2/Flna/Tln1/Lat/Cul3/Ptk2b/Vav1/Abl1/Itgb7/Zyx/Arhgap35/Vav3/Adam15/Txk/Itga3	15
BP	GO:0046394	carboxylic acid biosynthetic process	36/2090	321/28891	0.00600399	0.0360563	0.0265308	Fasn/Shmt2/Cad/Mthfd1/Ubr4/Mthfd1l/Htt/Acaca/Got1/Lta4h/Fabp5/Psph/Scap/Prmt3/Myo5a/Abhd2/Mri1/Mtrr/Bcat2/Elovl6/Enoph1/Mcat/Prkag2/Hacd2/Prkag1/Klhl25/Cbr4/Apip/Abcd1/Daglb/Gls2/Prkab2/Acss1/Star/Chst14/Elovl7	36
BP	GO:0031114	regulation of microtubule depolymerization	8/2090	39/28891	0.00602482	0.0360563	0.0265308	Clasp1/Map1s/Apc/Specc1l/Hdgfl3/Camsap1/Hdac6/Wdr47	8
BP	GO:0032438	melanosome organization	8/2090	39/28891	0.00602482	0.0360563	0.0265308	Ap1g1/Ap1m1/Ap1b1/Ap3b1/Lyst/Hps3/Bloc1s4/Hps6	8
BP	GO:0060292	long-term synaptic depression	8/2090	39/28891	0.00602482	0.0360563	0.0265308	Bcl2l1/Ptk2b/Fmr1/Srf/Pten/Plk2/Arc/Ager	8
BP	GO:0060674	placenta blood vessel development	8/2090	39/28891	0.00602482	0.0360563	0.0265308	Mapk1/Akt1/Arid1a/Ggnbp2/Notch2/Rbm15/Pkd1/Hs6st1	8
BP	GO:0061025	membrane fusion	22/2090	171/28891	0.00612957	0.0366457	0.0269644	Huwe1/Rab8b/Rab7/Rab8a/Pip4k2b/Anxa7/Slamf1/Ubxn2a/Sec22b/Stx16/Chmp5/Tgfbrap1/Vps8/Vamp4/Atp13a2/Chmp6/Snap47/Vav3/Stx8/Bet1/Cd9/Grik5	22
BP	GO:0036344	platelet morphogenesis	6/2090	24/28891	0.00616172	0.0366503	0.0269679	Myh9/Actn1/Zfpm1/Srf/Nbeal2/Gata1	6
BP	GO:0045591	positive regulation of regulatory T cell differentiation	6/2090	24/28891	0.00616172	0.0366503	0.0269679	Tgfb1/Ambra1/Kat5/Sox12/Klhl25/Bcl6	6
BP	GO:0046037	GMP metabolic process	6/2090	24/28891	0.00616172	0.0366503	0.0269679	Paics/Gart/Atic/Pfas/Aprt/Impdh1	6
BP	GO:0071459	protein localization to chromosome, centromeric region	6/2090	24/28891	0.00616172	0.0366503	0.0269679	Rcc2/Ik/Mtbp/Jarid2/Rb1/Haspin	6
BP	GO:0150105	protein localization to cell-cell junction	6/2090	24/28891	0.00616172	0.0366503	0.0269679	Flna/Actn4/Pak2/Scrib/Zdhhc7/Vcl	6
BP	GO:0140013	meiotic nuclear division	26/2090	213/28891	0.00619988	0.0368398	0.0271072	Actr2/Bag6/Eif4g3/Ehmt2/Hsf1/Spin1/Pten/Brca2/Bcl2l11/Chtf18/Mlh1/Slx4/Brip1/Golga2/Syce2/Cep63/Rad51d/Haspin/Mastl/Ercc4/Spire1/Foxj2/Mybl1/Rad51c/Msh5/Mei4	26
BP	GO:0051260	protein homooligomerization	24/2090	192/28891	0.00622391	0.036945	0.0271847	Shmt2/Vasp/Pdcd6ip/Acaca/Evl/Letm1/Pnpt1/Jmjd6/Alad/Golga2/Bend3/Card11/Kctd10/Osbpl2/Kcna3/Micu1/Crtc3/Kctd3/Crtc1/Bbc3/Cbr4/Ehd3/Apip/Arc	24
BP	GO:1903321	negative regulation of protein modification by small protein conjugation or removal	14/2090	92/28891	0.00624979	0.0370609	0.02727	U2af2/Dnaja1/Wnk1/Ogt/Ctnnb1/Akt1/Ubxn1/Prmt3/Abl1/Nxn/Cep63/Limk1/Hdac8/Spry2	14
BP	GO:0002366	leukocyte activation involved in immune response	37/2090	333/28891	0.0062657	0.0371176	0.0273117	Lcp1/Lat/Ndfip1/Nr4a3/Nsd2/Stat6/Msh6/Tgfb1/Kmt2a/Ptk2b/Paxip1/Ly9/Ap1g1/Notch2/Unc13d/Abl1/Slamf1/Lfng/Apbb1ip/Mlh1/Ptger4/Rnf168/Rc3h2/Bcr/Zc3h12a/Myb/Ticam1/Shld2/Cracr2a/Lig4/Rnf8/Bcl6/Atp7a/Il18r1/Slc18a2/Gata1/Fes	37
BP	GO:0006111	regulation of gluconeogenesis	10/2090	56/28891	0.00637236	0.0377112	0.0277485	Ogt/Ptpn2/Kat2a/Arpp19/Prkaca/Nr3c1/Acadm/Gpt2/Dgkq/Gpt	10
BP	GO:0009150	purine ribonucleotide metabolic process	38/2090	345/28891	0.00651573	0.0385206	0.0283441	Fasn/Paics/Gart/Atic/Mthfd1/Pfas/Parp1/Sdha/Ogdh/Bcl2l1/Aprt/Tgfb1/Acaca/Suclg1/Prps2/Impdh1/Dlat/Atp6v1b2/Sdhc/Nudt3/Eno1b/Pank4/Hsd17b4/Bend3/Ndufa3/Flcn/Coasy/Gcdh/Adcy3/Lipa/Gpam/Abcd1/Rab23/Cox11/Atp7a/Acss1/Ehhadh/Acot6	38
BP	GO:0008333	endosome to lysosome transport	12/2090	74/28891	0.00658526	0.038853	0.0285886	Rab7/Snx27/Lyst/Mvb12a/Chmp5/Tgfbrap1/Chmp6/Clec16a/Lipa/Stx8/Vps18/Snx16	12
BP	GO:0042093	T-helper cell differentiation	12/2090	74/28891	0.00658526	0.038853	0.0285886	Stat6/Tgfb1/Kmt2a/Ly9/Ptger4/Rc3h2/Zc3h12a/Myb/Cracr2a/Bcl6/Atp7a/Il18r1	12
BP	GO:0030900	forebrain development	45/2090	425/28891	0.00674909	0.0397795	0.0292703	Ywhae/Ogdh/Nr4a3/Smarca4/Ctnnb1/Arid1a/Notch1/Htt/Coro1c/Uchl5/Bcl11b/Fxr1/Ncor2/Kdm2b/Srf/Akna/Pcnt/Mapk8ip3/Nin/Ski/Kat2a/Crkl/Dbi/Crk/Pten/Aplp2/Zfp335/Mettl3/Agtpbp1/Pomgnt1/Cdon/Ndst1/Arhgap35/Trappc9/Nr4a2/Plxna1/Mfsd2a/Nfix/Wdr47/Afdn/Dclk1/Atp7a/Bbs2/Grcc10/Slc7a11	45
BP	GO:0003206	cardiac chamber morphogenesis	20/2090	152/28891	0.00680441	0.0400627	0.0294788	Fkbp1a/Nsd2/Smarca4/Ctnnb1/Notch1/Nfatc1/Tgfb1/Med1/Heg1/Mdm2/Zfpm1/Srf/Notch2/Rbm15/Gsk3a/Ptcd2/Tgfbr3/Mks1/Vangl2/Fgfrl1	20
BP	GO:0006767	water-soluble vitamin metabolic process	9/2090	48/28891	0.00681773	0.0400627	0.0294788	Shmt2/Mtrr/Rfk/Slc23a2/Slc19a2/Pdxk/Slc52a2/Tpk1/Aldh1l2	9
BP	GO:0047496	vesicle transport along microtubule	9/2090	48/28891	0.00681773	0.0400627	0.0294788	Htt/Ap3b1/Madd/Bicdl1/Kifc1/Kif1c/Kif1b/Bloc1s4/Fyco1	9
BP	GO:0098781	ncRNA transcription	19/2090	142/28891	0.00687301	0.040347	0.0296879	Tcof1/Ddx17/Smarca4/Tgfb1/Yy1/Gtf3c1/Ncor2/Srf/Ice1/Uspl1/Mepce/Polr2f/Spin1/Foxo3/Nr3c1/Snapc1/Cc2d1a/Myb/Mybl1	19
BP	GO:0000096	sulfur amino acid metabolic process	7/2090	32/28891	0.00693486	0.0405493	0.0298368	Mthfd1/Mri1/Mtrr/Gclm/Enoph1/Apip/Slc7a11	7
BP	GO:0055022	negative regulation of cardiac muscle tissue growth	7/2090	32/28891	0.00693486	0.0405493	0.0298368	Yy1/Gsk3a/Pten/Apc/Ctdp1/Jarid2/Mapk11	7
BP	GO:0061117	negative regulation of heart growth	7/2090	32/28891	0.00693486	0.0405493	0.0298368	Yy1/Gsk3a/Pten/Apc/Ctdp1/Jarid2/Mapk11	7
BP	GO:0016053	organic acid biosynthetic process	36/2090	324/28891	0.00693525	0.0405493	0.0298368	Fasn/Shmt2/Cad/Mthfd1/Ubr4/Mthfd1l/Htt/Acaca/Got1/Lta4h/Fabp5/Psph/Scap/Prmt3/Myo5a/Abhd2/Mri1/Mtrr/Bcat2/Elovl6/Enoph1/Mcat/Prkag2/Hacd2/Prkag1/Klhl25/Cbr4/Apip/Abcd1/Daglb/Gls2/Prkab2/Acss1/Star/Chst14/Elovl7	36
BP	GO:0007519	skeletal muscle tissue development	26/2090	215/28891	0.00698929	0.0408245	0.0300393	Ybx3/Ddx17/Ctnnb1/Psma6/Notch1/Tgfb1/Usp19/Mapk14/Ski/Emd/Flnb/Ccnt2/Snw1/Gtf3c5/Rb1/Fkrp/Cdon/Med20/Hdac6/Hdac5/Nfix/Gpc1/Wnt10b/Smyd1/Selenon/Mylpf	26
BP	GO:0009066	aspartate family amino acid metabolic process	8/2090	40/28891	0.00706318	0.0410201	0.0301832	Atf4/Mthfd1/Got1/Mri1/Mtrr/Enoph1/Apip/Gcat	8
BP	GO:0048753	pigment granule organization	8/2090	40/28891	0.00706318	0.0410201	0.0301832	Ap1g1/Ap1m1/Ap1b1/Ap3b1/Lyst/Hps3/Bloc1s4/Hps6	8
BP	GO:0060236	regulation of mitotic spindle organization	8/2090	40/28891	0.00706318	0.0410201	0.0301832	Tpr/Dync1h1/Numa1/Dctn1/Pkd1/Psrc1/Chmp5/Chmp6	8
BP	GO:0090162	establishment of epithelial cell polarity	8/2090	40/28891	0.00706318	0.0410201	0.0301832	Msn/Sipa1/Pkd1/Myo18a/Sipa1l3/Cyth3/Vangl2/Syne4	8
BP	GO:0007272	ensheathment of neurons	24/2090	194/28891	0.00706493	0.0410201	0.0301832	Mapk1/Ctnnb1/Akt1/Rnf10/Tgfb1/Eif2b5/Map2k2/Abca2/Ctsc/Ski/Cst7/Tnfrsf1b/Myo5a/Ncstn/Dlg1/Pten/Mtmr2/Pomgnt1/Cd9/Abcd1/Tnfrsf21/Gpc1/Rarg/Amigo1	24
BP	GO:0008366	axon ensheathment	24/2090	194/28891	0.00706493	0.0410201	0.0301832	Mapk1/Ctnnb1/Akt1/Rnf10/Tgfb1/Eif2b5/Map2k2/Abca2/Ctsc/Ski/Cst7/Tnfrsf1b/Myo5a/Ncstn/Dlg1/Pten/Mtmr2/Pomgnt1/Cd9/Abcd1/Tnfrsf21/Gpc1/Rarg/Amigo1	24
BP	GO:0140888	interferon-mediated signaling pathway	13/2090	84/28891	0.00715276	0.0414889	0.0305281	Med1/Irak1/Ptpn2/Cactin/Ube2k/Ttll12/Ikbke/Tyk2/Mettl3/Trim41/Fadd/Trim65/Txk	13
BP	GO:0070988	demethylation	10/2090	57/28891	0.00723862	0.0419452	0.0308639	Hnrnpab/Trim28/Kdm2b/Phf2/Jmjd6/Jmjd1c/Fto/Por/Phf8/Tet2	10
BP	GO:0001890	placenta development	23/2090	184/28891	0.00729022	0.0421606	0.0310224	Trim28/Mapk1/Parp1/Dazap1/Akt1/Arid1a/Pbrm1/Dnajb6/Med1/Ggnbp2/Mapk14/Notch2/Rbm15/Hsf1/Ndrg3/Pkd1/E2f8/Arnt/Ncoa1/Hs6st1/E2f7/Ctsl/Il11ra1	23
BP	GO:0050851	antigen receptor-mediated signaling pathway	23/2090	184/28891	0.00729022	0.0421606	0.0310224	Wnk1/Mapk1/Khdrbs1/Lat/Ezr/Dgkz/Cblb/Eif2b5/Ptpn2/Ctla4/Crkl/Abl1/Prkd2/Usp12/Rc3h2/Card11/Vav3/Zc3h12a/Lipa/Tnfrsf21/Txk/Sla2/Cmtm3	23
BP	GO:0002294	CD4-positive, alpha-beta T cell differentiation involved in immune response	12/2090	75/28891	0.00733614	0.0423005	0.0311253	Stat6/Tgfb1/Kmt2a/Ly9/Ptger4/Rc3h2/Zc3h12a/Myb/Cracr2a/Bcl6/Atp7a/Il18r1	12
BP	GO:0002763	positive regulation of myeloid leukocyte differentiation	12/2090	75/28891	0.00733614	0.0423005	0.0311253	Tgfb1/Hax1/Notch2/Hsf1/Rptor/Gnas/Rb1/Tmem64/Fadd/Csf1/Ctnnbip1/Fes	12
BP	GO:1905818	regulation of chromosome separation	12/2090	75/28891	0.00733614	0.0423005	0.0311253	Tpr/Rad21/Numa1/Cul3/Ik/Zwint/Plscr1/Apc/Rb1/Haspin/Nsmce2/Xrcc3	12
BP	GO:0008406	gonad development	30/2090	259/28891	0.00734515	0.0423107	0.0311328	Myh9/Ybx3/Flna/Bcl2l1/Nefh/Eif2b5/Safb2/Crkl/Dhx37/Jmjd1c/Lfng/Mfn2/Patz1/Foxo3/Brca2/Zfx/Bcl2l11/Arid4a/Brip1/Taf4/Ptger4/Hsd17b4/Fndc3a/Arid4b/Ermp1/Fancg/Insl3/Insl6/Acvr2a/Gata1	30
BP	GO:0009123	nucleoside monophosphate metabolic process	11/2090	66/28891	0.00738496	0.0423728	0.0311786	Cad/Paics/Gart/Atic/Pfas/Aprt/Prps2/Impdh1/Rfk/Dnph1/Uck1	11
BP	GO:0060337	type I interferon-mediated signaling pathway	11/2090	66/28891	0.00738496	0.0423728	0.0311786	Irak1/Ptpn2/Cactin/Ube2k/Ttll12/Ikbke/Tyk2/Mettl3/Trim41/Fadd/Trim65	11
BP	GO:0060999	positive regulation of dendritic spine development	11/2090	66/28891	0.00738496	0.0423728	0.0311786	Actr2/Dbnl/Pbrm1/Fmr1/Llph/Mfn2/Tsc2/Crebbp/Nr3c1/Tiam1/Afdn	11
BP	GO:0071357	cellular response to type I interferon	11/2090	66/28891	0.00738496	0.0423728	0.0311786	Irak1/Ptpn2/Cactin/Ube2k/Ttll12/Ikbke/Tyk2/Mettl3/Trim41/Fadd/Trim65	11
BP	GO:0061008	hepaticobiliary system development	19/2090	143/28891	0.00740308	0.0424351	0.0312244	Smarca4/Notch1/Cul3/Med1/Rps6ka1/Igf2r/Notch2/Man2a1/Icmt/Ptcd2/Jarid2/Pkd1/E2f8/Acadm/Tet2/Tgfbr3/Lipa/E2f7/Mks1	19
BP	GO:0015749	monosaccharide transmembrane transport	17/2090	123/28891	0.00743399	0.0425705	0.031324	Nr4a3/Akt1/Fabp5/Mapk14/Gsk3a/Rasa1/Mfn2/Tsc2/Slc23a2/Zdhhc7/Prkci/Stxbp3/Repin1/Slc2a8/Slc2a9/Slc25a27/Opn3	17
BP	GO:0015748	organophosphate ester transport	18/2090	133/28891	0.00744845	0.0426116	0.0313542	Pitpnm2/Atp10a/Plscr1/Pitpnb/Dbi/Lrrc8c/Slc35b2/Abcc5/Abcc4/Spns1/Pitpnc1/Osbpl2/Atp8a1/Mfsd2a/Slc33a1/Prelid2/Ank/Atp10d	18
BP	GO:0051250	negative regulation of lymphocyte activation	22/2090	174/28891	0.0074995	0.0428616	0.0315382	Prkar1a/Ndfip1/Cbfb/Cd44/Cblb/Tgfb1/Zc3h12d/Scrib/Ptpn2/Ctla4/Pkn1/Tsc2/Dlg1/Pten/Rc3h2/Pag1/Dapl1/Tnfrsf14/Fbxo7/Zc3h12a/Tnfrsf21/Bcl6	22
BP	GO:0042129	regulation of T cell proliferation	27/2090	227/28891	0.00753837	0.0430356	0.0316662	Prkar1a/Ndfip1/Ctnnb1/Cd44/Il12rb1/Cblb/Tgfb1/Zc3h12d/Scrib/Ctla4/Slamf1/Tnfrsf1b/Tsc2/Dlg1/Pten/Tyk2/Selenok/Card11/Znhit1/Tnfrsf14/Fadd/Gpam/Tnfrsf21/Bcl6/Ager/Efnb1/Cd1d1	27
BP	GO:0006094	gluconeogenesis	14/2090	94/28891	0.00755941	0.0430356	0.0316662	Atf4/Mdh2/Ogt/Got1/Ptpn2/Kat2a/Arpp19/Gpd2/Prkaca/Nr3c1/Acadm/Gpt2/Dgkq/Gpt	14
BP	GO:0006664	glycolipid metabolic process	14/2090	94/28891	0.00755941	0.0430356	0.0316662	B4galnt1/St6galnac4/Abca2/Pigt/Pigq/Gpaa1/Pigs/Pign/Gba2/Pigl/Gla/Pigyl/Pgap3/B4galt4	14
BP	GO:0043525	positive regulation of neuron apoptotic process	14/2090	94/28891	0.00755941	0.0430356	0.0316662	Atf4/Ctnnb1/Traf7/Hdac3/Abl1/Gsk3a/Map3k11/Nr3c1/Bcl2l11/Aimp2/Bbc3/Myb/Grik5/Ager	14
BP	GO:0000083	regulation of transcription involved in G1/S transition of mitotic cell cycle	5/2090	18/28891	0.00761582	0.0430845	0.0317022	Brd4/Rb1/Hinfp/E2f7/Bach1	5
BP	GO:0021756	striatum development	5/2090	18/28891	0.00761582	0.0430845	0.0317022	Ogdh/Htt/Bcl11b/Bbs2/Slc7a11	5
BP	GO:0045945	positive regulation of transcription by RNA polymerase III	5/2090	18/28891	0.00761582	0.0430845	0.0317022	Mybbp1a/Baz1b/Ice1/Rptor/Brf1	5
BP	GO:0046755	viral budding	5/2090	18/28891	0.00761582	0.0430845	0.0317022	Pdcd6ip/Mvb12a/Chmp5/Chmp6/Mvb12b	5
BP	GO:0060382	regulation of DNA strand elongation	5/2090	18/28891	0.00761582	0.0430845	0.0317022	Yy1/Uchl5/Actl6a/Mcrs1/Ino80	5
BP	GO:0097401	synaptic vesicle lumen acidification	5/2090	18/28891	0.00761582	0.0430845	0.0317022	Atp6v1b2/Atp6v1f/Atp6v1h/Atp6v1e1/Atp6v1d	5
BP	GO:0051788	response to misfolded protein	6/2090	25/28891	0.00761964	0.0430845	0.0317022	Bag6/Cul3/Aup1/Dnajb12/Hdac6/Ube2w	6
BP	GO:0002685	regulation of leukocyte migration	29/2090	249/28891	0.00770105	0.0435027	0.03201	Msn/C1qbp/Wnk1/Mapk1/Akt1/Tgfb1/Dock8/Ptk2b/Stk10/Crkl/Abl1/Slamf1/Stk39/Capn1/Crk/Mia3/Selenok/Ptger4/Rin3/Bcr/Mpp1/Tnfrsf14/Wasl/Fadd/Cd9/Creb3/Csf1/Fut7/Ager	29
BP	GO:0050856	regulation of T cell receptor signaling pathway	9/2090	49/28891	0.00782765	0.0441013	0.0324504	Ezr/Dgkz/Cblb/Ptpn2/Prkd2/Usp12/Card11/Lipa/Sla2	9
BP	GO:0045185	maintenance of protein location	15/2090	104/28891	0.00782967	0.0441013	0.0324504	Flna/Srgn/Rangap1/Akt1/Hdac3/Mprip/Os9/Arl2bp/Pkd1/Vps13d/Fkrp/Sufu/Taf3/Creb3/Grik5	15
BP	GO:0070664	negative regulation of leukocyte proliferation	15/2090	104/28891	0.00782967	0.0441013	0.0324504	Prkar1a/Ndfip1/Cd44/Cblb/Tgfb1/Zc3h12d/Scrib/Ctla4/Pkn1/Tsc2/Dlg1/Pten/Tnfrsf14/Tnfrsf21/Bcl6	15
BP	GO:0002761	regulation of myeloid leukocyte differentiation	20/2090	154/28891	0.00784519	0.0441462	0.0324834	Ndfip1/Ctnnb1/Tgfb1/Hax1/Ptpn2/Zfpm1/Notch2/Hsf1/Apc/Rptor/Gnas/Rb1/Tmem64/Tfe3/Fadd/Csf1/Gpr137/Gpr55/Ctnnbip1/Fes	20
BP	GO:0030278	regulation of ossification	19/2090	144/28891	0.0079658	0.0447817	0.0329511	Srgn/Mapk1/Notch1/Tgfb1/Ptk2b/Mapk14/Suv39h1/Mia3/Ptger4/Slc20a2/Ank/Rflnb/Csf1/Atraid/Wnt10b/P3h1/Acvr2a/Thrb/Gata1	19
BP	GO:0006874	intracellular calcium ion homeostasis	36/2090	327/28891	0.00798426	0.0448424	0.0329957	Ywhae/Atf4/Flna/Atp2a2/Ghitm/Fkbp1a/Calm3/Htt/Cherp/Tgfb1/Diaph1/Ptk2b/Nptn/Letm1/Bcap31/Anxa7/Abl1/Herpud1/Myo5a/Dbi/Mfn2/Tmco1/Selenok/Tcirg1/Pacs2/Slc35g1/Tmem64/Mcur1/Atp13a2/Micu1/Bbc3/Mcub/Selenon/Stc2/Tspoap1/Slc25a27	36
BP	GO:0060485	mesenchyme development	35/2090	316/28891	0.00805075	0.0451723	0.0332385	Hnrnpab/Trim28/Flna/Tcof1/Mapk1/Ddx17/Ctnnb1/Notch1/Nfatc1/Htt/Coro1c/Tgfb1/Nup133/Mdm2/Akna/Clasp1/Pdcd6/Tsc2/Smad2/Pten/Spry1/Sdhaf2/Tiam1/Zfp64/Tgfbr3/Pofut2/Rflnb/Adam15/Zfp703/Phldb1/Vasn/Vangl2/Spry2/Ager/Efnb1	35
BP	GO:0051651	maintenance of location in cell	29/2090	250/28891	0.00812653	0.0455538	0.0335192	Flna/Srgn/Ghitm/Fkbp1a/Rangap1/Calm3/Akt1/Polr2m/Htt/Cherp/Tgfb1/Diaph1/Ptk2b/Letm1/Hdac3/Mprip/Abl1/Os9/Myo5a/Dbi/Arl2bp/Vps13d/Fkrp/Gaa/Slc30a7/Taf3/Bbc3/Grik5/Selenon	29
BP	GO:0002293	alpha-beta T cell differentiation involved in immune response	12/2090	76/28891	0.00815263	0.0456125	0.0335624	Stat6/Tgfb1/Kmt2a/Ly9/Ptger4/Rc3h2/Zc3h12a/Myb/Cracr2a/Bcl6/Atp7a/Il18r1	12
BP	GO:0060997	dendritic spine morphogenesis	12/2090	76/28891	0.00815263	0.0456125	0.0335624	Actr2/Dbnl/Prmt3/Mfn2/Pten/Tiam1/Pdlim5/Hdac6/Wasl/Zfp365/Afdn/Arc	12
BP	GO:0009126	purine nucleoside monophosphate metabolic process	8/2090	41/28891	0.00823097	0.0458751	0.0337556	Paics/Gart/Atic/Pfas/Aprt/Prps2/Impdh1/Dnph1	8
BP	GO:0043368	positive T cell selection	8/2090	41/28891	0.00823097	0.0458751	0.0337556	Stat6/Tgfb1/Ly9/Bcl11b/Ptpn2/Srf/Ctsl/Cd1d1	8
BP	GO:0045601	regulation of endothelial cell differentiation	8/2090	41/28891	0.00823097	0.0458751	0.0337556	Btg1/Ctnnb1/Notch1/Ikbkb/Akap11/Vezf1/Foxj2/Vcl	8
BP	GO:0060603	mammary gland duct morphogenesis	8/2090	41/28891	0.00823097	0.0458751	0.0337556	Phb2/Tgfb1/Scrib/Med1/Nr3c1/Lrp5/Btrc/Csf1	8
BP	GO:0033598	mammary gland epithelial cell proliferation	7/2090	33/28891	0.0082632	0.0459162	0.0337858	Phb2/Mapk1/Stat6/Med1/Brca2/Btrc/Zfp703	7
BP	GO:0044273	sulfur compound catabolic process	7/2090	33/28891	0.0082632	0.0459162	0.0337858	Mtrr/Ids/Hgsnat/Abcd1/Idua/Gpc1/Arsb	7
BP	GO:2000780	negative regulation of double-strand break repair	7/2090	33/28891	0.0082632	0.0459162	0.0337858	Ubqln4/Abl1/Hsf1/Kat5/Rnf169/Aunip/Shld2	7
BP	GO:0008652	amino acid biosynthetic process	11/2090	67/28891	0.00827223	0.0459162	0.0337858	Shmt2/Cad/Mthfd1/Got1/Psph/Mri1/Mtrr/Bcat2/Enoph1/Apip/Gls2	11
BP	GO:0002244	hematopoietic progenitor cell differentiation	23/2090	186/28891	0.00827764	0.0459162	0.0337858	Notch1/Kcnab2/Tgfb1/Nudt21/Rrs1/Med1/Srf/Ap3b1/Dpf2/Sh2b3/Setd1a/Srsf4/Ssbp3/Kat5/Flcn/Tet2/Znhit1/Lmbr1l/Acp6/Sipa1l3/Lipa/Myb/Lig4	23
BP	GO:1903509	liposaccharide metabolic process	14/2090	95/28891	0.00829123	0.0459479	0.0338091	B4galnt1/St6galnac4/Abca2/Pigt/Pigq/Gpaa1/Pigs/Pign/Gba2/Pigl/Gla/Pigyl/Pgap3/B4galt4	14
BP	GO:0051607	defense response to virus	36/2090	328/28891	0.00836198	0.0462276	0.0340149	G3bp1/Trim28/C1qbp/Phb2/Pcbp2/Ddx17/Tagap/Il12rb1/Bcl2l1/Ubqln1/Trim27/Erbin/Plscr1/Unc13d/Trim8/Clpb/Selenok/Lyst/Akap1/Armc5/Rnf216/Dus2/Trim41/Ube2w/Zc3h12a/Fadd/Creb3/Gpam/Ticam1/Usp20/Trim65/Zcchc3/Zdhhc1/Ticam2/Nlrx1/Sertad3	36
BP	GO:0000727	double-strand break repair via break-induced replication	4/2090	12/28891	0.00843667	0.0462276	0.0340149	Mcm2/Cdc45/Cdc7/Gins4	4
BP	GO:0003263	cardioblast proliferation	4/2090	12/28891	0.00843667	0.0462276	0.0340149	Ctnnb1/Notch1/Gng5/Mks1	4
BP	GO:0003264	regulation of cardioblast proliferation	4/2090	12/28891	0.00843667	0.0462276	0.0340149	Ctnnb1/Notch1/Gng5/Mks1	4
BP	GO:0006855	xenobiotic transmembrane transport	4/2090	12/28891	0.00843667	0.0462276	0.0340149	Slc19a1/Abcc4/Slc37a3/Atraid	4
BP	GO:0007440	foregut morphogenesis	4/2090	12/28891	0.00843667	0.0462276	0.0340149	Ctnnb1/Notch1/Foxp4/Smad2	4
BP	GO:0018027	peptidyl-lysine dimethylation	4/2090	12/28891	0.00843667	0.0462276	0.0340149	Ehmt2/Setd7/Ehmt1/Smyd2	4
BP	GO:0046015	regulation of transcription by glucose	4/2090	12/28891	0.00843667	0.0462276	0.0340149	Ogt/Srf/Suv39h1/Sik2	4
BP	GO:0106049	regulation of cellular response to osmotic stress	4/2090	12/28891	0.00843667	0.0462276	0.0340149	Ybx3/Usp15/Letm1/Micu1	4
BP	GO:0140052	cellular response to oxidised low-density lipoprotein particle stimulus	4/2090	12/28891	0.00843667	0.0462276	0.0340149	Akt1/Mia3/Ticam1/Cd68	4
BP	GO:1905456	regulation of lymphoid progenitor cell differentiation	4/2090	12/28891	0.00843667	0.0462276	0.0340149	Notch1/Nudt21/Flcn/Znhit1	4
BP	GO:2000562	negative regulation of CD4-positive, alpha-beta T cell proliferation	4/2090	12/28891	0.00843667	0.0462276	0.0340149	Ndfip1/Cd44/Cblb/Tnfrsf14	4
BP	GO:0051702	biological process involved in interaction with symbiont	16/2090	115/28891	0.00867114	0.0474678	0.0349275	Fasn/Psmc3/Smarca4/Brd4/Rrp1b/Pi4ka/Fmr1/Igf2r/Snw1/Ccnk/Zfp639/Ctdp1/Sap30bp/Zdhhc8/Zc3h12a/Rab9	16
BP	GO:0006400	tRNA modification	13/2090	86/28891	0.00870579	0.0475683	0.0350015	Akt1/Thumpd1/Tarbp1/Ctu2/Wdr6/Dalrd3/Dus2/Trit1/Elp6/Elp4/Ctu1/Trmt10b/Dtwd2	13
BP	GO:0044774	mitotic DNA integrity checkpoint signaling	13/2090	86/28891	0.00870579	0.0475683	0.0350015	Ccng1/Dgkz/Rbm38/Clspn/Mdm2/Cdkn1a/Uimc1/Rad9a/Fbxo31/Abraxas1/Mbd4/Xpc/Setmar	13
BP	GO:0042063	gliogenesis	42/2090	397/28891	0.00874896	0.0477446	0.0351312	Suz12/Mapk1/Smarca4/Ctnnb1/Akt1/Notch1/Rnf10/Tgfb1/Scrib/Eif2b5/Cers2/Med12/Map2k2/Abca2/Notch2/Ski/Crkl/Anxa7/Rheb/Abl1/Tnfrsf1b/Ncstn/Dbi/Mfn2/Pten/Nr3c1/Rb1/Fkrp/Synj1/Mettl3/Prkci/Tiam1/Nfix/Myb/Cd9/Csf1/Wdr47/Zfp365/Tnfrsf21/Afdn/Gpc1/Ager	42
BP	GO:0140546	defense response to symbiont	36/2090	329/28891	0.00875441	0.0477446	0.0351312	G3bp1/Trim28/C1qbp/Phb2/Pcbp2/Ddx17/Tagap/Il12rb1/Bcl2l1/Ubqln1/Trim27/Erbin/Plscr1/Unc13d/Trim8/Clpb/Selenok/Lyst/Akap1/Armc5/Rnf216/Dus2/Trim41/Ube2w/Zc3h12a/Fadd/Creb3/Gpam/Ticam1/Usp20/Trim65/Zcchc3/Zdhhc1/Ticam2/Nlrx1/Sertad3	36
BP	GO:0008064	regulation of actin polymerization or depolymerization	21/2090	166/28891	0.00879158	0.0479026	0.0352475	Capzb/Sptan1/Cotl1/Vasp/Dbnl/Mtpn/Ptk2b/Evl/Hax1/Ssh2/Was/Capn1/Rasa1/Dlg1/Specc1l/Gba2/Arhgap35/Kank3/Cdc42ep3/Cttn/Pfn2	21
BP	GO:0043409	negative regulation of MAPK cascade	23/2090	187/28891	0.00881074	0.0479623	0.0352913	Dnaja1/Csk/Ezr/Rapgef1/Akt1/Hipk3/Cdc42se1/Ptpn2/Dusp5/Hdac3/Fem1a/Abl1/Tsc2/Dlg1/Pten/Apc/Sh2b3/Spry1/Flcn/Dusp7/Ankrd26/E130311K13Rik/Spry2	23
BP	GO:0001649	osteoblast differentiation	27/2090	230/28891	0.00892118	0.0485182	0.0357004	Atf4/Ctnnb1/Cbfb/Akt1/Clic1/Notch1/Nfatc1/Jund/Mapk14/Ski/Apc/Gnas/Prkaca/Tcirg1/Ptger4/Tmem64/Hdac5/Lrp5/Tgfbr3/Mapk11/Atraid/Wnt10b/Hdac8/Wwox/Trp53inp2/Acvr2a/Ctnnbip1	27
BP	GO:0070232	regulation of T cell apoptotic process	9/2090	50/28891	0.00894753	0.0486163	0.0357726	Tnfrsf4/Dock8/Bcl11b/Prkd2/Bcl2l11/Pdcd7/Bbc3/Fadd/Gpam	9
BP	GO:0072522	purine-containing compound biosynthetic process	28/2090	241/28891	0.0089928	0.0488169	0.0359202	Shmt2/Paics/Gart/Atic/Mthfd1/Pfas/Parp1/Sdha/Bcl2l1/Nadk/Aprt/Tgfb1/Prps2/Impdh1/Dlat/Sdhc/Prpsap1/Eno1b/Pank4/Ndufa3/Flcn/Coasy/Gcdh/Adcy3/Lipa/Adal/Cox11/Acss1	28
BP	GO:0009152	purine ribonucleotide biosynthetic process	24/2090	198/28891	0.00902758	0.0489282	0.0360021	Paics/Gart/Atic/Mthfd1/Pfas/Parp1/Sdha/Bcl2l1/Aprt/Tgfb1/Prps2/Impdh1/Dlat/Sdhc/Eno1b/Pank4/Ndufa3/Flcn/Coasy/Gcdh/Adcy3/Lipa/Cox11/Acss1	24
BP	GO:0002287	alpha-beta T cell activation involved in immune response	12/2090	77/28891	0.00903844	0.0489282	0.0360021	Stat6/Tgfb1/Kmt2a/Ly9/Ptger4/Rc3h2/Zc3h12a/Myb/Cracr2a/Bcl6/Atp7a/Il18r1	12
BP	GO:0006635	fatty acid beta-oxidation	12/2090	77/28891	0.00903844	0.0489282	0.0360021	Akt1/Hadha/Hadhb/Dbi/Tysnd1/Hsd17b4/Acadm/Mfsd2a/Gcdh/Abcd1/Ehhadh/Aldh1l2	12
BP	GO:0032465	regulation of cytokinesis	14/2090	96/28891	0.00907795	0.0490512	0.0360926	Wnk1/Calm3/Bcl2l1/Cul3/Git1/Brca2/E2f8/Flcn/Gipc1/Zfyve19/Klhl21/Rab11fip3/E2f7/Map10	14
BP	GO:0050672	negative regulation of lymphocyte proliferation	14/2090	96/28891	0.00907795	0.0490512	0.0360926	Prkar1a/Ndfip1/Cd44/Cblb/Tgfb1/Zc3h12d/Scrib/Ctla4/Pkn1/Tsc2/Dlg1/Pten/Tnfrsf14/Tnfrsf21	14
BP	GO:0009247	glycolipid biosynthetic process	11/2090	68/28891	0.00923994	0.0495219	0.0364389	B4galnt1/St6galnac4/Pigt/Pigq/Gpaa1/Pigs/Pign/Pigl/Pigyl/Pgap3/B4galt4	11
BP	GO:0032720	negative regulation of tumor necrosis factor production	11/2090	68/28891	0.00923994	0.0495219	0.0364389	Rad21/Trim27/Fxr1/Hdac3/Cactin/Slamf1/Hsf1/Ptger4/Selenos/Zc3h12a/Nfkbil1	11
BP	GO:0048286	lung alveolus development	11/2090	68/28891	0.00923994	0.0495219	0.0364389	Tgfb1/Mapk8ip3/Stk40/Man1a2/Man2a1/Rc3h2/Hs6st1/Zfp157/Atp7a/Selenon/Slc7a11	11
BP	GO:0001825	blastocyst formation	10/2090	59/28891	0.00924137	0.0495219	0.0364389	Cul3/Pbrm1/Rrp7a/Srf/Actl6a/Bysl/Ctr9/Cnot3/Uspl1/Mfn2	10
BP	GO:0007019	microtubule depolymerization	10/2090	59/28891	0.00924137	0.0495219	0.0364389	Arhgef1/Htt/Clasp1/Map1s/Apc/Specc1l/Hdgfl3/Camsap1/Hdac6/Wdr47	10
BP	GO:1900024	regulation of substrate adhesion-dependent cell spreading	10/2090	59/28891	0.00924137	0.0495219	0.0364389	Rcc2/Flna/C1qbp/Actn4/Coro1c/Crkl/Unc13d/Abl1/Crk/Tesk1	10
BP	GO:1904356	regulation of telomere maintenance via telomere lengthening	10/2090	59/28891	0.00924137	0.0495219	0.0364389	Hnrnpc/Mapk1/Parp1/Ctnnb1/Exosc10/Nat10/Ctc1/Mcrs1/Slx4/Ercc4	10
BP	GO:1990542	mitochondrial transmembrane transport	10/2090	59/28891	0.00924137	0.0495219	0.0364389	Akt1/Slc25a39/Pnpt1/Mcur1/Grpel2/Micu1/Sfxn3/Mcub/Tst/Sfxn4	10
BP	GO:2000300	regulation of synaptic vesicle exocytosis	10/2090	59/28891	0.00924137	0.0495219	0.0364389	Rap1b/Atp2a2/Bcl2l1/Fmr1/Git1/Git2/Stxbp5/Vps18/Slc4a8/Pfn2	10
BP	GO:0019068	virion assembly	6/2090	26/28891	0.00931046	0.0496643	0.0365437	Pdcd6ip/Mvb12a/Chmp5/Chmp6/Mvb12b/Rab43	6
BP	GO:0045722	positive regulation of gluconeogenesis	6/2090	26/28891	0.00931046	0.0496643	0.0365437	Ptpn2/Kat2a/Arpp19/Prkaca/Gpt2/Gpt	6
BP	GO:0045736	negative regulation of cyclin-dependent protein serine/threonine kinase activity	6/2090	26/28891	0.00931046	0.0496643	0.0365437	Cdkn1a/Hexim1/Pten/Apc/Fbxo7/Cdkn2c	6
BP	GO:0046856	phosphatidylinositol dephosphorylation	6/2090	26/28891	0.00931046	0.0496643	0.0365437	Pten/Mtmr2/Synj1/Mtmr9/Inpp5e/Pip4p2	6
BP	GO:0070168	negative regulation of biomineral tissue development	6/2090	26/28891	0.00931046	0.0496643	0.0365437	Srgn/Notch1/Tgfb1/Ptk2b/Rflnb/Gata1	6
BP	GO:0055074	calcium ion homeostasis	38/2090	353/28891	0.00933475	0.0497484	0.0366056	Ywhae/Atf4/Flna/Atp2a2/Ghitm/Fkbp1a/Calm3/Htt/Cherp/Tgfb1/Diaph1/Ptk2b/Nptn/Letm1/Bcap31/Anxa7/Abl1/Herpud1/Myo5a/Dbi/Mfn2/Tmco1/Selenok/Tcirg1/Pacs2/Slc35g1/Tmem64/Mcur1/Znhit1/Atp13a2/Micu1/Bbc3/Ank/Mcub/Selenon/Stc2/Tspoap1/Slc25a27	38
CC	GO:0016607	nuclear speck	75/2101	369/28573	5.68453e-16	3.95075e-13	2.4234e-13	Srrm2/Pcbp1/Rbm39/Thrap3/U2af2/Sf3b2/Eftud2/Snrnp70/Brd2/Rbm25/Srrm1/Ddx17/Dgkz/Sf3a1/Wbp11/Uhmk1/Ik/Zc3h18/Usp36/Rbm8a/Erbin/Hipk1/Ehmt2/Ccnl1/Phf5a/Sf3a2/Kat6a/Mapk14/Cdk13/Rbm14/Rbm15/Rbm15b/Cxxc1/Zc3h13/Cactin/Ylpm1/Cwc15/Rad54l2/Snw1/Rbm19/Fam76b/Pacsin2/Fto/Prkaca/Tfip11/Nr3c1/Unc45a/Slu7/Polr2d/Wbp4/Fam193b/Setd1a/Srsf4/Hikeshi/Mettl3/Vps72/Ak6/Eapp/Stk19/Limk1/Hdac5/Oip5/Nr4a2/Phf7/Mbd4/C…	75
CC	GO:0070603	SWI/SNF superfamily-type complex	30/2101	94/28573	2.50968e-12	7.51713e-10	4.61104e-10	Mybbp1a/Chd4/Baz1b/Suz12/Mta2/Smarcc1/Smarca4/Arid1a/Trrap/Gatad2a/Mta1/Pbrm1/Yy1/Uchl5/Bcl11b/Smarcc2/Phf10/Actl6a/Dpf2/Mcrs1/Ino80/Arid1b/Rsf1/Smarcd1/Kat5/Ing3/Znhit1/Bcl7a/Smarca2/Ss18l1	30
CC	GO:0008023	transcription elongation factor complex	22/2101	52/28573	3.24481e-12	7.51713e-10	4.61104e-10	Brd4/Supt5/Ccnl1/Mllt1/Cdk13/Ice1/Eaf1/Epop/Ctr9/Ccnt2/Cdc73/Snw1/Aff4/Ccnk/Supt4a/Elof1/Nelfa/Nelfcd/Rb1/Leo1/Elp4/Eaf2	22
CC	GO:1904949	ATPase complex	38/2101	148/28573	6.21649e-12	1.08012e-09	6.62547e-10	Mybbp1a/Chd4/Baz1b/Suz12/Mta2/Smarcc1/Smarca4/Arid1a/Trrap/Ptpa/Gatad2a/Mta1/Pbrm1/Yy1/Uchl5/Bcl11b/Smarcc2/Phf10/Actl6a/Dpf2/Atp6v1b2/Mcrs1/Ino80/Atp6v1f/Atp6v1h/Arid1b/Rsf1/Atp6v1e1/Tcirg1/Smarcd1/Atp6v1d/Kat5/Ing3/Znhit1/Bcl7a/Smarca2/Tmem199/Ss18l1	38
CC	GO:0034399	nuclear periphery	36/2101	136/28573	8.48177e-12	1.17897e-09	7.23182e-10	Hnrnpm/Cad/Sfpq/Atf4/Phb2/Tpr/Anp32a/Lmnb1/Rad21/Srrm1/Smarcc1/Smarca4/Numa1/Psma6/Nup93/Pbrm1/Yy1/Phf5a/Smarcc2/Phf10/Stag1/Ncor2/Actl6a/Cxxc1/Emd/Snw1/Lmnb2/Hltf/Smarcd1/Enc1/Gmcl1/Kat8/Ercc8/Narf/Dgkq/Zfp703	36
CC	GO:0005819	spindle	66/2101	367/28573	1.11892e-11	1.29608e-09	7.95021e-10	Myh9/Rcc2/Tubb4b/Tpr/Rangap1/Wnk1/Nudc/Calm3/Akt1/Numa1/Diaph1/Cul3/Ik/Csnk1d/Rtraf/Tbl1x/Rps6ka1/Stag1/Mapk14/Clasp1/Hdac3/Nubp2/Git1/Nin/Dctn1/Nsmce1/Kat2a/Emd/Mms19/Cdc7/Map1s/Cep250/Hsf1/Spin1/Kifc1/Jtb/Kif2a/Ctdp1/Tmem201/Tubgcp6/Kat14/Dctn4/Mzt1/Rb1/Golga2/Ciao1/Psrc1/Kat5/Flcn/Chmp5/Haspin/Chmp6/Eml2/Klhl21/Poc1b/Cep95/Cep44/Aunip/Plk2/Anxa11/Ttl/Mzt2/Ccdc69/Cttn/Rmdn2/Map10	66
CC	GO:0005635	nuclear envelope	75/2101	451/28573	2.31868e-11	2.30212e-09	1.41213e-09	Canx/Tmpo/Nup210/Tpr/Rangap1/Lmnb1/Ube2i/Parp1/Abcf1/Dync1h1/Ctnnb1/Ankrd17/Kpna4/Polr2m/Clic1/Nup188/Mta1/Ipo9/Nup93/Trim27/Pom121/Xpo7/Gpx4/Sec13/Nup214/Fxr1/Igf2r/Nup133/Aen/Tmem97/Rbm15b/Clip1/Dctn1/Casc3/Emd/Dhx37/Anxa7/Ipo8/Rasa1/Apeh/Spin1/Dpy19l1/Tmem168/Rnf123/Lmnb2/Apc/Tnrc18/Tmem201/Eno1b/Brap/Brip1/Ptger4/Phf8/Chmp5/Epc1/Cnep1r1/Taf3/Dnajb12/Gmcl1/Chmp6/Pcyt1a/Scai/Dpy19l3/Inpp4a/Tmx4…	75
CC	GO:0016363	nuclear matrix	30/2101	107/28573	9.6417e-11	8.02419e-09	4.92207e-09	Hnrnpm/Cad/Sfpq/Phb2/Anp32a/Lmnb1/Rad21/Srrm1/Smarcc1/Smarca4/Numa1/Psma6/Pbrm1/Yy1/Phf5a/Smarcc2/Phf10/Stag1/Ncor2/Actl6a/Cxxc1/Snw1/Hltf/Smarcd1/Enc1/Gmcl1/Kat8/Ercc8/Dgkq/Zfp703	30
CC	GO:0005681	spliceosomal complex	46/2101	221/28573	1.0391e-10	8.02419e-09	4.92207e-09	Pabpc1/Srrm2/Hnrnpm/Hnrnpc/U2af2/Sf3b2/Eftud2/Snrnp70/Srrm1/Eif4a3/Sf3a1/Upf1/Sf3b4/Ik/Rbm8a/Snrpd3/Phf5a/Sf3a2/Dhx38/Casc3/Cactin/Zmat2/Rbm22/Cwc15/Rheb/Snw1/Lsm2/Prpf39/Isy1/Crnkl1/Tfip11/Zcrb1/Slu7/Wbp4/Frg1/Pdcd7/Gemin2/Ptbp2/Mfap1a/Wdr83/Rnf113a2/Armc7/Gcfc2/Rbm48/Prpf40b/Dqx1	46
CC	GO:0061695	transferase complex, transferring phosphorus-containing groups	55/2101	296/28573	1.61703e-10	1.11791e-08	6.85727e-09	Prkar1a/Polr2a/Ccng1/Pole/Polr2m/Trrap/Psmc5/Brd4/Pold2/Taf1/Ccnl1/Med12/Ikbkb/Prps2/Atxn7l3/Cks1b/Polg/Cdk13/Vac14/Polr1c/Kat2a/Cdkn1a/Prkar2a/Ctr9/Ccnt2/Cdc73/Polr2g/Snw1/Ccnk/Rpap1/Prpsap1/Polr2f/Gtf2e2/Gtf2a1/Prkaca/Polr2d/Taf4/Rb1/Tbpl1/Polrmt/Leo1/Tbc1d5/Prkci/Taf3/Pik3c2a/Polr2j/Prkag2/Prkag1/Cdk10/Primpol/Taf9b/Prkab2/Sla2/Prkar2b/Acvr2a	55
CC	GO:0035770	ribonucleoprotein granule	51/2101	264/28573	1.76935e-10	1.11791e-08	6.85727e-09	Pabpc1/Eif4g1/Hnrnpab/G3bp1/Hnrnpl/Eif3b/Pcbp1/Larp1/Pabpc4/Khsrp/Eif4enif1/Eif4ebp2/Ago2/Psmc3/Sympk/Psma6/Htt/Uhmk1/Zc3h12d/Dhx30/Rpl6l/Fmr1/Fxr1/Edc4/Pum1/Grsf1/Polr2g/Cnot3/Ago1/Lsm2/Gabpb1/Patl1/Dcp1a/Xrn1/Pnrc2/Hsf1/Tia1/Rptor/Helz/Dcps/Rc3h2/Atxn2/Lsm1/Zc3h12a/Dyrk3/Rbm4/Mex3b/Rpusd3/Arc/Nbdy/Grb7	51
CC	GO:0090575	RNA polymerase II transcription regulator complex	47/2101	249/28573	1.99472e-09	1.15528e-07	7.08651e-08	Hnrnpab/Chd4/Sfpq/Trim28/Atf4/Ctnnb1/Cbfb/Stat6/Trrap/Psmc5/Jund/Taf1/Med1/Carm1/Atf1/Atxn7l3/Kat2a/Med24/Med15/Med25/Atf6b/Mlxip/Gtf2e2/Gtf2a1/Smad2/Crebbp/Nfyc/Hltf/Atf6/Taf4/E2f8/Rb1/Tbpl1/Arnt/Med16/Taf3/Thap11/Med20/Ncoa1/Myb/Med26/Creb3/E2f7/Bach1/Taf9b/Wwox/Thrb	47
CC	GO:1905368	peptidase complex	30/2101	121/28573	2.47941e-09	1.32553e-07	8.13086e-08	Psme1/Ide/Psmb4/Psmd8/Psmd3/Psmc3/Psmd1/Psmb1/Trrap/Psmc4/Psma6/Psmc5/Ubqln1/Psma5/Psmb2/Spcs2/Psmd12/Psmd4/Uchl5/Ubqln4/Atxn7l3/Afg3l1/Sec11a/Pigt/Kat2a/Gpaa1/Sec11c/Pigs/Psmf1/Tada2b	30
CC	GO:0030135	coated vesicle	41/2101	205/28573	3.65568e-09	1.81478e-07	1.1132e-07	Rab8b/Htt/Ap2b1/Sar1a/Tmed5/Sec13/Sec31a/Copz1/Rab8a/Igf2r/Hax1/Ap1g1/Ap1m1/Bcap31/Sec16a/Ap1b1/Ctla4/Ap2a1/Pdcd6/Unc13d/Ergic1/Spg21/Sec22b/Gnas/Tnk2/Scyl1/Golga2/Cnih4/Synrg/Tbc1d5/Pik3c2a/Slc28a2/Tmem199/Dennd1a/Pacsin1/Fcho2/Necap1/Lman2l/Cracr2a/Atp7a/Vangl2	41
CC	GO:0005684	U2-type spliceosomal complex	28/2101	112/28573	6.84338e-09	3.17077e-07	1.94496e-07	Srrm2/U2af2/Sf3b2/Eftud2/Snrnp70/Eif4a3/Sf3a1/Sf3b4/Ik/Rbm8a/Snrpd3/Phf5a/Sf3a2/Casc3/Zmat2/Rbm22/Cwc15/Snw1/Lsm2/Prpf39/Isy1/Crnkl1/Tfip11/Wbp4/Mfap1a/Rnf113a2/Gcfc2/Prpf40b	28
CC	GO:0036464	cytoplasmic ribonucleoprotein granule	45/2101	246/28573	1.19135e-08	5.17493e-07	3.17432e-07	Pabpc1/Eif4g1/Hnrnpab/G3bp1/Eif3b/Pcbp1/Larp1/Pabpc4/Khsrp/Eif4enif1/Eif4ebp2/Ago2/Psmc3/Psma6/Htt/Uhmk1/Zc3h12d/Rpl6l/Fmr1/Fxr1/Edc4/Pum1/Polr2g/Cnot3/Ago1/Lsm2/Gabpb1/Patl1/Dcp1a/Xrn1/Pnrc2/Tia1/Rptor/Helz/Dcps/Rc3h2/Atxn2/Lsm1/Zc3h12a/Dyrk3/Rbm4/Mex3b/Arc/Nbdy/Grb7	45
CC	GO:0000123	histone acetyltransferase complex	24/2101	88/28573	1.28452e-08	5.25142e-07	3.22124e-07	Hcfc1/Ogt/Trrap/Jade2/Msl2/Kat6a/Atxn7l3/Actl6a/Kat2a/Mcrs1/Kansl1/Kansl3/Crebbp/Kat14/Taf4/Kat5/Epc1/Vps72/Ing3/Kat8/Brpf3/Tada2b/Taf9b/Kansl1l	24
CC	GO:0034708	methyltransferase complex	27/2101	110/28573	1.92929e-08	7.44919e-07	4.56936e-07	Hcfc1/Cbx5/Aebp2/Suz12/Kmt2a/Taf1/Snrpd3/Paxip1/Pelp1/Rnmt/Rbm15/Rbm15b/Cxxc1/Zc3h13/Epop/Mcrs1/Riok1/Kansl1/Jarid2/Taf4/Setd1a/Zfp335/Mettl3/Phf19/Kat8/N6amt1/Cbll1	27
CC	GO:0016514	SWI/SNF complex	13/2101	28/28573	2.32119e-08	8.49068e-07	5.20822e-07	Smarcc1/Smarca4/Arid1a/Pbrm1/Bcl11b/Smarcc2/Phf10/Actl6a/Dpf2/Arid1b/Smarcd1/Bcl7a/Smarca2	13
CC	GO:0031965	nuclear membrane	46/2101	263/28573	3.43367e-08	1.1932e-06	7.31913e-07	Canx/Tmpo/Tpr/Rangap1/Lmnb1/Ctnnb1/Ankrd17/Kpna4/Nup93/Trim27/Pom121/Nup133/Aen/Tmem97/Casc3/Emd/Dhx37/Rasa1/Apeh/Spin1/Dpy19l1/Tmem168/Rnf123/Lmnb2/Apc/Tnrc18/Tmem201/Eno1b/Brap/Brip1/Ptger4/Phf8/Epc1/Cnep1r1/Taf3/Dnajb12/Scai/Dpy19l3/Inpp4a/Tmx4/Repin1/Cep131/Retsat/Tmem120b/Cmtm3/Syne4	46
CC	GO:0071564	npBAF complex	9/2101	14/28573	8.80916e-08	2.91541e-06	1.78833e-06	Smarcc1/Smarca4/Arid1a/Smarcc2/Phf10/Actl6a/Arid1b/Smarcd1/Smarca2	9
CC	GO:0000428	DNA-directed RNA polymerase complex	24/2101	97/28573	9.90711e-08	3.0021e-06	1.8415e-06	Polr2a/Polr2m/Trrap/Psmc5/Taf1/Atxn7l3/Polr1c/Kat2a/Ctr9/Cdc73/Polr2g/Rpap1/Polr2f/Gtf2e2/Gtf2a1/Polr2d/Taf4/Tbpl1/Polrmt/Leo1/Taf3/Polr2j/Primpol/Taf9b	24
CC	GO:1902493	acetyltransferase complex	25/2101	104/28573	9.93501e-08	3.0021e-06	1.8415e-06	Hcfc1/Ogt/Trrap/Jade2/Msl2/Kat6a/Atxn7l3/Actl6a/Dlat/Kat2a/Mcrs1/Kansl1/Kansl3/Crebbp/Kat14/Taf4/Kat5/Epc1/Vps72/Ing3/Kat8/Brpf3/Tada2b/Taf9b/Kansl1l	25
CC	GO:0016591	RNA polymerase II, holoenzyme	20/2101	71/28573	1.14515e-07	3.30725e-06	2.02868e-06	Polr2a/Polr2m/Trrap/Psmc5/Taf1/Atxn7l3/Kat2a/Ctr9/Cdc73/Polr2g/Polr2f/Gtf2e2/Gtf2a1/Polr2d/Taf4/Tbpl1/Leo1/Taf3/Polr2j/Taf9b	20
CC	GO:0030139	endocytic vesicle	39/2101	214/28573	1.21101e-07	3.30725e-06	2.02868e-06	Myh9/Rab8b/Rapgef1/Rab7/Fmnl1/Ap2b1/Evl/Rab8a/Igf2r/Ctla4/Rab11b/Cd2ap/Flnb/Ap2a1/Slamf1/Was/Zyx/Vps26b/Kifc1/Ambra1/Tcirg1/Rab22a/Tbc1d5/Rab5b/Gipc1/Rin3/Myo18a/Vamp4/Heatr5a/Stam2/Stxbp3/Rab11fip3/Rab9/Stx8/Anxa11/Ehd3/Pip4p2/Rab23/Rab43	39
CC	GO:0000502	proteasome complex	19/2101	65/28573	1.23724e-07	3.30725e-06	2.02868e-06	Psme1/Ide/Psmb4/Psmd8/Psmd3/Psmc3/Psmd1/Psmb1/Psmc4/Psma6/Psmc5/Ubqln1/Psma5/Psmb2/Psmd12/Psmd4/Uchl5/Ubqln4/Psmf1	19
CC	GO:0000922	spindle pole	31/2101	150/28573	1.30211e-07	3.35173e-06	2.05597e-06	Calm3/Numa1/Cul3/Ik/Stag1/Mapk14/Nubp2/Git1/Nin/Dctn1/Nsmce1/Emd/Cep250/Hsf1/Kifc1/Kif2a/Ctdp1/Tmem201/Tubgcp6/Dctn4/Golga2/Psrc1/Kat5/Klhl21/Poc1b/Cep95/Cep44/Aunip/Plk2/Rmdn2/Map10	31
CC	GO:1905369	endopeptidase complex	22/2101	85/28573	1.42079e-07	3.47574e-06	2.13203e-06	Psme1/Ide/Psmb4/Psmd8/Psmd3/Psmc3/Psmd1/Psmb1/Psmc4/Psma6/Psmc5/Ubqln1/Psma5/Psmb2/Psmd12/Psmd4/Uchl5/Ubqln4/Pigt/Gpaa1/Pigs/Psmf1	22
CC	GO:0030880	RNA polymerase complex	24/2101	99/28573	1.50032e-07	3.47574e-06	2.13203e-06	Polr2a/Polr2m/Trrap/Psmc5/Taf1/Atxn7l3/Polr1c/Kat2a/Ctr9/Cdc73/Polr2g/Rpap1/Polr2f/Gtf2e2/Gtf2a1/Polr2d/Taf4/Tbpl1/Polrmt/Leo1/Taf3/Polr2j/Primpol/Taf9b	24
CC	GO:0031248	protein acetyltransferase complex	24/2101	99/28573	1.50032e-07	3.47574e-06	2.13203e-06	Hcfc1/Ogt/Trrap/Jade2/Msl2/Kat6a/Atxn7l3/Actl6a/Kat2a/Mcrs1/Kansl1/Kansl3/Crebbp/Kat14/Taf4/Kat5/Epc1/Vps72/Ing3/Kat8/Brpf3/Tada2b/Taf9b/Kansl1l	24
CC	GO:0001772	immunological synapse	16/2101	50/28573	3.06165e-07	6.86402e-06	4.21042e-06	Myh9/Arhgdia/Cd53/Prkar1a/Lat/Ezr/Pdcd6ip/Scrib/Nptn/Snx27/Dlg1/Alcam/Rhoh/Card11/Vav3/Cracr2a	16
CC	GO:0071565	nBAF complex	9/2101	16/28573	4.39445e-07	9.54419e-06	5.85445e-06	Smarcc1/Smarca4/Arid1a/Smarcc2/Dpf2/Arid1b/Smarcd1/Smarca2/Ss18l1	9
CC	GO:0098791	Golgi apparatus subcompartment	50/2101	323/28573	4.62403e-07	9.73848e-06	5.97362e-06	Flna/Rab10/Igf2r/Ap1g1/Ap1m1/Bcap31/Vrk1/Nucb1/Ap1b1/Ap3b1/Golga7/Gbf1/Man2a1/Nsf/Llgl1/Gnas/Rab6a/Gga1/Stx16/Chpf/Golga2/Atxn2/Tjap1/Slc30a7/Asap1/Trappc6b/Myo18a/Relch/Ndst1/Pik3c2a/Vamp4/Atp8a1/Golph3l/Trappc9/Tmbim4/Eipr1/Rab11fip3/Tmem230/Slc30a6/Stx8/Bet1/Golga1/Ccdc91/Bet1l/Chac1/Nsg2/Cracr2a/Arl5c/Atp7a/Fut7	50
CC	GO:0000118	histone deacetylase complex	21/2101	84/28573	5.09801e-07	1.04209e-05	6.39225e-06	Chd4/Cbx5/Mta2/Ogt/Trrap/Gatad2a/Mta1/Tbl1x/Ncor2/Hdac3/Jmjd1c/Sinhcaf/Rcor1/Arid4a/Arid4b/Kat5/Ing3/Znhit1/Hdac6/Hdac5/Hdac8	21
CC	GO:0017053	transcription repressor complex	20/2101	78/28573	6.11025e-07	1.21332e-05	7.44257e-06	Cbx5/Ctbp1/Ctnnb1/Jund/Tbl1x/Spen/Ncor2/Mdm2/Zfpm1/Hdac3/Ski/Rbbp8/Rcor1/Foxo3/Arid4a/Hdac5/H1f0/Lin52/Ctnnbip1/Gata1	20
CC	GO:1902562	H4 histone acetyltransferase complex	14/2101	41/28573	6.84459e-07	1.32139e-05	8.10544e-06	Hcfc1/Ogt/Trrap/Msl2/Actl6a/Mcrs1/Kansl1/Kansl3/Kat5/Epc1/Vps72/Ing3/Kat8/Kansl1l	14
CC	GO:0045335	phagocytic vesicle	25/2101	115/28573	7.71239e-07	1.44868e-05	8.88626e-06	Myh9/Rab8b/Rapgef1/Rab7/Fmnl1/Evl/Rab8a/Rab11b/Flnb/Slamf1/Was/Zyx/Vps26b/Ambra1/Tcirg1/Rab22a/Myo18a/Vamp4/Stxbp3/Rab9/Stx8/Anxa11/Pip4p2/Rab23/Rab43	25
CC	GO:0071013	catalytic step 2 spliceosome	24/2101	110/28573	1.18835e-06	2.17344e-05	1.3332e-05	Pabpc1/Srrm2/Hnrnpm/Hnrnpc/Sf3b2/Eftud2/Srrm1/Eif4a3/Sf3a1/Rbm8a/Snrpd3/Sf3a2/Dhx38/Cactin/Rbm22/Cwc15/Snw1/Lsm2/Isy1/Crnkl1/Tfip11/Slu7/Frg1/Wdr83	24
CC	GO:0098687	chromosomal region	54/2101	375/28573	1.65765e-06	2.95401e-05	1.812e-05	Rcc2/Dnmt1/Chd4/Cbx5/Ppp1ca/Baz1b/Tpr/Rangap1/Rad21/Mta2/Hjurp/Smarcc1/Smarca4/Upf1/Pbrm1/Zwint/Sec13/Smarcc2/Phf10/Fmr1/Ppp1r12a/Nup133/Clasp1/Actl6a/Suv39h1/Dctn1/Nsmce1/Ctc1/Phf2/Ngdn/Kansl1/Mtbp/Hsf1/Crebbp/Apc/Brca2/Tfip11/Slx4/Dctn4/Smarcd1/Kat5/Chmp5/Smg6/Cenpn/Kat8/Rad51d/Chmp6/Oip5/Ercc4/Nsmce2/Plk2/Fen1/Rnf8/Ss18l1	54
CC	GO:0005770	late endosome	41/2101	255/28573	1.81411e-06	3.15201e-05	1.93346e-05	Prkar1a/Mapk1/Sdf4/Rab7/Htt/Ankrd13a/Map2k2/Igf2r/Cst7/Myo5a/Vps26b/Derl2/Tcirg1/Chmp5/Slc29a3/Mon1b/Vta1/Vps8/Atp13a2/Chmp6/Rmc1/Clec16a/Tmem230/Exoc8/Micall1/Stard3nl/Rab9/Stx8/Tmem192/Vps18/Mvb12b/Pip4p2/Fyco1/Nsg2/Sla2/Atp7a/Ctsl/Snx16/Ticam2/Cd68/Cd1d1	41
CC	GO:0005774	vacuolar membrane	44/2101	283/28573	1.95454e-06	3.31061e-05	2.03074e-05	Rab7/Sec13/Sidt2/Abca2/Ap1g1/Ap1m1/Ap1b1/Vac14/Atp6v1b2/Rheb/Atp6v1f/Atp6v1h/Gabarap/Ncstn/Spag9/Tsc2/Mtmr2/Rptor/Atp6v1e1/Tcirg1/Flcn/Chmp5/Slc29a3/Slc48a1/Tfe3/Atp13a2/Tex264/Chmp6/Tecpr1/Clec16a/Tmem199/Tpcn1/Hgsnat/Slc37a3/Stx8/Tmem192/Slc39a8/Pip4p2/Abcd1/Atraid/Hps6/Gpr137/Gpr155/Cd68	44
CC	GO:0000139	Golgi membrane	42/2101	265/28573	2.00065e-06	3.31061e-05	2.03074e-05	Huwe1/Srgn/Ndfip1/B4galnt1/Notch1/Stk24/Bcap31/Scap/Mapk8ip3/Nucb1/Rab2a/Rheb/Man1a2/Golga7/Pitpnb/Ncstn/Lfng/Man2a1/Sec22b/Rab6a/Slc35c1/Ext2/Slc35b2/Fkrp/Golga2/Naa60/Asap1/Pomgnt1/Gba2/Slc35b3/Rab11fip3/Glce/Wasl/Gpsm1/Bet1/Inpp5e/Qsox1/Creb3/Bet1l/Lman2l/Cracr2a/B4galt4	42
CC	GO:0005874	microtubule	63/2101	467/28573	2.26592e-06	3.66236e-05	2.24651e-05	Rcc2/Fkbp4/Tubb4b/Nudc/Dync1h1/Calm3/Numa1/Kcnab2/Mta1/Cul3/Csnk1d/Dynll2/Map2k2/Dpp9/Akna/Pcnt/Clasp1/Bysl/Clip1/Nin/Dctn1/Emd/Gtse1/Ino80/Gsk3a/Dynlrb1/Map1s/Gabarap/Map3k11/Kifc1/Kif1c/Dlg1/Apc/Reep3/Kif2a/Bcl2l11/Tubgcp6/Selenos/Golga2/Kif1b/Psrc1/Camsap1/Chmp5/Synj1/Tiam1/Slain1/Srprb/Chmp6/Eml2/Cep170b/Hdac6/Klhl21/Ttll5/Kif13b/Ttl/Wdr47/Ttll3/Rab3d/Dnah17/Spry2/Dynlt1a/Rmdn2/Map10	63
CC	GO:0001650	fibrillar center	29/2101	154/28573	2.43455e-06	3.84549e-05	2.35884e-05	Tcof1/Ube2i/Ezr/Txnrd1/Smarca4/Acaca/Trim27/Wdr33/Prmt7/Mllt1/Akna/Rnmt/Pspc1/Polr1c/Cd2ap/Znrf2/Aff4/Mri1/Polr2f/Leo1/Mbd6/Coil/Cc2d1a/Mettl5/Btbd10/Lipa/Foxj2/Nfic/Ager	29
CC	GO:0000776	kinetochore	31/2101	171/28573	2.57231e-06	3.97278e-05	2.43692e-05	Cbx5/Tpr/Rangap1/Hjurp/Smarcc1/Smarca4/Pbrm1/Zwint/Sec13/Smarcc2/Phf10/Ppp1r12a/Nup133/Clasp1/Actl6a/Dctn1/Phf2/Kansl1/Mtbp/Hsf1/Crebbp/Apc/Dctn4/Smarcd1/Kat5/Chmp5/Cenpn/Kat8/Chmp6/Plk2/Ss18l1	31
CC	GO:0044545	NSL complex	7/2101	11/28573	2.91616e-06	4.40594e-05	2.70262e-05	Hcfc1/Ogt/Mcrs1/Kansl1/Kansl3/Kat8/Kansl1l	7
CC	GO:0072686	mitotic spindle	32/2101	181/28573	3.12141e-06	4.61571e-05	2.83129e-05	Rcc2/Tubb4b/Tpr/Rangap1/Wnk1/Nudc/Numa1/Diaph1/Cul3/Ik/Rtraf/Tbl1x/Stag1/Clasp1/Hdac3/Git1/Nin/Dctn1/Nsmce1/Kat2a/Cdc7/Map1s/Hsf1/Kifc1/Kat14/Golga2/Kat5/Flcn/Eml2/Cttn/Rmdn2/Map10	32
CC	GO:0016586	RSC-type complex	8/2101	15/28573	3.39424e-06	4.91458e-05	3.01462e-05	Suz12/Smarcc1/Smarca4/Pbrm1/Smarcc2/Phf10/Actl6a/Smarcd1	8
CC	GO:0055029	nuclear DNA-directed RNA polymerase complex	21/2101	94/28573	3.63736e-06	5.15912e-05	3.16462e-05	Polr2a/Polr2m/Trrap/Psmc5/Taf1/Atxn7l3/Polr1c/Kat2a/Ctr9/Cdc73/Polr2g/Polr2f/Gtf2e2/Gtf2a1/Polr2d/Taf4/Tbpl1/Leo1/Taf3/Polr2j/Taf9b	21
CC	GO:0030133	transport vesicle	52/2101	366/28573	3.81072e-06	5.29691e-05	3.24914e-05	Rab8b/Calm3/Bcl2l1/Rab10/Rab7/Sar1a/Sec13/Sec31a/Vdac3/Rab8a/Igf2r/Ap1g1/Ap1m1/Sec16a/Ap1b1/Rab2a/Rab11b/Pdcd6/Atp6v1b2/Madd/Unc13d/Atp6v1f/Atp6v1h/Myo5a/Ncstn/Dbi/Spg21/Sec22b/Tmem168/Dlg1/Apc/Mtmr2/Gnas/Rab6a/Stx16/Atp6v1e1/Atp6v1d/Synrg/Stxbp5/Rab5b/Gipc1/Atp8a1/Atp13a2/Snap47/Tmem230/Slc6a9/Slc4a8/Atp7a/Slc2a8/Rab3d/Slc18a2/Fgfrl1	52
CC	GO:0005802	trans-Golgi network	40/2101	254/28573	4.07064e-06	5.54725e-05	3.4027e-05	Flna/Rab10/Igf2r/Ap1g1/Ap1m1/Nucb1/Ap1b1/Ap3b1/Gbf1/Llgl1/Gnas/Rab6a/Gga1/Stx16/Atxn2/Tjap1/Asap1/Trappc6b/Myo18a/Relch/Ndst1/Pik3c2a/Vamp4/Atp8a1/Golph3l/Trappc9/Eipr1/Rab11fip3/Tmem230/Slc30a6/Stx8/Golga1/Ccdc91/Bet1l/Chac1/Nsg2/Cracr2a/Arl5c/Atp7a/Fut7	40
CC	GO:0140534	endoplasmic reticulum protein-containing complex	26/2101	135/28573	5.16634e-06	6.90501e-05	4.23556e-05	Hsp90b1/Mlec/Spcs2/Hsd17b12/Emc10/Ubxn1/Dad1/Sec11a/Pigt/Pigq/Gpaa1/Krtcap2/Sec61b/Ubxn7/Sec11c/Pigs/Tmem258/Derl2/Ext2/Selenos/Sptlc2/Elovl6/Srprb/Ormdl2/Sec61a2/Pigyl	26
CC	GO:0000932	P-body	20/2101	90/28573	6.70196e-06	8.78842e-05	5.39085e-05	Eif4enif1/Ago2/Psmc3/Psma6/Zc3h12d/Edc4/Pum1/Polr2g/Cnot3/Ago1/Lsm2/Patl1/Dcp1a/Xrn1/Pnrc2/Dcps/Lsm1/Zc3h12a/Mex3b/Nbdy	20
CC	GO:0035097	histone methyltransferase complex	18/2101	76/28573	7.44689e-06	9.58442e-05	5.87912e-05	Hcfc1/Cbx5/Aebp2/Suz12/Kmt2a/Taf1/Paxip1/Pelp1/Cxxc1/Epop/Mcrs1/Kansl1/Jarid2/Taf4/Setd1a/Zfp335/Phf19/Kat8	18
CC	GO:0000779	condensed chromosome, centromeric region	31/2101	182/28573	9.68996e-06	0.000122446	7.51088e-05	Cbx5/Tpr/Rangap1/Hjurp/Smarcc1/Smarca4/Pbrm1/Zwint/Sec13/Smarcc2/Phf10/Ppp1r12a/Nup133/Clasp1/Actl6a/Dctn1/Phf2/Kansl1/Mtbp/Hsf1/Crebbp/Apc/Dctn4/Smarcd1/Kat5/Chmp5/Cenpn/Kat8/Chmp6/Plk2/Ss18l1	31
CC	GO:0000151	ubiquitin ligase complex	49/2101	349/28573	9.91671e-06	0.000123073	7.54938e-05	Cand1/Cul3/Phc2/Traf7/Med12/Med1/Rmnd5a/Dcaf8/Rbx1/Bcor/Cks1b/Ube2j2/Fbxl14/Rnf40/Med24/Pdcd6/Fem1a/Dcaf15/Klhdc3/Ubr3/Brca2/Derl2/Ambra1/Rnf14/Brap/Rnf168/Fbxw5/Rchy1/Enc1/Ube2a/Kctd10/Dcun1d2/Med20/Dcaf10/Ercc8/Fbxo31/Fbxo8/Klhl21/Cbx2/Pcmtd1/Ring1/Fbxo7/Btrc/Fbxl18/Klhl25/Rnf144a/Rnf8/Spsb3/Fbxo17	49
CC	GO:0120114	Sm-like protein family complex	19/2101	85/28573	1.03285e-05	0.000125936	7.72495e-05	Sf3b2/Eftud2/Snrnp70/Sf3a1/Sf3b4/Snrpd3/Phf5a/Sf3a2/Fmr1/Zmat2/Hexim1/Lsm2/Prpf39/Mepce/Slu7/Lsm1/Gemin2/Lsm11/Prpf40b	19
CC	GO:0000775	chromosome, centromeric region	40/2101	266/28573	1.26218e-05	0.000151244	9.2774e-05	Rcc2/Dnmt1/Cbx5/Baz1b/Tpr/Rangap1/Rad21/Hjurp/Smarcc1/Smarca4/Pbrm1/Zwint/Sec13/Smarcc2/Phf10/Fmr1/Ppp1r12a/Nup133/Clasp1/Actl6a/Suv39h1/Dctn1/Nsmce1/Phf2/Ngdn/Kansl1/Mtbp/Hsf1/Crebbp/Apc/Dctn4/Smarcd1/Kat5/Chmp5/Cenpn/Kat8/Chmp6/Oip5/Plk2/Ss18l1	40
CC	GO:0005769	early endosome	49/2101	353/28573	1.35186e-05	0.000159245	9.76815e-05	Rcc2/Mapk1/Rapgef1/Htt/Wasf2/Map2k2/Usp10/Dnajc13/Igf2r/Ap1g1/Ap1m1/Snx1/Nucb1/Ap1b1/Ap3b1/Snx27/Mon2/Myo5a/Ncstn/Vps26b/Llgl1/Lmtk2/Gga1/Derl2/Rab22a/Rab5b/Rin3/Tgfbrap1/Tbc1d2b/Hps3/Vps8/Tmem230/Tpcn1/Stx8/Vps18/Mvb12b/Ehd3/Ticam1/Wdfy2/F8a/Nsg2/Hps6/Atp7a/Snx16/Ticam2/Tbc1d16/Sh3gl3/Apbb2/Cd1d1	49
CC	GO:0005938	cell cortex	44/2101	306/28573	1.51509e-05	0.000175497	0.000107651	Myh9/Tpm3/Actr2/Flna/Actn4/Capzb/Sptan1/Ndfip1/Ctbp1/Dync1h1/Ctnnb1/Cotl1/Numa1/Dbnl/Myo9b/Ptk2b/Cdc42se1/Map2k2/Actn1/Mark2/Clasp1/Lasp1/Clip1/Dctn1/Emd/Cd2ap/Axin1/Ppp1r9b/Stk39/Exoc6/Apc/Llgl1/Tmem201/Eno1b/Gipc1/Mpp1/Exoc8/Spire1/Wasl/Gpsm1/Arv1/Phldb1/Pard6g/Cttn	44
CC	GO:0030136	clathrin-coated vesicle	23/2101	119/28573	1.66561e-05	0.00018977	0.000116406	Rab8b/Htt/Ap2b1/Rab8a/Igf2r/Hax1/Ap1g1/Ap1m1/Bcap31/Ap1b1/Ctla4/Ap2a1/Unc13d/Spg21/Tnk2/Synrg/Tbc1d5/Pik3c2a/Dennd1a/Fcho2/Necap1/Cracr2a/Atp7a	23
CC	GO:0035060	brahma complex	7/2101	14/28573	2.48863e-05	0.000276954	0.000169885	Smarcc1/Arid1a/Smarcc2/Actl6a/Arid1b/Smarcd1/Smarca2	7
CC	GO:0071598	neuronal ribonucleoprotein granule	6/2101	10/28573	2.54463e-05	0.000276954	0.000169885	Hnrnpab/Eif4ebp2/Htt/Uhmk1/Fmr1/Arc	6
CC	GO:0042641	actomyosin	20/2101	98/28573	2.55037e-05	0.000276954	0.000169885	Lcp1/Myh9/Tpm3/Actn4/Ablim1/Pdcd6ip/Actn1/Coro1b/Flnb/Mprip/Zyx/Myo5a/Dctn4/Tlnrd1/Myo18a/Pdlim5/Fhl3/Sipa1l3/Vcl/Vangl2	20
CC	GO:0031252	cell leading edge	54/2101	415/28573	3.21944e-05	0.000344232	0.000211154	Pabpc1/Lcp1/Myh9/Actr2/Atf4/Tln1/Capzb/Ablim1/Ezr/Ctnnb1/Cd44/Dgkz/Vasp/Dbnl/Coro1c/Myo9b/Wasf2/Dock8/Diaph1/Ptk2b/Scrib/Evl/Hax1/Actn1/Dpp9/Coro1b/Mapk8ip3/Dctn1/Cd2ap/Atp6v1b2/Ppp1r9b/Abl1/Sra1/Myo5a/Gbf1/Rasa1/Acap2/Apc/Gnas/Adgre5/Prkci/Tiam1/Limk1/Hdac6/Exoc8/Wasl/Pacsin1/Inpp5e/Cyth3/Cdc42bpg/Atp7a/Dynlt1a/Cttn/Nradd	54
CC	GO:0010008	endosome membrane	44/2101	316/28573	3.36526e-05	0.000351099	0.000215366	Rcc2/Notch1/Rab7/Coro1c/Dnajc13/Rab8a/Igf2r/Abca2/Snx1/Rab11b/Vac14/Mon2/Ncdn/Pip5k1c/Acap2/Pacsin2/Llgl1/Mvb12a/Chmp5/Slc29a3/Tbc1d5/Slc48a1/Ubap1/Vamp4/Atp13a2/Zfyve27/Chmp6/Rmc1/Clec16a/Rab11fip3/Tpcn1/Micall1/Stard3nl/Stx8/Mvb12b/Ehd3/Pip4p2/Ticam1/Nsg2/Rab23/Zdhhc1/Atp7a/Snx16/Cd68	44
CC	GO:0005776	autophagosome	19/2101	92/28573	3.3847e-05	0.000351099	0.000215366	Ubqln1/Htt/Ubqln4/Aup1/Pip4k2b/Wipi2/Gabarap/Trp53inp1/Gaa/Chmp5/Tbc1d5/Atp13a2/Tex264/Chmp6/Tecpr1/Atg9b/Fyco1/Rab23/Trp53inp2	19
CC	GO:0000793	condensed chromosome	46/2101	337/28573	3.73004e-05	0.000381232	0.00023385	Cbx5/Baz1b/Tpr/Rangap1/Rad21/Hjurp/Smarcc1/Smarca4/Brd4/Pbrm1/Zwint/Nol6/Sec13/Rrs1/Smarcc2/Phf10/Ppp1r12a/Nup133/Clasp1/Actl6a/Dctn1/Nsmce1/Phf2/Kansl1/Mtbp/Hsf1/Crebbp/Apc/Brca2/Mlh1/Dctn4/Smarcd1/Kat5/Chmp5/Rad9a/Cenpn/Syce2/Kat8/Chmp6/Nsmce2/Plk2/Lig4/Ss18l1/Setmar/Msh5/Mei4	46
CC	GO:0005844	polysome	17/2101	78/28573	4.19845e-05	0.000422887	0.000259401	Rpl10a/Eif4g1/Rpl29/Larp1/Eif4h/Abcf1/Ago2/Psma6/Rpl6l/Fmr1/Fxr1/Pnpt1/Ago1/Unk/Atxn2/Impact/Rpl24	17
CC	GO:0022624	proteasome accessory complex	9/2101	25/28573	4.26983e-05	0.000423933	0.000260042	Psme1/Psmd8/Psmd3/Psmc3/Psmd1/Psmc4/Psmc5/Psmd12/Psmd4	9
CC	GO:0120111	neuron projection cytoplasm	13/2101	50/28573	4.75966e-05	0.00046591	0.000285791	Hnrnpab/Canx/Sfpq/Rangap1/Mapk1/Eif4ebp2/Htt/Uhmk1/Fmr1/Madd/Pura/Abhd12/Arc	13
CC	GO:0030532	small nuclear ribonucleoprotein complex	16/2101	72/28573	5.45141e-05	0.000526212	0.000322781	Sf3b2/Eftud2/Snrnp70/Sf3a1/Sf3b4/Snrpd3/Phf5a/Sf3a2/Zmat2/Hexim1/Lsm2/Prpf39/Mepce/Slu7/Lsm11/Prpf40b	16
CC	GO:0030658	transport vesicle membrane	30/2101	190/28573	5.88081e-05	0.000559886	0.000343436	Calm3/Bcl2l1/Rab10/Rab7/Sar1a/Sec13/Sec31a/Ap1g1/Ap1m1/Sec16a/Ap1b1/Rab2a/Rab11b/Pdcd6/Atp6v1b2/Atp6v1f/Atp6v1h/Sec22b/Dlg1/Apc/Stx16/Atp6v1e1/Atp6v1d/Synrg/Rab5b/Atp8a1/Snap47/Slc6a9/Slc4a8/Slc18a2	30
CC	GO:0035145	exon-exon junction complex	9/2101	26/28573	6.10498e-05	0.000573373	0.000351709	Thrap3/Eif4a3/Upf1/Rbm8a/Casc3/Pym1/Smg6/R3hcc1l/Tdrd3	9
CC	GO:0005925	focal adhesion	28/2101	173/28573	6.55252e-05	0.0006072	0.000372459	Lcp1/Myh9/Msn/Tln1/Actn4/Mapk1/Ezr/Vasp/Ptk2b/Map2k2/Evl/Actn1/Clasp1/Lasp1/Git1/Flnb/Itgb7/Zyx/Peak1/Zfp384/Arl14ep/Dctn4/Armc5/Limk1/Vcl/Cttn/Fes/Grb7	28
CC	GO:0005765	lysosomal membrane	34/2101	230/28573	7.71559e-05	0.000696407	0.000427179	Rab7/Sec13/Sidt2/Abca2/Ap1g1/Ap1m1/Ap1b1/Rheb/Ncstn/Spag9/Tsc2/Rptor/Flcn/Chmp5/Slc29a3/Slc48a1/Tfe3/Atp13a2/Chmp6/Tecpr1/Clec16a/Tpcn1/Hgsnat/Slc37a3/Stx8/Tmem192/Slc39a8/Pip4p2/Abcd1/Atraid/Hps6/Gpr137/Gpr155/Cd68	34
CC	GO:0098852	lytic vacuole membrane	34/2101	230/28573	7.71559e-05	0.000696407	0.000427179	Rab7/Sec13/Sidt2/Abca2/Ap1g1/Ap1m1/Ap1b1/Rheb/Ncstn/Spag9/Tsc2/Rptor/Flcn/Chmp5/Slc29a3/Slc48a1/Tfe3/Atp13a2/Chmp6/Tecpr1/Clec16a/Tpcn1/Hgsnat/Slc37a3/Stx8/Tmem192/Slc39a8/Pip4p2/Abcd1/Atraid/Hps6/Gpr137/Gpr155/Cd68	34
CC	GO:0032432	actin filament bundle	19/2101	98/28573	8.3914e-05	0.000746074	0.000457645	Lcp1/Myh9/Tpm3/Flna/Actn4/Ablim1/Actn1/Coro1b/Flnb/Mprip/Zyx/Dctn4/Tlnrd1/Pdlim5/Fhl3/Sipa1l3/Rflnb/Vcl/Vangl2	19
CC	GO:0097346	INO80-type complex	9/2101	27/28573	8.5615e-05	0.000746074	0.000457645	Trrap/Yy1/Uchl5/Actl6a/Mcrs1/Ino80/Kat5/Ing3/Znhit1	9
CC	GO:1902554	serine/threonine protein kinase complex	22/2101	123/28573	8.58791e-05	0.000746074	0.000457645	Prkar1a/Ccng1/Psmc5/Brd4/Ccnl1/Med12/Ikbkb/Cks1b/Cdk13/Cdkn1a/Prkar2a/Ccnt2/Snw1/Ccnk/Prkaca/Rb1/Tbc1d5/Prkci/Cdk10/Prkab2/Prkar2b/Acvr2a	22
CC	GO:0071005	U2-type precatalytic spliceosome	14/2101	60/28573	8.95698e-05	0.000768531	0.00047142	Srrm2/Sf3b2/Eftud2/Sf3a1/Sf3b4/Ik/Snrpd3/Phf5a/Sf3a2/Zmat2/Lsm2/Wbp4/Mfap1a/Rnf113a2	14
CC	GO:0030055	cell-substrate junction	29/2101	187/28573	0.000107352	0.000909877	0.000558122	Lcp1/Myh9/Msn/Tln1/Actn4/Mapk1/Ezr/Vasp/Ptk2b/Erbin/Map2k2/Evl/Actn1/Clasp1/Lasp1/Git1/Flnb/Itgb7/Zyx/Peak1/Zfp384/Arl14ep/Dctn4/Armc5/Limk1/Vcl/Cttn/Fes/Grb7	29
CC	GO:0010494	cytoplasmic stress granule	17/2101	84/28573	0.000112226	0.000939722	0.000576429	Pabpc1/Eif4g1/G3bp1/Eif3b/Larp1/Pabpc4/Khsrp/Fmr1/Fxr1/Pum1/Tia1/Rptor/Rc3h2/Atxn2/Dyrk3/Rbm4/Grb7	17
CC	GO:0019908	nuclear cyclin-dependent protein kinase holoenzyme complex	7/2101	17/28573	0.0001158	0.000958104	0.000587705	Brd4/Med12/Cdk13/Ccnt2/Snw1/Ccnk/Rb1	7
CC	GO:0000791	euchromatin	15/2101	69/28573	0.000120359	0.000984111	0.000603658	Trim28/Polr2a/Ogt/Smarca4/Ctnnb1/Exosc10/Rrp1b/Pelp1/Ice1/Ctr9/Aff4/Hsf1/Setd1a/Cbx2/H1f0	15
CC	GO:0030120	vesicle coat	14/2101	62/28573	0.000130696	0.00104407	0.000640435	Ap2b1/Sar1a/Sec13/Sec31a/Copz1/Ap1g1/Ap1m1/Ap1b1/Ap2a1/Pdcd6/Scyl1/Synrg/Tbc1d5/Necap1	14
CC	GO:0071011	precatalytic spliceosome	14/2101	62/28573	0.000130696	0.00104407	0.000640435	Srrm2/Sf3b2/Eftud2/Sf3a1/Sf3b4/Ik/Snrpd3/Phf5a/Sf3a2/Zmat2/Lsm2/Wbp4/Mfap1a/Rnf113a2	14
CC	GO:0032279	asymmetric synapse	51/2101	407/28573	0.000137453	0.00108557	0.000665892	Rpl10a/Atp1a1/Chd4/Pcbp1/Hnrnpm/Phb2/Pcbp2/Capzb/Ablim1/Mapk1/Ogt/Pak2/Ctnnb1/Dgkz/Dbnl/Kcnab2/Nefh/Rnf10/Ptk2b/Dynll2/Scrib/Nptn/Fabp5/Fmr1/Rab8a/Fxr1/Snx1/Drosha/Ppp1r9b/Dgcr8/Rheb/Pip5k1c/Tsc2/Dlg1/Mtmr2/Nr3c1/Pura/Tiam1/Pdlim5/Snap47/Bcr/Neto2/Crtc1/Inpp4a/Pacsin1/Slc6a9/Slc4a8/Grik5/Dclk1/Arc/Sh3gl3	51
CC	GO:0030662	coated vesicle membrane	18/2101	94/28573	0.000150573	0.00117133	0.000718502	Ap2b1/Sar1a/Sec13/Sec31a/Copz1/Ap1g1/Ap1m1/Sec16a/Ap1b1/Ap2a1/Pdcd6/Sec22b/Scyl1/Synrg/Tbc1d5/Tmem199/Dennd1a/Necap1	18
CC	GO:0005838	proteasome regulatory particle	8/2101	23/28573	0.000151684	0.00117133	0.000718502	Psmd8/Psmd3/Psmc3/Psmd1/Psmc4/Psmc5/Psmd12/Psmd4	8
CC	GO:0030427	site of polarized growth	32/2101	221/28573	0.000182154	0.00139117	0.000853352	Tpm3/Ywhae/Fkbp4/Flna/Calm3/Cotl1/Dbnl/Ptk2b/Fmr1/Fxr1/Git1/Nin/Ppp1r9b/Orai1/Abl1/Tsc2/Apc/Lmtk2/Tnk2/Eno1b/Tiam1/Csnk1e/Zfyve27/Limk1/Hdac5/Ptbp2/Wdr47/Dclk1/Itga3/Trpm1/Dynlt1a/Cttn	32
CC	GO:0071782	endoplasmic reticulum tubular network	9/2101	30/28573	0.000213648	0.00161397	0.000990018	Rab10/Emd/Reep3/Tmem201/Lnpk/Zfyve27/Rnf41/Parp6/Arv1	9
CC	GO:0014069	postsynaptic density	48/2101	384/28573	0.000225125	0.00168133	0.00103133	Rpl10a/Atp1a1/Pcbp1/Hnrnpm/Phb2/Pcbp2/Capzb/Ablim1/Mapk1/Pak2/Ctnnb1/Dgkz/Dbnl/Kcnab2/Nefh/Rnf10/Ptk2b/Dynll2/Scrib/Nptn/Fabp5/Fmr1/Rab8a/Fxr1/Snx1/Drosha/Ppp1r9b/Dgcr8/Rheb/Pip5k1c/Tsc2/Dlg1/Mtmr2/Nr3c1/Pura/Tiam1/Pdlim5/Snap47/Bcr/Neto2/Crtc1/Inpp4a/Pacsin1/Slc6a9/Grik5/Dclk1/Arc/Sh3gl3	48
CC	GO:0005798	Golgi-associated vesicle	18/2101	97/28573	0.000227403	0.00168133	0.00103133	Rab8b/Pi4ka/Copz1/Rab8a/Igf2r/Ap1g1/Ap1m1/Nucb1/Ap1b1/Spg21/Sec22b/Gnas/Scyl1/Synrg/Tmem199/Pacsin1/Bet1l/Atp7a	18
CC	GO:0001725	stress fiber	17/2101	89/28573	0.000234542	0.00169799	0.00104155	Lcp1/Myh9/Tpm3/Actn4/Ablim1/Actn1/Coro1b/Flnb/Mprip/Zyx/Dctn4/Tlnrd1/Pdlim5/Fhl3/Sipa1l3/Vcl/Vangl2	17
CC	GO:0097517	contractile actin filament bundle	17/2101	89/28573	0.000234542	0.00169799	0.00104155	Lcp1/Myh9/Tpm3/Actn4/Ablim1/Actn1/Coro1b/Flnb/Mprip/Zyx/Dctn4/Tlnrd1/Pdlim5/Fhl3/Sipa1l3/Vcl/Vangl2	17
CC	GO:0030117	membrane coat	18/2101	98/28573	0.000259687	0.00184166	0.00112968	Ap2b1/Sar1a/Sec13/Sec31a/Copz1/Igf2r/Ap1g1/Ap1m1/Ap1b1/Ap3b1/Ap2a1/Pdcd6/Scyl1/Synrg/Tbc1d5/Synj1/Vps18/Necap1	18
CC	GO:0048475	coated membrane	18/2101	98/28573	0.000259687	0.00184166	0.00112968	Ap2b1/Sar1a/Sec13/Sec31a/Copz1/Igf2r/Ap1g1/Ap1m1/Ap1b1/Ap3b1/Ap2a1/Pdcd6/Scyl1/Synrg/Tbc1d5/Synj1/Vps18/Necap1	18
CC	GO:0005665	RNA polymerase II, core complex	6/2101	14/28573	0.000281243	0.00193529	0.00118711	Polr2a/Polr2m/Polr2g/Polr2f/Polr2d/Polr2j	6
CC	GO:0045293	mRNA editing complex	6/2101	14/28573	0.000281243	0.00193529	0.00118711	Hnrnpab/Rbm15/Rbm15b/Zc3h13/Mettl3/Cbll1	6
CC	GO:0140288	GBAF complex	6/2101	14/28573	0.000281243	0.00193529	0.00118711	Smarcc1/Smarca4/Actl6a/Smarcd1/Bcl7a/Smarca2	6
CC	GO:0005884	actin filament	22/2101	134/28573	0.000308508	0.00210209	0.00128943	Lcp1/Myh9/Tpm3/Flna/Ezr/Cotl1/Dbnl/Myo9b/Diaph1/Actn1/Mark2/Coro1b/Cd2ap/Was/Myo5a/Tpm3-rs7/Specc1l/Pdlim5/Vps18/Whrn/Vcl/Cttn	22
CC	GO:0031312	extrinsic component of organelle membrane	10/2101	38/28573	0.00031655	0.00213595	0.0013102	Snx1/Nucb1/Atp6v1b2/Atp6v1f/Atp6v1h/Noa1/Atp6v1e1/Atp6v1d/Stxbp5/Snx16	10
CC	GO:1902911	protein kinase complex	24/2101	154/28573	0.000375726	0.00250587	0.00153711	Prkar1a/Ccng1/Psmc5/Brd4/Ccnl1/Med12/Ikbkb/Cks1b/Cdk13/Cdkn1a/Prkar2a/Ccnt2/Snw1/Ccnk/Prkaca/Rb1/Tbc1d5/Prkci/Prkag2/Prkag1/Cdk10/Prkab2/Prkar2b/Acvr2a	24
CC	GO:0032588	trans-Golgi network membrane	12/2101	53/28573	0.000378584	0.00250587	0.00153711	Ap1g1/Ap1m1/Ap1b1/Llgl1/Gnas/Asap1/Ndst1/Rab11fip3/Slc30a6/Nsg2/Cracr2a/Atp7a	12
CC	GO:0033180	proton-transporting V-type ATPase, V1 domain	5/2101	10/28573	0.000393878	0.00255837	0.00156931	Atp6v1b2/Atp6v1f/Atp6v1h/Atp6v1e1/Atp6v1d	5
CC	GO:0140092	bBAF complex	5/2101	10/28573	0.000393878	0.00255837	0.00156931	Smarca4/Arid1a/Smarcc2/Arid1b/Smarca2	5
CC	GO:0015030	Cajal body	10/2101	39/28573	0.000397891	0.0025605	0.00157062	Srrm2/Eftud2/Fmr1/Ice1/Angel2/Uspl1/Ak6/Hinfp/Coil/Oip5	10
CC	GO:0071004	U2-type prespliceosome	6/2101	15/28573	0.00043961	0.00277754	0.00170375	U2af2/Snrnp70/Sf3a1/Sf3a2/Prpf39/Prpf40b	6
CC	GO:0071010	prespliceosome	6/2101	15/28573	0.00043961	0.00277754	0.00170375	U2af2/Snrnp70/Sf3a1/Sf3a2/Prpf39/Prpf40b	6
CC	GO:0036064	ciliary basal body	27/2101	184/28573	0.000451655	0.00282793	0.00173466	Psmb4/Ezr/Akt1/Csnk1d/Rab8a/Cdc45/Pcnt/Dctn1/Cep250/Ift52/Arhgap35/Hdac6/Poc1b/Cep78/Cdk10/Ttll5/Alms1/Whrn/Cetn4/Tbc1d30/Mks1/Nphp4/Cep131/Bbs2/Dnaaf2/B9d1/Rilpl1	27
CC	GO:0097431	mitotic spindle pole	10/2101	40/28573	0.000495884	0.00307714	0.00188753	Numa1/Ik/Stag1/Git1/Nin/Nsmce1/Hsf1/Kat5/Rmdn2/Map10	10
CC	GO:0090734	site of DNA damage	19/2101	112/28573	0.000507454	0.00312107	0.00191447	Chd4/Actr2/Cbx5/Parp1/Ubqln4/Was/Uimc1/Rnf168/Kat5/Epc1/Helq/Rnf169/Smarcal1/Polk/Aunip/Xpc/Shld2/Rnf8/Setmar	19
CC	GO:0005795	Golgi stack	17/2101	95/28573	0.000521717	0.00318065	0.00195102	Bcap31/Vrk1/Nucb1/Golga7/Gbf1/Man2a1/Nsf/Llgl1/Stx16/Chpf/Golga2/Slc30a7/Golph3l/Tmbim4/Bet1/Bet1l/Nsg2	17
CC	GO:0030904	retromer complex	7/2101	21/28573	0.000532994	0.00322114	0.00197586	Rab7/Trim27/Snx1/Dctn1/Snx27/Vps26b/Tbc1d5	7
CC	GO:0030134	COPII-coated ER to Golgi transport vesicle	12/2101	55/28573	0.000542952	0.00325303	0.00199542	Sar1a/Tmed5/Sec13/Sec31a/Sec16a/Pdcd6/Ergic1/Sec22b/Golga2/Cnih4/Lman2l/Vangl2	12
CC	GO:1905348	endonuclease complex	10/2101	41/28573	0.000613061	0.00364169	0.00223383	Ago2/Tsn/Drosha/Dgcr8/Ago1/Pop4/Slx4/Tsen34/Rpp25l/Rad51c	10
CC	GO:0099572	postsynaptic specialization	51/2101	436/28573	0.000705507	0.00415532	0.00254889	Rpl10a/Atp1a1/Pcbp1/Hnrnpm/Srgn/Phb2/Pcbp2/Capzb/Ablim1/Mapk1/Pak2/Ctnnb1/Dgkz/Dbnl/Kcnab2/Nefh/Rnf10/Ptk2b/Dynll2/Erbin/Scrib/Nptn/Fabp5/Fmr1/Rab8a/Fxr1/Snx1/Drosha/Ppp1r9b/Dgcr8/Rheb/Pip5k1c/Tsc2/Dlg1/Mtmr2/Nr3c1/Akap1/Pura/Tiam1/Pdlim5/Snap47/Bcr/Neto2/Crtc1/Inpp4a/Pacsin1/Slc6a9/Grik5/Dclk1/Arc/Sh3gl3	51
CC	GO:0032806	carboxy-terminal domain protein kinase complex	7/2101	22/28573	0.000732387	0.00426339	0.00261518	Psmc5/Brd4/Cdk13/Ccnt2/Snw1/Ccnk/Rb1	7
CC	GO:0008021	synaptic vesicle	34/2101	259/28573	0.000736125	0.00426339	0.00261518	Rab8b/Calm3/Bcl2l1/Rab10/Rab7/Vdac3/Rab8a/Rab2a/Rab11b/Atp6v1b2/Madd/Atp6v1f/Atp6v1h/Myo5a/Ncstn/Dbi/Sec22b/Dlg1/Apc/Mtmr2/Stx16/Atp6v1e1/Atp6v1d/Stxbp5/Rab5b/Gipc1/Atp8a1/Snap47/Tmem230/Slc6a9/Slc4a8/Slc2a8/Rab3d/Slc18a2	34
CC	GO:0098984	neuron to neuron synapse	52/2101	448/28573	0.000751418	0.00431599	0.00264745	Rpl10a/Atp1a1/Chd4/Pcbp1/Hnrnpm/Phb2/Pcbp2/Capzb/Ablim1/Mapk1/Ogt/Pak2/Ctnnb1/Dgkz/Dbnl/Kcnab2/Nefh/Rnf10/Ptk2b/Dynll2/Scrib/Nptn/Fabp5/Fmr1/Rab8a/Fxr1/Snx1/Drosha/Ppp1r9b/Dgcr8/Rheb/Pip5k1c/Tsc2/Dlg1/Mtmr2/Nr3c1/Stxbp5/Pura/Tiam1/Pdlim5/Snap47/Bcr/Neto2/Crtc1/Inpp4a/Pacsin1/Slc6a9/Slc4a8/Grik5/Dclk1/Arc/Sh3gl3	52
CC	GO:0000307	cyclin-dependent protein kinase holoenzyme complex	12/2101	57/28573	0.000763476	0.00434931	0.00266788	Ccng1/Brd4/Ccnl1/Med12/Cks1b/Cdk13/Cdkn1a/Ccnt2/Snw1/Ccnk/Rb1/Cdk10	12
CC	GO:0016328	lateral plasma membrane	14/2101	73/28573	0.000776405	0.004387	0.00269101	Myh9/Atp1a1/Sptan1/Ctnnb1/Coro1c/Mark2/Axin1/Tbcd/Dlg1/Apc/Pkd1/Slc6a9/Cldn12/Vangl2	14
CC	GO:0070382	exocytic vesicle	36/2101	281/28573	0.000823316	0.00461455	0.00283059	Rab8b/Calm3/Bcl2l1/Rab10/Rab7/Vdac3/Rab8a/Rab2a/Rab11b/Atp6v1b2/Madd/Unc13d/Atp6v1f/Atp6v1h/Myo5a/Ncstn/Dbi/Sec22b/Dlg1/Apc/Mtmr2/Rab6a/Stx16/Atp6v1e1/Atp6v1d/Stxbp5/Rab5b/Gipc1/Atp8a1/Snap47/Tmem230/Slc6a9/Slc4a8/Slc2a8/Rab3d/Slc18a2	36
CC	GO:0002102	podosome	8/2101	29/28573	0.000892453	0.00496204	0.00304373	Lcp1/Tpm3/Actr2/Dbnl/Bin2/Asap1/Vcl/Cttn	8
CC	GO:0016592	mediator complex	9/2101	36/28573	0.000941013	0.00519051	0.00318388	Thrap3/Med12/Med1/Med24/Med25/Med16/Med20/Med26/Med12l	9
CC	GO:0010369	chromocenter	6/2101	17/28573	0.000956427	0.00523399	0.00321055	Cbx5/Fmr1/Mbd6/Oip5/Scmh1/Trim66	6
CC	GO:0030426	growth cone	29/2101	213/28573	0.000979728	0.00531961	0.00326307	Tpm3/Ywhae/Fkbp4/Flna/Calm3/Ptk2b/Fmr1/Fxr1/Git1/Nin/Ppp1r9b/Orai1/Abl1/Tsc2/Apc/Lmtk2/Tnk2/Eno1b/Tiam1/Csnk1e/Zfyve27/Limk1/Hdac5/Ptbp2/Wdr47/Dclk1/Itga3/Dynlt1a/Cttn	29
CC	GO:0030118	clathrin coat	11/2101	51/28573	0.00101251	0.005455	0.00334612	Ap2b1/Igf2r/Ap1g1/Ap1m1/Ap1b1/Ap3b1/Ap2a1/Synrg/Tbc1d5/Synj1/Necap1	11
CC	GO:0000228	nuclear chromosome	37/2101	295/28573	0.00104204	0.0055709	0.00341721	Hcfc1/Mcm2/Baz1b/Rad21/Parp1/Ogt/Smarca4/Pole/Trrap/Brd4/Yy1/Ik/Pold2/Nol6/Uchl5/Rrs1/Cdc45/Carm1/Actl6a/Mcrs1/Ino80/Sinhcaf/Brca2/Gins4/Mlh1/Arid4a/Slx4/Arid4b/Kat5/Rad9a/Syce2/Ing3/Znhit1/Smarcal1/Xpa/Msh5/Mei4	37
CC	GO:0005814	centriole	21/2101	137/28573	0.00105186	0.00558047	0.00342309	Htt/Akna/Pcnt/Nin/Dctn1/Cep250/Kif2a/Tedc1/Ift52/Cep76/Cep104/Cep63/Poc1b/Cep78/Cep44/Alms1/Plk2/Cetn4/Mks1/Cntln/Nphp4	21
CC	GO:0001726	ruffle	23/2101	156/28573	0.00107702	0.00566702	0.00347617	Lcp1/Myh9/Tln1/Ezr/Dbnl/Myo9b/Wasf2/Diaph1/Actn1/Cd2ap/Atp6v1b2/Ppp1r9b/Abl1/Myo5a/Rasa1/Acap2/Apc/Gnas/Tiam1/Pacsin1/Inpp5e/Cyth3/Cttn	23
CC	GO:0043073	germ cell nucleus	18/2101	110/28573	0.0010866	0.00566702	0.00347617	Dnmt1/Hmgn2/Smarcc1/Smarca4/Ankrd17/Dazap1/Kpna4/Tsn/Patz1/Chtf18/Mlh1/Taf4/Tbpl1/Taf3/Haspin/Coil/Limk1/Scmh1	18
CC	GO:0008540	proteasome regulatory particle, base subcomplex	5/2101	12/28573	0.00109263	0.00566702	0.00347617	Psmc3/Psmd1/Psmc4/Psmc5/Psmd4	5
CC	GO:0030140	trans-Golgi network transport vesicle	9/2101	37/28573	0.00116326	0.00598866	0.00367347	Rab8b/Rab8a/Igf2r/Ap1g1/Ap1m1/Ap1b1/Spg21/Synrg/Atp7a	9
CC	GO:0031519	PcG protein complex	11/2101	52/28573	0.00120002	0.00613243	0.00376166	Aebp2/Suz12/Ubap2l/Yy1/Phc2/Kdm2b/Epop/Jarid2/Phf19/Cbx2/Ring1	11
CC	GO:0019898	extrinsic component of membrane	30/2101	227/28573	0.00131075	0.00664945	0.0040788	Atp2a2/Ctbp1/Ctnnb1/Kcnab2/Rnf10/Ap2b1/Scrib/Snx1/Nucb1/Esyt2/Gng5/Vac14/Crkl/Atp6v1b2/Atp6v1f/Atp6v1h/Wipi2/Apc/Noa1/Gnas/Atp6v1e1/Vps13d/Atp6v1d/Stxbp5/Tiam1/Pik3c2a/Sla2/Wdr45/Snx16/Gngt2	30
CC	GO:0071339	MLL1 complex	8/2101	31/28573	0.00143764	0.00724031	0.00444124	Hcfc1/Kmt2a/Taf1/Pelp1/Mcrs1/Kansl1/Taf4/Kat8	8
CC	GO:0005643	nuclear pore	14/2101	78/28573	0.00152334	0.00761669	0.00467211	Nup210/Tpr/Rangap1/Ube2i/Kpna4/Nup188/Nup93/Pom121/Xpo7/Sec13/Nup214/Nup133/Chmp5/Chmp6	14
CC	GO:0001673	male germ cell nucleus	15/2101	87/28573	0.0016034	0.00795972	0.00488252	Smarcc1/Smarca4/Ankrd17/Dazap1/Kpna4/Tsn/Patz1/Chtf18/Mlh1/Taf4/Tbpl1/Taf3/Haspin/Limk1/Scmh1	15
CC	GO:0000109	nucleotide-excision repair complex	5/2101	13/28573	0.00166842	0.00805244	0.0049394	Slx4/Ercc8/Ercc4/Xpc/Xpa	5
CC	GO:0005677	chromatin silencing complex	5/2101	13/28573	0.00166842	0.00805244	0.0049394	Suz12/Yy1/Suv39h1/Rb1/Bahd1	5
CC	GO:0030877	beta-catenin destruction complex	5/2101	13/28573	0.00166842	0.00805244	0.0049394	Ctnnb1/Axin1/Gsk3a/Apc/Ctnnbip1	5
CC	GO:0060187	cell pole	5/2101	13/28573	0.00166842	0.00805244	0.0049394	Msn/Rab8b/Ezr/Trpm1/Vangl2	5
CC	GO:0044665	MLL1/2 complex	8/2101	32/28573	0.00179476	0.00860246	0.00527679	Hcfc1/Kmt2a/Taf1/Pelp1/Mcrs1/Kansl1/Taf4/Kat8	8
CC	GO:0005847	mRNA cleavage and polyadenylation specificity factor complex	6/2101	19/28573	0.00184562	0.00878563	0.00538914	Sympk/Cpsf1/Nudt21/Wdr33/Fip1l1/Zc3h3	6
CC	GO:0097525	spliceosomal snRNP complex	12/2101	63/28573	0.00191353	0.00904695	0.00554943	Sf3b2/Eftud2/Snrnp70/Sf3a1/Sf3b4/Snrpd3/Phf5a/Sf3a2/Zmat2/Lsm2/Prpf39/Prpf40b	12
CC	GO:0070847	core mediator complex	7/2101	26/28573	0.00217833	0.0102293	0.0062747	Med1/Med24/Med15/Med25/Med16/Med20/Med26	7
CC	GO:0005657	replication fork	14/2101	81/28573	0.00220756	0.0102822	0.00630716	Dnmt1/Baz1b/Parp1/Rfc5/Pold2/Carm1/Rad51d/Smarcal1/Tex264/Xrcc3/Primpol/Xpa/Bcl6/Rad51c	14
CC	GO:0009295	nucleoid	10/2101	48/28573	0.00223398	0.0102822	0.00630716	Shmt2/Atad3a/Hadha/Dhx30/Tfam/Polg/Grsf1/Hadhb/Polrmt/Mterf1a	10
CC	GO:0042645	mitochondrial nucleoid	10/2101	48/28573	0.00223398	0.0102822	0.00630716	Shmt2/Atad3a/Hadha/Dhx30/Tfam/Polg/Grsf1/Hadhb/Polrmt/Mterf1a	10
CC	GO:0045240	dihydrolipoyl dehydrogenase complex	5/2101	14/28573	0.00243907	0.0110795	0.00679618	Ogdh/Dlst/Dlat/Kat2a/Bckdk	5
CC	GO:0097550	transcription preinitiation complex	5/2101	14/28573	0.00243907	0.0110795	0.00679618	Polr2m/Rprd1b/Gtf2a1/Brf1/Rprd1a	5
CC	GO:0031616	spindle pole centrosome	6/2101	20/28573	0.00247404	0.0110933	0.00680465	Numa1/Nubp2/Emd/Cep250/Kifc1/Tmem201	6
CC	GO:0032580	Golgi cisterna membrane	6/2101	20/28573	0.00247404	0.0110933	0.00680465	Bcap31/Nucb1/Chpf/Golga2/Slc30a7/Nsg2	6
CC	GO:0030863	cortical cytoskeleton	18/2101	119/28573	0.00268695	0.0119707	0.00734287	Myh9/Tpm3/Actr2/Flna/Actn4/Capzb/Sptan1/Cotl1/Numa1/Dbnl/Actn1/Clasp1/Lasp1/Ppp1r9b/Llgl1/Mpp1/Wasl/Cttn	18
CC	GO:0030125	clathrin vesicle coat	8/2101	34/28573	0.00271654	0.0120255	0.00737647	Ap2b1/Ap1g1/Ap1m1/Ap1b1/Ap2a1/Synrg/Tbc1d5/Necap1	8
CC	GO:0030131	clathrin adaptor complex	7/2101	27/28573	0.00275635	0.0121244	0.00743719	Ap2b1/Ap1g1/Ap1m1/Ap1b1/Ap3b1/Ap2a1/Tbc1d5	7
CC	GO:0005686	U2 snRNP	6/2101	21/28573	0.00325045	0.0141192	0.00866075	Sf3b2/Sf3a1/Sf3b4/Snrpd3/Phf5a/Sf3a2	6
CC	GO:0045239	tricarboxylic acid cycle enzyme complex	6/2101	21/28573	0.00325045	0.0141192	0.00866075	Ogdh/Dlst/Suclg1/Dlat/Kat2a/Bckdk	6
CC	GO:1902555	endoribonuclease complex	8/2101	35/28573	0.0032979	0.0142363	0.00873258	Ago2/Tsn/Drosha/Dgcr8/Ago1/Pop4/Tsen34/Rpp25l	8
CC	GO:0000137	Golgi cis cisterna	5/2101	15/28573	0.00343881	0.0145993	0.00895525	Llgl1/Golga2/Slc30a7/Bet1/Nsg2	5
CC	GO:0005868	cytoplasmic dynein complex	7/2101	28/28573	0.00344501	0.0145993	0.00895525	Tpr/Dync1h1/Dynll2/Dctn1/Dynlrb1/Dctn4/Dynlt1a	7
CC	GO:0033176	proton-transporting V-type ATPase complex	7/2101	28/28573	0.00344501	0.0145993	0.00895525	Atp6v1b2/Atp6v1f/Atp6v1h/Atp6v1e1/Tcirg1/Atp6v1d/Tmem199	7
CC	GO:0099023	vesicle tethering complex	12/2101	68/28573	0.00371858	0.0156631	0.00960782	Trappc10/Exoc6/Cog8/Trappc6b/Tgfbrap1/Cog1/Vps8/Trappc9/Eipr1/Exoc8/Cog7/Vps18	12
CC	GO:0005876	spindle microtubule	13/2101	77/28573	0.00385529	0.0161411	0.00990102	Calm3/Numa1/Cul3/Csnk1d/Clasp1/Map1s/Kif2a/Psrc1/Chmp5/Chmp6/Klhl21/Ttl/Rmdn2	13
CC	GO:0051286	cell tip	4/2101	10/28573	0.00426898	0.0177661	0.0108978	Msn/Rab8b/Ezr/Trpm1	4
CC	GO:0005852	eukaryotic translation initiation factor 3 complex	5/2101	16/28573	0.00470202	0.0193367	0.0118612	Eif3b/Eif3i/Eif3f/Eif3k/Eif3g	5
CC	GO:0031011	Ino80 complex	5/2101	16/28573	0.00470202	0.0193367	0.0118612	Yy1/Uchl5/Actl6a/Mcrs1/Ino80	5
CC	GO:0000974	Prp19 complex	6/2101	23/28573	0.00532706	0.0215251	0.0132036	U2af2/Polr2a/Rbm22/Cwc15/Isy1/Crnkl1	6
CC	GO:0012507	ER to Golgi transport vesicle membrane	6/2101	23/28573	0.00532706	0.0215251	0.0132036	Sar1a/Sec13/Sec31a/Sec16a/Pdcd6/Sec22b	6
CC	GO:0016471	vacuolar proton-transporting V-type ATPase complex	6/2101	23/28573	0.00532706	0.0215251	0.0132036	Atp6v1b2/Atp6v1f/Atp6v1h/Atp6v1e1/Tcirg1/Tmem199	6
CC	GO:0030672	synaptic vesicle membrane	20/2101	147/28573	0.00559984	0.0222444	0.0136448	Calm3/Bcl2l1/Rab10/Rab7/Rab2a/Rab11b/Atp6v1b2/Atp6v1f/Atp6v1h/Dlg1/Apc/Stx16/Atp6v1e1/Atp6v1d/Rab5b/Atp8a1/Snap47/Slc6a9/Slc4a8/Slc18a2	20
CC	GO:0099501	exocytic vesicle membrane	20/2101	147/28573	0.00559984	0.0222444	0.0136448	Calm3/Bcl2l1/Rab10/Rab7/Rab2a/Rab11b/Atp6v1b2/Atp6v1f/Atp6v1h/Dlg1/Apc/Stx16/Atp6v1e1/Atp6v1d/Rab5b/Atp8a1/Snap47/Slc6a9/Slc4a8/Slc18a2	20
CC	GO:0043209	myelin sheath	26/2101	208/28573	0.00560111	0.0222444	0.0136448	Atp1a1/Canx/Msn/Tubb4b/Mdh2/Sdha/Sptan1/Ezr/Calm3/Uqcrfs1/Dlst/Nefh/Pdcd6ip/Scrib/Cox5b/Cox5a/Dlat/Gdi1/Atp6v1b2/Nsf/Dlg1/Pten/Llgl1/Prkci/Pacsin1/Ehd3	26
CC	GO:0033178	proton-transporting two-sector ATPase complex, catalytic domain	5/2101	17/28573	0.00626268	0.0246793	0.0151384	Atp6v1b2/Atp6v1f/Atp6v1h/Atp6v1e1/Atp6v1d	5
CC	GO:0099243	extrinsic component of synaptic membrane	7/2101	31/28573	0.00630524	0.0246793	0.0151384	Ctbp1/Rnf10/Ap2b1/Scrib/Crkl/Stxbp5/Tiam1	7
CC	GO:0071014	post-mRNA release spliceosomal complex	4/2101	11/28573	0.00632075	0.0246793	0.0151384	Isy1/Crnkl1/Tfip11/Gcfc2	4
CC	GO:0005637	nuclear inner membrane	8/2101	39/28573	0.00663683	0.0256027	0.0157048	Tmpo/Lmnb1/Emd/Dpy19l1/Tmem201/Dpy19l3/Tmx4/Tmem120b	8
CC	GO:0005775	vacuolar lumen	6/2101	24/28573	0.00666777	0.0256027	0.0157048	Gaa/Man2b2/Ids/Hgsnat/Idua/Nsg2	6
CC	GO:0005849	mRNA cleavage factor complex	6/2101	24/28573	0.00666777	0.0256027	0.0157048	Sympk/Cpsf1/Nudt21/Wdr33/Fip1l1/Zc3h3	6
CC	GO:0030027	lamellipodium	23/2101	181/28573	0.00724416	0.0276631	0.0169687	Myh9/Actr2/Capzb/Ablim1/Ctnnb1/Cd44/Dgkz/Vasp/Dbnl/Coro1c/Myo9b/Wasf2/Ptk2b/Evl/Hax1/Coro1b/Ppp1r9b/Apc/Limk1/Wasl/Dynlt1a/Cttn/Nradd	23
CC	GO:0098858	actin-based cell projection	28/2101	234/28573	0.00753397	0.0286126	0.0175511	Lcp1/Msn/Ezr/Dync1h1/Ctnnb1/Cd44/Vasp/Myo9b/Tgfb1/Slc6a6/Fmr1/Fxr1/Ap2a1/Ube2k/Atp6v1b2/Ppp1r9b/Myo5a/Dlg1/Atp6v1e1/Slc26a2/Tprn/Kif13b/Whrn/Wwox/Atp7a/Ctsl/Bbs2/Itga3	28
CC	GO:0016323	basolateral plasma membrane	31/2101	267/28573	0.00788871	0.029797	0.0182776	Atp1a1/Msn/Ide/Ezr/Atp1b3/Ctnnb1/Cd44/Slc6a6/Slc19a1/Erbin/Scrib/Ap2a1/Orai1/Slc43a3/Stk39/Dlg1/Llgl1/Slc5a3/Pkd1/Slc23a2/Abcc5/Abcc4/Stxbp3/Slc39a8/Cnnm4/Slc6a9/Slc4a8/Atp7a/Itga3/Slc2a9/Vangl2	31
CC	GO:0032433	filopodium tip	5/2101	18/28573	0.00815375	0.0299834	0.0183919	Myo9b/Fmr1/Ap2a1/Ube2k/Myo5a	5
CC	GO:0033276	transcription factor TFTC complex	5/2101	18/28573	0.00815375	0.0299834	0.0183919	Trrap/Atxn7l3/Kat2a/Taf4/Taf9b	5
CC	GO:0035098	ESC/E(Z) complex	5/2101	18/28573	0.00815375	0.0299834	0.0183919	Aebp2/Suz12/Epop/Jarid2/Phf19	5
CC	GO:0090571	RNA polymerase II transcription repressor complex	5/2101	18/28573	0.00815375	0.0299834	0.0183919	Ctnnb1/Foxo3/Hdac5/Lin52/Ctnnbip1	5
CC	GO:0098833	presynaptic endocytic zone	5/2101	18/28573	0.00815375	0.0299834	0.0183919	Ctbp1/Ap2b1/Pip5k1c/Pacsin1/Fcho2	5
CC	GO:0072379	ER membrane insertion complex	4/2101	12/28573	0.0089348	0.0326089	0.0200025	Bag6/Nomo1/Ncln/Tmco1	4
CC	GO:0005790	smooth endoplasmic reticulum	7/2101	33/28573	0.00900851	0.0326089	0.0200025	Canx/Hsp90b1/Dnajc3/Mapk8ip3/Erp29/Myo5a/Gabarap	7
CC	GO:0070971	endoplasmic reticulum exit site	7/2101	33/28573	0.00900851	0.0326089	0.0200025	Pdcd6ip/Sar1a/Tmed5/Sec31a/Sec16a/Pdcd6/Mia3	7
CC	GO:0005759	mitochondrial matrix	34/2101	304/28573	0.0097518	0.0351166	0.0215406	Shmt2/C1qbp/Mdh2/Atad3a/Hadha/Dhx30/Suclg1/Ppif/Hax1/Tfam/Polg/Dlat/Grsf1/Hadhb/Lactb2/Bckdk/Foxo3/Mrps16/Mars2/Mrpl34/Polrmt/Acadm/Coasy/Mrps34/Grpel2/Pdpr/Dglucy/Glrx2/Cbr4/Primpol/Wars2/Mterf1a/Acss1/Gstk1	34
CC	GO:0005839	proteasome core complex	5/2101	19/28573	0.0104067	0.0370904	0.0227514	Psmb4/Psmb1/Psma6/Psma5/Psmb2	5
CC	GO:0034518	RNA cap binding complex	5/2101	19/28573	0.0104067	0.0370904	0.0227514	Eif4g1/Ago2/Eif4g3/Fmr1/Rnmt	5
CC	GO:0080008	Cul4-RING E3 ubiquitin ligase complex	7/2101	34/28573	0.0106398	0.0377277	0.0231423	Dcaf8/Rbx1/Dcaf15/Ambra1/Fbxw5/Dcaf10/Ercc8	7
CC	GO:0016605	PML body	13/2101	87/28573	0.0108866	0.038407	0.023559	Cbx5/Ube2i/Hipk3/Hipk1/Kat6a/Ski/Trim8/Ikbke/Hsf1/Agap3/Crebbp/Rb1/Nsmce2	13
CC	GO:0031985	Golgi cisterna	11/2101	69/28573	0.0115433	0.0405182	0.024854	Bcap31/Nucb1/Man2a1/Llgl1/Stx16/Chpf/Golga2/Slc30a7/Golph3l/Bet1/Nsg2	11
CC	GO:0005902	microvillus	15/2101	107/28573	0.011629	0.0406138	0.0249127	Msn/Ezr/Ctnnb1/Cd44/Tgfb1/Slc6a6/Atp6v1b2/Dlg1/Atp6v1e1/Slc26a2/Kif13b/Wwox/Atp7a/Ctsl/Bbs2	15
CC	GO:0035267	NuA4 histone acetyltransferase complex	6/2101	27/28573	0.0121398	0.0410398	0.025174	Trrap/Actl6a/Kat5/Epc1/Vps72/Ing3	6
CC	GO:0043189	H4/H2A histone acetyltransferase complex	6/2101	27/28573	0.0121398	0.0410398	0.025174	Trrap/Actl6a/Kat5/Epc1/Vps72/Ing3	6
CC	GO:0000812	Swr1 complex	4/2101	13/28573	0.0121643	0.0410398	0.025174	Trrap/Kat5/Ing3/Znhit1	4
CC	GO:0005916	fascia adherens	4/2101	13/28573	0.0121643	0.0410398	0.025174	Sptan1/Ctnnb1/Actn1/Vcl	4
CC	GO:0038201	TOR complex	4/2101	13/28573	0.0121643	0.0410398	0.025174	Larp1/Tti1/Rptor/Akt1s1	4
CC	GO:0044322	endoplasmic reticulum quality control compartment	4/2101	13/28573	0.0121643	0.0410398	0.025174	Canx/Herpud1/Sec61b/Man1b1	4
CC	GO:0106068	SUMO ligase complex	4/2101	13/28573	0.0121643	0.0410398	0.025174	Rangap1/Ube2i/Nsmce1/Nsmce2	4
CC	GO:0030665	clathrin-coated vesicle membrane	9/2101	52/28573	0.0127562	0.0426227	0.0261449	Ap2b1/Ap1g1/Ap1m1/Ap1b1/Ap2a1/Synrg/Tbc1d5/Dennd1a/Necap1	9
CC	GO:0099091	postsynaptic specialization, intracellular component	9/2101	52/28573	0.0127562	0.0426227	0.0261449	Srgn/Ctnnb1/Ptk2b/Snx1/Dlg1/Nr3c1/Akap1/Bcr/Sh3gl3	9
CC	GO:0043202	lysosomal lumen	5/2101	20/28573	0.0130509	0.0433988	0.026621	Man2b2/Ids/Hgsnat/Idua/Nsg2	5
CC	GO:0000792	heterochromatin	14/2101	99/28573	0.013457	0.0445364	0.0273188	Dnmt1/Trim28/Cbx5/Baz1b/Suz12/Smarca4/Rrp1b/Phc2/Suv39h1/Hsf1/Bend3/Cbx2/Ring1/Hmga1b	14
CC	GO:0035861	site of double-strand break	12/2101	80/28573	0.0136907	0.0448595	0.027517	Actr2/Parp1/Was/Uimc1/Rnf168/Kat5/Epc1/Rnf169/Smarcal1/Shld2/Rnf8/Setmar	12
CC	GO:0034451	centriolar satellite	16/2101	119/28573	0.0137183	0.0448595	0.027517	Rbm39/Nudt21/Naa40/Pcnt/Cd2ap/Spag9/Pacsin2/Pja2/Nek1/Rab11fip3/Mpp1/Ccdc14/Harbi1/Cdc42bpg/Cep131/Ccdc112	16
CC	GO:0030119	AP-type membrane coat adaptor complex	8/2101	44/28573	0.0138129	0.0448595	0.027517	Ap2b1/Ap1g1/Ap1m1/Ap1b1/Ap3b1/Ap2a1/Tbc1d5/Vps18	8
CC	GO:0044232	organelle membrane contact site	8/2101	44/28573	0.0138129	0.0448595	0.027517	Canx/Ahcyl1/Bcap31/Esyt2/Tmx2/Atg2a/Stard3nl/Tmcc1	8
CC	GO:0005689	U12-type spliceosomal complex	6/2101	28/28573	0.0145111	0.0469081	0.0287736	Sf3b2/Sf3b4/Snrpd3/Phf5a/Zcrb1/Pdcd7	6
CC	GO:0005777	peroxisome	19/2101	151/28573	0.0151445	0.0484863	0.0297417	Rab8b/Ide/Idi1/Akap11/Myo5a/Gbf1/Tysnd1/Pex6/Vwa8/Hsd17b4/Tmem135/Dhrs7b/Acbd5/Abcd1/Mpv17/Ehhadh/Acot6/Gstk1/Pex11g	19
CC	GO:0042579	microbody	19/2101	151/28573	0.0151445	0.0484863	0.0297417	Rab8b/Ide/Idi1/Akap11/Myo5a/Gbf1/Tysnd1/Pex6/Vwa8/Hsd17b4/Tmem135/Dhrs7b/Acbd5/Abcd1/Mpv17/Ehhadh/Acot6/Gstk1/Pex11g	19
CC	GO:0045178	basal part of cell	35/2101	325/28573	0.0152086	0.0484863	0.0297417	Atp1a1/Msn/Ide/Ezr/Atp1b3/Ctnnb1/Cd44/Slc6a6/Slc19a1/Erbin/Scrib/Mark2/Clasp1/Ap2a1/Orai1/Slc43a3/Stk39/Dlg1/Llgl1/Slc5a3/Pkd1/Slc23a2/Abcc5/Abcc4/Stxbp3/Slc39a8/Cnnm4/Slc6a9/Phldb1/Slc4a8/Atp7a/Itga3/Slc2a9/Vangl2/Ager	35
CC	GO:0005905	clathrin-coated pit	11/2101	72/28573	0.0156594	0.0496953	0.0304833	Bcl2l1/Ap2b1/Dgkd/Ap1g1/Ap2a1/Tnk2/Tbc1d5/Synj1/Fcho2/Necap1/Cttn	11
MF	GO:0003712	transcription coregulator activity	96/2065	497/28407	7.95986e-19	8.58073e-16	5.94895e-16	Mybbp1a/Chd4/Trim28/Hcfc1/Thrap3/C1qbp/Noc2l/Aebp2/Actn4/Sub1/Mta2/Ctbp1/Ddx17/Dot1l/Smarca4/Ctnnb1/Cbfb/Pprc1/Trrap/Notch1/Brd4/Rrp1b/Mta1/Jund/Trim27/Hipk3/Tbl1x/Hipk1/Ddx54/Tcf20/Med12/Med1/Phf10/Carm1/Actn1/Kat6a/Bcor/Spen/Ncor2/Atxn7l3/Zfpm1/Kdm2b/Uri1/Hdac3/Rbm14/Gmnn/Ski/Kat2a/Med24/Mms19/Phf2/Trim8/Med15/Rad54l2/Snw1/Sra1/Jmjd1c/Pkn1/Rbbp8/Rcor1/Atf7ip/Crebbp/Arl2bp/Ccdc124/Aip/Nr3c1/Eno1…	96
MF	GO:0004842	ubiquitin-protein transferase activity	82/2065	431/28407	7.09244e-16	3.82283e-13	2.65033e-13	Trim28/Huwe1/Ubr4/Ube2i/Mycbp2/Rnf10/Cblb/Rnf187/Cul3/Trim27/Jade2/Taf1/Rlim/Zfp598/Traf7/Med12/Med1/Msl2/Rmnd5a/Wsb1/Rbx1/Bcor/Mdm2/Ube2j1/Rnf44/Herc2/Xiap/Ube2j2/Fbxl14/Nsmce1/Rnf40/Kcmf1/Med24/Znrf2/Ube2k/Ubr7/Trim8/Ube3b/Arel1/Neurl4/Trim33/Mib1/Rnf123/Rnf38/Ubr3/Ube2o/Hltf/Rnf14/Brap/Wwp2/Irf2bp1/Rnf168/Rc3h2/Rchy1/Pja2/Bfar/Ube2a/Irf2bpl/Kctd10/Rnf216/Rnf169/Med20/Rnf41/Herc3/Ercc8/Klhl21/U…	82
MF	GO:0140993	histone modifying activity	50/2065	196/28407	2.55573e-15	9.18357e-13	6.3669e-13	Huwe1/Baz1b/Suz12/Mta2/Dot1l/Nsd2/Jade2/Kmt2a/Taf1/Ehmt2/Naa40/Prmt7/Phf10/Carm1/Kat6a/Vrk1/Kdm2b/Hdac3/Suv39h1/Kat2a/Med24/Phf2/Jmjd6/Setd7/Jmjd1c/Ehmt1/Pkn1/Gtf3c4/Crebbp/Brca2/Jarid2/Kat14/Setd1a/Rnf168/Smyd2/Phf8/Kat5/Naa60/Ube2a/Ing3/Kat8/Haspin/Brpf3/Ncoa1/Hdac6/Hdac5/N6amt1/Hdac8/Smyd1/Setmar	50
MF	GO:0019787	ubiquitin-like protein transferase activity	83/2065	457/28407	7.47614e-15	2.01482e-12	1.39686e-12	Trim28/Huwe1/Ubr4/Ube2i/Mycbp2/Rnf10/Cblb/Rnf187/Cul3/Trim27/Jade2/Taf1/Rlim/Zfp598/Traf7/Med12/Med1/Msl2/Rmnd5a/Wsb1/Rbx1/Bcor/Mdm2/Ube2j1/Rnf44/Herc2/Xiap/Ube2j2/Fbxl14/Nsmce1/Rnf40/Kcmf1/Med24/Znrf2/Ube2k/Ubr7/Trim8/Ube3b/Arel1/Neurl4/Trim33/Mib1/Rnf123/Rnf38/Ubr3/Ube2o/Hltf/Rnf14/Brap/Wwp2/Irf2bp1/Rnf168/Rc3h2/Rchy1/Pja2/Bfar/Ube2a/Irf2bpl/Kctd10/Ube2f/Rnf216/Rnf169/Med20/Rnf41/Herc3/Ercc8/Kl…	83
MF	GO:0003713	transcription coactivator activity	58/2065	265/28407	2.4989e-14	5.38763e-12	3.7352e-12	Trim28/Hcfc1/Thrap3/Actn4/Sub1/Mta2/Ctbp1/Ddx17/Dot1l/Smarca4/Ctnnb1/Cbfb/Pprc1/Trrap/Notch1/Brd4/Rrp1b/Mta1/Jund/Trim27/Tcf20/Med12/Med1/Carm1/Actn1/Kat6a/Atxn7l3/Rbm14/Kat2a/Med24/Mms19/Phf2/Trim8/Snw1/Sra1/Pkn1/Crebbp/Arl2bp/Ccdc124/Nr3c1/Ssbp3/Kat5/Med16/Kat8/Yaf2/Camta2/Med20/Ncoa1/Smarca2/Usp21/Tdrd3/Hmga1b/Xpc/Tada2b/Utf1/Wwox/Ss18l1/Med12l	58
MF	GO:0016755	aminoacyltransferase activity	83/2065	473/28407	5.45536e-14	9.80146e-12	6.79527e-12	Trim28/Huwe1/Ubr4/Ube2i/Mycbp2/Rnf10/Cblb/Rnf187/Cul3/Trim27/Jade2/Taf1/Rlim/Zfp598/Traf7/Med12/Med1/Msl2/Rmnd5a/Wsb1/Rbx1/Bcor/Mdm2/Ube2j1/Rnf44/Herc2/Xiap/Ube2j2/Fbxl14/Nsmce1/Rnf40/Kcmf1/Med24/Znrf2/Ube2k/Ubr7/Trim8/Ube3b/Arel1/Neurl4/Trim33/Mib1/Rnf123/Rnf38/Ubr3/Ube2o/Hltf/Rnf14/Brap/Wwp2/Irf2bp1/Rnf168/Rc3h2/Rchy1/Pja2/Bfar/Ube2a/Irf2bpl/Kctd10/Ube2f/Rnf216/Rnf169/Med20/Rnf41/Herc3/Ercc8/Kl…	83
MF	GO:0061630	ubiquitin protein ligase activity	67/2065	345/28407	1.15883e-13	1.78459e-11	1.23724e-11	Trim28/Huwe1/Ubr4/Mycbp2/Rnf10/Cblb/Cul3/Trim27/Jade2/Rlim/Zfp598/Traf7/Med12/Med1/Msl2/Rmnd5a/Wsb1/Rbx1/Mdm2/Rnf44/Herc2/Xiap/Nsmce1/Rnf40/Kcmf1/Med24/Znrf2/Ube2k/Ubr7/Trim8/Ube3b/Arel1/Neurl4/Trim33/Mib1/Rnf123/Rnf38/Ubr3/Ube2o/Hltf/Rnf14/Brap/Wwp2/Irf2bp1/Rnf168/Rc3h2/Rchy1/Pja2/Bfar/Ube2a/Irf2bpl/Rnf216/Med20/Rnf41/Herc3/Trim41/Ring1/Btrc/Vps18/Cbll1/Rnf113a2/Trim65/Rnf144a/Rnf8/Fbxo17/Lonrf3…	67
MF	GO:0061629	RNA polymerase II-specific DNA-binding transcription factor binding	71/2065	382/28407	2.07051e-13	2.79001e-11	1.93429e-11	Dnmt1/Chd4/Fkbp4/Atf4/Thrap3/Actn4/Dnaja1/Mta2/Parp1/Ctbp1/Nr4a3/Dot1l/Smarca4/Ctnnb1/Arid1a/Psma6/Nfatc1/Mta1/Jund/Taf1/Ddx54/Med12/Med1/Rbx1/Ptpn2/Spen/Ncor2/Mapk14/Zfpm1/Srf/Uba3/Notch2/Hdac3/Ifrd1/Crkl/Med24/Mms19/Med25/Snw1/Sra1/Ubxn7/Pkn1/Rbbp8/Hsf1/Gtf2a1/Smad2/Uimc1/Crebbp/Aip/Ctdp1/Ipo13/Rnf14/Wwp2/Taf4/Rb1/Setd1a/Arnt/Med16/Kat8/Ncoa1/Hdac5/Nr4a2/Fam220a/Commd6/Hmga1b/Xpc/Cry2/Lcor/Rarg…	71
MF	GO:0042393	histone binding	60/2065	294/28407	2.36255e-13	2.82981e-11	1.96188e-11	Chd4/Mcm2/Cbx5/Noc2l/Baz1b/Suz12/Anp32a/Brd2/Atad2/Hjurp/Smarcc1/Smarca4/Brd4/Msh6/Ipo9/Usp15/Phc2/Kmt2a/Dnajc9/Taf1/Tbl1x/Smarcc2/Prmt7/Fmr1/Carm1/Mllt1/Vrk1/Cks1b/Cxxc1/Dpf2/Ttll12/Phf2/Ino80/Brd3/Asf1b/Pkn1/Spin1/Rsf1/Mllt10/Uimc1/Jarid2/Atad2b/Rnf168/Phf8/Phf19/Vps72/Ing3/Znhit1/Hinfp/Rnf169/Pwwp2a/Smarca2/Cbx2/Tdrd3/Scmh1/Scml4/Rnf8/Ctsl/Tspyl4/Cd1d1	60
MF	GO:0003729	mRNA binding	71/2065	386/28407	3.50937e-13	3.7831e-11	2.62279e-11	Pabpc1/Rps3a1/Eif4g1/Srrm2/G3bp1/Ptbp1/Shmt2/Hnrnpa0/Hnrnpl/Ybx3/Pcbp1/Hnrnpm/Larp1/Hnrnpc/Pabpc4/C1qbp/Pcbp2/Tpr/Snrnp70/Khsrp/Rbm25/Eif4enif1/Khdrbs1/Ptbp3/Rnps1/Cluh/Ddx17/Ago2/Celf2/Dazap1/Eif4a3/Slbp/Eif4g3/Cpsf1/Supt5/Zc3h12d/Tsn/Rbm38/Nudt21/Eif2a/Rbm8a/Fmr1/Fxr1/Spen/Pum1/Ireb2/Rbm15/Rbm15b/Rnf40/Paip2/Casc3/Angel2/Dcp1a/Tia1/Secisbp2l/Unk/Rc3h2/Srsf4/Atxn2/Mettl3/Lsm14b/Lsm1/Ptbp2/Fech/Z…	71
MF	GO:0061659	ubiquitin-like protein ligase activity	68/2065	362/28407	3.96656e-13	3.88722e-11	2.69498e-11	Trim28/Huwe1/Ubr4/Mycbp2/Rnf10/Cblb/Cul3/Trim27/Jade2/Rlim/Zfp598/Traf7/Med12/Med1/Msl2/Rmnd5a/Wsb1/Rbx1/Mdm2/Rnf44/Herc2/Xiap/Nsmce1/Rnf40/Kcmf1/Med24/Znrf2/Ube2k/Ubr7/Trim8/Ube3b/Arel1/Neurl4/Trim33/Mib1/Rnf123/Rnf38/Ubr3/Ube2o/Hltf/Rnf14/Brap/Wwp2/Irf2bp1/Rnf168/Rc3h2/Rchy1/Pja2/Bfar/Ube2a/Irf2bpl/Rnf216/Med20/Rnf41/Herc3/Nsmce2/Trim41/Ring1/Btrc/Vps18/Cbll1/Rnf113a2/Trim65/Rnf144a/Rnf8/Fbxo17…	68
MF	GO:0001098	basal transcription machinery binding	24/2065	63/28407	4.0499e-12	3.3583e-10	2.32828e-10	Ago2/Brd4/Taf1/Rtraf/Scaf1/Scaf4/Uri1/Llph/Ctr9/Cdc73/Rprd1b/Ago1/Supt4a/Elof1/Gtf2e2/Gtf2a1/Pcif1/Crebbp/Ctdp1/Smyd2/Leo1/Ercc4/Elp4/Rprd1a	24
MF	GO:0001099	basal RNA polymerase II transcription machinery binding	24/2065	63/28407	4.0499e-12	3.3583e-10	2.32828e-10	Ago2/Brd4/Taf1/Rtraf/Scaf1/Scaf4/Uri1/Llph/Ctr9/Cdc73/Rprd1b/Ago1/Supt4a/Elof1/Gtf2e2/Gtf2a1/Pcif1/Crebbp/Ctdp1/Smyd2/Leo1/Ercc4/Elp4/Rprd1a	24
MF	GO:0004674	protein serine/threonine kinase activity	75/2065	441/28407	4.41007e-12	3.39575e-10	2.35425e-10	Brd2/Wnk1/Mapk1/Pak2/Akt1/Brd4/Uhmk1/Csnk1d/Hipk3/Ptk2b/Taf1/Hipk1/Map2k2/Clk1/Rps6ka1/Stk24/Ikbkb/Irak1/Rps6ka3/Mapk14/Vrk1/Mark2/Cdk13/Stk10/Map2k3/Tlk1/Stk40/Gsk3a/Mast3/Riok1/Mast2/Cdc7/Stk39/Prkd2/Ccnk/Ikbke/Mark3/Bckdk/Map3k11/Pkn1/Tlk2/Lmtk2/Prkaca/Tnk2/Prkd3/Clk4/Prkci/Map3k2/Csnk1e/Nek1/Haspin/Pdik1l/Mknk1/Stk19/Limk1/Snrk/Mastl/Prkag2/Bcr/Tgfbr3/Trp53rka/Prkag1/Cdk10/Mapk11/Plk2/Sbk1/Ir…	75
MF	GO:0051020	GTPase binding	61/2065	337/28407	3.1857e-11	2.22369e-09	1.54167e-09	Lcp1/Rcc2/Arhgdia/Flna/Rangap1/Pak2/Mycbp2/Xpo6/Bcl2l1/Rab7/Coro1c/Fmnl1/Myo9b/Ipo9/Diaph1/Xpo7/Cdc42se1/Aimp1/Ap1g1/Hdac3/Git1/Gdi1/Git2/Unc13d/Bicdl1/Was/Lsm2/Myo5a/Ipo8/Rasa1/Mfn2/Map3k11/Pkn1/Acap2/Nsf/Tbc1d13/Tsc2/Llgl1/Rptor/Prkaca/Gga1/Ambra1/Ipo13/Eno1b/Rin3/Rnf41/Rab11fip3/Dennd1a/Exoc8/Micall1/Sgsm3/Plk2/Rab11fip1/Afdn/Tbc1d30/Vcl/Hps6/Rab11fip2/Atp7a/Cdc42ep3/Rilpl1	61
MF	GO:0140098	catalytic activity, acting on RNA	66/2065	380/28407	3.30047e-11	2.22369e-09	1.54167e-09	G3bp1/Polr2a/Snd1/Ddx17/Ago2/Eif4a3/Exosc10/Farsb/Upf1/Zc3h12d/Dis3/Trnt1/Dhx30/Ddx54/Rnmt/Dhx38/Pnpt1/Polr1c/Angel2/Drosha/Jmjd6/Lrrc47/Dcp1a/Dhx29/Mepce/Polr2f/Lactb2/Xrn1/Tut7/Tarbp1/Nudt3/Pcif1/Fto/Pop4/Slu7/Dcps/Brip1/Mars2/Polrmt/Cars2/Dalrd3/Smg6/Mettl3/Dhx34/Hars2/Sars2/Aars2/Eri3/Polr2j/Dus2/Tsr3/Trit1/Gatb/Zc3h12a/Mettl5/Dis3l/Tsen34/Primpol/Wars2/Fen1/Angel1/Trmt10b/Dtwd2/Nudt16/Fdxacb…	66
MF	GO:0043175	RNA polymerase core enzyme binding	18/2065	41/28407	1.1947e-10	7.57583e-09	5.25226e-09	Ago2/Brd4/Rtraf/Rrn3/Scaf1/Scaf4/Uri1/Ctr9/Cdc73/Rprd1b/Ago1/Supt4a/Elof1/Pcif1/Smyd2/Leo1/Elp4/Rprd1a	18
MF	GO:0016407	acetyltransferase activity	29/2065	103/28407	1.34487e-10	8.05428e-09	5.58396e-09	Fasn/Ogt/Nat10/Jade2/Taf1/Naa40/Phf10/Kat6a/Dlat/Kat2a/Med24/Hadhb/Gtf3c4/Crebbp/Brca2/Kat14/Kat5/Naa60/Ing3/Kat8/Brpf3/Ncoa1/Hgsnat/Nat2/Gcat/Nat9/Pafah2/Nat8f4/Lcat	29
MF	GO:0043021	ribonucleoprotein complex binding	42/2065	195/28407	1.5302e-10	8.68186e-09	6.01906e-09	G3bp1/Ybx3/Larp1/Hnrnpc/Rbm39/Cbx5/C1qbp/Ppp1ca/Snrnp70/Abcf1/Snd1/Ddx17/Bag6/Eif3k/Eif4a3/Bop1/Nomo1/Ifrd2/Uhmk1/Eif2a/Ncln/Snrpd3/Zfp598/Prmt7/Fmr1/Letm1/Mdm2/Prmt3/Sec61b/Dhx29/Tmco1/Derl2/Pym1/Secisbp2l/Unk/Dnajc1/Smg6/Impact/Zc3h12a/Sec61a2/Srp54a/Pelo	42
MF	GO:0000993	RNA polymerase II complex binding	17/2065	37/28407	1.6169e-10	8.71506e-09	6.04208e-09	Ago2/Brd4/Rtraf/Scaf1/Scaf4/Uri1/Ctr9/Cdc73/Rprd1b/Ago1/Supt4a/Elof1/Pcif1/Smyd2/Leo1/Elp4/Rprd1a	17
MF	GO:0016747	acyltransferase activity, transferring groups other than amino-acyl groups	46/2065	233/28407	4.50317e-10	2.31163e-08	1.60263e-08	Fasn/Ogt/Dlst/Nmt1/Hadha/Nat10/Jade2/Taf1/Cers2/Naa40/Zdhhc3/Phf10/Kat6a/Dlat/Kat2a/Med24/Zdhhc6/Hadhb/Gtf3c4/Crebbp/Brca2/Kat14/Zdhhc8/Zdhhc7/Sptlc2/Kat5/Naa60/Elovl6/Ing3/Kat8/Brpf3/Mcat/Ncoa1/Zdhhc16/Hgsnat/Cers6/Gpam/Zdhhc24/Nat2/Gcat/Zdhhc1/Nat9/Pafah2/Nat8f4/Elovl7/Lcat	46
MF	GO:0140030	modification-dependent protein binding	46/2065	236/28407	6.97406e-10	3.41729e-08	2.36918e-08	Cbx5/Suz12/Brd2/Ide/Smarca4/Bag6/Ubqln1/Brd4/Msh6/Ankrd13a/Usp15/Psmd4/Kmt2a/Taf1/Ubqln4/Vav1/Fmr1/Carm1/Mllt1/Ubxn1/Cxxc1/Dpf2/Ttll12/Phf2/Brd3/Ikbke/Spin1/Agap3/Uimc1/Jarid2/Atad2b/Pex6/Rnf168/Ubqln2/Phf8/Phf19/Ing3/Rnf169/Tnip2/Pwwp2a/Hdac6/Cbx2/Abraxas1/Tdrd3/Tab3/Fan1	46
MF	GO:0031625	ubiquitin protein ligase binding	58/2065	338/28407	8.14991e-10	3.81983e-08	2.64825e-08	Fau/Ywhae/Trim28/Prkar1a/Actn4/Pcbp2/Rangap1/Polr2a/Dnaja1/Parp1/Bag6/Psmd1/Ctnnb1/Cul3/Ptk2b/Usp19/Nedd8/Rbx1/Ubxn1/Mdm2/Ube2j1/Herc2/Ube2j2/Aup1/Rnf40/Ski/Casc3/Cdkn1a/Ube2k/Prkar2a/Axin1/Tnfrsf1b/Ikbke/Gabarap/Ubxn7/Mfn2/Crk/Smad2/Apc/Patz1/Hltf/Prkaca/Tnk2/Ambra1/Rb1/Zfp746/Ube2a/Srprb/Hdac6/Ube2t/Ube2w/Tnfrsf14/Fbxo7/Stx8/Ankra2/Vcl/Rnf8/Prkar2b	58
MF	GO:0031267	small GTPase binding	53/2065	297/28407	1.03869e-09	4.66547e-08	3.23453e-08	Rcc2/Arhgdia/Flna/Rangap1/Pak2/Mycbp2/Xpo6/Rab7/Coro1c/Fmnl1/Myo9b/Ipo9/Diaph1/Xpo7/Cdc42se1/Ap1g1/Git1/Gdi1/Git2/Unc13d/Bicdl1/Was/Lsm2/Myo5a/Ipo8/Mfn2/Map3k11/Pkn1/Acap2/Nsf/Tbc1d13/Tsc2/Llgl1/Rptor/Prkaca/Gga1/Ipo13/Rin3/Rnf41/Rab11fip3/Dennd1a/Exoc8/Micall1/Sgsm3/Rab11fip1/Afdn/Tbc1d30/Vcl/Hps6/Rab11fip2/Atp7a/Cdc42ep3/Rilpl1	53
MF	GO:0008080	N-acetyltransferase activity	23/2065	76/28407	2.27705e-09	9.81864e-08	6.80718e-08	Ogt/Nat10/Jade2/Taf1/Naa40/Phf10/Kat6a/Kat2a/Med24/Gtf3c4/Crebbp/Brca2/Kat14/Kat5/Naa60/Ing3/Kat8/Brpf3/Ncoa1/Hgsnat/Nat2/Nat9/Nat8f4	23
MF	GO:0004402	histone acetyltransferase activity	17/2065	43/28407	2.80954e-09	1.16488e-07	8.07599e-08	Jade2/Taf1/Naa40/Phf10/Kat6a/Kat2a/Med24/Gtf3c4/Crebbp/Brca2/Kat14/Kat5/Naa60/Ing3/Kat8/Brpf3/Ncoa1	17
MF	GO:0070063	RNA polymerase binding	20/2065	61/28407	5.32068e-09	2.12433e-07	1.47278e-07	Ago2/Brd4/Rtraf/Rrn3/Phrf1/Scaf1/Scaf4/Uri1/Ctr9/Ccnt2/Cdc73/Rprd1b/Ago1/Supt4a/Elof1/Pcif1/Smyd2/Leo1/Elp4/Rprd1a	20
MF	GO:0030695	GTPase regulator activity	66/2065	429/28407	5.9255e-09	2.20265e-07	1.52708e-07	Rcc2/Arhgdia/Eif5/Arhgef1/Rangap1/Mycbp2/Rapgef1/Tagap/Myo9b/Sbf1/Dock8/Dis3/Eif2b5/Sipa1/Vav1/Nucb1/Git1/Gdi1/Ralgapb/Git2/Madd/Tbcd/Ric8a/Rasa1/Acap2/Agap3/Tbc1d13/Tsc2/Arfgap2/Arl2bp/Llgl1/Tbc1d9b/Stxbp5/Flcn/Tbc1d5/Asap1/Rasa3/Arhgap27/Tiam1/Gipc1/Rin3/Tbc1d2b/Arhgap35/Fbxo8/Vav3/Bcr/Sipa1l3/Dennd1a/Sgsm3/Gpsm1/Smap1/Cyth3/Srgap3/Tbc1d30/Arhgap26/Dnmbp/Rgs12/Tbc1d8b/Arhgef4/Rapgef5/Dennd2c/Si…	66
MF	GO:0060589	nucleoside-triphosphatase regulator activity	66/2065	429/28407	5.9255e-09	2.20265e-07	1.52708e-07	Rcc2/Arhgdia/Eif5/Arhgef1/Rangap1/Mycbp2/Rapgef1/Tagap/Myo9b/Sbf1/Dock8/Dis3/Eif2b5/Sipa1/Vav1/Nucb1/Git1/Gdi1/Ralgapb/Git2/Madd/Tbcd/Ric8a/Rasa1/Acap2/Agap3/Tbc1d13/Tsc2/Arfgap2/Arl2bp/Llgl1/Tbc1d9b/Stxbp5/Flcn/Tbc1d5/Asap1/Rasa3/Arhgap27/Tiam1/Gipc1/Rin3/Tbc1d2b/Arhgap35/Fbxo8/Vav3/Bcr/Sipa1l3/Dennd1a/Sgsm3/Gpsm1/Smap1/Cyth3/Srgap3/Tbc1d30/Arhgap26/Dnmbp/Rgs12/Tbc1d8b/Arhgef4/Rapgef5/Dennd2c/Si…	66
MF	GO:0044389	ubiquitin-like protein ligase binding	58/2065	358/28407	7.34534e-09	2.63943e-07	1.82989e-07	Fau/Ywhae/Trim28/Prkar1a/Actn4/Pcbp2/Rangap1/Polr2a/Dnaja1/Parp1/Bag6/Psmd1/Ctnnb1/Cul3/Ptk2b/Usp19/Nedd8/Rbx1/Ubxn1/Mdm2/Ube2j1/Herc2/Ube2j2/Aup1/Rnf40/Ski/Casc3/Cdkn1a/Ube2k/Prkar2a/Axin1/Tnfrsf1b/Ikbke/Gabarap/Ubxn7/Mfn2/Crk/Smad2/Apc/Patz1/Hltf/Prkaca/Tnk2/Ambra1/Rb1/Zfp746/Ube2a/Srprb/Hdac6/Ube2t/Ube2w/Tnfrsf14/Fbxo7/Stx8/Ankra2/Vcl/Rnf8/Prkar2b	58
MF	GO:0016410	N-acyltransferase activity	26/2065	100/28407	7.6415e-09	2.65727e-07	1.84226e-07	Ogt/Nmt1/Nat10/Jade2/Taf1/Cers2/Naa40/Phf10/Kat6a/Kat2a/Med24/Gtf3c4/Crebbp/Brca2/Kat14/Kat5/Naa60/Ing3/Kat8/Brpf3/Ncoa1/Hgsnat/Cers6/Nat2/Nat9/Nat8f4	26
MF	GO:0061733	peptide-lysine-N-acetyltransferase activity	17/2065	46/28407	9.45709e-09	3.18586e-07	2.20873e-07	Jade2/Taf1/Naa40/Phf10/Kat6a/Kat2a/Med24/Gtf3c4/Crebbp/Brca2/Kat14/Kat5/Naa60/Ing3/Kat8/Brpf3/Ncoa1	17
MF	GO:0140097	catalytic activity, acting on DNA	43/2065	237/28407	2.29727e-08	7.5044e-07	5.20274e-07	G3bp1/Ptbp1/Dnmt1/Chd4/Mcm2/Smarca4/Arid1a/Pole/Upf1/Msh6/Rfc5/Dhx30/Aen/Polg/Ino80/Rad54l2/Rbbp8/Rsf1/Fto/Hltf/Chtf18/Mlh1/Brip1/Rad9a/Vps72/Helq/Rad51d/Smarcal1/Polk/Smarca2/Ercc4/Xrcc3/Hmga1b/Mbd4/Primpol/Fen1/Lig4/Fan1/Rad51c/Nthl1/Setmar/Msh5/Dnase1l2	43
MF	GO:0005096	GTPase activator activity	43/2065	238/28407	2.60934e-08	8.27313e-07	5.73569e-07	Arhgdia/Eif5/Arhgef1/Rangap1/Tagap/Myo9b/Sipa1/Git1/Gdi1/Ralgapb/Git2/Tbcd/Ric8a/Rasa1/Acap2/Agap3/Tbc1d13/Tsc2/Arfgap2/Llgl1/Tbc1d9b/Stxbp5/Flcn/Tbc1d5/Asap1/Rasa3/Arhgap27/Gipc1/Rin3/Tbc1d2b/Arhgap35/Bcr/Sipa1l3/Sgsm3/Smap1/Srgap3/Tbc1d30/Arhgap26/Rgs12/Tbc1d8b/Sipa1l2/Tbc1d16/Arhgap29	43
MF	GO:0004518	nuclease activity	38/2065	201/28407	4.80611e-08	1.48028e-06	1.02627e-06	G3bp1/Ptbp1/Snd1/Ago2/Pole/Exosc10/Zc3h12d/Tsn/Dis3/Aen/Polg/Pnpt1/Rexo1/Plscr1/Angel2/Drosha/Myg1/Lactb2/Xrn1/Rbbp8/Pop4/Polrmt/Rad9a/Smg6/Eri3/Ercc4/Xrcc3/Zc3h12a/Dis3l/Tsen34/Fen1/Angel1/Harbi1/Fan1/Nudt16/Rad51c/Setmar/Dnase1l2	38
MF	GO:0016922	nuclear receptor binding	32/2065	156/28407	7.59009e-08	2.26991e-06	1.57371e-06	Dnmt1/Fkbp4/Thrap3/Actn4/Parp1/Nr4a3/Smarca4/Ctnnb1/Arid1a/Jund/Taf1/Ddx54/Med12/Med1/Ncor2/Uba3/Med24/Mms19/Med25/Snw1/Sra1/Pkn1/Uimc1/Ipo13/Rnf14/Med16/Ncoa1/Nr4a2/Hmga1b/Cry2/Lcor/Rarg	32
MF	GO:0034212	peptide N-acetyltransferase activity	17/2065	52/28407	7.79098e-08	2.26991e-06	1.57371e-06	Jade2/Taf1/Naa40/Phf10/Kat6a/Kat2a/Med24/Gtf3c4/Crebbp/Brca2/Kat14/Kat5/Naa60/Ing3/Kat8/Brpf3/Ncoa1	17
MF	GO:0031072	heat shock protein binding	31/2065	152/28407	1.38207e-07	3.92073e-06	2.71821e-06	Arhgdia/Fkbp4/Fkbp1a/Tpr/Dnaja1/Dnaja2/St13/Ogdh/Bag6/Ahsa1/Dlst/Htt/Dnajc7/Usp19/Dnajc9/Dnajb6/Irak1/Bcor/Tfam/Fkbp5/Hsf1/Tsc2/Nr3c1/Unc45a/Eno1b/Hikeshi/Dnajb12/Limk1/Hdac6/Hdac8/Slc18a2	31
MF	GO:0031369	translation initiation factor binding	14/2065	38/28407	2.01229e-07	5.48265e-06	3.80107e-06	Rps3a1/Eif4g1/Eif3b/Larp1/Eif5/Eif3f/Eif4ebp2/Eif2b5/Fmr1/Rbx1/Eif4ebp1/Polr2g/Polr2d/Angel1	14
MF	GO:0016741	transferase activity, transferring one-carbon groups	38/2065	212/28407	2.03438e-07	5.48265e-06	3.80107e-06	Shmt2/Dnmt1/Cad/Gart/Suz12/Atic/Dot1l/Nsd2/Kmt2a/Ehmt2/Prmt7/Carm1/Rnmt/Suv39h1/Prmt3/Ciapin1/Setd7/Mepce/Ehmt1/Icmt/Tarbp1/Pcif1/Jarid2/Mettl9/Setd1a/Smyd2/Mettl3/Pcmtd1/Mettl5/N6amt1/Prdm11/Trmt10b/As3mt/Fdxacb1/Smyd1/Aldh1l2/Setmar/Cmtr1	38
MF	GO:0003730	mRNA 3'-UTR binding	26/2065	119/28407	3.38004e-07	8.88703e-06	6.1613e-06	Pabpc1/Hnrnpa0/Hnrnpl/Ybx3/Larp1/Hnrnpc/Pabpc4/Khsrp/Rnps1/Ddx17/Ago2/Celf2/Dazap1/Cpsf1/Rbm38/Nudt21/Fmr1/Fxr1/Pum1/Rnf40/Angel2/Tia1/Secisbp2l/Zc3h12a/Pcbp4/Rbm4	26
MF	GO:0003714	transcription corepressor activity	36/2065	200/28407	3.78452e-07	9.71359e-06	6.73435e-06	Mybbp1a/Chd4/Trim28/C1qbp/Noc2l/Mta2/Ctbp1/Smarca4/Mta1/Hipk3/Tbl1x/Hipk1/Ddx54/Med1/Bcor/Spen/Ncor2/Zfpm1/Uri1/Hdac3/Gmnn/Ski/Snw1/Rbbp8/Rcor1/Atf7ip/Crebbp/Eno1b/Irf2bp1/Irf2bpl/Yaf2/Dhrs7b/Hdac5/Scai/Lcor/Smyd1	36
MF	GO:0008757	S-adenosylmethionine-dependent methyltransferase activity	30/2065	155/28407	7.11557e-07	1.78386e-05	1.23673e-05	Dnmt1/Dot1l/Nsd2/Kmt2a/Ehmt2/Prmt7/Carm1/Rnmt/Suv39h1/Prmt3/Setd7/Mepce/Ehmt1/Icmt/Tarbp1/Pcif1/Jarid2/Mettl9/Setd1a/Smyd2/Mettl3/Pcmtd1/Mettl5/N6amt1/Trmt10b/As3mt/Fdxacb1/Smyd1/Setmar/Cmtr1	30
MF	GO:0043022	ribosome binding	25/2065	118/28407	1.03806e-06	2.54324e-05	1.76321e-05	G3bp1/Ybx3/Larp1/C1qbp/Abcf1/Bag6/Eif3k/Nomo1/Ifrd2/Eif2a/Ncln/Zfp598/Fmr1/Letm1/Prmt3/Sec61b/Dhx29/Tmco1/Pym1/Unk/Dnajc1/Impact/Zc3h12a/Sec61a2/Pelo	25
MF	GO:0001221	transcription coregulator binding	29/2065	150/28407	1.10862e-06	2.65575e-05	1.84121e-05	Chd4/Suz12/Ube2i/Ctbp1/Nr4a3/Smarca4/Ctnnb1/Stat6/Nfatc1/Jund/Ehmt2/Med1/Tfam/Hdac3/Wiz/Ccnt2/Med25/Ehmt1/Crebbp/Foxo3/Eno1b/Hdac6/Hdac5/Hmga1b/Creb3/Lcor/Bcl6/Thrb/Gata1	29
MF	GO:0042054	histone methyltransferase activity	16/2065	56/28407	1.4593e-06	3.41983e-05	2.37094e-05	Suz12/Dot1l/Nsd2/Kmt2a/Ehmt2/Prmt7/Carm1/Suv39h1/Setd7/Ehmt1/Jarid2/Setd1a/Smyd2/N6amt1/Smyd1/Setmar	16
MF	GO:0008094	ATP-dependent activity, acting on DNA	24/2065	115/28407	2.24661e-06	5.15286e-05	3.57244e-05	G3bp1/Chd4/Mcm2/Smarca4/Arid1a/Upf1/Msh6/Rfc5/Dhx30/Ino80/Rad54l2/Rsf1/Hltf/Chtf18/Mlh1/Brip1/Vps72/Helq/Rad51d/Smarcal1/Smarca2/Xrcc3/Rad51c/Msh5	24
MF	GO:0140938	histone H3 methyltransferase activity	13/2065	40/28407	2.84459e-06	6.38848e-05	4.42908e-05	Dot1l/Nsd2/Kmt2a/Ehmt2/Carm1/Suv39h1/Setd7/Ehmt1/Jarid2/Setd1a/Smyd2/Smyd1/Setmar	13
MF	GO:0010485	histone H4 acetyltransferase activity	10/2065	24/28407	3.06575e-06	6.71275e-05	4.65389e-05	Jade2/Naa40/Kat6a/Kat2a/Brca2/Kat5/Naa60/Ing3/Kat8/Brpf3	10
MF	GO:0034236	protein kinase A catalytic subunit binding	8/2065	15/28407	3.11352e-06	6.71275e-05	4.65389e-05	Prkar1a/Csk/Ezr/Prkar2a/Akap11/Gsk3a/Pja2/Prkar2b	8
MF	GO:0016887	ATP hydrolysis activity	43/2065	283/28407	3.48388e-06	7.36396e-05	5.10537e-05	Atp1a1/Chd4/Hsp90b1/Atp2a2/Atad2/Ide/Abcf1/Psmc3/Smarca4/Psmc4/Psmc5/Upf1/Myo9b/Atad3a/Rfc5/Abca2/Afg3l1/Atp10a/Ino80/Rad54l2/Kifc1/Clpb/Nsf/Kif1c/Atf7ip/Kif2a/Chtf18/Mlh1/Atad2b/Abcb8/Pex6/Vwa8/Abcc5/Kif1b/Dhx34/Abcc4/Atp8a1/Atp13a2/Kif13b/Abcd1/Dqx1/Atp7a/Pfn2	43
MF	GO:0030291	protein serine/threonine kinase inhibitor activity	12/2065	35/28407	3.6292e-06	7.52361e-05	5.21606e-05	Prkar1a/Wnk1/Akt1/Cdkn1a/Prkar2a/Hexim1/Rptor/Akt1s1/Prkag2/Cdkn2c/Inka2/Prkar2b	12
MF	GO:0016417	S-acyltransferase activity	11/2065	30/28407	4.36097e-06	8.87004e-05	6.14953e-05	Fasn/Dlst/Zdhhc3/Dlat/Zdhhc6/Zdhhc8/Zdhhc7/Mcat/Zdhhc16/Zdhhc24/Zdhhc1	11
MF	GO:0015932	nucleobase-containing compound transmembrane transporter activity	15/2065	54/28407	4.55549e-06	9.09411e-05	6.30487e-05	Sidt2/Slc35c1/Slc35b2/Slc35b1/Abcc5/Slc29a3/Abcc4/Slc28a2/Slc35b3/Slc35d1/Slc33a1/Ank/Abcd1/Slc35e3/Slc25a26	15
MF	GO:0000287	magnesium ion binding	35/2065	214/28407	5.29813e-06	0.000103843	7.19938e-05	Wnk1/Farsb/Msh6/Idi1/Foxk2/Rps6ka1/Prps2/Psph/Rps6ka3/Mark2/Atp10a/Plscr1/Extl3/Pdcd6/Rheb/Abl1/Mast3/Mast2/Prpsap1/Nudt3/Prkaca/Wee1/Xxylt1/Enoph1/Pdxk/Atp8a1/Ppa2/Snrk/Irak4/Sik2/Atp10d/Fen1/Nudt16/Cdc42bpg/Dyrk3	35
MF	GO:0008276	protein methyltransferase activity	20/2065	90/28407	5.64691e-06	0.000108138	7.4971e-05	Suz12/Dot1l/Nsd2/Kmt2a/Ehmt2/Prmt7/Carm1/Suv39h1/Prmt3/Setd7/Ehmt1/Icmt/Jarid2/Mettl9/Setd1a/Smyd2/Pcmtd1/N6amt1/Smyd1/Setmar	20
MF	GO:0032182	ubiquitin-like protein binding	24/2065	121/28407	5.71786e-06	0.000108138	7.4971e-05	Usp5/Pelp1/Ubxn1/Mdm2/Cks1b/Herc2/Aup1/Ddi2/Uspl1/Ubxn2a/Ubxn7/Gga1/Jarid2/Rnf168/Mvb12a/Ubap1/Dcun1d2/Stam2/Hdac6/Fbxo7/Tab3/Cuedc1/Trp53inp2/Uchl4	24
MF	GO:0016874	ligase activity	29/2065	163/28407	6.26792e-06	0.000116497	8.07663e-05	Cad/Paics/Gart/Mthfd1/Pfas/Mthfd1l/Farsb/Acaca/Suclg1/Mdm2/Uba3/Lrrc47/Mars2/Gclm/Uba5/Cars2/Dalrd3/Dph6/Hars2/Sars2/Aars2/Ctps2/Gatb/Ttll5/Wars2/Ttl/Lig4/Acss1/Ttll3	29
MF	GO:0008168	methyltransferase activity	33/2065	199/28407	7.19336e-06	0.000128217	8.88921e-05	Dnmt1/Suz12/Dot1l/Nsd2/Kmt2a/Ehmt2/Prmt7/Carm1/Rnmt/Suv39h1/Prmt3/Ciapin1/Setd7/Mepce/Ehmt1/Icmt/Tarbp1/Pcif1/Jarid2/Mettl9/Setd1a/Smyd2/Mettl3/Pcmtd1/Mettl5/N6amt1/Prdm11/Trmt10b/As3mt/Fdxacb1/Smyd1/Setmar/Cmtr1	33
MF	GO:0070577	lysine-acetylated histone binding	10/2065	26/28407	7.25535e-06	0.000128217	8.88921e-05	Brd2/Smarca4/Brd4/Kmt2a/Taf1/Carm1/Mllt1/Dpf2/Brd3/Atad2b	10
MF	GO:0140033	acetylation-dependent protein binding	10/2065	26/28407	7.25535e-06	0.000128217	8.88921e-05	Brd2/Smarca4/Brd4/Kmt2a/Taf1/Carm1/Mllt1/Dpf2/Brd3/Atad2b	10
MF	GO:0008170	N-methyltransferase activity	20/2065	92/28407	8.03743e-06	0.000139748	9.68858e-05	Dot1l/Nsd2/Kmt2a/Ehmt2/Prmt7/Carm1/Rnmt/Suv39h1/Prmt3/Setd7/Ehmt1/Jarid2/Mettl9/Setd1a/Smyd2/Mettl5/N6amt1/Fdxacb1/Smyd1/Setmar	20
MF	GO:0045182	translation regulator activity	26/2065	144/28407	1.41253e-05	0.0002417	0.000167569	Eif4g1/Shmt2/Eif3b/Pcbp1/Larp1/Eif5/Eif4h/Eif3i/Eif3f/Abcf1/Eif4ebp2/Eif3k/Eif4g3/Eif3g/Ifrd2/Eif2a/Eif2b5/Fmr1/Fxr1/Ireb2/Eif4ebp1/Paip2/Patl1/Dhx29/Pura/Ctif	26
MF	GO:0004527	exonuclease activity	17/2065	74/28407	1.75493e-05	0.000295596	0.000204934	Pole/Exosc10/Dis3/Aen/Polg/Pnpt1/Rexo1/Angel2/Xrn1/Polrmt/Rad9a/Eri3/Zc3h12a/Dis3l/Fen1/Angel1/Fan1	17
MF	GO:0019783	ubiquitin-like protein peptidase activity	22/2065	114/28407	2.16688e-05	0.000357468	0.000247829	Eif3f/Usp24/Usp15/Usp36/Usp19/Uchl5/Usp5/Usp10/Uspl1/Usp37/Desi1/Usp31/Usp12/Ufsp2/Zup1/Usp21/Usp28/Zc3h12a/Usp20/Otud3/Ufsp1/Uchl4	22
MF	GO:0051015	actin filament binding	34/2065	219/28407	2.22416e-05	0.000357468	0.000247829	Lcp1/Myh9/Tpm3/Actr2/Flna/Tln1/Actn4/Capzb/Limd2/Ablim1/Sptan1/Ezr/Cotl1/Dbnl/Coro1c/Fmnl1/Myo9b/Arpc4/Actn1/Coro1b/Lasp1/Flnb/Mprip/Ppp1r9b/Abl1/Map1s/Myo5a/Tpm3-rs7/Tmem201/Frg1/Myo18a/Afdn/Vcl/Cttn	34
MF	GO:0019207	kinase regulator activity	39/2065	266/28407	2.24153e-05	0.000357468	0.000247829	Prkar1a/Ccng1/Wnk1/Mob1a/Calm3/Pak2/Akt1/Tgfb1/Ccnl1/Map2k2/Dnajc3/Cks1b/Vac14/Cdkn1a/Prkar2a/Rheb/Akap11/Hexim1/Ccnt2/Ccnk/Apc/Rptor/Rhoh/Akt1s1/Dele1/Dus2/Mob2/Prkag2/Prkag1/Elp4/Cdkn2c/Parp6/Dgkq/Inka2/Sla2/Mtcp1/Prkar2b/Spry2/Camk2n2	39
MF	GO:0031593	polyubiquitin modification-dependent protein binding	15/2065	61/28407	2.28806e-05	0.000357468	0.000247829	Bag6/Ubqln1/Psmd4/Ubqln4/Ubxn1/Ikbke/Agap3/Uimc1/Rnf168/Ubqln2/Rnf169/Tnip2/Hdac6/Abraxas1/Tab3	15
MF	GO:0140296	general transcription initiation factor binding	15/2065	61/28407	2.28806e-05	0.000357468	0.000247829	Atf4/Cand1/Psmc5/Taf1/Med1/Gtf2e2/Hsf1/Gtf2a1/Crebbp/Rptor/Ctdp1/Nr3c1/Brf1/Ercc4/Utf1	15
MF	GO:0008140	cAMP response element binding protein binding	6/2065	10/28407	2.38257e-05	0.000361747	0.000250796	Atf4/Icmt/Crebbp/Crtc3/Crtc1/Creb3	6
MF	GO:0008190	eukaryotic initiation factor 4E binding	6/2065	10/28407	2.38257e-05	0.000361747	0.000250796	Eif4g1/Larp1/Eif4ebp2/Rbx1/Eif4ebp1/Angel1	6
MF	GO:0043130	ubiquitin binding	20/2065	99/28407	2.52751e-05	0.000375632	0.000260422	Usp5/Ubxn1/Mdm2/Cks1b/Aup1/Ddi2/Ubxn2a/Ubxn7/Gga1/Jarid2/Rnf168/Mvb12a/Ubap1/Stam2/Hdac6/Fbxo7/Tab3/Cuedc1/Trp53inp2/Uchl4	20
MF	GO:0002039	p53 binding	17/2065	76/28407	2.5437e-05	0.000375632	0.000260422	Noc2l/Smarca4/Brd4/Htt/Taf1/Ehmt2/Usp10/Mdm2/Axin1/Setd7/Ehmt1/Crebbp/Smyd2/Rchy1/Taf3/Trp53rka/Gata1	17
MF	GO:0019887	protein kinase regulator activity	35/2065	230/28407	2.62032e-05	0.000378616	0.000262491	Prkar1a/Ccng1/Wnk1/Mob1a/Calm3/Pak2/Akt1/Tgfb1/Ccnl1/Map2k2/Dnajc3/Cks1b/Cdkn1a/Prkar2a/Rheb/Hexim1/Ccnt2/Ccnk/Apc/Rptor/Akt1s1/Dele1/Dus2/Mob2/Prkag2/Prkag1/Elp4/Cdkn2c/Parp6/Dgkq/Inka2/Mtcp1/Prkar2b/Spry2/Camk2n2	35
MF	GO:0016879	ligase activity, forming carbon-nitrogen bonds	13/2065	48/28407	2.63415e-05	0.000378616	0.000262491	Cad/Paics/Gart/Mthfd1/Pfas/Mthfd1l/Gclm/Dph6/Ctps2/Gatb/Ttll5/Ttl/Ttll3	13
MF	GO:0003779	actin binding	57/2065	448/28407	2.72816e-05	0.000386968	0.000268282	Lcp1/Myh9/Tpm3/Msn/Actr2/Flna/Tln1/Actn4/Capzb/Limd2/Ablim1/Sptan1/Ezr/Cotl1/Vasp/Dbnl/Coro1c/Fmnl1/Myo9b/Wasf2/Diaph1/Arpc4/Evl/Actn1/Coro1b/Lasp1/Ssh2/Emd/Flnb/Mprip/Ppp1r9b/Ino80/Abl1/Was/Map1s/Myo5a/Tpm3-rs7/Tmem201/Enc1/Tlnrd1/Frg1/Gipc1/Myo18a/Pdlim5/Hdac6/Fhl3/Impact/Gmfg/Spire1/Wasl/Vps18/Cobll1/Afdn/Vcl/Arc/Cttn/Pfn2	57
MF	GO:0003697	single-stranded DNA binding	23/2065	124/28407	2.7708e-05	0.000387912	0.000268936	Ptbp1/Ybx3/Pcbp1/Mcm2/Pcbp2/Sub1/Tsn/Cdc45/Spen/Ctc1/Polr2g/Hsf1/Brca2/Mlh1/Ssbp3/Pura/Rad51d/Smarcal1/Ercc4/Xpc/Rad52/Cry2/Setmar	23
MF	GO:0140036	ubiquitin-dependent protein binding	8/2065	19/28407	2.80796e-05	0.000388075	0.000269049	Ide/Ankrd13a/Usp15/Uimc1/Jarid2/Pex6/Rnf169/Fan1	8
MF	GO:0019905	syntaxin binding	17/2065	77/28407	3.04528e-05	0.000415545	0.000288094	Sptan1/Txlna/Ptpn2/Rnf40/Abl1/Myo5a/Nsf/Sec22b/Stx16/Golga2/Stxbp5/Stxbp3/Snap47/Tpcn1/Stx8/Bet1/Vps18	17
MF	GO:1901505	carbohydrate derivative transmembrane transporter activity	14/2065	56/28407	3.48817e-05	0.000470031	0.000325869	Slc35c1/Slc35b2/Slc35b1/Abcc5/Slc29a3/Slc28a2/Slc35b3/Mfsd2a/Slc35d1/Slc33a1/Ank/Abcd1/Slc35e3/Slc25a26	14
MF	GO:0004519	endonuclease activity	22/2065	119/28407	4.322e-05	0.0005752	0.000398781	G3bp1/Ptbp1/Snd1/Ago2/Zc3h12d/Tsn/Dis3/Drosha/Lactb2/Rbbp8/Pop4/Smg6/Ercc4/Xrcc3/Zc3h12a/Tsen34/Fen1/Fan1/Nudt16/Rad51c/Setmar/Dnase1l2	22
MF	GO:0008234	cysteine-type peptidase activity	28/2065	173/28407	5.3684e-05	0.000705748	0.00048929	Eif3f/Usp24/Usp15/Usp36/Usp19/Uchl5/Usp5/Usp10/Ctsc/Gpaa1/Uspl1/Usp37/Capn1/Desi1/Usp31/Usp12/Ufsp2/Capn15/Ctsw/Zup1/Usp21/Usp28/Zc3h12a/Usp20/Ctsl/Otud3/Ufsp1/Uchl4	28
MF	GO:0015631	tubulin binding	50/2065	387/28407	5.57329e-05	0.000723857	0.000501844	Rcc2/Tpr/Ezr/Numa1/Htt/Fmr1/Clasp1/Git1/Clip1/Nin/Dctn1/Emd/Gtse1/Ttll12/Ino80/Tbcd/Mast2/Map1s/Gabarap/Kifc1/Kif1c/Apc/Dip2b/Reep3/Kif2a/Gnas/Brca2/Bcl2l11/Tubgcp6/Akap1/Hdgfl3/Golga2/Kif1b/Psrc1/Camsap1/Agtpbp1/Tiam1/Rad51d/Eml2/Hdac6/Abraxas1/Cep44/Ttll5/Alms1/Kif13b/Ccdc69/Lrrc61/Rmdn2/Map10/Fes	50
MF	GO:0019210	kinase inhibitor activity	16/2065	73/28407	5.67761e-05	0.000728626	0.00050515	Prkar1a/Wnk1/Akt1/Dnajc3/Cdkn1a/Prkar2a/Hexim1/Rptor/Rhoh/Akt1s1/Dus2/Prkag2/Cdkn2c/Inka2/Prkar2b/Camk2n2	16
MF	GO:0008187	poly-pyrimidine tract binding	10/2065	32/28407	5.88578e-05	0.000746456	0.000517511	Pabpc1/Hnrnpc/Pabpc4/U2af2/Khdrbs1/Dazap1/Fmr1/Pnpt1/Mcrs1/Patl1	10
MF	GO:0140035	ubiquitination-like modification-dependent protein binding	8/2065	21/28407	6.62699e-05	0.000830685	0.000575907	Ide/Ankrd13a/Usp15/Uimc1/Jarid2/Pex6/Rnf169/Fan1	8
MF	GO:0004860	protein kinase inhibitor activity	15/2065	68/28407	8.87922e-05	0.00110021	0.000762764	Prkar1a/Wnk1/Akt1/Dnajc3/Cdkn1a/Prkar2a/Hexim1/Rptor/Akt1s1/Dus2/Prkag2/Cdkn2c/Inka2/Prkar2b/Camk2n2	15
MF	GO:0005522	profilin binding	6/2065	12/28407	9.22849e-05	0.00113049	0.000783759	Vasp/Htt/Fmnl1/Diaph1/Evl/Cttn	6
MF	GO:0042826	histone deacetylase binding	24/2065	143/28407	9.96493e-05	0.00120699	0.000836795	Dnmt1/Chd4/Ywhae/Sfpq/Cbx5/Mta2/Parp1/Mta1/Nudt21/Bcor/Ncor2/Srf/Hdac3/Gmnn/Kat2a/Pkn1/Rad9a/Sp2/Znhit1/Camta2/Hdac6/Hdac5/Ankra2/Lcor	24
MF	GO:0004532	RNA exonuclease activity	10/2065	34/28407	0.000104618	0.00123932	0.000859207	Exosc10/Dis3/Pnpt1/Angel2/Xrn1/Polrmt/Eri3/Zc3h12a/Dis3l/Angel1	10
MF	GO:0140658	ATP-dependent chromatin remodeler activity	10/2065	34/28407	0.000104618	0.00123932	0.000859207	Chd4/Smarca4/Arid1a/Ino80/Rad54l2/Rsf1/Hltf/Vps72/Smarcal1/Smarca2	10
MF	GO:0140612	DNA damage sensor activity	7/2065	17/28407	0.00010769	0.00125186	0.000867906	Msh6/Mlh1/Rad51d/Xrcc3/Xpc/Rad51c/Msh5	7
MF	GO:0008266	poly(U) RNA binding	9/2065	28/28407	0.000107999	0.00125186	0.000867906	Pabpc1/Hnrnpc/Pabpc4/Khdrbs1/Dazap1/Fmr1/Pnpt1/Mcrs1/Patl1	9
MF	GO:0003727	single-stranded RNA binding	19/2065	101/28407	0.000109991	0.00126138	0.000874507	Pabpc1/Hnrnpc/Pabpc4/U2af2/Khdrbs1/Ago2/Dazap1/Eif4a3/Exosc10/Fmr1/Fxr1/Pnpt1/Paip2/Mcrs1/Polr2g/Jmjd6/Ago1/Patl1/Lactb2	19
MF	GO:0004843	cysteine-type deubiquitinase activity	18/2065	93/28407	0.000113023	0.00127795	0.000885994	Eif3f/Usp24/Usp15/Usp36/Usp19/Uchl5/Usp5/Usp10/Usp37/Usp31/Usp12/Zup1/Usp21/Usp28/Zc3h12a/Usp20/Otud3/Uchl4	18
MF	GO:0046332	SMAD binding	17/2065	85/28407	0.000113807	0.00127795	0.000885994	Flna/Fkbp1a/Parp1/Ctnnb1/Usp15/Yy1/Ski/Drosha/Axin1/Snw1/Trim33/Smad2/Crebbp/Pura/Tgfbrap1/Tgfbr3/Zc3h3	17
MF	GO:0004712	protein serine/threonine/tyrosine kinase activity	11/2065	41/28407	0.000119756	0.00133089	0.000922697	Mapk1/Akt1/Map2k2/Clk1/Rps6ka1/Map2k3/Prkaca/Tnk2/Clk4/Tesk1/Dyrk3	11
MF	GO:0140223	general transcription initiation factor activity	12/2065	48/28407	0.000124963	0.00137459	0.000952994	Taf1/Rrn3/Gtf3c1/Gtf2e2/Gtf2a1/Gtf3c4/Gtf3c5/Taf4/Tbpl1/Brf1/Gtf3a/Taf9b	12
MF	GO:0016278	lysine N-methyltransferase activity	13/2065	56/28407	0.000149355	0.00161005	0.00111623	Dot1l/Nsd2/Kmt2a/Ehmt2/Suv39h1/Setd7/Ehmt1/Jarid2/Setd1a/Smyd2/N6amt1/Smyd1/Setmar	13
MF	GO:0016279	protein-lysine N-methyltransferase activity	13/2065	56/28407	0.000149355	0.00161005	0.00111623	Dot1l/Nsd2/Kmt2a/Ehmt2/Suv39h1/Setd7/Ehmt1/Jarid2/Setd1a/Smyd2/N6amt1/Smyd1/Setmar	13
MF	GO:0016791	phosphatase activity	36/2065	263/28407	0.000187606	0.00200237	0.00138823	Atp1a1/Ppp1ca/Ppm1g/Ptp4a3/Ptpa/Cdc25a/Ppp1r12a/Psph/Ptpn2/Dusp5/Ppp2r5d/Ssh2/Minpp1/Sgpp1/Pten/Mtmr2/Ctdp1/Pank4/Ptpn4/Synj1/Dusp7/Enoph1/Ppa2/Acp6/Nt5dc3/Inpp4a/Fra10ac1/Cpped1/Inpp5e/Pip4p2/Ppp1r3e/Pxylp1/Ppm1l/Dusp14/Cdkn3/Ptpdc1	36
MF	GO:0030674	protein-macromolecule adaptor activity	54/2065	452/28407	0.000226852	0.00237938	0.0016496	Myh9/G3bp1/Hcfc1/Cbx5/Tcof1/Wnk1/Khdrbs1/Lat/Atp1b3/Nefh/Brd4/Gatad2a/Cul3/Zc3h18/Arpc4/Scrib/Zfp598/Map2k2/Fmr1/Fxr1/Ap1g1/Ap1m1/Mapk8ip3/Ice1/Crkl/Ap2a1/Pdcd6/Axin1/Dgcr8/Fem1a/Herpud1/Klhdc3/Ncstn/Crk/Spag9/Sec22b/Rptor/Ambra1/Sh2b3/Stx16/Ubqln2/Bfar/Epc1/Snap47/Pcmtd1/Fbxo7/Btrc/Stx8/Bet1/Vps18/Klhl25/Bet1l/Cntln/Sla2	54
MF	GO:0035198	miRNA binding	10/2065	37/28407	0.000227343	0.00237938	0.0016496	Ago2/Fmr1/Pum1/Pnpt1/Zc3h7b/Ago1/Tut7/Zc3h10/Zc3h12a/Rbm4	10
MF	GO:0140664	ATP-dependent DNA damage sensor activity	6/2065	14/28407	0.000264126	0.00273777	0.00189807	Msh6/Mlh1/Rad51d/Xrcc3/Rad51c/Msh5	6
MF	GO:0005112	Notch binding	8/2065	25/28407	0.000270878	0.00275478	0.00190986	Notch1/Cul3/Ncor2/Snw1/Kctd10/Galnt11/Chac1/Egfl7	8
MF	GO:0015216	purine nucleotide transmembrane transporter activity	8/2065	25/28407	0.000270878	0.00275478	0.00190986	Slc35b2/Slc35b1/Abcc5/Abcc4/Slc35b3/Slc33a1/Ank/Abcd1	8
MF	GO:0016667	oxidoreductase activity, acting on a sulfur group of donors	12/2065	52/28407	0.00028224	0.00284351	0.00197138	Txnrd1/Tmx1/Txndc17/Tmx2/Nxn/Coil/Txnrd2/Tmx4/Qsox1/Glrx2/Suox/Srxn1	12
MF	GO:0036002	pre-mRNA binding	10/2065	38/28407	0.000288589	0.00285364	0.0019784	Ptbp1/Hnrnpl/U2af2/Celf2/Slbp/Rbm22/Prpf39/Slu7/Lsm1/Rbm4	10
MF	GO:0008017	microtubule binding	36/2065	269/28407	0.000292544	0.00285364	0.0019784	Rcc2/Ezr/Numa1/Fmr1/Clasp1/Clip1/Nin/Dctn1/Gtse1/Mast2/Map1s/Gabarap/Kifc1/Kif1c/Apc/Reep3/Kif2a/Bcl2l11/Tubgcp6/Akap1/Hdgfl3/Golga2/Kif1b/Psrc1/Camsap1/Tiam1/Eml2/Hdac6/Abraxas1/Cep44/Alms1/Kif13b/Ccdc69/Rmdn2/Map10/Fes	36
MF	GO:0101005	deubiquitinase activity	18/2065	100/28407	0.000292778	0.00285364	0.0019784	Eif3f/Usp24/Usp15/Usp36/Usp19/Uchl5/Usp5/Usp10/Usp37/Usp31/Usp12/Zup1/Usp21/Usp28/Zc3h12a/Usp20/Otud3/Uchl4	18
MF	GO:0004715	non-membrane spanning protein tyrosine kinase activity	11/2065	45/28407	0.000293835	0.00285364	0.0019784	Baz1b/Csk/Ptk2b/Abl1/Peak1/Tyk2/Tnk2/Wee1/Txk/Matk/Fes	11
MF	GO:0090079	translation regulator activity, nucleic acid binding	19/2065	109/28407	0.000308992	0.00297405	0.00206188	Eif4g1/Shmt2/Eif3b/Pcbp1/Larp1/Eif5/Eif4h/Eif3i/Eif3f/Abcf1/Eif3k/Eif4g3/Eif3g/Eif2a/Eif2b5/Paip2/Dhx29/Pura/Ctif	19
MF	GO:0051087	protein-folding chaperone binding	25/2065	164/28407	0.000341052	0.00325358	0.00225568	Atp1a1/Fkbp1a/Dnaja1/Dnaja2/St13/Ogdh/Bag6/Ahsa1/Dlst/Dnajc9/Dnajb6/Dnajc3/Cdc25a/Ctsc/Erp29/Nr3c1/Pfdn6/Dnajc1/Hikeshi/Dnajb12/Grpel2/Dnajb5/Ahsa2/Hdac8/Atp7a	25
MF	GO:0106222	lncRNA binding	7/2065	20/28407	0.000353542	0.00334314	0.00231777	Atp2a2/Suz12/Rad21/Ddx17/Smarca4/Celf2/Hadhb	7
MF	GO:0008494	translation activator activity	5/2065	10/28407	0.000373295	0.00349924	0.00242599	Pcbp1/Larp1/Abcf1/Dhx29/Ctif	5
MF	GO:0035091	phosphatidylinositol binding	38/2065	294/28407	0.000406588	0.00377847	0.00261958	Tln1/Ogt/Akt1/Numa1/Pitpnm2/Snx1/Esyt2/Snx27/Gpaa1/Pitpnb/Wipi2/Gbf1/Acap2/Gga1/Asap1/Atg2a/Pik3c2a/Pitpnc1/Osbpl2/Atp13a2/Golph3l/Stam2/Tecpr1/Phlda3/Zfyve19/Dennd1a/Exoc8/Tpcn1/Fcho2/Cyth3/Dapp1/Gsdme/Wdr45/Snx16/Phlda1/Fes/Grb7/Pfn2	38
MF	GO:0016896	RNA exonuclease activity, producing 5'-phosphomonoesters	9/2065	33/28407	0.000432943	0.003989	0.00276554	Exosc10/Dis3/Pnpt1/Angel2/Xrn1/Polrmt/Eri3/Dis3l/Angel1	9
MF	GO:0051536	iron-sulfur cluster binding	14/2065	70/28407	0.000444924	0.00403049	0.0027943	Pole/Uqcrfs1/Ireb2/Nubp2/Ciapin1/Cisd2/Nubp1/Brip1/Isca2/Fech/Cmah/Glrx2/Nthl1/Rfesd	14
MF	GO:0051540	metal cluster binding	14/2065	70/28407	0.000444924	0.00403049	0.0027943	Pole/Uqcrfs1/Ireb2/Nubp2/Ciapin1/Cisd2/Nubp1/Brip1/Isca2/Fech/Cmah/Glrx2/Nthl1/Rfesd	14
MF	GO:0004540	RNA nuclease activity	20/2065	122/28407	0.000499912	0.00449087	0.00311348	Snd1/Ago2/Exosc10/Zc3h12d/Dis3/Pnpt1/Angel2/Drosha/Lactb2/Xrn1/Pop4/Polrmt/Smg6/Eri3/Zc3h12a/Dis3l/Tsen34/Fen1/Angel1/Nudt16	20
MF	GO:0004386	helicase activity	23/2065	150/28407	0.000530538	0.00472381	0.00327498	G3bp1/Chd4/Mcm2/Ddx17/Smarca4/Eif4a3/Upf1/Rfc5/Dhx30/Ddx54/Dhx38/Dhx37/Rad54l2/Dhx29/Hltf/Helz/Chtf18/Brip1/Helq/Dhx34/Smarcal1/Smarca2/Dqx1	23
MF	GO:0008408	3'-5' exonuclease activity	11/2065	48/28407	0.000534606	0.00472381	0.00327498	Pole/Exosc10/Dis3/Polg/Pnpt1/Angel2/Polrmt/Rad9a/Eri3/Dis3l/Angel1	11
MF	GO:0015605	organophosphate ester transmembrane transporter activity	9/2065	34/28407	0.00055114	0.0047347	0.00328252	Slc35b2/Slc35b1/Abcc5/Abcc4/Slc35b3/Mfsd2a/Slc33a1/Ank/Abcd1	9
MF	GO:0030371	translation repressor activity	9/2065	34/28407	0.00055114	0.0047347	0.00328252	Shmt2/Eif4ebp2/Ifrd2/Fmr1/Ireb2/Eif4ebp1/Paip2/Patl1/Pura	9
MF	GO:0042974	nuclear retinoic acid receptor binding	9/2065	34/28407	0.00055114	0.0047347	0.00328252	Actn4/Med1/Ncor2/Med25/Snw1/Uimc1/Ncoa1/Hmga1b/Rarg	9
MF	GO:0004713	protein tyrosine kinase activity	21/2065	132/28407	0.000553406	0.0047347	0.00328252	Baz1b/Csk/Hipk3/Ptk2b/Hipk1/Map2k2/Clk1/Map2k3/Abl1/Peak1/Tyk2/Tnk2/Clk4/Wee1/Nek1/Tesk1/Txk/Dyrk3/Matk/Fgfrl1/Fes	21
MF	GO:0070717	poly-purine tract binding	10/2065	41/28407	0.000560219	0.00475525	0.00329677	Pabpc1/Pabpc4/Khdrbs1/Dazap1/Eif4a3/Fmr1/Pnpt1/Paip2/Mcrs1/Patl1	10
MF	GO:0005160	transforming growth factor beta receptor binding	8/2065	28/28407	0.000639706	0.00517596	0.00358845	Fkbp1a/Cd44/Tgfb1/Usp15/Smad2/Tgfbrap1/Tgfbr3/Rasl11b	8
MF	GO:0015215	nucleotide transmembrane transporter activity	8/2065	28/28407	0.000639706	0.00517596	0.00358845	Slc35b2/Slc35b1/Abcc5/Abcc4/Slc35b3/Slc33a1/Ank/Abcd1	8
MF	GO:0051537	2 iron, 2 sulfur cluster binding	8/2065	28/28407	0.000639706	0.00517596	0.00358845	Uqcrfs1/Ciapin1/Cisd2/Isca2/Fech/Cmah/Glrx2/Rfesd	8
MF	GO:0000995	RNA polymerase III general transcription initiation factor activity	5/2065	11/28407	0.000643394	0.00517596	0.00358845	Gtf3c1/Gtf3c4/Gtf3c5/Brf1/Gtf3a	5
MF	GO:0034046	poly(G) binding	5/2065	11/28407	0.000643394	0.00517596	0.00358845	Dazap1/Fmr1/Pnpt1/Mcrs1/Patl1	5
MF	GO:0043995	histone H4K5 acetyltransferase activity	5/2065	11/28407	0.000643394	0.00517596	0.00358845	Jade2/Kat6a/Ing3/Kat8/Brpf3	5
MF	GO:0043996	histone H4K8 acetyltransferase activity	5/2065	11/28407	0.000643394	0.00517596	0.00358845	Jade2/Kat6a/Ing3/Kat8/Brpf3	5
MF	GO:0001227	DNA-binding transcription repressor activity, RNA polymerase II-specific	42/2065	343/28407	0.000649381	0.00518543	0.00359501	Nfatc1/Yy1/Foxk2/Foxp4/Cc2d1b/Ski/Foxk1/Ylpm1/Zfp384/Hsf1/Hivep1/Patz1/Foxo3/Klf16/Nr3c1/Eno1b/Mafk/E2f8/Zfp746/Sp2/Zfp263/Hinfp/Zbtb45/Thap11/Hdac5/Cc2d1a/Gtf2ird1/Zfp668/Zfp120/E2f7/Zbtb34/Zbtb39/Bach1/Zfp952/Zfp157/Gm45871/Bcl6/Gm4924/Zfp949/Gm10033/Ikzf5/Zfp3	42
MF	GO:0019003	GDP binding	15/2065	81/28407	0.000667454	0.00529055	0.0036679	Rap1b/Rab8b/Rab10/Rab7/Suclg1/Rab8a/Prps2/Rab2a/Rab11b/Rheb/Rab22a/Rab5b/Rab9/Rhebl1/Srp54a	15
MF	GO:0031490	chromatin DNA binding	19/2065	116/28407	0.000689997	0.00542932	0.0037641	Hcfc1/Actn4/Suz12/Ogt/Ddx17/Notch1/Med1/Srf/Hdac3/Jmjd1c/Hsf1/Crebbp/Foxo3/Zfx/H1f0/Repin1/Bcl6/Thrb/Gata1	19
MF	GO:0016758	hexosyltransferase activity	27/2065	193/28407	0.000803755	0.00627861	0.0043529	Ogt/B4galnt1/Galnt1/Galnt6/Pigq/Alg10b/Extl3/Lfng/Dpy19l1/Chpf/Ext2/Alg5/Galnt7/B3galnt2/Galnt10/Pomgnt1/Gba2/Mgat5/Pofut2/Dpy19l3/Galnt11/B4gat1/B3glct/Pigyl/Fut7/B4galt4/Pomgnt2	27
MF	GO:0000400	four-way junction DNA binding	6/2065	17/28407	0.000900229	0.00698163	0.00484031	Msh6/Yy1/Abl1/Rad51d/Xrcc3/Rad51c	6
MF	GO:0001217	DNA-binding transcription repressor activity	42/2065	349/28407	0.000919801	0.00708247	0.00491022	Nfatc1/Yy1/Foxk2/Foxp4/Cc2d1b/Ski/Foxk1/Ylpm1/Zfp384/Hsf1/Hivep1/Patz1/Foxo3/Klf16/Nr3c1/Eno1b/Mafk/E2f8/Zfp746/Sp2/Zfp263/Hinfp/Zbtb45/Thap11/Hdac5/Cc2d1a/Gtf2ird1/Zfp668/Zfp120/E2f7/Zbtb34/Zbtb39/Bach1/Zfp952/Zfp157/Gm45871/Bcl6/Gm4924/Zfp949/Gm10033/Ikzf5/Zfp3	42
MF	GO:0061650	ubiquitin-like protein conjugating enzyme activity	10/2065	44/28407	0.00101542	0.00776328	0.00538222	Ube2i/Taf1/Ube2j1/Ube2j2/Ube2k/Ube2o/Ube2a/Ube2f/Ube2t/Ube2w	10
MF	GO:0043997	histone H4K12 acetyltransferase activity	5/2065	12/28407	0.00103704	0.00787276	0.00545812	Jade2/Kat6a/Kat2a/Ing3/Brpf3	5
MF	GO:0000175	3'-5'-RNA exonuclease activity	8/2065	30/28407	0.00105728	0.00791491	0.00548734	Exosc10/Dis3/Pnpt1/Angel2/Polrmt/Eri3/Dis3l/Angel1	8
MF	GO:0035925	mRNA 3'-UTR AU-rich region binding	8/2065	30/28407	0.00105728	0.00791491	0.00548734	Hnrnpa0/Khsrp/Ago2/Cpsf1/Nudt21/Fxr1/Tia1/Zc3h12a	8
MF	GO:0016757	glycosyltransferase activity	34/2065	268/28407	0.00110216	0.00819398	0.00568082	Parp1/Ogt/B4galnt1/Aprt/St6galnac4/Galnt1/Galnt6/Pigq/Alg10b/Extl3/Lfng/Dpy19l1/Chpf/Ext2/Alg5/Galnt7/B3galnt2/Xxylt1/Galnt10/Pomgnt1/Gba2/Mgat5/Pofut2/Dpy19l3/St8sia1/Galnt11/Parp6/B4gat1/B3glct/St3gal5/Pigyl/Fut7/B4galt4/Pomgnt2	34
MF	GO:0017124	SH3 domain binding	20/2065	130/28407	0.00113698	0.00839494	0.00582014	Khdrbs1/Vasp/Pdcd6ip/Cblb/Wasf2/Evl/Plscr1/Cd2ap/Abl1/Was/Zfp384/Crk/Mvb12a/Rad9a/Synj1/Arhgap27/Dennd1a/Rufy1/Adam15/Grik5	20
MF	GO:0008194	UDP-glycosyltransferase activity	22/2065	149/28407	0.00115677	0.00848298	0.00588118	Ogt/B4galnt1/Galnt1/Galnt6/Pigq/Extl3/Lfng/Chpf/Ext2/Alg5/Galnt7/B3galnt2/Xxylt1/Galnt10/Pomgnt1/Mgat5/Galnt11/B4gat1/B3glct/Pigyl/B4galt4/Pomgnt2	22
MF	GO:0051219	phosphoprotein binding	18/2065	112/28407	0.00118091	0.00860146	0.00596332	Ywhae/Fkbp4/Thrap3/Mapk1/Cd44/Cblb/Vav1/Igf2r/Scaf4/Uri1/Crkl/Abl1/Rasa1/Crk/Pcif1/Rb1/Leo1/Btrc	18
MF	GO:0044325	transmembrane transporter binding	24/2065	169/28407	0.00123516	0.00893628	0.00619545	Ywhae/Flna/Atp2a2/Actn4/Fkbp1a/Calm3/Ctnnb1/Kcnab2/Htt/Cherp/Diaph1/Usp10/Nptn/Fmr1/Actn1/Ppp1r9b/Herpud1/Rasa1/Dlg1/Slc5a3/Pkd1/Pacs2/Pkd1l3/Dynlt1a	24
MF	GO:0016796	exonuclease activity, active with either ribo- or deoxyribonucleic acids and producing 5'-phosphomonoesters	11/2065	53/28407	0.00128983	0.00914056	0.00633707	Pole/Exosc10/Dis3/Pnpt1/Angel2/Xrn1/Polrmt/Rad9a/Eri3/Dis3l/Angel1	11
MF	GO:0030374	nuclear receptor coactivator activity	11/2065	53/28407	0.00128983	0.00914056	0.00633707	Actn4/Pprc1/Med1/Carm1/Actn1/Atxn7l3/Rbm14/Sra1/Pkn1/Ncoa1/Hmga1b	11
MF	GO:0003743	translation initiation factor activity	12/2065	61/28407	0.00129732	0.00914056	0.00633707	Eif4g1/Eif3b/Eif5/Eif4h/Eif3i/Eif3f/Eif3k/Eif4g3/Eif3g/Eif2a/Eif2b5/Dhx29	12
MF	GO:0004536	DNA nuclease activity	12/2065	61/28407	0.00129732	0.00914056	0.00633707	Ptbp1/Pole/Aen/Rbbp8/Rad9a/Ercc4/Xrcc3/Fen1/Fan1/Rad51c/Setmar/Dnase1l2	12
MF	GO:0000217	DNA secondary structure binding	9/2065	38/28407	0.00131571	0.00921	0.00638521	Msh6/Yy1/Clspn/Abl1/Rad51d/Xrcc3/H1f0/Hmga1b/Rad51c	9
MF	GO:1990841	promoter-specific chromatin binding	14/2065	79/28407	0.00155146	0.0107656	0.00746369	Dnmt1/Trim28/Atf4/Suz12/Polr2a/Taf1/Ehmt2/Med1/Rbl1/Trim33/Hsf1/Rbl2/Ercc4/Mybl1	14
MF	GO:0022804	active transmembrane transporter activity	49/2065	435/28407	0.00155791	0.0107656	0.00746369	Atp1a1/Atp2a2/Ghitm/Atp1b3/Slc38a2/Uqcrfs1/Slc6a6/Slc19a1/Slc20a1/Slc35e1/Abca2/Letm1/Cox5a/Atp6v1b2/Atp6v1f/Atp6v1h/Ipo8/Slc35c1/Atp6v1e1/Slc5a3/Slc35b2/Abcb8/Slc35b1/Slc23a2/Atp6v1d/Abcc5/Slc29a3/Abcc4/Slc25a15/Slc20a2/Atp13a2/Slc28a2/Slc35b3/Slc26a2/Mfsd2a/Slc35d1/Slc39a8/Ank/Cyb561d1/Abcd1/Slc6a9/Slc35e3/Slc4a8/Slc25a26/Atp7a/Slc2a8/Slc7a11/Slc18a2/Slc16a4	49
MF	GO:0001727	lipid kinase activity	9/2065	39/28407	0.00160152	0.0109964	0.00762373	Dgkz/Dgkd/Pi4ka/Pip4k2b/Pip5k1c/Ipmk/Pik3c2a/Dgke/Dgkq	9
MF	GO:0005543	phospholipid binding	54/2065	492/28407	0.00166655	0.0113705	0.00788307	Tln1/Ogt/Akt1/Numa1/Pitpnm2/Snx1/Gltp/Esyt2/Snx27/Bin2/Anxa7/Gpaa1/Pitpnb/Wipi2/Gabarap/Gbf1/Bdh1/Acap2/Pacsin2/Gga1/Asap1/Atg2a/Prkci/Tiam1/Pik3c2a/Pitpnc1/Osbpl2/Atp13a2/Arhgap35/Golph3l/Stam2/Tecpr1/Phlda3/Zfyve19/Pcyt1a/Dennd1a/Exoc8/Tpcn1/Micall1/Pacsin1/Fcho2/Anxa11/Cyth3/Dapp1/Gsdme/Arhgap26/Wdr45/Cpne2/Snx16/Ticam2/Phlda1/Fes/Grb7/Pfn2	54
MF	GO:0008375	acetylglucosaminyltransferase activity	10/2065	47/28407	0.00173627	0.0117215	0.00812641	Ogt/Pigq/Extl3/Lfng/Ext2/Pomgnt1/Mgat5/B3glct/Pigyl/Pomgnt2	10
MF	GO:0042800	histone H3K4 methyltransferase activity	6/2065	19/28407	0.00173974	0.0117215	0.00812641	Kmt2a/Setd7/Setd1a/Smyd2/Smyd1/Setmar	6
MF	GO:1901682	sulfur compound transmembrane transporter activity	11/2065	55/28407	0.00177128	0.0118599	0.00822235	Slc6a6/Slc35b2/Slc19a2/Abcc4/Slc35b3/Slc26a2/Slc33a1/Abcd1/Slc25a26/Atp7a/Slc7a11	11
MF	GO:0004520	DNA endonuclease activity	9/2065	40/28407	0.00193502	0.0128763	0.008927	Ptbp1/Rbbp8/Ercc4/Xrcc3/Fen1/Fan1/Rad51c/Setmar/Dnase1l2	9
MF	GO:0030145	manganese ion binding	12/2065	64/28407	0.0019988	0.0131384	0.00910876	Idi1/Galnt1/Abl1/Nudt3/Prkaca/Xxylt1/Pomgnt1/Adprm/Mgat5/Primpol/Fen1/Nudt16	12
MF	GO:0045309	protein phosphorylated amino acid binding	12/2065	64/28407	0.0019988	0.0131384	0.00910876	Ywhae/Mapk1/Cblb/Vav1/Scaf4/Crkl/Abl1/Rasa1/Crk/Pcif1/Leo1/Btrc	12
MF	GO:0001671	ATPase activator activity	7/2065	26/28407	0.0020396	0.0131614	0.0091247	Dnaja1/Dnaja2/Atp1b3/Ahsa1/Dnajb6/Rab6a/Ahsa2	7
MF	GO:0019706	protein-cysteine S-palmitoyltransferase activity	7/2065	26/28407	0.0020396	0.0131614	0.0091247	Zdhhc3/Zdhhc6/Zdhhc8/Zdhhc7/Zdhhc16/Zdhhc24/Zdhhc1	7
MF	GO:0019707	protein-cysteine S-acyltransferase activity	7/2065	26/28407	0.0020396	0.0131614	0.0091247	Zdhhc3/Zdhhc6/Zdhhc8/Zdhhc7/Zdhhc16/Zdhhc24/Zdhhc1	7
MF	GO:0051018	protein kinase A binding	11/2065	56/28407	0.00206184	0.0131614	0.0091247	Prkar1a/Csk/Ezr/Wasf2/Prkar2a/Akap11/Gsk3a/Prkaca/Akap1/Pja2/Prkar2b	11
MF	GO:0008376	acetylgalactosaminyltransferase activity	8/2065	33/28407	0.00206334	0.0131614	0.0091247	B4galnt1/Galnt1/Galnt6/Chpf/Galnt7/B3galnt2/Galnt10/Galnt11	8
MF	GO:0016779	nucleotidyltransferase activity	20/2065	137/28407	0.0021711	0.01374	0.00952582	Papola/Polr2a/Parp1/Pole/Trnt1/Polg/Pnpt1/Polr1c/Polr2g/Rpap1/Polr2f/Tut7/Polrmt/Tamm41/Coasy/Polk/Polr2j/Pcyt1a/Primpol/Parp6	20
MF	GO:0019001	guanyl nucleotide binding	44/2065	387/28407	0.00219228	0.01374	0.00952582	Eif5/Rap1b/Fkbp4/Tubb4b/Rab8b/Eftud2/Rab10/Rab7/Sar1a/Slc19a1/Rabl6/Suclg1/Rab8a/Prps2/Rhog/Rab2a/Rab11b/Gnl1/Nin/Pip4k2b/Rheb/Mfn2/Agap3/Noa1/Gnas/Rab6a/Rhoh/Rab22a/Rab5b/Srprb/Arhgap35/Urgcp/Rab9/Ehd3/Rhebl1/Arf2/Cracr2a/Rab23/Srp54a/Arl5c/Rab19/Rab3d/Rab43/Rasl11b	44
MF	GO:0032561	guanyl ribonucleotide binding	44/2065	387/28407	0.00219228	0.01374	0.00952582	Eif5/Rap1b/Fkbp4/Tubb4b/Rab8b/Eftud2/Rab10/Rab7/Sar1a/Slc19a1/Rabl6/Suclg1/Rab8a/Prps2/Rhog/Rab2a/Rab11b/Gnl1/Nin/Pip4k2b/Rheb/Mfn2/Agap3/Noa1/Gnas/Rab6a/Rhoh/Rab22a/Rab5b/Srprb/Arhgap35/Urgcp/Rab9/Ehd3/Rhebl1/Arf2/Cracr2a/Rab23/Srp54a/Arl5c/Rab19/Rab3d/Rab43/Rasl11b	44
MF	GO:0046982	protein heterodimerization activity	37/2065	312/28407	0.00230957	0.013982	0.0096936	Atp1a1/Ywhae/Atf4/Phb2/Tcof1/Bcl2l1/Supt5/Dgkd/Taf1/Fmr1/Fxr1/Ikbkb/Irak1/Snx1/Uba3/Ralgapb/Supt4a/Hsf1/Gtf2a1/Nfyc/Psmf1/Atf6/Ext2/Zfp397/Zhx1/Arnt/Mettl3/Tfe3/Taf3/Zfp318/Micu1/Nr4a2/Fbxo7/Abcd1/Taf9b/Itga3/Ticam2	37
MF	GO:0004559	alpha-mannosidase activity	5/2065	14/28407	0.00231832	0.013982	0.0096936	Man1a2/Man2a1/Man2c1/Man1b1/Man2b2	5
MF	GO:0008097	5S rRNA binding	5/2065	14/28407	0.00231832	0.013982	0.0096936	Rpl3/Rrs1/Mdm2/Gtf3a/Tst	5
MF	GO:0010484	histone H3 acetyltransferase activity	5/2065	14/28407	0.00231832	0.013982	0.0096936	Jade2/Kat6a/Kat2a/Brca2/Brpf3	5
MF	GO:0106310	protein serine kinase activity	5/2065	14/28407	0.00231832	0.013982	0.0096936	Akt1/Csnk1d/Prkd2/Prkaca/Sik2	5
MF	GO:0004812	aminoacyl-tRNA ligase activity	9/2065	41/28407	0.00232169	0.013982	0.0096936	Farsb/Lrrc47/Mars2/Cars2/Dalrd3/Hars2/Sars2/Aars2/Wars2	9
MF	GO:0016875	ligase activity, forming carbon-oxygen bonds	9/2065	41/28407	0.00232169	0.013982	0.0096936	Farsb/Lrrc47/Mars2/Cars2/Dalrd3/Hars2/Sars2/Aars2/Wars2	9
MF	GO:0015036	disulfide oxidoreductase activity	8/2065	34/28407	0.00252863	0.01506	0.010441	Tmx1/Txndc17/Tmx2/Nxn/Coil/Tmx4/Qsox1/Glrx2	8
MF	GO:0019213	deacetylase activity	8/2065	34/28407	0.00252863	0.01506	0.010441	Mta2/Hdac3/Ydjc/Ndst1/Hdac6/Hdac5/Pigl/Hdac8	8
MF	GO:0001222	transcription corepressor binding	12/2065	66/28407	0.00261955	0.0155158	0.010757	Suz12/Ctbp1/Ctnnb1/Ehmt2/Hdac3/Wiz/Ehmt1/Eno1b/Hdac6/Hdac5/Lcor/Bcl6	12
MF	GO:0140101	catalytic activity, acting on a tRNA	19/2065	130/28407	0.0027258	0.0160569	0.0111321	Farsb/Trnt1/Lrrc47/Tarbp1/Fto/Pop4/Mars2/Cars2/Dalrd3/Hars2/Sars2/Aars2/Dus2/Trit1/Gatb/Tsen34/Wars2/Trmt10b/Dtwd2	19
MF	GO:0043531	ADP binding	9/2065	42/28407	0.00276727	0.0162126	0.01124	Myh9/Atp1a1/Myo9b/Msh6/Prps2/Myo18a/Prkag2/Prkag1/Abcd1	9
MF	GO:0035255	ionotropic glutamate receptor binding	10/2065	50/28407	0.00282368	0.0164536	0.0114072	Canx/Ube2i/Ctnnb1/Snx27/Nsf/Dlg1/Pten/Gnas/Eml2/Neto2	10
MF	GO:0005085	guanyl-nucleotide exchange factor activity	26/2065	201/28407	0.00305014	0.0176777	0.0122558	Rcc2/Arhgef1/Mycbp2/Rapgef1/Tagap/Sbf1/Dock8/Dis3/Eif2b5/Vav1/Nucb1/Madd/Ric8a/Tiam1/Rin3/Fbxo8/Vav3/Bcr/Dennd1a/Cyth3/Dnmbp/Arhgef4/Rapgef5/Dennd2c/Arfgef3/Farp2	26
MF	GO:0005346	purine ribonucleotide transmembrane transporter activity	6/2065	21/28407	0.00306848	0.0176801	0.0122575	Slc35b2/Slc35b1/Slc35b3/Slc33a1/Ank/Abcd1	6
MF	GO:0042578	phosphoric ester hydrolase activity	40/2065	350/28407	0.00308336	0.0176801	0.0122575	Atp1a1/Ppp1ca/Ppm1g/Ptp4a3/Ptpa/Cdc25a/Ppp1r12a/Psph/Pde7a/Ptpn2/Dusp5/Ppp2r5d/Ssh2/Minpp1/Sgpp1/Pten/Mtmr2/Ctdp1/Gnas/Pank4/Ptpn4/Synj1/Dusp7/Enoph1/Ppa2/Adprm/Acp6/Nt5dc3/Inpp4a/Fra10ac1/Cpped1/Inpp5e/Pip4p2/Ppp1r3e/Pxylp1/Fan1/Ppm1l/Dusp14/Cdkn3/Ptpdc1	40
MF	GO:0019902	phosphatase binding	30/2065	243/28407	0.00315009	0.0179672	0.0124565	Ywhae/Hsp90b1/Ppp1ca/Wnk1/Mapk1/Csk/Ctnnb1/Akt1/Stat6/Ptpa/Fmr1/Ikbkb/Mapk14/Ctsc/Git1/Eif4ebp1/Ap3b1/Kat2a/Ppp1r9b/Akap11/Mast2/Tsc2/Smad2/Dlg1/Ambra1/Akap1/Mtmr9/Tprn/Cry2/Ppp1r3e	30
MF	GO:0016836	hydro-lyase activity	11/2065	59/28407	0.00317269	0.0180008	0.0124798	Fasn/Hadha/Ireb2/Eno1b/Hsd17b4/Alad/Dglucy/Tgds/Hacd2/Apip/Ehhadh	11
MF	GO:0000339	RNA cap binding	5/2065	15/28407	0.0032709	0.0182685	0.0126654	Larp1/Ago2/Fmr1/Dcps/Lsm1	5
MF	GO:0015923	mannosidase activity	5/2065	15/28407	0.0032709	0.0182685	0.0126654	Man1a2/Man2a1/Man2c1/Man1b1/Man2b2	5
MF	GO:0001046	core promoter sequence-specific DNA binding	10/2065	51/28407	0.00328764	0.0182685	0.0126654	Polr2a/Ago2/Smarca4/Taf1/Rrn3/Ago1/Gtf2a1/Nr3c1/Taf4/Tbpl1	10
MF	GO:0061980	regulatory RNA binding	10/2065	51/28407	0.00328764	0.0182685	0.0126654	Ago2/Fmr1/Pum1/Pnpt1/Zc3h7b/Ago1/Tut7/Zc3h10/Zc3h12a/Rbm4	10
MF	GO:0005525	GTP binding	41/2065	363/28407	0.00340794	0.0188398	0.0130615	Eif5/Rap1b/Fkbp4/Tubb4b/Rab8b/Eftud2/Rab10/Rab7/Sar1a/Rabl6/Rab8a/Rhog/Rab2a/Rab11b/Gnl1/Nin/Pip4k2b/Rheb/Mfn2/Agap3/Noa1/Gnas/Rab6a/Rhoh/Rab22a/Rab5b/Srprb/Arhgap35/Urgcp/Rab9/Ehd3/Rhebl1/Arf2/Cracr2a/Rab23/Srp54a/Arl5c/Rab19/Rab3d/Rab43/Rasl11b	41
MF	GO:0016835	carbon-oxygen lyase activity	13/2065	77/28407	0.00349625	0.0192294	0.0133316	Fasn/Hadha/Ireb2/Eno1b/Hsd17b4/Alad/Dglucy/Tgds/Hacd2/Hmga1b/Apip/Nthl1/Ehhadh	13
MF	GO:0097718	disordered domain specific binding	8/2065	36/28407	0.00370213	0.0202584	0.014045	Ezr/Ctnnb1/Numa1/Mdm2/Myo5a/Smad2/Crebbp/Rb1	8
MF	GO:0017069	snRNA binding	9/2065	44/28407	0.00385954	0.0210131	0.0145682	Eftud2/Snrnp70/Snrpd3/Rbm22/Hexim1/Ccnt2/Mepce/Coil/Lsm11	9
MF	GO:0120014	phospholipid transfer activity	6/2065	22/28407	0.00396278	0.0214667	0.0148827	Pitpnm2/Gltp/Pitpnb/Pitpnc1/Osbpl2/Prelid2	6
MF	GO:0017025	TBP-class protein binding	7/2065	29/28407	0.00399494	0.0215326	0.0149283	Cand1/Psmc5/Taf1/Gtf2a1/Nr3c1/Brf1/Utf1	7
MF	GO:0004300	enoyl-CoA hydratase activity	4/2065	10/28407	0.00409478	0.0215326	0.0149283	Hadha/Hsd17b4/Hacd2/Ehhadh	4
MF	GO:0008353	RNA polymerase II CTD heptapeptide repeat kinase activity	4/2065	10/28407	0.00409478	0.0215326	0.0149283	Mapk1/Brd4/Cdk13/Ccnk	4
MF	GO:0008526	phosphatidylinositol transfer activity	4/2065	10/28407	0.00409478	0.0215326	0.0149283	Pitpnm2/Pitpnb/Pitpnc1/Osbpl2	4
MF	GO:0008603	cAMP-dependent protein kinase regulator activity	4/2065	10/28407	0.00409478	0.0215326	0.0149283	Prkar1a/Prkar2a/Prkag2/Prkar2b	4
MF	GO:0016742	hydroxymethyl-, formyl- and related transferase activity	4/2065	10/28407	0.00409478	0.0215326	0.0149283	Shmt2/Gart/Atic/Aldh1l2	4
MF	GO:0030295	protein kinase activator activity	19/2065	135/28407	0.00417539	0.0218499	0.0151483	Wnk1/Mob1a/Calm3/Pak2/Tgfb1/Map2k2/Cks1b/Cdkn1a/Rheb/Ccnt2/Ccnk/Rptor/Dele1/Mob2/Prkag2/Parp6/Dgkq/Mtcp1/Spry2	19
MF	GO:0019209	kinase activator activity	20/2065	145/28407	0.00422916	0.0220243	0.0152693	Wnk1/Mob1a/Calm3/Pak2/Tgfb1/Map2k2/Cks1b/Vac14/Cdkn1a/Rheb/Ccnt2/Ccnk/Rptor/Dele1/Mob2/Prkag2/Parp6/Dgkq/Mtcp1/Spry2	20
MF	GO:0016409	palmitoyltransferase activity	8/2065	37/28407	0.00442756	0.0229467	0.0159087	Zdhhc3/Zdhhc6/Zdhhc8/Zdhhc7/Sptlc2/Zdhhc16/Zdhhc24/Zdhhc1	8
MF	GO:0070742	C2H2 zinc finger domain binding	5/2065	16/28407	0.00447562	0.0230848	0.0160045	Srrm2/U2af2/Ehmt2/Ehmt1/Gata1	5
MF	GO:0080025	phosphatidylinositol-3,5-bisphosphate binding	7/2065	30/28407	0.00488901	0.0250969	0.0173995	Wipi2/Gbf1/Acap2/Atp13a2/Phlda3/Tpcn1/Wdr45	7
MF	GO:0042626	ATPase-coupled transmembrane transporter activity	16/2065	108/28407	0.00495471	0.025251	0.0175063	Atp1a1/Atp2a2/Atp1b3/Abca2/Atp6v1b2/Atp6v1f/Atp6v1h/Ipo8/Atp6v1e1/Abcb8/Atp6v1d/Abcc5/Abcc4/Atp13a2/Abcd1/Atp7a	16
MF	GO:0000295	adenine nucleotide transmembrane transporter activity	6/2065	23/28407	0.00503615	0.025251	0.0175063	Slc35b2/Slc35b1/Slc35b3/Slc33a1/Ank/Abcd1	6
MF	GO:0003899	DNA-directed 5'-3' RNA polymerase activity	6/2065	23/28407	0.00503615	0.025251	0.0175063	Polr2a/Polr1c/Polr2f/Polrmt/Polr2j/Primpol	6
MF	GO:0034593	phosphatidylinositol bisphosphate phosphatase activity	6/2065	23/28407	0.00503615	0.025251	0.0175063	Pten/Mtmr2/Synj1/Inpp4a/Inpp5e/Pip4p2	6
MF	GO:0046965	nuclear retinoid X receptor binding	6/2065	23/28407	0.00503615	0.025251	0.0175063	Ncor2/Med25/Uimc1/Ncoa1/Hmga1b/Rarg	6
MF	GO:0042910	xenobiotic transmembrane transporter activity	8/2065	38/28407	0.00525739	0.0261173	0.0181069	Slc6a6/Slc19a1/Slc43a3/Abcc5/Abcc4/Slc37a3/Atraid/Slc18a2	8
MF	GO:0061631	ubiquitin conjugating enzyme activity	8/2065	38/28407	0.00525739	0.0261173	0.0181069	Taf1/Ube2j1/Ube2j2/Ube2k/Ube2o/Ube2a/Ube2t/Ube2w	8
MF	GO:0000149	SNARE binding	17/2065	119/28407	0.00559681	0.027676	0.0191875	Sptan1/Txlna/Ptpn2/Rnf40/Abl1/Myo5a/Nsf/Sec22b/Stx16/Golga2/Stxbp5/Stxbp3/Snap47/Tpcn1/Stx8/Bet1/Vps18	17
MF	GO:0001223	transcription coactivator binding	10/2065	55/28407	0.00578006	0.0284516	0.0197253	Nr4a3/Stat6/Nfatc1/Med1/Tfam/Ccnt2/Med25/Crebbp/Thrb/Gata1	10
MF	GO:0140142	nucleocytoplasmic carrier activity	7/2065	31/28407	0.00592554	0.0288116	0.0199748	Eif4enif1/Xpo6/Kpna4/Ipo9/Xpo7/Nup214/Hikeshi	7
MF	GO:0140994	RNA polymerase II CTD heptapeptide repeat modifying activity	5/2065	17/28407	0.00596536	0.0288116	0.0199748	Mapk1/Brd4/Cdk13/Ccnk/Ctdp1	5
MF	GO:0004143	ATP-dependent diacylglycerol kinase activity	4/2065	11/28407	0.006067	0.0288116	0.0199748	Dgkz/Dgkd/Dgke/Dgkq	4
MF	GO:0005049	nuclear export signal receptor activity	4/2065	11/28407	0.006067	0.0288116	0.0199748	Eif4enif1/Xpo6/Xpo7/Nup214	4
MF	GO:0016653	oxidoreductase activity, acting on NAD(P)H, heme protein as acceptor	4/2065	11/28407	0.006067	0.0288116	0.0199748	Mtrr/Por/Cyb5r1/Ndor1	4
MF	GO:0016668	oxidoreductase activity, acting on a sulfur group of donors, NAD(P) as acceptor	4/2065	11/28407	0.006067	0.0288116	0.0199748	Txnrd1/Txndc17/Nxn/Txnrd2	4
MF	GO:0019107	myristoyltransferase activity	4/2065	11/28407	0.006067	0.0288116	0.0199748	Nmt1/Zdhhc3/Hadhb/Zdhhc7	4
MF	GO:0043008	ATP-dependent protein binding	4/2065	11/28407	0.006067	0.0288116	0.0199748	Myo9b/Myo5a/Nsf/Plk2	4
MF	GO:0017056	structural constituent of nuclear pore	6/2065	24/28407	0.00630819	0.0293113	0.0203213	Tpr/Nup188/Nup93/Pom121/Nup214/Nup133	6
MF	GO:0030742	GTP-dependent protein binding	6/2065	24/28407	0.00630819	0.0293113	0.0203213	Ap1g1/Ap3b1/Rab5b/Hps6/Rapgef5/Rab3d	6
MF	GO:0034062	5'-3' RNA polymerase activity	6/2065	24/28407	0.00630819	0.0293113	0.0203213	Polr2a/Polr1c/Polr2f/Polrmt/Polr2j/Primpol	6
MF	GO:0070840	dynein complex binding	6/2065	24/28407	0.00630819	0.0293113	0.0203213	Tpr/Numa1/Fmr1/Atmin/Apc/Hdac6	6
MF	GO:0097747	RNA polymerase activity	6/2065	24/28407	0.00630819	0.0293113	0.0203213	Polr2a/Polr1c/Polr2f/Polrmt/Polr2j/Primpol	6
MF	GO:0003684	damaged DNA binding	11/2065	65/28407	0.00681053	0.031375	0.021752	Parp1/Msh6/Rbbp8/Crebbp/Polk/Ercc4/Aunip/Xpc/Cry2/Xpa/Nthl1	11
MF	GO:0004521	RNA endonuclease activity	11/2065	65/28407	0.00681053	0.031375	0.021752	Snd1/Ago2/Zc3h12d/Drosha/Lactb2/Pop4/Smg6/Zc3h12a/Tsen34/Fen1/Nudt16	11
MF	GO:0016853	isomerase activity	22/2065	172/28407	0.00692947	0.0317871	0.0220377	Fkbp4/Fkbp1a/Isyna1/Ptpa/Idi1/Ppif/Fkbp5/Mri1/Aip/Hsd17b4/Gne/Acadm/Pmm1/Pgm2l1/Thap4/Fkbp2/Glce/Qsox1/Rpusd1/Creld1/Ehhadh/Rpusd3	22
MF	GO:0004721	phosphoprotein phosphatase activity	21/2065	162/28407	0.00706237	0.0322595	0.0223652	Ppp1ca/Ppm1g/Ptp4a3/Ptpa/Cdc25a/Ppp1r12a/Ptpn2/Dusp5/Ppp2r5d/Ssh2/Pten/Ctdp1/Ptpn4/Dusp7/Ppa2/Cpped1/Ppp1r3e/Ppm1l/Dusp14/Cdkn3/Ptpdc1	21
MF	GO:0015399	primary active transmembrane transporter activity	19/2065	142/28407	0.00722369	0.0328571	0.0227796	Atp1a1/Atp2a2/Atp1b3/Uqcrfs1/Abca2/Cox5a/Atp6v1b2/Atp6v1f/Atp6v1h/Ipo8/Atp6v1e1/Abcb8/Atp6v1d/Abcc5/Abcc4/Atp13a2/Cyb561d1/Abcd1/Atp7a	19
MF	GO:0051539	4 iron, 4 sulfur cluster binding	8/2065	40/28407	0.00726729	0.0329166	0.0228208	Pole/Ireb2/Nubp2/Ciapin1/Nubp1/Brip1/Isca2/Nthl1	8
MF	GO:0019829	ATPase-coupled monoatomic cation transmembrane transporter activity	10/2065	57/28407	0.00748165	0.0337457	0.0233956	Atp1a1/Atp2a2/Atp1b3/Atp6v1b2/Atp6v1f/Atp6v1h/Atp6v1e1/Atp6v1d/Atp13a2/Atp7a	10
MF	GO:0004653	polypeptide N-acetylgalactosaminyltransferase activity	5/2065	18/28407	0.00777213	0.0347384	0.0240838	Galnt1/Galnt6/Galnt7/Galnt10/Galnt11	5
MF	GO:0051787	misfolded protein binding	5/2065	18/28407	0.00777213	0.0347384	0.0240838	Bag6/Dnajc3/Derl2/Hdac6/Sdf2	5
MF	GO:0034237	protein kinase A regulatory subunit binding	6/2065	25/28407	0.00779842	0.0347384	0.0240838	Ezr/Wasf2/Akap11/Prkaca/Akap1/Pja2	6
MF	GO:0035254	glutamate receptor binding	12/2065	76/28407	0.00845844	0.0374579	0.0259692	Canx/Ube2i/Calm3/Ctnnb1/Snx27/Nsf/Dlg1/Pten/Gnas/Ptpn4/Eml2/Neto2	12
MF	GO:0140299	small molecule sensor activity	7/2065	33/28407	0.0084784	0.0374579	0.0259692	Msh6/Mlh1/Rad51d/Xrcc3/Xpc/Rad51c/Msh5	7
MF	GO:0000014	single-stranded DNA endodeoxyribonuclease activity	4/2065	12/28407	0.00858198	0.0376072	0.0260728	Ptbp1/Rbbp8/Ercc4/Setmar	4
MF	GO:0050815	phosphoserine residue binding	4/2065	12/28407	0.00858198	0.0376072	0.0260728	Ywhae/Scaf4/Pcif1/Leo1	4
MF	GO:0015459	potassium channel regulator activity	9/2065	50/28407	0.00922286	0.0400897	0.0277939	Ywhae/Flna/Wnk1/Akt1/Kcnab2/Arpp19/Dlg1/Slc5a3/Amigo1	9
MF	GO:0031491	nucleosome binding	9/2065	50/28407	0.00922286	0.0400897	0.0277939	Noc2l/Parp1/Arid1a/Arid1b/Mllt10/Rnf168/Znhit1/Rnf169/H1f0	9
MF	GO:0000049	tRNA binding	12/2065	77/28407	0.00937454	0.0405854	0.0281375	Nat10/Eif2a/Trnt1/Aimp1/Ctu2/Wdr6/Dalrd3/Sars2/Aars2/Dus2/Ctu1/Trmt10b	12
MF	GO:0140104	molecular carrier activity	14/2065	96/28407	0.00945058	0.0405904	0.028141	Eif4enif1/Xpo6/Kpna4/Ipo9/Xpo7/Nup214/Emc10/Nubp2/Mtch1/Asf1b/Nubp1/Hikeshi/Vps72/Atp7a	14
MF	GO:0001091	RNA polymerase II general transcription initiation factor binding	6/2065	26/28407	0.00952606	0.0405904	0.028141	Taf1/Gtf2e2/Gtf2a1/Crebbp/Ctdp1/Ercc4	6
MF	GO:0070412	R-SMAD binding	6/2065	26/28407	0.00952606	0.0405904	0.028141	Parp1/Drosha/Axin1/Trim33/Smad2/Zc3h3	6
MF	GO:0030544	Hsp70 protein binding	10/2065	59/28407	0.0095457	0.0405904	0.028141	Fkbp1a/Dnaja1/Dnaja2/St13/Bag6/Dnajb6/Nr3c1/Hikeshi/Dnajb12/Hdac8	10
MF	GO:0043539	protein serine/threonine kinase activator activity	11/2065	68/28407	0.00956397	0.0405904	0.028141	Calm3/Tgfb1/Map2k2/Cks1b/Rheb/Ccnt2/Ccnk/Dele1/Parp6/Mtcp1/Spry2	11
MF	GO:0035613	RNA stem-loop binding	5/2065	19/28407	0.00992656	0.041964	0.0290933	Dazap1/Eif4a3/Fmr1/Rc3h2/Zc3h12a	5
MF	GO:0051879	Hsp90 protein binding	9/2065	51/28407	0.0104947	0.0441925	0.0306383	Arhgdia/Ahsa1/Usp19/Hsf1/Tsc2/Nr3c1/Unc45a/Hdac6/Hdac8	9
MF	GO:0051082	unfolded protein binding	13/2065	88/28407	0.0109178	0.0457952	0.0317495	Canx/Hsp90b1/Dnaja1/Dnaja2/Nudc/St13/Dnajb6/Aip/Pfdn6/Pdrg1/Grpel2/Dnajb5/Erlec1	13
MF	GO:0052866	phosphatidylinositol phosphate phosphatase activity	6/2065	27/28407	0.0115099	0.0480916	0.0333415	Pten/Mtmr2/Synj1/Inpp4a/Inpp5e/Pip4p2	6
MF	GO:0000340	RNA 7-methylguanosine cap binding	4/2065	13/28407	0.0116919	0.0484764	0.0336083	Larp1/Ago2/Fmr1/Dcps	4
MF	GO:0005338	nucleotide-sugar transmembrane transporter activity	4/2065	13/28407	0.0116919	0.0484764	0.0336083	Slc35c1/Slc35b1/Slc35d1/Slc35e3	4
MF	GO:0022853	active monoatomic ion transmembrane transporter activity	27/2065	234/28407	0.0117504	0.0485323	0.0336471	Atp1a1/Atp2a2/Ghitm/Atp1b3/Slc38a2/Uqcrfs1/Slc6a6/Slc19a1/Slc20a1/Letm1/Cox5a/Atp6v1b2/Atp6v1f/Atp6v1h/Atp6v1e1/Slc5a3/Slc23a2/Atp6v1d/Slc20a2/Atp13a2/Slc28a2/Mfsd2a/Slc39a8/Slc6a9/Slc4a8/Atp7a/Slc18a2	27
MF	GO:0005548	phospholipid transporter activity	10/2065	61/28407	0.0120179	0.0494477	0.0342817	Pitpnm2/Gltp/Atp10a/Plscr1/Pitpnb/Pitpnc1/Osbpl2/Atp8a1/Mfsd2a/Prelid2	10
MF	GO:0016798	hydrolase activity, acting on glycosyl bonds	18/2065	139/28407	0.012119	0.0496741	0.0344386	Mogs/Man1a2/Man2a1/Man2c1/Man1b1/Gaa/Gne/Glb1/Dnph1/Man2b2/Nagpa/Gba2/Mbd4/Idua/Gla/Ctbs/Nthl1/Il18r1	18

## Sheet: yellow_module
ONTOLOGY	ID	Description	GeneRatio	BgRatio	pvalue	p.adjust	qvalue	geneID	Count
BP	GO:0140014	mitotic nuclear division	41/921	267/28891	7.03258e-17	3.29757e-13	2.86781e-13	Ran/Ube2s/Pebp1/Wapl/Ccnb1/Tpx2/Drg1/Bub1b/Birc5/Ube2c/Ncapd3/Cenpe/Cdk11b/Nusap1/Cdca8/Zw10/Kif22/Chek1/Fbxo5/Kif3b/Ndc80/Kif2c/Anapc7/Bora/Eml3/Aurka/Chmp2a/Cdca2/Mis12/Nsl1/Sirt1/Cenpc1/Brox/Reep4/Nek2/Cul7/Vps4a/Cdc14b/Lcmt1/Bmp7/Hspa1b	41
BP	GO:0045786	negative regulation of cell cycle	49/921	400/28891	8.10245e-16	1.04113e-12	9.05439e-13	Nsun2/Ets1/Casp3/Wapl/Ccnb1/Dtl/Rad51/Bub1b/Birc5/Cenpe/Cdca8/Nr4a1/Brca1/Zw10/Brd7/Sin3b/Chek1/Casp2/Ppp1r10/Rnaseh2b/Fbxo5/Zfp36l1/Tiprl/Ndc80/Sde2/Atf2/Aurka/Chmp2a/Rhno1/Orc1/Sirt1/Stil/Nek2/Eif2ak4/Vps4a/Miip/Atrip/Lcmt1/Ppp2r3d/Mdm1/Ptpn3/Prmt2/Fbxo4/Ctdspl/Bmp7/Rad9b/Mapk12/Mrnip/Rps6ka2	49
BP	GO:0010948	negative regulation of cell cycle process	43/921	314/28891	8.85893e-16	1.04113e-12	9.05439e-13	Nsun2/Wapl/Ccnb1/Dtl/Rad51/Bub1b/Birc5/Cenpe/Cdca8/Brca1/Zw10/Brd7/Chek1/Casp2/Ppp1r10/Rnaseh2b/Fbxo5/Zfp36l1/Tiprl/Ndc80/Sde2/Atf2/Aurka/Chmp2a/Rhno1/Orc1/Sirt1/Stil/Nek2/Eif2ak4/Vps4a/Miip/Atrip/Lcmt1/Ppp2r3d/Mdm1/Prmt2/Fbxo4/Ctdspl/Bmp7/Rad9b/Mrnip/Rps6ka2	43
BP	GO:0007059	chromosome segregation	50/921	416/28891	8.88144e-16	1.04113e-12	9.05439e-13	Tubb5/Ran/Wapl/Smc6/Ccnb1/Tpx2/Drg1/Bub1b/Birc5/Ube2c/Ncapd3/Tacc3/Cenpe/Nusap1/Cdca8/Brca1/Zw10/Brd7/Tubgcp3/Kif22/Cenpf/Arid2/Fbxo5/Kif3b/Ndc80/Dlgap5/Ccne2/Kif2c/Anapc7/Eml3/Aurka/Chmp2a/Cdca2/Mis12/Trappc12/Nsl1/Sirt1/Cenpc1/Stil/Nek2/Vps4a/Ccnb2/Cenpl/Lcmt1/Cenps/Terf1/Tex15/Cenpu/Syde1/Hspa1b	50
BP	GO:0000280	nuclear division	52/921	450/28891	1.21325e-15	1.13779e-12	9.89502e-13	Ran/Ube2s/Pebp1/Wapl/Fignl1/Ccnb1/Tpx2/Drg1/Rad51/Ubr2/Bub1b/Birc5/Ube2c/Ncapd3/Cenpe/Cdk11b/Nusap1/Cdca8/Zw10/Kif22/Chek1/Fbxo5/Kif3b/Ndc80/Ccne2/Kif2c/Anapc7/Bora/Eml3/Aurka/Chmp2a/Cdca2/Mis12/Nsl1/Cdc25b/Sirt1/Cenpc1/Brox/Reep4/Nek2/Cul7/Vps4a/Ccnb2/Cdc14b/Lcmt1/Cenps/Terf1/Tex15/Bmp7/Syde1/Hspa1b/Rps6ka2	52
BP	GO:0098813	nuclear chromosome segregation	40/921	312/28891	8.3052e-14	6.49051e-11	5.64462e-11	Ran/Wapl/Ccnb1/Tpx2/Drg1/Bub1b/Birc5/Ube2c/Ncapd3/Tacc3/Cenpe/Nusap1/Cdca8/Zw10/Brd7/Kif22/Cenpf/Arid2/Fbxo5/Kif3b/Ndc80/Ccne2/Kif2c/Anapc7/Eml3/Aurka/Chmp2a/Mis12/Trappc12/Nsl1/Sirt1/Cenpc1/Nek2/Vps4a/Ccnb2/Lcmt1/Terf1/Tex15/Syde1/Hspa1b	40
BP	GO:0000070	mitotic sister chromatid segregation	29/921	177/28891	4.52325e-13	2.93105e-10	2.54905e-10	Ran/Wapl/Ccnb1/Tpx2/Drg1/Bub1b/Birc5/Ube2c/Ncapd3/Cenpe/Nusap1/Cdca8/Zw10/Kif22/Fbxo5/Kif3b/Ndc80/Kif2c/Anapc7/Eml3/Chmp2a/Mis12/Nsl1/Sirt1/Cenpc1/Nek2/Vps4a/Lcmt1/Hspa1b	29
BP	GO:1901988	negative regulation of cell cycle phase transition	36/921	271/28891	5.00073e-13	2.93105e-10	2.54905e-10	Nsun2/Ccnb1/Dtl/Rad51/Bub1b/Birc5/Cenpe/Cdca8/Brca1/Zw10/Brd7/Chek1/Casp2/Ppp1r10/Rnaseh2b/Fbxo5/Zfp36l1/Tiprl/Ndc80/Sde2/Atf2/Aurka/Rhno1/Orc1/Stil/Eif2ak4/Vps4a/Miip/Atrip/Lcmt1/Ppp2r3d/Prmt2/Fbxo4/Ctdspl/Rad9b/Mrnip	36
BP	GO:0000819	sister chromatid segregation	32/921	218/28891	6.3617e-13	3.31445e-10	2.88248e-10	Ran/Wapl/Ccnb1/Tpx2/Drg1/Bub1b/Birc5/Ube2c/Ncapd3/Tacc3/Cenpe/Nusap1/Cdca8/Zw10/Brd7/Kif22/Arid2/Fbxo5/Kif3b/Ndc80/Kif2c/Anapc7/Eml3/Chmp2a/Mis12/Nsl1/Sirt1/Cenpc1/Nek2/Vps4a/Lcmt1/Hspa1b	32
BP	GO:1901987	regulation of cell cycle phase transition	47/921	449/28891	1.10608e-12	5.1864e-10	4.51047e-10	Nsun2/Ccnb1/Dtl/Rad51/Bub1b/Birc5/Ube2c/Cenpe/Dbf4/Cdca8/Brca1/Zw10/Brd7/Cenpf/Chek1/Arid2/Casp2/Ppp1r10/Rnaseh2b/Fbxo5/Zfp36l1/Tiprl/Ndc80/Sde2/Atf2/Anapc7/Aurka/Rhno1/Orc1/Cdc25b/Stil/Eif2ak4/Vps4a/Miip/Mecp2/Atrip/Cirbp/Cdc14b/Lcmt1/Ppp2r3d/Rrm2b/Prmt2/Fbxo4/Ctdspl/Rad9b/Mrnip/Ing4	47
BP	GO:1902850	microtubule cytoskeleton organization involved in mitosis	26/921	160/28891	8.85101e-12	3.77294e-09	3.28122e-09	Ccnb1/Tpx2/Drg1/Birc5/Tacc3/Cenpe/Nusap1/Cdca8/Cenpa/Zw10/Sbds/Kif3b/Ndc80/Dlgap5/Bora/Eml3/Aurka/Chmp2a/Tacc1/Stil/Nek2/Mecp2/Dctn6/Sapcd2/Poc1a/Hspa1b	26
BP	GO:0033044	regulation of chromosome organization	32/921	244/28891	1.39015e-11	5.432e-09	4.72406e-09	Hnrnpa2b1/Ruvbl2/Wapl/Ccnb1/Wdhd1/Bub1b/Birc5/Ube2c/Tacc3/Dcp2/Cenpe/Cdca8/Zw10/Brd7/Arid2/Ppp1r10/Fbxo5/Ndc80/Anapc7/Xrcc1/Nfrkb/Slf1/Trappc12/Sirt1/Nek2/Map2k7/Hmbox1/Lcmt1/Terf1/Pif1/Fbxo4/Lmna	32
BP	GO:0000075	cell cycle checkpoint signaling	29/921	204/28891	1.71799e-11	6.19666e-09	5.38906e-09	Nsun2/Ccnb1/Dtl/Rad51/Bub1b/Birc5/Cenpe/Cdca8/Brca1/Zw10/Chek1/Casp2/Ppp1r10/Rnaseh2b/Tiprl/Ndc80/Sde2/Atf2/Aurka/Rhno1/Orc1/Stil/Eif2ak4/Vps4a/Atrip/Lcmt1/Fbxo4/Rad9b/Mrnip	29
BP	GO:0008380	RNA splicing	44/921	449/28891	5.22974e-11	1.75159e-08	1.52331e-08	Hnrnpa2b1/Hnrnpa1/Srsf6/Luc7l2/Psip1/Prpf38b/Prpf31/Tcerg1/Zranb2/Rbm17/Rbmxl1/Snrpa/Clns1a/Usp39/Rbm5/Ddx47/Ppil1/Hnrnph2/Zfp638/Bcas2/Fxr2/Sap18/Prpf6/Ythdc1/Fastk/Clk2/Sde2/Prpf18/Zcchc8/Taf12/Zrsr2/Tssc4/Thoc6/Tsen54/Usb1/Aar2/Zfp326/Atxn7/Cirbp/Cwc25/Yju2/Supt3/Snrnp35/Rbm44	44
BP	GO:0007052	mitotic spindle organization	22/921	127/28891	9.72962e-11	3.04148e-08	2.64509e-08	Ccnb1/Tpx2/Drg1/Birc5/Tacc3/Cenpe/Cdca8/Sbds/Kif3b/Ndc80/Dlgap5/Bora/Eml3/Aurka/Chmp2a/Tacc1/Stil/Nek2/Mecp2/Dctn6/Poc1a/Hspa1b	22
BP	GO:0044772	mitotic cell cycle phase transition	43/921	454/28891	2.54644e-10	7.46266e-08	6.49007e-08	Calm1/Ube2s/Ccnb1/Dtl/Bub1b/Birc5/Ube2c/Tacc3/Cenpe/Dbf4/Cdca8/Brca1/Zw10/Brd7/Cenpf/Chek1/Arid2/Casp2/Rnaseh2b/Fbxo5/Zfp36l1/Ndc80/Cacul1/Sde2/Ccne2/Anapc7/Chmp2a/Orc1/Cdc25b/Stil/Vps4a/Miip/Mecp2/Ccnb2/Camk2g/Cdc14b/Lcmt1/Ppp2r3d/Rrm2b/Kdm8/Prmt2/Ctdspl/Mrnip	43
BP	GO:0050000	chromosome localization	20/921	115/28891	6.40001e-10	1.76527e-07	1.53521e-07	Ccnb1/Birc5/Cenpe/Cdca8/Zw10/Kif22/Cenpf/Ndc80/Kif2c/Eml3/Chmp2a/Mis12/Trappc12/Nsl1/Sirt1/Cenpc1/Nek2/Vps4a/Terf1/Lmna	20
BP	GO:0007051	spindle organization	26/921	194/28891	7.04261e-10	1.8346e-07	1.5955e-07	Tubb5/Ccnb1/Tpx2/Drg1/Birc5/Tacc3/Cenpe/Cdca8/Tubgcp3/Sbds/Fbxo5/Kif3b/Ndc80/Dlgap5/Bora/Eml3/Aurka/Chmp2a/Tacc1/Stil/Nek2/Mecp2/Dctn6/Ccnb2/Poc1a/Hspa1b	26
BP	GO:0051310	metaphase chromosome alignment	18/921	94/28891	9.05187e-10	2.12461e-07	1.84772e-07	Ccnb1/Birc5/Cenpe/Cdca8/Zw10/Kif22/Cenpf/Ndc80/Kif2c/Eml3/Chmp2a/Mis12/Trappc12/Nsl1/Sirt1/Cenpc1/Nek2/Vps4a	18
BP	GO:0051656	establishment of organelle localization	44/921	491/28891	9.06212e-10	2.12461e-07	1.84772e-07	Ran/Picalm/Ccnb1/Copg1/Birc5/Tacc3/Cenpe/Nusap1/Cdca8/Cenpa/Ap3d1/Zw10/Rab27a/Kif22/Cenpf/Sun2/Ndc80/Kif2c/Eml3/Chmp2a/Tacc1/Kxd1/Mis12/Trappc12/Nsl1/Sirt1/Cenpc1/Nek2/Vps4a/Mecp2/Sapcd2/Trappc1/Dtnbp1/Terf1/Tspan4/Ccdc186/Ap1s2/Cep19/Myh10/Borcs7/Bloc1s5/Hmox1/Lmna/Milr1	44
BP	GO:0045930	negative regulation of mitotic cell cycle	29/921	243/28891	1.19501e-09	2.66828e-07	2.32053e-07	Ccnb1/Dtl/Bub1b/Birc5/Cenpe/Cdca8/Brca1/Zw10/Brd7/Chek1/Casp2/Ppp1r10/Fbxo5/Zfp36l1/Ndc80/Sde2/Atf2/Orc1/Stil/Vps4a/Miip/Lcmt1/Ppp2r3d/Ptpn3/Prmt2/Ctdspl/Bmp7/Rad9b/Mrnip	29
BP	GO:0051303	establishment of chromosome localization	19/921	109/28891	1.64209e-09	3.45825e-07	3.00754e-07	Ccnb1/Birc5/Cenpe/Cdca8/Zw10/Kif22/Cenpf/Ndc80/Kif2c/Eml3/Chmp2a/Mis12/Trappc12/Nsl1/Sirt1/Cenpc1/Nek2/Vps4a/Terf1	19
BP	GO:0007080	mitotic metaphase chromosome alignment	14/921	56/28891	1.6963e-09	3.45825e-07	3.00754e-07	Ccnb1/Birc5/Cenpe/Cdca8/Zw10/Kif22/Ndc80/Kif2c/Eml3/Chmp2a/Mis12/Sirt1/Cenpc1/Vps4a	14
BP	GO:0140053	mitochondrial gene expression	23/921	166/28891	3.49985e-09	6.83783e-07	5.94667e-07	Fastk/Mrpl38/Mrpl17/Mrpl51/Mrps24/Mrpl23/Mrpl19/Gfm2/Mrpl48/Mrpl16/Tsfm/Mrps6/Mrps18a/Mrpl57/Dars2/Uqcc2/Mterf3/Mrpl27/Mto1/Ptcd1/Mtrf1l/Sirt3/Mtrf1	23
BP	GO:0006282	regulation of DNA repair	26/921	212/28891	4.7968e-09	8.99687e-07	7.82433e-07	Ruvbl2/Fignl1/Rad51/Brd8/Brca1/Otub1/Brd7/Chek1/Arid2/Xrcc1/Nfrkb/Taf12/Slf1/Mrgbp/Kmt5b/Sirt1/Ccdc117/Atrip/Atxn7/Tigar/Parpbp/Wrap53/Nudt16l1/Supt3/Tex15/Mrnip	26
BP	GO:0006260	DNA replication	30/921	276/28891	5.73817e-09	1.03486e-06	8.99987e-07	Mcm5/Dnajc2/Ruvbl2/Wapl/Dtl/Mcm10/Wdhd1/Rad51/Pole4/Dbf4/Brca1/Fbxo5/Chaf1b/Sde2/Rtf2/Map2k4/Ccne2/Gins2/Nfrkb/Chrac1/Orc1/Dtd1/Ttf1/Atg7/Cenps/Jade3/Exd2/Terf1/Rrm2b/Pif1	30
BP	GO:1901990	regulation of mitotic cell cycle phase transition	34/921	343/28891	6.09097e-09	1.0578e-06	9.19939e-07	Ccnb1/Dtl/Bub1b/Birc5/Ube2c/Cenpe/Dbf4/Cdca8/Brca1/Zw10/Brd7/Cenpf/Chek1/Arid2/Casp2/Rnaseh2b/Fbxo5/Zfp36l1/Ndc80/Sde2/Anapc7/Orc1/Cdc25b/Stil/Vps4a/Miip/Mecp2/Cdc14b/Lcmt1/Ppp2r3d/Rrm2b/Prmt2/Ctdspl/Mrnip	34
BP	GO:0007088	regulation of mitotic nuclear division	19/921	119/28891	7.47929e-09	1.25251e-06	1.08928e-06	Pebp1/Ccnb1/Bub1b/Birc5/Ube2c/Cenpe/Cdk11b/Nusap1/Cdca8/Zw10/Chek1/Fbxo5/Ndc80/Anapc7/Bora/Cdca2/Cul7/Lcmt1/Bmp7	19
BP	GO:0140694	non-membrane-bounded organelle assembly	37/921	402/28891	9.75779e-09	1.57773e-06	1.37211e-06	Tubb5/mt-Rnr1/Arpc2/Eif5b/Tpx2/Drg1/Birc5/Cenpe/Cdca8/G3bp2/Cenpa/Tubgcp3/Sbds/Fbxo5/Kif3b/Surf6/Ndc80/Dlgap5/Eml3/Aurka/Chmp2a/Mis12/Trappc12/Tpm1/Mef2a/Cenpc1/Stil/Nek2/Mterf3/Ccnb2/Cirbp/Cntrob/Mdm1/Cfl2/Myh10/Tnnt1/Hspa1b	37
BP	GO:1901991	negative regulation of mitotic cell cycle phase transition	23/921	182/28891	2.0782e-08	3.24822e-06	2.82489e-06	Ccnb1/Dtl/Bub1b/Birc5/Cenpe/Cdca8/Brca1/Zw10/Brd7/Chek1/Casp2/Fbxo5/Zfp36l1/Ndc80/Sde2/Orc1/Vps4a/Miip/Lcmt1/Ppp2r3d/Prmt2/Ctdspl/Mrnip	23
BP	GO:0032543	mitochondrial translation	19/921	130/28891	3.30399e-08	4.92156e-06	4.28015e-06	Mrpl38/Mrpl17/Mrpl51/Mrps24/Mrpl23/Mrpl19/Gfm2/Mrpl48/Mrpl16/Tsfm/Mrps6/Mrps18a/Mrpl57/Dars2/Uqcc2/Mrpl27/Ptcd1/Mtrf1l/Mtrf1	19
BP	GO:0006397	mRNA processing	41/921	496/28891	3.35871e-08	4.92156e-06	4.28015e-06	Hnrnpa2b1/Hnrnpa1/Srsf6/Luc7l2/Psip1/Prpf38b/Prpf31/Tcerg1/Zranb2/Rbm17/Rbmxl1/Ccnb1/Snrpa/Clns1a/Usp39/Rbm5/Ddx47/Ppil1/Bcas2/Fxr2/Sap18/Prpf6/Rbm27/Ythdc1/Trmt2a/Tut1/Zfp36l1/Sde2/Prpf18/Zcchc8/Zrsr2/Tssc4/Thoc6/Tsen54/Aar2/Zfp326/Cirbp/Cwc25/Yju2/Snrnp35/Rbm44	41
BP	GO:0006310	DNA recombination	32/921	333/28891	3.5381e-08	5.02733e-06	4.37213e-06	Mcm5/Ruvbl2/Smc6/Fignl1/Rad51/Ubr2/Brd8/Brca1/Zmynd8/Ung/Chek1/Arid2/Gins2/Xrcc1/Nfrkb/Rhno1/Mrgbp/Kmt5b/Pms2/Nfkbiz/Palb2/Parpbp/Wrap53/Cenps/Apex2/Exd2/Dclre1c/Tex15/Tnfsf4/Pif1/Zswim7/Mrnip	32
BP	GO:1901976	regulation of cell cycle checkpoint	12/921	50/28891	4.08067e-08	5.62772e-06	4.89427e-06	Ccnb1/Rad51/Birc5/Cdca8/Brca1/Ppp1r10/Rnaseh2b/Ndc80/Atf2/Aurka/Lcmt1/Fbxo4	12
BP	GO:0051983	regulation of chromosome segregation	19/921	132/28891	4.25194e-08	5.69639e-06	4.95399e-06	Smc6/Ccnb1/Bub1b/Birc5/Ube2c/Ncapd3/Tacc3/Cenpe/Cdca8/Zw10/Brd7/Arid2/Fbxo5/Ndc80/Kif2c/Anapc7/Cdca2/Sirt1/Lcmt1	19
BP	GO:0007093	mitotic cell cycle checkpoint signaling	20/921	151/28891	7.81516e-08	1.01793e-05	8.85262e-06	Ccnb1/Dtl/Bub1b/Birc5/Cenpe/Cdca8/Brca1/Zw10/Chek1/Casp2/Ppp1r10/Ndc80/Sde2/Atf2/Orc1/Stil/Vps4a/Lcmt1/Rad9b/Mrnip	20
BP	GO:0090068	positive regulation of cell cycle process	28/921	276/28891	8.07602e-08	1.02347e-05	8.90086e-06	Pebp1/Smc6/Ccnb1/Dtl/Birc5/Ube2c/Ncapd3/Cenpe/Dbf4/Nusap1/Cdca8/Ppp1r10/Fbxo5/Kif3b/Pkn2/Ndc80/Anapc7/Aurka/Slf1/Rhno1/Chmp3/Orc1/Cdc25b/Stil/Mecp2/Cdc14b/Poc1a/Rrm2b	28
BP	GO:0051783	regulation of nuclear division	20/921	153/28891	9.75031e-08	1.20314e-05	1.04634e-05	Pebp1/Ccnb1/Bub1b/Birc5/Ube2c/Cenpe/Cdk11b/Nusap1/Cdca8/Zw10/Chek1/Fbxo5/Ndc80/Anapc7/Bora/Cdca2/Cul7/Lcmt1/Bmp7/Rps6ka2	20
BP	GO:0006302	double-strand break repair	29/921	296/28891	1.01391e-07	1.21903e-05	1.06015e-05	Mcm5/Ruvbl2/Smc6/Fignl1/Rad51/Hpf1/Brd8/Brca1/Otub1/Zmynd8/Brd7/Chek1/Arid2/Gins2/Xrcc1/Slf1/Mrgbp/Kmt5b/Sirt1/Atrip/Palb2/Parpbp/Wrap53/Nudt16l1/Exd2/Dclre1c/Tex15/Zswim7/Mrnip	29
BP	GO:0000725	recombinational repair	21/921	170/28891	1.25738e-07	1.47396e-05	1.28186e-05	Mcm5/Ruvbl2/Smc6/Fignl1/Rad51/Brd8/Brca1/Zmynd8/Chek1/Arid2/Gins2/Xrcc1/Rhno1/Mrgbp/Palb2/Parpbp/Wrap53/Exd2/Tex15/Zswim7/Mrnip	21
BP	GO:0044839	cell cycle G2/M phase transition	20/921	156/28891	1.34891e-07	1.54269e-05	1.34163e-05	Calm1/Ccnb1/Dtl/Birc5/Brca1/Cenpf/Chek1/Rnaseh2b/Fbxo5/Ndc80/Orc1/Cdc25b/Vps4a/Miip/Mecp2/Ccnb2/Rrm2b/Kdm8/Mrnip/Ing4	20
BP	GO:0051315	attachment of mitotic spindle microtubules to kinetochore	8/921	21/28891	1.45587e-07	1.62538e-05	1.41354e-05	Birc5/Cenpe/Cdca8/Ndc80/Kif2c/Mis12/Sirt1/Cenpc1	8
BP	GO:2000779	regulation of double-strand break repair	18/921	131/28891	1.97206e-07	2.11417e-05	1.83863e-05	Ruvbl2/Fignl1/Rad51/Brd8/Otub1/Brd7/Chek1/Arid2/Slf1/Mrgbp/Kmt5b/Sirt1/Atrip/Parpbp/Wrap53/Nudt16l1/Tex15/Mrnip	18
BP	GO:0008608	attachment of spindle microtubules to kinetochore	11/921	47/28891	1.98387e-07	2.11417e-05	1.83863e-05	Ccnb1/Birc5/Cenpe/Cdca8/Ndc80/Kif2c/Mis12/Nsl1/Sirt1/Cenpc1/Nek2	11
BP	GO:0000724	double-strand break repair via homologous recombination	20/921	166/28891	3.75222e-07	3.90981e-05	3.40026e-05	Mcm5/Ruvbl2/Smc6/Fignl1/Rad51/Brd8/Brca1/Zmynd8/Chek1/Arid2/Gins2/Xrcc1/Mrgbp/Palb2/Parpbp/Wrap53/Exd2/Tex15/Zswim7/Mrnip	20
BP	GO:0051225	spindle assembly	17/921	123/28891	3.9324e-07	4.00849e-05	3.48607e-05	Tubb5/Tpx2/Drg1/Birc5/Cenpe/Cdca8/Tubgcp3/Fbxo5/Kif3b/Ndc80/Eml3/Aurka/Chmp2a/Stil/Nek2/Ccnb2/Hspa1b	17
BP	GO:0051054	positive regulation of DNA metabolic process	29/921	321/28891	5.6052e-07	5.56701e-05	4.84148e-05	Hnrnpa2b1/Ruvbl2/Rad51/Dbf4/Brd8/Brca1/Brd7/Arid2/Ppp1r10/Map2k4/Xrcc1/Nfrkb/Slf1/Mrgbp/Gfer/Kmt5b/Sirt1/Pms2/Nek2/Map2k7/Ccdc117/Mecp2/Hmbox1/Tigar/Wrap53/Terf1/Tnfsf4/Fbxo4/Mrnip	29
BP	GO:0000375	RNA splicing, via transesterification reactions	28/921	304/28891	5.93625e-07	5.56701e-05	4.84148e-05	Hnrnpa2b1/Hnrnpa1/Srsf6/Luc7l2/Psip1/Prpf31/Rbm17/Rbmxl1/Snrpa/Clns1a/Usp39/Rbm5/Ppil1/Bcas2/Fxr2/Sap18/Prpf6/Ythdc1/Sde2/Prpf18/Zrsr2/Tssc4/Aar2/Cirbp/Cwc25/Yju2/Snrnp35/Rbm44	28
BP	GO:0000377	RNA splicing, via transesterification reactions with bulged adenosine as nucleophile	28/921	304/28891	5.93625e-07	5.56701e-05	4.84148e-05	Hnrnpa2b1/Hnrnpa1/Srsf6/Luc7l2/Psip1/Prpf31/Rbm17/Rbmxl1/Snrpa/Clns1a/Usp39/Rbm5/Ppil1/Bcas2/Fxr2/Sap18/Prpf6/Ythdc1/Sde2/Prpf18/Zrsr2/Tssc4/Aar2/Cirbp/Cwc25/Yju2/Snrnp35/Rbm44	28
BP	GO:0000398	mRNA splicing, via spliceosome	28/921	304/28891	5.93625e-07	5.56701e-05	4.84148e-05	Hnrnpa2b1/Hnrnpa1/Srsf6/Luc7l2/Psip1/Prpf31/Rbm17/Rbmxl1/Snrpa/Clns1a/Usp39/Rbm5/Ppil1/Bcas2/Fxr2/Sap18/Prpf6/Ythdc1/Sde2/Prpf18/Zrsr2/Tssc4/Aar2/Cirbp/Cwc25/Yju2/Snrnp35/Rbm44	28
BP	GO:0045787	positive regulation of cell cycle	31/921	365/28891	8.79439e-07	8.08567e-05	7.03189e-05	Pebp1/Smc6/Ccnb1/Dtl/Birc5/Ube2c/Ncapd3/Cenpe/Dbf4/Nusap1/Cdca8/Brca1/Chek1/Ppp1r10/Fbxo5/Kif3b/Pkn2/Ndc80/Anapc7/Aurka/BC004004/Slf1/Rhno1/Chmp3/Orc1/Cdc25b/Stil/Mecp2/Cdc14b/Poc1a/Rrm2b	31
BP	GO:0000723	telomere maintenance	18/921	145/28891	9.13881e-07	8.24075e-05	7.16675e-05	Hnrnpa2b1/Ruvbl2/Smc6/Rad51/Dcp2/Ppp1r10/Ccne2/Xrcc1/Nfrkb/Nek2/Map2k7/Hmbox1/Wrap53/Terf1/Dclre1c/Pif1/Fbxo4/Lmna	18
BP	GO:0010639	negative regulation of organelle organization	32/921	387/28891	1.05566e-06	9.33957e-05	8.12237e-05	Coro1a/Arpc2/Wapl/Ccnb1/Tpx2/Bub1b/Birc5/Dcp2/Cenpe/Cdca8/Zw10/Chek1/Fbxo5/Ndc80/Parl/Xrcc1/Tpm1/Atxn7/Tigar/Lcmt1/Twf1/Inpp5k/Pecam1/Mdm1/Adck1/Terf1/Pif1/Tbc1d7/Wdr44/Bmp7/Lmna/Rps6ka2	32
BP	GO:0006338	chromatin remodeling	37/921	489/28891	1.34139e-06	0.000114508	9.95843e-05	Ruvbl2/Psip1/Wdhd1/Ubr2/Mier1/Mbd2/Hpf1/Suds3/Ythdc1/Brca1/Cenpa/Chd2/Brd7/Chek1/Arid2/Msl3/Kdm4a/Chaf1b/Atf2/Nfrkb/BC004004/Trmt112/Chrac1/Kmt5b/Sirt1/Zfp110/Chd6/Hdac4/Mecp2/Ttf1/Nfkbiz/Bicral/Zfp369/Tex15/Klf2/Pcgf1/Lmna	37
BP	GO:0031570	DNA integrity checkpoint signaling	17/921	134/28891	1.34313e-06	0.000114508	9.95843e-05	Dtl/Rad51/Brca1/Chek1/Casp2/Ppp1r10/Rnaseh2b/Tiprl/Sde2/Atf2/Rhno1/Orc1/Eif2ak4/Atrip/Fbxo4/Rad9b/Mrnip	17
BP	GO:0033045	regulation of sister chromatid segregation	15/921	106/28891	1.38513e-06	0.00011598	0.000100865	Ccnb1/Bub1b/Birc5/Ube2c/Tacc3/Cenpe/Cdca8/Zw10/Brd7/Arid2/Fbxo5/Ndc80/Anapc7/Sirt1/Lcmt1	15
BP	GO:0032200	telomere organization	18/921	150/28891	1.50593e-06	0.000123883	0.000107737	Hnrnpa2b1/Ruvbl2/Smc6/Rad51/Dcp2/Ppp1r10/Ccne2/Xrcc1/Nfrkb/Nek2/Map2k7/Hmbox1/Wrap53/Terf1/Dclre1c/Pif1/Fbxo4/Lmna	18
BP	GO:0051383	kinetochore organization	7/921	20/28891	1.76266e-06	0.000142502	0.00012393	Cenpe/Cenpa/Ndc80/Dlgap5/Mis12/Trappc12/Cenpc1	7
BP	GO:0007091	metaphase/anaphase transition of mitotic cell cycle	14/921	95/28891	1.88775e-06	0.000150028	0.000130475	Ccnb1/Bub1b/Birc5/Ube2c/Tacc3/Cenpe/Cdca8/Zw10/Brd7/Arid2/Fbxo5/Ndc80/Anapc7/Lcmt1	14
BP	GO:0000086	G2/M transition of mitotic cell cycle	17/921	138/28891	2.03031e-06	0.000158669	0.00013799	Calm1/Ccnb1/Dtl/Birc5/Brca1/Cenpf/Chek1/Rnaseh2b/Fbxo5/Orc1/Cdc25b/Vps4a/Miip/Mecp2/Rrm2b/Kdm8/Mrnip	17
BP	GO:0051784	negative regulation of nuclear division	12/921	71/28891	2.32834e-06	0.000178977	0.000155652	Ccnb1/Bub1b/Birc5/Cenpe/Cdca8/Zw10/Chek1/Fbxo5/Ndc80/Lcmt1/Bmp7/Rps6ka2	12
BP	GO:0007144	female meiosis I	6/921	14/28891	2.49015e-06	0.000188327	0.000163783	Cenpe/Fbxo5/Ndc80/Aurka/Cdc25b/Ccnb2	6
BP	GO:0010965	regulation of mitotic sister chromatid separation	11/921	60/28891	2.67514e-06	0.000198996	0.000173061	Ccnb1/Bub1b/Birc5/Ube2c/Cenpe/Cdca8/Zw10/Fbxo5/Ndc80/Anapc7/Lcmt1	11
[truncated: 271 more rows]

## Sheet: greenyellow_module
ONTOLOGY	ID	Description	GeneRatio	BgRatio	pvalue	p.adjust	qvalue	geneID	Count
[truncated: 108 more rows]

## Sheet: midnightblue_module
ONTOLOGY	ID	Description	GeneRatio	BgRatio	pvalue	p.adjust	qvalue	geneID	Count
[truncated: 275 more rows]
