# Supplementary material for: Cytochrome c oxidase dependent respiration is essential for T cell activation, proliferation and memory formation
Source: Nat Commun. 2025 Dec 4;16:10898. doi: 10.1038/s41467-025-65910-w (PMC12678437; doi:10.1038/s41467-025-65910-w)
Supplement: Supplementary file 5 — Supplementary Data 3 [file 41467_2025_65910_MOESM5_ESM.xlsx]

## Sheet: oxphos
Cluster	group	ID	Description	setSize	enrichmentScore	NES	pvalue	p.adjust	qvalue	rank	leading_edge	core_enrichment
COX	COX	mtDNA	mtDNA	12	-0.747141	-2.05208	0.000301826	0.00633835	0.00508339	1115	tags=50%, list=8%, signal=46%	mt-Nd3/mt-Nd2/mt-Nd5/mt-Nd4/mt-Cytb/mt-Nd6
COX	COX	OXPHOS subunits	OXPHOS subunits	94	-0.38423	-1.68304	0.00114601	0.0120331	0.00965062	4441	tags=44%, list=31%, signal=30%	Ndufv2/Ndufa9/Ndufab1/Atp5c1/Ndufc1/Cox7a2/Cox7a2l/Cox6c/Ndufs4/Cycs/Ndufb9/Ndufb5/Ndufa1/Atp5j2/Ndufa4/Cox7b/Ndufa3/Cox6b1/Atp5l/Atp5mpl/Atp5o/Ndufs1/Cox5b/Ndufa5/Uqcrfs1/Uqcr10/Atp5j/Uqcr11/Ndufb11/mt-Nd3/Ndufs6/Cox8a/Sdhd/Atp5h/Atpif1/mt-Nd2/mt-Nd5/mt-Nd4/Ndufv3/mt-Cytb/mt-Nd6
COX	COX	CI subunits	CI subunits	43	-0.460658	-1.73341	0.00233831	0.0132716	0.0106439	1883	tags=23%, list=13%, signal=20%	Ndufs1/Ndufa5/Ndufb11/mt-Nd3/Ndufs6/mt-Nd2/mt-Nd5/mt-Nd4/Ndufv3/mt-Nd6
COX	COX	Complex I	Complex I	64	-0.407928	-1.64036	0.00252792	0.0132716	0.0106439	4441	tags=39%, list=31%, signal=27%	Ndufv2/Ndufa9/Aifm1/Ndufab1/Dmac2/Ndufc1/Tmem126b/Ndufs4/Ndufb9/Ndufb5/Ndufa1/Nubpl/Ndufa3/Ndufaf2/Ndufs1/Ndufa5/Ndufb11/mt-Nd3/Ndufs6/Foxred1/mt-Nd2/mt-Nd5/mt-Nd4/Ndufv3/mt-Nd6
COX	COX	OXPHOS	OXPHOS	156	-0.306981	-1.4515	0.00865022	0.0363309	0.0291376	4441	tags=39%, list=31%, signal=27%	Ndufv2/Ndufa9/Aifm1/Ndufab1/Dmac2/Sdhaf4/Atp5c1/Lyrm7/Ndufc1/Surf1/Timm21/Cox7a2/Sco1/Cox7a2l/Tmem126b/Cox6c/Cmc1/Ndufs4/Cycs/Ndufb9/Ndufb5/Ndufa1/Atp5j2/Ndufa4/Nubpl/Cox7b/Ndufa3/Coa6/Ndufaf2/Smim20/Cox6b1/Atp5l/Atpaf2/Atp5mpl/Atp5o/Ndufs1/Cox5b/Uqcc3/Cep89/Ndufa5/Uqcrfs1/Uqcr10/Atp5j/Uqcr11/Ndufb11/mt-Nd3/Cmc2/Ndufs6/Cox8a/Coa4/Sdhd/Atp5h/Foxred1/Atpif1/mt-Nd2/Higd1a/mt-Nd5/mt-Nd4/Ndufv3/mt-Cyt…
COX	COX	CV subunits	CV subunits	17	-0.468911	-1.40876	0.0720165	0.252058	0.202151	2429	tags=41%, list=17%, signal=34%	Atp5j2/Atp5l/Atp5mpl/Atp5o/Atp5j/Atp5h/Atpif1
COX	COX	Complex III	Complex III	16	-0.463657	-1.36885	0.0880503	0.264151	0.21185	1837	tags=31%, list=13%, signal=27%	Uqcc3/Uqcrfs1/Uqcr10/Uqcr11/mt-Cytb
COX	COX	CIII subunits	CIII subunits	10	-0.552877	-1.4148	0.105788	0.277695	0.222712	1620	tags=40%, list=11%, signal=36%	Uqcrfs1/Uqcr10/Uqcr11/mt-Cytb
COX	COX	Complex V	Complex V	21	-0.372324	-1.18097	0.226611	0.52876	0.424068	2429	tags=33%, list=17%, signal=28%	Atp5l/Atpaf2/Atp5mpl/Atp5o/Atp5j/Atp5h/Atpif1
COX	COX	CV assembly factors	CV assembly factors	4	0.600482	1.13104	0.361493	0.759136	0.608831	1398	tags=50%, list=10%, signal=45%	Fmc1/Atpaf1
COX	COX	Complex IV	Complex IV	44	-0.259295	-0.980175	0.503268	0.884021	0.708989	4066	tags=41%, list=28%, signal=29%	Surf1/Timm21/Cox7a2/Sco1/Cox7a2l/Cox6c/Cmc1/Ndufa4/Cox7b/Coa6/Smim20/Cox6b1/Cox5b/Cep89/Cmc2/Cox8a/Coa4/Higd1a
COX	COX	CIV subunits	CIV subunits	18	-0.317592	-0.966755	0.505155	0.884021	0.708989	5166	tags=61%, list=36%, signal=39%	Cox5a/Cox7c/Cox7a1/Cox7a2/Cox7a2l/Cox6c/Ndufa4/Cox7b/Cox6b1/Cox5b/Cox8a
COX	COX	Respirasome assembly	Respirasome assembly	4	-0.473339	-0.922023	0.565923	0.914183	0.733179	142	tags=75%, list=1%, signal=74%	Rab5if/Cox7a2l/Higd1a
COX	COX	CI assembly factors	CI assembly factors	21	-0.277887	-0.881425	0.638254	0.945791	0.758529	4335	tags=29%, list=30%, signal=20%	Aifm1/Dmac2/Tmem126b/Nubpl/Ndufaf2/Foxred1
COX	COX	Cytochrome C	Cytochrome C	2	-0.570396	-0.878894	0.675565	0.945791	0.758529	3635	tags=100%, list=25%, signal=75%	Cycs
COX	COX	CIV assembly factors	CIV assembly factors	26	-0.239192	-0.794839	0.797441	0.982249	0.787768	4066	tags=38%, list=28%, signal=28%	Surf1/Timm21/Sco1/Cmc1/Coa6/Smim20/Cep89/Cmc2/Coa4/Higd1a
COX	COX	OXPHOS assembly factors	OXPHOS assembly factors	63	-0.176771	-0.711314	0.935412	0.982249	0.787768	4335	tags=33%, list=30%, signal=23%	Aifm1/Dmac2/Sdhaf4/Lyrm7/Surf1/Timm21/Sco1/Cox7a2l/Tmem126b/Cmc1/Nubpl/Coa6/Ndufaf2/Smim20/Atpaf2/Uqcc3/Cep89/Cmc2/Coa4/Foxred1/Higd1a
COX	COX	CII subunits	CII subunits	4	-0.354453	-0.690445	0.811359	0.982249	0.787768	824	tags=25%, list=6%, signal=24%	Sdhd
COX	COX	Complex II	Complex II	8	0.256921	0.602926	0.918095	0.982249	0.787768	3459	tags=38%, list=24%, signal=29%	Sdha/Sdhaf1/Sdhc
COX	COX	CII assembly factors	CII assembly factors	4	0.294587	0.554872	0.948919	0.982249	0.787768	10169	tags=100%, list=71%, signal=29%	Sdhaf1/Sdhaf3/Sdhaf2/Sdhaf4
COX	COX	CIII assembly factors	CIII assembly factors	6	-0.223861	-0.497013	0.982249	0.982249	0.787768	4218	tags=50%, list=29%, signal=35%	Bcs1l/Lyrm7/Uqcc3
DKO	DKO	mtDNA	mtDNA	13	0.874417	2.43849	8.0054e-08	1.68113e-06	1.34828e-06	62	tags=46%, list=0%, signal=46%	mt-Cytb/mt-Nd6/mt-Nd5/mt-Nd4/mt-Nd3/mt-Nd2
DKO	DKO	Complex I	Complex I	64	0.421815	1.74547	0.000810039	0.00850541	0.00682138	3096	tags=30%, list=21%, signal=24%	mt-Nd6/mt-Nd5/mt-Nd4/mt-Nd3/mt-Nd2/Ndufs1/Acad9/Aifm1/Ndufa9/Ndufaf4/Ndufb5/Ndufa5/Ndufb2/Foxred1/Ndufaf7/mt-Nd1/Ndufs6/Timmdc1/Ndufab1
DKO	DKO	CI subunits	CI subunits	43	0.473151	1.82635	0.00141131	0.00987918	0.00792316	1853	tags=23%, list=13%, signal=20%	mt-Nd6/mt-Nd5/mt-Nd4/mt-Nd3/mt-Nd2/Ndufs1/Ndufa9/Ndufb5/Ndufa5/Ndufb2
DKO	DKO	OXPHOS subunits	OXPHOS subunits	95	0.324545	1.45032	0.0145367	0.0763178	0.0612073	4796	tags=46%, list=33%, signal=31%	mt-Cytb/mt-Nd6/mt-Nd5/mt-Nd4/mt-Nd3/mt-Nd2/Ndufs1/Atp5c1/Atpif1/Atp5h/Uqcrc2/Ndufa9/Ndufb5/Ndufa5/Hccs/Ndufb2/Sdhb/Atp5mpl/Uqcr10/Sdhd/Cox7c/Atp5j/mt-Nd1/Atp5l/Ndufs6/Ndufab1/Cox7b/Ndufb9/Cox6b1/mt-Co3/Cox8a/Ndufa10/Cox5b/Cycs/Ndufa4/Cox6c/Atp5g1/Cox7a2l/Cox7a2/Ndufc1/mt-Co1/Ndufv1/Ndufa3/Cox7a1
DKO	DKO	OXPHOS	OXPHOS	157	0.28249	1.36496	0.0190443	0.0799861	0.0641493	3096	tags=26%, list=21%, signal=21%	mt-Cytb/mt-Nd6/mt-Nd5/mt-Nd4/mt-Nd3/mt-Nd2/Ndufs1/Cep89/Coa4/Atp5c1/Atpif1/Atp5h/Cmc2/Acad9/Lyrm7/Uqcrc2/Aifm1/Ndufa9/Ndufaf4/Ndufb5/Ndufa5/Timm21/Hccs/Ndufb2/Sdhb/Atp5mpl/Foxred1/Uqcr10/Cmc1/Sdhd/Cox7c/Ndufaf7/Atp5j/mt-Nd1/Coa5/Smim20/Atp5l/Ndufs6/Sdhaf3/Timmdc1/Ndufab1
DKO	DKO	Cytochrome C	Cytochrome C	2	0.722743	1.11671	0.334021	0.865672	0.694273	4081	tags=100%, list=28%, signal=72%	Hccs/Cycs
DKO	DKO	Respirasome assembly	Respirasome assembly	4	-0.604661	-1.10412	0.369606	0.865672	0.694273	1339	tags=50%, list=9%, signal=45%	Higd1a/Higd2a
DKO	DKO	CV subunits	CV subunits	18	0.35379	1.07566	0.324074	0.865672	0.694273	2895	tags=33%, list=20%, signal=27%	Atp5c1/Atpif1/Atp5h/Atp5mpl/Atp5j/Atp5l
DKO	DKO	CI assembly factors	CI assembly factors	21	0.324033	1.02053	0.427252	0.865672	0.694273	3074	tags=29%, list=21%, signal=23%	Acad9/Aifm1/Ndufaf4/Foxred1/Ndufaf7/Timmdc1
DKO	DKO	CV assembly factors	CV assembly factors	4	-0.531911	-0.971278	0.5197	0.865672	0.694273	4976	tags=75%, list=34%, signal=50%	Tmem70/Atpaf1/Fmc1
DKO	DKO	CIII subunits	CIII subunits	10	0.379588	0.960025	0.508696	0.865672	0.694273	2208	tags=30%, list=15%, signal=26%	mt-Cytb/Uqcrc2/Uqcr10
DKO	DKO	Complex III	Complex III	16	0.319974	0.944759	0.535242	0.865672	0.694273	2208	tags=25%, list=15%, signal=21%	mt-Cytb/Lyrm7/Uqcrc2/Uqcr10
DKO	DKO	CIV assembly factors	CIV assembly factors	26	0.266143	0.898522	0.600462	0.865672	0.694273	2838	tags=27%, list=19%, signal=22%	Cep89/Coa4/Cmc2/Timm21/Cmc1/Coa5/Smim20
DKO	DKO	Complex V	Complex V	22	0.272832	0.8666	0.657277	0.865672	0.694273	2895	tags=27%, list=20%, signal=22%	Atp5c1/Atpif1/Atp5h/Atp5mpl/Atp5j/Atp5l
DKO	DKO	OXPHOS assembly factors	OXPHOS assembly factors	63	0.209067	0.864516	0.738579	0.865672	0.694273	3074	tags=24%, list=21%, signal=19%	Cep89/Coa4/Cmc2/Acad9/Lyrm7/Aifm1/Ndufaf4/Timm21/Foxred1/Cmc1/Ndufaf7/Coa5/Smim20/Sdhaf3/Timmdc1
DKO	DKO	CII assembly factors	CII assembly factors	4	0.443617	0.851854	0.639659	0.865672	0.694273	3763	tags=50%, list=26%, signal=37%	Sdhaf3/Sdhaf2
DKO	DKO	Complex II	Complex II	8	0.352385	0.844948	0.660256	0.865672	0.694273	3763	tags=50%, list=26%, signal=37%	Sdhb/Sdhd/Sdhaf3/Sdhaf2
DKO	DKO	CII subunits	CII subunits	4	0.399804	0.767723	0.742004	0.865672	0.694273	2301	tags=50%, list=16%, signal=42%	Sdhb/Sdhd
DKO	DKO	CIV subunits	CIV subunits	18	0.248108	0.754348	0.824074	0.910819	0.730481	5101	tags=72%, list=35%, signal=47%	Cox7c/Cox7b/Cox6b1/mt-Co3/Cox8a/Cox5b/Ndufa4/Cox6c/Cox7a2l/Cox7a2/mt-Co1/Cox7a1/mt-Co2
DKO	DKO	Complex IV	Complex IV	44	0.190496	0.735735	0.920792	0.920792	0.73848	4796	tags=45%, list=33%, signal=31%	Cep89/Coa4/Cmc2/Timm21/Cmc1/Cox7c/Coa5/Smim20/Cox7b/Cox6b1/mt-Co3/Cox8a/Cox5b/Surf1/Ndufa4/Cox6c/Cox7a2l/Cox7a2/mt-Co1/Cox7a1
DKO	DKO	CIII assembly factors	CIII assembly factors	6	0.289824	0.636353	0.896624	0.920792	0.73848	5895	tags=83%, list=40%, signal=50%	Lyrm7/Uqcc1/Uqcc3/Ttc19/Bcs1l

## Sheet: dogma
Cluster	group	ID	Description	setSize	enrichmentScore	NES	pvalue	p.adjust	qvalue	rank	leading_edge	core_enrichment
COX	COX	Transcription	Transcription	8	-0.665672	-1.5541	0.0282193	0.592606	0.592606	273	tags=75%, list=2%, signal=74%	Mterf1b/Tefm/Top1mt/Tfb2m/Tfam/Mterf1a
COX	COX	mt-tRNA modifications	mt-tRNA modifications	21	-0.421643	-1.31357	0.119149	0.625532	0.625532	4822	tags=62%, list=33%, signal=41%	Mto1/Hsd17b10/Osgepl1/Nsun2/Nsun3/Trmt10c/Trmt1/Dus2/Trit1/Qtrt1/Trmt2b/Alkbh1/Trnt1
COX	COX	mtDNA maintainance	mtDNA maintainance	31	-0.379528	-1.30823	0.10917	0.625532	0.625532	749	tags=23%, list=5%, signal=21%	Apex1/Ppa2/Ssbp1/Tfb2m/Tfam/Pif1/Mterf1a
COX	COX	Mitochondrial central dogma	Mitochondrial central dogma	227	-0.239695	-1.19451	0.103015	0.625532	0.625532	3075	tags=26%, list=21%, signal=21%	Rmnd1/Trmt1/Mettl17/Polb/Vars2/Mrps22/Dus2/Trit1/Mrpl35/Mrps21/Qtrt1/Ybey/Top3a/Pdf/Mrps6/Mrpl51/Mrpl47/Mterf2/Mrpl24/Mrpl38/Mief1/Mrpl41/Mrps18c/Lactb2/Rars2/Mtrf1/Mrpl30/Mutyh/Trmt2b/Mrps36/Gfm2/Mrpl20/Mrpl33/Mrrf/Hemk1/Alkbh1/Trnt1/Mrpl50/Mrpl9/Fastkd3/Gatb/Myg1/Ptcd2/Ptcd3/Apex1/Tfb1m/Cars2/Dars2/Mrps9/Pnpt1/Ppa2/Ssbp1/Rbfa/Guf1/Mrpl34/Tfb2m/Mrpl18/Tfam/Pif1/Mterf1a
COX	COX	mtRNA metabolism	mtRNA metabolism	74	-0.287768	-1.216	0.153348	0.64406	0.64406	3727	tags=36%, list=26%, signal=27%	Nsun2/Ptcd1/Nsun3/Trmt10c/Top1mt/Rmnd1/Trmt1/Mettl17/Dus2/Trit1/Qtrt1/Ybey/Mrpl47/Lactb2/Trmt2b/Alkbh1/Trnt1/Fastkd3/Myg1/Ptcd2/Tfb1m/Mrps9/Pnpt1/Ppa2/Tfb2m/Tfam/Mterf1a
COX	COX	mtDNA nucleoid	mtDNA nucleoid	11	-0.476639	-1.22116	0.191919	0.654676	0.654676	480	tags=36%, list=3%, signal=35%	Mterf2/Ssbp1/Tfam/Mterf1a
COX	COX	Translation	Translation	153	-0.232433	-1.1044	0.218225	0.654676	0.654676	3075	tags=25%, list=21%, signal=20%	Rmnd1/Mettl17/Vars2/Mrps22/Mrpl35/Mrps21/Ybey/Pdf/Mrps6/Mrpl51/Mrpl47/Mrpl24/Mrpl38/Mief1/Mrpl41/Mrps18c/Rars2/Mtrf1/Mrpl30/Mrps36/Gfm2/Mrpl20/Mrpl33/Mrrf/Hemk1/Mrpl50/Mrpl9/Gatb/Ptcd3/Tfb1m/Cars2/Dars2/Mrps9/Ppa2/Rbfa/Guf1/Mrpl34/Mrpl18/Mterf1a
COX	COX	Mitochondrial ribosome	Mitochondrial ribosome	82	-0.259134	-1.11302	0.256696	0.673828	0.673828	4412	tags=51%, list=31%, signal=36%	Mrpl55/Mrps23/Mrpl22/Mrps31/Mrpl42/Mrps16/Mrps11/Aurkaip1/Mrps30/Mrpl3/Mrpl58/Mrps15/Mrpl44/Mrpl32/Mrps33/Mrps25/Mrpl13/Mrpl46/Mrps14/Mrpl40/Mrpl1/Mrpl36/Mrps22/Mrpl35/Mrps21/Mrps6/Mrpl51/Mrpl47/Mrpl24/Mrpl38/Mrpl41/Mrps18c/Mrpl30/Mrps36/Mrpl20/Mrpl33/Mrpl50/Mrpl9/Ptcd3/Mrps9/Mrpl34/Mrpl18
COX	COX	mtDNA modifications	mtDNA modifications	1	0.858392	1.13389	0.303644	0.684318	0.684318	2042	tags=100%, list=14%, signal=86%	Mettl4
COX	COX	mtDNA replication	mtDNA replication	14	-0.393351	-1.09826	0.325866	0.684318	0.684318	480	tags=43%, list=3%, signal=41%	Exog/Top1mt/Top3a/Ssbp1/Tfb2m/Tfam
COX	COX	mt-tRNA synthetases	mt-tRNA synthetases	22	0.330962	1.05702	0.372439	0.70122	0.70122	3282	tags=41%, list=23%, signal=32%	Mars2/Aars2/Sars2/Wars2/Yars2/Ears2/Qrsl1/Nars2/Tars2
COX	COX	Mitochondrial ribosome assembly	Mitochondrial ribosome assembly	24	-0.311249	-1.00489	0.460215	0.70122	0.70122	802	tags=29%, list=6%, signal=28%	Mettl17/Ybey/Mief1/Ptcd3/Tfb1m/Rbfa/Mterf1a
COX	COX	Translation factors	Translation factors	16	-0.343238	-0.992339	0.44	0.70122	0.70122	4572	tags=50%, list=32%, signal=34%	Mrpl58/Mtif2/Timm21/Mtrf1l/Mtrf1/Gfm2/Mrrf/Hemk1
COX	COX	mtDNA repair	mtDNA repair	9	0.402994	0.989715	0.46748	0.70122	0.70122	647	tags=22%, list=4%, signal=21%	Ung/Lig3
COX	COX	mtDNA stability and decay	mtDNA stability and decay	3	-0.595889	-0.987535	0.550936	0.77131	0.77131	4333	tags=100%, list=30%, signal=70%	Mgme1/Exog
COX	COX	mtRNA granules	mtRNA granules	27	0.268562	0.893656	0.643939	0.803758	0.803758	2234	tags=26%, list=15%, signal=22%	Noa1/Dhx30/Trub2/Mrm1/Grsf1/Rpusd3/Pus1
COX	COX	Polycistronic mtRNA processing	Polycistronic mtRNA processing	12	-0.331482	-0.873403	0.661943	0.803758	0.803758	5122	tags=58%, list=36%, signal=38%	Fastkd2/Fastkd5/Hsd17b10/Trmt10c/Ybey/Fastkd3/Ptcd2
COX	COX	mtRNA stability and decay	mtRNA stability and decay	17	-0.282343	-0.835096	0.688935	0.803758	0.803758	1947	tags=18%, list=14%, signal=15%	Lactb2/Fastkd3/Pnpt1
COX	COX	mt-mRNA modifications	mt-mRNA modifications	4	0.426498	0.795967	0.731801	0.808832	0.808832	1020	tags=25%, list=7%, signal=23%	Angel2
COX	COX	mt-rRNA modifications	mt-rRNA modifications	17	-0.25583	-0.756678	0.810021	0.850522	0.850522	3009	tags=29%, list=21%, signal=23%	Mettl17/Trit1/Trmt2b/Myg1/Tfb1m
COX	COX	fMet processing	fMet processing	3	-0.349125	-0.578586	0.939709	0.939709	0.939709	2495	tags=100%, list=17%, signal=83%	Mtfmt/Pdf
DKO	DKO	Mitochondrial central dogma	Mitochondrial central dogma	227	0.303742	1.53023	0.000320399	0.00672838	0.0053962	2306	tags=26%, list=16%, signal=23%	Ptcd3/Tfb2m/Mrpl9/Pif1/Mrpl50/Mrpl18/Ssbp1/Trmt5/Mrps9/Mterf1a/Alkbh1/Hsd17b10/Gfm2/Tfam/Fastkd3/Myg1/Pnpt1/Dars2/Mrps17/Mrpl33/Guf1/Fastkd2/Iars2/Ptcd2/Gtpbp10/Mrpl47/Dus2/Mrpl46/Rars2/Mettl17/Trmt10c/Hemk1/Mrpl49/Mrps6/Qtrt1/Mrpl1/Mtif2/Nsun3/Gatb/Ybey/Mtrf1/Mrpl24/Mrps22/Timm21/Mrpl35/Lactb2/Mrrf/Mrps23/Cars2/Mrpl30/Mettl5/Pdf/Cdk5rap1/Mtpap/Mrps31/Polq/Rmnd1/Mrps18b/Tefm/Exd2
DKO	DKO	mtRNA metabolism	mtRNA metabolism	74	0.398124	1.67644	0.00195511	0.0205286	0.0164641	3500	tags=46%, list=24%, signal=35%	Tfb2m/Trmt5/Mrps9/Mterf1a/Alkbh1/Hsd17b10/Tfam/Fastkd3/Myg1/Pnpt1/Fastkd2/Ptcd2/Mrpl47/Dus2/Mettl17/Trmt10c/Qtrt1/Nsun3/Ybey/Lactb2/Mettl5/Cdk5rap1/Mtpap/Rmnd1/Tefm/Tfb1m/Trub2/Mettl15/Lrpprc/Top1mt/Pde12/Trmt1/Trnt1/Mto1
DKO	DKO	Polycistronic mtRNA processing	Polycistronic mtRNA processing	12	0.627677	1.64545	0.0256984	0.109191	0.0875718	1730	tags=50%, list=12%, signal=44%	Hsd17b10/Fastkd3/Fastkd2/Ptcd2/Trmt10c/Ybey
DKO	DKO	mt-tRNA modifications	mt-tRNA modifications	21	0.487269	1.54179	0.0259979	0.109191	0.0875718	4451	tags=67%, list=30%, signal=47%	Trmt5/Alkbh1/Hsd17b10/Dus2/Trmt10c/Qtrt1/Nsun3/Cdk5rap1/Trmt1/Trnt1/Mto1/Nsun2/Trit1/Osgepl1
DKO	DKO	Translation	Translation	153	0.279512	1.32127	0.0206306	0.109191	0.0875718	2406	tags=26%, list=16%, signal=22%	Ptcd3/Mrpl9/Mrpl50/Mrpl18/Mrps9/Mterf1a/Gfm2/Dars2/Mrps17/Mrpl33/Guf1/Fastkd2/Iars2/Gtpbp10/Mrpl47/Mrpl46/Rars2/Mettl17/Hemk1/Mrpl49/Mrps6/Mrpl1/Mtif2/Gatb/Ybey/Mtrf1/Mrpl24/Mrps22/Timm21/Mrpl35/Mrrf/Mrps23/Cars2/Mrpl30/Pdf/Mrps31/Rmnd1/Mrps18b/Exd2/Mrpl51
DKO	DKO	Transcription	Transcription	8	0.582961	1.37582	0.133891	0.324627	0.260352	3044	tags=62%, list=21%, signal=50%	Tfb2m/Mterf1a/Tfam/Tefm/Top1mt
DKO	DKO	mtDNA replication	mtDNA replication	14	0.483583	1.32904	0.146552	0.324627	0.260352	545	tags=21%, list=4%, signal=21%	Tfb2m/Ssbp1/Tfam
DKO	DKO	Translation factors	Translation factors	16	0.447679	1.29496	0.152838	0.324627	0.260352	3300	tags=50%, list=22%, signal=39%	Gfm2/Hemk1/Mtif2/Mtrf1/Timm21/Mrrf/Mtrf1l/Mtif3
DKO	DKO	mtDNA repair	mtDNA repair	9	-0.544324	-1.29019	0.160853	0.324627	0.260352	1983	tags=22%, list=13%, signal=19%	Polg/Ung
DKO	DKO	mt-rRNA modifications	mt-rRNA modifications	17	0.429822	1.2654	0.171875	0.324627	0.260352	2765	tags=41%, list=19%, signal=33%	Myg1/Mettl17/Mettl5/Mtpap/Tfb1m/Trub2/Mettl15
DKO	DKO	mtDNA maintainance	mtDNA maintainance	31	0.358808	1.26185	0.151386	0.324627	0.260352	545	tags=16%, list=4%, signal=16%	Tfb2m/Pif1/Ssbp1/Mterf1a/Tfam
DKO	DKO	mtDNA nucleoid	mtDNA nucleoid	11	0.489019	1.26184	0.185501	0.324627	0.260352	545	tags=27%, list=4%, signal=26%	Ssbp1/Mterf1a/Tfam
DKO	DKO	mtRNA stability and decay	mtRNA stability and decay	17	0.40382	1.18885	0.238839	0.334375	0.26817	3081	tags=41%, list=21%, signal=33%	Fastkd3/Pnpt1/Fastkd2/Lactb2/Mtpap/Lrpprc/Pde12
DKO	DKO	mtRNA granules	mtRNA granules	27	0.34975	1.18144	0.225877	0.334375	0.26817	2764	tags=41%, list=19%, signal=33%	Mrps9/Alkbh1/Hsd17b10/Fastkd2/Ptcd2/Mrpl47/Trmt10c/Mtpap/Rmnd1/Tfb1m/Trub2
DKO	DKO	Mitochondrial ribosome	Mitochondrial ribosome	82	0.267261	1.14829	0.21	0.334375	0.26817	4119	tags=39%, list=28%, signal=28%	Ptcd3/Mrpl9/Mrpl50/Mrpl18/Mrps9/Mrps17/Mrpl33/Mrpl47/Mrpl46/Mrpl49/Mrps6/Mrpl1/Mrpl24/Mrps22/Mrpl35/Mrps23/Mrpl30/Mrps31/Mrps18b/Mrpl51/Mrpl22/Mrpl21/Mrps18c/Mrps36/Mrpl41/Mrps14/Mrpl38/Mrps16/Mrpl34/Mrpl32/Mrpl20/Mrpl42
DKO	DKO	fMet processing	fMet processing	3	0.645911	1.11077	0.397872	0.483801	0.388011	5212	tags=100%, list=35%, signal=65%	Pdf/Mtfmt/Metap1d
DKO	DKO	mt-mRNA modifications	mt-mRNA modifications	4	0.563071	1.06285	0.414687	0.483801	0.388011	3081	tags=75%, list=21%, signal=59%	Myg1/Mtpap/Pde12
DKO	DKO	Mitochondrial ribosome assembly	Mitochondrial ribosome assembly	24	0.324468	1.05546	0.372549	0.483801	0.388011	1730	tags=25%, list=12%, signal=22%	Ptcd3/Mterf1a/Fastkd2/Gtpbp10/Mettl17/Ybey
DKO	DKO	mtDNA modifications	mtDNA modifications	1	0.718548	0.956308	0.570328	0.610105	0.489307	4142	tags=100%, list=28%, signal=72%	Mettl4
DKO	DKO	mt-tRNA synthetases	mt-tRNA synthetases	22	0.290113	0.934028	0.581053	0.610105	0.489307	1919	tags=23%, list=13%, signal=20%	Dars2/Iars2/Rars2/Gatb/Cars2
DKO	DKO	mtDNA stability and decay	mtDNA stability and decay	3	-0.447564	-0.783265	0.740602	0.740602	0.593966	2220	tags=100%, list=15%, signal=85%	Exog/Endog

## Sheet: metab
Cluster	group	ID	Description	setSize	enrichmentScore	NES	pvalue	p.adjust	qvalue	rank	leading_edge	core_enrichment
COX	COX	Nucleotide synthesis and processing	Nucleotide synthesis and processing	21	-0.621585	-1.96242	0.000638983	0.0431795	0.042381	3800	tags=67%, list=26%, signal=49%	Nme4/Cmpk2/Sucla2/Dguok/Nudt2/Dut/Ak4/Fhit/Tk2/Nt5dc2/Ak3/Ak2/Paics/Suclg1
COX	COX	Glycolysis	Glycolysis	16	-0.658685	-1.91692	0.00116701	0.0431795	0.042381	1188	tags=56%, list=8%, signal=52%	Eno1b/Pfkl/Gpi1/Pfkp/Aldoa/Tpi1/Eno1/Pkm/Pgk1
COX	COX	Nucleotide metabolism	Nucleotide metabolism	31	-0.520656	-1.80569	0.00179549	0.0442887	0.0434697	3800	tags=52%, list=26%, signal=38%	Nme4/Cmpk2/Sucla2/Dguok/Nudt2/Dut/Ak4/Fhit/Slc25a23/Tk2/Nt5dc2/Ppa2/Ak3/Ak2/Paics/Suclg1
COX	COX	Glycerol phosphate shuttle	Glycerol phosphate shuttle	1	0.9966	1.32625	0.00419633	0.077632	0.0761964	50	tags=100%, list=0%, signal=100%	Gpd2
COX	COX	Serine metabolism	Serine metabolism	3	0.871317	1.51079	0.0259988	0.384783	0.377667	571	tags=67%, list=4%, signal=64%	Sfxn3/Shmt2
COX	COX	Heme-containing proteins	Heme-containing proteins	9	-0.594079	-1.46131	0.0754717	0.721951	0.708601	854	tags=33%, list=6%, signal=31%	Cyb5b/Sdhd/mt-Cytb
COX	COX	Proline metabolism	Proline metabolism	6	0.66946	1.43924	0.104418	0.721951	0.708601	1081	tags=50%, list=7%, signal=46%	Prodh/Pycr2/Aldh4a1
COX	COX	Copper metabolism	Copper metabolism	6	0.661288	1.42167	0.114458	0.721951	0.708601	2940	tags=67%, list=20%, signal=53%	Chchd7/Cox17/Cox11/Slc25a3
COX	COX	Itaconate metabolism	Itaconate metabolism	6	-0.654685	-1.40284	0.105159	0.721951	0.708601	177	tags=67%, list=1%, signal=66%	Sucla2/Clybl/Suclg1/Auh
COX	COX	Molybdenum cofactor synthesis and proteins	Molybdenum cofactor synthesis and proteins	3	0.808019	1.40104	0.0873984	0.721951	0.708601	382	tags=33%, list=3%, signal=32%	Suox
COX	COX	Coenzyme Q metabolism	Coenzyme Q metabolism	13	0.503405	1.36921	0.134146	0.721951	0.708601	3069	tags=46%, list=21%, signal=36%	Coq8b/Coq2/Coq5/Coq10b/Coq3/Coq10a
COX	COX	Heme synthesis and processing	Heme synthesis and processing	13	0.494579	1.34521	0.146341	0.721951	0.708601	4458	tags=46%, list=31%, signal=32%	Fech/Fdx1/Alas1/Cox15/Cpox/Fdxr
COX	COX	Folate and 1-C metabolism	Folate and 1-C metabolism	21	0.424614	1.30362	0.14425	0.721951	0.708601	2557	tags=33%, list=18%, signal=27%	Mthfd1l/Sfxn3/Shmt2/Fpgs/Gtpbp3/Chdh/Mthfsl
COX	COX	Metals and cofactors	Metals and cofactors	108	0.276345	1.18829	0.145133	0.721951	0.708601	4008	tags=38%, list=28%, signal=28%	Pank2/Iba57/Suox/Fech/Fth1/Naxe/Naxd/Aco2/Coq8b/Coq2/Fdx1/Chchd7/Alas1/Coq5/Cpt1c/Cox17/Cox11/Spr/Coq10b/Rsad1/Iscu/Nmnat3/Dna2/Cyc1/Fxn/Nfu1/Slc25a3/Coq3/Coq10a/Sirt4/Nfs1/Ndufs7/Cisd1/Sdhc/Slc25a42/Coasy/Cox15/Glrx2/Glrx5/Ndufs8/mt-Co1
COX	COX	Metabolism	Metabolism	403	0.23021	1.17386	0.068038	0.721951	0.708601	3577	tags=30%, list=25%, signal=23%	Glud1/Ogdh/Fasn/Gpd2/Bckdk/Pank2/Gldc/Acot7/Iba57/Suox/Mthfd1l/Sfxn3/Ldhd/Zadh2/Prps2/Shmt2/Fech/Fth1/Mdh2/Prodh/Txnrd1/Aldh1b1/Naxe/Pccb/Naxd/Pycr2/Aco2/Rfk/Plscr3/Coq8b/Txnrd2/Acsf3/Sdha/Aldh4a1/Acadl/Pdpr/Slc25a11/Acot2/Idi1/Aldh2/Pdp1/Acsl6/Coq2/Hadha/Lipt2/Acaca/Eci1/Abhd10/L2hgdh/Fdx1/Akr7a5/Dlat/Acly/Taz/Chchd7/Dcxr/Maoa/Mccc2/Alas1/Gpam/Fpgs/Coq5/Bdh1/Cpt1c/Gtpbp3/Cox17/Cox11/Spr/Coq10b/R…
COX	COX	Cytochromes	Cytochromes	4	-0.687509	-1.30007	0.173228	0.756716	0.742722	854	tags=75%, list=6%, signal=71%	Cycs/Cyb5b/mt-Cytb
COX	COX	Iron homeostasis	Iron homeostasis	4	0.673561	1.27252	0.202429	0.756716	0.742722	599	tags=25%, list=4%, signal=24%	Fth1
COX	COX	GABA metabolism	GABA metabolism	5	0.624127	1.27212	0.208163	0.756716	0.742722	1659	tags=40%, list=12%, signal=35%	Glud1/Akr7a5
COX	COX	Lysine metabolism	Lysine metabolism	13	-0.464722	-1.26916	0.184314	0.756716	0.742722	3732	tags=54%, list=26%, signal=40%	Dld/Etfa/Hadhb/Acat1/Etfdh/Etfb/Acaa2
COX	COX	Propanoate metabolism	Propanoate metabolism	3	0.712325	1.23511	0.229675	0.756716	0.742722	840	tags=33%, list=6%, signal=31%	Pccb
COX	COX	Xenobiotic metabolism	Xenobiotic metabolism	13	0.453016	1.23216	0.203252	0.756716	0.742722	1764	tags=38%, list=12%, signal=34%	Aldh1b1/Aldh2/Abhd10/Akr7a5/Maoa
COX	COX	Vitamin B2 metabolism	Vitamin B2 metabolism	3	0.700472	1.21456	0.245935	0.756716	0.742722	971	tags=33%, list=7%, signal=31%	Rfk
COX	COX	Eicosanoid metabolism	Eicosanoid metabolism	3	0.692388	1.20054	0.256098	0.756716	0.742722	4436	tags=100%, list=31%, signal=69%	Zadh2/Ptges2/Mgst3
COX	COX	Choline and betaine metabolism	Choline and betaine metabolism	6	-0.558262	-1.19622	0.265873	0.756716	0.742722	3413	tags=67%, list=24%, signal=51%	Etfa/Sardh/Etfdh/Etfb
COX	COX	Branched-chain amino acid dehydrogenase complex	Branched-chain amino acid dehydrogenase complex	6	0.556052	1.19543	0.25502	0.756716	0.742722	85	tags=17%, list=1%, signal=17%	Bckdk
COX	COX	Carbohydrate metabolism	Carbohydrate metabolism	419	0.209334	1.07113	0.23622	0.756716	0.742722	3462	tags=28%, list=24%, signal=22%	Glud1/Ogdh/Fasn/Gpd2/Bckdk/Pank2/Gldc/Acot7/Iba57/Suox/Mthfd1l/Sfxn3/Ldhd/Zadh2/Prps2/Shmt2/Fech/Fth1/Mdh2/Prodh/Txnrd1/Aldh1b1/Naxe/Pccb/Naxd/Pycr2/Aco2/Rfk/Plscr3/Coq8b/Txnrd2/Acsf3/Sdha/Aldh4a1/Acadl/Pdpr/Slc25a11/Acot2/Idi1/Aldh2/Pdp1/Acsl6/Coq2/Hadha/Lipt2/Acaca/Eci1/Abhd10/L2hgdh/Fdx1/Akr7a5/Dlat/Acly/Taz/Chchd7/Dcxr/Maoa/Mccc2/Alas1/Gpam/Fpgs/Coq5/Bdh1/Cpt1c/Gtpbp3/Cox17/Cox11/Spr/Coq10b/R…
COX	COX	Amidoxime reducing complex	Amidoxime reducing complex	2	-0.743162	-1.16219	0.295938	0.798944	0.78417	854	tags=100%, list=6%, signal=94%	Cyb5b
COX	COX	Selenoproteins	Selenoproteins	5	0.558007	1.13735	0.312245	0.798944	0.78417	1024	tags=40%, list=7%, signal=37%	Txnrd1/Txnrd2
COX	COX	Vitamin D metabolism	Vitamin D metabolism	3	0.65146	1.12958	0.343496	0.798944	0.78417	4458	tags=67%, list=31%, signal=46%	Fdx1/Fdxr
COX	COX	Gluconeogenesis	Gluconeogenesis	8	0.460741	1.09202	0.337398	0.798944	0.78417	4127	tags=62%, list=29%, signal=45%	Mdh2/Slc25a11/Slc25a10/Mpc2/Slc25a1
COX	COX	Vitamin metabolism	Vitamin metabolism	46	0.293952	1.07984	0.324955	0.798944	0.78417	2566	tags=24%, list=18%, signal=20%	Mthfd1l/Sfxn3/Shmt2/Rfk/Acaca/Fdx1/Fpgs/Gtpbp3/Chdh/Mthfsl/Mmadhc
COX	COX	Fe-S-containing proteins	Fe-S-containing proteins	29	0.323751	1.06121	0.345489	0.798944	0.78417	3929	tags=45%, list=27%, signal=33%	Fech/Aco2/Fdx1/Rsad1/Iscu/Dna2/Nfu1/Nfs1/Ndufs7/Cisd1/Glrx2/Glrx5/Ndufs8
COX	COX	Detoxification	Detoxification	39	0.29814	1.05141	0.372973	0.836364	0.820897	2432	tags=23%, list=17%, signal=19%	Txnrd1/Aldh1b1/Txnrd2/Aldh2/Abhd10/Akr7a5/Maoa/Aldh3a2/Prdx6
COX	COX	Vitamin A metabolism	Vitamin A metabolism	4	-0.559797	-1.05857	0.427165	0.850076	0.834356	5040	tags=75%, list=35%, signal=49%	Dhrs4/Rdh13/Akr1b10
COX	COX	Type II fatty acid synthesis	Type II fatty acid synthesis	7	-0.46501	-1.03117	0.426829	0.850076	0.834356	567	tags=57%, list=4%, signal=55%	Ndufab1/Mecr/Mcat/Cbr4
COX	COX	Q-linked reactions, other	Q-linked reactions, other	10	0.404086	1.02162	0.410638	0.850076	0.834356	736	tags=20%, list=5%, signal=19%	Gpd2/Prodh
COX	COX	Malate-aspartate shuttle	Malate-aspartate shuttle	6	0.471154	1.01291	0.429719	0.850076	0.834356	2882	tags=50%, list=20%, signal=40%	Mdh2/Slc25a11/Slc25a10
COX	COX	Fatty acid oxidation	Fatty acid oxidation	40	-0.269591	-1.00086	0.436526	0.850076	0.834356	3413	tags=35%, list=24%, signal=27%	Etfa/Acacb/Acadm/Hadhb/Eci2/Acat1/Acsf2/Etfdh/Slc25a20/Etfb/Acss1/Crot/Decr1/Acaa2
COX	COX	Urea cycle	Urea cycle	3	0.586011	1.01609	0.485772	0.851123	0.835383	5969	tags=100%, list=41%, signal=59%	Slc25a15/Car5b/Slc25a13
COX	COX	Glycine cleavage system	Glycine cleavage system	4	0.536655	1.01387	0.449393	0.851123	0.835383	227	tags=25%, list=2%, signal=25%	Gldc
COX	COX	TCA cycle	TCA cycle	20	0.325503	0.990412	0.461101	0.851123	0.835383	1069	tags=20%, list=7%, signal=19%	Ogdh/Mdh2/Aco2/Sdha
COX	COX	Glutamate metabolism	Glutamate metabolism	6	-0.452552	-0.969713	0.503968	0.851123	0.835383	1468	tags=50%, list=10%, signal=45%	Gls2/Slc25a12/Gpt2
COX	COX	Glycine metabolism	Glycine metabolism	13	-0.351444	-0.959798	0.498039	0.851123	0.835383	3732	tags=54%, list=26%, signal=40%	Dld/Etfa/Sardh/Amt/Etfdh/Etfb/Gcat
COX	COX	Coenzyme A metabolism	Coenzyme A metabolism	4	0.507751	0.959264	0.506073	0.851123	0.835383	3559	tags=75%, list=25%, signal=56%	Pank2/Slc25a42/Coasy
COX	COX	Fe-S cluster biosynthesis	Fe-S cluster biosynthesis	22	0.303182	0.932683	0.549323	0.903331	0.886627	3847	tags=36%, list=27%, signal=27%	Iba57/Fdx1/Iscu/Fxn/Nfu1/Nfs1/Cisd1/Glrx5
COX	COX	Amino acid metabolism	Amino acid metabolism	68	0.232888	0.920134	0.597884	0.932341	0.9151	2598	tags=24%, list=18%, signal=19%	Glud1/Bckdk/Gldc/Sfxn3/Shmt2/Prodh/Pycr2/Aldh4a1/Hadha/Akr7a5/Maoa/Mccc2/Hibadh/Ldhb/Chdh/Dglucy
COX	COX	TCA-associated	TCA-associated	13	0.329595	0.896467	0.587398	0.932341	0.9151	4127	tags=46%, list=29%, signal=33%	Slc25a11/L2hgdh/Acly/Abhd11/Mpc2/Slc25a1
COX	COX	Lipid metabolism	Lipid metabolism	107	0.206321	0.884036	0.722913	0.932341	0.9151	1904	tags=17%, list=13%, signal=15%	Fasn/Acot7/Zadh2/Pccb/Plscr3/Acsf3/Acadl/Acot2/Idi1/Acsl6/Hadha/Lipt2/Acaca/Eci1/Fdx1/Taz/Gpam/Cpt1c
COX	COX	Vitamin C metabolism	Vitamin C metabolism	2	0.560585	0.863532	0.698969	0.932341	0.9151	3831	tags=50%, list=27%, signal=37%	Glrx2
COX	COX	Vitamin B1 metabolism	Vitamin B1 metabolism	1	0.647818	0.8621	0.727651	0.932341	0.9151	5077	tags=100%, list=35%, signal=65%	Slc25a19
COX	COX	Electron carriers	Electron carriers	14	-0.307311	-0.858082	0.635271	0.932341	0.9151	3635	tags=50%, list=25%, signal=37%	Cycs/Etfa/Etfrf1/Etfdh/Etfb/Cyb5b/mt-Cytb
COX	COX	Vitamin B6 metabolism	Vitamin B6 metabolism	2	0.55655	0.857317	0.701031	0.932341	0.9151	6393	tags=100%, list=44%, signal=56%	Plpbp/Pnpo
COX	COX	Catechol metabolism	Catechol metabolism	2	0.553803	0.853086	0.707216	0.932341	0.9151	1764	tags=50%, list=12%, signal=44%	Maoa
COX	COX	Vitamin B12 metabolism	Vitamin B12 metabolism	3	0.490733	0.850888	0.672764	0.932341	0.9151	2566	tags=33%, list=18%, signal=27%	Mmadhc
COX	COX	Glyoxylate metabolism	Glyoxylate metabolism	4	0.447979	0.84634	0.649798	0.932341	0.9151	2378	tags=50%, list=16%, signal=42%	Aldh4a1/Ldhb
COX	COX	Nucleotide import	Nucleotide import	7	0.354114	0.808405	0.707843	0.932341	0.9151	3226	tags=43%, list=22%, signal=33%	Slc25a24/Slc25a25/Slc25a33
COX	COX	ROS and glutathione metabolism	ROS and glutathione metabolism	24	0.254421	0.805234	0.751434	0.932341	0.9151	4449	tags=33%, list=31%, signal=23%	Txnrd1/Txnrd2/Aldh3a2/Prdx6/Gsr/Glrx2/Hagh/Gpx1
COX	COX	Lipoate insertion	Lipoate insertion	4	0.420317	0.79408	0.724696	0.932341	0.9151	1519	tags=25%, list=11%, signal=22%	Lipt2
COX	COX	Sulfur metabolism	Sulfur metabolism	11	0.301401	0.789067	0.739496	0.932341	0.9151	382	tags=9%, list=3%, signal=9%	Suox
COX	COX	Ketone metabolism	Ketone metabolism	6	-0.365962	-0.78417	0.755952	0.932341	0.9151	3232	tags=50%, list=22%, signal=39%	Hadhb/Acat1/Acaa2
COX	COX	Cholesterol-associated	Cholesterol-associated	2	0.504768	0.777552	0.779381	0.945479	0.927995	1236	tags=50%, list=9%, signal=46%	Idi1
COX	COX	Phospholipid metabolism	Phospholipid metabolism	23	-0.238756	-0.772414	0.811861	0.952575	0.934959	1909	tags=22%, list=13%, signal=19%	Gpat2/Agpat5/Prelid1/Pgs1/Sptlc2
COX	COX	Pyruvate metabolism	Pyruvate metabolism	13	0.269778	0.733772	0.825203	0.952575	0.934959	3577	tags=46%, list=25%, signal=35%	Pdpr/Pdp1/Dlat/Pdhx/Pdha1/Mpc2
COX	COX	Branched-chain amino acid metabolism	Branched-chain amino acid metabolism	25	-0.224414	-0.732934	0.88535	0.952575	0.934959	3788	tags=40%, list=26%, signal=30%	Ppm1k/Dld/Bckdha/Etfa/Acat1/Hibch/Etfdh/Etfb/Aldh6a1/Auh
COX	COX	Cardiolipin synthesis	Cardiolipin synthesis	16	0.250944	0.721084	0.837573	0.952575	0.934959	1855	tags=25%, list=13%, signal=22%	Plscr3/Hadha/Taz/Gpam
COX	COX	Creatine metabolism	Creatine metabolism	2	0.443936	0.683844	0.861856	0.952575	0.934959	8016	tags=100%, list=56%, signal=44%	Ckmt1/Gatm
COX	COX	NAD biosynthesis and metabolism	NAD biosynthesis and metabolism	13	0.250862	0.68232	0.888211	0.952575	0.934959	847	tags=15%, list=6%, signal=14%	Naxe/Naxd
COX	COX	Tetrahydobiopterin synthesis	Tetrahydobiopterin synthesis	3	0.377065	0.653799	0.880081	0.952575	0.934959	2115	tags=33%, list=15%, signal=28%	Spr
COX	COX	Kynurenine metabolism	Kynurenine metabolism	3	-0.375546	-0.646994	0.862745	0.952575	0.934959	9003	tags=67%, list=62%, signal=25%	Got2/Kyat3
COX	COX	Pentose-Phosphate Shunt	Pentose-Phosphate Shunt	13	0.230189	0.626092	0.928862	0.970922	0.952968	3373	tags=31%, list=23%, signal=24%	Prps2/Pgls/Prps1/Rpia
COX	COX	Cholesterol, bile acid, steroid synthesis	Cholesterol, bile acid, steroid synthesis	10	0.238962	0.60415	0.944681	0.970922	0.952968	5006	tags=50%, list=35%, signal=33%	Fdx1/Osbpl1a/Fdxr/Cyp11a1/Dhrs1
COX	COX	Biotin utilizing proteins	Biotin utilizing proteins	5	0.282849	0.576513	0.940816	0.970922	0.952968	3219	tags=40%, list=22%, signal=31%	Acaca/Mccc1
COX	COX	Carnitine shuttle	Carnitine shuttle	5	-0.249525	-0.507679	0.972656	0.98598	0.967747	4054	tags=60%, list=28%, signal=43%	Cpt1b/Cpt1a/Slc25a20
COX	COX	Carnitine synthesis and transport	Carnitine synthesis and transport	6	-0.195986	-0.419951	1	1	0.981508	4054	tags=33%, list=28%, signal=24%	Cpt1a/Slc25a20
DKO	DKO	Carbohydrate metabolism	Carbohydrate metabolism	419	-0.274521	-1.37294	0.00226356	0.167503	0.164406	3604	tags=31%, list=24%, signal=24%	Abhd11/Pisd/Prps2/Glrx5/Acadvl/Foxk2/Ech1/Mthfsl/Cpt1c/Sfxn3/Iscu/Acad10/Taldo1/Slc25a19/Echdc1/Gldc/Prodh/Qdpr/Sdhc/Mocs1/Pdp1/Hint1/Sdha/Hibadh/Sphk2/Aldh1l1/Ndufs7/Cox10/Gcdh/Pdpr/Acaca/Gtpbp3/Dcxr/Nmnat3/Cpox/Osbpl1a/Sqor/Ptpmt1/Mpc2/Aldh9a1/Aldh7a1/Mpst/Ethe1/Aldh3a2/Cat/Stard7/Txnrd1/Fdps/Got2/Slc25a29/Tspo/Mgst3/Cox11/Slc25a10/Pgls/Acsf2/Acot7/Rfk/Fpgs/Rdh14/Coasy/Hagh/Acaa1a/Pdp2/D2hgdh/G…
DKO	DKO	Metabolism	Metabolism	403	-0.268653	-1.33558	0.00586075	0.216848	0.212838	3604	tags=31%, list=24%, signal=24%	Abhd11/Pisd/Prps2/Glrx5/Acadvl/Ech1/Mthfsl/Cpt1c/Sfxn3/Iscu/Acad10/Taldo1/Slc25a19/Echdc1/Gldc/Prodh/Qdpr/Sdhc/Mocs1/Pdp1/Hint1/Sdha/Hibadh/Sphk2/Aldh1l1/Ndufs7/Cox10/Gcdh/Pdpr/Acaca/Gtpbp3/Dcxr/Nmnat3/Cpox/Osbpl1a/Sqor/Ptpmt1/Mpc2/Aldh9a1/Aldh7a1/Mpst/Ethe1/Aldh3a2/Cat/Stard7/Txnrd1/Fdps/Got2/Slc25a29/Tspo/Mgst3/Cox11/Slc25a10/Pgls/Acsf2/Acot7/Rfk/Fpgs/Rdh14/Coasy/Hagh/Acaa1a/Pdp2/D2hgdh/Gpd2/Md…
DKO	DKO	Gluconeogenesis	Gluconeogenesis	8	-0.727339	-1.70029	0.0127584	0.314708	0.308889	2640	tags=62%, list=18%, signal=51%	Mpc2/Slc25a10/Mdh2/Slc25a11/Slc25a1
DKO	DKO	TCA-associated	TCA-associated	13	-0.612747	-1.64544	0.0276044	0.427772	0.419862	2640	tags=54%, list=18%, signal=44%	Pcx/Abhd11/Mpc2/D2hgdh/Acly/Slc25a11/Slc25a1
DKO	DKO	Lipid metabolism	Lipid metabolism	107	-0.32755	-1.38874	0.0289035	0.427772	0.419862	3685	tags=35%, list=25%, signal=26%	Acad12/Acsl1/Hadha/Pisd/Acadvl/Ech1/Cpt1c/Acad10/Echdc1/Sphk2/Acaca/Osbpl1a/Ptpmt1/Stard7/Fdps/Tspo/Mgst3/Acsf2/Acot7/Acaa1a/Lipt2/Amacr/Mlycd/Cyb5r3/Lactb/Pccb/Acads/Fdx1/Acot2/Acadl/Idi1/Zadh2/Eci1/Plscr3/Acsf3/Slc25a1/Fasn
DKO	DKO	Glycolysis	Glycolysis	16	-0.529774	-1.49024	0.0699962	0.575524	0.564881	1019	tags=31%, list=7%, signal=29%	Foxk1/Pfkl/Hk1/Eno2/Eno3
DKO	DKO	Xenobiotic metabolism	Xenobiotic metabolism	13	-0.546167	-1.46665	0.0516252	0.575524	0.564881	2485	tags=38%, list=17%, signal=32%	Mpst/Aldh1b1/Aldh2/Cyb5r3/Akr7a5
DKO	DKO	Detoxification	Detoxification	39	-0.415485	-1.44733	0.057554	0.575524	0.564881	2565	tags=33%, list=17%, signal=28%	Aldh9a1/Aldh7a1/Mpst/Aldh3a2/Cat/Txnrd1/Hagh/Aldh1b1/Txnrd2/Gsr/Aldh2/Cyb5r3/Akr7a5
DKO	DKO	Eicosanoid metabolism	Eicosanoid metabolism	3	-0.810276	-1.40673	0.0671937	0.575524	0.564881	2173	tags=100%, list=15%, signal=85%	Mgst3/Zadh2
DKO	DKO	Heme synthesis and processing	Heme synthesis and processing	13	-0.507646	-1.36321	0.114723	0.777082	0.762712	799	tags=46%, list=5%, signal=44%	Cox10/Cpox/Alas1/Abcb10/Fdx1/Fech
DKO	DKO	Tetrahydobiopterin synthesis	Tetrahydobiopterin synthesis	3	-0.764978	-1.32809	0.142292	0.777082	0.762712	3224	tags=100%, list=22%, signal=78%	Qdpr/Spr
DKO	DKO	GABA metabolism	GABA metabolism	5	-0.658466	-1.32798	0.148297	0.777082	0.762712	575	tags=60%, list=4%, signal=58%	Aldh9a1/Akr7a5/Glud1
DKO	DKO	Vitamin D metabolism	Vitamin D metabolism	3	-0.743699	-1.29115	0.175889	0.777082	0.762712	578	tags=100%, list=4%, signal=96%	Fdxr/Fdx1
DKO	DKO	Cholesterol-associated	Cholesterol-associated	2	-0.84516	-1.27862	0.138716	0.777082	0.762712	2281	tags=100%, list=16%, signal=85%	Idi1
DKO	DKO	Iron homeostasis	Iron homeostasis	4	-0.683489	-1.27815	0.180698	0.777082	0.762712	24	tags=50%, list=0%, signal=50%	Slc25a28/Fth1
DKO	DKO	Selenoproteins	Selenoproteins	5	-0.629907	-1.27038	0.196393	0.777082	0.762712	4846	tags=80%, list=33%, signal=54%	Selenoo/Gpx1/Txnrd1/Txnrd2
DKO	DKO	Pentose-Phosphate Shunt	Pentose-Phosphate Shunt	13	-0.465088	-1.24893	0.198853	0.777082	0.762712	4065	tags=54%, list=28%, signal=39%	Pgd/Prps2/Taldo1/Pgls/Rpia/H6pd/Tkt
DKO	DKO	Coenzyme Q metabolism	Coenzyme Q metabolism	13	-0.464109	-1.2463	0.202677	0.777082	0.762712	1290	tags=31%, list=9%, signal=28%	Coq8a/Coq8b/Coq2/Coq10a
DKO	DKO	Malate-aspartate shuttle	Malate-aspartate shuttle	6	-0.577845	-1.22901	0.229862	0.777082	0.762712	2251	tags=67%, list=15%, signal=56%	Got2/Slc25a10/Mdh2/Slc25a11
DKO	DKO	Copper metabolism	Copper metabolism	6	-0.574109	-1.22106	0.237721	0.777082	0.762712	6271	tags=100%, list=43%, signal=57%	Slc25a3/Cox19/Cox17/Cox11/Chchd7
DKO	DKO	Glycerol phosphate shuttle	Glycerol phosphate shuttle	1	-0.878815	-1.17707	0.231884	0.777082	0.762712	1785	tags=100%, list=12%, signal=88%
DKO	DKO	Nucleotide synthesis and processing	Nucleotide synthesis and processing	21	0.364914	1.15665	0.241525	0.777082	0.762712	1735	tags=24%, list=12%, signal=21%	Paics/Ak3/Nudt5/Suclg1/Sucla2
DKO	DKO	Metals and cofactors	Metals and cofactors	108	-0.269501	-1.14126	0.216612	0.777082	0.762712	1742	tags=19%, list=12%, signal=16%	Chchd7/Suox/Spr/Sirt4/Kmo/Coq8a/Cyc1/Coq8b/Naxe/Coq2/Coq10a/Alas1/Naxd/Abcb10/Fdx1/Fxn/Fech/Iba57/Pank2/Fth1
DKO	DKO	Sulfur metabolism	Sulfur metabolism	11	-0.467275	-1.18653	0.262136	0.808252	0.793306	2662	tags=45%, list=18%, signal=37%	Sqor/Mpst/Ethe1/Got2/Suox
DKO	DKO	ROS and glutathione metabolism	ROS and glutathione metabolism	24	-0.371435	-1.16172	0.273063	0.808266	0.793319	2565	tags=33%, list=17%, signal=28%	Aldh9a1/Aldh7a1/Aldh3a2/Cat/Txnrd1/Hagh/Txnrd2/Gsr
DKO	DKO	Cytochromes	Cytochromes	4	0.632399	1.18799	0.306796	0.828624	0.813301	5	tags=25%, list=0%, signal=25%	mt-Cytb
DKO	DKO	NAD biosynthesis and metabolism	NAD biosynthesis and metabolism	13	-0.42375	-1.13792	0.315488	0.828624	0.813301	1337	tags=38%, list=9%, signal=35%	Nmnat3/Sirt4/Kmo/Naxe/Naxd
DKO	DKO	Nucleotide metabolism	Nucleotide metabolism	31	0.318172	1.10726	0.302174	0.828624	0.813301	4510	tags=39%, list=31%, signal=27%	Paics/Ak3/Nudt5/Suclg1/Sucla2/Nudt2/Slc25a5/Nme6/Ak2/Ppa2/Dhodh/Slc25a4
DKO	DKO	Branched-chain amino acid metabolism	Branched-chain amino acid metabolism	25	0.335951	1.09775	0.324731	0.828624	0.813301	3862	tags=40%, list=26%, signal=30%	Hsd17b10/Dbt/Hibch/Dld/Ppm1k/Acat1/Acad8/Etfdh/Auh/Etfb
DKO	DKO	Heme-containing proteins	Heme-containing proteins	9	0.460389	1.09809	0.348643	0.859986	0.844083	5	tags=11%, list=0%, signal=11%	mt-Cytb
DKO	DKO	Glyoxylate metabolism	Glyoxylate metabolism	4	-0.601689	-1.12518	0.361396	0.862688	0.846735	2251	tags=75%, list=15%, signal=64%	Grhpr/Got2/Aldh4a1
DKO	DKO	Amidoxime reducing complex	Amidoxime reducing complex	2	-0.7277	-1.10092	0.395445	0.914467	0.897556	983	tags=100%, list=7%, signal=93%	Cyb5r3
DKO	DKO	Vitamin B1 metabolism	Vitamin B1 metabolism	1	-0.773534	-1.03606	0.436853	0.964974	0.947129	3334	tags=100%, list=23%, signal=77%
DKO	DKO	Branched-chain amino acid dehydrogenase complex	Branched-chain amino acid dehydrogenase complex	6	0.460455	0.971036	0.521298	0.964974	0.947129	3015	tags=50%, list=20%, signal=40%	Dbt/Dld/Ppm1k
DKO	DKO	Vitamin B12 metabolism	Vitamin B12 metabolism	3	-0.557522	-0.967923	0.563241	0.964974	0.947129	1686	tags=67%, list=11%, signal=59%	Mmadhc/Mmab
DKO	DKO	Vitamin B2 metabolism	Vitamin B2 metabolism	3	0.564249	0.967535	0.550403	0.964974	0.947129	200	tags=33%, list=1%, signal=33%	Slc25a32
DKO	DKO	Catechol metabolism	Catechol metabolism	2	0.629282	0.967429	0.572254	0.964974	0.947129	5456	tags=100%, list=37%, signal=63%	Comt/Maoa
DKO	DKO	TCA cycle	TCA cycle	20	0.311977	0.961311	0.509719	0.964974	0.947129	3301	tags=45%, list=22%, signal=35%	Idh3b/Suclg1/Idh3a/Dld/Sucla2/Sdhb/Sdhd/Ogdhl/Mrps36
DKO	DKO	Fe-S cluster biosynthesis	Fe-S cluster biosynthesis	22	-0.302753	-0.931782	0.566176	0.964974	0.947129	578	tags=14%, list=4%, signal=13%	Fdx1/Fxn/Iba57
DKO	DKO	Electron carriers	Electron carriers	14	0.333389	0.929628	0.513514	0.964974	0.947129	5	tags=7%, list=0%, signal=7%	mt-Cytb
DKO	DKO	Folate and 1-C metabolism	Folate and 1-C metabolism	21	-0.302633	-0.913454	0.575472	0.964974	0.947129	3461	tags=43%, list=24%, signal=33%	Mthfsl/Sfxn3/Qdpr/Aldh1l1/Gtpbp3/Aldh7a1/Fpgs/Mthfd1l/Shmt2
DKO	DKO	Vitamin metabolism	Vitamin metabolism	46	-0.251254	-0.913167	0.589965	0.964974	0.947129	3461	tags=33%, list=24%, signal=25%	Mthfsl/Sfxn3/Slc25a19/Qdpr/Aldh1l1/Acaca/Gtpbp3/Aldh7a1/Rfk/Fpgs/Rdh14/Mmab/Mthfd1l/Fdx1/Shmt2
DKO	DKO	Coenzyme A metabolism	Coenzyme A metabolism	4	-0.485769	-0.908408	0.613963	0.964974	0.947129	2028	tags=75%, list=14%, signal=65%	Slc25a42/Coasy/Pank2
DKO	DKO	Kynurenine metabolism	Kynurenine metabolism	3	-0.516346	-0.896435	0.62253	0.964974	0.947129	2251	tags=67%, list=15%, signal=56%	Got2/Kmo
DKO	DKO	Amino acid metabolism	Amino acid metabolism	68	0.213107	0.892722	0.702517	0.964974	0.947129	3586	tags=34%, list=24%, signal=26%	Oat/Hsd17b10/Gpt2/Dbt/Hibch/Slc25a12/Gls/Aldh18a1/Dld/Kyat3/Gcat/Sfxn1/Acaa2/Abat/Comt/Ppm1k/Acat1/Hadhb/Acad8/Aldh5a1/Gcsh/Etfdh/Auh
DKO	DKO	Propanoate metabolism	Propanoate metabolism	3	-0.510056	-0.885516	0.63834	0.964974	0.947129	762	tags=67%, list=5%, signal=63%	Mcee/Pccb
DKO	DKO	Glycine cleavage system	Glycine cleavage system	4	0.466013	0.875425	0.629126	0.964974	0.947129	3408	tags=50%, list=23%, signal=38%	Dld/Gcsh
DKO	DKO	Creatine metabolism	Creatine metabolism	2	0.565797	0.869829	0.695568	0.964974	0.947129	6390	tags=100%, list=43%, signal=57%	Gatm/Ckmt1
DKO	DKO	Fatty acid oxidation	Fatty acid oxidation	40	-0.2479	-0.868079	0.698214	0.964974	0.947129	4302	tags=38%, list=29%, signal=27%	Acot11/Etfa/Acad12/Acsl1/Hadha/Acadvl/Cpt1c/Acad10/Acsf2/Acaa1a/Amacr/Pccb/Acads/Acadl/Eci1
DKO	DKO	Glutamate metabolism	Glutamate metabolism	6	0.40899	0.862503	0.64503	0.964974	0.947129	909	tags=50%, list=6%, signal=47%	Gpt2/Slc25a12/Gls
DKO	DKO	Serine metabolism	Serine metabolism	3	-0.491042	-0.852506	0.66996	0.964974	0.947129	519	tags=67%, list=4%, signal=64%	Sfxn3/Shmt2
DKO	DKO	Vitamin B6 metabolism	Vitamin B6 metabolism	2	0.548769	0.843652	0.73025	0.964974	0.947129	1715	tags=50%, list=12%, signal=44%	Plpbp
DKO	DKO	Proline metabolism	Proline metabolism	6	0.38715	0.816447	0.693712	0.964974	0.947129	1065	tags=33%, list=7%, signal=31%	Oat/Aldh18a1
DKO	DKO	Biotin utilizing proteins	Biotin utilizing proteins	5	0.401263	0.811368	0.705765	0.964974	0.947129	2662	tags=40%, list=18%, signal=33%	Pcca/Acacb
DKO	DKO	Cardiolipin synthesis	Cardiolipin synthesis	16	0.27737	0.800732	0.728238	0.964974	0.947129	681	tags=12%, list=5%, signal=12%	Agpat5/Triap1
DKO	DKO	Lysine metabolism	Lysine metabolism	13	0.291651	0.793717	0.713987	0.964974	0.947129	3862	tags=46%, list=26%, signal=34%	Dld/Acaa2/Acat1/Hadhb/Etfdh/Etfb
DKO	DKO	Ketone metabolism	Ketone metabolism	6	-0.354645	-0.754289	0.791749	0.987526	0.969265	1415	tags=33%, list=10%, signal=30%	Hmgcl/Bdh1
DKO	DKO	Cholesterol, bile acid, steroid synthesis	Cholesterol, bile acid, steroid synthesis	10	-0.301009	-0.747253	0.814042	0.987526	0.969265	2683	tags=30%, list=18%, signal=25%	Osbpl1a/Tspo/Fdx1
DKO	DKO	Molybdenum cofactor synthesis and proteins	Molybdenum cofactor synthesis and proteins	3	0.431348	0.739646	0.804435	0.987526	0.969265	487	tags=33%, list=3%, signal=32%	Abcb7
DKO	DKO	Itaconate metabolism	Itaconate metabolism	6	0.33982	0.716633	0.807302	0.987526	0.969265	1735	tags=33%, list=12%, signal=29%	Suclg1/Sucla2
DKO	DKO	Nucleotide import	Nucleotide import	7	0.326096	0.715352	0.799582	0.987526	0.969265	4510	tags=29%, list=31%, signal=20%	Slc25a5/Slc25a4
DKO	DKO	Q-linked reactions, other	Q-linked reactions, other	10	-0.282119	-0.700358	0.840607	0.99044	0.972124	5053	tags=50%, list=34%, signal=33%	Etfbkmt/Etfa/Prodh/Sqor/Gpd2
DKO	DKO	Vitamin A metabolism	Vitamin A metabolism	4	-0.371835	-0.695347	0.843943	0.99044	0.972124	2042	tags=75%, list=14%, signal=65%	Akr1b10/Dhrs4/Rdh14
DKO	DKO	Type II fatty acid synthesis	Type II fatty acid synthesis	7	-0.311034	-0.692729	0.856597	0.99044	0.972124	283	tags=29%, list=2%, signal=28%	Acaca/Acsf3
DKO	DKO	Pyruvate metabolism	Pyruvate metabolism	13	0.251033	0.683176	0.872651	0.99348	0.975108	1681	tags=23%, list=11%, signal=20%	Dld/Pdhb/Pdha1
DKO	DKO	Phospholipid metabolism	Phospholipid metabolism	23	0.197973	0.636433	0.95186	0.994036	0.975654	1632	tags=13%, list=11%, signal=12%	Agpat5/Triap1/Prelid3b
DKO	DKO	Lipoate insertion	Lipoate insertion	4	-0.338309	-0.632652	0.889117	0.994036	0.975654	1439	tags=50%, list=10%, signal=45%	Lipt1/Lipt2
DKO	DKO	Urea cycle	Urea cycle	3	0.35103	0.601922	0.943548	0.994036	0.975654	9550	tags=100%, list=65%, signal=35%	Slc25a13/Car5b/Slc25a15
DKO	DKO	Fe-S-containing proteins	Fe-S-containing proteins	29	0.1754	0.596052	0.97561	0.994036	0.975654	2968	tags=21%, list=20%, signal=17%	Ndufs1/Isca1/Sdhb/Lias/Abat/Nthl1
DKO	DKO	Vitamin C metabolism	Vitamin C metabolism	2	-0.392061	-0.59314	0.937888	0.994036	0.975654	8947	tags=100%, list=61%, signal=39%	Glrx2
DKO	DKO	Glycine metabolism	Glycine metabolism	13	0.204475	0.556469	0.958246	0.994036	0.975654	3862	tags=38%, list=26%, signal=28%	Dld/Gcat/Gcsh/Etfdh/Etfb
DKO	DKO	Choline and betaine metabolism	Choline and betaine metabolism	6	-0.235586	-0.501064	0.992141	0.994036	0.975654	11250	tags=50%, list=76%, signal=12%	Sardh/Etfa/Aldh7a1
DKO	DKO	Carnitine synthesis and transport	Carnitine synthesis and transport	6	0.23411	0.493706	0.991886	0.994036	0.975654	5302	tags=50%, list=36%, signal=32%	Slc25a20/Tmlhe/Cpt1b
DKO	DKO	Carnitine shuttle	Carnitine shuttle	5	0.233055	0.471245	0.994036	0.994036	0.975654	11286	tags=100%, list=77%, signal=23%	Slc25a20/Cpt1b/Cpt2/Cpt1a/Cpt1c
