# Supplementary material for: Cytochrome c oxidase dependent respiration is essential for T cell activation, proliferation and memory formation
Source: Nat Commun. 2025 Dec 4;16:10898. doi: 10.1038/s41467-025-65910-w (PMC12678437; doi:10.1038/s41467-025-65910-w)
Supplement: Supplementary file 6 — Supplementary Data 4 [file 41467_2025_65910_MOESM6_ESM.xlsx]

## Sheet: Aox_vs_WT
gene_name	baseMean	log2FoldChange	lfcSE	stat	pvalue	padj
Eef1a1	188758	0.0886699	0.0714926	1.24027	0.214877	0.595631
mt-Co1	168916	-0.192007	0.103266	-1.85934	0.0629789	0.354358
Eef2	98404.4	-0.0357959	0.0474378	-0.754586	0.450497	0.778821
Hsp90ab1	89481	-0.026426	0.0540838	-0.488612	0.625116	0.872916
mt-Nd1	84079.1	-0.256451	0.108758	-2.358	0.0183738	0.193316
Hspa8	79017.4	0.00330453	0.0493086	0.0670174	0.946568	0.987073
Rpsa	79140.5	0.0323551	0.0710415	0.45544	0.648793	0.881825
Actb	78913.6	0.0586246	0.0675094	0.868392	0.38518	0.739338
Rplp0	73058.2	0.0345929	0.0462155	0.748512	0.454152	0.781468
Npm1	67982.1	-0.0386808	0.101067	-0.382724	0.701924	0.903103
Ncl	66936.3	-0.0180214	0.0784839	-0.229619	0.818388	0.944043
Rpl4	65372.4	-0.00390175	0.0607774	-0.0641973	0.948813	0.987663
Ldha	53079.3	0.148986	0.0772414	1.92884	0.0537508	0.326679
mt-Cytb	51165.3	-0.108372	0.103219	-1.04993	0.29375	0.668651
Tubb5	49968.7	-0.00373414	0.0654842	-0.0570235	0.954526	0.989588
Pkm	47467.9	0.138378	0.087561	1.58037	0.114023	0.46746
Rpl7	45849.7	0.00727391	0.107785	0.0674854	0.946195	0.987073
Rps2	45979	-0.0260751	0.0544619	-0.478777	0.632097	0.87614
Hsp90aa1	44961.6	-0.0553552	0.0730415	-0.75786	0.448535	0.777597
Rps4x	44549.3	0.0101836	0.0872661	0.116695	0.907101	0.976051
Rplp1	45417.8	0.0357345	0.11378	0.314067	0.75347	0.924107
Ptma	43945.1	-0.121778	0.0720143	-1.69103	0.0908307	0.419189
Rack1	43129.9	0.0217853	0.0718319	0.303282	0.761675	0.927612
Rpl3	42934.2	0.0956921	0.0435169	2.19897	0.0278804	0.236637
Pabpc1	41421.3	-0.226516	0.0371962	-6.08977	1.13074e-09	6.85849e-06
Rps3a1	41836.3	0.0631809	0.103566	0.610052	0.541828	0.832028
Ppia	40770.1	-0.0806369	0.105265	-0.766038	0.443654	0.77444
Tpt1	39946.6	-0.204216	0.100275	-2.03655	0.0416955	0.288228
Rpl5	40035.2	-0.0234687	0.105151	-0.223191	0.823387	0.946028
Eno1	40537.6	0.272749	0.144787	1.88379	0.0595938	0.344444
Rpl13	40082	0.0536453	0.0786088	0.682434	0.494965	0.80672
Rpl41	39420.2	-0.0303036	0.117357	-0.258217	0.79624	0.938423
Rps3	37887.8	-0.0467109	0.116698	-0.400271	0.688957	0.898295
Eif5a	36665.4	-0.0263331	0.0524754	-0.501818	0.615795	0.866413
Rpl6	36836.3	0.118599	0.0520038	2.28059	0.0225726	0.215478
mt-Nd2	34199.8	-0.239334	0.0856683	-2.79373	0.00521043	0.102846
Tmsb4x	34409	-0.155285	0.124393	-1.24834	0.211905	0.592987
mt-Nd5	32615.5	-0.345426	0.0900542	-3.83575	0.000125181	0.0108469
Actg1	32672.6	-0.145334	0.0871352	-1.66792	0.0953322	0.4271
Hspd1	32845.5	-0.0125275	0.0737597	-0.169843	0.865134	0.959757
Rpl8	33420.2	0.035303	0.0567323	0.622273	0.533762	0.828855
Rpl12	32800	-0.114994	0.115622	-0.99457	0.319945	0.69123
Rps18	32829.1	0.051422	0.129967	0.395654	0.69236	0.899572
Rps26	31321.2	-0.0994697	0.11101	-0.89604	0.370231	0.728512
Rpl10	31587.6	0.0723651	0.0651187	1.11128	0.266448	0.64594
Rps6	31095.1	-0.0585839	0.0660924	-0.886395	0.375405	0.732541
Rps24	31414	-0.0213136	0.110324	-0.19319	0.84681	0.95453
Rps5	30374.3	0.0910812	0.0958246	0.9505	0.341858	0.708144
Eif4g2	29376.7	-0.00549041	0.053314	-0.102983	0.917977	0.976849
Eif4a1	29865.6	0.0413354	0.0644595	0.641261	0.521353	0.820622
Rps8	29162.3	0.148157	0.0625806	2.36745	0.0179109	0.190508
Atp5b	28847.9	-0.0451059	0.0393844	-1.14527	0.252096	0.631984
Serbp1	29118.8	-0.0861681	0.0634887	-1.35722	0.174712	0.553012
Tuba1b	28933.3	-0.0397957	0.0434701	-0.915471	0.359944	0.720423
Rps14	29132.3	-0.11918	0.148641	-0.801799	0.422669	0.763492
Hnrnpu	28548.3	-0.0878147	0.0525998	-1.66949	0.0950206	0.426872
Eef1g	28564.6	-0.0808299	0.0457873	-1.76534	0.0775074	0.391278
Rpl18a	28313.5	0.0348254	0.116433	0.299102	0.764862	0.928348
Hnrnpa2b1	27868.2	0.0824449	0.0618644	1.33267	0.18264	0.561766
Hnrnpa1	27971.5	0.123236	0.0901436	1.36711	0.171591	0.549911
Ybx1	27283.4	-0.191386	0.0511287	-3.74322	0.000181679	0.0146184
Rpl10a	27135.4	0.106469	0.0761732	1.39773	0.162195	0.538605
Cfl1	25539.2	-0.0274211	0.0618848	-0.4431	0.657693	0.886143
Aldoa	25933.6	0.231864	0.103504	2.24014	0.0250818	0.225383
Rpl27a	25383.3	0.101019	0.0797115	1.26731	0.205045	0.586599
Gzmb	24249.9	0.348047	0.363122	0.958484	0.337819	0.705865
B2m	24508.3	0.16248	0.0872701	1.86181	0.0626305	0.353382
Rps9	24800	-0.00159925	0.0577343	-0.0277001	0.977901	0.995839
Ptprc	23204.2	-0.19109	0.09688	-1.97244	0.04856	0.312068
Set	23772.8	-0.0684296	0.0567387	-1.20605	0.2278	0.608284
Pgk1	24089.7	0.354998	0.112728	3.14916	0.00163739	0.054078
Rps25	23555	-0.170439	0.129652	-1.31459	0.188647	0.568991
Rpl18	23590.4	0.160851	0.0740305	2.17277	0.0297976	0.244902
Rps20	23523.6	0.0609491	0.0780889	0.780509	0.435091	0.769087
mt-Rnr2	22314.5	-0.424864	0.135748	-3.12979	0.00174929	0.0564248
Rps7	23001.5	-0.181046	0.190374	-0.951004	0.341602	0.70813
Rpl14	22845.2	0.0665607	0.0589573	1.12897	0.258912	0.638777
Lcp1	22306.1	-0.0923326	0.0549291	-1.68094	0.0927743	0.422519
Rpl32	22800.9	0.0130154	0.0730251	0.178231	0.858541	0.958105
mt-Nd4	22104.4	-0.0611438	0.101553	-0.602085	0.547118	0.83601
Cnbp	21986.1	-0.0382418	0.079818	-0.479113	0.631858	0.876087
Tfrc	21832.3	-0.119975	0.106972	-1.12156	0.26205	0.641521
Ran	22240.4	0.0710601	0.0595804	1.19268	0.232996	0.614185
Atp5a1	21704.2	-0.0851623	0.0462529	-1.84123	0.0655874	0.362314
Ddx5	21266.1	0.0100782	0.0506009	0.199171	0.842129	0.953018
Rpl26	20888.4	-0.114598	0.134728	-0.850585	0.395	0.745766
Rps16	21071.8	0.149414	0.0840737	1.77717	0.0755395	0.384545
Rps23	20658.2	0.115034	0.0934364	1.23114	0.218269	0.598295
Pfn1	20610.7	-0.097614	0.0493906	-1.97637	0.0481132	0.310293
Kpnb1	19441	-0.0712217	0.0662905	-1.07439	0.282649	0.659082
Slc25a5	19519.2	-0.0601411	0.0593503	-1.01332	0.310906	0.682166
Rpl19	19701.2	-0.108005	0.0709271	-1.52276	0.127819	0.488984
Rps27a	19181.7	-0.0892351	0.359706	-0.248078	0.804074	0.940438
Rps12	18800.8	0.0144859	0.110866	0.130661	0.896044	0.972437
Top2a	18949.5	0.0296283	0.0920564	0.321849	0.747567	0.922336
Rpl34	19645.6	-0.17764	0.162756	-1.09145	0.275075	0.655329
Eef1b2	19304.1	0.00937014	0.0658755	0.14224	0.88689	0.969482
Rpl11	19497.1	0.0609456	0.114801	0.53088	0.595502	0.858314
Eif4g1	18686.2	-0.1234	0.0706074	-1.74769	0.0805184	0.397319
Irf4	18349.8	0.0682934	0.103872	0.657479	0.510873	0.814911
Hnrnpab	18585.8	-0.245192	0.0771624	-3.17761	0.00148492	0.0508857
Mybbp1a	18003.7	-0.109803	0.0624092	-1.7594	0.07851	0.393332
Hspa9	18001.5	0.0640996	0.0621551	1.03128	0.302408	0.677221
Mif	18478.4	0.0923945	0.0555882	1.66212	0.0964882	0.429156
Nap1l1	17665.3	-0.110641	0.0530989	-2.08368	0.0371891	0.274083
Rpl15	18140.8	-0.0956142	0.10116	-0.945178	0.344568	0.70979
Rps15	18376.8	0.0530053	0.0791879	0.669362	0.503265	0.810821
Odc1	17226.2	-0.064759	0.0633872	-1.02164	0.306951	0.680627
Rpl9	17803.7	0.0346306	0.0716375	0.483414	0.628802	0.873897
Rps17	17832.3	-0.0274367	0.117583	-0.233339	0.815498	0.94316
Tpi1	18181.5	0.289526	0.126529	2.28822	0.0221249	0.213862
Pcna	17459.2	-0.114218	0.0981986	-1.16313	0.244777	0.62553
Hspa5	17282.8	0.162169	0.0565955	2.8654	0.00416481	0.0898662
Rpl31	17459.9	-0.121566	0.145925	-0.833071	0.404805	0.753353
Hnrnpk	17139.3	0.0573142	0.059916	0.956575	0.338782	0.706578
Rps15a	17210.8	-0.0640531	0.124257	-0.515489	0.606211	0.861988
Rps19	17204.8	0.0115374	0.0844447	0.136626	0.891326	0.970695
Scd2	16981.9	0.0799782	0.139025	0.57528	0.565102	0.844243
Eif3a	16079.4	0.0121333	0.076516	0.158572	0.874006	0.963674
Rpl37a	16420.9	0.043255	0.106743	0.405227	0.685311	0.896625
Ddx21	15847.9	-0.012394	0.0800322	-0.154863	0.87693	0.964988
Coro1a	16174.8	-0.139725	0.0844139	-1.65523	0.097877	0.431291
Rplp2	16065.7	-0.0961306	0.0894293	-1.07493	0.282404	0.659071
Eif4b	15717.3	-0.0598872	0.046301	-1.29343	0.195861	0.576697
Rpl28	16205.2	0.111112	0.0565243	1.96573	0.0493298	0.314182
Ipo5	15399	0.0280161	0.0539886	0.518926	0.603812	0.860835
Eif3c	15381.4	0.0704221	0.072822	0.967043	0.333522	0.702969
Cct8	15086.3	0.0417014	0.0512487	0.813706	0.415813	0.758873
Rps13	15361.1	0.00516739	0.0684981	0.0754384	0.939866	0.984157
Rps11	15237.7	-0.0279117	0.0695368	-0.401395	0.68813	0.898061
Naca	14663.6	0.0149164	0.0882831	0.168961	0.865827	0.959865
Myh9	14417.4	-0.327062	0.0955381	-3.42337	0.000618504	0.0311331
Rpl27	14584	0.0731923	0.0953737	0.767426	0.442828	0.77444
Cct2	14415.8	0.0844436	0.0568171	1.48624	0.137216	0.503653
Srrm2	14359.2	-0.151273	0.0794737	-1.90343	0.0569847	0.335551
Calm1	14237.4	-0.0411643	0.0621767	-0.662053	0.507937	0.813363
G3bp1	14324.8	-0.0878885	0.0613041	-1.43365	0.151673	0.525343
Rcc2	14376.8	-0.236576	0.0520224	-4.54758	5.42658e-06	0.00140064
Rpl29	13856.3	-0.157902	0.0840039	-1.8797	0.0601492	0.346143
Cct5	14097.1	0.0984147	0.0445129	2.21093	0.027041	0.232488
Srsf1	13948.9	-0.157424	0.0493837	-3.18778	0.00143371	0.0501221
Ddx3x	13726.8	-0.161822	0.0697815	-2.31899	0.0203957	0.204432
Tcp1	13806.8	0.0742871	0.0535684	1.38677	0.165512	0.543003
Actr3	13859.5	-0.0322182	0.0497562	-0.647521	0.517295	0.817949
Tpm3	13810.6	-0.0409348	0.049528	-0.826499	0.408521	0.75536
Ccnd2	13785.1	0.0596773	0.108338	0.550845	0.58174	0.85258
Pa2g4	13796.1	-0.117427	0.053314	-2.20255	0.0276266	0.236013
Rpl23	13963.7	0.0548733	0.103007	0.532715	0.594231	0.857862
Ptbp1	13637.6	-0.0991246	0.0533788	-1.857	0.0633107	0.35589
Gbp2	14088.7	0.116509	0.130538	0.892534	0.372107	0.729953
Fasn	13440.9	-0.398088	0.0882342	-4.51172	6.43029e-06	0.00156012
Hmgb2	13557	-0.15252	0.0974199	-1.5656	0.117443	0.474678
Srsf3	13457.5	-0.0129556	0.0887094	-0.146045	0.883885	0.96835
Caprin1	13334	0.0108999	0.0447191	0.243741	0.807431	0.94126
Mki67	13090.9	-0.100216	0.0993678	-1.00854	0.313196	0.684819
Gm23935	14549.6	0.501241	0.388156	1.29134	0.196586	0.577711
Calr	13209.7	-0.057041	0.071796	-0.794487	0.426912	0.765283
H3f3b	13075.7	0.0718891	0.0653611	1.09988	0.271386	0.651659
Nop56	13132.1	-0.0871085	0.0769054	-1.13267	0.257353	0.638044
Prpf8	12889.6	-0.0940027	0.0919533	-1.02229	0.306645	0.680627
Slc25a3	13003.6	-0.0761495	0.0628911	-1.21082	0.225966	0.606325
Rpl36	13485.3	-0.0160622	0.103459	-0.155252	0.876623	0.964826
Cct7	13105.1	0.121421	0.0472156	2.57162	0.0101224	0.147317
Fau	13054.8	0.0872274	0.0640289	1.36231	0.173099	0.551001
Cct6a	12664.1	0.0659036	0.0658077	1.00146	0.316606	0.687689
Anp32b	13147.7	-0.0703371	0.0681006	-1.03284	0.301678	0.676382
Arhgdia	13035	-0.0889863	0.0536482	-1.6587	0.0971761	0.430193
Il2ra	12746.6	0.33757	0.196003	1.72228	0.0850197	0.40671
Shmt2	12838	-0.101126	0.0635681	-1.59083	0.111648	0.46195
Hnrnpf	12624.3	-0.0269482	0.0589146	-0.457412	0.647375	0.881508
Bzw1	12270.8	-0.0431392	0.0602299	-0.716243	0.473842	0.792536
Ubb	12648.2	0.0716131	0.0552861	1.29532	0.195211	0.576397
Hnrnpa0	12628.4	-0.17233	0.0761989	-2.26159	0.023723	0.220767
Rps27	12628.4	-0.0687129	0.147101	-0.467112	0.640419	0.879136
Hnrnpl	12335.5	-0.129506	0.035704	-3.62721	0.000286505	0.0189923
Rpl35	12347.5	-0.0993187	0.139281	-0.71308	0.475797	0.793461
Cct4	11993.8	0.0711381	0.0432833	1.64355	0.10027	0.436289
mt-Nd6	11514.1	-0.142634	0.0957196	-1.49013	0.136191	0.501272
Cct3	12025.6	0.138169	0.0529054	2.61163	0.0090113	0.139487
Nfkb1	11651	-0.0445468	0.0766223	-0.581382	0.560983	0.842938
Rrm1	11737.9	-0.086586	0.0667576	-1.29702	0.194624	0.575839
Ssrp1	11914.4	-0.0684086	0.051586	-1.32611	0.184804	0.564453
Eif3b	11968.8	-0.0771813	0.0596805	-1.29324	0.195927	0.576752
Hnrnph1	11789.4	0.0386713	0.0674499	0.573334	0.566419	0.844754
Btf3	11896.5	0.00644822	0.0661945	0.0974132	0.922398	0.978028
Mcm6	11890.4	-0.072197	0.0582176	-1.24012	0.214929	0.595631
Uba1	11757.1	0.00697132	0.0666416	0.104609	0.916686	0.976849
Ybx3	11692.6	-0.160416	0.0736471	-2.17817	0.0293935	0.2429
Tardbp	11558.9	0.00597214	0.0644989	0.0925929	0.926227	0.978666
Atp1a1	11471.7	-0.296126	0.0998218	-2.96655	0.00301166	0.0756406
Rpl23a	12109.1	-0.127762	0.129375	-0.987538	0.323379	0.694237
Mcm3	11585.9	-0.0458853	0.0578407	-0.793305	0.4276	0.765283
Dnmt1	11456.6	-0.233357	0.0793883	-2.93944	0.00328808	0.0796162
Canx	11468.8	0.0227435	0.0681877	0.333543	0.738725	0.918531
H2afz	11507.8	-0.0287485	0.110368	-0.26048	0.794494	0.937945
Chd4	11271.8	-0.16381	0.0816244	-2.00688	0.0447628	0.298689
Ddb1	11162.4	-0.0412266	0.0681412	-0.605017	0.545168	0.834121
mt-Rnr1	11129.6	-0.424236	0.308014	-1.37732	0.168412	0.545092
Tkt	11257.2	-0.0603175	0.0466009	-1.29434	0.195548	0.576695
Etf1	10981.1	-0.0513241	0.0550248	-0.932746	0.350951	0.713848
Ywhaz	10931.2	0.0315459	0.0649928	0.485376	0.62741	0.873733
Rpl22	10833.5	-0.15278	0.158061	-0.966586	0.333751	0.703066
Ywhae	10779.3	-0.0329793	0.0585106	-0.563647	0.572994	0.848925
Phgdh	11097.5	0.081052	0.0620491	1.30626	0.191466	0.572515
Pcbp1	11032.2	-0.158395	0.0676031	-2.34302	0.0191284	0.19765
Msn	10769.2	0.0374622	0.0672624	0.556957	0.577557	0.850571
Son	10561.8	0.0709468	0.0639298	1.10976	0.267102	0.64657
Rbm3	10796.3	-0.144041	0.133347	-1.0802	0.280054	0.656998
Eif4a2	10522.2	0.00177332	0.0693293	0.0255782	0.979594	0.996208
Sf3b1	10523.2	0.0652217	0.0448809	1.45322	0.146163	0.518625
Mbnl1	10047.6	-0.184381	0.0699289	-2.63669	0.00837196	0.134339
Hnrnpm	10738.9	0.0984789	0.0512544	1.92138	0.0546843	0.328789
Larp1	10653.4	-0.190043	0.0752981	-2.52388	0.0116067	0.159277
Psat1	10652.6	0.2088	0.0698986	2.98718	0.00281563	0.0726732
Eif5	10269.7	-0.144517	0.0589963	-2.4496	0.0143015	0.175192
Actr2	10406	0.0616723	0.0595852	1.03503	0.300656	0.675895
AI506816	10415.5	-0.272421	0.0704197	-3.86853	0.000109492	0.0100624
Hspa4	10423	-0.0798941	0.0459801	-1.73758	0.0822849	0.402337
Nono	10495.2	0.0925179	0.0623431	1.48401	0.137806	0.504594
Hsp90b1	10302.1	0.0537685	0.0708927	0.758449	0.448182	0.77737
Cad	10198	-0.469545	0.0941615	-4.98659	6.14547e-07	0.000355003
Rpl36a	10465.8	-0.270865	0.210386	-1.28747	0.197932	0.578938
Xpo1	10036.1	-0.156937	0.066069	-2.37534	0.0175327	0.18883
Prdx1	10218.9	-0.113642	0.120882	-0.940105	0.347164	0.711017
Sfpq	10233.2	-0.177204	0.0632128	-2.80329	0.00505844	0.100551
Ly6a	10500.4	0.482897	0.131559	3.67058	0.000242001	0.0168719
Prrc2a	10208.3	-0.397067	0.0819927	-4.84271	1.28078e-06	0.00059573
Nolc1	10172.3	-0.0395381	0.0840799	-0.470244	0.63818	0.878647
Hdgf	10223.4	-0.0108902	0.0642828	-0.169411	0.865473	0.959865
Snx5	9851.73	-0.130554	0.0510669	-2.55653	0.0105722	0.151076
Rps29	10508.7	0.164855	0.120867	1.36393	0.172589	0.550498
Nop58	9873.45	-0.120558	0.0664665	-1.81381	0.0697064	0.373536
Pdia3	9848.07	-0.114891	0.0484675	-2.37047	0.0177655	0.189599
Tmsb10	10329.5	-0.125883	0.0977164	-1.28825	0.19766	0.578938
Sf3b3	9750.07	0.0279303	0.0773109	0.361273	0.717896	0.909344
Dhx9	9668.37	-0.0865734	0.0600811	-1.44094	0.149601	0.522849
Tfdp1	9636.08	-0.161826	0.0525281	-3.08076	0.00206475	0.0603318
Rpl39	9873.96	-0.0586669	0.13735	-0.427134	0.669282	0.890638
Eprs	9739.08	0.0791684	0.0811949	0.975043	0.329539	0.699473
Mcm5	9811.82	-0.059175	0.0516009	-1.14678	0.251472	0.631397
Cdv3	9689.65	-0.0105956	0.0618255	-0.17138	0.863925	0.9596
Eif1	9538.22	-0.0265661	0.0792557	-0.335194	0.737478	0.918256
Uhrf1	9687.54	-0.114306	0.0738709	-1.54738	0.121771	0.480409
Hnrnpc	9666.63	0.118955	0.0540292	2.20168	0.0276877	0.236369
Vars	9754.48	-0.293023	0.0619828	-4.72749	2.27307e-06	0.000840198
Mcm7	9704.35	-0.0306773	0.0539114	-0.569031	0.569335	0.846809
Smc4	9383.05	-0.0743156	0.0722618	-1.02842	0.303752	0.677809
Pfkp	9795.68	0.37398	0.125979	2.96858	0.00299184	0.0756125
Hspe1	9420.86	0.00445492	0.0967697	0.0460363	0.963281	0.991201
Rpl37	9534.61	0.0751492	0.104345	0.720199	0.471402	0.79155
Srsf2	9316.24	-0.200953	0.0480606	-4.18124	2.8992e-05	0.00428905
CT010467.1	9891.45	-0.0816117	0.26104	-0.31264	0.754554	0.92434
Trim28	9445.56	-0.159456	0.0585126	-2.72515	0.00642713	0.115005
Rpl30	9512.19	-0.192277	0.500186	-0.384411	0.700674	0.902707
Slc1a5	9544.1	0.038596	0.0562542	0.6861	0.49265	0.80511
Ipo7	9228.83	-0.0441417	0.0561457	-0.786198	0.431751	0.767748
P4hb	9432.98	0.11579	0.0700849	1.65214	0.0985055	0.432647
Ube2d3	9198.8	-0.023993	0.0358534	-0.669195	0.503371	0.810834
Srsf6	9114.82	-0.147485	0.0750583	-1.96494	0.0494207	0.314182
Eif3e	9078.06	-0.285144	0.144502	-1.97329	0.0484624	0.312048
Sept7	8947.79	-0.246233	0.11489	-2.1432	0.0320968	0.256331
Pabpc4	9233.13	-0.20287	0.0653512	-3.10431	0.00190727	0.0584269
Anapc5	9127.25	-0.00205381	0.047506	-0.0432327	0.965516	0.991615
Rpl17	9250.41	0.194572	0.373682	0.52069	0.602583	0.8606
Nsun2	8980.06	-0.0188603	0.0412197	-0.457557	0.647271	0.881508
Agfg1	8769.76	-0.0555209	0.0852201	-0.6515	0.514724	0.816769
Gpi1	9206.34	0.224607	0.0940239	2.38883	0.0169021	0.184887
Abce1	8763.37	-0.074476	0.0593765	-1.2543	0.209733	0.590317
Eif2s2	8932.55	0.0758459	0.0988614	0.767195	0.442966	0.77444
Rps21	9120.9	0.187715	0.142623	1.31616	0.188119	0.568726
Vcp	8890.81	-0.0585754	0.0756039	-0.774767	0.438477	0.771789
Rap1b	8625.69	-0.145749	0.0489043	-2.98029	0.00287973	0.0737005
Slfn2	8918.24	-0.0131147	0.129662	-0.101146	0.919435	0.976849
Itgal	8566.9	-0.281021	0.122303	-2.29775	0.0215762	0.210742
Huwe1	8588.73	-0.134486	0.0806922	-1.66666	0.0955824	0.427226
Rsl1d1	8644.02	0.0267349	0.0650824	0.410785	0.68123	0.895089
Hdlbp	8645.74	0.0343507	0.0891673	0.385239	0.70006	0.902488
Rbm39	8548.36	0.00501325	0.0529467	0.0946848	0.924565	0.978405
Cd53	8499.65	-0.0270162	0.107544	-0.251211	0.801651	0.939234
Paics	8580.71	0.0644575	0.0529856	1.21651	0.223791	0.60329
Irf8	8495.72	-0.121335	0.128475	-0.944426	0.344952	0.709801
Mat2a	8405.05	0.00203589	0.0597781	0.0340574	0.972831	0.994722
Gars	8541.45	0.176674	0.0594468	2.97197	0.00295895	0.0750066
Kpna2	8208.8	-0.0440606	0.0968666	-0.454859	0.649211	0.881825
Psme3	8239	-0.280002	0.0608181	-4.60392	4.14606e-06	0.0011441
Fkbp4	8481.65	0.0660323	0.0569099	1.1603	0.245928	0.62636
Tmpo	8217.49	-0.0946542	0.0389602	-2.42951	0.0151192	0.176538
Syncrip	8141.81	-0.074934	0.0596965	-1.25525	0.209388	0.590168
Cdc42	8156.83	0.0415361	0.0618934	0.671091	0.502162	0.810683
Psmd2	8261.89	0.0901336	0.0548042	1.64465	0.100042	0.43596
Pgam1	8343.21	0.0127148	0.0949811	0.133866	0.893508	0.971626
Acly	8281.01	-0.0168106	0.0639567	-0.262843	0.792671	0.937714
Ddx39b	8296.32	-0.000526376	0.0503425	-0.0104559	0.991658	0.998799
Rpl35a	8324.01	-0.0378463	0.135759	-0.278776	0.780417	0.93354
Stip1	8283.14	-0.0358227	0.0545526	-0.656664	0.511397	0.815214
Rac2	8102.75	0.0492653	0.0682695	0.72163	0.470522	0.79155
Shisa5	8321.43	0.266931	0.0739458	3.60982	0.000306413	0.0196672
Eif4h	8192.34	-0.117697	0.0626261	-1.87937	0.0601946	0.34617
Fus	8169.63	-0.120121	0.078104	-1.53797	0.124057	0.483434
Rpl38	8404.32	0.00300567	0.160007	0.0187846	0.985013	0.997345
Ewsr1	8244.18	0.00599227	0.0613958	0.0976007	0.922249	0.978009
Prmt1	8020.5	0.00986479	0.0522346	0.188856	0.850206	0.955309
Atf4	8415.48	0.264242	0.0831444	3.17811	0.00148239	0.0508857
Nars	8196.75	0.293092	0.0759569	3.85866	0.000114012	0.0101702
Cdk4	8058.29	-0.0272543	0.0487342	-0.559244	0.575995	0.85047
Tagln2	8012.2	0.0286723	0.0659706	0.434622	0.663837	0.888754
Ivns1abp	7805.7	-0.073706	0.0670085	-1.09995	0.271353	0.651659
Cd6	7971.59	-0.120722	0.124697	-0.968121	0.332984	0.70286
Mcm4	7935.7	0.0197322	0.0646517	0.305208	0.760208	0.926974
Srm	7891.33	-0.109532	0.0744238	-1.47174	0.141092	0.510921
Prrc2c	7849.09	-0.0659804	0.106578	-0.619079	0.535865	0.829565
Trbc2	7869.12	-0.0530876	0.0995596	-0.533224	0.593878	0.857714
Il2rb	7792.99	0.0776447	0.123441	0.629002	0.529348	0.827196
Slc7a5	7856.94	0.0758547	0.0875744	0.866174	0.386395	0.74039
Oaz1	7907.52	-0.0057343	0.0946391	-0.0605912	0.951685	0.988686
Hcfc1	7684.06	-0.266308	0.0893443	-2.98069	0.002876	0.0737005
Tap1	7898.36	0.120433	0.0537324	2.24135	0.0250033	0.225178
Eif3l	7819.78	0.0588466	0.0577459	1.01906	0.308174	0.680689
Igtp	7815.18	-0.0570665	0.0669611	-0.852235	0.394084	0.745089
Thrap3	7621.42	-0.233861	0.0707146	-3.30711	0.000942647	0.0410144
Rbbp7	7541.26	-0.0391368	0.0431425	-0.907152	0.364326	0.724082
Sf1	7736.94	-0.107504	0.0531858	-2.02129	0.0432499	0.295253
Gas5	7640.12	0.0612063	0.0989785	0.618379	0.536326	0.829565
Ptp4a2	7427.53	-0.125996	0.048407	-2.60286	0.0092451	0.141037
Tnpo1	7384.04	0.0250523	0.0704222	0.355745	0.722031	0.911258
Rps12-ps3	7521.74	-0.403167	0.216438	-1.86274	0.0624995	0.353134
Nup210	7506.46	-0.344571	0.0595062	-5.7905	7.01768e-09	1.41886e-05
Fbl	7617.94	-0.0147893	0.0558216	-0.264939	0.791057	0.937048
Tubb4b	7424.17	-0.0965485	0.0663144	-1.45592	0.145415	0.517435
Cap1	7345.78	-0.126866	0.0653201	-1.94223	0.0521098	0.322355
Dhx15	7296.79	-0.079581	0.052163	-1.52562	0.127104	0.487458
Anp32e	7342.7	0.0551854	0.0632933	0.8719	0.383263	0.73828
Mcm2	7363.97	-0.0848932	0.0496569	-1.7096	0.0873406	0.411629
Flna	7288.33	-0.0343079	0.099918	-0.34336	0.731327	0.915529
Arf1	7458.94	0.112065	0.0541305	2.07027	0.0384274	0.278306
Rpl7a	7422.72	-0.101242	0.133322	-0.759382	0.447624	0.777337
Srsf7	7330.09	0.029385	0.0833261	0.352651	0.72435	0.912376
Eef1d	7407.75	0.0205531	0.0561598	0.365975	0.714383	0.908188
Kars	7425.6	0.0281034	0.0598871	0.469273	0.638874	0.878647
Srebf2	7443.8	-0.0243969	0.067261	-0.36272	0.716814	0.908733
Fam120a	7162.61	-0.0926076	0.0674457	-1.37307	0.169731	0.547899
Cnot1	7221.62	0.0316615	0.0949764	0.333362	0.738861	0.918531
Dek	7224.94	-0.199397	0.0540315	-3.69038	0.000223919	0.0159786
Srgn	7151.42	0.289692	0.114316	2.53413	0.0112727	0.157143
Nucks1	7226.92	0.00288869	0.0582368	0.0496025	0.960439	0.990991
Cbx5	7329.57	-0.025565	0.0560121	-0.456419	0.648089	0.881508
Snrnp200	7173.3	-0.0431781	0.0920622	-0.46901	0.639062	0.878647
U2af2	7366.32	-0.0263184	0.0574243	-0.458314	0.646727	0.881166
C1qbp	7349.98	-0.167581	0.0621574	-2.69607	0.0070163	0.12141
Smarca5	7168.96	-0.114349	0.0558665	-2.04682	0.0406753	0.284798
Arpc2	7149.08	-0.0131878	0.0451554	-0.292053	0.770246	0.930446
Bclaf1	7170.8	-0.124439	0.0690022	-1.80341	0.0713242	0.376516
Csde1	7103.04	-0.025911	0.0473055	-0.547738	0.583872	0.853573
Gspt1	7095.28	-0.147018	0.0565613	-2.59927	0.00934224	0.141487
Tln1	7061.21	-0.163662	0.0914947	-1.78875	0.0736546	0.381465
Wdr43	7061.32	0.0404265	0.0545958	0.740468	0.459016	0.784824
Smc1a	7144.43	-0.0184596	0.0630531	-0.292762	0.769704	0.930446
Rab8b	6897.47	-0.153119	0.0974194	-1.57175	0.116009	0.471461
Lck	7148.31	-0.0173111	0.0657647	-0.263228	0.792375	0.937714
Noc2l	7093.9	-0.0482493	0.0530851	-0.908906	0.3634	0.723163
Ikzf1	7046.98	-0.216866	0.0813346	-2.66634	0.00766823	0.126862
Prkar1a	6942.03	-0.0694352	0.0501988	-1.3832	0.166602	0.543612
Cd5	6940.05	-0.149804	0.140138	-1.06897	0.285084	0.661379
Sf3b2	7121.5	-0.0835175	0.0520057	-1.60593	0.10829	0.456449
Ahcy	7007.18	-0.134074	0.0626835	-2.13891	0.0324432	0.257571
Satb1	7070.78	0.145347	0.280974	0.517298	0.604948	0.861219
Chchd2	7152.8	-0.169036	0.109869	-1.53853	0.123919	0.483434
Topbp1	6877.24	-0.0357427	0.0567288	-0.630062	0.528654	0.826537
Matr3	6914.98	-0.121364	0.089781	-1.35178	0.176446	0.554853
Phb2	7010.73	-0.121075	0.0636994	-1.90072	0.0573389	0.336353
Eif3h	6986.74	0.00683115	0.051653	0.132251	0.894786	0.971866
Atp2a2	6810.02	-0.194296	0.0785895	-2.47229	0.0134251	0.172569
Ppp1ca	6997.38	-0.17464	0.0507479	-3.44133	0.000578859	0.0297548
Eif2s1	6846.37	-0.0469335	0.0776387	-0.604511	0.545504	0.834355
Hnrnpdl	6945.83	-0.106342	0.0846891	-1.25567	0.209235	0.590148
Csnk1a1	6787.61	-0.0217478	0.0454161	-0.478858	0.63204	0.87614
Txn1	6917.03	0.150602	0.0793761	1.89732	0.0577856	0.338482
Aebp2	6685.08	0.064321	0.0532824	1.20717	0.227367	0.608
Arhgef1	6865.72	-0.21118	0.0693533	-3.04499	0.00232691	0.0643002
Actn4	6716	-0.246802	0.0661061	-3.73342	0.000188899	0.0146184
Psme1	6795.59	0.0938192	0.0528481	1.77526	0.0758548	0.38518
Ccdc50	6557.67	-0.173722	0.125814	-1.38079	0.167344	0.544721
Snu13	6741.96	0.0460933	0.0794206	0.58037	0.561665	0.843174
Lcp2	6500.42	-0.0163689	0.128992	-0.126898	0.899021	0.973635
Eif3i	6693.38	0.0453702	0.0564661	0.803494	0.421689	0.763492
Cltc	6574.9	0.1705	0.0624002	2.73236	0.00628816	0.113853
Myc	6659.23	-0.111258	0.0525937	-2.11543	0.0343937	0.265187
Baz1b	6661.54	-0.0674257	0.0643945	-1.04707	0.295067	0.669933
Tomm70a	6604.23	-0.0547955	0.0504362	-1.08643	0.277289	0.656772
2610507B11Rik	6614.74	0.0118344	0.0798667	0.148177	0.882203	0.967719
Snrpb	6715.53	-0.0303134	0.0559659	-0.54164	0.588066	0.8556
Iars	6524.64	0.052037	0.0734725	0.708251	0.478789	0.794399
Nup205	6494.56	-0.0666932	0.0736293	-0.905797	0.365044	0.724888
Nasp	6659.83	-0.00792394	0.0778112	-0.101835	0.918887	0.976849
Tcof1	6644.83	-0.196774	0.0828599	-2.37478	0.0175593	0.18884
Ucp2	6592.22	-0.097668	0.0838649	-1.16459	0.244186	0.625038
Naa50	6500.99	-0.0436077	0.0518607	-0.840862	0.400425	0.750086
Usp1	6538.04	-0.109125	0.0483689	-2.25609	0.0240652	0.222511
Rbbp4	6476.11	-0.0644426	0.0528471	-1.21942	0.222686	0.603138
Gm10275	6726.06	-0.0276208	0.122614	-0.225266	0.821772	0.945743
Mcl1	6591.45	0.0223105	0.0548536	0.406729	0.684207	0.89643
Rrm2	6453.92	-0.0605549	0.0706288	-0.857368	0.391242	0.74341
Cse1l	6381.65	-0.138215	0.0716537	-1.92894	0.0537388	0.326679
Eif3m	6477.02	-0.198983	0.13798	-1.44212	0.149269	0.522849
Mknk2	6583.98	-0.183048	0.0810175	-2.25937	0.0238605	0.221293
Ddx39	6550.64	0.166844	0.0634258	2.63054	0.00852494	0.135361
Psma7	6541.12	-0.0574595	0.103825	-0.553426	0.579972	0.851573
Ssb	6489.08	-0.11686	0.0817427	-1.42961	0.152829	0.526695
Eif4a-ps4	6482.16	-0.173993	0.103508	-1.68096	0.0927699	0.422519
Gart	6380.32	-0.144486	0.0753755	-1.91688	0.0552532	0.32989
Slc7a1	6477.77	0.138263	0.0921826	1.49988	0.133647	0.497473
Tra2b	6408.12	0.0144446	0.0611349	0.236274	0.81322	0.942476
Bsg	6464.49	0.0922816	0.0808109	1.14195	0.253477	0.632973
Pik3cd	6368.41	-0.265661	0.0881369	-3.01419	0.0025767	0.0681
Itk	6302.22	-0.0190478	0.106358	-0.179092	0.857866	0.957913
Pcbp2	6361.29	-0.237006	0.0541157	-4.37962	1.18885e-05	0.00243475
Mdh2	6315.95	0.0226477	0.0587433	0.385536	0.69984	0.902402
Cyfip2	6311.84	-0.191538	0.0979598	-1.95527	0.0505517	0.318237
Malat1	6351.7	0.318179	0.126097	2.52328	0.0116267	0.159332
Ghitm	6348.51	0.121218	0.0877724	1.38105	0.167263	0.544715
Sub1	6311.92	0.151725	0.100619	1.50791	0.131577	0.493708
Maz	6424.89	-0.204611	0.0472784	-4.32779	1.50615e-05	0.00276835
Fkbp1a	6329.58	-0.0469679	0.0635564	-0.738995	0.45991	0.785909
Mthfd2	6295.36	0.216253	0.0895395	2.41517	0.0157279	0.178407
Tpr	6195.74	-0.0238611	0.0561303	-0.425102	0.670762	0.890947
Supt16	6241.6	-0.0720072	0.0895215	-0.804356	0.421191	0.763279
Gdi2	6178.58	-0.0705803	0.0683017	-1.03336	0.301435	0.676382
Ranbp2	6134.27	0.0321485	0.0636872	0.504787	0.613709	0.865811
Rbpj	6111.17	0.230818	0.218975	1.05408	0.291845	0.667994
Eftud2	6230.44	-0.0850969	0.063179	-1.34692	0.178007	0.556599
Atp5f1	6316.32	0.00585496	0.0802622	0.0729479	0.941848	0.984886
Heatr1	6131.39	0.0329898	0.0792043	0.416516	0.677033	0.8936
Fubp1	6293.89	-0.0312547	0.0686866	-0.455034	0.649085	0.881825
Gnl3	6148.67	0.0476117	0.0599613	0.794041	0.427172	0.765283
Wdr1	6107.88	0.0830278	0.070275	1.18147	0.237416	0.619778
Uba2	6156.56	-0.00132574	0.0430826	-0.0307721	0.975451	0.995099
Ptpn6	6191.37	-0.097718	0.0703241	-1.38954	0.164669	0.541649
Hdac7	6161.29	-0.31394	0.124775	-2.51604	0.011868	0.160861
Cs	6170.81	0.0484604	0.0665367	0.728325	0.466415	0.789132
Aars	6235.32	0.196469	0.0797548	2.46342	0.013762	0.172823
Snrnp70	6246.85	-0.0157119	0.061237	-0.256576	0.797506	0.938821
Srsf11	5975.49	0.000112163	0.0444856	0.00252134	0.997988	0.999749
Thy1	5987.42	0.00906721	0.138759	0.0653451	0.947899	0.987375
Srsf10	6012.09	-0.0527122	0.0551716	-0.955422	0.339364	0.706578
Dkc1	6020.14	-0.132838	0.0642544	-2.06738	0.0386988	0.279176
Rpl17-ps3	5807.39	-0.114995	0.142614	-0.806338	0.420048	0.762603
Capzb	6050.44	-0.136617	0.0417078	-3.27557	0.00105449	0.0423578
Ddx6	6076.44	-0.00116184	0.0781283	-0.0148709	0.988135	0.997758
Nfkb2	5999.25	0.013411	0.102901	0.130329	0.896306	0.972535
Copa	5980.08	0.0487428	0.0626678	0.777796	0.436689	0.770199
Cacybp	5959.86	-0.0881865	0.0930006	-0.948235	0.34301	0.708774
Suz12	5955.01	-0.0567677	0.0418414	-1.35674	0.174865	0.553012
Limd2	6114.69	-0.310594	0.086675	-3.58344	0.000339101	0.0207759
Anp32a	6230.45	0.122656	0.0697727	1.75794	0.0787572	0.393332
Mlec	5983.11	-0.125077	0.051483	-2.42949	0.0151202	0.176538
Mdn1	5923.74	-0.185134	0.097265	-1.9034	0.0569889	0.335551
Pds5a	5874.85	-0.0107814	0.0573306	-0.188056	0.850833	0.955455
Impdh2	6037.44	-0.0981645	0.050262	-1.95305	0.0508131	0.319385
Papola	5879.17	-0.0930342	0.0420276	-2.21365	0.0268531	0.231689
Khsrp	6083.27	-0.326811	0.0600706	-5.44045	5.31466e-08	5.8611e-05
Gm42047	5677.38	-0.215813	0.432112	-0.499438	0.617471	0.867965
Slc38a1	5935.96	-0.0812936	0.0966019	-0.841531	0.40005	0.749731
Brd2	6036.91	-0.0707257	0.0475117	-1.4886	0.136594	0.501975
Rpl21	6104.5	-0.164107	0.305599	-0.537	0.591268	0.857397
Eif3f	6028.9	-0.265442	0.0549245	-4.83285	1.3459e-06	0.00059573
Pclaf	5913.58	0.0328753	0.0476144	0.690449	0.489912	0.802887
Lig1	6036.82	-0.136411	0.0565165	-2.41364	0.015794	0.178407
Rad23b	6014.03	-0.146255	0.0700342	-2.08834	0.0367675	0.272906
Ifi47	6102.6	0.0849533	0.0859462	0.988447	0.322934	0.694224
Ppp1cc	5974.03	-0.120178	0.0516835	-2.32527	0.0200577	0.203105
Atxn2l	6094.84	-0.0290343	0.0738001	-0.393419	0.69401	0.899855
Strap	5845.46	-0.0195968	0.059124	-0.331452	0.740303	0.918733
Rangap1	5939.34	-0.150634	0.0771983	-1.95126	0.0510261	0.320224
Arpc1b	6039.1	0.0950822	0.0582604	1.63202	0.102675	0.442281
Pum2	5777.73	-0.00370182	0.0562526	-0.0658071	0.947531	0.987258
Capza1	5817.88	-0.0578946	0.0621435	-0.931628	0.351529	0.714079
Lmnb1	5922.41	-0.216515	0.0601284	-3.60088	0.000317142	0.0202487
Macf1	5765.41	-0.0778547	0.0943104	-0.825515	0.409079	0.755448
Hnrnpul1	5966.82	-0.156764	0.0685749	-2.28603	0.0222525	0.214582
Polr2a	5850.34	-0.379918	0.101704	-3.73553	0.000187317	0.0146184
Ezh2	5858.4	-0.0647579	0.0471876	-1.37235	0.169954	0.547991
Iqgap1	5747.48	0.00822797	0.0873525	0.0941928	0.924956	0.978405
Hif1a	5902.29	0.27947	0.144344	1.93613	0.0528517	0.324301
Hnrnpul2	5898.71	-0.148304	0.069033	-2.1483	0.0316898	0.254757
Atad2	5728.85	-0.0884194	0.0906441	-0.975457	0.329334	0.699473
Zfp207	5768.78	-0.112077	0.0683857	-1.63889	0.101235	0.438445
Rps28	6116.48	0.0298189	0.107174	0.278229	0.780837	0.93354
Btla	5661.69	-0.0768695	0.111275	-0.690804	0.489689	0.802887
Ncapd2	5806.28	-0.0955174	0.116059	-0.823004	0.410506	0.756242
Atic	5778.1	-0.0319788	0.0720072	-0.444106	0.656966	0.885939
Gls	5656.75	0.0104346	0.0607698	0.171706	0.863668	0.9596
Ly6e	5712.71	0.0675441	0.111493	0.605814	0.544638	0.833692
Hnrnpd	5802.84	-0.127844	0.0618299	-2.06768	0.0386699	0.279176
Ppm1g	5779.43	-0.109773	0.0551726	-1.98964	0.0466311	0.305587
Sept11	5698.87	-0.0121435	0.0677589	-0.179216	0.857768	0.957893
Hmgn2	5621.26	-0.260076	0.0870006	-2.98935	0.00279568	0.0723122
Phb	5766.28	-0.0743609	0.0865599	-0.85907	0.390302	0.74294
Gm6136	5716.62	-0.070129	0.118623	-0.591191	0.554393	0.840201
Ptges3	5675.15	-0.0543704	0.072713	-0.74774	0.454617	0.781751
Ppp2ca	5608.34	-0.0595504	0.0507943	-1.17238	0.241043	0.622383
Rad21	5665.58	0.0016663	0.0812898	0.0204982	0.983646	0.996719
Mthfd1	5681.32	-0.15461	0.0769557	-2.00908	0.044529	0.29866
Hmgn1	5745.06	-0.0842977	0.0768217	-1.09732	0.272503	0.653283
Cd52	5758.41	-0.364175	0.118003	-3.08616	0.00202759	0.059992
Metap2	5616.62	-0.0155096	0.0539266	-0.287605	0.773649	0.931656
Ywhah	5665.17	0.00947604	0.0506527	0.187079	0.851599	0.955774
Psma1	5693.36	0.0371326	0.0906351	0.409694	0.68203	0.89544
Gbp4	5687.27	-0.00581973	0.112079	-0.0519253	0.958588	0.990417
Samhd1	5927.56	0.324262	0.203211	1.59569	0.110558	0.460635
Psma4	5679.86	-0.00740199	0.116724	-0.0634143	0.949437	0.987712
Rbm25	5617.56	0.0771035	0.0552472	1.39561	0.162833	0.53941
Ccng1	5214.18	-0.645334	0.213079	-3.02861	0.00245679	0.0665605
Rrp1	5631.73	0.0356102	0.0675588	0.527099	0.598125	0.859118
Nup153	5479.19	-0.027291	0.0700294	-0.389707	0.696753	0.900809
Rgs1	5255.3	-0.200566	0.242363	-0.827546	0.407928	0.7547
Ppid	5552.1	0.0540564	0.0578848	0.933863	0.350375	0.713295
Grk2	5591.14	-0.117378	0.0751021	-1.56291	0.118075	0.474951
Dnaja1	5695.07	0.0584882	0.0715798	0.817104	0.413869	0.758512
Wnk1	5492.7	-0.0184801	0.0760515	-0.242994	0.80801	0.94126
Lrmp	5468.49	-0.431341	0.140982	-3.05955	0.00221669	0.0626822
Morf4l2	5603.04	-0.0278968	0.0810207	-0.344316	0.730608	0.915488
Prpf19	5551.37	-0.123707	0.0507997	-2.43518	0.0148844	0.176538
Sars	5681.52	0.236748	0.0762642	3.10431	0.00190723	0.0584269
Gm9794	5639.59	0.062068	0.0981466	0.632401	0.527125	0.825386
Trbc1	5470.64	-0.220242	0.123041	-1.78999	0.0734559	0.381388
Adss	5563.44	-0.0900518	0.0789538	-1.14056	0.254052	0.633937
Hells	5413.2	-0.147348	0.0701341	-2.10094	0.0356459	0.269589
M6pr	5517.13	0.0803422	0.0615662	1.30497	0.191902	0.572515
Gm6472	5642.97	-0.309028	0.224353	-1.37742	0.168383	0.545092
Clic4	5681.06	0.497784	0.211019	2.35895	0.0183265	0.192985
Eif4enif1	5532.89	0.0138636	0.0864098	0.16044	0.872534	0.963385
Nhp2	5626.81	-0.0146076	0.0923806	-0.158124	0.874359	0.963794
Itgb1	5307.09	-0.0852126	0.106825	-0.797686	0.425052	0.764674
Mta2	5518.53	-0.155797	0.0612059	-2.54546	0.0109134	0.154895
Srsf5	5574.8	0.118484	0.076825	1.54226	0.123011	0.481794
Dut	5480.13	-0.125851	0.0654073	-1.92411	0.054341	0.328292
Rpa1	5464.4	-0.109379	0.0542887	-2.01477	0.0439287	0.297093
Pfas	5463.5	-0.202381	0.0816708	-2.47801	0.0132118	0.170502
Rps10-ps2	5562.04	-0.163023	0.108239	-1.50613	0.132033	0.494348
Tpm4	5456.72	0.226783	0.0748611	3.02938	0.00245053	0.0665605
Ablim1	5478.74	-0.0230812	0.110056	-0.209722	0.833885	0.95003
Ubr4	5391.46	-0.152868	0.0953107	-1.6039	0.108737	0.457173
Vdac2	5335.14	0.134197	0.0624614	2.14848	0.031676	0.254757
Psma2	5469.96	0.0764889	0.0858997	0.890444	0.373228	0.730742
Ide	5380.68	-0.36913	0.217832	-1.69456	0.0901583	0.417492
Naa15	5278.18	-0.0146071	0.0449133	-0.325228	0.745009	0.920982
Api5	5335.4	-0.0060874	0.0484495	-0.125644	0.900014	0.973635
Psmb4	5466.3	0.0938081	0.0642967	1.45899	0.144568	0.515963
Eif2s3x	5350.51	-0.0765152	0.0827335	-0.924839	0.35505	0.716481
Nampt	5512.6	0.267393	0.0829882	3.22206	0.00127273	0.0466884
Ftsj3	5466.02	0.0398112	0.0820983	0.484921	0.627732	0.873733
Acin1	5459.53	-0.161749	0.0500524	-3.23159	0.00123102	0.0460909
Pdia6	5434.27	0.134177	0.0647164	2.07331	0.0381436	0.277078
Myl6	5534.17	-0.0983375	0.132049	-0.744702	0.456452	0.782867
Ube2i	5350.31	-0.0971228	0.0471048	-2.06184	0.0392225	0.280727
Prelid1	5369.51	0.10714	0.0999746	1.07167	0.283869	0.660328
Serpinb9	5114.22	0.258798	0.15674	1.65113	0.0987114	0.432924
Ptprcap	5404.19	-0.127262	0.0989324	-1.28635	0.198319	0.578938
Vdac1	5348.23	-0.00270251	0.0483559	-0.0558879	0.955431	0.989781
Ubtf	5386.9	-0.114924	0.0586262	-1.96028	0.0499628	0.315512
Srrt	5324.44	-0.175639	0.0538234	-3.26324	0.00110145	0.0430183
Srrm1	5257.36	-0.22787	0.0629071	-3.62232	0.000291976	0.0192497
Stmn1	5376.74	-0.157151	0.0685681	-2.2919	0.0219114	0.212367
Pim2	5314.65	-0.231269	0.0693378	-3.33539	0.000851794	0.0385564
Mogs	5390.33	-0.186692	0.0814611	-2.29179	0.0219177	0.212367
Hjurp	5338.19	0.00799797	0.0889079	0.0899579	0.928321	0.979257
Smc2	5189.14	-0.0746483	0.0617028	-1.2098	0.226354	0.606829
H2afy	5319.53	-0.071265	0.0580603	-1.22743	0.219661	0.599733
Arhgdib	5274.77	-0.0143484	0.0792705	-0.181005	0.856363	0.95781
Gnb1	5241.98	0.0496214	0.0564997	0.878261	0.379802	0.735928
Gnai2	5286.92	-0.103587	0.0882071	-1.17437	0.240249	0.622215
Trip12	5231.09	0.147153	0.0705564	2.08561	0.0370142	0.274083
Ets1	5290.86	-0.0192444	0.0918262	-0.209574	0.834	0.95003
Slc16a1	5225	-0.0197366	0.0526382	-0.374949	0.707698	0.90511
Erh	5253.74	-0.0116885	0.0680058	-0.171875	0.863536	0.9596
Celf1	5249.95	-0.00529787	0.0730758	-0.0724983	0.942205	0.985081
Mapk1	5176.47	-0.134591	0.0599932	-2.24343	0.0248691	0.224573
Serinc3	5266.83	0.186321	0.0890171	2.09309	0.0363409	0.271636
Gramd1b	5130.51	-0.146535	0.118355	-1.2381	0.21568	0.596111
Inpp4b	5057.49	-0.250814	0.135607	-1.84957	0.064376	0.35889
Ubap2l	5261.33	-0.0630929	0.0604759	-1.04327	0.296822	0.672003
Dars	5223.05	-0.0422734	0.0792096	-0.533691	0.593555	0.857714
Birc6	5100.46	-0.0212166	0.0922756	-0.229927	0.818149	0.944005
Mob1a	5149.84	0.0785013	0.0669913	1.17181	0.241272	0.622475
Zfp106	5189.39	0.062783	0.0492546	1.27466	0.202429	0.582408
Khdrbs1	5227.58	-0.110355	0.0545388	-2.02342	0.0430298	0.294357
Arpc5	5118.52	-0.0344221	0.0511192	-0.67337	0.500712	0.810071
Rpn1	5229.93	-0.0532616	0.0574642	-0.926867	0.353996	0.715482
Junb	5368.79	0.216609	0.12146	1.78338	0.0745242	0.381973
Parp1	5196.5	-0.22533	0.0689272	-3.2691	0.00107888	0.042771
Csk	5219.21	-0.227318	0.0541778	-4.19577	2.71947e-05	0.00417461
Laptm5	5068.34	-0.294936	0.0693377	-4.25361	2.10348e-05	0.00335754
Tars	5204	0.221667	0.068114	3.25435	0.00113652	0.0439079
Atp5g3	5327.56	-0.0192604	0.0652547	-0.295157	0.767874	0.92949
Luc7l2	5067.27	0.0416113	0.060416	0.688747	0.490982	0.803468
Dnaja2	5132.38	0.052459	0.062683	0.836893	0.402653	0.752223
Lat	5137.05	-0.00398916	0.103768	-0.0384432	0.969334	0.993494
Gm26917	5222.29	-0.289146	0.25566	-1.13098	0.258064	0.638524
Ptbp3	5063.76	0.0423902	0.0488795	0.867238	0.385812	0.739966
Tmbim6	5192.9	0.155798	0.0723562	2.15321	0.0313021	0.252993
Raly	5176.92	-0.07763	0.0662687	-1.17144	0.241421	0.622545
Jak2	5065.85	0.371843	0.096411	3.85685	0.000114856	0.0101702
Anapc1	5036.41	-0.0528952	0.0798136	-0.662735	0.507501	0.81306
Lars	5177.58	0.250049	0.080328	3.11285	0.00185288	0.0577822
Sdha	5132.11	-0.00590731	0.05264	-0.112221	0.910648	0.976407
Zmiz2	5171.44	-0.135943	0.0826898	-1.64402	0.100173	0.436082
Nxf1	5092.83	0.0892776	0.0401907	2.22135	0.0263273	0.230662
Abcf1	5116.26	-0.149062	0.0546878	-2.72569	0.00641668	0.115005
Hat1	5062.18	-0.0877836	0.0961521	-0.912965	0.361261	0.721853
Tm9sf3	5042.69	-0.0293224	0.0534015	-0.549094	0.582941	0.853138
Xpot	5039.2	0.0999007	0.0659345	1.51515	0.129734	0.491735
Cab39	4964.22	-0.119577	0.0730815	-1.63621	0.101796	0.439461
Hmgcr	5123.81	0.122489	0.0647926	1.89047	0.0586948	0.341992
Hsph1	5011.67	0.0581239	0.0695367	0.835874	0.403226	0.752312
Lrrc59	5081.79	-0.0411959	0.0663298	-0.621076	0.534549	0.828855
Pold1	5118.3	-0.120438	0.0849348	-1.41801	0.156189	0.531928
Nudc	5178.91	0.0148665	0.0662559	0.22438	0.822461	0.945864
Ppa1	5070.42	0.0920155	0.0662655	1.38859	0.164958	0.542145
Rnps1	5080.55	-0.0800421	0.0616803	-1.29769	0.194393	0.575727
St13	5015.51	0.0488737	0.0663867	0.736198	0.46161	0.786819
Cluh	5020.49	-0.329771	0.081966	-4.02326	5.73971e-05	0.00704301
Mars	5041.21	-0.0395035	0.0536833	-0.735862	0.461815	0.787037
Sptan1	4981.98	-0.0202444	0.0813669	-0.248804	0.803512	0.940102
Cdc37	5112.01	0.04086	0.0514997	0.793402	0.427544	0.765283
Ogt	4970.66	0.196058	0.0840417	2.33287	0.0196551	0.200535
Sdf4	5122.83	0.342357	0.112758	3.0362	0.00239579	0.0655312
Cyp51	5113.02	0.0331415	0.0774321	0.428008	0.668645	0.890446
Sh2d2a	5001.4	-0.179896	0.0950124	-1.8934	0.0583048	0.340537
Atp13a3	4858.92	-0.071994	0.0689209	-1.04459	0.296213	0.671279
Kif11	4893.96	-0.120461	0.114412	-1.05287	0.2924	0.668231
Spn	4948.08	-0.259325	0.12401	-2.09116	0.0365136	0.272076
Dnajc2	4982.61	-0.0555337	0.0586747	-0.946468	0.34391	0.709755
Ndfip1	4973.75	-0.210913	0.0588155	-3.586	0.000335785	0.0207759
Aco2	5000.09	-0.0293908	0.0502297	-0.585128	0.558462	0.841699
Gtpbp4	4954.02	0.035844	0.0657704	0.544987	0.585762	0.854894
Stag2	4832.75	-0.297745	0.0955164	-3.11721	0.00182568	0.0575256
Atrx	4831.94	0.023716	0.0600812	0.394733	0.69304	0.899583
Rdx	4933.66	0.0529516	0.0674015	0.785616	0.432093	0.767868
Got2	4927.63	-0.139906	0.0608347	-2.29978	0.0214609	0.209958
Fam49b	4917.71	0.133286	0.0886201	1.50401	0.132578	0.495014
Atp5c1	4866.74	0.0112455	0.0640867	0.175474	0.860708	0.958792
Tcf25	4972.69	0.120348	0.0533386	2.2563	0.0240517	0.222511
Larp4	4820.49	0.0811537	0.0537975	1.5085	0.131426	0.493369
Acsl5	4918.5	-0.00681511	0.0635957	-0.107163	0.91466	0.976849
Uck2	4875.94	-0.124923	0.0566556	-2.20495	0.0274576	0.235232
Ak2	4985.01	0.0488802	0.0891878	0.548059	0.583651	0.853353
Ddx1	4867.01	0.00207151	0.0622758	0.0332634	0.973465	0.994722
Gcn1l1	4879.08	-0.223401	0.0671181	-3.32847	0.000873232	0.0391078
Tuba4a	4842.97	-0.055427	0.0733847	-0.755293	0.450073	0.778198
Snd1	4882.32	-0.112563	0.057973	-1.94165	0.0521792	0.322459
Ifng	4148.95	0.116604	0.54932	0.21227	0.831896	0.949412
Rpn2	4884.94	0.0419611	0.0546095	0.768386	0.442258	0.774398
Ezr	4878.03	-0.155362	0.0532636	-2.91685	0.00353581	0.0824864
Dock2	4780.73	-0.0131529	0.0731466	-0.179815	0.857298	0.957893
Ppp6r1	4845.87	-0.240869	0.0857201	-2.80994	0.00495501	0.0994735
Prpf40a	4707.21	-0.122904	0.0595246	-2.06476	0.038946	0.280388
Otud4	4763.7	0.0670078	0.0545372	1.22866	0.219198	0.599435
Ywhag	4853.19	0.00844421	0.0830562	0.101669	0.91902	0.976849
Atp1b3	4751.18	-0.0986287	0.0495265	-1.99143	0.0464333	0.305587
Mtdh	4773.71	-0.0802304	0.0653097	-1.22846	0.219274	0.599507
Tomm20	4780.49	-0.133196	0.0659953	-2.01827	0.0435635	0.296061
Ctbp1	4788.52	-0.269806	0.0868543	-3.10642	0.0018937	0.0584269
Rhoa	4789.96	-0.072806	0.0538531	-1.35194	0.176395	0.554853
Cycs	4778.63	-0.190808	0.121484	-1.57064	0.116267	0.472034
Eif5b	4797.02	0.00353163	0.0531602	0.0664337	0.947033	0.987073
Nop2	4768.07	-0.0629213	0.0627029	-1.00348	0.315628	0.68655
Jak1	4740.45	-0.0169728	0.0677134	-0.250656	0.80208	0.939512
Esyt1	4777.63	-0.0421974	0.0799825	-0.527583	0.597789	0.85909
Arcn1	4674.58	0.0337435	0.0631243	0.534556	0.592957	0.857714
Dock10	4701.76	0.349952	0.0961534	3.63952	0.000273147	0.0184086
Txnrd1	4688.7	-0.167763	0.081642	-2.05486	0.0398925	0.282107
Calm2	4768.73	0.0183939	0.0983512	0.187023	0.851643	0.955774
Nlrc5	4731.31	0.0686976	0.0635854	1.0804	0.279964	0.656998
Cox4i1	4734.95	-0.0524706	0.0754151	-0.695758	0.48658	0.800808
Btg1	4711.7	-0.113187	0.0745489	-1.51829	0.128942	0.491113
Slc38a2	4716.94	0.221366	0.0699676	3.16384	0.00155701	0.0521772
Ogdh	4621.53	-0.314332	0.0785968	-3.9993	6.35291e-05	0.00748225
Ubr5	4573.63	0.00517916	0.0730338	0.0709146	0.943466	0.985634
Utp20	4552.31	-0.0297654	0.0925825	-0.321502	0.74783	0.922336
Stt3a	4632.65	0.000895835	0.0724664	0.0123621	0.990137	0.998305
Nr4a3	4523.93	-0.247593	0.156182	-1.58529	0.1129	0.46553
Eif4e	4622.44	-0.0014312	0.0767348	-0.0186513	0.985119	0.99737
Ccr7	4659.23	-0.104445	0.10622	-0.983291	0.325464	0.696031
Mapre1	4580.67	-0.00261404	0.0558785	-0.0467808	0.962688	0.991201
Plagl2	4660.14	0.049966	0.106683	0.468358	0.639529	0.878709
Cyb5b	4706.8	0.119291	0.0646541	1.84506	0.0650281	0.360678
Stat3	4662.1	0.189542	0.103201	1.83663	0.0662645	0.363747
Ddx17	4675.58	0.106079	0.0928882	1.14201	0.253449	0.632973
Gpx1	4620.71	-0.0225731	0.0626614	-0.360239	0.718668	0.909753
Psmd8	4619.65	0.12582	0.0520461	2.41747	0.0156287	0.17802
Usp7	4617.22	0.00686489	0.0727764	0.0943285	0.924848	0.978405
Syngr2	4715.51	0.453751	0.210777	2.15275	0.0313384	0.253106
Psmd3	4655.69	-0.19421	0.0581684	-3.33875	0.000841576	0.0383803
Wipf1	4600.84	-0.0362453	0.093552	-0.387434	0.698435	0.901832
Atp5d	4733.63	-0.120218	0.04895	-2.45592	0.0140523	0.174796
Dync1h1	4536.54	-0.138449	0.0885555	-1.56342	0.117954	0.474908
Smarcc1	4566.45	-0.23903	0.0676181	-3.535	0.000407781	0.0232243
Pfkl	4735.33	0.239106	0.0906663	2.63721	0.00835923	0.134339
Il4ra	4743.38	-0.0581078	0.213698	-0.271915	0.785687	0.936134
Abcf2	4595.72	0.0336883	0.0477583	0.705391	0.480567	0.795654
Irgm1	4745.13	0.262978	0.118482	2.21956	0.0264488	0.230662
Gimap3	4554.37	-0.0717969	0.0876974	-0.818688	0.412964	0.758362
Eif1a	4520.28	0.0766388	0.0861636	0.889457	0.373758	0.731271
Eif4ebp2	4546.57	-0.248983	0.0578912	-4.30087	1.70128e-05	0.00286642
Cd28	4505.57	-0.077548	0.0807035	-0.9609	0.336602	0.705202
Hmgb1	4631.6	-0.147786	0.0897735	-1.64622	0.0997193	0.435455
Rac1	4535.39	-0.038191	0.060965	-0.626442	0.531025	0.828298
Lonp1	4642.96	0.122586	0.0926758	1.32274	0.185923	0.565697
Tnfrsf4	4618.42	0.348927	0.093436	3.7344	0.000188161	0.0146184
Nfx1	4531.5	0.0455332	0.0711199	0.640232	0.522022	0.821334
Ebna1bp2	4557.48	0.0403666	0.0652805	0.618357	0.53634	0.829565
Srpk1	4507.19	-0.00179815	0.0547322	-0.0328537	0.973791	0.994722
Snrpd2	4682.19	0.112037	0.0989917	1.13178	0.257726	0.638524
Nol7	4419.04	-0.288472	0.0919714	-3.13654	0.00170956	0.0553204
Taf1d	4485.5	0.103435	0.0999391	1.03498	0.300677	0.675895
Ago2	4420.35	-0.102792	0.0888577	-1.15681	0.247349	0.62787
Scaf11	4443.58	-0.094932	0.0668334	-1.42043	0.155483	0.530158
Psmc3	4526.42	0.148572	0.0654723	2.26924	0.0232538	0.218577
Dot1l	4476.04	-0.138923	0.0898913	-1.54545	0.122236	0.481179
Ywhaq	4392.16	-0.1162	0.0800661	-1.4513	0.146697	0.519061
Cd69	4437.89	0.158909	0.117113	1.35688	0.174819	0.553012
Mthfd1l	4506.81	0.0367245	0.066713	0.550485	0.581986	0.852585
Ccna2	4371.99	-0.0680979	0.0817127	-0.833382	0.404629	0.753226
Fth1	4465.92	-0.170595	0.0895	-1.90608	0.0566393	0.334514
Trac	4347.11	-0.164687	0.107119	-1.53743	0.124188	0.48379
Stat5a	4414.12	0.299426	0.125858	2.37908	0.0173557	0.187867
Hprt	4441.12	0.100549	0.0651681	1.54291	0.122852	0.481794
Irf1	4577.22	0.122427	0.0788308	1.55304	0.120414	0.478485
Trap1	4427.22	-0.0657976	0.0426864	-1.54142	0.123215	0.481858
Ddx27	4433.14	-0.0329565	0.0644321	-0.511492	0.609007	0.86347
Nsd2	4387.4	-0.0848003	0.0624311	-1.3583	0.174368	0.552635
Ddx18	4441.24	0.0724035	0.0550542	1.31513	0.188466	0.568726
Iigp1	4457.94	-0.00714133	0.0918097	-0.077784	0.938	0.983791
Cd164	4371.43	-0.125496	0.0865582	-1.44984	0.147103	0.519189
Stk4	4369.09	-0.0166274	0.0936464	-0.177555	0.859072	0.958145
Ppp1cb	4318.4	-0.0246073	0.0542653	-0.453463	0.650215	0.882201
Cdca7	4407.76	-0.120577	0.0921989	-1.30779	0.190944	0.571621
Npc2	4567.28	0.353571	0.0815163	4.33743	1.44161e-05	0.00269049
Smchd1	4349.83	0.0472562	0.0595863	0.793072	0.427736	0.765283
Smarca4	4392.69	-0.308122	0.0656188	-4.69564	2.65774e-06	0.000948268
Rtcb	4455.17	0.0385817	0.054308	0.710424	0.477441	0.794091
Rpl7l1	4407.19	-0.0636403	0.0708309	-0.898483	0.368928	0.727608
Ganab	4389.72	0.00063018	0.0719878	0.00875399	0.993015	0.998799
BC005537	4418.14	0.0485027	0.0568009	0.853908	0.393156	0.744036
Gimap4	4408.31	0.0741861	0.104802	0.707865	0.479029	0.794405
Ywhab	4357.48	0.0219784	0.0549273	0.400136	0.689056	0.898328
Zap70	4357.63	-0.243301	0.0896733	-2.71319	0.00666384	0.117186
Mdh1	4354.14	-0.172205	0.117887	-1.46077	0.14408	0.515531
Spcs3	4278.49	-0.015743	0.0547893	-0.287338	0.773854	0.931656
Ccnl2	4344.28	-0.00810191	0.0668792	-0.121142	0.903578	0.974512
Ssr3	4297.19	0.161516	0.0830006	1.94596	0.05166	0.321229
Rpl14-ps1	4416.24	-0.102151	0.117854	-0.866758	0.386075	0.740119
Cnn2	4410.57	-0.112695	0.0652922	-1.726	0.0843467	0.405876
Ppp2r1a	4375.21	-0.0267982	0.0605734	-0.442409	0.658193	0.886143
Hivep3	4284.05	-0.625276	0.154846	-4.03804	5.38998e-05	0.00681103
Jak3	4395.48	-0.0779224	0.0866646	-0.899126	0.368586	0.727516
Immt	4344.37	-0.0411546	0.0694305	-0.592745	0.553352	0.839467
Smg1	4237.31	0.135319	0.0883098	1.53232	0.125443	0.484958
Calm3	4378.02	-0.090189	0.0595145	-1.51541	0.129668	0.491735
Stt3b	4332.96	-0.0228487	0.0511043	-0.447098	0.654804	0.884963
Uqcrc1	4306.63	-0.200765	0.0575069	-3.49115	0.000480943	0.0259303
Bzw2	4302.4	-0.00387884	0.0685397	-0.0565926	0.95487	0.989622
Mllt6	4394.03	-0.0148956	0.109777	-0.13569	0.892066	0.970877
Gm8995	4211.27	-0.122647	0.138342	-0.886549	0.375322	0.732541
Ddx46	4280.1	-0.0916383	0.0622313	-1.47254	0.140874	0.510813
Top1	4196.25	-0.0623499	0.0707025	-0.881862	0.377851	0.73457
Bag6	4334.18	-0.266424	0.0635404	-4.19299	2.75302e-05	0.00417461
Nup85	4254.96	0.0652181	0.0515287	1.26566	0.205633	0.586673
Cd200	4094.54	0.0306092	0.128431	0.238332	0.811623	0.942059
Tra2a	4208.31	-0.0700943	0.0776543	-0.902646	0.366714	0.725948
Banf1	4288.06	0.133765	0.0733385	1.82395	0.0681602	0.368413
Cd82	4331.82	0.355945	0.108994	3.26573	0.00109183	0.0429057
Xrn2	4247.88	0.0267716	0.066396	0.403212	0.686792	0.897245
Adsl	4199.36	-0.0585437	0.0670688	-0.87289	0.382723	0.737774
Nisch	4247.07	-0.0188442	0.0866667	-0.217432	0.827871	0.948397
Slc3a2	4321.12	0.21611	0.0767544	2.81561	0.0048685	0.0994735
Celf2	4106.52	-0.0310872	0.0953255	-0.326117	0.744336	0.920443
Ruvbl2	4256.83	0.136325	0.0532207	2.56151	0.0104219	0.15004
Atl3	4192.99	-0.0688592	0.0611827	-1.12547	0.260391	0.639952
Pak2	4162.96	-0.0235407	0.0566489	-0.415553	0.677737	0.893988
Psmd1	4130.5	-0.189075	0.0698865	-2.70545	0.00682117	0.11855
Fermt3	4261.51	-0.00825675	0.0774716	-0.106578	0.915124	0.976849
Ctnnb1	4208.73	-0.0672959	0.0665713	-1.01088	0.312072	0.683721
Psmc6	4196.82	-0.0668923	0.104217	-0.641854	0.520968	0.820335
Pdcd11	4216.59	-0.0192291	0.0773067	-0.248738	0.803563	0.940102
Hint1	4305.58	0.0141619	0.0829639	0.1707	0.86446	0.9596
Top2b	4102.31	-0.184125	0.118086	-1.55924	0.118939	0.475715
Ncor1	4135.97	-0.0686389	0.0865949	-0.792644	0.427986	0.765283
Rnf19b	4397.02	0.57605	0.322284	1.7874	0.0738727	0.38149
Oxct1	4095.08	-0.228856	0.0976211	-2.34432	0.0190616	0.19765
Nsa2	4232.22	-0.185754	0.103051	-1.80254	0.071461	0.376595
Sympk	4210.35	-0.268722	0.0721298	-3.72553	0.000194904	0.0146856
Emg1	4209.48	0.121907	0.071046	1.71589	0.0861822	0.408868
Psmb3	4250.4	0.00972378	0.107593	0.0903757	0.927989	0.979077
Chtop	4186.69	-0.0709152	0.0543416	-1.30499	0.191897	0.572515
Arf6	4231.51	-0.0582511	0.0962731	-0.605061	0.545138	0.834121
Cpsf6	4101.14	-0.0330177	0.0422677	-0.781156	0.434711	0.769087
Rtn3	4122.36	0.0866592	0.0745908	1.16179	0.245319	0.625783
Atp5g2	4227.18	0.0133763	0.0813996	0.164329	0.869472	0.961317
Ncbp1	4095.4	-0.0243296	0.0592981	-0.410293	0.681591	0.895234
Tuba1c	4136.36	0.0938291	0.100039	0.937929	0.348281	0.712025
Gm6793	4318.96	-0.0287458	0.0766071	-0.375237	0.707484	0.905047
Ranbp1	4090.88	-0.0800703	0.077733	-1.03007	0.302978	0.677357
Pes1	4195.18	0.0602055	0.0636075	0.946516	0.343886	0.709755
Pnn	4164.53	-0.137593	0.0614989	-2.23732	0.0252656	0.226364
Cotl1	4122.84	-0.366323	0.0789057	-4.64254	3.4415e-06	0.00109865
Mycbp2	4077.35	0.0430544	0.0726433	0.592683	0.553394	0.839467
Cbfb	4006.3	-0.190582	0.0662723	-2.87574	0.00403076	0.0885819
Ppp1r14b	4250.04	-0.108409	0.0764607	-1.41785	0.156236	0.531939
Dazap2	4149.56	0.10224	0.0663436	1.54107	0.123301	0.482037
Sla	4018.03	0.0235843	0.138138	0.17073	0.864436	0.9596
Sept9	4076.96	-0.0683697	0.121292	-0.563678	0.572974	0.848925
Ankrd17	4059.7	0.0225798	0.0843595	0.267661	0.78896	0.936233
Rapgef1	4117.43	-0.168661	0.0662861	-2.54443	0.0109456	0.154936
Ncaph2	4076.34	-0.0338109	0.0505041	-0.669467	0.503197	0.810821
Glud1	4039.95	-0.0790785	0.058946	-1.34154	0.179745	0.558005
Psma3	4047.7	-0.106543	0.114198	-0.932963	0.350839	0.713739
U2surp	4001.36	0.00902742	0.0712806	0.126646	0.89922	0.973635
Tnfrsf9	3984.34	0.0497825	0.123227	0.40399	0.68622	0.896944
H3f3a	4128.64	-0.150344	0.0876384	-1.71551	0.086252	0.40904
Exoc2	4027.49	-0.178291	0.131856	-1.35217	0.176322	0.554853
Nap1l4	4025.25	-0.106509	0.047437	-2.24528	0.02475	0.224558
Amd1	3988.71	0.0999739	0.0693584	1.44141	0.149469	0.522849
Nup62	4118.95	0.0882175	0.0597184	1.47722	0.139616	0.507788
Ahsa1	4134.38	0.118688	0.0616128	1.92635	0.0540607	0.327414
Gabpb2	4002.9	-0.108136	0.0828484	-1.30522	0.191816	0.572515
Erap1	3973.85	-0.0740944	0.0567467	-1.3057	0.191654	0.572515
Ppp5c	4052	0.0117341	0.0611856	0.191778	0.847916	0.954902
Xpo6	3976.54	-0.191856	0.0629157	-3.04942	0.00229282	0.0639408
Hyou1	4023.67	-0.0854053	0.0828854	-1.0304	0.302821	0.677357
Rfwd3	3982.98	-0.0886605	0.0599587	-1.47869	0.139223	0.506875
Pml	4202.88	0.397931	0.151131	2.63303	0.00846277	0.135184
Srp72	3953.77	-0.0769171	0.0673269	-1.14244	0.25327	0.632973
Psmc1	4110.41	0.116252	0.0725763	1.6018	0.109201	0.457931
Ftl1	4067.58	0.000922878	0.0669237	0.01379	0.988998	0.997964
Mdm4	3940.49	0.130247	0.067205	1.93805	0.0526172	0.323913
Arl6ip1	3958.55	0.0476111	0.0892645	0.533371	0.593777	0.857714
Ep400	4007.21	-0.097419	0.0700307	-1.39109	0.164198	0.540834
Ppat	3943.23	-0.163519	0.0702232	-2.32857	0.0198819	0.201494
Cd44	3861.17	0.34733	0.137613	2.52397	0.0116038	0.159277
Dazap1	4062.91	-0.163672	0.0541494	-3.0226	0.00250613	0.06741
Umps	3981.6	-0.109748	0.059856	-1.83353	0.0667232	0.364387
Cd47	4037.27	0.0752315	0.0907838	0.828689	0.407281	0.754347
Akt1	4013.51	-0.19207	0.0630688	-3.0454	0.00232369	0.0643002
Lyar	4031.46	-0.0377772	0.0777685	-0.485765	0.627133	0.873733
Psmd7	3970.69	0.0639922	0.0648661	0.986528	0.323874	0.694646
Psip1	3967.35	-0.118731	0.0679707	-1.74679	0.0806738	0.397504
Psmb1	3974.15	0.0420962	0.0694169	0.606426	0.544232	0.833626
Lbr	3983.55	-0.0846259	0.0660239	-1.28175	0.199932	0.579678
Fnbp1	3993.12	0.0194124	0.0799636	0.242765	0.808187	0.94126
Sod1	4077.96	0.032682	0.0604167	0.540943	0.588547	0.8556
Myo1g	3994.76	0.416525	0.205601	2.02589	0.0427757	0.29316
Glrx3	3933.36	-0.170225	0.145043	-1.17362	0.240548	0.622383
Mrfap1	3996.79	0.0248111	0.0690234	0.359459	0.719252	0.910194
Apobec3	3972.97	0.208492	0.12458	1.67356	0.094217	0.425417
Selenof	3860.28	-0.181489	0.156232	-1.16166	0.245373	0.625783
Itgb2	3873.1	-0.135084	0.0643903	-2.09789	0.0359147	0.270106
Isyna1	3951.09	-0.208476	0.058862	-3.54178	0.00039744	0.0227471
Dgkz	3932.85	-0.454592	0.0815192	-5.5765	2.45405e-08	3.72127e-05
Slc25a4	3994.69	0.0533636	0.0711989	0.7495	0.453556	0.781103
Sec61a1	3939.15	0.0372889	0.0646321	0.57694	0.56398	0.844118
Uqcrc2	3904.44	-0.040692	0.0689213	-0.590412	0.554914	0.840271
Cyc1	4000.1	-0.177112	0.0669603	-2.64503	0.00816839	0.132297
Hdac1	3896.83	0.0725004	0.0517328	1.40144	0.161082	0.536942
Eif3d	3943.05	0.0281545	0.0606817	0.463969	0.64267	0.879624
Eif3k	3992.11	0.0853564	0.0585656	1.45745	0.144992	0.51652
Prkca	3826.62	-0.283187	0.0948272	-2.98635	0.0028233	0.0727165
Rbck1	3945.24	-0.103468	0.0586565	-1.76397	0.0777371	0.391949
Tapbp	4042.79	0.193341	0.093696	2.06349	0.0390664	0.280423
Gnai3	3837.98	-0.0177365	0.0599645	-0.295783	0.767396	0.929163
Pim1	4003.07	0.192802	0.198612	0.970747	0.331674	0.701699
Foxp1	3848.1	-0.326982	0.105914	-3.08725	0.00202019	0.0599191
Purb	3867.7	-0.0722129	0.0710819	-1.01591	0.309672	0.682166
Ube2s	3908.88	-7.75038e-05	0.103324	-0.000750106	0.999402	0.99977
Rpl17-ps10	3972.08	-0.00693361	0.34925	-0.0198529	0.984161	0.99703
Gna13	3918.42	0.286091	0.0687178	4.16327	3.13719e-05	0.00453063
Gm10123	3919.98	-0.382666	0.23928	-1.59924	0.109768	0.458812
Tmed2	3913.19	0.00222885	0.0567909	0.0392466	0.968694	0.993132
Cops2	3792.31	-0.145964	0.10098	-1.44548	0.148323	0.521451
Arid1a	3873.72	-0.229788	0.0729807	-3.14861	0.00164048	0.054078
Edem1	3842.15	-0.0870228	0.0714698	-1.21762	0.223369	0.603221
Yme1l1	3822.59	-0.157735	0.0744314	-2.1192	0.0340738	0.26423
Ubap2	3856.61	-0.255107	0.0742373	-3.43638	0.000589551	0.0300498
Supt6	3875.13	-0.0456531	0.0847868	-0.538446	0.590269	0.856731
Tes	3841.09	0.18386	0.0954763	1.92571	0.0541407	0.327735
Stat6	3870.64	-0.0298735	0.0488182	-0.611934	0.540581	0.831574
Eif4a3	3860.1	-0.118983	0.0578693	-2.05607	0.0397757	0.28201
Fam107b	3798.14	0.0605549	0.069007	0.877519	0.380205	0.735961
Tagap	3868.09	0.266177	0.0966647	2.75361	0.00589424	0.109492
Pole	3846.72	-0.0754355	0.0725302	-1.04006	0.298314	0.673583
Nop53	3930.06	-0.0432375	0.0549216	-0.787259	0.43113	0.767642
Calu	3855.98	-0.0117021	0.0598051	-0.19567	0.844868	0.953773
Pum3	3827.41	0.0641494	0.0707617	0.906555	0.364642	0.724447
Ssr1	3843.37	0.095686	0.0598433	1.59894	0.109833	0.458812
Pomp	3864.44	0.0826201	0.100667	0.820726	0.411803	0.757472
Cand1	3796.23	-0.0827443	0.0662972	-1.24808	0.212001	0.592987
Rars	3861.63	0.130329	0.0584351	2.23032	0.0257259	0.228272
B4galnt1	3774.23	-0.409873	0.108767	-3.76835	0.000164328	0.013561
Ap2m1	3778.63	0.0813556	0.0563864	1.44282	0.14907	0.5225
Ilf3	3839.19	-0.116481	0.0619471	-1.88034	0.0600624	0.345808
E2f4	3800.77	-0.162077	0.0503431	-3.21945	0.00128438	0.0466884
Slbp	3823.72	0.0207212	0.0490713	0.422267	0.67283	0.891483
Hmga1	3937.24	-0.112913	0.0708925	-1.59274	0.111218	0.461284
Uqcrfs1	3893.65	-0.0529139	0.0542278	-0.975772	0.329178	0.699344
Rfc1	3791.1	-0.0568954	0.0628954	-0.904604	0.365675	0.725312
Rcc1	3818.63	-0.0750208	0.073152	-1.02555	0.305106	0.678788
Fkbp8	3838.11	-0.0896108	0.0719944	-1.24469	0.213246	0.593669
Eif6	3866.06	0.187648	0.0829614	2.26188	0.0237051	0.220767
Phf6	3701.66	-0.227837	0.09586	-2.37676	0.0174653	0.18833
Ahctf1	3695.18	0.0720442	0.0621237	1.15969	0.246175	0.626726
Il12rb1	3844.21	-0.0300408	0.0668089	-0.449652	0.652961	0.883949
Snrpd1	3774.48	-0.0787219	0.107874	-0.729761	0.465537	0.788898
Ddx24	3842.17	0.226108	0.101323	2.23156	0.0256439	0.228069
Jpt1	3781.66	0.063387	0.0741006	0.855419	0.392319	0.74341
Ccnd3	3830.93	0.0300553	0.073195	0.410619	0.681352	0.895113
Ptp4a3	3731.91	-0.4963	0.117672	-4.21765	2.46859e-05	0.0038393
Hectd1	3700.26	-0.0112589	0.0806319	-0.139634	0.888949	0.969795
Rps3a2	3818.97	-0.37542	0.99442	-0.377527	0.705782	0.904044
Prpf38b	3789.56	0.00191807	0.0623782	0.0307491	0.97547	0.995099
Il2rg	3707.2	-0.0861826	0.0733589	-1.17481	0.240072	0.622023
Prmt5	3702.33	-0.0327439	0.0695433	-0.470841	0.637754	0.878647
Kpna3	3713.79	-0.016622	0.0607902	-0.273432	0.784521	0.935453
Prpf4b	3698.58	-0.0419247	0.0501934	-0.835264	0.403569	0.752647
Skp1a	3718.09	-0.084848	0.0523694	-1.62018	0.105193	0.448032
Tcf7	3673.73	-0.435732	0.0851489	-5.1173	3.09948e-07	0.000197893
Agpat3	3778	-0.0488247	0.0785877	-0.621277	0.534417	0.828855
Dlst	3723.3	-0.029912	0.0584693	-0.511584	0.608942	0.86347
Kpna4	3654.6	-0.0591339	0.0523254	-1.13012	0.258426	0.638618
Txn2	3708.19	-0.0916617	0.0761353	-1.20393	0.228616	0.609479
Tomm40	3766.83	-0.0950407	0.065362	-1.45407	0.145928	0.518375
Grk6	3750.97	-0.135088	0.0645402	-2.09308	0.036342	0.271636
Prdx3	3734.33	0.00336092	0.0817306	0.041122	0.967199	0.992479
Tmem123	3802.61	0.406574	0.309796	1.31239	0.189387	0.569947
Zc3hav1	3746.54	0.151738	0.0818369	1.85415	0.0637176	0.356695
Bcl2l1	3724.01	0.139155	0.11737	1.18561	0.235778	0.617758
Txlna	3680.31	-0.0433727	0.0566191	-0.766043	0.443651	0.77444
Ppan	3721.76	-0.0585606	0.0749922	-0.78089	0.434867	0.769087
Prrc2b	3678.31	-0.327722	0.0846714	-3.87051	0.000108606	0.0100624
Gbp5	3772.81	0.0888514	0.0820964	1.08228	0.279128	0.656838
Gm15427	3643.15	-0.149085	0.13867	-1.07511	0.282327	0.659017
Psmb8	3806.66	0.134399	0.0954986	1.40734	0.159327	0.53466
Eif1ax	3714.81	0.0563067	0.0762929	0.738034	0.460494	0.786107
Lman2	3694.66	0.0507804	0.0647411	0.784362	0.432828	0.768248
Ecpas	3658.12	0.0778005	0.063088	1.23321	0.217498	0.597805
Bop1	3682.52	-0.0674977	0.0596685	-1.13121	0.257966	0.638524
Malt1	3604.74	0.307967	0.115086	2.67597	0.00745138	0.12468
Rapgef6	3606.61	-0.025244	0.0974532	-0.259037	0.795607	0.938118
Cd3e	3598.98	-0.460907	0.116018	-3.9727	7.10617e-05	0.00790871
Ptpn7	3620.85	-0.204905	0.102508	-1.99893	0.0456164	0.302517
Rif1	3556.75	-0.0450932	0.0867395	-0.519869	0.603155	0.860688
Ptpn1	3744.64	-0.00154448	0.123403	-0.0125157	0.990014	0.998305
Numa1	3682.15	-0.207902	0.0852042	-2.44004	0.0146856	0.176213
Arf3	3688.7	-0.0673271	0.0676176	-0.995705	0.319393	0.690899
Baz1a	3608.19	0.0662894	0.0840424	0.788761	0.430252	0.767413
Polr1a	3661.47	0.00392359	0.0762013	0.0514898	0.958935	0.990535
Puf60	3674.47	-0.164089	0.0522894	-3.13809	0.00170056	0.0553068
Dcaf7	3623.26	-0.180388	0.0708165	-2.54726	0.0108572	0.154406
Skiv2l2	3592.29	-0.0875414	0.0648127	-1.35068	0.176797	0.555197
Aldh18a1	3673.93	0.189785	0.0845364	2.24501	0.0247678	0.224558
Gmps	3602.19	0.125039	0.064826	1.92884	0.0537506	0.326679
Utp4	3575.53	0.0652298	0.0762431	0.85555	0.392247	0.74341
Vasp	3749.63	-0.12485	0.0858493	-1.45429	0.145866	0.518375
Ncoa3	3645.11	-0.00636045	0.119096	-0.053406	0.957408	0.990299
Luc7l3	3607.28	-0.0329597	0.0824503	-0.399752	0.689339	0.898514
Smc3	3632.05	-0.00100686	0.0622318	-0.0161792	0.987091	0.997628
Far1	3535.4	-0.0448948	0.0946576	-0.474286	0.635296	0.878265
Alkbh5	3688.35	0.0203693	0.0951089	0.214169	0.830416	0.949013
Serp1	3611.59	-0.0457431	0.0909637	-0.502872	0.615054	0.865976
Lars2	3810.31	0.407609	0.292718	1.3925	0.163772	0.540567
Clptm1l	3588.16	-0.0730631	0.050407	-1.44946	0.147208	0.519189
Nadk	3601.82	-0.0846383	0.0549889	-1.53919	0.123758	0.483047
Rpsa-ps10	3679.37	0.211191	0.103049	2.04943	0.0404202	0.284283
Ccar1	3536.01	0.0474147	0.0895505	0.529475	0.596476	0.858787
Csnk2a1	3622.07	0.0175317	0.0852013	0.205767	0.836973	0.951416
Copb2	3597.87	0.0325965	0.0586197	0.556068	0.578165	0.850571
Sept1	3592.21	-0.275674	0.0578167	-4.76808	1.85992e-06	0.000752088
Rnf4	3543.94	0.0674768	0.0761829	0.885721	0.375768	0.732541
Akt2	3656.32	0.0203924	0.060176	0.338879	0.734701	0.917545
Alyref	3637.27	-0.0861682	0.0651955	-1.32169	0.186272	0.566437
Xpo5	3555.66	0.00886771	0.0778366	0.113927	0.909295	0.976407
Wdr26	3555.87	-0.0915219	0.0697872	-1.31144	0.189708	0.570315
Casp3	3513.46	-0.0797233	0.0813692	-0.979772	0.327199	0.697215
Akap8	3607.1	-0.0332047	0.0578984	-0.5735	0.566306	0.844754
Fyn	3555.53	-0.220689	0.0921172	-2.39575	0.0165866	0.182799
Polr2m	3568.56	-0.217652	0.0550499	-3.95372	7.69455e-05	0.00827514
Bms1	3602.58	0.0372405	0.0926835	0.401803	0.687829	0.897886
Psme2	3622.78	0.0695957	0.136481	0.509931	0.6101	0.863859
Vps35	3536.26	-0.0924322	0.0845747	-1.09291	0.274435	0.654824
Srpr	3579.89	0.0217077	0.0697859	0.311061	0.755754	0.924479
Clint1	3575.41	-0.172045	0.0724769	-2.37379	0.0176065	0.189015
Uqcrq	3656.84	0.0626946	0.109014	0.575105	0.56522	0.844288
Cnot6	3497.3	-0.0522333	0.0550383	-0.949036	0.342603	0.708712
Dbnl	3562.53	-0.173437	0.0636437	-2.72513	0.00642763	0.115005
Snhg1	3597.8	0.0451211	0.0982826	0.459095	0.646166	0.88103
Stard7	3598.36	-0.0661583	0.0465667	-1.42072	0.155398	0.530126
Pprc1	3547.1	-0.141347	0.0678339	-2.08373	0.0371852	0.274083
Chmp4b	3658.07	0.316538	0.102745	3.08081	0.00206441	0.0603318
Rasal3	3573.74	-0.153925	0.0694848	-2.21523	0.0267442	0.231408
Setd5	3533.01	0.452523	0.0998472	4.53216	5.83844e-06	0.00147554
Ankrd11	3588.56	-0.183172	0.0970277	-1.88783	0.0590485	0.342899
Nckap1l	3539.42	0.118582	0.0658084	1.80193	0.0715564	0.376595
Trrap	3511.61	-0.229551	0.0888406	-2.58385	0.00977036	0.144561
Lrpprc	3479.58	-0.00440386	0.0675861	-0.0651593	0.948047	0.987398
Tnks2	3473.93	-0.0127857	0.0538648	-0.237367	0.812372	0.942476
Nup107	3515.3	-0.0435687	0.0643398	-0.677165	0.498301	0.808526
Sept6	3537	-0.103698	0.0862985	-1.20162	0.229511	0.610971
Sbno1	3476.73	0.0412235	0.0746277	0.552389	0.580682	0.851887
Txnl1	3547.5	-0.0292139	0.0660451	-0.442332	0.658249	0.886143
Mtpn	3486.8	-0.0367279	0.0570449	-0.643842	0.519678	0.820134
Nup155	3489.46	-0.0122827	0.0754958	-0.162694	0.870759	0.962301
Fam168b	3540.55	-0.129433	0.0548036	-2.36176	0.0181886	0.192259
Sec24c	3549.54	0.00368362	0.0582746	0.0632114	0.949598	0.987712
Azin1	3451.72	0.121317	0.0879143	1.37995	0.167603	0.54507
Gm16286	3491.18	0.00334146	0.0587951	0.0568322	0.954679	0.989588
Clic1	3567.78	0.190565	0.0766568	2.48595	0.0129207	0.168721
Ddost	3517.09	0.0614726	0.0473982	1.29694	0.194652	0.575839
Rab10	3503.94	-0.0917995	0.0542732	-1.69143	0.0907541	0.419189
Shmt1	3493.87	-0.0126	0.0678518	-0.185698	0.852681	0.95635
Cox8a	3574.04	-0.101073	0.0992075	-1.01881	0.308294	0.680689
Rap1a	3452.24	-0.112937	0.0800974	-1.41	0.158541	0.534239
Nup160	3415.1	-0.00377555	0.0654971	-0.0576445	0.954032	0.989588
Prpf31	3563.55	0.0761233	0.0839273	0.907015	0.364399	0.724082
Wdr36	3472.12	-0.0418798	0.0540893	-0.774272	0.43877	0.771897
Pafah1b1	3483.81	0.0494425	0.047514	1.04059	0.298067	0.673469
Ctcf	3456.2	-0.157728	0.0708989	-2.22469	0.026102	0.229618
Nsd1	3440.15	-0.0406484	0.0733534	-0.554144	0.57948	0.85133
Tbrg4	3471.6	-0.0503596	0.0672686	-0.748635	0.454077	0.781468
Psmc4	3493.42	0.167959	0.0611117	2.74838	0.00598898	0.110582
Ppp2r5a	3522.06	-0.108925	0.0525479	-2.07288	0.0381836	0.277197
Pitrm1	3448.71	-0.0866009	0.0811436	-1.06726	0.285856	0.661723
Cytip	3474.39	0.0462041	0.136923	0.337446	0.73578	0.917909
Psd4	3471.9	0.0137338	0.056473	0.243192	0.807857	0.94126
Ppp1r15b	3491.71	0.0314927	0.0566923	0.555502	0.578551	0.850716
Ncapg2	3415.03	0.00580841	0.0637435	0.0911216	0.927396	0.978965
Capza2	3431.46	0.164421	0.067608	2.43198	0.0150165	0.176538
Cox6a1	3525.22	-0.15753	0.0703637	-2.23879	0.0251696	0.225671
Sfxn1	3422.5	-0.062261	0.0478055	-1.30238	0.192787	0.573706
Eif4g3	3434.92	-0.200948	0.0535622	-3.75167	0.000175659	0.0143014
Nacc1	3488.81	-0.237491	0.0665996	-3.56595	0.000362544	0.0215589
Nup188	3433.12	-0.166581	0.0757229	-2.19987	0.0278159	0.236637
Eif3g	3512.97	0.0417964	0.0714951	0.584605	0.558813	0.841898
Yars	3495.57	0.18304	0.0675494	2.70972	0.00673402	0.117879
Atp11b	3462.15	0.175735	0.0886558	1.98221	0.0474554	0.30891
Ckap5	3362.69	0.0160547	0.117986	0.136072	0.891764	0.970833
Hdac2	3440.08	-0.0723199	0.0733967	-0.985328	0.324463	0.694926
Rbbp6	3443.76	-0.0817537	0.0684726	-1.19396	0.232493	0.613954
Cbx3	3452.16	-0.173779	0.0834667	-2.08202	0.0373408	0.2744
Psma6	3460.44	0.0872274	0.0634499	1.37474	0.169211	0.546682
Usp24	3349.95	-0.182766	0.0747881	-2.44379	0.014534	0.17531
Aqr	3391.79	-0.00815129	0.095509	-0.0853458	0.931986	0.980983
Snrpe	3369.27	-0.192676	0.140748	-1.36894	0.171017	0.549465
Pdap1	3564.3	-0.179365	0.0875617	-2.04844	0.0405172	0.284378
Chtf8	3506.43	0.0252629	0.0836259	0.302094	0.76258	0.927777
Exosc10	3410.93	-0.050822	0.0752168	-0.675673	0.499248	0.809027
Ppp2r5c	3363.09	-0.0388102	0.0724029	-0.536031	0.591937	0.857397
Bub3	3400.58	0.093546	0.0580224	1.61224	0.10691	0.452505
Cdk6	3386.89	0.153826	0.102615	1.49907	0.133855	0.497945
Noc4l	3405.08	0.0288644	0.067781	0.425847	0.670219	0.890713
Nup98	3400.43	0.0568271	0.081755	0.69509	0.486999	0.800838
Tnfsf8	3329.9	0.291138	0.224454	1.2971	0.194598	0.575839
Tipin	3384.07	0.0433284	0.0751886	0.576263	0.564438	0.844118
Rabggtb	3404.22	0.222619	0.0768794	2.89569	0.00378321	0.0854639
Mapkapk2	3490.32	0.28817	0.111052	2.59491	0.00946151	0.142228
Etnk1	3454.42	0.294034	0.107099	2.74544	0.00604303	0.111073
Nomo1	3377.72	-0.196778	0.0675053	-2.915	0.00355684	0.0828176
Notch1	3349.46	-0.439702	0.131494	-3.34391	0.00082608	0.0378987
Pgd	3478.25	0.132249	0.0914701	1.44581	0.14823	0.521443
Stat5b	3398.87	0.0628272	0.119104	0.527499	0.597847	0.85909
Lsm14a	3386.23	-0.0257261	0.0472629	-0.544319	0.586222	0.855163
Wdr82	3397.89	-0.0586161	0.0551656	-1.06255	0.287987	0.664177
Nfatc1	3340.25	-0.321821	0.102321	-3.14521	0.00165967	0.0545316
Psmc5	3407.38	0.0984628	0.0758342	1.2984	0.194151	0.575293
Selenot	3263.61	-0.0992399	0.0728702	-1.36187	0.173238	0.551009
Rbm28	3382.62	0.062901	0.058106	1.08252	0.279021	0.656772
H13	3397.9	-0.0192631	0.0565649	-0.340549	0.733443	0.916647
Dnmt3a	3298.8	-0.362537	0.124146	-2.92024	0.00349762	0.0819191
Arpc3	3439.66	0.0900579	0.0623432	1.44455	0.148584	0.521464
Kcnab2	3405.81	-0.158821	0.112866	-1.40717	0.159378	0.534685
Sf3a1	3379.51	-0.247878	0.0575002	-4.31091	1.62583e-05	0.00281756
Farsb	3401.91	0.228122	0.0610653	3.73572	0.000187182	0.0146184
Zc3h15	3377.27	0.127573	0.0527464	2.41861	0.0155801	0.17802
Ifrd2	3373.89	-0.0686213	0.0648005	-1.05896	0.289617	0.665659
Pebp1	3483.61	-0.0262417	0.11018	-0.238171	0.811748	0.942059
Gm4204	3374.89	-0.0594032	0.0521208	-1.13972	0.254403	0.633937
Wapl	3329.91	0.0689853	0.0629536	1.09581	0.273161	0.653487
Rab7	3353.35	0.0754731	0.0611781	1.23366	0.217329	0.597805
Serpinb6b	3197.11	0.205401	0.234946	0.874249	0.381983	0.737225
Nefh	3358.09	-0.197129	0.0878957	-2.24276	0.0249123	0.224692
Ptpn11	3337.78	-0.0858135	0.0804691	-1.06642	0.286235	0.662025
Gnb2	3412.6	-0.0910502	0.0657638	-1.3845	0.166204	0.543496
Rnf213	3602.08	0.86295	0.350757	2.46025	0.0138839	0.173508
Rps27l	3289.49	-0.390556	0.16151	-2.41816	0.0155991	0.17802
Trp53	3343.71	-0.155632	0.0578036	-2.69243	0.00709337	0.121883
Ubqln1	3315.65	-0.0947621	0.0611979	-1.54845	0.121514	0.480157
Npm3	3330.7	-0.200249	0.0912901	-2.19354	0.0282684	0.237482
Il21r	3349.65	0.283089	0.122857	2.30422	0.0212106	0.209
Brd4	3316.27	-0.223874	0.0720956	-3.10524	0.00190127	0.0584269
Tcerg1	3290.98	0.00480193	0.056798	0.084544	0.932624	0.981293
Bcat1	3278.22	0.0765965	0.0869501	0.880925	0.378359	0.734785
Pitpna	3315.52	-0.0175291	0.0681202	-0.257326	0.796927	0.938742
Ndufa4	3349.93	-0.188569	0.1493	-1.26302	0.206582	0.587446
2900097C17Rik	3350.18	0.0253544	0.0711245	0.356479	0.721482	0.910748
Rnf10	3344.31	-0.137863	0.0615406	-2.24019	0.0250786	0.225383
Sae1	3293.53	-0.00706131	0.0619195	-0.11404	0.909206	0.976407
Arhgap30	3385.5	0.143805	0.080334	1.79009	0.0734395	0.381388
Psmb9	3374.57	0.137159	0.0698314	1.96414	0.0495135	0.314299
Psmd6	3315.08	-0.0601949	0.0785155	-0.766663	0.443282	0.77444
Kif5b	3200.89	-0.0620984	0.0646463	-0.960587	0.33676	0.705202
Nrd1	3276.97	-0.0488485	0.0596216	-0.81931	0.41261	0.758274
Htt	3277.89	-0.0539068	0.0724275	-0.744286	0.456704	0.782967
Lnpep	3235.82	0.177135	0.101301	1.7486	0.0803599	0.397249
Upf1	3303.43	-0.350898	0.0811675	-4.32313	1.53828e-05	0.0027852
Ppp4c	3330.57	0.00101093	0.0630689	0.016029	0.987211	0.997628
Dennd2d	3275.06	-0.03644	0.0834543	-0.436646	0.662368	0.888435
Akr1a1	3324.23	0.127915	0.0531192	2.40807	0.0160372	0.179142
Cdk1	3294.76	0.0341262	0.0873962	0.390477	0.696184	0.900809
Hk2	3379.26	0.370234	0.160849	2.30176	0.021349	0.209361
U2af1	3298.24	-0.0561552	0.0617259	-0.909751	0.362954	0.722513
Ptpa	3322.62	-0.16383	0.0669609	-2.44665	0.0144189	0.17531
Polr2b	3284.97	0.0101116	0.0698774	0.144705	0.884944	0.968571
Chordc1	3212.99	0.0031716	0.0708026	0.044795	0.964271	0.991303
Slc35a4	3277.89	-0.0180132	0.0668105	-0.269616	0.787456	0.936233
Rpl21-ps15	3403.16	-0.0561376	0.120971	-0.464058	0.642607	0.879624
Zranb2	3282.09	-0.00743751	0.0808573	-0.0919831	0.926711	0.978836
Cox7c	3264.03	-0.211704	0.158144	-1.33868	0.180675	0.559125
Ahcyl1	3251.33	-0.122158	0.0473341	-2.58077	0.00985799	0.14513
Hmgcs1	3302.58	-0.018849	0.0659688	-0.285726	0.775088	0.931656
Cd4	3198.49	-0.272327	0.118597	-2.29624	0.0216621	0.21107
Prps1	3255.54	0.148528	0.0656287	2.26316	0.0236257	0.220295
Usp34	3118.08	-0.0363482	0.105974	-0.342993	0.731603	0.915618
Ppp4r3b	3158.91	-0.113056	0.0688724	-1.64152	0.100689	0.4371
Dnajc8	3301.25	0.0739917	0.067547	1.09541	0.273337	0.653627
Psmc2	3245.62	0.0869151	0.0656972	1.32296	0.185847	0.565697
Coro1c	3284.64	-0.150597	0.0735998	-2.04616	0.0407409	0.284858
Rrp1b	3235.6	-0.0934923	0.0656108	-1.42495	0.154171	0.528766
Aprt	3332.08	0.17318	0.0666162	2.59967	0.00933139	0.141487
Setx	3212.88	0.140889	0.0799129	1.76303	0.0778954	0.392258
Tufm	3305.8	-0.0413832	0.0733046	-0.564537	0.572389	0.848545
Elmo1	3178.75	-0.0417608	0.0746747	-0.559236	0.576001	0.85047
Sptbn1	3224.61	-0.0888759	0.091492	-0.971406	0.331346	0.701493
St6galnac4	3261.54	-0.0922925	0.0693231	-1.33134	0.183078	0.56265
Prelid3b	3222.96	0.0335029	0.0858721	0.390149	0.696427	0.900809
Nip7	3240.55	-0.0986007	0.145384	-0.67821	0.497639	0.808205
Wbp11	3251.84	-0.17715	0.0724987	-2.4435	0.0145457	0.17531
Rbm17	3292.17	-0.0277729	0.0606182	-0.45816	0.646837	0.881166
Timm50	3260.58	0.056218	0.0709062	0.79285	0.427865	0.765283
Ctps	3211.52	-0.00712464	0.0743538	-0.0958208	0.923663	0.978295
Bhlhe40	3147.22	0.460173	0.139424	3.30053	0.000965016	0.0412205
Fmnl1	3174.74	-0.363461	0.0822873	-4.41698	1.00091e-05	0.00216821
Cd74	3587.33	0.96198	0.994891	0.966919
Cpsf1	3218.87	-0.256495	0.0644922	-3.97715	6.97466e-05	0.00783422
Smg5	3215.29	-0.174259	0.0765888	-2.27526	0.0228903	0.21677
Atp5j2	3218.53	-0.251867	0.163109	-1.54417	0.122548	0.481734
Tpp2	3137.35	-0.0477941	0.0729582	-0.655089	0.51241	0.815251
Gimap6	3212.53	-0.130645	0.111618	-1.17047	0.241813	0.622545
Elavl1	3231.69	0.136147	0.0617439	2.20503	0.0274518	0.235232
Kmt2d	3242.41	-0.191177	0.0850779	-2.24708	0.0246347	0.224558
Gtf2i	3195.22	-0.148107	0.0835857	-1.77192	0.0764084	0.387007
Parvg	3209.93	0.0410268	0.0655959	0.625447	0.531678	0.828584
Psmd14	3177.36	-0.0439078	0.0538243	-0.815762	0.414636	0.758512
Polr1b	3176.12	-0.134808	0.0654783	-2.05881	0.0395123	0.281329
Lsp1	3284.33	0.286654	0.260487	1.10045	0.271134	0.651659
Cherp	3171.35	-0.250838	0.0678598	-3.69642	0.000218664	0.0157893
Ppig	3188.92	-0.143744	0.0687691	-2.09024	0.0365961	0.272193
Psma5	3213.04	0.177944	0.0682029	2.60904	0.00907977	0.13978
Wdr75	3116.68	0.0232193	0.066332	0.350046	0.726304	0.913599
Psmb2	3197.52	0.0787319	0.077707	1.01319	0.31097	0.682166
Nfkbia	3160.71	0.258612	0.0944031	2.73944	0.00615437	0.112438
Copb1	3124.1	0.0467675	0.0610122	0.766527	0.443363	0.77444
Myo9b	3155.39	-0.104358	0.0718399	-1.45265	0.14632	0.518625
Acsl4	3111.86	0.03085	0.0649407	0.475049	0.634752	0.877995
Idh3a	3109.9	-0.0590407	0.0506142	-1.16649	0.243418	0.624689
Sh3kbp1	3122.24	-0.16853	0.126698	-1.33017	0.183463	0.562677
Wdr3	3142.67	0.0789841	0.069787	1.13179	0.257724	0.638524
Fxyd5	3215.36	0.0847429	0.0628664	1.34798	0.177664	0.556477
Uhmk1	3089.29	0.105689	0.0768199	1.37581	0.168882	0.546343
Supt5	3179.52	-0.10107	0.0627014	-1.61192	0.106979	0.452505
Nmt1	3147.49	0.0856846	0.060285	1.42133	0.155222	0.529936
Srebf1	3230.79	-0.064283	0.0708252	-0.907629	0.364074	0.723793
Psmb6	3179.09	0.0898669	0.0871265	1.03145	0.302328	0.677221
Glyr1	3164.1	0.0187467	0.0646156	0.290126	0.77172	0.931145
Pdcd6ip	3061.65	-0.344824	0.0704723	-4.89305	9.92865e-07	0.000547475
Smc6	3094.93	-0.144554	0.0683261	-2.11565	0.0343742	0.265187
Rrp12	3158.06	0.0353693	0.0701189	0.504419	0.613967	0.865811
Ap2b1	3118.61	0.0805662	0.0687033	1.17267	0.240929	0.622383
Snrpg	3246.28	0.0293177	0.104522	0.280492	0.7791	0.932905
Ube2n	3108.52	-0.0371591	0.0471318	-0.788409	0.430457	0.767519
Tyms	3103.43	-0.184237	0.0989948	-1.86108	0.0627325	0.353793
Ccl3	2921.14	-0.143421	0.352917	-0.406388	0.684457	0.89643
Rbmxl1	3136.16	-0.0844419	0.0772717	-1.09279	0.274485	0.654824
Taf10	3178.3	-0.241426	0.0836196	-2.8872	0.00388693	0.086518
Tnpo3	3096.32	0.0604513	0.0611539	0.988511	0.322902	0.694224
Hcls1	3180.26	-0.102675	0.0879111	-1.16794	0.24283	0.623973
Surf4	3130.11	0.0794349	0.0779547	1.01899	0.308209	0.680689
Hk1	3203.71	0.0843016	0.112517	0.749237	0.453714	0.781167
Sms	3046.12	-0.121643	0.0786174	-1.54728	0.121796	0.480409
Prdx6	3111.79	-0.0276314	0.0749573	-0.368629	0.712404	0.906686
Pdha1	3118.54	-0.0313935	0.0667028	-0.470647	0.637893	0.878647
Sbf1	3086.68	-0.405161	0.0684758	-5.91686	3.2815e-09	9.95196e-06
Me2	3101.97	-0.0150743	0.0721709	-0.20887	0.83455	0.95003
Npepl1	3089.49	-0.142084	0.103079	-1.3784	0.16808	0.54507
Cblb	3064.42	-0.192621	0.0780197	-2.46888	0.0135536	0.172638
Qars	3108.38	0.0686986	0.0775716	0.885616	0.375824	0.732541
Wdr18	3108.84	-0.0385275	0.0591068	-0.651829	0.514511	0.816769
Fnbp4	3081.2	0.087594	0.0579306	1.51205	0.130521	0.492145
Sdad1	3099.56	0.031009	0.0635082	0.488268	0.62536	0.873086
Msh6	3104.25	-0.0984444	0.0669269	-1.47093	0.141311	0.511082
Nfatc3	3028.05	0.00952008	0.0787611	0.120873	0.903792	0.974627
Arih1	3022.39	0.00442738	0.0522464	0.0847405	0.932468	0.981246
Tgfb1	3084.5	-0.282942	0.0639433	-4.42488	9.64938e-06	0.0021283
Sema4d	3102.73	-0.064092	0.117427	-0.545804	0.5852	0.854894
Chd1	3037.61	-0.015839	0.0757011	-0.20923	0.834268	0.95003
Smyd5	3090.95	-0.0922484	0.0662292	-1.39286	0.163661	0.54053
Galk1	3186.22	-0.05661	0.0774513	-0.730912	0.464833	0.788877
Larp4b	3018.97	0.0754148	0.0682795	1.1045	0.269376	0.650179
Eif3j1	3045.55	-0.110239	0.0782605	-1.40861	0.158949	0.534279
Zfp36l2	3113.24	-0.166317	0.0913249	-1.82116	0.0685822	0.369929
Gatad2a	3087.19	-0.121906	0.0591676	-2.06035	0.0393655	0.281239
Mapk1ip1l	3034.24	-0.00998914	0.05837	-0.171135	0.864118	0.9596
Mbd3	3073.27	-0.22531	0.0746316	-3.01896	0.0025364	0.0674761
Sar1a	3058.53	0.0837508	0.0594672	1.40835	0.159026	0.53439
Psmd11	3036.07	0.034419	0.0609146	0.565038	0.572048	0.848545
Hspa14	3016.88	-0.0445647	0.0725176	-0.614537	0.53886	0.830401
Ankrd13a	3027.83	-0.18317	0.0698944	-2.62066	0.00877594	0.137903
Atad3a	3059.69	-0.0837712	0.073024	-1.14717	0.25131	0.631397
D17Wsu92e	3112.37	0.0418961	0.0658226	0.6365	0.524451	0.823196
Mta1	3026.99	-0.315944	0.0687438	-4.59596	4.3076e-06	0.00116123
Kcnn4	3036.07	-0.191662	0.119682	-1.60142	0.109283	0.457931
Hadha	3035.4	-0.0665516	0.0657436	-1.01229	0.3114	0.682738
Slc6a6	3031.42	-0.0947094	0.0915299	-1.03474	0.300792	0.675895
Xpo4	2942.87	0.0161427	0.0743418	0.217141	0.828098	0.94842
Nol9	3036.91	-0.0937034	0.0698768	-1.34098	0.179927	0.55808
Zfp280b	3023.64	-0.126068	0.121431	-1.03819	0.299183	0.67439
Wasf2	3053.43	-0.0368848	0.0765671	-0.481731	0.629997	0.874827
Atp13a1	3067.36	-0.0824381	0.0581111	-1.41863	0.156007	0.531611
Nup50	3026.3	-0.0844462	0.0546741	-1.54454	0.122458	0.481693
Rel	2934.71	0.17749	0.122998	1.44303	0.149013	0.522451
Nop10	3116.53	-0.022181	0.121436	-0.182656	0.855068	0.957593
Cox6c	3007.27	-0.196527	0.162205	-1.2116	0.225666	0.605788
Sdhb	3005.2	-0.0266007	0.0762888	-0.348685	0.727326	0.914131
Adam10	2993.13	-0.212614	0.103256	-2.0591	0.0394848	0.281329
Safb	3059.85	-0.0950189	0.0656426	-1.44752	0.147751	0.51998
Acaca	3000.19	-0.217969	0.0947785	-2.29977	0.0214614	0.209958
Zc3h12d	2998.03	-0.222286	0.0972076	-2.28671	0.0222127	0.21454
Psmd13	3048.02	-0.0453823	0.0787436	-0.57633	0.564392	0.844118
Gfi1	3101.97	0.107101	0.130082	0.823334	0.410318	0.756242
Mcmbp	3004.94	-0.00486876	0.0518562	-0.0938895	0.925197	0.978405
Sp1	2984.32	0.0582943	0.0669264	0.871021	0.383743	0.73837
Idi1	2963.51	-0.317781	0.0902748	-3.52015	0.000431305	0.0241114
Nat10	3008.73	-0.0713581	0.0634633	-1.1244	0.260843	0.640545
Spcs2	3014.15	0.151633	0.0597852	2.53629	0.0112032	0.156613
Dusp11	2972.46	0.0450969	0.0718803	0.627389	0.530404	0.828128
Aes	3076.5	-0.0597329	0.0744663	-0.802147	0.422468	0.763492
Tmed5	2916.29	-0.0937979	0.079958	-1.17309	0.24076	0.622383
Prkcsh	3017.49	-0.0635543	0.0976003	-0.651169	0.514938	0.816777
Smg7	2985.44	0.0778702	0.086108	0.904331	0.36582	0.72548
Ints7	2959.95	-0.188677	0.0794833	-2.37379	0.0176067	0.189015
Ipo9	2947.88	-0.131042	0.0631343	-2.07561	0.0379298	0.276352
Map4k1	2992.1	-0.0936032	0.0815115	-1.14834	0.250826	0.630889
Hars	2998.81	0.114594	0.0919559	1.24618	0.212698	0.593199
Stk17b	2963.3	-0.0186263	0.0820658	-0.226968	0.820449	0.945371
Dynll1	2953.89	0.110382	0.0707848	1.5594	0.118902	0.475715
Tomm5	2992.91	-0.171947	0.146625	-1.1727	0.240918	0.622383
Otud5	3040.65	0.00694502	0.0869172	0.0799039	0.936314	0.98334
Nol11	2895.37	0.000388096	0.0806039	0.00481485	0.996158	0.999212
Cul1	2956.57	-0.00160838	0.0567071	-0.0283629	0.977373	0.995839
Gapvd1	2934.54	-0.00176886	0.0721221	-0.0245259	0.980433	0.996208
Cntrl	2930.96	0.00349469	0.0819044	0.0426679	0.965966	0.991802
Ddx23	2989.61	-0.0327003	0.0675271	-0.484255	0.628205	0.87384
Senp3	2984.77	-0.119615	0.0634984	-1.88375	0.0595983	0.344444
Ptprs	2971.29	-0.428438	0.110977	-3.86058	0.000113117	0.0101702
Nabp1	2970.53	0.288929	0.11127	2.59666	0.0094136	0.141778
Cd3d	2984.48	-0.13769	0.103891	-1.32533	0.185062	0.564789
Sumo1	2947.9	-0.165537	0.129598	-1.27731	0.201492	0.581623
Gm12191	3063.82	-0.363189	0.88422	-0.410745	0.68126	0.895089
Sf3b4	2996.52	-0.234129	0.0711277	-3.29168	0.000995916	0.0420495
Thap12	2943.82	-0.129461	0.0584614	-2.21447	0.0267968	0.231552
Fam111a	2988.1	0.0724878	0.0950731	0.762443	0.445795	0.776079
Chd3	2947.76	-0.326941	0.0999003	-3.27268	0.00106535	0.0426526
Dusp2	2980.5	-0.0865251	0.129241	-0.669487	0.503185	0.810821
Psmd12	2924.28	0.0239118	0.0629645	0.379766	0.704119	0.903678
Tcea1	2876.7	-0.167158	0.0729805	-2.29045	0.0219952	0.212948
Cstf2	2881.64	-0.0706965	0.0686863	-1.02927	0.303354	0.677465
Dock8	2895.09	-0.161419	0.0915875	-1.76246	0.0779914	0.392415
Fignl1	2923.63	-0.0893668	0.0909604	-0.982481	0.325863	0.696198
Atp5e	3022.65	-0.102453	0.106533	-0.961699	0.336201	0.705005
Fgfr1op2	2868.95	-0.162673	0.0458513	-3.54783	0.000388412	0.022653
Eed	2923.5	0.0622975	0.0737893	0.844263	0.398523	0.748645
Rer1	2930.54	0.0626946	0.0680189	0.921723	0.356673	0.718162
Max	2965.66	-0.016924	0.0743631	-0.227586	0.819968	0.945086
Ndufs2	2952.17	-0.00603109	0.0580164	-0.103955	0.917205	0.976849
Tsn	2911.16	-0.0391107	0.0573481	-0.681987	0.495247	0.806899
Picalm	2845.52	0.225222	0.123597	1.82223	0.06842	0.369219
Usp15	2922.02	0.13597	0.0645221	2.10734	0.0350885	0.26716
Rbm38	2937.22	-0.348555	0.0652109	-5.34504	9.03987e-08	9.1171e-05
Rbm10	2944.55	-0.0677818	0.0633731	-1.06957	0.284814	0.661132
Ociad1	2928.12	0.0988164	0.053566	1.84476	0.0650725	0.360678
Ccnb1	2836.38	0.0749272	0.164712	0.4549	0.649181	0.881825
Dnttip2	2900.02	-0.061726	0.0831686	-0.742179	0.457979	0.784044
Jund	3013.6	-0.124337	0.0837937	-1.48384	0.13785	0.504594
Diaph1	2899.24	-0.105064	0.068712	-1.52905	0.126253	0.486392
Utp6	2898.78	0.03576	0.064533	0.554135	0.579486	0.85133
Nifk	2944.25	0.0301689	0.0761837	0.396001	0.692104	0.899572
Lrrfip1	2892.74	0.0107831	0.0819597	0.131566	0.895328	0.972269
Rsrp1	2907.43	-0.101505	0.0827393	-1.22681	0.219894	0.599801
Nras	2872.83	0.102529	0.0668184	1.53444	0.124922	0.484649
Grap	2893.1	-0.00673073	0.0752725	-0.0894182	0.92875	0.97942
Dgkd	2881.34	-0.128314	0.0651362	-1.96993	0.0488466	0.312273
Sdhd	2965.37	0.0601678	0.0672323	0.894925	0.370827	0.729256
Rfc2	2907.95	-0.00865287	0.058888	-0.146938	0.883181	0.968267
Cdc34	2930.17	-0.102985	0.0805019	-1.27928	0.200798	0.580387
Atad1	2851.51	0.02117	0.0956416	0.221347	0.824822	0.946813
Clta	2951.23	-0.022944	0.0708904	-0.323655	0.746199	0.921456
Dld	2863.62	0.000733709	0.0878839	0.00834862	0.993339	0.998799
Tpx2	2890.83	0.13546	0.148285	0.91351	0.360974	0.721413
Cnot9	2908.54	0.0110222	0.0755322	0.145927	0.883979	0.96835
Psap	2908.75	-0.04932	0.0800681	-0.615976	0.53791	0.829885
Ppp6r3	2843.73	-0.0231438	0.0816508	-0.283449	0.776833	0.932335
Nup93	2856.85	-0.0838048	0.0746735	-1.12228	0.261742	0.641342
Rnf187	2929.9	-0.167997	0.091019	-1.84573	0.0649308	0.360657
Nudt21	2933.65	0.0200187	0.0753503	0.265675	0.790489	0.936742
Arhgap45	2926.95	-0.0617201	0.0771739	-0.799753	0.423854	0.763691
Cul3	2806.85	-0.182952	0.0546775	-3.34601	0.000819825	0.0378987
Sltm	2887.99	0.0972411	0.0651045	1.49361	0.135276	0.499611
Seh1l	2858.04	0.0776618	0.0630836	1.23109	0.218288	0.598295
Helz2	3010.78	0.391551	0.125317	3.12447	0.00178125	0.0565665
Arhgef2	2847	-0.0931909	0.074029	-1.25884	0.208087	0.589285
Elp2	2857.12	0.00385627	0.0633664	0.0608566	0.951473	0.988551
Ccni	2901.2	-0.0345021	0.0867704	-0.397626	0.690906	0.899055
Adh5	2858.87	-0.117306	0.104211	-1.12565	0.260312	0.639952
Taf15	2936.7	0.136839	0.0893541	1.53142	0.125665	0.485181
Ctsb	2846.65	0.0508147	0.0556122	0.913732	0.360858	0.721413
Trim27	2864.62	-0.162391	0.0541796	-2.99726	0.00272414	0.0707636
Sf3a3	2859.53	0.0568718	0.0636331	0.893747	0.371457	0.729387
Dis3	2800.75	-0.0784945	0.0617556	-1.27105	0.203711	0.584904
Zfp91	2826.95	0.0288885	0.0667384	0.432861	0.665116	0.889671
Tmed10	2867.64	0.0185421	0.0588924	0.314848	0.752877	0.923941
Pola1	2794.28	-0.194737	0.099812	-1.95104	0.0510522	0.320224
Mdfic	2760.33	-0.0358468	0.108971	-0.328957	0.742188	0.919597
Cdk2ap1	2905.53	-0.0425246	0.0869872	-0.48886	0.624941	0.872802
Usp9x	2748.75	0.0444576	0.0985877	0.450945	0.652029	0.883181
Ankrd52	2852.44	-0.290037	0.104595	-2.77296	0.00555489	0.105456
Ruvbl1	2860.95	0.0233744	0.066462	0.351696	0.725066	0.912931
Incenp	2883.38	-0.191764	0.10876	-1.76319	0.0778685	0.392258
Snrpa	2854.95	0.0605163	0.0649565	0.931644	0.35152	0.714079
Dcun1d5	2861.01	-0.126466	0.106586	-1.18651	0.235421	0.617073
Pbrm1	2780.91	-0.00626847	0.0616092	-0.101746	0.918958	0.976849
Lrp10	2861.05	-0.148885	0.065256	-2.28155	0.0225157	0.215478
Galnt1	2791.22	-0.13006	0.0561495	-2.31632	0.020541	0.205103
Gemin5	2794.8	-0.091653	0.0727024	-1.26066	0.207432	0.58852
Slc19a1	2826.67	-0.192889	0.0846929	-2.27751	0.0227556	0.215831
Nfat5	2680.87	0.0969335	0.124436	0.77898	0.435991	0.769983
Efhd2	2828.75	-0.0641303	0.0923693	-0.694281	0.487506	0.801047
Yy1	2792.3	-0.138498	0.0562829	-2.46075	0.0138648	0.173508
Plaa	2788.79	0.00415132	0.0521938	0.0795366	0.936606	0.983464
Phc2	2855.06	-0.277885	0.109406	-2.53994	0.0110871	0.155865
Gmfb	2757.72	-0.0679779	0.0623602	-1.09008	0.275676	0.656116
Cox7a2	2832.8	-0.240243	0.159555	-1.50571	0.132142	0.494348
Zfp706	2794.84	-0.144874	0.0577071	-2.51051	0.0120557	0.161996
Dtl	2784.88	0.00150256	0.0714679	0.0210243	0.983226	0.996719
Rpl3-ps1	2839.25	0.20476	0.0933162	2.19426	0.0282167	0.23743
Btaf1	2749.91	-0.100279	0.0921027	-1.08878	0.276253	0.656717
Ik	2854.51	0.132104	0.0591358	2.23391	0.0254893	0.227194
Usp4	2785.95	8.98716e-05	0.0629304	0.00142811	0.998861	0.99977
Wars	2812.72	0.0548419	0.0652187	0.840892	0.400408	0.750086
Dnajc7	2844.74	0.198246	0.0643773	3.07944	0.00207389	0.0603318
AU020206	2811.33	0.256065	0.112291	2.28037	0.0225855	0.215478
Prep	2787.14	-0.0882439	0.0591336	-1.49228	0.135626	0.499988
Mad2l1	2733.18	-0.155398	0.116186	-1.33749	0.181061	0.559503
Ints1	2798.48	-0.256644	0.0758445	-3.38382	0.000714861	0.0342766
Luc7l	2760.1	0.0242308	0.0568512	0.426214	0.669952	0.890713
Psmd4	2822.62	0.124131	0.0687903	1.80448	0.0711563	0.375973
Pom121	2773.38	-0.322081	0.0985539	-3.26807	0.00108284	0.042788
Cpsf2	2754.8	-0.0144614	0.0647922	-0.223197	0.823382	0.946028
Copg1	2784.45	0.112898	0.0697389	1.61887	0.105475	0.448797
Eif2a	2804.88	0.0019522	0.0639471	0.0305283	0.975646	0.995099
Ccdc88b	2808.5	-0.143308	0.100702	-1.42309	0.154709	0.52945
Nop14	2792.68	0.0820916	0.102428	0.801459	0.422866	0.763492
Osbpl8	2724.72	0.0449545	0.0533533	0.842582	0.399462	0.749663
Traf1	2790.49	0.341655	0.22399	1.52531	0.127181	0.487466
Xpo7	2713.78	-0.129667	0.0734809	-1.76463	0.0776254	0.391548
Dgka	2750.83	-0.121656	0.12132	-1.00277	0.315973	0.686974
Gpx4	2823.29	0.0227841	0.136617	0.166774	0.867548	0.960427
Atp5h	2751.16	-0.0271614	0.0871121	-0.311798	0.755194	0.924456
Bag1	2787.42	-0.154742	0.0678981	-2.27903	0.0226655	0.215495
Pno1	2708.88	-0.0347148	0.0653081	-0.531554	0.595035	0.858117
Bptf	2772.55	-0.0732407	0.117822	-0.62162	0.534192	0.828855
Mapk6	2722.29	0.0733152	0.0910034	0.805631	0.420456	0.762817
Hnrnpr	2770.38	-0.14414	0.0662106	-2.17699	0.0294811	0.242959
Lamp1	2739.56	-0.0310055	0.0517437	-0.599214	0.54903	0.83744
Jade2	2720.87	-0.395473	0.124366	-3.17992	0.00147317	0.0507698
Nup88	2707.71	-0.00569984	0.0510633	-0.111623	0.911122	0.976407
Coa5	2711.71	0.130236	0.0817841	1.59244	0.111286	0.461284
Csnk1d	2764.57	-0.11111	0.0574121	-1.9353	0.0529536	0.324351
Hipk3	2684.62	-0.0174621	0.0768938	-0.227093	0.820351	0.945371
Rfc5	2746.31	-0.183984	0.0677694	-2.71486	0.00663048	0.117081
Foxk2	2742.21	-0.0882156	0.06049	-1.45835	0.144744	0.516364
Zc3h18	2749.12	-0.248668	0.0772067	-3.22081	0.00127827	0.0466884
Cish	2793.04	0.209201	0.131847	1.58669	0.112583	0.46454
Kmt2a	2670.56	-0.26153	0.0933068	-2.80291	0.00506444	0.100551
Zwint	2726.58	0.130982	0.073552	1.78081	0.0749434	0.382634
Ptk2b	2730.65	-0.210018	0.0923724	-2.2736	0.02299	0.216915
Tmem173	2757.58	0.179462	0.109119	1.64464	0.100044	0.43596
Naa25	2753.72	0.254678	0.103522	2.46014	0.0138881	0.173508
Smu1	2730.96	0.0788067	0.0694293	1.13506	0.256348	0.636334
Ppp4r3a	2660.63	-0.08883	0.0800497	-1.10969	0.267135	0.64657
Usp36	2747.97	-0.0570587	0.0553962	-1.03001	0.303004	0.677357
Got1	2742.88	0.140151	0.0615045	2.2787	0.0226847	0.215495
Nsmce4a	2712.17	-0.129081	0.074359	-1.73592	0.0825788	0.402638
Ero1l	2788.71	0.623696	0.1607	3.88111	0.000103981	0.00983916
Gm15500	2774.45	-0.109812	0.27485	-0.399534	0.6895	0.89852
Ms4a6b	2729.54	-0.115657	0.155509	-0.743732	0.457038	0.783098
Cdc42se1	2742.91	0.1219	0.0798497	1.52662	0.126857	0.487148
Trnt1	2731	0.0608082	0.0980929	0.619904	0.535321	0.829053
Mcm10	2728.73	0.0416904	0.0646371	0.644992	0.518933	0.819577
Samm50	2750.07	0.0443254	0.0645727	0.686441	0.492435	0.804868
Usp19	2711.57	-0.107377	0.0561965	-1.91074	0.0560385	0.332911
Tbl3	2709.85	-0.00806621	0.0739116	-0.109133	0.913097	0.976708
Fh1	2699.91	-0.0971631	0.0692848	-1.40237	0.160804	0.536469
Utp15	2667.51	0.0756822	0.0675215	1.12086	0.262347	0.641563
Pold2	2725.71	-0.107121	0.0494855	-2.1647	0.0304105	0.248257
Tgoln1	2697.43	0.181855	0.0817195	2.22536	0.0260573	0.229618
Prkch	2674.19	-0.167758	0.113897	-1.47289	0.140781	0.510739
Cdt1	2737.41	-0.281405	0.0865777	-3.25031	0.00115279	0.0442726
Ilf2	2711.17	0.0971346	0.0586806	1.65531	0.0978613	0.431291
Cbl	2664.91	0.0889839	0.0851411	1.04513	0.295961	0.670835
Tcf3	2752.3	-0.149683	0.0880659	-1.69968	0.089192	0.415179
Dnajc9	2711.61	-0.102513	0.0617626	-1.65979	0.0969571	0.429928
Prim1	2664.89	-0.0912872	0.0715148	-1.27648	0.201786	0.581765
Ola1	2683.99	-0.0959991	0.0590499	-1.62573	0.104008	0.445521
Nfe2l1	2757.5	0.163065	0.0868886	1.87671	0.060558	0.347342
Gnl2	2656.86	-0.00658568	0.0555734	-0.118504	0.905668	0.975169
Ube2d2a	2677.08	-0.109747	0.0515319	-2.12969	0.033197	0.260319
Slc29a1	2670.01	-0.126266	0.104052	-1.21349	0.224944	0.604921
Taf1	2653.6	0.0683648	0.0838425	0.815396	0.414846	0.758512
Zfas1	2689.31	0.0995834	0.108126	0.920997	0.357052	0.718162
Uggt1	2642.22	-0.0226332	0.0728526	-0.310672	0.75605	0.924654
Oat	2662.1	0.111542	0.0611234	1.82486	0.0680222	0.368383
Bach2	2618.08	-0.21023	0.110797	-1.89744	0.0577705	0.338482
Epb41	2700.05	0.00785757	0.0840976	0.0934339	0.925559	0.978471
Heatr3	2654.02	-0.107236	0.0667842	-1.60571	0.108338	0.456493
Nol6	2668.73	-0.198368	0.0836605	-2.3711	0.0177351	0.189599
Cmtm6	2662.95	-0.000880281	0.0626787	-0.0140443	0.988795	0.997874
Sash3	2701.59	0.112256	0.0908366	1.2358	0.216534	0.597129
Ldb1	2710.56	-0.155518	0.0620715	-2.50547	0.0122289	0.1632
Sf3b5	2749.24	0.059503	0.0872684	0.681839	0.495341	0.806899
Espl1	2646.62	-0.204812	0.108384	-1.88968	0.0588012	0.342177
Ncln	2664.11	-0.131193	0.0586657	-2.23628	0.0253332	0.226802
Mphosph10	2633.17	-0.133554	0.10501	-1.27183	0.203435	0.584527
Rtraf	2690.27	0.0603737	0.0691319	0.873311	0.382494	0.737516
Rbm8a	2718.51	0.0786013	0.0831313	0.945508	0.3444	0.709755
Rps16-ps2	2729.11	0.000149874	0.0960778	0.00155993	0.998755	0.99977
Eri1	2622.96	-0.0586042	0.0462073	-1.26829	0.204695	0.586203
Senp1	2613.87	-0.0549654	0.0945545	-0.581309	0.561032	0.842938
Cebpz	2596.78	-0.0117302	0.0566238	-0.20716	0.835885	0.950517
Mrto4	2657.79	-0.0346818	0.0748378	-0.463426	0.643059	0.879624
Arpc4	2619.44	-0.327642	0.0590289	-5.55055	2.84779e-08	3.8385e-05
Hnrnpll	2558.66	-0.362378	0.12359	-2.9321	0.00336681	0.0805577
Uchl5	2637.33	0.145387	0.0905934	1.60483	0.108531	0.456832
Thumpd1	2627.4	-0.00864603	0.0841892	-0.102698	0.918203	0.976849
Kmt5a	2625.69	-0.232246	0.0734811	-3.16062	0.00157436	0.0523249
Dynll2	2637.4	-0.380186	0.097693	-3.89164	9.95684e-05	0.00958622
Erbin	2589.63	-0.0566161	0.0673504	-0.84062	0.400561	0.750099
Lsm4	2650.54	-0.195294	0.0901238	-2.16696	0.0302381	0.247349
Pola2	2656.95	-0.06486	0.0595208	-1.0897	0.275844	0.656387
Szrd1	2689.19	-0.10127	0.0838691	-1.20748	0.227247	0.608
Selplg	2659.13	0.108819	0.108014	1.00745	0.313718	0.685467
Eps15	2592.26	0.0412293	0.0691779	0.595989	0.551183	0.838161
Cd247	2693.15	0.0427357	0.0952873	0.448493	0.653797	0.884489
Snrpd3	2686.84	0.0553132	0.0743515	0.743942	0.456912	0.783098
Isg20l2	2632.07	-0.00677618	0.0622825	-0.108797	0.913363	0.976815
Nvl	2588.9	-0.0249694	0.0694807	-0.359372	0.719317	0.910194
Mgea5	2623.07	0.123006	0.0802752	1.53231	0.125447	0.484958
Stoml2	2637.66	0.0105714	0.0760311	0.139041	0.889418	0.969795
Dhx30	2603.93	-0.0486824	0.0564756	-0.862008	0.388683	0.742084
Otulin	2630.34	0.232293	0.111409	2.08506	0.0370642	0.274083
Polr1d	2678.04	0.0256383	0.0879567	0.291488	0.770678	0.930536
Cflar	2640.99	0.600681	0.138267	4.34435	1.39692e-05	0.00264781
Wdr12	2591.2	-0.0597298	0.0811946	-0.735637	0.461951	0.787069
Naa20	2609.46	-0.105003	0.132099	-0.79488	0.426683	0.765283
Ikzf3	2724.77	0.135238	0.279602	0.483683	0.628611	0.873897
Nme1	2601.37	0.0736716	0.106076	0.694517	0.487358	0.801047
Gps1	2606.75	-0.022603	0.0709741	-0.318468	0.75013	0.922903
Dtymk	2602.07	-0.132932	0.072371	-1.83681	0.0662386	0.363747
Man1a	2593.05	0.198174	0.109773	1.80531	0.0710259	0.375973
Sh3bgrl3	2647.42	0.0843692	0.0651797	1.29441	0.195524	0.576695
Kif15	2536.32	-0.0489803	0.0804014	-0.609197	0.542394	0.832357
Sec13	2581.21	0.0314508	0.0551302	0.570481	0.568351	0.846284
Timeless	2622.04	-0.0644462	0.052615	-1.22486	0.220627	0.600706
Eml4	2563.91	-0.087457	0.0763626	-1.14529	0.252091	0.631984
Cars	2625.15	0.232696	0.0965423	2.4103	0.0159394	0.178407
Scrib	2612.88	-0.356605	0.0737963	-4.83229	1.34974e-06	0.00059573
Tram1	2580.56	-0.00198594	0.0711085	-0.0279283	0.977719	0.995839
Tdg	2558.81	-0.11617	0.0819489	-1.41759	0.156311	0.531939
Pdk1	2649.62	0.144867	0.125671	1.15275	0.249013	0.629411
Eef1e1	2560.18	-0.0265066	0.132956	-0.199365	0.841978	0.953018
Qrich1	2543.22	-0.122121	0.074381	-1.64182	0.100626	0.437057
Ptcd3	2535.11	0.0498038	0.0732949	0.679499	0.496822	0.807783
Clns1a	2576.96	-0.0130145	0.0565684	-0.230067	0.81804	0.944005
Cox7b	2593.79	-0.204361	0.138006	-1.48081	0.138658	0.505912
Smarcd2	2594.12	-0.0368621	0.0645687	-0.570897	0.56807	0.846125
Atp5g1	2563.24	-0.0970815	0.0623167	-1.55787	0.119263	0.476229
Polr2e	2581.18	0.0459031	0.0695303	0.660189	0.509133	0.814277
Rrp9	2624.47	0.0235826	0.0824674	0.285963	0.774907	0.931656
Sec31a	2538.76	-0.119677	0.0933678	-1.28179	0.199918	0.579678
Psmb7	2598.1	0.0340258	0.0803386	0.42353	0.671909	0.891483
Oxsr1	2554.23	-0.0298894	0.0691361	-0.432327	0.665504	0.889808
Drg1	2533.28	0.00732081	0.0659402	0.111022	0.911599	0.976479
Tax1bp1	2509.62	0.0802567	0.0791327	1.0142	0.310485	0.682166
Poldip3	2584.09	0.011631	0.0575287	0.202178	0.839778	0.952386
Uqcr10	2587.83	-0.0548117	0.104445	-0.524789	0.59973	0.859731
Cox6b1	2646.75	0.0977737	0.088199	1.10856	0.267621	0.647155
Rab5c	2620.61	0.113005	0.0661934	1.7072	0.0877853	0.411804
Tbl1x	2492.89	-0.174003	0.0650988	-2.6729	0.00751976	0.125305
Gtf2h1	2501.95	-0.0321335	0.086743	-0.370445	0.711051	0.906639
Mlf2	2582.52	-0.214704	0.0799915	-2.68409	0.00727282	0.122873
Slc2a1	2634.68	0.395489	0.157653	2.50861	0.0121208	0.162274
Morf4l1	2602.4	0.0921236	0.0846444	1.08836	0.276436	0.656765
Hirip3	2599.91	-0.0238522	0.0724605	-0.329175	0.742023	0.919551
Hipk1	2504.74	-0.00949307	0.0713364	-0.133075	0.894134	0.971756
Pdia4	2560.23	0.182404	0.0738155	2.47108	0.0134704	0.172638
Uqcrh	2591.24	-0.000462097	0.139087	-0.00332237	0.997349	0.999409
Brix1	2521.63	-0.00750814	0.0528847	-0.141972	0.887102	0.969482
Ddx42	2517.86	0.00773637	0.07096	0.109024	0.913183	0.976708
Magoh	2488.9	-0.131939	0.141801	-0.93045	0.352138	0.714207
Ndufv2	2527.5	-0.131628	0.133483	-0.986102	0.324083	0.694849
Usmg5	2539.12	-0.416823	0.233862	-1.78234	0.0746937	0.381973
Timm23	2596.7	-0.0873332	0.106371	-0.821025	0.411632	0.757395
Cfdp1	2561.82	0.0160232	0.0960327	0.166851	0.867487	0.960427
Snx3	2500.19	-0.038252	0.0619817	-0.61715	0.537136	0.829565
Cd8a	2558.06	-0.295348	0.143702	-2.05529	0.0398512	0.282107
Gnpat	2510.84	-0.0271618	0.0661195	-0.410799	0.68122	0.895089
Ankhd1	2506.17	0.0349352	0.0787914	0.443389	0.657485	0.886143
Slc44a2	2534.53	-0.0947963	0.0768663	-1.23326	0.217478	0.597805
Hp1bp3	2508.17	-0.0665479	0.0824152	-0.80747	0.419396	0.762314
Dnajc5	2543.78	0.0831794	0.0971804	0.855927	0.392038	0.74341
Eea1	2418.84	0.0165336	0.0951523	0.173759	0.862055	0.959012
Iars2	2505.54	0.00210962	0.0732402	0.0288041	0.977021	0.995839
Ube2m	2512.24	-0.125134	0.0668132	-1.8729	0.0610823	0.349128
Idh3b	2505.34	0.00434624	0.0698206	0.0622486	0.950365	0.987995
Nedd8	2536.29	0.0825098	0.0865604	0.953205	0.340486	0.706904
Ehmt2	2563.76	-0.202412	0.0693902	-2.91701	0.00353403	0.0824864
Add1	2537	-0.0604719	0.0752965	-0.803117	0.421907	0.763492
Usp39	2499.58	0.00173575	0.0705883	0.0245898	0.980382	0.996208
Mtch2	2497.63	0.0800078	0.0612065	1.30718	0.191152	0.571853
Kntc1	2470.9	-0.0155654	0.106238	-0.146514	0.883516	0.96835
Sp3	2466.9	-0.228929	0.0783014	-2.92368	0.00345917	0.0814819
Nploc4	2506.97	-0.0265925	0.0797278	-0.333541	0.738726	0.918531
Adrm1	2542.19	-0.052618	0.0564193	-0.932622	0.351015	0.713858
Eif2b5	2512.29	-0.000880311	0.0482639	-0.0182395	0.985448	0.997461
Sipa1	2545.7	-0.187474	0.0609832	-3.07419	0.00211075	0.0608207
Ugcg	2499.78	0.0372529	0.0911698	0.40861	0.682826	0.895663
Pold3	2495.04	-0.0224355	0.053586	-0.418682	0.675448	0.892578
Pwp1	2492.06	0.00788089	0.0595908	0.13225	0.894786	0.971866
Atp11a	2438.73	0.0208357	0.1319	0.157966	0.874484	0.963794
Zfr	2471.26	-0.012236	0.06824	-0.179308	0.857696	0.957893
Bmi1	2429.26	-0.22576	0.0979107	-2.30578	0.0211231	0.208838
Birc3	2509.61	0.314501	0.0965935	3.25593	0.00113024	0.0438047
Tomm22	2480.64	0.0905194	0.0683513	1.32433	0.185395	0.565054
Wdhd1	2506.58	0.017375	0.0544194	0.31928	0.749514	0.922903
Gm9616	2509.89	0.116632	0.103344	1.12858	0.259076	0.638801
Rad51	2525.63	0.113619	0.0841827	1.34967	0.177123	0.555787
Ndufa10	2474.36	-0.0310372	0.0610371	-0.508497	0.611105	0.864627
Zc3h4	2516.85	-0.144145	0.107276	-1.34368	0.179051	0.55778
Rsrc2	2496.47	-0.014909	0.0744607	-0.200227	0.841303	0.953018
Gfm1	2487.68	0.0863676	0.0650241	1.32824	0.184099	0.56307
Tma7	2485.83	0.0302521	0.0783486	0.386122	0.699406	0.902402
Lag3	2539.27	0.0137773	0.111422	0.12365	0.901593	0.973947
Mia2	2458.38	-0.00187107	0.0732053	-0.0255593	0.979609	0.996208
Chd8	2459.74	-0.0853528	0.0804839	-1.0605	0.288919	0.665315
Usp5	2499.95	-0.0293504	0.0575003	-0.51044	0.609743	0.863859
Itsn2	2458.9	-0.00147197	0.0627507	-0.0234574	0.981285	0.996208
Ppip5k2	2400.94	-0.205054	0.103328	-1.9845	0.0472002	0.308173
Arfgef1	2437.06	0.164364	0.0791337	2.07704	0.0377982	0.276056
Asxl1	2492.24	0.0162837	0.115974	0.140408	0.888337	0.969795
Chchd3	2495.42	0.0292613	0.0674341	0.433924	0.664344	0.889139
Ubqln4	2464.86	-0.18777	0.0673114	-2.78957	0.00527781	0.102846
Rpl6l	2467.89	0.118131	0.0675235	1.74948	0.0802078	0.397249
Thoc2	2398.06	-0.0300117	0.0659532	-0.455045	0.649077	0.881825
Manf	2511.69	0.173224	0.0919683	1.88351	0.0596307	0.344466
Vdac3	2452.26	-0.0235857	0.0740299	-0.318597	0.750032	0.922903
Ssr2	2497.2	0.117871	0.0690317	1.70749	0.0877313	0.411804
Atp2a3	2471.94	-0.176964	0.0767886	-2.30456	0.0211912	0.209
Ube2l3	2442.4	-0.0276713	0.0498403	-0.555198	0.578759	0.850919
Safb2	2511.82	-0.150728	0.0816922	-1.84507	0.0650275	0.360678
Cic	2524.12	-0.182387	0.0799773	-2.28048	0.0225791	0.215478
Ddx54	2477.36	-0.221586	0.0635482	-3.4869	0.000488651	0.0261436
Rlim	2459.51	0.289111	0.062236	4.6454	3.39421e-06	0.00109865
Prdx2	2445.31	0.0377817	0.0606084	0.623374	0.533039	0.828613
Rbm5	2428.25	0.108613	0.0636798	1.70562	0.0880794	0.412291
Trim30a	2670.88	0.959121	0.279	3.43771	0.00058666	0.0300286
Csnk2b	2457.54	-0.0525877	0.0680003	-0.773344	0.439319	0.772166
Pdhb	2404.3	-0.0538118	0.06113	-0.880284	0.378705	0.734817
Rpl22l1	2571.12	-0.0810546	0.226713	-0.35752	0.720702	0.910618
Cops5	2452.49	0.0754253	0.0913972	0.825248	0.409231	0.755596
Rela	2466.92	-0.0806393	0.063596	-1.26799	0.204801	0.586367
Dhcr24	2463.41	-0.339679	0.0780566	-4.3517	1.35088e-05	0.00264316
Elob	2476.26	0.0145576	0.0730912	0.19917	0.84213	0.953018
Ubr2	2448	0.0579606	0.0820476	0.706427	0.479922	0.79513
Trmt1	2439.84	-0.158927	0.0724792	-2.19272	0.0283273	0.237648
Tox4	2463.97	0.0577096	0.0647953	0.890646	0.373119	0.730742
Zfp598	2469.36	-0.206345	0.0712499	-2.89607	0.00377866	0.0854639
Ccnl1	2418.73	0.108345	0.0893878	1.21208	0.225481	0.605773
Farsa	2485.84	0.071165	0.0580692	1.22552	0.220379	0.600317
Rap1gds1	2445.99	0.0322768	0.10839	0.297783	0.765869	0.9285
Sf3b6	2444.89	-0.0850307	0.136078	-0.624866	0.532059	0.828584
Atp8b2	2435.78	-0.115853	0.0658652	-1.75894	0.0785881	0.393332
Atp5j	2415.05	-0.2461	0.103838	-2.37004	0.0177862	0.189599
Efr3a	2393.83	0.0333348	0.0781422	0.426591	0.669677	0.890713
Virma	2422.04	0.00225292	0.0810514	0.0277962	0.977825	0.995839
Sec23b	2411.64	0.169578	0.068998	2.45772	0.0139823	0.174505
Minos1	2377.11	-0.0107679	0.112276	-0.0959057	0.923595	0.978295
Racgap1	2407.01	-0.135247	0.127135	-1.0638	0.28742	0.663326
Zfp445	2404.26	0.0780791	0.0480016	1.62659	0.103823	0.445203
Tmod3	2419.19	0.165842	0.0627974	2.64091	0.00826826	0.133204
Rexo2	2396.82	-0.0668599	0.0618764	-1.08054	0.279903	0.656998
Cers2	2439.84	0.0256508	0.0554317	0.462746	0.643547	0.879944
Icos	2382.81	-0.0479019	0.068492	-0.69938	0.484315	0.79935
Tcf20	2424.47	-0.216059	0.0850052	-2.54171	0.0110311	0.155784
Pafah1b2	2402.81	0.103388	0.0782572	1.32113	0.186458	0.566579
Zdhhc5	2427.06	-0.112966	0.0899555	-1.2558	0.20919	0.590148
Sart1	2461.33	-0.0727128	0.0647911	-1.12227	0.26175	0.641342
Insig1	2471.89	0.151616	0.0771534	1.96512	0.0494001	0.314182
Metap1	2357.1	0.0482083	0.0599098	0.804681	0.421004	0.763279
Vav1	2438.83	0.115889	0.0521891	2.22055	0.0263813	0.230662
Snrnp40	2442.88	-0.0683066	0.0537248	-1.27141	0.203581	0.584808
Akr1b3	2380.06	-0.0495697	0.111394	-0.444996	0.656323	0.885437
Nup214	2392.92	-0.148782	0.0940596	-1.58179	0.113698	0.46676
Dcaf1	2383.02	-0.0693238	0.0644242	-1.07605	0.281904	0.658789
Tmed7	2387.6	0.0111445	0.0711513	0.156631	0.875536	0.964269
Bub1b	2409.75	-0.0552317	0.122945	-0.449241	0.653258	0.884056
Amfr	2408.61	-0.0287917	0.0613618	-0.469212	0.638918	0.878647
Kdm5c	2412.8	0.0365786	0.0868194	0.421318	0.673523	0.891483
Ttc39b	2314.92	-0.0317535	0.084602	-0.375328	0.707417	0.905047
Rrs1	2405.16	-0.215642	0.0848837	-2.54044	0.0110713	0.155865
Psmb5	2429.17	0.0715682	0.0787841	0.908409	0.363662	0.723329
Acp1	2410.04	-0.00955957	0.0974754	-0.0980716	0.921875	0.977986
Med14	2303.77	-0.17699	0.0990873	-1.7862	0.0740665	0.381645
Stard4	2437.7	0.169467	0.0722475	2.34564	0.0189946	0.197612
Pi4ka	2381.48	-0.13459	0.0638243	-2.10876	0.034965	0.266768
Slc20a1	2367.92	-0.0948787	0.0856723	-1.10746	0.268095	0.647603
Tnpo2	2391.16	-0.0209077	0.0946438	-0.22091	0.825163	0.946845
Rilpl2	2388.37	-0.158465	0.123459	-1.28355	0.1993	0.579497
Ikbkap	2364.36	-0.0278413	0.08936	-0.311563	0.755373	0.924456
Trir	2416.67	0.0263536	0.0769726	0.342377	0.732067	0.915786
Gpbp1	2329.58	-0.0113604	0.0868081	-0.130868	0.89588	0.972437
Paxip1	2376.87	-0.143606	0.0605644	-2.37113	0.0177339	0.189599
Actr1a	2400.95	0.075379	0.0689351	1.09348	0.274184	0.654824
1110004F10Rik	2409.66	0.105995	0.0563061	1.88247	0.0597719	0.344985
Tnrc6a	2365.38	-0.0239165	0.0832907	-0.287145	0.774001	0.931656
2410002F23Rik	2390.6	0.0223028	0.0877326	0.254213	0.799331	0.93911
Ddx47	2385.73	0.179109	0.0707523	2.53149	0.0113577	0.157284
Ranbp3	2404.07	0.00197261	0.0625386	0.0315423	0.974837	0.994763
Mga	2350.25	0.15227	0.0743972	2.04672	0.0406854	0.284798
Tmem259	2435.96	-0.134396	0.079354	-1.69363	0.0903355	0.418107
Acap1	2379.26	-0.0694556	0.0596193	-1.16498	0.244025	0.625038
Adipor2	2401.09	-0.033248	0.0706155	-0.470831	0.637762	0.878647
Traf7	2391	0.030829	0.0576464	0.534795	0.592792	0.857714
Map3k7	2279.39	-0.225116	0.0946425	-2.3786	0.0173786	0.187867
Map4	2381.61	-0.013414	0.0733919	-0.182772	0.854977	0.957593
Usp14	2304.43	-0.0657964	0.0570698	-1.15291	0.248947	0.629411
Map4k4	2343.28	-0.0935263	0.0852155	-1.09753	0.272411	0.653217
Cdk2	2368.93	-0.0525898	0.0669801	-0.785155	0.432362	0.768159
Cinp	2372.99	0.0739578	0.0602658	1.22719	0.21975	0.599733
Nek7	2293.48	-0.105504	0.0890793	-1.18438	0.236262	0.618091
Thop1	2380.61	-0.0915333	0.0738304	-1.23978	0.215058	0.595631
Lap3	2350.93	0.0262077	0.0720555	0.363715	0.716071	0.908456
Rcl1	2358	-0.0137387	0.0672158	-0.204398	0.838043	0.951932
Rpf2	2314.14	-0.208612	0.0943552	-2.21092	0.0270415	0.232488
Ncapg	2308.43	0.021238	0.0702372	0.302375	0.762366	0.927682
Anxa6	2310.96	-0.00549349	0.0879159	-0.0624857	0.950176	0.987995
Blmh	2296.51	0.0187438	0.0663895	0.28233	0.77769	0.93269
Trpc4ap	2366.82	-0.0564905	0.0700288	-0.806676	0.419853	0.762603
Utp18	2324.89	-0.123677	0.0806405	-1.53369	0.125106	0.484649
Med12	2300.12	-0.257106	0.104247	-2.46633	0.0136507	0.172638
Fkbp3	2326.61	-0.122943	0.11232	-1.09458	0.273702	0.654113
Aurkb	2349.75	-0.114037	0.0972785	-1.17228	0.241087	0.622383
Sfi1	2329.89	-0.49169	0.234221	-2.09925	0.0357945	0.269704
Impdh2-ps	2356.25	-0.0963839	0.0671394	-1.43558	0.151122	0.525343
Ly9	2377.72	0.107059	0.0881307	1.21477	0.224453	0.604135
Tial1	2334.38	-0.0238792	0.056074	-0.425851	0.670216	0.890713
Gramd1a	2317.36	0.0183436	0.0817256	0.224453	0.822404	0.945864
Pole4	2330.98	-0.0638532	0.124686	-0.512111	0.608574	0.863262
Cdk17	2285.94	-0.145918	0.0756921	-1.92778	0.0538827	0.326956
Rps2-ps13	2311.02	0.0546379	0.0885186	0.617248	0.537071	0.829565
Zc3h14	2291.12	-0.017649	0.0562336	-0.313852	0.753634	0.924175
Zzz3	2270.12	-0.120789	0.0747798	-1.61527	0.106252	0.450919
Slc35e1	2315.13	-0.249152	0.0700456	-3.55701	0.000375106	0.0220894
Lta4h	2307.93	-0.139659	0.0637746	-2.18988	0.0285326	0.238383
AI662270	2339.19	0.167132	0.0801366	2.08558	0.0370163	0.274083
Rock1	2250.87	0.0264604	0.0534425	0.495119	0.620516	0.869827
Cdca4	2308.37	0.0208372	0.0713744	0.291942	0.770331	0.930446
Nmd3	2297.44	-0.118	0.102557	-1.15057	0.249909	0.630106
Orc3	2287.54	-0.0160558	0.0656108	-0.244712	0.806679	0.94126
Cops7a	2314.22	-0.103396	0.070222	-1.47241	0.14091	0.510813
Map2k2	2348.38	-0.159918	0.0670676	-2.38443	0.0171057	0.186441
Acot7	2307.2	0.051567	0.0710558	0.725725	0.468008	0.789965
Rnf20	2304.82	0.103616	0.060474	1.71339	0.08664	0.409599
Birc5	2275.84	-0.0196015	0.103882	-0.18869	0.850336	0.955309
Tle3	2329.13	-0.177161	0.0959626	-1.84614	0.0648714	0.360559
Rae1	2340.75	-0.11919	0.0598691	-1.99084	0.046498	0.305587
Srp9	2319.14	-0.128645	0.146197	-0.879943	0.37889	0.735058
Nktr	2279.07	-0.0323441	0.0712759	-0.453787	0.649982	0.882181
Nsd3	2338.9	0.185668	0.103801	1.7887	0.0736638	0.381465
Imp4	2310.99	0.0437803	0.0794884	0.550776	0.581787	0.85258
Piezo1	2287.39	-0.251547	0.0977412	-2.57361	0.0100645	0.147099
Senp6	2275.21	-0.0484548	0.0603551	-0.802829	0.422074	0.763492
Ostc	2307.49	0.0305553	0.0856167	0.356885	0.721178	0.910748
Rpa2	2326.48	0.0905208	0.0758369	1.19362	0.232625	0.613954
Idh3g	2270.95	-0.00341777	0.0505289	-0.0676399	0.946072	0.987073
Arglu1	2291.44	-0.108719	0.0722294	-1.50519	0.132275	0.494589
Phf5a	2276.97	0.0481349	0.0703764	0.683964	0.493998	0.806119
Usp10	2278.27	-0.133922	0.0624183	-2.14556	0.0319078	0.255663
Dnajb6	2317.13	-0.0880143	0.0729814	-1.20598	0.227824	0.608284
Naa40	2285.64	-0.0936851	0.0977892	-0.958031	0.338047	0.706097
Xcl1	2227.54	-0.59017	0.404891	-1.4576	0.14495	0.51652
Mier1	2250.81	-0.00185689	0.0699125	-0.0265602	0.978811	0.996137
Gm9800	2391.32	-0.197554	0.105402	-1.87428	0.0608914	0.348316
Sidt2	2274.08	-0.16593	0.0796238	-2.08393	0.0371667	0.274083
Aaas	2274.83	-0.165203	0.0822604	-2.00829	0.0446128	0.29866
Wac	2241.25	-0.0419536	0.0665192	-0.6307	0.528237	0.826304
Clk1	2270.57	-0.0459233	0.0833023	-0.551286	0.581438	0.85248
Wdr5	2284.33	-0.00606634	0.0724268	-0.0837582	0.933249	0.981601
Ppil1	2300.83	-0.0479982	0.0822937	-0.583254	0.559722	0.842639
Mettl16	2282.86	0.125327	0.0653822	1.91684	0.0552581	0.32989
Exosc8	2297.5	-0.0260831	0.0813671	-0.32056	0.748544	0.922785
Sart3	2299.28	-0.171744	0.0789829	-2.17445	0.0296715	0.244107
Evl	2303.49	-0.333318	0.0879411	-3.79024	0.0001505	0.0126785
Ddx56	2263.18	-0.103254	0.0608843	-1.69591	0.0899031	0.417061
Dnajc3	2259.29	-0.0164223	0.0619543	-0.265071	0.790955	0.937019
Ube2c	2213.3	-0.1842	0.225879	-0.81548	0.414798	0.758512
Rtel1	2270.24	-0.0326638	0.0696811	-0.468761	0.63924	0.878647
Cd2	2342.15	0.232367	0.129031	1.80087	0.0717241	0.377089
Rrn3	2225.9	-0.0906862	0.0703311	-1.28942	0.197253	0.578938
Agps	2237.25	-0.0283011	0.05244	-0.539685	0.589414	0.856332
Nop16	2267.57	0.0511608	0.0806604	0.634274	0.525902	0.824359
Ppp2r1b	2245.52	-0.0530303	0.0821054	-0.645881	0.518357	0.819094
Ndufs1	2263.47	0.0230087	0.0696259	0.330461	0.741052	0.91891
Imp3	2311.64	0.144131	0.0904741	1.59306	0.111146	0.461284
Dpp8	2221.37	-0.00288931	0.0775892	-0.0372386	0.970295	0.993807
Zdhhc18	2286.5	-0.0180552	0.0790087	-0.228522	0.81924	0.944625
Nsfl1c	2319.15	0.0143219	0.0984821	0.145426	0.884374	0.96835
Sf3a2	2305.45	-0.338836	0.07356	-4.60625	4.09995e-06	0.0011441
Nudcd2	2244.39	-0.0889697	0.101667	-0.875106	0.381516	0.736817
Slk	2247.56	0.053033	0.0677394	0.782898	0.433687	0.76855
Capns1	2271.77	0.0935495	0.0641712	1.45781	0.144892	0.51652
Ppp1r16b	2267.7	0.107029	0.0631553	1.6947	0.0901322	0.417492
Sumo3	2266.04	-0.185327	0.0852252	-2.17455	0.0296637	0.244107
Nf2	2278.64	-0.115102	0.0895179	-1.2858	0.198514	0.578938
Pwp2	2244.16	-0.0847715	0.0913385	-0.928102	0.353355	0.714964
Gm13835	2242	-0.0824803	0.140711	-0.586169	0.557762	0.84141
Eif1ad	2261.98	0.0604074	0.0808741	0.746932	0.455105	0.781773
Dnajc11	2260.95	-0.00478983	0.0587518	-0.0815265	0.935023	0.982483
Ncapd3	2223.39	0.00585675	0.102201	0.0573062	0.954301	0.989588
Fam162a	2308.35	0.0846109	0.0982221	0.861424	0.389004	0.742217
Hnrnph2	2284.23	0.210567	0.0918635	2.29218	0.0218954	0.212367
Gpat4	2230.57	0.0184623	0.0663202	0.278381	0.78072	0.93354
Nptn	2239.16	0.118409	0.111159	1.06523	0.286773	0.66289
Cpsf3	2231.86	-0.0182384	0.0771446	-0.236418	0.813108	0.942476
Rnf145	2251.16	-0.0890608	0.0567257	-1.57003	0.116409	0.472169
Wdr33	2260.33	-0.127335	0.0572149	-2.22555	0.0260442	0.229618
Dhfr	2252.21	-0.10341	0.106283	-0.972969	0.330569	0.700627
Taldo1	2281.4	0.137961	0.078791	1.75098	0.0799493	0.39701
Ppp4r2	2227.02	-0.143096	0.0710174	-2.01494	0.0439109	0.297093
Bcl11b	2222.83	-0.386527	0.109424	-3.53239	0.000411817	0.023236
Abcb1b	2148.03	-0.4161	0.126309	-3.2943	0.000986667	0.0418505
Srp68	2258.43	0.139735	0.0814172	1.71628	0.08611	0.408845
Gtpbp1	2262.26	0.00343541	0.0632689	0.0542985	0.956697	0.990299
Arf4	2279.82	0.232498	0.0650812	3.57242	0.000353694	0.0212409
Fabp5	2277.97	0.0828781	0.0721355	1.14892	0.250588	0.630813
Ier2	2213.61	-0.114406	0.102085	-1.12069	0.262422	0.641563
Smarcc2	2233.76	-0.132935	0.0690853	-1.92421	0.0543283	0.328292
H2afx	2256.15	-0.203898	0.0891817	-2.28632	0.0222354	0.214582
Dnm2	2260.73	-0.137792	0.0598483	-2.30236	0.021315	0.209361
Stk26	2161.36	-0.100962	0.102406	-0.985904	0.32418	0.694914
Med1	2235.88	-0.0584248	0.0769256	-0.759498	0.447555	0.777337
Flii	2214.16	-0.0301503	0.0599407	-0.503002	0.614963	0.865976
Prkcq	2223.72	-0.267176	0.11229	-2.37934	0.0173439	0.187867
Clptm1	2232.62	-0.0974989	0.0562815	-1.73234	0.0832122	0.403295
Cops6	2269.67	0.0108627	0.072613	0.149598	0.881082	0.967189
Csnk1g2	2267.17	-0.289411	0.0808938	-3.57766	0.00034668	0.0210279
Sugt1	2240.97	0.0188373	0.0852067	0.221078	0.825032	0.946845
Ccl4	2127.86	-0.172681	0.326703	-0.528555	0.597114	0.859075
Dnajb11	2256.24	0.0783643	0.0810292	0.967112	0.333488	0.702969
Zdhhc3	2219.33	-0.076055	0.0673805	-1.12874	0.259007	0.638801
Tab2	2205.48	0.205245	0.0900479	2.27929	0.0226501	0.215495
Senp2	2182.61	-0.116666	0.0737086	-1.5828	0.113467	0.466722
Rabl6	2225.46	-0.288722	0.0610874	-4.72638	2.28559e-06	0.000840198
Tet3	2228.2	-0.15723	0.0986902	-1.59317	0.111122	0.461284
Swi5	2248.35	-0.023484	0.0906775	-0.258984	0.795648	0.938118
Nans	2246.93	0.0280873	0.0528291	0.531664	0.594958	0.858117
Mrpl12	2262.72	-0.114972	0.10432	-1.10211	0.270413	0.650739
Copz1	2244.52	0.16344	0.0721947	2.26387	0.023582	0.220226
Mtap	2164.77	-0.0332978	0.0696492	-0.478078	0.632595	0.876528
Ppp3cb	2163.34	-0.00524197	0.0577943	-0.0907004	0.927731	0.97906
Gm6863	2263.84	0.0766659	0.0935712	0.819331	0.412597	0.758274
Rassf5	2191.49	-0.103721	0.0788463	-1.31548	0.188347	0.568726
Ccdc47	2205.74	0.0436129	0.0902999	0.482979	0.629111	0.873897
Tsr1	2200.38	-0.0423638	0.0810371	-0.52277	0.601134	0.859884
Gak	2211.93	0.0101425	0.0647936	0.156535	0.875611	0.964269
Hnrnpa3	2184.55	0.0178063	0.0663552	0.268349	0.788431	0.936233
Orc2	2163.5	-0.120348	0.0644501	-1.8673	0.0618596	0.351814
Zmynd19	2220.28	-0.0905256	0.0731239	-1.23798	0.215725	0.596111
Tbx21	2246.07	-0.0714809	0.0800998	-0.892398	0.37218	0.729978
Etv6	2218.34	0.127768	0.0944035	1.35343	0.175918	0.554416
Tmed9	2232.46	0.0479326	0.0830669	0.577036	0.563915	0.844118
Suclg1	2206.52	-0.0147857	0.0824511	-0.179327	0.857681	0.957893
Snhg6	2133.85	-0.371872	0.15184	-2.44911	0.0143209	0.175192
Rnf126	2242.1	-0.185425	0.0573957	-3.23065	0.00123509	0.0461012
Zmpste24	2150.63	0.0895175	0.0872803	1.02563	0.305065	0.678788
Tmem131	2177.74	-0.20967	0.0900335	-2.3288	0.0198695	0.201494
Prmt7	2177.53	-0.110337	0.0712792	-1.54796	0.121632	0.480409
Rab1a	2177.2	0.0617562	0.0527761	1.17015	0.241939	0.622738
Dock11	2129.58	-0.0114	0.116575	-0.097791	0.922098	0.978009
Ltv1	2167.09	0.0453733	0.0715764	0.633915	0.526137	0.824537
Fam136a	2192.82	-0.0723982	0.0887952	-0.815339	0.414878	0.758512
Glipr2	2205.57	0.167778	0.157664	1.06415	0.287261	0.663132
Arf5	2219.62	-0.113225	0.0906818	-1.2486	0.211812	0.592869
Nudt5	2168.87	0.000309577	0.0614518	0.00503772	0.99598	0.999212
Dr1	2141.68	-0.114124	0.0877243	-1.30094	0.193281	0.573936
Afg3l2	2195.09	-0.00480441	0.0723292	-0.0664242	0.94704	0.987073
Ogfr	2238.56	0.188276	0.0812833	2.31629	0.0205424	0.205103
Phf10	2183.35	0.0654441	0.0898396	0.728454	0.466335	0.789116
Slc38a10	2167.33	-0.201199	0.0661858	-3.03992	0.00236642	0.0650952
Tm9sf2	2161.06	0.0163917	0.0542239	0.302296	0.762426	0.927682
Gm11808	2264.52	-0.140995	0.0944022	-1.49356	0.135292	0.499611
Phrf1	2178.53	-0.124472	0.0792821	-1.56999	0.116417	0.472169
Msl2	2125.26	-0.101035	0.064573	-1.56466	0.117662	0.474678
Cd3g	2160.11	-0.329265	0.130423	-2.5246	0.0115831	0.159277
Tacc3	2166.89	0.022165	0.083272	0.266176	0.790104	0.936677
Rmnd5a	2148.93	-0.0595493	0.0727538	-0.818503	0.41307	0.75843
Bax	2160.88	-0.230372	0.0985124	-2.3385	0.0193611	0.199042
Snhg5	2139.19	0.0776291	0.114197	0.679783	0.496642	0.807743
Trmt6	2143.29	-0.0623499	0.0709319	-0.879011	0.379395	0.73545
Snrpb2	2166.86	-0.0583891	0.12023	-0.485646	0.627218	0.873733
Msi2	2156.23	-0.158589	0.0749708	-2.11535	0.0344005	0.265187
Phip	2184.51	0.4002	0.138438	2.89082	0.00384241	0.0861594
Ppif	2147.22	-0.207954	0.0816999	-2.54534	0.0109171	0.154895
Trpm7	2092.74	-0.252546	0.0922806	-2.73672	0.00620547	0.113031
Cdkn2aipnl	2130.64	-0.162184	0.07978	-2.03289	0.0420636	0.289763
Gm2000	2234.56	0.0956722	0.171902	0.556551	0.577835	0.850571
Eloc	2175.43	0.0628065	0.10825	0.580199	0.561781	0.843174
Rps6ka1	2128.52	-0.168151	0.0665566	-2.52644	0.0115226	0.158842
Sh3glb1	2155.93	0.132397	0.0637672	2.07626	0.0378702	0.276352
Traf6	2127.02	0.190629	0.0926126	2.05835	0.039557	0.281329
Herc1	2133.08	0.172666	0.0687456	2.51166	0.0120164	0.161968
Hsd17b12	2152.44	-0.0678509	0.0886819	-0.765104	0.44421	0.775019
Nemf	2154.41	-0.00363451	0.0692871	-0.0524558	0.958166	0.990299
Snrpa1	2168	0.0167935	0.0793024	0.211766	0.83229	0.949412
Parp14	2235.97	0.607049	0.147281	4.12171	3.76063e-05	0.00518411
Cnot10	2140.16	0.0231551	0.0769389	0.300955	0.763449	0.928182
Cdc25a	2144.74	-0.111445	0.0713954	-1.56096	0.118533	0.47519
Cox7a2l	2151.82	0.0971188	0.0646636	1.50191	0.133121	0.496429
Ndufv1	2177.98	0.0920104	0.0646999	1.42211	0.154995	0.529691
Ppp3r1	2124.37	-0.0697286	0.0660988	-1.05492	0.291464	0.667501
Park7	2187.48	0.0410548	0.0795899	0.515829	0.605974	0.86179
Dcp2	2130.49	0.0214871	0.0672261	0.319625	0.749253	0.922903
Derl1	2203.6	0.313319	0.0592694	5.28636	1.24774e-07	0.000108116
Adipor1	2147.13	0.0163619	0.0580271	0.281971	0.777966	0.932744
Ltn1	2114.52	0.068278	0.0822279	0.830351	0.406341	0.753869
Iws1	2121.05	-0.0170139	0.0546026	-0.311596	0.755348	0.924456
Akap13	2123.01	-0.104168	0.0896323	-1.16217	0.245168	0.625783
Mrpl30	2157.3	-0.112715	0.110039	-1.02431	0.305687	0.679547
Tmem30a	2084.43	0.0145523	0.068302	0.213059	0.831281	0.949233
Dnajc13	2099.42	0.00700023	0.0747075	0.0937018	0.925346	0.978405
Fmr1	2112.22	-0.100122	0.0807432	-1.24	0.214975	0.595631
Rab8a	2176.89	0.12277	0.0693623	1.76999	0.0767293	0.388158
Ppp1r12a	2122.61	-0.0434814	0.0682976	-0.636647	0.524355	0.823196
Fxr1	2149.44	0.135205	0.0661666	2.0434	0.0410128	0.285605
Napa	2143.48	0.0423115	0.0608092	0.695808	0.486549	0.800808
Igf2r	2070.5	-0.303918	0.124405	-2.44297	0.0145671	0.17531
Stag1	2080.57	-0.0362251	0.057786	-0.626883	0.530736	0.828191
Ssr4	2156.76	-0.0865799	0.112662	-0.768494	0.442194	0.774398
Rock2	2101.18	0.0631165	0.0658833	0.958005	0.33806	0.706097
Tapbpl	2159.97	0.0713222	0.0852365	0.836757	0.402729	0.752223
Mllt3	2124.26	-0.0740506	0.137006	-0.540493	0.588857	0.85591
Sdcbp	2137.87	0.00788335	0.102971	0.0765586	0.938975	0.983798
Gnl3l	2106.28	-0.193128	0.0777245	-2.48478	0.0129631	0.169022
Cndp2	2149.03	-0.00735106	0.064255	-0.114404	0.908917	0.976407
4932438A13Rik	2089.85	0.187042	0.111521	1.6772	0.0935042	0.42372
Carmil2	2155.85	-0.244942	0.0792739	-3.08982	0.00200275	0.0596421
Arhgef3	2075.15	-0.338932	0.164286	-2.06305	0.0391075	0.280552
Smpd4	2109.46	0.0137636	0.0773995	0.177826	0.85886	0.958145
Stk24	2122.19	-0.131595	0.0650409	-2.02327	0.0430458	0.294357
Ikbkb	2118.21	0.0832932	0.0666706	1.24932	0.211547	0.592844
Fbxw11	2111.38	-0.0462872	0.0699871	-0.661367	0.508377	0.813494
Nipbl	2075.52	0.01475	0.066442	0.221998	0.824315	0.94641
Abca2	2122.02	-0.374152	0.104068	-3.59528	0.000324043	0.0204738
Zfp62	2071.53	-0.145537	0.0805799	-1.80612	0.0708992	0.375973
Mtf2	2084.89	-0.0422537	0.0705692	-0.598755	0.549336	0.83744
Cdc6	2137.78	0.119545	0.0761207	1.57047	0.116307	0.472036
Ints3	2116.16	-0.147602	0.0991193	-1.48913	0.136453	0.501609
Elf1	2111.19	0.0332478	0.0916053	0.362946	0.716645	0.908614
Nup133	2109.66	-0.113862	0.0643939	-1.76821	0.0770255	0.38917
Cnot2	2117.58	0.104353	0.069866	1.49361	0.135278	0.499611
Bap1	2126.09	-0.130976	0.0660321	-1.98352	0.047309	0.308552
Wsb1	2091.26	0.185209	0.0686944	2.69613	0.00701494	0.12141
Heg1	2102.08	-0.0570126	0.114431	-0.498229	0.618323	0.868157
Eif4e2	2132.44	-0.0542275	0.0563307	-0.962664	0.335716	0.70439
Prps2	2103.38	0.0343102	0.0664507	0.516325	0.605627	0.861591
Mpp6	2101.24	-0.10969	0.0558258	-1.96486	0.0494299	0.314182
Ankfy1	2101.95	0.125795	0.0712821	1.76475	0.0776057	0.391548
Gtf3c1	2079.32	-0.270145	0.0863586	-3.12818	0.0017589	0.0564248
Cyld	2106.56	0.210071	0.073425	2.86103	0.00422273	0.0906654
Pmpca	2089.55	-0.0990239	0.0539875	-1.8342	0.0666245	0.364387
Ube2z	2143.09	-0.0139753	0.061901	-0.225769	0.821381	0.94561
Cops4	2102.15	0.0902444	0.0572888	1.57525	0.115198	0.470798
Rad50	2095.85	0.00563433	0.0755816	0.0745463	0.940576	0.984565
Tecr	2159.29	0.110111	0.0599756	1.83593	0.0663684	0.363976
Aimp1	2111.11	0.0352264	0.0648269	0.543392	0.58686	0.8556
Adk	2093.47	-0.154059	0.119734	-1.28668	0.198206	0.578938
Irak1	2096.48	-0.244759	0.0730348	-3.35126	0.000804445	0.0373897
Ggnbp2	2103.03	0.0817034	0.0616752	1.32474	0.185259	0.56495
Dhx16	2117.17	-0.211732	0.0658586	-3.21494	0.00130471	0.0466884
Arl8b	2071.12	0.02836	0.0617874	0.458994	0.646238	0.88103
Orc6	2099.29	0.0338461	0.101689	0.332841	0.739254	0.918654
Selenoh	2142.05	-0.0454577	0.0846904	-0.536751	0.59144	0.857397
1700020I14Rik	2113.8	0.127796	0.0622699	2.05229	0.0401415	0.283279
Ythdf1	2117.87	0.00297641	0.0565351	0.052647	0.958013	0.990299
Nob1	2134.9	0.0804888	0.0603586	1.33351	0.182364	0.561249
Gm7964	2061.08	-0.0185148	0.0823533	-0.224822	0.822118	0.945864
Zfp638	2061.94	-0.120146	0.114254	-1.05157	0.292998	0.668651
Phf20l1	2042.21	-0.0944007	0.0822923	-1.14714	0.251324	0.631397
Golph3	2067.08	0.0816177	0.0671454	1.21554	0.224162	0.603753
Cbx1	2118.28	-0.0568177	0.0637267	-0.891583	0.372616	0.730307
Klf6	2068.9	0.408375	0.170254	2.39862	0.0164568	0.182151
Tor1aip2	2106.03	0.230437	0.0692349	3.32834	0.000873648	0.0391078
Cdc45	2102.84	0.0701856	0.0545841	1.28582	0.198504	0.578938
Atp5l	2103.82	-0.254464	0.142594	-1.78454	0.0743363	0.381645
Dcaf8	2110.48	-0.0111522	0.0584682	-0.190741	0.848729	0.955027
Ctsz	2183.4	0.600886	0.28943	2.0761	0.0378847	0.276352
Stk11	2139.27	-0.0634078	0.0740039	-0.856817	0.391546	0.74341
Ube3a	2027.53	-0.144016	0.0831007	-1.73303	0.083091	0.403295
Vim	2013.58	0.530719	0.353626	1.50079	0.133409	0.497046
Ndc1	2036.57	0.00827036	0.0859533	0.0962192	0.923347	0.978295
Bub1	2053.74	0.0770744	0.0778756	0.989712	0.322315	0.694001
Bcas2	2073.51	-0.110383	0.070544	-1.56474	0.117644	0.474678
Ibtk	2075.51	0.184634	0.0629884	2.93125	0.00337604	0.0806196
Setdb1	2069.7	-0.0587782	0.0652768	-0.900444	0.367884	0.726979
Tmx1	2053.46	0.0338313	0.062425	0.541951	0.587852	0.8556
Pds5b	2048.47	-0.0544509	0.0794928	-0.684979	0.493357	0.805399
Tsnax	2081	0.0129083	0.0673736	0.191593	0.848061	0.954902
Carm1	2062.08	-0.287307	0.0813314	-3.53255	0.000411573	0.023236
Gtf2f1	2110.78	-0.0113906	0.0684398	-0.166432	0.867817	0.960577
9530068E07Rik	2065.12	0.0250633	0.0732906	0.341971	0.732373	0.915919
Psph	2121.53	0.385566	0.0936426	4.11742	3.83138e-05	0.0052223
Gfpt1	1996.35	0.0283237	0.0875459	0.32353	0.746294	0.921456
Rbx1	2050.42	0.135187	0.0846901	1.59626	0.110431	0.460635
Pde7a	1994.53	-0.0812853	0.0938629	-0.865999	0.386491	0.74039
Marcksl1	2097.85	0.0416777	0.162555	0.256391	0.797649	0.938898
Aff3	2066.75	-0.0870163	0.112387	-0.774252	0.438782	0.771897
Gimap1	2069.4	0.00209751	0.0766848	0.0273523	0.978179	0.995839
Clspn	2062.51	-0.192863	0.0768913	-2.50826	0.0121328	0.162274
Itm2a	2030.33	-0.896393	0.346904	-2.58398	0.0097668	0.144561
Mbd2	2049.08	-0.0672438	0.072772	-0.924034	0.355469	0.716668
Mybl2	2111.2	0.0816185	0.0905951	0.900915	0.367634	0.72682
Sumo2	1992.52	-1.1284	0.583627	-1.93343	0.0531828	0.325018
Msh2	2067.29	-0.15349	0.080276	-1.91203	0.0558729	0.332637
Pck2	2131.98	0.41179	0.133271	3.08988	0.00200239	0.0596421
Gar1	2110.06	-0.133548	0.119105	-1.12126	0.262177	0.641521
Scaf1	2061.24	-0.380623	0.0822122	-4.62976	3.66097e-06	0.00111891
Rbm33	2051.82	-0.1102	0.0632296	-1.74285	0.0813604	0.39975
Letm1	2065.98	-0.176416	0.0677764	-2.60291	0.0092435	0.141037
Rpl31-ps8	2138.54	-0.166517	0.169638	-0.981605	0.326295	0.696512
Thoc1	2010.4	-0.114713	0.102322	-1.1211	0.262246	0.641521
Tmem167	2043.4	-0.0578242	0.0901064	-0.641732	0.521047	0.820353
Casp8ap2	2023.91	-0.0520735	0.0930912	-0.559381	0.575902	0.85047
Trim44	2062.16	-0.026311	0.0706247	-0.372547	0.709486	0.906215
Emc10	2078.3	-0.168864	0.0807328	-2.09165	0.0364702	0.271924
Pelp1	2080.92	-0.303725	0.0641442	-4.73503	2.19027e-06	0.000840198
Tk1	2084.08	-0.0695593	0.0591337	-1.17631	0.239473	0.621267
Cdk9	2067.32	-0.0422025	0.0632274	-0.667471	0.504471	0.81131
Mrpl3	2024.69	-0.12005	0.0643858	-1.86454	0.0622454	0.352408
Atf1	2029.5	-0.0521839	0.0592634	-0.880542	0.378566	0.734785
Hax1	2098.88	0.370098	0.0959423	3.85751	0.000114549	0.0101702
Nutf2	2047.26	0.0249408	0.0563519	0.442591	0.658062	0.886143
Ipo11	2015.43	0.0639911	0.0709797	0.901541	0.367301	0.726398
Xrcc6	2068.99	-0.0856876	0.0698061	-1.22751	0.219631	0.599733
Ube2q1	2046.02	-0.0436483	0.052733	-0.827722	0.407828	0.7547
D16Ertd472e	2018.95	0.0542808	0.0604041	0.898627	0.368851	0.727608
Bst2	2134.78	0.541429	0.124524	4.34799	1.37389e-05	0.00264549
Pdpk1	2018.38	0.0032243	0.0685619	0.0470276	0.962491	0.991201
Xrcc5	1997.7	-0.233117	0.100964	-2.3089	0.0209489	0.207963
Rab14	2026.47	0.0714059	0.0832025	0.858218	0.390772	0.743367
Smarce1	2059.05	-0.000976033	0.0663336	-0.014714	0.98826	0.997791
Rrp7a	2054.93	-0.255842	0.0526303	-4.86112	1.16724e-06	0.000589991
Rpl23a-ps3	2066.48	-0.0838909	0.095527	-0.87819	0.37984	0.735928
Bdp1	1981.32	0.140467	0.0772204	1.81904	0.0689054	0.371177
Ppp2r2a	2002.82	-0.0819188	0.0553412	-1.48025	0.138807	0.506121
Cdc5l	2018.83	0.0852988	0.064139	1.32991	0.183549	0.562677
Ddx52	1995.12	-0.0308485	0.0927502	-0.332598	0.739438	0.918733
Rps6ka3	1994.22	0.0942361	0.0808188	1.16602	0.243608	0.624885
Sp110	2074.95	0.200632	0.0822852	2.43825	0.0147585	0.176538
Cabin1	2020.67	-0.208215	0.095592	-2.17816	0.0293939	0.2429
Ap1g1	1999.45	-0.0406201	0.0707373	-0.574239	0.565806	0.844567
Mllt1	2026.92	-0.226765	0.0581877	-3.89713	9.73402e-05	0.00944667
Nop9	2036.9	-0.0332086	0.084264	-0.394102	0.693506	0.899695
Ap1m1	2008.08	-0.100333	0.0700145	-1.43303	0.15185	0.52541
Ubxn1	2055.17	0.0326648	0.0895048	0.364951	0.715148	0.908375
[truncated: 12,722 more rows]

## Sheet: TCox10_vs_WT
gene_name	baseMean	log2FoldChange	lfcSE	stat	pvalue	padj
Eef1a1	188758	0.122959	0.0714854	1.72006	0.0854209	0.279259
mt-Co1	168916	0.0964752	0.103256	0.93433	0.350134	0.621684
Eef2	98404.4	0.174057	0.0474079	3.67148	0.000241154	0.00622939
Hsp90ab1	89481	-0.0278688	0.0540648	-0.515471	0.606224	0.812092
mt-Nd1	84079.1	0.0732254	0.108737	0.673417	0.500682	0.745617
Hspa8	79017.4	-0.0648427	0.0492887	-1.31557	0.188319	0.442882
Rpsa	79140.5	-0.0971504	0.0710304	-1.36773	0.171397	0.418873
Actb	78913.6	0.0942233	0.0674916	1.39607	0.162692	0.406575
Rplp0	73058.2	-0.0588442	0.0461949	-1.27383	0.202725	0.462424
Npm1	67982.1	-0.279012	0.101062	-2.76081	0.00576586	0.0504916
Ncl	66936.3	-0.0342277	0.0784664	-0.436209	0.662685	0.844035
Rpl4	65372.4	-0.0435741	0.0607562	-0.717196	0.473253	0.724682
Ldha	53079.3	-0.184628	0.0772389	-2.39034	0.0168326	0.103201
mt-Cytb	51165.3	-0.552945	0.103223	-5.35683	8.46966e-08	2.90671e-05
Tubb5	49968.7	-0.0363091	0.0654584	-0.55469	0.579107	0.79546
Pkm	47467.9	-0.292441	0.0875641	-3.33973	0.000838589	0.0143386
Rpl7	45849.7	-0.23047	0.107778	-2.13838	0.0324859	0.156466
Rps2	45979	-0.0455171	0.0544267	-0.836301	0.402986	0.667736
Hsp90aa1	44961.6	-0.13386	0.0730187	-1.83323	0.0667688	0.241689
Rps4x	44549.3	-0.16831	0.0872531	-1.92898	0.053733	0.213114
Rplp1	45417.8	-0.0384456	0.113765	-0.337939	0.735409	0.883791
Ptma	43945.1	-0.115313	0.0719833	-1.60194	0.109169	0.323511
Rack1	43129.9	0.0681964	0.071799	0.949824	0.342202	0.614755
Rpl3	42934.2	-0.0912338	0.0434916	-2.09774	0.0359285	0.166198
Pabpc1	41421.3	0.0829182	0.037087	2.23577	0.0253666	0.13542
Rps3a1	41836.3	-0.195503	0.10356	-1.88782	0.0590497	0.225051
Ppia	40770.1	-0.089426	0.105243	-0.849708	0.395488	0.661164
Tpt1	39946.6	0.0243307	0.100238	0.242729	0.808216	0.919683
Rpl5	40035.2	-0.120333	0.105134	-1.14457	0.252387	0.518369
Eno1	40537.6	-0.479639	0.144803	-3.31235	0.000925148	0.0152401
Rpl13	40082	0.0189876	0.0785828	0.241625	0.809071	0.920046
Rpl41	39420.2	-0.153871	0.117343	-1.31129	0.189761	0.444832
Rps3	37887.8	0.0499853	0.116672	0.428426	0.668341	0.847122
Eif5a	36665.4	0.0903274	0.0524145	1.72333	0.084829	0.278208
Rpl6	36836.3	-0.0438775	0.0519762	-0.844184	0.398566	0.663924
mt-Nd2	34199.8	-0.32284	0.0856395	-3.76976	0.000163407	0.00485638
Tmsb4x	34409	-0.113687	0.124368	-0.914115	0.360656	0.631422
mt-Nd5	32615.5	-0.442629	0.0900258	-4.91669	8.80187e-07	0.000138534
Actg1	32672.6	0.0299587	0.0870861	0.344012	0.730837	0.881161
Hspd1	32845.5	0.0139418	0.0737179	0.189124	0.849996	0.941098
Rpl8	33420.2	0.000491871	0.0566896	0.00867657	0.993077	0.997256
Rpl12	32800	-0.0359532	0.115592	-0.311035	0.755774	0.892928
Rps18	32829.1	0.0697154	0.129945	0.536499	0.591614	0.803407
Rps26	31321.2	-0.283146	0.110995	-2.55097	0.0107423	0.0771113
Rpl10	31587.6	-0.157295	0.0651005	-2.41619	0.0156839	0.0985044
Rps6	31095.1	-0.0514295	0.0660461	-0.77869	0.436162	0.694602
Rps24	31414	-0.188794	0.110309	-1.7115	0.0869885	0.281896
Rps5	30374.3	0.0119264	0.0957997	0.124494	0.900925	0.962277
Eif4g2	29376.7	-0.0329638	0.0532583	-0.618941	0.535955	0.768513
Eif4a1	29865.6	-0.119022	0.0644303	-1.8473	0.0647039	0.236929
Rps8	29162.3	0.0881363	0.0625391	1.4093	0.158746	0.4008
Atp5b	28847.9	0.0118268	0.0392911	0.301005	0.763411	0.897025
Serbp1	29118.8	-0.112429	0.0634401	-1.77222	0.0763588	0.260567
Tuba1b	28933.3	-0.109078	0.0434079	-2.51286	0.0119756	0.0829088
Rps14	29132.3	-0.070078	0.148616	-0.471538	0.637257	0.830531
Hnrnpu	28548.3	0.0660441	0.0525125	1.25768	0.208507	0.469266
Eef1g	28564.6	0.0656902	0.0456902	1.43773	0.15051	0.391034
Rpl18a	28313.5	-0.118877	0.116416	-1.02113	0.307191	0.5794
Hnrnpa2b1	27868.2	-0.0959422	0.0618355	-1.55157	0.120765	0.34312
Hnrnpa1	27971.5	-0.268128	0.0901452	-2.9744	0.00293562	0.0326652
Ybx1	27283.4	0.112183	0.0510116	2.19917	0.0278661	0.143042
Rpl10a	27135.4	-0.0628234	0.0761488	-0.825008	0.409367	0.672895
Cfl1	25539.2	-0.102001	0.061837	-1.64951	0.0990432	0.303747
Aldoa	25933.6	-0.312965	0.103519	-3.02326	0.00250064	0.029352
Rpl27a	25383.3	-0.0831654	0.0796877	-1.04364	0.296652	0.56808
Gzmb	24249.9	0.212224	0.363116	0.584453	0.558916	0.782519
B2m	24508.3	0.0566091	0.0872418	0.648876	0.516418	0.755701
Rps9	24800	-0.042432	0.0576783	-0.735667	0.461933	0.714564
Ptprc	23204.2	-0.120737	0.0968266	-1.24694	0.212419	0.473013
Set	23772.8	-0.142335	0.0566808	-2.51117	0.0120333	0.0832161
Pgk1	24089.7	-0.401944	0.112761	-3.56457	0.000364452	0.00819536
Rps25	23555	-0.15102	0.129618	-1.16512	0.243972	0.509064
Rpl18	23590.4	0.0799375	0.0739906	1.08037	0.279976	0.548657
Rps20	23523.6	-0.192603	0.0780722	-2.46698	0.0136258	0.0903416
mt-Rnr2	22314.5	-0.0827854	0.135684	-0.610134	0.541773	0.772554
Rps7	23001.5	-0.0765569	0.190347	-0.402197	0.687539	0.859961
Rpl14	22845.2	0.0746392	0.0588889	1.26746	0.204992	0.465712
Lcp1	22306.1	0.0729068	0.0548177	1.32999	0.183523	0.436649
Rpl32	22800.9	-0.00811346	0.0729727	-0.111185	0.91147	0.966936
mt-Nd4	22104.4	-0.504947	0.101562	-4.97181	6.63292e-07	0.000122573
Cnbp	21986.1	-0.110003	0.0797743	-1.37893	0.167915	0.414297
Tfrc	21832.3	-0.185602	0.106937	-1.73562	0.0826314	0.273867
Ran	22240.4	0.0970903	0.0595085	1.63154	0.102777	0.310865
Atp5a1	21704.2	0.0642889	0.0461251	1.3938	0.163379	0.407571
Ddx5	21266.1	0.0931402	0.0504954	1.84453	0.0651065	0.237887
Rpl26	20888.4	-0.136145	0.134696	-1.01075	0.312134	0.583558
Rps16	21071.8	-0.0473761	0.0840489	-0.563673	0.572977	0.791089
Rps23	20658.2	-0.0359979	0.093408	-0.385384	0.699953	0.865573
Pfn1	20610.7	0.105004	0.0492543	2.13187	0.0330172	0.158086
Kpnb1	19441	0.0095813	0.066202	0.144728	0.884926	0.955726
Slc25a5	19519.2	0.0161567	0.0592517	0.272678	0.785101	0.907488
Rpl19	19701.2	-0.148152	0.070866	-2.0906	0.0365642	0.167423
Rps27a	19181.7	0.121185	0.359683	0.336922	0.736176	0.883939
Rps12	18800.8	0.0567535	0.110819	0.512131	0.60856	0.813482
Top2a	18949.5	-0.201684	0.0920336	-2.19142	0.0284217	0.144709
Rpl34	19645.6	-0.0910643	0.162719	-0.559641	0.575724	0.792824
Eef1b2	19304.1	-0.0148649	0.0658081	-0.225883	0.821293	0.927193
Rpl11	19497.1	-0.0114075	0.114768	-0.0993959	0.920824	0.970727
Eif4g1	18686.2	0.226561	0.0704728	3.21488	0.00130501	0.0191929
Irf4	18349.8	0.0839894	0.10382	0.80899	0.418521	0.680646
Hnrnpab	18585.8	0.172167	0.0770281	2.23512	0.0254098	0.13555
Mybbp1a	18003.7	0.332497	0.0622316	5.34289	9.14749e-08	2.93004e-05
Hspa9	18001.5	-0.0213991	0.0620909	-0.344642	0.730363	0.881032
Mif	18478.4	-0.120766	0.0555506	-2.17399	0.0297059	0.148718
Nap1l1	17665.3	-0.0756918	0.0529871	-1.4285	0.153149	0.393984
Rpl15	18140.8	-0.0591997	0.101104	-0.585536	0.558188	0.782166
Rps15	18376.8	0.040031	0.0791278	0.505903	0.612924	0.816129
Odc1	17226.2	0.273224	0.0632263	4.32137	1.5506e-05	0.00110645
Rpl9	17803.7	0.0374939	0.0715641	0.523921	0.600333	0.808484
Rps17	17832.3	-0.120685	0.117548	-1.02669	0.304569	0.576728
Tpi1	18181.5	-0.412713	0.126563	-3.26094	0.00111043	0.017192
Pcna	17459.2	-0.000493229	0.0981276	-0.0050264	0.99599	0.9979
Hspa5	17282.8	-0.12776	0.0565743	-2.25826	0.0239292	0.130452
Rpl31	17459.9	-0.145843	0.145889	-0.999679	0.317466	0.589837
Hnrnpk	17139.3	-0.0588731	0.0598528	-0.983632	0.325297	0.597912
Rps15a	17210.8	-0.163977	0.124224	-1.32001	0.186833	0.441405
Rps19	17204.8	-0.0223282	0.0843873	-0.264593	0.791323	0.910597
Scd2	16981.9	-0.433035	0.139039	-3.11449	0.00184261	0.0239655
Eif3a	16079.4	0.0357242	0.0764336	0.467389	0.640221	0.831836
Rpl37a	16420.9	-0.0567453	0.106703	-0.531804	0.594862	0.805481
Ddx21	15847.9	-0.0575975	0.0799648	-0.720286	0.471349	0.722698
Coro1a	16174.8	0.0425349	0.0843123	0.504492	0.613915	0.816629
Rplp2	16065.7	0.107395	0.0893347	1.20217	0.229298	0.493667
Eif4b	15717.3	-0.0171644	0.0461544	-0.371891	0.709974	0.87038
Rpl28	16205.2	0.0376916	0.0564464	0.667741	0.504299	0.747718
Ipo5	15399	0.0793863	0.0538611	1.47391	0.140507	0.375847
Eif3c	15381.4	-0.0756128	0.07277	-1.03907	0.298774	0.570401
Cct8	15086.3	-0.110965	0.051175	-2.16835	0.0301323	0.149716
Rps13	15361.1	-0.0713431	0.0684282	-1.0426	0.297134	0.568476
Rps11	15237.7	0.0578019	0.0694313	0.832506	0.405124	0.669508
Naca	14663.6	-0.098334	0.0882316	-1.1145	0.265066	0.53309
Myh9	14417.4	0.28154	0.0953527	2.95262	0.00315092	0.0339951
Rpl27	14584	-0.0788492	0.0953334	-0.827089	0.408186	0.671951
Cct2	14415.8	-0.00199689	0.0567292	-0.0352003	0.97192	0.989145
Srrm2	14359.2	0.0598252	0.0793425	0.754012	0.450842	0.706386
Calm1	14237.4	0.110683	0.0620321	1.78428	0.0743777	0.257464
G3bp1	14324.8	0.140797	0.0611352	2.30304	0.0212765	0.121074
Rcc2	14376.8	0.0293932	0.0518076	0.567353	0.570474	0.789889
Rpl29	13856.3	-0.356763	0.0839635	-4.24903	2.147e-05	0.00138834
Cct5	14097.1	-0.00199151	0.0444034	-0.0448504	0.964227	0.98651
Srsf1	13948.9	-0.0643003	0.0492081	-1.3067	0.191315	0.447011
Ddx3x	13726.8	-0.16607	0.0696733	-2.38355	0.0171463	0.10459
Tcp1	13806.8	-0.042137	0.0534793	-0.787912	0.430748	0.689254
Actr3	13859.5	0.0276424	0.0496018	0.557285	0.577333	0.794371
Tpm3	13810.6	0.182178	0.0493178	3.69397	0.000220781	0.00588232
Ccnd2	13785.1	0.284392	0.108246	2.62727	0.00860741	0.066667
Pa2g4	13796.1	0.00967854	0.0531417	0.182127	0.855483	0.943405
Rpl23	13963.7	-0.187843	0.102983	-1.82401	0.0681502	0.245028
Ptbp1	13637.6	0.154681	0.0531683	2.90927	0.00362276	0.0373394
Gbp2	14088.7	-0.620388	0.130586	-4.7508	2.02612e-06	0.000272939
Fasn	13440.9	0.465695	0.0879795	5.29323	1.20175e-07	3.46441e-05
Hmgb2	13557	-0.420116	0.0973975	-4.31342	1.60748e-05	0.00112476
Srsf3	13457.5	-0.173606	0.0886628	-1.95805	0.0502238	0.204095
Caprin1	13334	-0.0335678	0.0445803	-0.752974	0.451465	0.706637
Mki67	13090.9	0.0492724	0.0992658	0.496369	0.619634	0.820148
Gm23935	14549.6	0.218693	0.388152	0.563422	0.573147	0.791089
Calr	13209.7	0.0473091	0.0716722	0.660075	0.509205	0.751478
H3f3b	13075.7	-0.115111	0.0653059	-1.76264	0.0779614	0.264301
Nop56	13132.1	0.090793	0.0767676	1.1827	0.236928	0.502736
Prpf8	12889.6	0.184911	0.0918138	2.01398	0.0440118	0.188861
Slc25a3	13003.6	0.0864088	0.0627286	1.3775	0.168357	0.414901
Rpl36	13485.3	-0.0256338	0.103396	-0.247919	0.804197	0.917669
Cct7	13105.1	0.049071	0.0470982	1.04189	0.297464	0.568728
Fau	13054.8	-0.0155521	0.0639516	-0.243185	0.807862	0.919562
Cct6a	12664.1	-0.0696915	0.0657339	-1.06021	0.289051	0.558496
Anp32b	13147.7	-0.00899081	0.0679793	-0.132258	0.89478	0.959653
Arhgdia	13035	0.23432	0.0534152	4.38676	1.1505e-05	0.000901269
Il2ra	12746.6	-0.185439	0.196016	-0.946039	0.344129	0.61664
Shmt2	12838	0.202754	0.0633699	3.19954	0.00137649	0.0198734
Hnrnpf	12624.3	-0.0809552	0.0588041	-1.37669	0.168607	0.415082
Bzw1	12270.8	-0.147747	0.0601339	-2.45696	0.0140117	0.091639
Ubb	12648.2	-0.117312	0.0552216	-2.12439	0.0336375	0.159434
Hnrnpa0	12628.4	0.100928	0.0760368	1.32736	0.184389	0.438144
Rps27	12628.4	-0.185295	0.147065	-1.25996	0.207685	0.46877
Hnrnpl	12335.5	0.0797653	0.0353822	2.25439	0.0241716	0.131525
Rpl35	12347.5	-0.115626	0.13923	-0.83047	0.406273	0.670486
Cct4	11993.8	-0.0293699	0.0431501	-0.680644	0.496097	0.742394
mt-Nd6	11514.1	-0.550511	0.095728	-5.75079	8.88298e-09	5.56693e-06
Cct3	12025.6	0.0649216	0.0527904	1.2298	0.218772	0.48131
Nfkb1	11651	0.329685	0.0764215	4.31403	1.60305e-05	0.00112476
Rrm1	11737.9	-0.0226289	0.0666128	-0.339708	0.734076	0.883018
Ssrp1	11914.4	0.0325639	0.0513929	0.633626	0.526325	0.762687
Eif3b	11968.8	0.0482125	0.0595081	0.810183	0.417835	0.680144
Hnrnph1	11789.4	-0.176567	0.0673969	-2.61981	0.00879789	0.0676183
Btf3	11896.5	-0.162795	0.0661275	-2.46184	0.0138228	0.0910529
Mcm6	11890.4	0.154963	0.0580125	2.6712	0.00755814	0.0607941
Uba1	11757.1	0.166884	0.0664745	2.5105	0.0120559	0.083265
Ybx3	11692.6	0.252414	0.0734312	3.43742	0.000587282	0.0114069
Tardbp	11558.9	-0.0106504	0.064377	-0.165438	0.8686	0.948484
Atp1a1	11471.7	0.462565	0.0995799	4.64516	3.3981e-06	0.000395002
Rpl23a	12109.1	-0.0859548	0.129304	-0.664749	0.506211	0.749207
Mcm3	11585.9	0.0121247	0.0576853	0.210186	0.833522	0.933125
Dnmt1	11456.6	0.200228	0.0791669	2.52918	0.0114328	0.0804651
Canx	11468.8	-0.262638	0.0681582	-3.85336	0.000116509	0.00397011
H2afz	11507.8	-0.217037	0.11033	-1.96717	0.0491638	0.201671
Chd4	11271.8	0.0240311	0.0814699	0.294969	0.768018	0.899066
Ddb1	11162.4	0.150156	0.0679562	2.2096	0.0271328	0.141138
mt-Rnr1	11129.6	0.741566	0.307908	2.4084	0.0160227	0.0998923
Tkt	11257.2	0.0359894	0.0463866	0.775857	0.437833	0.695956
Etf1	10981.1	-0.146247	0.0549037	-2.66371	0.0077285	0.0618881
Ywhaz	10931.2	0.0236363	0.0648672	0.364381	0.715574	0.873436
Rpl22	10833.5	-0.124044	0.158002	-0.785081	0.432406	0.690681
Ywhae	10779.3	0.06702	0.0583245	1.14909	0.250519	0.516076
Phgdh	11097.5	0.0675204	0.0619199	1.09045	0.275516	0.544309
Pcbp1	11032.2	0.154384	0.067384	2.29111	0.0219571	0.123427
Msn	10769.2	0.241432	0.0670731	3.59954	0.000318782	0.00762011
Son	10561.8	0.201498	0.0637498	3.16077	0.00157353	0.0216152
Rbm3	10796.3	0.0365028	0.133246	0.27395	0.784123	0.907164
Eif4a2	10522.2	-0.204462	0.0692653	-2.95186	0.00315864	0.0340274
Sf3b1	10523.2	-0.0420623	0.0447388	-0.940175	0.347128	0.619098
Mbnl1	10047.6	0.121695	0.0696691	1.74675	0.08068	0.269819
Hnrnpm	10738.9	-0.0669741	0.0511611	-1.30908	0.190507	0.445845
Larp1	10653.4	0.204021	0.0750623	2.71803	0.00656722	0.0552436
Psat1	10652.6	-0.0022859	0.0698439	-0.0327287	0.973891	0.989753
Eif5	10269.7	0.2154	0.0586992	3.66956	0.000242967	0.00626497
Actr2	10406	-0.0657615	0.0594868	-1.10548	0.268951	0.537232
AI506816	10415.5	0.259885	0.0701085	3.7069	0.00020981	0.00576039
Hspa4	10423	0.0084359	0.0457375	0.184442	0.853667	0.942893
Nono	10495.2	-0.158323	0.0622933	-2.54157	0.0110357	0.0784478
Hsp90b1	10302.1	-0.33831	0.0708979	-4.77179	1.82598e-06	0.000252406
Cad	10198	0.455087	0.0938189	4.8507	1.23029e-06	0.000182818
Rpl36a	10465.8	-0.265457	0.21034	-1.26204	0.206935	0.467738
Xpo1	10036.1	-0.100146	0.0658999	-1.51967	0.128594	0.355224
Prdx1	10218.9	-0.0207854	0.120788	-0.172082	0.863373	0.946002
Sfpq	10233.2	0.0894658	0.0629741	1.42068	0.155411	0.396827
Ly6a	10500.4	-0.00164215	0.131575	-0.0124807	0.990042	0.996054
Prrc2a	10208.3	0.317464	0.0816625	3.88751	0.000101276	0.00365864
Nolc1	10172.3	-0.054224	0.0839713	-0.645745	0.518445	0.757589
Hdgf	10223.4	0.0275239	0.0641292	0.429195	0.667781	0.847122
Snx5	9851.73	-0.0755665	0.0508457	-1.48619	0.137228	0.370691
Rps29	10508.7	0.0102782	0.120825	0.0850662	0.932209	0.975523
Nop58	9873.45	-0.0821707	0.0662992	-1.23939	0.2152	0.476775
Pdia3	9848.07	0.0106432	0.048213	0.220754	0.825284	0.929382
Tmsb10	10329.5	-0.0672469	0.097612	-0.688921	0.490873	0.738641
Sf3b3	9750.07	-0.0416089	0.0772057	-0.538936	0.589931	0.802725
Dhx9	9668.37	0.011554	0.0598717	0.192979	0.846975	0.939212
Tfdp1	9636.08	0.162736	0.052177	3.11891	0.00181518	0.0237855
Rpl39	9873.96	-0.138816	0.137294	-1.01109	0.311974	0.583557
Eprs	9739.08	-0.0286671	0.0811085	-0.353441	0.723758	0.877555
Mcm5	9811.82	0.0892075	0.0513498	1.73725	0.0823426	0.27335
Cdv3	9689.65	-0.168039	0.0617338	-2.722	0.00648885	0.0547922
Eif1	9538.22	-0.0257816	0.0791354	-0.325791	0.744583	0.887733
Uhrf1	9687.54	0.324053	0.0736139	4.40206	1.07225e-05	0.000853894
Hnrnpc	9666.63	-0.229777	0.0540153	-4.25392	2.10059e-05	0.001378
Vars	9754.48	0.196857	0.0616377	3.19378	0.00140425	0.0200802
Mcm7	9704.35	0.0340541	0.0537087	0.634052	0.526047	0.762623
Smc4	9383.05	-0.0898401	0.0721208	-1.24569	0.212879	0.47367
Pfkp	9795.68	-0.358456	0.126049	-2.84378	0.0044582	0.0424722
Hspe1	9420.86	-0.265962	0.096739	-2.74927	0.00597282	0.0519566
Rpl37	9534.61	-0.0961323	0.104294	-0.92174	0.356664	0.627957
Srsf2	9316.24	0.0856059	0.0476854	1.79522	0.0726182	0.254239
CT010467.1	9891.45	0.115428	0.260985	0.442281	0.658286	0.841546
Trim28	9445.56	0.0863437	0.0582412	1.48252	0.138202	0.372144
Rpl30	9512.19	-0.0421387	0.500156	-0.0842511	0.932857	0.975694
Slc1a5	9544.1	-0.128975	0.0561565	-2.29671	0.0216352	0.122539
Ipo7	9228.83	-0.0314454	0.055952	-0.562007	0.574112	0.791574
P4hb	9432.98	-0.126814	0.0700377	-1.81066	0.0701943	0.249514
Ube2d3	9198.8	0.00345015	0.0355508	0.0970485	0.922688	0.971414
Srsf6	9114.82	0.162297	0.0748142	2.16934	0.0300568	0.149528
Eif3e	9078.06	-0.0818842	0.144386	-0.56712	0.570633	0.789889
Sept7	8947.79	-0.100123	0.114747	-0.872553	0.382907	0.650271
Pabpc4	9233.13	0.126	0.0650558	1.9368	0.0527702	0.210935
Anapc5	9127.25	0.163762	0.0472092	3.46885	0.000522691	0.0105723
Rpl17	9250.41	0.158336	0.37366	0.423742	0.671754	0.848812
Nsun2	8980.06	-0.0439294	0.0409834	-1.07188	0.283772	0.552423
Agfg1	8769.76	0.00855842	0.0850655	0.10061	0.91986	0.970596
Gpi1	9206.34	-0.264521	0.094054	-2.81243	0.00491683	0.0456056
Abce1	8763.37	-0.0564494	0.0591805	-0.953851	0.340159	0.613401
Eif2s2	8932.55	-0.138763	0.0988141	-1.40428	0.160235	0.403007
Rps21	9120.9	-0.03689	0.142594	-0.258706	0.795862	0.913777
Vcp	8890.81	0.0485406	0.0754322	0.643499	0.5199	0.758716
Rap1b	8625.69	0.185851	0.0484901	3.83276	0.000126713	0.00416047
Slfn2	8918.24	0.0288178	0.129571	0.222409	0.823995	0.928476
Itgal	8566.9	0.438097	0.122018	3.59044	0.000330122	0.0077372
Huwe1	8588.73	0.224618	0.080429	2.79275	0.0052262	0.0472292
Rsl1d1	8644.02	-0.181183	0.0650037	-2.78727	0.00531543	0.0477786
Hdlbp	8645.74	-0.0691222	0.08908	-0.775957	0.437774	0.695939
Rbm39	8548.36	-0.200347	0.0528505	-3.79082	0.000150151	0.00468239
Cd53	8499.65	-0.344591	0.107528	-3.20467	0.00135218	0.0197208
Paics	8580.71	-0.185981	0.0529148	-3.51472	0.000440213	0.00935874
Irf8	8495.72	0.52853	0.128256	4.12088	3.77422e-05	0.00191354
Mat2a	8405.05	-0.00833938	0.0595883	-0.13995	0.888699	0.956591
Gars	8541.45	0.0240821	0.0593414	0.405823	0.684872	0.858637
Kpna2	8208.8	-0.219268	0.0967975	-2.26523	0.0234987	0.12923
Psme3	8239	0.121892	0.0604144	2.01761	0.0436324	0.187793
Fkbp4	8481.65	-0.06069	0.0567822	-1.06882	0.285151	0.553719
Tmpo	8217.49	0.00123014	0.0385912	0.0318761	0.974571	0.989858
Syncrip	8141.81	-0.124985	0.0595196	-2.09989	0.0357383	0.165584
Cdc42	8156.83	0.100204	0.0616856	1.62443	0.104285	0.313682
Psmd2	8261.89	0.0898002	0.0546025	1.64462	0.100048	0.305788
Pgam1	8343.21	-0.195409	0.0949309	-2.05843	0.0395489	0.175889
Acly	8281.01	0.131263	0.0637224	2.05993	0.0394056	0.175415
Ddx39b	8296.32	0.00376238	0.0501145	0.0750756	0.940155	0.977638
Rpl35a	8324.01	-0.155702	0.135701	-1.14739	0.251221	0.516912
Stip1	8283.14	0.0100014	0.0543267	0.184097	0.853937	0.943097
Rac2	8102.75	0.184259	0.0680426	2.708	0.00676904	0.0563056
Shisa5	8321.43	-0.102255	0.0739431	-1.38289	0.1667	0.412429
Eif4h	8192.34	0.111711	0.0623417	1.79192	0.0731465	0.254997
Fus	8169.63	-0.037632	0.0779233	-0.482936	0.629141	0.825708
Rpl38	8404.32	-0.112043	0.15996	-0.700448	0.483647	0.733107
Ewsr1	8244.18	-0.0576947	0.0612412	-0.94209	0.346147	0.618353
Prmt1	8020.5	-0.0175118	0.0520257	-0.336599	0.736419	0.883973
Atf4	8415.48	-0.34557	0.0832283	-4.15207	3.2948e-05	0.00179845
Nars	8196.75	-0.145061	0.0759814	-1.90916	0.0562408	0.218978
Cdk4	8058.29	-0.0366468	0.048502	-0.755573	0.449905	0.705651
Tagln2	8012.2	0.214903	0.065724	3.26979	0.00107629	0.0168627
Ivns1abp	7805.7	0.0832078	0.0667516	1.24653	0.21257	0.473276
Cd6	7971.59	-0.128758	0.124602	-1.03335	0.301439	0.573135
Mcm4	7935.7	0.14621	0.0644207	2.26961	0.0232315	0.128348
Srm	7891.33	0.2733	0.0741162	3.68745	0.00022651	0.00599066
Prrc2c	7849.09	0.119242	0.10641	1.12059	0.262462	0.530008
Trbc2	7869.12	-0.276409	0.0995088	-2.77773	0.00547397	0.0486995
Il2rb	7792.99	0.194162	0.123321	1.57445	0.115383	0.334366
Slc7a5	7856.94	0.24452	0.0873878	2.7981	0.00514036	0.0467278
Oaz1	7907.52	0.287991	0.094435	3.04962	0.00229135	0.0277309
Hcfc1	7684.06	0.282609	0.0889987	3.17542	0.00149618	0.0209717
Tap1	7898.36	0.00949105	0.0535916	0.177099	0.85943	0.944543
Eif3l	7819.78	-0.0686152	0.0576053	-1.19113	0.233604	0.49884
Igtp	7815.18	0.0268498	0.0667537	0.402222	0.687521	0.859961
Thrap3	7621.42	0.100904	0.0703724	1.43385	0.151614	0.392101
Rbbp7	7541.26	-0.0283096	0.0428458	-0.660732	0.508784	0.751283
Sf1	7736.94	0.0278748	0.0528834	0.5271	0.598124	0.807473
Gas5	7640.12	-0.415546	0.0990161	-4.19675	2.70771e-05	0.00158654
Ptp4a2	7427.53	-0.0736267	0.0481031	-1.5306	0.125868	0.350513
Tnpo1	7384.04	-0.0367289	0.070266	-0.522712	0.601175	0.809012
Rps12-ps3	7521.74	-0.25435	0.216351	-1.17564	0.239741	0.505134
Nup210	7506.46	0.147435	0.0590232	2.49792	0.0124926	0.0851386
Fbl	7617.94	-0.00985862	0.0556026	-0.177305	0.859269	0.944521
Tubb4b	7424.17	0.04433	0.0660616	0.67104	0.502195	0.746328
Cap1	7345.78	0.125087	0.0649924	1.92464	0.054274	0.21433
Dhx15	7296.79	-0.00704642	0.0518629	-0.135866	0.891927	0.957928
Anp32e	7342.7	-0.193913	0.0632219	-3.06718	0.00216089	0.0267337
Mcm2	7363.97	0.12888	0.0492692	2.61582	0.00890126	0.0682678
Flna	7288.33	0.270511	0.0996912	2.71349	0.00665777	0.0558007
Arf1	7458.94	0.0964148	0.0539186	1.78816	0.0737508	0.256093
Rpl7a	7422.72	-0.021044	0.133206	-0.157981	0.874472	0.950934
Srsf7	7330.09	0.0322743	0.0831685	0.388059	0.697972	0.864701
Eef1d	7407.75	0.0382679	0.0559289	0.684225	0.493833	0.74093
Kars	7425.6	-0.0316747	0.059712	-0.530457	0.595795	0.805874
Srebf2	7443.8	0.112568	0.0670274	1.67943	0.0930685	0.29213
Fam120a	7162.61	0.0963913	0.0671565	1.43532	0.151195	0.391479
Cnot1	7221.62	-0.0170741	0.0948556	-0.180001	0.857152	0.943848
Dek	7224.94	-0.174307	0.0537695	-3.24175	0.00118798	0.0179869
Srgn	7151.42	-0.340604	0.114391	-2.97753	0.00290581	0.0324937
Nucks1	7226.92	0.056495	0.0579853	0.974299	0.329908	0.603387
Cbx5	7329.57	0.183622	0.0556656	3.29867	0.000971457	0.0157509
Snrnp200	7173.3	0.0705377	0.0918738	0.767767	0.442625	0.700231
U2af2	7366.32	0.0172962	0.0571821	0.302476	0.762289	0.896396
C1qbp	7349.98	0.0358712	0.0618437	0.580029	0.561895	0.784118
Smarca5	7168.96	-0.090762	0.0556136	-1.63201	0.102677	0.310857
Arpc2	7149.08	-0.0304141	0.0448786	-0.677696	0.497964	0.744107
Bclaf1	7170.8	0.00584451	0.0687372	0.0850269	0.93224	0.975523
Csde1	7103.04	-0.0970374	0.047075	-2.06134	0.039271	0.175209
Gspt1	7095.28	0.0202104	0.0562161	0.359513	0.719211	0.875123
Tln1	7061.21	0.299085	0.0911729	3.28041	0.00103655	0.0164909
Wdr43	7061.32	-0.0593423	0.054411	-1.09063	0.275436	0.544301
Smc1a	7144.43	0.0284297	0.0628162	0.452585	0.650847	0.837714
Rab8b	6897.47	0.15143	0.0971564	1.55862	0.119087	0.340364
Lck	7148.31	-0.0993873	0.0656087	-1.51485	0.129811	0.357094
Noc2l	7093.9	0.17116	0.0526928	3.24826	0.00116115	0.0177485
Ikzf1	7046.98	-0.126921	0.0811205	-1.5646	0.117678	0.337754
Prkar1a	6942.03	0.106121	0.0498085	2.13057	0.0331246	0.158466
Cd5	6940.05	-0.052517	0.140012	-0.375089	0.707595	0.869281
Sf3b2	7121.5	0.0092782	0.0516906	0.179495	0.857549	0.943853
Ahcy	7007.18	-0.0592202	0.062422	-0.948706	0.34277	0.615202
Satb1	7070.78	-0.58198	0.281016	-2.07098	0.0383602	0.172519
Chchd2	7152.8	-0.00230429	0.109702	-0.021005	0.983242	0.992539
Topbp1	6877.24	0.0496825	0.0564338	0.880367	0.37866	0.646664
Matr3	6914.98	-0.0488724	0.0895979	-0.545464	0.585434	0.79955
Phb2	7010.73	-0.00357285	0.0634256	-0.0563313	0.955078	0.982397
Eif3h	6986.74	0.0807869	0.0513556	1.57309	0.115699	0.335078
Atp2a2	6810.02	0.19267	0.0782268	2.46297	0.0137791	0.0908979
Ppp1ca	6997.38	0.00756378	0.05036	0.150194	0.880611	0.953411
Eif2s1	6846.37	-0.056217	0.0774627	-0.72573	0.468004	0.720398
Hnrnpdl	6945.83	-0.23882	0.0845791	-2.82363	0.00474838	0.0444436
Csnk1a1	6787.61	0.0242901	0.0450851	0.538761	0.590052	0.802735
Txn1	6917.03	0.140603	0.0792196	1.77486	0.0759215	0.259929
Aebp2	6685.08	0.201103	0.0529435	3.79845	0.000145606	0.00460255
Arhgef1	6865.72	-0.0276615	0.069056	-0.400566	0.68874	0.860641
Actn4	6716	0.29139	0.0655955	4.44222	8.90362e-06	0.000750508
Psme1	6795.59	-0.02695	0.0526795	-0.511585	0.608942	0.81362
Ccdc50	6557.67	0.441832	0.125505	3.52043	0.00043084	0.00920018
Snu13	6741.96	-0.041538	0.0792825	-0.523924	0.600331	0.808484
Lcp2	6500.42	-0.21614	0.128935	-1.67635	0.093669	0.293191
Eif3i	6693.38	-0.0779608	0.0562999	-1.38474	0.166132	0.411448
Cltc	6574.9	-0.000867953	0.0622802	-0.0139363	0.988881	0.995337
Myc	6659.23	0.255239	0.0521137	4.89773	9.69493e-07	0.000150261
Baz1b	6661.54	0.028721	0.0641245	0.447895	0.654229	0.83987
Tomm70a	6604.23	-0.0872421	0.0501681	-1.739	0.0820353	0.27277
2610507B11Rik	6614.74	0.000575043	0.0796991	0.00721517	0.994243	0.997382
Snrpb	6715.53	0.0237979	0.0556865	0.427355	0.669121	0.847214
Iars	6524.64	0.149226	0.073228	2.03783	0.0415668	0.181492
Nup205	6494.56	0.0450966	0.0733656	0.614683	0.538764	0.770144
Nasp	6659.83	-0.145189	0.0776952	-1.8687	0.0616643	0.231768
Tcof1	6644.83	0.0784165	0.0825689	0.94971	0.34226	0.614755
Ucp2	6592.22	0.264959	0.0835503	3.17125	0.00151787	0.0212207
Naa50	6500.99	0.0182635	0.0515435	0.354331	0.723091	0.877252
Usp1	6538.04	-0.0184681	0.0479998	-0.384753	0.700421	0.865818
Rbbp4	6476.11	0.00471467	0.0525244	0.0897616	0.928477	0.974104
Gm10275	6726.06	0.0143098	0.12249	0.116824	0.906999	0.964423
Mcl1	6591.45	0.0212991	0.0546035	0.390068	0.696486	0.864295
Rrm2	6453.92	0.084888	0.0703537	1.20659	0.227591	0.49168
Cse1l	6381.65	0.0148724	0.0713509	0.20844	0.834885	0.933667
Eif3m	6477.02	-0.183726	0.137865	-1.33265	0.182647	0.435072
Mknk2	6583.98	0.235299	0.0806719	2.91675	0.00353703	0.0367047
Ddx39	6550.64	-0.166868	0.0634	-2.63199	0.00848853	0.0662087
Psma7	6541.12	-0.056803	0.103691	-0.54781	0.583822	0.798483
Ssb	6489.08	-0.153431	0.081574	-1.88088	0.0599886	0.227367
Eif4a-ps4	6482.16	-0.202702	0.103365	-1.96103	0.0498754	0.203126
Gart	6380.32	0.138817	0.0750249	1.85028	0.0642739	0.236037
Slc7a1	6477.77	0.115975	0.0920391	1.26006	0.207648	0.46877
Tra2b	6408.12	-0.156806	0.0610002	-2.57058	0.0101528	0.0743525
Bsg	6464.49	-0.158788	0.0807541	-1.96631	0.0492625	0.201845
Pik3cd	6368.41	-0.0923716	0.0878851	-1.05105	0.293236	0.564012
Itk	6302.22	0.0708541	0.106192	0.667227	0.504627	0.747938
Pcbp2	6361.29	-0.0277854	0.0536862	-0.517552	0.604771	0.811428
Mdh2	6315.95	0.173314	0.0584061	2.9674	0.00300325	0.0330838
Cyfip2	6311.84	-0.12312	0.0977791	-1.25917	0.20797	0.469088
Malat1	6351.7	-0.123852	0.126118	-0.982034	0.326083	0.598747
Ghitm	6348.51	-0.105596	0.0877075	-1.20396	0.228606	0.492748
Sub1	6311.92	-0.253599	0.100631	-2.5201	0.011732	0.0818659
Maz	6424.89	0.109391	0.046713	2.34177	0.0191926	0.112869
Fkbp1a	6329.58	0.176089	0.0632015	2.78615	0.00533378	0.0478414
Mthfd2	6295.36	0.069819	0.0894387	0.780635	0.435017	0.693238
Tpr	6195.74	0.119157	0.0557738	2.13643	0.0326443	0.156897
Supt16	6241.6	0.0452783	0.0892938	0.507071	0.612105	0.815423
Gdi2	6178.58	-0.116466	0.0681065	-1.71006	0.0872557	0.28244
Ranbp2	6134.27	0.0677021	0.0634279	1.06739	0.285798	0.554562
Rbpj	6111.17	-0.104053	0.218967	-0.475197	0.634647	0.829056
Eftud2	6230.44	0.0653869	0.0628492	1.04038	0.298164	0.569601
Atp5f1	6316.32	-0.0867071	0.0801218	-1.08219	0.279168	0.548069
Heatr1	6131.39	-0.0469788	0.0790455	-0.594326	0.552294	0.778255
Fubp1	6293.89	0.0461033	0.0684225	0.673803	0.500437	0.74541
Gnl3	6148.67	-0.135946	0.0598227	-2.27248	0.0230574	0.127581
Wdr1	6107.88	0.0086242	0.0701007	0.123026	0.902087	0.962876
Uba2	6156.56	-0.010908	0.0427291	-0.255283	0.798505	0.915237
Ptpn6	6191.37	0.0793548	0.0700001	1.13364	0.256946	0.524124
Hdac7	6161.29	0.158642	0.124475	1.27449	0.202491	0.461966
Cs	6170.81	0.0142387	0.066337	0.214642	0.830047	0.931218
Aars	6235.32	-0.0683651	0.0797	-0.85778	0.391014	0.657601
Snrnp70	6246.85	-0.150912	0.061079	-2.47077	0.0134821	0.0896359
Srsf11	5975.49	-0.0905752	0.0442149	-2.04852	0.040509	0.178344
Thy1	5987.42	0.253175	0.138585	1.82686	0.0677204	0.24403
Srsf10	6012.09	-0.0221609	0.0548645	-0.40392	0.686272	0.859201
Dkc1	6020.14	-0.0404599	0.0639384	-0.632795	0.526867	0.762858
Rpl17-ps3	5807.39	0.0204302	0.142462	0.143407	0.885968	0.955741
Capzb	6050.44	0.0530088	0.0411492	1.28821	0.197673	0.455154
Ddx6	6076.44	0.0450203	0.077909	0.577858	0.56336	0.785478
Nfkb2	5999.25	0.553171	0.10257	5.3931	6.92511e-08	2.49546e-05
Copa	5980.08	0.188646	0.062331	3.02651	0.00247391	0.0291331
Cacybp	5959.86	-0.23444	0.0928926	-2.52378	0.0116102	0.0813956
Suz12	5955.01	0.0151416	0.0413968	0.365768	0.714538	0.872975
Limd2	6114.69	0.15235	0.08628	1.76576	0.0774361	0.263246
Anp32a	6230.45	-0.167816	0.0697224	-2.40691	0.016088	0.100126
Mlec	5983.11	0.0770798	0.0510071	1.51116	0.130748	0.359041
Mdn1	5923.74	0.396339	0.0968356	4.09291	4.26e-05	0.00203999
Pds5a	5874.85	0.0402366	0.0570113	0.705765	0.480334	0.730562
Impdh2	6037.44	0.0816645	0.0498226	1.63911	0.101191	0.307957
Papola	5879.17	0.0482232	0.0414983	1.16205	0.245214	0.510309
Khsrp	6083.27	0.179228	0.0594677	3.01387	0.00257936	0.0297908
Gm42047	5677.38	-0.025873	0.432052	-0.0598839	0.952248	0.981351
Slc38a1	5935.96	-0.169626	0.0964686	-1.75835	0.0786877	0.265808
Brd2	6036.91	0.114768	0.0470422	2.43969	0.0146998	0.0946748
Rpl21	6104.5	0.00854744	0.30552	0.0279767	0.977681	0.991298
Eif3f	6028.9	0.243912	0.0542934	4.49248	7.0398e-06	0.000630259
Pclaf	5913.58	-0.0956562	0.0473896	-2.0185	0.0435387	0.187501
Lig1	6036.82	0.223001	0.0560079	3.9816	6.84515e-05	0.00276736
Rad23b	6014.03	-0.137321	0.0697997	-1.96736	0.0491418	0.201671
Ifi47	6102.6	-0.100498	0.0858616	-1.17047	0.241813	0.506907
Ppp1cc	5974.03	-0.0541262	0.0513262	-1.05455	0.29163	0.562199
Atxn2l	6094.84	0.0472635	0.0735579	0.642535	0.520526	0.759028
Strap	5845.46	-0.0203003	0.0588583	-0.344901	0.730169	0.88099
Rangap1	5939.34	0.109881	0.07686	1.42963	0.152825	0.39357
Arpc1b	6039.1	-0.00843211	0.0580783	-0.145185	0.884565	0.955726
Pum2	5777.73	-0.0281405	0.0559772	-0.502714	0.615166	0.817461
Capza1	5817.88	-0.0271652	0.0618515	-0.439201	0.660516	0.842463
Lmnb1	5922.41	0.102636	0.0596414	1.72088	0.0852723	0.279053
Macf1	5765.41	0.15223	0.0940288	1.61897	0.105454	0.316076
Hnrnpul1	5966.82	0.0388881	0.0682221	0.570022	0.568663	0.788994
Polr2a	5850.34	0.409856	0.101216	4.04933	5.13654e-05	0.00232824
Ezh2	5858.4	0.0208625	0.0467794	0.445976	0.655614	0.840635
Iqgap1	5747.48	0.211098	0.0870794	2.42419	0.0153424	0.0972105
Hif1a	5902.29	-0.0917943	0.144343	-0.635946	0.524812	0.762411
Hnrnpul2	5898.71	0.0527099	0.0686858	0.767407	0.44284	0.700236
Atad2	5728.85	0.218692	0.0903217	2.42126	0.0154668	0.097684
Zfp207	5768.78	-0.129893	0.0681477	-1.90605	0.0566441	0.220013
Rps28	6116.48	-0.148639	0.107098	-1.38788	0.165173	0.409832
Btla	5661.69	-0.196555	0.111164	-1.76816	0.0770346	0.26225
Ncapd2	5806.28	-0.22322	0.115962	-1.92493	0.054238	0.214305
Atic	5778.1	0.205592	0.0716464	2.86954	0.00411071	0.0402591
Gls	5656.75	-0.00375944	0.060503	-0.0621365	0.950454	0.981351
Ly6e	5712.71	0.359019	0.111256	3.22698	0.00125104	0.0186211
Hnrnpd	5802.84	-0.128375	0.0615674	-2.08512	0.0370582	0.168728
Ppm1g	5779.43	0.0679617	0.0547432	1.24147	0.214434	0.475589
Sept11	5698.87	0.298959	0.0673379	4.43969	9.00894e-06	0.000752691
Hmgn2	5621.26	0.0185467	0.0866631	0.214009	0.83054	0.931626
Phb	5766.28	0.0857403	0.0862961	0.993559	0.320438	0.593751
Gm6136	5716.62	-0.205572	0.11853	-1.73435	0.0828562	0.274423
Ptges3	5675.15	-0.177156	0.0725617	-2.44145	0.0146282	0.0942983
Ppp2ca	5608.34	0.0295906	0.0503855	0.587284	0.557013	0.781467
Rad21	5665.58	-0.270498	0.0812319	-3.32995	0.0008686	0.0146776
Mthfd1	5681.32	0.234239	0.0765227	3.06104	0.00220573	0.0269436
Hmgn1	5745.06	-0.183518	0.0766633	-2.39382	0.0166739	0.102621
Cd52	5758.41	-0.042134	0.117725	-0.357902	0.720417	0.875555
Metap2	5616.62	-0.154913	0.0537184	-2.88379	0.0039292	0.0391063
Ywhah	5665.17	0.293444	0.0501377	5.85276	4.83477e-09	3.56473e-06
Psma1	5693.36	-0.101574	0.0905205	-1.12212	0.261813	0.52943
Gbp4	5687.27	-0.390478	0.112082	-3.48386	0.00049424	0.0102228
Samhd1	5927.56	-0.392082	0.203272	-1.92885	0.053749	0.213114
Psma4	5679.86	-0.024348	0.116592	-0.20883	0.834581	0.933399
Rbm25	5617.56	-0.171109	0.0551442	-3.10294	0.00191608	0.0245496
Ccng1	5214.18	0.396842	0.212736	1.86542	0.0621226	0.232665
Rrp1	5631.73	-0.141554	0.0674259	-2.09941	0.0357809	0.165679
Nup153	5479.19	0.160472	0.0696593	2.30367	0.0212414	0.120946
Rgs1	5255.3	-0.0949471	0.242263	-0.391917	0.69512	0.864047
Ppid	5552.1	-0.0873975	0.0576921	-1.51489	0.129799	0.357094
Grk2	5591.14	0.125358	0.0747466	1.67711	0.0935217	0.292984
Dnaja1	5695.07	-0.0445707	0.0714145	-0.624113	0.532553	0.766233
Wnk1	5492.7	0.462477	0.075578	6.1192	9.40454e-10	1.04275e-06
Lrmp	5468.49	-0.0624942	0.140699	-0.444169	0.65692	0.841226
Morf4l2	5603.04	-0.102183	0.0808516	-1.26383	0.20629	0.467284
Prpf19	5551.37	0.0328982	0.0503211	0.653766	0.513263	0.7543
Sars	5681.52	-0.108148	0.076246	-1.4184	0.156073	0.397532
Gm9794	5639.59	-0.126361	0.0980621	-1.28858	0.197543	0.455
Trbc1	5470.64	-0.297436	0.122918	-2.4198	0.0155291	0.0978732
Adss	5563.44	-0.153271	0.0787698	-1.94581	0.0516772	0.208275
Hells	5413.2	-0.00794985	0.0697862	-0.113917	0.909303	0.965645
M6pr	5517.13	0.0367069	0.0613284	0.59853	0.549486	0.776576
Gm6472	5642.97	-0.0987931	0.224235	-0.440578	0.659519	0.841884
Clic4	5681.06	0.225519	0.211001	1.06881	0.285157	0.553719
Eif4enif1	5532.89	-0.261164	0.0863563	-3.02426	0.00249245	0.0292797
Nhp2	5626.81	-0.134885	0.0922555	-1.46208	0.143718	0.38101
Itgb1	5307.09	0.181279	0.106535	1.70159	0.0888315	0.284915
Mta2	5518.53	-0.0239495	0.0608274	-0.39373	0.693781	0.863571
Srsf5	5574.8	0.0101464	0.0766731	0.132333	0.894721	0.959653
Dut	5480.13	-0.0894332	0.065119	-1.37338	0.169634	0.416756
Rpa1	5464.4	0.0398433	0.0538474	0.739931	0.459342	0.712579
Pfas	5463.5	0.133156	0.0812538	1.63877	0.101262	0.308059
Rps10-ps2	5562.04	-0.0872337	0.108052	-0.807331	0.419476	0.681276
Tpm4	5456.72	0.00674604	0.0747712	0.0902225	0.92811	0.974104
Ablim1	5478.74	-0.401806	0.110057	-3.65089	0.000261331	0.00655101
Ubr4	5391.46	0.228444	0.094957	2.40577	0.0161386	0.100268
Vdac2	5335.14	-0.058628	0.0623252	-0.940679	0.34687	0.618938
Psma2	5469.96	-0.101294	0.085794	-1.18066	0.237737	0.503636
Ide	5380.68	0.0110737	0.217665	0.0508751	0.959425	0.983931
Naa15	5278.18	0.0746908	0.0444212	1.68142	0.0926811	0.291619
Api5	5335.4	0.0793185	0.0480061	1.65226	0.0984823	0.30267
Psmb4	5466.3	-0.000527729	0.0641044	-0.00823234	0.993432	0.997306
Eif2s3x	5350.51	0.0016706	0.0824628	0.0202589	0.983837	0.992539
Nampt	5512.6	-0.198576	0.0830323	-2.39155	0.0167775	0.103116
Ftsj3	5466.02	-0.112187	0.0819677	-1.36867	0.171102	0.418739
Acin1	5459.53	-0.0158828	0.0495613	-0.320468	0.748613	0.889355
Pdia6	5434.27	-0.176546	0.0646702	-2.72994	0.00633449	0.0539513
Myl6	5534.17	-0.190999	0.131951	-1.4475	0.147757	0.387015
Ube2i	5350.31	-0.0245777	0.046659	-0.526751	0.598366	0.807473
Prelid1	5369.51	-0.192827	0.0999414	-1.9294	0.0536816	0.213041
Serpinb9	5114.22	0.456348	0.156584	2.9144	0.00356371	0.0369283
Ptprcap	5404.19	-0.11309	0.0987434	-1.14529	0.25209	0.51798
Vdac1	5348.23	-0.0502533	0.0480424	-1.04602	0.295551	0.566952
Ubtf	5386.9	0.060956	0.0581807	1.0477	0.294776	0.565993
Srrt	5324.44	-0.0412944	0.0533693	-0.773749	0.439079	0.697152
Srrm1	5257.36	0.175518	0.0623257	2.81614	0.00486042	0.0452572
Stmn1	5376.74	-0.00424233	0.0682146	-0.062191	0.950411	0.981351
Pim2	5314.65	0.439599	0.0686842	6.40029	1.55082e-10	2.64423e-07
Mogs	5390.33	0.0316731	0.0811225	0.390435	0.696215	0.864295
Hjurp	5338.19	-0.214058	0.0888262	-2.40985	0.015959	0.0997538
Smc2	5189.14	-0.0969441	0.0614116	-1.5786	0.114429	0.333005
H2afy	5319.53	-0.0485575	0.057745	-0.840894	0.400407	0.665683
Arhgdib	5274.77	-0.349329	0.0792432	-4.40831	1.04178e-05	0.000838898
Gnb1	5241.98	0.0672245	0.056181	1.19657	0.231475	0.495982
Gnai2	5286.92	0.312608	0.0878148	3.55986	0.00037105	0.00825357
Trip12	5231.09	-0.0263757	0.0704243	-0.374525	0.708014	0.869286
Ets1	5290.86	-0.171926	0.0917117	-1.87464	0.0608423	0.229448
Slc16a1	5225	-0.0150419	0.052297	-0.287624	0.773635	0.90142
Erh	5253.74	-0.166558	0.0678486	-2.45485	0.0140942	0.0919662
Celf1	5249.95	0.0352742	0.0728085	0.484479	0.628046	0.824941
Mapk1	5176.47	0.111776	0.0594878	1.87898	0.0602475	0.227988
Serinc3	5266.83	-0.271193	0.0890601	-3.04506	0.00232637	0.0279436
Gramd1b	5130.51	0.359543	0.117966	3.04785	0.00230487	0.0278245
Inpp4b	5057.49	-0.252091	0.135454	-1.86108	0.0627328	0.23335
Ubap2l	5261.33	0.207278	0.0599756	3.45604	0.000548169	0.0109436
Dars	5223.05	-0.114997	0.0790254	-1.45519	0.145617	0.384131
Birc6	5100.46	0.233674	0.0919457	2.54144	0.0110398	0.0784478
Mob1a	5149.84	0.220812	0.0666363	3.31368	0.000920768	0.0152239
Zfp106	5189.39	0.0813059	0.0488772	1.66347	0.0962181	0.298326
Khdrbs1	5227.58	0.0433427	0.0540786	0.801477	0.422856	0.68341
Arpc5	5118.52	0.015226	0.0507264	0.30016	0.764055	0.897363
Rpn1	5229.93	-0.0877684	0.0571822	-1.53489	0.124811	0.348987
Junb	5368.79	0.208701	0.121341	1.71996	0.08544	0.279259
Parp1	5196.5	0.282494	0.0683171	4.13503	3.54905e-05	0.00188074
Csk	5219.21	0.0931073	0.053554	1.73857	0.0821106	0.272802
Laptm5	5068.34	0.0374548	0.0688366	0.544111	0.586365	0.800215
Tars	5204	-0.217201	0.068158	-3.18673	0.00143893	0.0204142
Atp5g3	5327.56	0.0531952	0.0649449	0.819083	0.412739	0.675741
Luc7l2	5067.27	-0.0700193	0.0601979	-1.16315	0.244768	0.50984
Dnaja2	5132.38	-0.123054	0.0625264	-1.96803	0.0490649	0.201626
Lat	5137.05	-0.302873	0.103729	-2.91985	0.00350202	0.0364726
Gm26917	5222.29	0.879021	0.255374	3.4421	0.000577222	0.0112891
Ptbp3	5063.76	-0.0489608	0.0485956	-1.00751	0.313688	0.585057
Tmbim6	5192.9	0.126954	0.0721524	1.75953	0.078488	0.26532
Raly	5176.92	0.122766	0.0658751	1.86362	0.0623751	0.2328
Jak2	5065.85	-0.204459	0.0965078	-2.11857	0.0341265	0.160909
Anapc1	5036.41	0.0910761	0.0794895	1.14576	0.251893	0.517797
Lars	5177.58	-0.11331	0.0803197	-1.41073	0.158323	0.400082
Sdha	5132.11	0.134205	0.0521759	2.57217	0.0101064	0.0741339
Zmiz2	5171.44	0.261205	0.0822632	3.17524	0.00149715	0.0209717
Nxf1	5092.83	-0.022058	0.039876	-0.553166	0.58015	0.795917
Abcf1	5116.26	0.0518965	0.0541722	0.957991	0.338067	0.611279
Hat1	5062.18	-0.155868	0.0959888	-1.62382	0.104414	0.313809
Tm9sf3	5042.69	0.0769089	0.0529665	1.45203	0.146494	0.385602
Xpot	5039.2	0.0414059	0.0656984	0.630243	0.528536	0.763894
Cab39	4964.22	0.0311256	0.0727023	0.428124	0.668561	0.847214
Hmgcr	5123.81	-0.0946125	0.0646827	-1.46272	0.143545	0.38069
Hsph1	5011.67	0.0180635	0.0693016	0.260651	0.794361	0.912563
Lrrc59	5081.79	0.0335283	0.0660018	0.50799	0.61146	0.814918
Pold1	5118.3	0.385446	0.0844723	4.56298	5.04326e-06	0.000497901
Nudc	5178.91	-0.115422	0.0660773	-1.74676	0.0806783	0.269819
Ppa1	5070.42	0.0415182	0.0660401	0.628681	0.529558	0.764604
Rnps1	5080.55	0.0489351	0.0612824	0.798518	0.42457	0.684156
St13	5015.51	-0.0311977	0.0661659	-0.471508	0.637278	0.830531
Cluh	5020.49	0.346086	0.0813231	4.25569	2.08403e-05	0.00137794
Mars	5041.21	0.152178	0.053175	2.86183	0.00421207	0.0408016
Sptan1	4981.98	0.182213	0.0810212	2.24896	0.0245152	0.132444
Cdc37	5112.01	0.0518365	0.0511397	1.01363	0.310761	0.582451
Ogt	4970.66	0.187464	0.083832	2.23619	0.0253394	0.13538
Sdf4	5122.83	-0.138725	0.112801	-1.22983	0.218763	0.48131
Cyp51	5113.02	-0.36573	0.0774448	-4.72247	2.33002e-06	0.000310972
Sh2d2a	5001.4	0.00787372	0.0946915	0.0831513	0.933731	0.975906
Atp13a3	4858.92	0.155112	0.0684611	2.2657	0.0234696	0.129168
Kif11	4893.96	-0.255419	0.11429	-2.23484	0.025428	0.135569
Spn	4948.08	0.0432818	0.12371	0.349865	0.72644	0.879317
Dnajc2	4982.61	-0.173303	0.058448	-2.96508	0.00302605	0.0332163
Ndfip1	4973.75	0.0475917	0.0582726	0.816708	0.414095	0.676885
Aco2	5000.09	0.134094	0.0496994	2.69809	0.00697382	0.057572
Gtpbp4	4954.02	-0.0692827	0.065552	-1.05691	0.290552	0.560419
Stag2	4832.75	-0.0979557	0.0951809	-1.02915	0.303408	0.575361
Atrx	4831.94	0.0735144	0.0597175	1.23104	0.21831	0.480855
Rdx	4933.66	0.0251354	0.067147	0.374334	0.708156	0.869286
Got2	4927.63	-0.004941	0.0604176	-0.0817808	0.934821	0.976203
Fam49b	4917.71	-0.129704	0.0885579	-1.46463	0.143023	0.379757
Atp5c1	4866.74	-0.0574981	0.0638331	-0.900757	0.367718	0.637098
Tcf25	4972.69	-0.0757363	0.0531777	-1.42421	0.154385	0.395568
Larp4	4820.49	0.0766281	0.0534463	1.43374	0.151647	0.392101
Acsl5	4918.5	-0.117278	0.0633781	-1.85044	0.0642498	0.236037
Uck2	4875.94	0.0277024	0.0561756	0.493139	0.621914	0.821492
Ak2	4985.01	-0.281268	0.0891613	-3.1546	0.0016072	0.0218755
Ddx1	4867.01	-0.0283481	0.0619893	-0.457306	0.647451	0.836008
Gcn1l1	4879.08	0.250707	0.066473	3.77156	0.000162229	0.00485638
Tuba4a	4842.97	-0.160443	0.0731881	-2.1922	0.0283653	0.144536
Snd1	4882.32	0.102186	0.0574681	1.77813	0.0753822	0.258793
Ifng	4148.95	1.8942	0.549094	3.44969	0.00056124	0.0111122
Rpn2	4884.94	0.0154391	0.054295	0.284356	0.776137	0.902415
Ezr	4878.03	0.107527	0.0526735	2.04139	0.0412124	0.18054
Dock2	4780.73	0.194652	0.0727299	2.67636	0.00744261	0.0600503
Ppp6r1	4845.87	-0.0170963	0.0853437	-0.200323	0.841228	0.936474
Prpf40a	4707.21	-0.0233867	0.0590833	-0.395827	0.692233	0.862837
Otud4	4763.7	0.0819857	0.0541665	1.51359	0.13013	0.357817
Ywhag	4853.19	0.257804	0.0827017	3.11727	0.00182531	0.0238501
Atp1b3	4751.18	0.104737	0.0489256	2.14074	0.0322948	0.155932
Mtdh	4773.71	-0.0342233	0.064969	-0.526763	0.598358	0.807473
Tomm20	4780.49	-0.113416	0.0656763	-1.7269	0.0841863	0.277046
Ctbp1	4788.52	0.315402	0.0862999	3.65473	0.000257458	0.00648823
Rhoa	4789.96	0.0640322	0.0533702	1.19978	0.230227	0.494558
Cycs	4778.63	-0.133593	0.121291	-1.10143	0.270711	0.539103
Eif5b	4797.02	-0.047828	0.0528405	-0.905138	0.365392	0.634984
Nop2	4768.07	0.0461331	0.0622927	0.740587	0.458944	0.71231
Jak1	4740.45	0.127153	0.0673248	1.88864	0.0589395	0.22475
Esyt1	4777.63	0.136501	0.0796401	1.71397	0.0865335	0.280985
Arcn1	4674.58	0.00090687	0.0628338	0.0144328	0.988485	0.995043
Dock10	4701.76	0.235417	0.0960253	2.45161	0.0142217	0.0925023
Txnrd1	4688.7	0.236048	0.0811398	2.90915	0.00362408	0.0373394
Calm2	4768.73	-0.182236	0.0982551	-1.85473	0.0636354	0.235069
Nlrc5	4731.31	-0.0133058	0.0633439	-0.210056	0.833624	0.933125
Cox4i1	4734.95	0.0108897	0.0751219	0.14496	0.884742	0.955726
Btg1	4711.7	0.152451	0.0741072	2.05718	0.0396694	0.176088
Slc38a2	4716.94	-0.0558326	0.0698945	-0.798812	0.4244	0.684156
Ogdh	4621.53	0.441377	0.0778373	5.67051	1.42373e-08	8.55066e-06
Ubr5	4573.63	0.180383	0.0726301	2.48358	0.0130068	0.0874443
Utp20	4552.31	0.261389	0.0921899	2.83533	0.0045778	0.0432401
Stt3a	4632.65	-0.0244314	0.0722035	-0.338369	0.735085	0.883696
Nr4a3	4523.93	0.811339	0.155686	5.21137	1.87451e-07	4.82484e-05
Eif4e	4622.44	-0.115255	0.0765404	-1.5058	0.132118	0.36166
Ccr7	4659.23	0.709758	0.105714	6.71394	1.89439e-11	6.82643e-08
Mapre1	4580.67	0.0692711	0.0554468	1.24933	0.211546	0.471997
Plagl2	4660.14	0.143042	0.106462	1.3436	0.179079	0.429705
Cyb5b	4706.8	-0.16905	0.0645835	-2.61754	0.00885653	0.0680118
Stat3	4662.1	0.100051	0.103069	0.970724	0.331686	0.604739
Ddx17	4675.58	0.164537	0.0926504	1.77589	0.0757514	0.259663
Gpx1	4620.71	0.0484493	0.062286	0.777853	0.436655	0.695002
Psmd8	4619.65	-0.0749977	0.0518659	-1.44599	0.148179	0.387492
Usp7	4617.22	-0.142765	0.0726105	-1.96618	0.0492779	0.201845
Syngr2	4715.51	0.220286	0.210746	1.04526	0.295901	0.567372
Psmd3	4655.69	0.056097	0.0576089	0.973755	0.330178	0.603575
Wipf1	4600.84	-0.157173	0.0934077	-1.68266	0.0924418	0.291271
Atp5d	4733.63	0.0329039	0.0483988	0.679849	0.4966	0.74272
Dync1h1	4536.54	0.366152	0.0880298	4.15941	3.19071e-05	0.00178223
Smarcc1	4566.45	0.141483	0.0669961	2.11182	0.0347022	0.162719
Pfkl	4735.33	-0.232163	0.0907155	-2.55924	0.0104901	0.0759438
Il4ra	4743.38	-0.789168	0.213789	-3.69135	0.00022307	0.00591355
Abcf2	4595.72	0.0356637	0.0473195	0.753679	0.451042	0.706386
Irgm1	4745.13	-0.126482	0.118487	-1.06748	0.285757	0.554562
Gimap3	4554.37	-0.238352	0.087564	-2.72203	0.00648826	0.0547922
Eif1a	4520.28	-0.224865	0.0861142	-2.61124	0.00902144	0.068831
Eif4ebp2	4546.57	0.0847171	0.0572072	1.48088	0.138638	0.37255
Cd28	4505.57	0.0497385	0.0803688	0.618878	0.535997	0.768513
Hmgb1	4631.6	-0.394935	0.0896865	-4.40351	1.06514e-05	0.00085294
Rac1	4535.39	0.0420349	0.0605732	0.693952	0.487712	0.735659
Lonp1	4642.96	-0.208441	0.0926511	-2.24974	0.0244654	0.132444
Tnfrsf4	4618.42	0.0176467	0.0934111	0.188915	0.85016	0.941098
Nfx1	4531.5	-0.169715	0.0709918	-2.39064	0.0168192	0.103181
Ebna1bp2	4557.48	-0.105965	0.0650841	-1.62813	0.103497	0.312421
Srpk1	4507.19	0.00715776	0.0543414	0.131718	0.895207	0.959764
Snrpd2	4682.19	0.0288113	0.0988401	0.291494	0.770674	0.89997
Nol7	4419.04	-0.175942	0.0916511	-1.9197	0.0548963	0.215539
Taf1d	4485.5	-0.543908	0.100111	-5.43304	5.5402e-08	2.21823e-05
Ago2	4420.35	0.222912	0.0884136	2.52124	0.0116944	0.0817075
Scaf11	4443.58	0.0100291	0.066439	0.150952	0.880014	0.953078
Psmc3	4526.42	-0.0759177	0.065347	-1.16176	0.245332	0.510351
Dot1l	4476.04	0.317495	0.0893834	3.55206	0.000382229	0.00839956
Ywhaq	4392.16	0.120789	0.0796196	1.51708	0.129248	0.356011
Cd69	4437.89	-0.163549	0.117087	-1.39682	0.162469	0.406427
Mthfd1l	4506.81	0.23144	0.0662662	3.49258	0.000478375	0.00999318
Ccna2	4371.99	-0.137765	0.0814827	-1.69073	0.090888	0.288179
Fth1	4465.92	0.281414	0.089031	3.16086	0.00157305	0.0216152
Trac	4347.11	-0.205408	0.106923	-1.92108	0.054722	0.215173
Stat5a	4414.12	0.208567	0.125746	1.65864	0.0971892	0.300305
Hprt	4441.12	-0.134492	0.0650479	-2.06759	0.0386784	0.173409
Irf1	4577.22	-0.0681052	0.0787089	-0.865279	0.386886	0.653837
Trap1	4427.22	0.058515	0.0420182	1.39261	0.163738	0.407865
Ddx27	4433.14	-0.0106651	0.0640803	-0.166434	0.867815	0.948059
Nsd2	4387.4	0.101629	0.0619221	1.64124	0.100749	0.307298
Ddx18	4441.24	0.0260446	0.054717	0.475988	0.634083	0.828828
Iigp1	4457.94	-0.000400108	0.0915947	-0.00436825	0.996515	0.998123
Cd164	4371.43	0.350167	0.0860271	4.07042	4.69285e-05	0.00220572
Stk4	4369.09	-0.0164036	0.0934119	-0.175605	0.860605	0.94462
Ppp1cb	4318.4	-0.00467131	0.0538446	-0.0867555	0.930866	0.975109
Cdca7	4407.76	0.27686	0.0917416	3.01782	0.00254599	0.0295713
Npc2	4567.28	-0.0927529	0.0815574	-1.13727	0.255424	0.522205
Smchd1	4349.83	0.0914803	0.0591966	1.54536	0.122258	0.345025
Smarca4	4392.69	0.218784	0.0648376	3.37434	0.000739929	0.0130863
Rtcb	4455.17	-0.00775945	0.0539706	-0.143772	0.885681	0.955741
Rpl7l1	4407.19	0.0724361	0.0704127	1.02874	0.303604	0.575585
Ganab	4389.72	-0.0285302	0.0717122	-0.397843	0.690746	0.862027
BC005537	4418.14	0.176153	0.0563448	3.12635	0.00176992	0.0233622
Gimap4	4408.31	-0.188261	0.104742	-1.79738	0.0722756	0.25366
Ywhab	4357.48	0.0613947	0.0545152	1.12619	0.260084	0.527858
Zap70	4357.63	0.109325	0.0891913	1.22574	0.220296	0.483457
Mdh1	4354.14	-0.143725	0.117688	-1.22124	0.221996	0.485635
Spcs3	4278.49	0.0483035	0.054329	0.889091	0.373954	0.642552
Ccnl2	4344.28	-0.0119172	0.0665723	-0.179011	0.857929	0.94402
Ssr3	4297.19	-0.227568	0.0830086	-2.7415	0.00611589	0.0528187
Rpl14-ps1	4416.24	-0.0135725	0.117633	-0.11538	0.908144	0.965196
Cnn2	4410.57	-0.0670883	0.0649334	-1.03319	0.301517	0.573208
Ppp2r1a	4375.21	0.0864969	0.0601375	1.43832	0.150344	0.390742
Hivep3	4284.05	0.198975	0.154301	1.28953	0.197215	0.454608
Jak3	4395.48	-0.0103278	0.0863879	-0.119552	0.904838	0.96413
Immt	4344.37	-0.0172303	0.0691069	-0.249329	0.803107	0.917491
Smg1	4237.31	0.251208	0.0880074	2.8544	0.00431182	0.041489
Calm3	4378.02	0.0502194	0.059024	0.85083	0.394864	0.660668
Stt3b	4332.96	-0.0170137	0.0506849	-0.335676	0.737115	0.884183
Uqcrc1	4306.63	0.140676	0.0568089	2.4763	0.0132754	0.0888353
Bzw2	4302.4	0.0964031	0.0681401	1.41478	0.157134	0.398809
Mllt6	4394.03	0.121432	0.109523	1.10874	0.267544	0.53613
Gm8995	4211.27	0.403934	0.137981	2.92747	0.00341733	0.0358842
Ddx46	4280.1	-0.0496506	0.061825	-0.803084	0.421926	0.683042
Top1	4196.25	0.0806131	0.0702486	1.14754	0.251158	0.516876
Bag6	4334.18	0.223245	0.0627766	3.55619	0.000376277	0.00833127
Nup85	4254.96	-0.0305361	0.0512117	-0.596273	0.550993	0.777562
Cd200	4094.54	0.359026	0.128081	2.80312	0.00506107	0.0464061
Tra2a	4208.31	-0.109462	0.0773902	-1.41441	0.157241	0.398886
Banf1	4288.06	0.244394	0.0729807	3.34875	0.000811768	0.0140298
Cd82	4331.82	0.0372425	0.108967	0.341779	0.732517	0.882465
Xrn2	4247.88	-0.00645834	0.0660913	-0.0977184	0.922156	0.971071
Adsl	4199.36	0.043389	0.0666391	0.651104	0.514979	0.755078
Nisch	4247.07	-0.29266	0.0865939	-3.37968	0.000725697	0.0129618
Slc3a2	4321.12	0.0956699	0.0765766	1.24934	0.211542	0.471997
Celf2	4106.52	0.171998	0.0949544	1.81138	0.0700824	0.249363
Ruvbl2	4256.83	0.0202912	0.0529438	0.383259	0.701528	0.866182
Atl3	4192.99	0.243593	0.0605503	4.02299	5.74645e-05	0.0025024
Pak2	4162.96	0.181446	0.0560528	3.23705	0.00120772	0.018172
Psmd1	4130.5	0.0551359	0.0693383	0.795172	0.426514	0.685599
Fermt3	4261.51	-0.0599563	0.0772349	-0.776285	0.437581	0.695708
Ctnnb1	4208.73	0.0692396	0.0661207	1.04717	0.295021	0.566237
Psmc6	4196.82	-0.316874	0.104141	-3.04274	0.00234434	0.0280394
Pdcd11	4216.59	0.0162635	0.0769809	0.211267	0.832679	0.932693
Hint1	4305.58	0.0689846	0.0826761	0.834396	0.404058	0.66819
Top2b	4102.31	-0.0912912	0.117836	-0.774729	0.4385	0.696555
Ncor1	4135.97	0.139919	0.0861787	1.6236	0.104462	0.313888
Rnf19b	4397.02	-0.403684	0.322379	-1.2522	0.210496	0.471116
Oxct1	4095.08	0.0572951	0.0971825	0.589562	0.555484	0.780081
Nsa2	4232.22	-0.0937583	0.102773	-0.912287	0.361618	0.632228
Sympk	4210.35	0.0874168	0.0715233	1.22222	0.221626	0.485203
Emg1	4209.48	-0.197195	0.0709955	-2.77757	0.00547675	0.0486995
Psmb3	4250.4	-0.09074	0.107445	-0.844526	0.398376	0.663816
Chtop	4186.69	-0.0140979	0.0538642	-0.261731	0.793529	0.912043
Arf6	4231.51	0.103139	0.0959645	1.07476	0.28248	0.551194
Cpsf6	4101.14	0.0191162	0.0416498	0.458974	0.646253	0.835297
Rtn3	4122.36	-0.130607	0.0744639	-1.75397	0.0794357	0.267145
Atp5g2	4227.18	0.0326486	0.0811188	0.402479	0.687332	0.859913
Ncbp1	4095.4	-0.0217546	0.058898	-0.36936	0.711859	0.87152
Tuba1c	4136.36	-0.194544	0.0999844	-1.94574	0.0516859	0.208275
Gm6793	4318.96	-0.109878	0.0763794	-1.43858	0.15027	0.390666
Ranbp1	4090.88	-0.129237	0.0774671	-1.66828	0.0952607	0.296052
Pes1	4195.18	0.0119543	0.0633017	0.188846	0.850213	0.941098
Pnn	4164.53	0.041	0.0609532	0.672647	0.501172	0.745653
Cotl1	4122.84	0.0795023	0.0782625	1.01584	0.309705	0.581388
Mycbp2	4077.35	0.325432	0.0721143	4.51272	6.40016e-06	0.000587592
Cbfb	4006.3	0.114382	0.065628	1.74289	0.0813534	0.271566
Ppp1r14b	4250.04	0.17646	0.0759788	2.32249	0.0202064	0.117111
Dazap2	4149.56	-0.108959	0.0661966	-1.64599	0.0997666	0.305186
Sla	4018.03	-0.215105	0.138069	-1.55795	0.119245	0.34046
Sept9	4076.96	0.1418	0.120997	1.17193	0.241225	0.506633
Ankrd17	4059.7	0.134612	0.0840172	1.60219	0.109113	0.323511
Rapgef1	4117.43	0.105086	0.0656916	1.59969	0.109668	0.324391
Ncaph2	4076.34	-0.095486	0.0501246	-1.90497	0.0567838	0.220247
Glud1	4039.95	0.382686	0.0581487	6.58117	4.66756e-11	1.34556e-07
Psma3	4047.7	-0.187974	0.114036	-1.64837	0.0992767	0.304333
U2surp	4001.36	-0.135495	0.0710651	-1.90662	0.0565692	0.2199
Tnfrsf9	3984.34	0.498098	0.122859	4.05424	5.02978e-05	0.00230157
H3f3a	4128.64	0.0384351	0.0872427	0.440554	0.659536	0.841884
Exoc2	4027.49	-0.306096	0.131732	-2.32362	0.0201458	0.116948
Nap1l4	4025.25	0.061864	0.0467216	1.3241	0.18547	0.44006
Amd1	3988.71	0.0911321	0.0690185	1.3204	0.186701	0.44136
Nup62	4118.95	0.0235489	0.0594183	0.396324	0.691866	0.862498
Ahsa1	4134.38	-0.0983927	0.0614583	-1.60097	0.109385	0.323951
Gabpb2	4002.9	0.0287482	0.0824523	0.348664	0.727341	0.880039
Erap1	3973.85	-0.0415052	0.0562773	-0.737513	0.460811	0.713593
Ppp5c	4052	0.0957897	0.0607316	1.57726	0.114735	0.333538
Xpo6	3976.54	0.180951	0.062177	2.91025	0.00361139	0.0373394
Hyou1	4023.67	-0.109348	0.0826183	-1.32353	0.18566	0.440293
Rfwd3	3982.98	0.00853843	0.0594561	0.143609	0.885809	0.955741
Pml	4202.88	-0.0796475	0.151164	-0.526895	0.598267	0.807473
Srp72	3953.77	-0.00764593	0.0668938	-0.114299	0.909	0.965532
Psmc1	4110.41	-0.0360845	0.0723906	-0.498469	0.618153	0.819241
Ftl1	4067.58	0.0882579	0.0665279	1.32663	0.184631	0.43843
Mdm4	3940.49	0.0710887	0.0669145	1.06238	0.288063	0.557267
Arl6ip1	3958.55	-0.196316	0.0891693	-2.20161	0.0276928	0.142745
Ep400	4007.21	0.229473	0.0694378	3.30473	0.000950684	0.0155365
Ppat	3943.23	0.0681297	0.0696657	0.977952	0.328098	0.601068
Cd44	3861.17	0.588449	0.137356	4.28413	1.83458e-05	0.00124734
Dazap1	4062.91	-0.00403684	0.0535459	-0.0753902	0.939904	0.977638
Umps	3981.6	0.121329	0.0592162	2.04891	0.040471	0.178344
Cd47	4037.27	0.0424186	0.0905751	0.468325	0.639552	0.83162
Akt1	4013.51	0.261457	0.0622735	4.19852	2.6866e-05	0.00158654
Lyar	4031.46	-0.00651155	0.0774441	-0.0840806	0.932992	0.975694
Psmd7	3970.69	0.0164627	0.0645523	0.255029	0.798701	0.915348
Psip1	3967.35	0.00567765	0.0675134	0.0840966	0.93298	0.975694
Psmb1	3974.15	-0.167252	0.0692677	-2.41457	0.0157538	0.0988146
Lbr	3983.55	-0.0583012	0.0656446	-0.888134	0.374469	0.642647
Fnbp1	3993.12	0.0995266	0.0796129	1.25013	0.211251	0.471997
Sod1	4077.96	-0.0140658	0.0600886	-0.234083	0.81492	0.923085
Myo1g	3994.76	0.352935	0.205522	1.71727	0.0859306	0.280279
Glrx3	3933.36	0.0565492	0.144781	0.390585	0.696104	0.864295
Mrfap1	3996.79	0.143245	0.0686	2.08812	0.0367869	0.168012
Apobec3	3972.97	-0.129154	0.124562	-1.03687	0.299797	0.571294
Selenof	3860.28	0.0337914	0.155993	0.216621	0.828504	0.930724
Itgb2	3873.1	0.281897	0.0635717	4.43432	9.23642e-06	0.000760764
Isyna1	3951.09	0.196556	0.0580542	3.38574	0.000709865	0.0127422
Dgkz	3932.85	0.191985	0.0806763	2.3797	0.0173269	0.105336
Slc25a4	3994.69	-0.0252063	0.0709381	-0.355329	0.722343	0.876753
Sec61a1	3939.15	0.0474458	0.0642659	0.738272	0.460349	0.713108
Uqcrc2	3904.44	-0.00505221	0.0685278	-0.073725	0.941229	0.978155
Cyc1	4000.1	0.106553	0.0663629	1.60561	0.10836	0.322108
Hdac1	3896.83	0.0328404	0.0513185	0.639933	0.522216	0.760103
Eif3d	3943.05	0.0322645	0.0602852	0.535197	0.592513	0.804038
Eif3k	3992.11	-0.104766	0.0583672	-1.79495	0.0726617	0.254272
Prkca	3826.62	0.227273	0.0941605	2.41368	0.0157923	0.0989373
Rbck1	3945.24	-0.109145	0.058255	-1.87357	0.06099	0.229893
Tapbp	4042.79	0.117985	0.0935298	1.26147	0.207141	0.467983
Gnai3	3837.98	0.123048	0.0594147	2.07101	0.0383577	0.172519
Pim1	4003.07	0.30558	0.198484	1.53957	0.123666	0.347401
Foxp1	3848.1	0.102305	0.105398	0.97065	0.331723	0.604739
Purb	3867.7	0.0813781	0.0706014	1.15264	0.249058	0.514801
Ube2s	3908.88	-0.125038	0.103167	-1.212	0.225513	0.489319
Rpl17-ps10	3972.08	0.00995089	0.349172	0.0284985	0.977265	0.991085
Gna13	3918.42	0.069512	0.0685807	1.01358	0.310783	0.582451
Gm10123	3919.98	-0.290093	0.239147	-1.21303	0.225118	0.488755
Tmed2	3913.19	-0.0608397	0.0564429	-1.0779	0.281079	0.5498
Cops2	3792.31	-0.291954	0.100817	-2.89587	0.00378103	0.0382455
Arid1a	3873.72	0.165726	0.0722946	2.29237	0.0218844	0.123246
Edem1	3842.15	0.38383	0.0707749	5.42324	5.85272e-08	2.28003e-05
Yme1l1	3822.59	-0.174709	0.0740937	-2.35795	0.0183763	0.109712
Ubap2	3856.61	0.0914462	0.0736077	1.24235	0.214109	0.4752
Supt6	3875.13	0.104628	0.0843844	1.23989	0.215015	0.476584
Tes	3841.09	-0.0360784	0.0953747	-0.37828	0.705222	0.867846
Stat6	3870.64	0.19981	0.0480345	4.15972	3.18633e-05	0.00178223
Eif4a3	3860.1	0.0622091	0.0572494	1.08663	0.277199	0.546138
Fam107b	3798.14	0.0999338	0.0686322	1.45608	0.145371	0.383629
Tagap	3868.09	-0.358765	0.0968292	-3.70513	0.000211281	0.00577876
Pole	3846.72	0.141486	0.0720065	1.9649	0.0494257	0.20222
Nop53	3930.06	0.0540131	0.054402	0.992852	0.320782	0.593931
Calu	3855.98	0.00642991	0.0593713	0.1083	0.913758	0.967701
Pum3	3827.41	-0.0567765	0.0705201	-0.805112	0.420755	0.682508
Ssr1	3843.37	-0.0590437	0.0596097	-0.990506	0.321927	0.594774
Pomp	3864.44	-0.0985476	0.100543	-0.980151	0.327012	0.599841
Cand1	3796.23	0.121478	0.0657411	1.84783	0.064627	0.236893
Rars	3861.63	-0.123874	0.0582964	-2.12489	0.0335956	0.159397
B4galnt1	3774.23	0.442498	0.107992	4.09751	4.17619e-05	0.00202679
Ap2m1	3778.63	0.111093	0.0559292	1.98632	0.0469981	0.196414
Ilf3	3839.19	-0.0335751	0.0614516	-0.546366	0.584814	0.799205
E2f4	3800.77	0.00710088	0.0496117	0.143129	0.886188	0.955741
Slbp	3823.72	-0.0872857	0.0487149	-1.79177	0.0731702	0.254997
Hmga1	3937.24	-0.16819	0.0705956	-2.38244	0.0171983	0.104803
Uqcrfs1	3893.65	-0.107977	0.0538483	-2.00521	0.0449405	0.191648
Rfc1	3791.1	-0.0733112	0.0625104	-1.17278	0.240882	0.506256
Rcc1	3818.63	0.0842776	0.0726711	1.15971	0.246166	0.511032
Fkbp8	3838.11	-0.00107388	0.0715849	-0.0150015	0.988031	0.994795
Eif6	3866.06	-0.113186	0.0829053	-1.36525	0.172175	0.420187
Phf6	3701.66	0.17691	0.0952855	1.85663	0.0633636	0.234742
Ahctf1	3695.18	0.144519	0.0616458	2.34434	0.0190607	0.112263
Il12rb1	3844.21	0.218633	0.0662213	3.30156	0.000961505	0.0156391
Snrpd1	3774.48	-0.197788	0.107708	-1.83633	0.0663093	0.240751
Ddx24	3842.17	-0.0923059	0.101288	-0.911317	0.362128	0.632387
Jpt1	3781.66	-0.0722838	0.0738914	-0.978244	0.327954	0.601039
Ccnd3	3830.93	0.0711864	0.072849	0.977178	0.328481	0.601683
Ptp4a3	3731.91	0.216277	0.117044	1.84783	0.0646269	0.236893
Hectd1	3700.26	0.150846	0.0801784	1.88139	0.0599195	0.227164
Rps3a2	3818.97	0.916738	0.994274	0.922017	0.35652	0.627957
Prpf38b	3789.56	-0.231544	0.0622196	-3.72141	0.000198117	0.00554498
Il2rg	3707.2	0.188548	0.0727651	2.59118	0.00956467	0.0715308
Prmt5	3702.33	0.00407687	0.06913	0.0589739	0.952973	0.981351
Kpna3	3713.79	-0.010949	0.0603669	-0.181375	0.856074	0.943405
Prpf4b	3698.58	0.0179113	0.0495906	0.361184	0.717962	0.874563
Skp1a	3718.09	-0.0941347	0.0518809	-1.81444	0.0696106	0.248358
Tcf7	3673.73	0.171956	0.0843068	2.03965	0.0413852	0.18093
Agpat3	3778	-0.192341	0.0783909	-2.45362	0.0141427	0.0921577
Dlst	3723.3	0.0676167	0.0579356	1.1671	0.24317	0.508433
Kpna4	3654.6	0.0777953	0.051679	1.50535	0.132233	0.361809
Txn2	3708.19	0.0159884	0.075708	0.211185	0.832743	0.932693
Tomm40	3766.83	-0.0257599	0.0649185	-0.396804	0.691512	0.86246
Grk6	3750.97	-0.0802451	0.0640844	-1.25218	0.210505	0.471116
Prdx3	3734.33	-0.132343	0.0815246	-1.62336	0.104513	0.31391
Tmem123	3802.61	0.0913265	0.309784	0.294807	0.768142	0.899066
Zc3hav1	3746.54	-0.0531368	0.0817114	-0.650299	0.515499	0.75525
Bcl2l1	3724.01	0.649987	0.116913	5.55958	2.70428e-08	1.2574e-05
Txlna	3680.31	0.132529	0.0559676	2.36795	0.017887	0.107826
Ppan	3721.76	-0.00557858	0.074602	-0.0747778	0.940391	0.977638
Prrc2b	3678.31	0.272575	0.0838643	3.25019	0.00115328	0.0176845
Gbp5	3772.81	-0.15288	0.0819971	-1.86446	0.0622571	0.232665
Gm15427	3643.15	-0.251672	0.138528	-1.81676	0.0692535	0.24739
Psmb8	3806.66	-0.124224	0.0954213	-1.30184	0.19297	0.44913
Eif1ax	3714.81	-0.0537502	0.076056	-0.706719	0.479741	0.730096
Lman2	3694.66	-0.11403	0.0645248	-1.76723	0.0771892	0.262654
Ecpas	3658.12	0.0718264	0.0627085	1.1454	0.252043	0.517971
Bop1	3682.52	0.0981776	0.0590577	1.6624	0.0964323	0.298796
Malt1	3604.74	-0.19376	0.115158	-1.68255	0.0924616	0.291271
Rapgef6	3606.61	-0.0881171	0.0972286	-0.906288	0.364784	0.634662
Cd3e	3598.98	0.0953764	0.115403	0.826461	0.408543	0.67223
Ptpn7	3620.85	-0.0400274	0.102117	-0.391974	0.695077	0.864047
Rif1	3556.75	0.150367	0.0862797	1.74278	0.0813719	0.271566
Ptpn1	3744.64	-0.118525	0.123273	-0.961483	0.33631	0.609339
Numa1	3682.15	0.141302	0.0846318	1.6696	0.0949977	0.29568
Arf3	3688.7	0.103574	0.067075	1.54415	0.122551	0.345685
Baz1a	3608.19	0.0360405	0.0837651	0.430257	0.667009	0.846872
Polr1a	3661.47	0.0782051	0.0758073	1.03163	0.302246	0.574291
Puf60	3674.47	0.229104	0.0513029	4.46571	7.98032e-06	0.000697142
Dcaf7	3623.26	0.109945	0.0701568	1.56713	0.117085	0.337329
Skiv2l2	3592.29	-0.110785	0.0644101	-1.71999	0.0854344	0.279259
Aldh18a1	3673.93	-0.0458888	0.0844221	-0.543563	0.586742	0.800364
Gmps	3602.19	-0.0415733	0.0646016	-0.643533	0.519878	0.758716
Utp4	3575.53	0.108431	0.075858	1.4294	0.152891	0.3936
Vasp	3749.63	0.268369	0.0852665	3.14741	0.00164725	0.0222526
Ncoa3	3645.11	-0.216665	0.119	-1.82072	0.068649	0.246048
Luc7l3	3607.28	-0.0330201	0.0821284	-0.402054	0.687644	0.859982
Smc3	3632.05	-0.0700727	0.0618827	-1.13235	0.257489	0.524364
Far1	3535.4	0.0824141	0.0942872	0.874075	0.382077	0.649518
Alkbh5	3688.35	-0.101248	0.0949406	-1.06643	0.286227	0.555123
Serp1	3611.59	-0.12003	0.0907397	-1.32279	0.185905	0.440511
Lars2	3810.31	0.142027	0.292693	0.485243	0.627504	0.824662
Clptm1l	3588.16	0.0150695	0.0497777	0.302735	0.762092	0.896396
Nadk	3601.82	0.185685	0.0541926	3.42639	0.000611665	0.0116262
Rpsa-ps10	3679.37	0.0282268	0.10293	0.274232	0.783906	0.907131
Ccar1	3536.01	-0.162749	0.0894148	-1.82015	0.0687356	0.246273
Csnk2a1	3622.07	0.0194771	0.0848944	0.229428	0.818537	0.924856
Copb2	3597.87	-0.00518211	0.0582185	-0.0890114	0.929073	0.974435
Sept1	3592.21	-0.00693193	0.0570263	-0.121557	0.90325	0.963482
Rnf4	3543.94	-0.0949719	0.0759776	-1.25	0.2113	0.471997
Akt2	3656.32	-0.0911895	0.0598863	-1.52271	0.127831	0.353944
Alyref	3637.27	-0.0844942	0.0647968	-1.30399	0.192238	0.448278
Xpo5	3555.66	0.0182698	0.0774776	0.235807	0.813582	0.922223
Wdr26	3555.87	-0.0493554	0.0693638	-0.711544	0.476747	0.727409
Casp3	3513.46	0.0745817	0.0809155	0.921723	0.356673	0.627957
Akap8	3607.1	-0.0553084	0.0574633	-0.962499	0.335799	0.608831
Fyn	3555.53	0.15712	0.091527	1.71665	0.0860426	0.280432
Polr2m	3568.56	0.116837	0.0541448	2.15787	0.0309383	0.152044
Bms1	3602.58	0.0496071	0.0923921	0.536919	0.591323	0.80333
Psme2	3622.78	0.0864958	0.136297	0.63461	0.525683	0.762623
Vps35	3536.26	-0.135053	0.0842848	-1.60234	0.109081	0.323511
Srpr	3579.89	-0.0338071	0.0694732	-0.48662	0.626527	0.824357
Clint1	3575.41	-0.0766396	0.0720141	-1.06423	0.287224	0.556309
Uqcrq	3656.84	0.0625813	0.108792	0.575239	0.56513	0.786728
Cnot6	3497.3	-0.0332505	0.0545205	-0.609871	0.541947	0.772587
Dbnl	3562.53	0.122839	0.0629247	1.95216	0.0509196	0.205963
Snhg1	3597.8	-0.335525	0.0982852	-3.41379	0.000640649	0.0118766
Stard7	3598.36	0.0726058	0.0458089	1.58497	0.112973	0.330705
Pprc1	3547.1	0.330458	0.066972	4.93427	8.04496e-07	0.000135148
Chmp4b	3658.07	-0.182532	0.102817	-1.77531	0.0758464	0.259803
Rasal3	3573.74	-0.151272	0.069081	-2.18978	0.0285404	0.145035
Setd5	3533.01	-0.0953071	0.0999669	-0.953386	0.340394	0.613453
Ankrd11	3588.56	-0.121879	0.0967003	-1.26037	0.207535	0.468716
Nckap1l	3539.42	0.0339023	0.0654998	0.517593	0.604742	0.811428
Trrap	3511.61	0.261947	0.0881529	2.9715	0.00296346	0.032858
Lrpprc	3479.58	0.0984944	0.0670723	1.46848	0.141973	0.377868
Tnks2	3473.93	-0.0399397	0.0533824	-0.748182	0.454351	0.709154
Nup107	3515.3	-0.0379377	0.0638972	-0.59373	0.552693	0.778664
Sept6	3537	0.327567	0.0856393	3.82497	0.00013079	0.00427485
Sbno1	3476.73	0.0421838	0.0742658	0.568011	0.570027	0.789808
Txnl1	3547.5	-0.0697463	0.0656903	-1.06174	0.288352	0.557519
Mtpn	3486.8	0.163089	0.056345	2.89446	0.00379807	0.0383371
Nup155	3489.46	0.0432586	0.0750785	0.576178	0.564495	0.786299
Fam168b	3540.55	0.165978	0.053974	3.07516	0.00210393	0.0262563
Sec24c	3549.54	-0.0252691	0.0578637	-0.436701	0.662328	0.843954
Azin1	3451.72	-0.122335	0.0877977	-1.39338	0.163506	0.407626
Gm16286	3491.18	0.0745081	0.0582672	1.27873	0.200992	0.459877
Clic1	3567.78	-0.0444653	0.076532	-0.581003	0.561238	0.783808
Ddost	3517.09	0.113526	0.0467906	2.42626	0.0152553	0.0968765
Rab10	3503.94	0.0520023	0.0535944	0.970293	0.331901	0.604806
Shmt1	3493.87	-0.0695639	0.0675019	-1.03055	0.302753	0.574725
Cox8a	3574.04	-0.248698	0.0990413	-2.51105	0.0120373	0.0832161
Rap1a	3452.24	-0.111	0.079741	-1.39201	0.16392	0.408214
Nup160	3415.1	0.0596389	0.0649863	0.917716	0.358767	0.629952
Prpf31	3563.55	-0.212539	0.0838511	-2.53472	0.0112538	0.0794391
Wdr36	3472.12	0.0882771	0.0534154	1.65265	0.0984019	0.302542
Pafah1b1	3483.81	0.0344066	0.0469851	0.732286	0.463994	0.716675
Ctcf	3456.2	0.0221354	0.0703202	0.31478	0.752929	0.891755
Nsd1	3440.15	0.0700842	0.0728528	0.961997	0.336051	0.609076
Tbrg4	3471.6	0.0594452	0.0667544	0.890506	0.373194	0.641899
Psmc4	3493.42	-0.0565014	0.0609371	-0.927208	0.353818	0.625304
Ppp2r5a	3522.06	-0.106472	0.0520455	-2.04575	0.0407808	0.179157
Pitrm1	3448.71	0.204335	0.0805404	2.53705	0.0111791	0.079027
Cytip	3474.39	0.101579	0.136716	0.742992	0.457487	0.71114
Psd4	3471.9	0.052686	0.0559414	0.941806	0.346292	0.618443
Ppp1r15b	3491.71	0.0438189	0.0562166	0.779464	0.435706	0.694183
Ncapg2	3415.03	-0.0940319	0.063418	-1.48273	0.138145	0.372144
Capza2	3431.46	0.0207882	0.0673712	0.308562	0.757654	0.893466
Cox6a1	3525.22	-0.0234442	0.0698634	-0.335572	0.737194	0.884183
Sfxn1	3422.5	0.0305918	0.04707	0.649921	0.515743	0.75525
Eif4g3	3434.92	0.120477	0.0525915	2.29081	0.0219742	0.123436
Nacc1	3488.81	0.0557281	0.0658707	0.846022	0.39754	0.663004
Nup188	3433.12	0.17831	0.0750215	2.37678	0.0174643	0.105902
Eif3g	3512.97	-0.0259721	0.0711929	-0.364813	0.715251	0.873379
Yars	3495.57	-0.113078	0.0674633	-1.67614	0.0937102	0.293195
Atp11b	3462.15	0.00852599	0.0885009	0.0963379	0.923252	0.97155
Ckap5	3362.69	-0.115549	0.117823	-0.980701	0.32674	0.599647
Hdac2	3440.08	-0.0269156	0.0729781	-0.368818	0.712264	0.871599
Rbbp6	3443.76	-0.0602074	0.0680473	-0.884787	0.376272	0.644131
Cbx3	3452.16	-0.30948	0.0832356	-3.71812	0.000200711	0.00559584
Psma6	3460.44	-0.0739575	0.0632074	-1.17008	0.24197	0.507078
Usp24	3349.95	0.241036	0.073982	3.25803	0.00112187	0.0173134
Aqr	3391.79	0.11715	0.0951178	1.23163	0.218088	0.480695
Snrpe	3369.27	-0.303034	0.140601	-2.15528	0.0311401	0.152723
Pdap1	3564.3	-0.129991	0.0872097	-1.49056	0.136077	0.368827
Chtf8	3506.43	0.0537863	0.0832772	0.64587	0.518363	0.757547
Exosc10	3410.93	0.251617	0.0745653	3.37445	0.000739644	0.0130863
Ppp2r5c	3363.09	-0.172274	0.0721385	-2.3881	0.0169356	0.103656
Bub3	3400.58	-0.0631323	0.0577403	-1.09339	0.274225	0.543248
Cdk6	3386.89	-0.0297021	0.102481	-0.28983	0.771946	0.90052
Noc4l	3405.08	0.122858	0.0672864	1.8259	0.0678656	0.244482
Nup98	3400.43	0.00889354	0.0814699	0.109164	0.913073	0.967509
Tnfsf8	3329.9	-0.408057	0.224557	-1.81717	0.0691914	0.24723
Tipin	3384.07	-0.143931	0.0749967	-1.91916	0.0549639	0.215578
Rabggtb	3404.22	-0.433034	0.0771714	-5.61133	2.00776e-08	1.09871e-05
Mapkapk2	3490.32	0.121076	0.11093	1.09146	0.275069	0.54407
Etnk1	3454.42	0.0728397	0.107009	0.680689	0.496068	0.742394
Nomo1	3377.72	0.267234	0.0666135	4.01172	6.0279e-05	0.00255548
Notch1	3349.46	0.385849	0.130785	2.95025	0.00317513	0.0341285
Pgd	3478.25	-0.226503	0.0914565	-2.47662	0.0132633	0.0887958
Stat5b	3398.87	-0.0692929	0.118958	-0.582499	0.560231	0.78316
Lsm14a	3386.23	0.0378829	0.0465617	0.813607	0.41587	0.678635
Wdr82	3397.89	-0.053975	0.0546482	-0.987681	0.323309	0.596104
Nfatc1	3340.25	0.271949	0.101604	2.67655	0.00743838	0.0600503
Psmc5	3407.38	-0.0137039	0.0755854	-0.181303	0.856129	0.943405
Selenot	3263.61	-0.248724	0.0726206	-3.42498	0.000614844	0.0116491
Rbm28	3382.62	-0.0329264	0.0577444	-0.57021	0.568535	0.788994
H13	3397.9	-0.00807019	0.0560698	-0.143931	0.885555	0.955741
Dnmt3a	3298.8	0.229978	0.123506	1.86208	0.0625923	0.233249
Arpc3	3439.66	-0.110863	0.0621378	-1.78414	0.0744003	0.25748
Kcnab2	3405.81	0.216222	0.112397	1.92373	0.0543882	0.214488
Sf3a1	3379.51	0.077562	0.056599	1.37038	0.170569	0.418056
Farsb	3401.91	-0.199643	0.0611264	-3.26607	0.00109053	0.0170118
Zc3h15	3377.27	-0.10876	0.0525493	-2.06967	0.0384835	0.172858
Ifrd2	3373.89	0.291854	0.0639916	4.56082	5.09544e-06	0.000499631
Pebp1	3483.61	0.164397	0.109825	1.4969	0.13442	0.365846
Gm4204	3374.89	0.0736316	0.0514089	1.43227	0.152065	0.392527
Wapl	3329.91	-0.045171	0.0626415	-0.721102	0.470847	0.722613
Rab7	3353.35	0.000983067	0.0608175	0.0161642	0.987103	0.994138
Serpinb6b	3197.11	0.296811	0.234805	1.26407	0.206204	0.467258
Nefh	3358.09	0.243128	0.0872308	2.78718	0.00531683	0.0477786
Ptpn11	3337.78	0.0565687	0.0799643	0.707425	0.479303	0.72957
Gnb2	3412.6	0.203075	0.0650615	3.12127	0.00180072	0.0236395
Rnf213	3602.08	-0.310706	0.350883	-0.885498	0.375888	0.643805
Rps27l	3289.49	-0.178365	0.161212	-1.10641	0.268551	0.536803
Trp53	3343.71	-0.0219023	0.057152	-0.383229	0.70155	0.866182
Ubqln1	3315.65	0.156764	0.0604464	2.59344	0.00950209	0.0712607
Npm3	3330.7	0.0235267	0.0908012	0.259101	0.795557	0.9135
Il21r	3349.65	0.0937156	0.122757	0.763427	0.445209	0.702567
Brd4	3316.27	0.268578	0.0712194	3.77114	0.000162504	0.00485638
Tcerg1	3290.98	-0.0428073	0.0563599	-0.759535	0.447533	0.703921
Bcat1	3278.22	0.0226692	0.0866614	0.261584	0.793642	0.9121
Pitpna	3315.52	0.0261048	0.0676752	0.385736	0.699692	0.865573
Ndufa4	3349.93	-0.193205	0.149105	-1.29576	0.195057	0.452019
2900097C17Rik	3350.18	-0.0678946	0.0708328	-0.958519	0.337801	0.611107
Rnf10	3344.31	-0.0222257	0.0609465	-0.364675	0.715354	0.873379
Sae1	3293.53	0.0456864	0.0613996	0.744084	0.456826	0.710782
Arhgap30	3385.5	-0.135367	0.0802462	-1.6869	0.0916233	0.28992
Psmb9	3374.57	-0.0239169	0.0696194	-0.343537	0.731194	0.881332
Psmd6	3315.08	-0.142637	0.078224	-1.82344	0.068237	0.245279
Kif5b	3200.89	0.0799867	0.0640086	1.24962	0.211437	0.471997
Nrd1	3276.97	-0.0315871	0.059119	-0.534296	0.593137	0.804454
Htt	3277.89	0.110195	0.0718686	1.53328	0.125206	0.349617
Lnpep	3235.82	0.396696	0.100886	3.93212	8.41987e-05	0.00317707
Upf1	3303.43	0.170412	0.0803179	2.12172	0.0338612	0.160036
Ppp4c	3330.57	-0.0378324	0.0626761	-0.603617	0.546098	0.774465
Dennd2d	3275.06	-0.237595	0.0832811	-2.85292	0.00433193	0.0416293
Akr1a1	3324.23	0.088177	0.0526606	1.67444	0.0940445	0.293792
Cdk1	3294.76	-0.177447	0.0872464	-2.03386	0.0419657	0.182193
Hk2	3379.26	-0.23441	0.160944	-1.45647	0.145262	0.383505
U2af1	3298.24	0.00102185	0.0611851	0.016701	0.986675	0.993915
Ptpa	3322.62	0.20589	0.0661375	3.11306	0.00185156	0.0240003
Polr2b	3284.97	0.0243488	0.0694357	0.350667	0.725838	0.878884
Chordc1	3212.99	-0.103344	0.0704946	-1.46599	0.142651	0.378949
Slc35a4	3277.89	0.0908577	0.0662612	1.37121	0.170311	0.417567
Rpl21-ps15	3403.16	-0.130645	0.120787	-1.08162	0.279422	0.548093
Zranb2	3282.09	0.0763964	0.080436	0.949779	0.342225	0.614755
Cox7c	3264.03	-0.108115	0.157897	-0.68472	0.493521	0.740538
Ahcyl1	3251.33	0.0356582	0.0464726	0.767295	0.442906	0.700236
Hmgcs1	3302.58	0.0331206	0.0655359	0.505382	0.613291	0.816324
Cd4	3198.49	0.484259	0.117735	4.11312	3.90341e-05	0.00194684
Prps1	3255.54	0.0963568	0.0652634	1.47643	0.139829	0.374767
Usp34	3118.08	0.349962	0.105401	3.32027	0.000899295	0.0149509
Ppp4r3b	3158.91	-0.107324	0.0684107	-1.56881	0.116691	0.336532
Dnajc8	3301.25	-0.0623424	0.0672771	-0.92665	0.354108	0.62546
Psmc2	3245.62	-0.167268	0.0655511	-2.55172	0.0107191	0.0770311
Coro1c	3284.64	0.0852877	0.0729718	1.16878	0.242494	0.507687
Rrp1b	3235.6	0.212038	0.0648044	3.27198	0.00106799	0.0168057
Aprt	3332.08	-0.03962	0.0664401	-0.596326	0.550957	0.777562
Setx	3212.88	-0.0286235	0.0797234	-0.359035	0.719569	0.875267
Tufm	3305.8	-0.015464	0.072894	-0.212144	0.831995	0.932315
Elmo1	3178.75	0.116846	0.0741181	1.57648	0.114915	0.333538
Sptbn1	3224.61	0.00470106	0.0910873	0.0516105	0.958839	0.98379
St6galnac4	3261.54	0.304953	0.068495	4.45219	8.50004e-06	0.000730053
Prelid3b	3222.96	0.008437	0.0855517	0.0986187	0.921441	0.971071
Nip7	3240.55	-0.0505758	0.145157	-0.348421	0.727524	0.880111
Wbp11	3251.84	-0.0041098	0.0719179	-0.0571458	0.954429	0.98197
Rbm17	3292.17	-0.070066	0.0601973	-1.16394	0.244449	0.509629
Timm50	3260.58	0.139022	0.0704203	1.97418	0.0483617	0.199927
Ctps	3211.52	0.252685	0.0737042	3.42837	0.000607224	0.0115774
Bhlhe40	3147.22	0.748048	0.139122	5.37691	7.5776e-08	2.66399e-05
Fmnl1	3174.74	0.493156	0.081113	6.07986	1.20287e-09	1.16557e-06
Cd74	3587.33	0.440748	0.994898	0.443008
Cpsf1	3218.87	0.0997228	0.0636097	1.56773	0.116944	0.337127
Smg5	3215.29	-0.10778	0.0761133	-1.41605	0.156762	0.398443
Atp5j2	3218.53	-0.200766	0.162896	-1.23248	0.217769	0.480178
Tpp2	3137.35	-0.0524987	0.0725389	-0.723732	0.46923	0.721107
Gimap6	3212.53	-0.422729	0.111556	-3.7894	0.000151013	0.00468239
Elavl1	3231.69	0.0829909	0.061363	1.35246	0.176229	0.425417
Kmt2d	3242.41	0.13663	0.0844091	1.61867	0.105519	0.316117
Gtf2i	3195.22	-0.143434	0.0832291	-1.72337	0.0848219	0.278208
Parvg	3209.93	0.21035	0.0649524	3.23853	0.00120149	0.0181358
Psmd14	3177.36	-0.12298	0.0533863	-2.30359	0.0212457	0.120946
Polr1b	3176.12	0.0818746	0.0647522	1.26443	0.206076	0.467041
Lsp1	3284.33	0.630196	0.260306	2.42098	0.0154787	0.097684
Cherp	3171.35	0.113044	0.0669923	1.68741	0.0915242	0.28975
Ppig	3188.92	-0.0945019	0.0682645	-1.38435	0.166252	0.411674
Psma5	3213.04	-0.148605	0.0681437	-2.18075	0.0292018	0.147019
Wdr75	3116.68	-0.0803868	0.0659864	-1.21823	0.223136	0.486798
Psmb2	3197.52	-0.225833	0.0776322	-2.90901	0.00362572	0.0373394
Nfkbia	3160.71	0.463053	0.093986	4.92683	8.35758e-07	0.000135148
Copb1	3124.1	0.0616835	0.0605	1.01956	0.307936	0.579699
Myo9b	3155.39	0.0715206	0.071248	1.00383	0.315462	0.58695
Acsl4	3111.86	-0.0532313	0.0645795	-0.824277	0.409782	0.672999
Idh3a	3109.9	-0.00374004	0.0499048	-0.0749435	0.94026	0.977638
Sh3kbp1	3122.24	-0.117411	0.126409	-0.928824	0.35298	0.624584
Wdr3	3142.67	-0.0501024	0.0694951	-0.720948	0.470942	0.722619
Fxyd5	3215.36	0.0747928	0.0624246	1.19813	0.230866	0.495342
Uhmk1	3089.29	0.329719	0.0762281	4.32543	1.52237e-05	0.00110144
Supt5	3179.52	0.0626729	0.0620178	1.01056	0.312225	0.583558
Nmt1	3147.49	-0.0289094	0.0599441	-0.482273	0.629612	0.825822
Srebf1	3230.79	-0.150211	0.0705282	-2.12981	0.0331876	0.158685
Psmb6	3179.09	0.0218262	0.0868575	0.251287	0.801592	0.916632
Glyr1	3164.1	0.0124781	0.0641685	0.194458	0.845817	0.938705
Pdcd6ip	3061.65	0.303577	0.0692955	4.38091	1.18184e-05	0.000910964
Smc6	3094.93	0.0964908	0.0675999	1.42738	0.15347	0.394246
Rrp12	3158.06	0.105815	0.0696169	1.51996	0.128522	0.355224
Ap2b1	3118.61	0.324538	0.0680318	4.77039	1.83867e-06	0.000252406
Snrpg	3246.28	-0.266023	0.10446	-2.54666	0.0108759	0.0776291
Ube2n	3108.52	-0.0281114	0.0464756	-0.604863	0.54527	0.774297
Tyms	3103.43	-0.0494974	0.09856	-0.502206	0.615522	0.817702
Ccl3	2921.14	1.31805	0.352473	3.73945	0.000184426	0.00530602
Rbmxl1	3136.16	0.03428	0.0767715	0.44652	0.655222	0.840581
Taf10	3178.3	0.0641724	0.0829853	0.773298	0.439346	0.697415
Tnpo3	3096.32	-0.0117645	0.0607428	-0.193677	0.846428	0.938999
Hcls1	3180.26	0.123828	0.087378	1.41715	0.156439	0.398118
Surf4	3130.11	-0.109177	0.0777715	-1.40382	0.160374	0.403146
Hk1	3203.71	-0.098872	0.112395	-0.879687	0.379029	0.646776
Sms	3046.12	0.112338	0.0779853	1.4405	0.149726	0.389768
Prdx6	3111.79	0.120836	0.0744017	1.6241	0.104354	0.313809
Pdha1	3118.54	0.0740847	0.0661014	1.12077	0.262384	0.530008
Sbf1	3086.68	0.178656	0.0673052	2.65442	0.00794443	0.0631263
Me2	3101.97	-0.0531571	0.0718048	-0.7403	0.459118	0.712502
Npepl1	3089.49	0.384572	0.102409	3.75526	0.000173159	0.00506271
Cblb	3064.42	0.26562	0.077205	3.44045	0.000580754	0.0113122
Qars	3108.38	-0.179654	0.0774351	-2.32006	0.0203377	0.117636
Wdr18	3108.84	0.0224725	0.0585118	0.384069	0.700928	0.86594
Fnbp4	3081.2	-0.103145	0.0576717	-1.78848	0.0736986	0.256093
Sdad1	3099.56	-0.095089	0.0631814	-1.50502	0.13232	0.361978
Msh6	3104.25	0.0871232	0.0662692	1.31469	0.188615	0.443259
Nfatc3	3028.05	0.0798197	0.0782943	1.01948	0.307974	0.579699
Arih1	3022.39	0.061147	0.0515661	1.1858	0.235703	0.501094
Tgfb1	3084.5	0.23145	0.0628491	3.68263	0.000230844	0.00606541
Sema4d	3102.73	0.0196655	0.117124	0.167903	0.866659	0.947777
Chd1	3037.61	0.0735395	0.0751904	0.978044	0.328053	0.601062
Smyd5	3090.95	-0.119861	0.065799	-1.82162	0.0685124	0.246006
Galk1	3186.22	-0.159006	0.0771816	-2.06015	0.039384	0.175415
Larp4b	3018.97	0.138643	0.0677574	2.04617	0.0407395	0.17903
Eif3j1	3045.55	-0.129822	0.0778767	-1.66702	0.0955095	0.296627
Zfp36l2	3113.24	-0.0901048	0.0909198	-0.991037	0.321668	0.59473
Gatad2a	3087.19	0.221016	0.0582234	3.796	0.000147052	0.00463809
Mapk1ip1l	3034.24	-0.0174164	0.0578581	-0.301019	0.7634	0.897025
Mbd3	3073.27	0.206921	0.0738029	2.8037	0.00505194	0.0463518
Sar1a	3058.53	-0.00363291	0.0590754	-0.0614963	0.950964	0.981351
Psmd11	3036.07	0.109681	0.0603271	1.8181	0.0690486	0.246964
Hspa14	3016.88	-0.26142	0.0723268	-3.61443	0.000301009	0.00734137
Ankrd13a	3027.83	0.320307	0.0688971	4.64906	3.33456e-06	0.00039397
Atad3a	3059.69	0.203224	0.0723018	2.81077	0.00494224	0.045753
D17Wsu92e	3112.37	0.0302406	0.0654086	0.462333	0.643842	0.833857
Mta1	3026.99	0.110566	0.0677548	1.63186	0.102709	0.310865
Kcnn4	3036.07	0.225541	0.119136	1.89314	0.0583395	0.223348
Hadha	3035.4	0.142405	0.065019	2.1902	0.0285094	0.145002
Slc6a6	3031.42	0.26873	0.0908911	2.95661	0.00311042	0.0336336
Xpo4	2942.87	0.070991	0.0738385	0.961436	0.336333	0.609339
Nol9	3036.91	0.21362	0.0690979	3.09155	0.00199116	0.0252423
Zfp280b	3023.64	-0.250495	0.121247	-2.06599	0.0388295	0.173816
Wasf2	3053.43	0.070614	0.0760588	0.928414	0.353193	0.62473
Atp13a1	3067.36	-0.0674191	0.057569	-1.1711	0.241558	0.506907
Nup50	3026.3	-0.0260769	0.0540344	-0.482598	0.629381	0.825708
Rel	2934.71	0.516319	0.122538	4.21354	2.51398e-05	0.00155522
Nop10	3116.53	-0.0242516	0.121192	-0.200109	0.841396	0.936508
Cox6c	3007.27	-0.166607	0.161988	-1.02852	0.303707	0.575626
Sdhb	3005.2	0.00523315	0.0758358	0.0690063	0.944985	0.979531
Adam10	2993.13	-0.0110892	0.102749	-0.107925	0.914055	0.967768
Safb	3059.85	0.0752828	0.0649907	1.15836	0.246716	0.511679
Acaca	3000.19	0.204047	0.0940759	2.16896	0.0300856	0.149587
Zc3h12d	2998.03	0.133198	0.0965921	1.37897	0.167903	0.414297
Psmd13	3048.02	-0.0305506	0.0783416	-0.389967	0.696561	0.864295
Gfi1	3101.97	-0.420701	0.130175	-3.23182	0.00123005	0.018392
Mcmbp	3004.94	0.0380066	0.051209	0.742187	0.457974	0.711417
Sp1	2984.32	0.155928	0.0663331	2.35068	0.0187391	0.1112
Idi1	2963.51	0.216495	0.0894555	2.42014	0.0155146	0.0978679
Nat10	3008.73	0.0483092	0.0628096	0.769138	0.441812	0.699733
Spcs2	3014.15	-0.267883	0.0598412	-4.47655	7.58575e-06	0.000670804
Dusp11	2972.46	-0.046118	0.0715464	-0.644589	0.519194	0.757992
Aes	3076.5	0.254231	0.0737638	3.44655	0.000567787	0.0111957
Tmed5	2916.29	-0.109568	0.0795684	-1.37703	0.168504	0.41497
Prkcsh	3017.49	-0.224137	0.0974154	-2.30084	0.0214008	0.121541
Smg7	2985.44	-0.039617	0.0858593	-0.461417	0.644499	0.834092
Ints7	2959.95	0.29475	0.0786189	3.7491	0.00017747	0.00513666
Ipo9	2947.88	0.195271	0.0621928	3.13977	0.0016908	0.0226288
Map4k1	2992.1	0.0697659	0.0809596	0.861738	0.388832	0.655741
Hars	2998.81	-0.199796	0.0918986	-2.1741	0.0296979	0.148718
Stk17b	2963.3	-0.220781	0.081877	-2.6965	0.00700734	0.0577825
Dynll1	2953.89	0.0602126	0.0704117	0.855151	0.392468	0.658867
Tomm5	2992.91	-0.261931	0.146455	-1.78848	0.0736993	0.256093
Otud5	3040.65	-0.297238	0.0868494	-3.42245	0.000620584	0.011666
Nol11	2895.37	0.110017	0.0800722	1.37397	0.16945	0.416445
Cul1	2956.57	-0.0164	0.0561665	-0.291988	0.770296	0.89997
Gapvd1	2934.54	0.107469	0.0715664	1.50168	0.133181	0.363711
Cntrl	2930.96	-0.0933115	0.0816001	-1.14352	0.252822	0.518872
Ddx23	2989.61	-0.0210739	0.0670402	-0.314347	0.753257	0.891755
Senp3	2984.77	-0.093685	0.0629557	-1.48811	0.136722	0.369902
Ptprs	2971.29	0.0719889	0.110217	0.653154	0.513657	0.754435
Nabp1	2970.53	0.251646	0.111047	2.26612	0.0234441	0.129096
Cd3d	2984.48	-0.180264	0.103602	-1.73996	0.0818658	0.272457
Sumo1	2947.9	-0.406132	0.129501	-3.13613	0.00171194	0.0228192
Gm12191	3063.82	-0.914443	0.884237	-1.03416	0.301061	0.572825
Sf3b4	2996.52	0.0100802	0.070388	0.143209	0.886125	0.955741
Thap12	2943.82	0.00688161	0.0576815	0.119304	0.905035	0.96413
Fam111a	2988.1	0.101428	0.0947214	1.0708	0.28426	0.552721
Chd3	2947.76	0.158451	0.0990744	1.59931	0.109751	0.324437
Dusp2	2980.5	0.400726	0.128692	3.11383	0.00184676	0.0239665
Psmd12	2924.28	-0.121254	0.0626457	-1.93556	0.0529216	0.211423
Tcea1	2876.7	-0.0489904	0.072364	-0.677	0.498406	0.744386
Cstf2	2881.64	-0.0198316	0.0681276	-0.291095	0.770979	0.89997
Dock8	2895.09	0.189978	0.0908981	2.09001	0.0366165	0.167552
Fignl1	2923.63	0.107493	0.0904249	1.18876	0.234535	0.49994
Atp5e	3022.65	0.13612	0.106075	1.28324	0.199407	0.457903
Fgfr1op2	2868.95	-0.0920417	0.0449773	-2.04641	0.0407165	0.178984
Eed	2923.5	0.0281052	0.0734019	0.382895	0.701798	0.866182
Rer1	2930.54	-0.104934	0.0677547	-1.54873	0.121447	0.343983
Max	2965.66	-0.00788873	0.0739389	-0.106693	0.915033	0.968234
Ndufs2	2952.17	-0.00235634	0.0574675	-0.0410029	0.967294	0.987085
Tsn	2911.16	0.0343999	0.0566855	0.606855	0.543947	0.773373
Picalm	2845.52	-0.281951	0.12369	-2.27949	0.0226381	0.126133
Usp15	2922.02	-0.145323	0.0643943	-2.25676	0.024023	0.130815
Rbm38	2937.22	0.218403	0.0639708	3.41411	0.0006399	0.0118766
Rbm10	2944.55	-0.0777624	0.0628872	-1.23654	0.216259	0.478165
Ociad1	2928.12	-0.0606935	0.0532239	-1.14034	0.254144	0.520641
Ccnb1	2836.38	-0.483514	0.164825	-2.93349	0.00335174	0.0354193
Dnttip2	2900.02	-0.200915	0.0829034	-2.42348	0.0153724	0.0973112
Jund	3013.6	0.157977	0.0831728	1.89938	0.0575141	0.221535
Diaph1	2899.24	0.299948	0.0677916	4.42456	9.66401e-06	0.000785179
Utp6	2898.78	0.0445184	0.0640127	0.695461	0.486766	0.734964
Nifk	2944.25	-0.183211	0.0759906	-2.41096	0.0159104	0.0996234
Lrrfip1	2892.74	-0.0587866	0.0816354	-0.720112	0.471456	0.722779
Rsrp1	2907.43	0.072294	0.0822103	0.879378	0.379196	0.646986
Nras	2872.83	-0.038085	0.0665168	-0.572562	0.566941	0.787956
Grap	2893.1	-0.160742	0.0749994	-2.14325	0.0320933	0.155394
Dgkd	2881.34	0.251674	0.0641387	3.9239	8.71264e-05	0.00325347
Sdhd	2965.37	-0.177993	0.0670531	-2.65451	0.00794229	0.0631263
Rfc2	2907.95	-0.0784292	0.0584463	-1.3419	0.179627	0.430306
Cdc34	2930.17	0.0137192	0.0799888	0.171515	0.863819	0.946197
Atad1	2851.51	-0.0339914	0.0953412	-0.356524	0.721448	0.876133
Clta	2951.23	-0.0959194	0.070532	-1.35994	0.173848	0.422643
Dld	2863.62	-0.0938526	0.0875985	-1.0714	0.283992	0.552423
Tpx2	2890.83	-0.340201	0.148346	-2.29329	0.0218311	0.123232
Cnot9	2908.54	-0.0876912	0.075217	-1.16584	0.243678	0.50887
Psap	2908.75	0.196978	0.0794592	2.47899	0.0131756	0.0883728
Ppp6r3	2843.73	-0.040221	0.0812523	-0.495014	0.62059	0.820481
Nup93	2856.85	0.190914	0.0739213	2.58267	0.00980394	0.0725431
Rnf187	2929.9	0.21983	0.0903388	2.4334	0.0149577	0.095695
Nudt21	2933.65	-0.10729	0.0750711	-1.42918	0.152952	0.393687
Arhgap45	2926.95	-0.206011	0.0769149	-2.67843	0.00739679	0.0598451
Cul3	2806.85	0.0462799	0.0536938	0.861923	0.38873	0.655646
Sltm	2887.99	-0.143361	0.064922	-2.20821	0.0272296	0.141382
Seh1l	2858.04	0.0402531	0.0626256	0.642758	0.520381	0.759023
Helz2	3010.78	-0.0387395	0.125346	-0.309061	0.757275	0.893194
Arhgef2	2847	0.25634	0.0731646	3.50361	0.000459002	0.0096673
Elp2	2857.12	0.043508	0.0627864	0.692953	0.488339	0.736442
Ccni	2901.2	-0.0690188	0.086444	-0.798422	0.424625	0.684156
Adh5	2858.87	0.0882176	0.103722	0.850522	0.395035	0.660857
Taf15	2936.7	0.0232971	0.0891093	0.261444	0.79375	0.912151
Ctsb	2846.65	-0.0251543	0.055132	-0.456255	0.648206	0.836163
Trim27	2864.62	0.11018	0.0531685	2.07229	0.0382387	0.172295
Sf3a3	2859.53	-0.0586766	0.0632674	-0.927438	0.353699	0.625242
Dis3	2800.75	0.116452	0.0609224	1.91147	0.0559439	0.218057
Zfp91	2826.95	-0.146368	0.0664715	-2.20197	0.0276674	0.142683
Tmed10	2867.64	0.025049	0.0583385	0.429374	0.667651	0.847122
Pola1	2794.28	-0.0261076	0.0992961	-0.262927	0.792607	0.911347
Mdfic	2760.33	0.376713	0.108324	3.47766	0.00050582	0.0104007
Cdk2ap1	2905.53	0.122332	0.0864551	1.41498	0.157074	0.398809
Usp9x	2748.75	0.205755	0.0980942	2.09752	0.0359471	0.166231
Ankrd52	2852.44	0.250147	0.103783	2.41028	0.0159403	0.0997234
Ruvbl1	2860.95	-0.00288919	0.0659991	-0.0437762	0.965083	0.986587
Incenp	2883.38	-0.182621	0.108438	-1.68411	0.0921614	0.290927
Snrpa	2854.95	-0.0926808	0.0646575	-1.43341	0.15174	0.392101
Dcun1d5	2861.01	-0.0622862	0.106222	-0.586377	0.557622	0.78156
Pbrm1	2780.91	0.239075	0.0607272	3.93687	8.25499e-05	0.00313951
Lrp10	2861.05	0.114477	0.0643953	1.77771	0.0754507	0.25894
Galnt1	2791.22	0.219616	0.0550083	3.99241	6.54048e-05	0.00271975
Gemin5	2794.8	0.0156113	0.0720997	0.216524	0.82858	0.930724
Slc19a1	2826.67	0.310029	0.083795	3.69986	0.000215722	0.00582256
Nfat5	2680.87	0.534358	0.123847	4.31466	1.59851e-05	0.00112476
Efhd2	2828.75	0.25685	0.0917203	2.80036	0.00510458	0.046568
Yy1	2792.3	0.0466765	0.055408	0.842415	0.399556	0.664727
Plaa	2788.79	-0.0956475	0.051715	-1.84951	0.0643839	0.23632
Phc2	2855.06	0.290328	0.108681	2.67139	0.00755383	0.0607933
Gmfb	2757.72	0.0206298	0.0616684	0.334528	0.737981	0.884375
Cox7a2	2832.8	-0.155636	0.159283	-0.977105	0.328517	0.601683
Zfp706	2794.84	0.111777	0.0567499	1.96965	0.0488787	0.201296
Dtl	2784.88	0.18892	0.0708057	2.66814	0.00762721	0.0612472
Rpl3-ps1	2839.25	-0.0457914	0.0932046	-0.4913	0.623214	0.822627
Btaf1	2749.91	-0.0453973	0.0916661	-0.495246	0.620427	0.820481
Ik	2854.51	-0.151424	0.0589927	-2.56683	0.0102633	0.074904
Usp4	2785.95	0.0426259	0.0623374	0.683793	0.494106	0.74104
Wars	2812.72	0.0547228	0.0647406	0.845262	0.397965	0.663404
Dnajc7	2844.74	-0.106994	0.0642765	-1.66458	0.0959962	0.297952
AU020206	2811.33	-0.355296	0.11247	-3.15902	0.00158301	0.0216681
Prep	2787.14	0.122582	0.0582671	2.1038	0.0353963	0.164847
Mad2l1	2733.18	-0.0811903	0.115818	-0.701016	0.483293	0.733107
Ints1	2798.48	0.134849	0.0749534	1.7991	0.0720027	0.253072
Luc7l	2760.1	0.0171976	0.0562626	0.305667	0.759858	0.895091
Psmd4	2822.62	-0.047718	0.0685363	-0.696245	0.486275	0.73496
Pom121	2773.38	0.390416	0.0975595	4.00183	6.28556e-05	0.0026414
Cpsf2	2754.8	0.0420943	0.0641912	0.655765	0.511975	0.753425
Copg1	2784.45	-0.0163444	0.0694271	-0.235418	0.813884	0.922491
Eif2a	2804.88	-0.261446	0.0637828	-4.09901	4.14916e-05	0.00202047
Ccdc88b	2808.5	-0.0160296	0.100246	-0.159903	0.872957	0.950291
Nop14	2792.68	-0.101306	0.102261	-0.990667	0.321848	0.594759
Osbpl8	2724.72	0.018786	0.0527616	0.356054	0.7218	0.876308
Traf1	2790.49	0.512213	0.223811	2.2886	0.0221028	0.12394
Xpo7	2713.78	0.0707906	0.0727429	0.973162	0.330473	0.603807
Dgka	2750.83	-0.238228	0.12111	-1.96703	0.0491794	0.201671
Gpx4	2823.29	-0.333372	0.136603	-2.44043	0.0146696	0.094523
Atp5h	2751.16	-0.252379	0.0869503	-2.90257	0.00370118	0.0378092
Bag1	2787.42	0.104887	0.0670721	1.56379	0.117866	0.337959
Pno1	2708.88	-0.0574071	0.0647869	-0.886091	0.375568	0.643462
Bptf	2772.55	-0.0354269	0.117508	-0.301486	0.763044	0.896989
Mapk6	2722.29	-0.12536	0.0908235	-1.38026	0.167506	0.413646
Hnrnpr	2770.38	-0.0116916	0.0654832	-0.178543	0.858297	0.944087
Lamp1	2739.56	0.123073	0.0508594	2.41987	0.0155259	0.0978732
Jade2	2720.87	0.565756	0.123322	4.58764	4.48294e-06	0.000463277
Nup88	2707.71	0.0148613	0.0503188	0.295342	0.767733	0.898984
Coa5	2711.71	0.065842	0.0814373	0.8085	0.418803	0.68095
Csnk1d	2764.57	0.126987	0.0564538	2.24941	0.0244867	0.132444
Hipk3	2684.62	0.410466	0.0759726	5.40282	6.56025e-08	2.4246e-05
Rfc5	2746.31	0.216064	0.0667568	3.23658	0.0012097	0.0181821
Foxk2	2742.21	0.0587433	0.0597085	0.983834	0.325197	0.597805
Zc3h18	2749.12	0.180617	0.0762498	2.36876	0.0178479	0.107685
Cish	2793.04	0.00890474	0.131738	0.0675942	0.946109	0.97982
Kmt2a	2670.56	0.238937	0.0924044	2.58577	0.00971612	0.0722773
Zwint	2726.58	0.0112155	0.0732399	0.153134	0.878293	0.952288
Ptk2b	2730.65	0.196949	0.0916011	2.15007	0.0315497	0.154006
Tmem173	2757.58	-0.340001	0.109238	-3.11247	0.00185527	0.0240053
Naa25	2753.72	-0.164082	0.103558	-1.58444	0.113093	0.33097
Smu1	2730.96	-0.0583589	0.0691075	-0.844465	0.398409	0.663816
Ppp4r3a	2660.63	-0.0993859	0.0796112	-1.24839	0.211888	0.472267
Usp36	2747.97	0.0618678	0.0545948	1.13322	0.257122	0.524275
Got1	2742.88	-0.085758	0.0612802	-1.39944	0.161681	0.405234
Nsmce4a	2712.17	-0.152402	0.0739033	-2.06218	0.0391908	0.174999
Ero1l	2788.71	-0.403003	0.161031	-2.50264	0.0123269	0.0843285
Gm15500	2774.45	-0.0438409	0.2747	-0.159596	0.8732	0.950291
Ms4a6b	2729.54	-0.0558258	0.155272	-0.359535	0.719195	0.875123
Cdc42se1	2742.91	-0.0438637	0.0796141	-0.550954	0.581665	0.797121
Trnt1	2731	-0.233149	0.0980156	-2.37869	0.0173742	0.105527
Mcm10	2728.73	-0.116068	0.0643193	-1.80456	0.0711438	0.251648
Samm50	2750.07	0.0642004	0.0640318	1.00263	0.316038	0.587593
Usp19	2711.57	0.0824221	0.055275	1.49113	0.135928	0.368559
Tbl3	2709.85	0.207977	0.0731794	2.84202	0.00448282	0.0425678
Fh1	2699.91	-0.103662	0.0687816	-1.50712	0.13178	0.360979
Utp15	2667.51	0.0166908	0.067075	0.248838	0.803486	0.917669
Pold2	2725.71	0.160623	0.0483088	3.32492	0.000884425	0.0148579
Tgoln1	2697.43	-0.120244	0.0816341	-1.47296	0.140762	0.376069
Prkch	2674.19	-0.0591891	0.11349	-0.521534	0.601995	0.809621
Cdt1	2737.41	-0.14833	0.086037	-1.72403	0.084703	0.277985
Ilf2	2711.17	-0.0397021	0.0583012	-0.680982	0.495883	0.742382
Cbl	2664.91	0.125435	0.0846906	1.4811	0.138581	0.37255
Tcf3	2752.3	0.0730234	0.0874669	0.834869	0.403791	0.667996
Dnajc9	2711.61	0.0375715	0.0610045	0.61588	0.537973	0.76971
Prim1	2664.89	-0.0540736	0.0709608	-0.762021	0.446048	0.702898
Ola1	2683.99	-0.0671013	0.0583849	-1.14929	0.250435	0.51605
Nfe2l1	2757.5	-0.00795761	0.0866848	-0.0917994	0.926857	0.973812
Gnl2	2656.86	0.022755	0.0548783	0.414646	0.678401	0.853717
Ube2d2a	2677.08	0.0391768	0.0505969	0.774292	0.438758	0.696811
Slc29a1	2670.01	0.19622	0.1034	1.89769	0.0577373	0.2218
Taf1	2653.6	-0.167171	0.0836836	-1.99766	0.0457535	0.1933
Zfas1	2689.31	-0.297969	0.108145	-2.75529	0.00586402	0.0511646
Uggt1	2642.22	0.0598954	0.0722738	0.828729	0.407258	0.671251
Oat	2662.1	-0.109691	0.0608804	-1.80175	0.0715848	0.252399
Bach2	2618.08	0.283016	0.110038	2.57199	0.0101116	0.0741345
Epb41	2700.05	0.088969	0.0836231	1.06393	0.287361	0.556424
Heatr3	2654.02	0.134167	0.0659065	2.03571	0.0417792	0.182045
Nol6	2668.73	0.250411	0.0827313	3.02679	0.00247163	0.0291301
Cmtm6	2662.95	0.184134	0.0618903	2.97517	0.00292828	0.0326437
Sash3	2701.59	-0.178139	0.0907508	-1.96295	0.0496521	0.202572
Ldb1	2710.56	-0.200908	0.0615604	-3.26359	0.00110012	0.0170874
Sf3b5	2749.24	0.0744673	0.0868869	0.85706	0.391412	0.657804
Espl1	2646.62	-0.0788783	0.107921	-0.730888	0.464848	0.717148
Ncln	2664.11	0.102439	0.0577199	1.77476	0.0759382	0.259929
Mphosph10	2633.17	-0.21957	0.104728	-2.09657	0.0360315	0.166514
Rtraf	2690.27	-0.169367	0.0689337	-2.45695	0.0140122	0.091639
Rbm8a	2718.51	-0.107586	0.0829224	-1.29742	0.194485	0.451013
Rps16-ps2	2729.11	-0.130722	0.0958422	-1.36393	0.172588	0.420715
Eri1	2622.96	-0.0121008	0.0453339	-0.266925	0.789527	0.909858
Senp1	2613.87	-0.190844	0.0943018	-2.02376	0.0429953	0.185772
Cebpz	2596.78	0.0137302	0.0559248	0.245512	0.80606	0.918262
Mrto4	2657.79	0.0644784	0.0742406	0.868506	0.385117	0.652301
Arpc4	2619.44	0.0240227	0.0578258	0.415432	0.677826	0.853291
Hnrnpll	2558.66	0.177314	0.122769	1.44428	0.14866	0.388326
Uchl5	2637.33	-0.280735	0.0906437	-3.09713	0.00195405	0.0249475
Thumpd1	2627.4	0.143517	0.083611	1.71649	0.0860733	0.280432
Kmt5a	2625.69	-0.0656502	0.0727505	-0.902402	0.366843	0.636147
Dynll2	2637.4	0.363322	0.0966315	3.75987	0.00017	0.00499244
Erbin	2589.63	0.060981	0.0666529	0.914903	0.360242	0.631143
Lsm4	2650.54	-0.00623468	0.0895521	-0.0696208	0.944496	0.979377
Pola2	2656.95	-0.0491528	0.0589073	-0.834409	0.40405	0.66819
Szrd1	2689.19	0.251584	0.0831109	3.02708	0.00246927	0.0291301
Selplg	2659.13	-0.0137519	0.10781	-0.127556	0.8985	0.961985
Eps15	2592.26	0.00584834	0.0687085	0.0851181	0.932167	0.975523
Cd247	2693.15	-0.0972788	0.0950538	-1.02341	0.306115	0.578605
Snrpd3	2686.84	-0.116985	0.0740979	-1.57879	0.114385	0.333005
Isg20l2	2632.07	0.0214166	0.0616644	0.347308	0.72836	0.88031
Nvl	2588.9	0.116639	0.0687662	1.69616	0.0898556	0.286254
Mgea5	2623.07	-0.161426	0.0801718	-2.01351	0.0440615	0.188901
Stoml2	2637.66	-0.106416	0.0757001	-1.40575	0.159798	0.402327
Dhx30	2603.93	0.183022	0.0554506	3.30064	0.000964656	0.0156583
Otulin	2630.34	0.0736255	0.111245	0.661831	0.508079	0.750662
Polr1d	2678.04	-0.0413934	0.0876281	-0.472376	0.636658	0.830406
Cflar	2640.99	-0.0112698	0.13841	-0.0814238	0.935105	0.976427
Wdr12	2591.2	-0.202506	0.080892	-2.50341	0.0123003	0.0841866
Naa20	2609.46	-0.20153	0.131897	-1.52794	0.126529	0.351674
Ikzf3	2724.77	-0.811037	0.279797	-2.89866	0.00374764	0.0380412
Nme1	2601.37	-0.206913	0.105987	-1.95225	0.0509083	0.205963
Gps1	2606.75	0.212321	0.0701753	3.02557	0.00248163	0.0292002
Dtymk	2602.07	-0.107622	0.0718325	-1.49824	0.134072	0.365275
Man1a	2593.05	0.188241	0.109494	1.7192	0.085578	0.279459
Sh3bgrl3	2647.42	0.211453	0.0645024	3.27822	0.00104466	0.0165469
Kif15	2536.32	-0.144373	0.0800274	-1.80405	0.0712239	0.251685
Sec13	2581.21	-0.0375438	0.0545914	-0.687724	0.491627	0.739004
Timeless	2622.04	-0.0117399	0.051855	-0.226398	0.820892	0.927009
Eml4	2563.91	0.0605782	0.0756895	0.800352	0.423507	0.683754
Cars	2625.15	-0.191546	0.0965878	-1.98312	0.0473537	0.196986
Scrib	2612.88	0.0975711	0.0726789	1.3425	0.179435	0.430203
Tram1	2580.56	-0.272356	0.0709623	-3.83804	0.000124022	0.00410723
Tdg	2558.81	0.11425	0.081226	1.40657	0.159554	0.401994
Pdk1	2649.62	-0.519854	0.125882	-4.1297	3.63241e-05	0.00190332
Eef1e1	2560.18	0.113617	0.132579	0.856973	0.39146	0.657804
Qrich1	2543.22	-0.155344	0.0739053	-2.10193	0.0355594	0.16518
Ptcd3	2535.11	-0.196364	0.0731074	-2.68597	0.00723196	0.0589935
Clns1a	2576.96	-0.0914014	0.0560523	-1.63064	0.102966	0.311258
Cox7b	2593.79	-0.185751	0.137711	-1.34884	0.177387	0.427321
Smarcd2	2594.12	0.0831579	0.0638534	1.30233	0.192805	0.449037
Atp5g1	2563.24	0.0146973	0.0615357	0.238841	0.811229	0.92093
Polr2e	2581.18	0.0114601	0.0690629	0.165937	0.868207	0.948356
Rrp9	2624.47	0.114186	0.0819508	1.39334	0.163516	0.407626
Sec31a	2538.76	0.350643	0.0925043	3.79056	0.00015031	0.00468239
Psmb7	2598.1	-0.135799	0.0800856	-1.69567	0.0899485	0.286397
Oxsr1	2554.23	-0.129179	0.0687424	-1.87918	0.0602199	0.227944
Drg1	2533.28	0.101322	0.0652591	1.55262	0.120515	0.34289
Tax1bp1	2509.62	-0.101324	0.0788911	-1.28435	0.199018	0.457271
Poldip3	2584.09	0.137374	0.0567256	2.42172	0.0154472	0.0976296
Uqcr10	2587.83	-0.2195	0.104244	-2.10564	0.0352353	0.164257
Cox6b1	2646.75	-0.136585	0.0880415	-1.55137	0.120812	0.34312
Rab5c	2620.61	0.00571203	0.0658224	0.0867794	0.930847	0.975109
Tbl1x	2492.89	0.0877928	0.0640893	1.36985	0.170733	0.418173
Gtf2h1	2501.95	-0.296838	0.0866008	-3.42766	0.000608803	0.0115922
Mlf2	2582.52	0.234893	0.079009	2.97298	0.0029492	0.032725
Slc2a1	2634.68	-0.441327	0.157894	-2.79508	0.00518872	0.0470083
Morf4l1	2602.4	-0.0101281	0.0843371	-0.12009	0.904412	0.963992
Hirip3	2599.91	-0.0277339	0.0719599	-0.385408	0.699935	0.865573
Hipk1	2504.74	0.112936	0.0706488	1.59856	0.109919	0.324734
Pdia4	2560.23	-0.0533848	0.0736325	-0.725016	0.468442	0.720841
Uqcrh	2591.24	-0.0807026	0.138879	-0.5811	0.561173	0.783808
Brix1	2521.63	-0.15863	0.0524471	-3.02457	0.00248985	0.029273
Ddx42	2517.86	-0.0466753	0.0705048	-0.662016	0.507961	0.750627
Magoh	2488.9	-0.269509	0.141621	-1.90302	0.0570375	0.220787
Ndufv2	2527.5	-0.110585	0.133183	-0.830325	0.406355	0.670538
Usmg5	2539.12	-0.349709	0.233655	-1.49669	0.134474	0.365927
Timm23	2596.7	-0.246808	0.106161	-2.32485	0.0200799	0.116847
Cfdp1	2561.82	-0.166139	0.0958278	-1.73373	0.0829668	0.274537
Snx3	2500.19	0.132244	0.0611462	2.16274	0.0305609	0.151216
Cd8a	2558.06	-0.520311	0.143596	-3.62344	0.000290706	0.00717506
Gnpat	2510.84	0.0902856	0.0653635	1.38128	0.167191	0.413362
Ankhd1	2506.17	0.128165	0.0782154	1.63862	0.101293	0.30809
Slc44a2	2534.53	-0.127834	0.0764081	-1.67304	0.0943193	0.294237
Hp1bp3	2508.17	-0.0746932	0.0819608	-0.911329	0.362122	0.632387
Dnajc5	2543.78	-0.167532	0.0970533	-1.72618	0.0843143	0.277214
Eea1	2418.84	0.0504948	0.0946732	0.533359	0.593785	0.804687
Iars2	2505.54	-0.0289951	0.0727544	-0.398533	0.690237	0.861914
Ube2m	2512.24	0.0162787	0.0660603	0.246421	0.805356	0.918107
Idh3b	2505.34	-0.133547	0.0694692	-1.92239	0.0545566	0.215034
Nedd8	2536.29	-0.162336	0.0864098	-1.87867	0.0602896	0.228028
Ehmt2	2563.76	-0.00869788	0.0685686	-0.126849	0.89906	0.961985
Add1	2537	0.133853	0.0745816	1.79471	0.0726993	0.254342
Usp39	2499.58	-0.192851	0.070323	-2.74236	0.00609991	0.0527185
Mtch2	2497.63	0.0703835	0.060609	1.16127	0.245531	0.510567
Kntc1	2470.9	0.0455077	0.105816	0.430063	0.66715	0.846872
Sp3	2466.9	-0.0999759	0.0776015	-1.28832	0.197633	0.455134
Nploc4	2506.97	0.111723	0.0791127	1.4122	0.157891	0.399551
Adrm1	2542.19	0.164514	0.055434	2.96774	0.00299998	0.0330838
Eif2b5	2512.29	0.110644	0.0472766	2.34036	0.0192654	0.113251
Sipa1	2545.7	-0.0141938	0.0600814	-0.236243	0.813244	0.922129
Ugcg	2499.78	-0.217779	0.0910362	-2.39222	0.0167466	0.10298
Pold3	2495.04	0.0776003	0.0527306	1.47164	0.141119	0.376752
Pwp1	2492.06	0.0972861	0.0588064	1.65435	0.0980573	0.301943
Atp11a	2438.73	-0.197264	0.131774	-1.49698	0.134397	0.365846
Zfr	2471.26	-0.218554	0.0679762	-3.21515	0.00130378	0.0191929
Bmi1	2429.26	-0.0472605	0.0972921	-0.485759	0.627138	0.824477
Birc3	2509.61	0.0398846	0.0964973	0.413324	0.679369	0.854562
Tomm22	2480.64	0.0137351	0.0679181	0.202231	0.839736	0.936128
Wdhd1	2506.58	-0.183676	0.0540844	-3.39611	0.000683513	0.0124239
Gm9616	2509.89	-0.0376269	0.103131	-0.364847	0.715226	0.873379
Rad51	2525.63	0.17932	0.0836953	2.14253	0.0321505	0.155509
Ndufa10	2474.36	0.0162019	0.0603371	0.268523	0.788297	0.909073
Zc3h4	2516.85	-0.111022	0.106888	-1.03868	0.298954	0.570632
Rsrc2	2496.47	-0.141388	0.0741136	-1.90772	0.0564279	0.219469
Gfm1	2487.68	0.0811515	0.0644662	1.25882	0.208094	0.469088
Tma7	2485.83	-0.133215	0.0780723	-1.70631	0.087951	0.283607
Lag3	2539.27	0.364799	0.110862	3.29059	0.000999793	0.0160917
Mia2	2458.38	-0.0294414	0.0727233	-0.404842	0.685594	0.858645
Chd8	2459.74	0.0074213	0.0798812	0.0929043	0.92598	0.973031
Usp5	2499.95	0.185964	0.056512	3.29069	0.00099942	0.0160917
Itsn2	2458.9	0.0320112	0.0620901	0.51556	0.606162	0.812084
Ppip5k2	2400.94	0.0541364	0.10263	0.527491	0.597853	0.807473
Arfgef1	2437.06	0.0515842	0.0788144	0.654501	0.512789	0.753987
Asxl1	2492.24	-0.0953853	0.115753	-0.824043	0.409915	0.673105
Chchd3	2495.42	-0.152021	0.0671363	-2.26436	0.023552	0.129375
Ubqln4	2464.86	0.249268	0.0661058	3.77075	0.000162759	0.00485638
Rpl6l	2467.89	-0.182515	0.0674061	-2.70769	0.00677537	0.0563207
Thoc2	2398.06	0.0925638	0.0651428	1.42094	0.155335	0.396775
Manf	2511.69	-0.251431	0.0920173	-2.73243	0.00628693	0.053653
Vdac3	2452.26	-0.15632	0.0736911	-2.12129	0.0338973	0.16009
Ssr2	2497.2	-0.204288	0.0689502	-2.96283	0.00304824	0.0333041
Atp2a3	2471.94	0.310567	0.075622	4.10683	4.0112e-05	0.00198005
Ube2l3	2442.4	0.0107753	0.0489699	0.220039	0.825841	0.929537
Safb2	2511.82	-0.00785152	0.0810642	-0.0968555	0.922841	0.971504
Cic	2524.12	0.136973	0.0791633	1.73026	0.0835846	0.275717
Ddx54	2477.36	0.305624	0.0621717	4.9158	8.84218e-07	0.000138534
Rlim	2459.51	-0.168912	0.0623603	-2.70864	0.00675594	0.0563056
Prdx2	2445.31	-0.00323405	0.0600289	-0.053875	0.957035	0.983051
Rbm5	2428.25	-0.00467408	0.0632641	-0.0738821	0.941104	0.978155
Trim30a	2670.88	-0.385978	0.279255	-1.38217	0.166919	0.412829
Csnk2b	2457.54	-0.102325	0.067517	-1.51555	0.129633	0.356794
Pdhb	2404.3	-0.105703	0.0605628	-1.74535	0.0809234	0.270508
Rpl22l1	2571.12	-0.0351896	0.226531	-0.155341	0.876552	0.951697
Cops5	2452.49	-0.0523672	0.0911195	-0.574709	0.565488	0.787075
Rela	2466.92	0.31195	0.0624685	4.99371	5.92297e-07	0.000114207
Dhcr24	2463.41	0.201724	0.0769309	2.62214	0.0087379	0.0674963
Elob	2476.26	0.023672	0.0725686	0.326202	0.744272	0.887706
Ubr2	2448	7.03702e-06	0.0816581	8.61766e-05	0.999931	0.999972
Trmt1	2439.84	-0.0939005	0.0718361	-1.30715	0.191162	0.446872
Tox4	2463.97	0.0749126	0.0641878	1.16709	0.243176	0.508433
Zfp598	2469.36	0.00775929	0.0703933	0.110228	0.912229	0.967255
Ccnl1	2418.73	-0.0937108	0.0891954	-1.05062	0.293432	0.564237
Farsa	2485.84	-0.0571569	0.0576464	-0.991509	0.321437	0.594381
Rap1gds1	2445.99	-0.197594	0.108258	-1.82522	0.0679685	0.244619
Sf3b6	2444.89	-0.247526	0.135911	-1.82124	0.06857	0.246006
Atp8b2	2435.78	0.185402	0.0647976	2.86125	0.00421978	0.0408488
Atp5j	2415.05	-0.229336	0.103426	-2.21739	0.0265962	0.139352
Efr3a	2393.83	0.0889219	0.077578	1.14623	0.251702	0.517551
Virma	2422.04	0.150711	0.0803992	1.87454	0.0608561	0.229448
Sec23b	2411.64	-0.0231644	0.0687218	-0.337075	0.73606	0.883939
Minos1	2377.11	-0.0810659	0.111988	-0.723882	0.469138	0.721107
Racgap1	2407.01	-0.207805	0.126881	-1.6378	0.101463	0.308412
Zfp445	2404.26	0.0268978	0.0472884	0.568804	0.569489	0.789261
Tmod3	2419.19	-0.121099	0.0626546	-1.9328	0.0532607	0.211904
Rexo2	2396.82	0.0712164	0.0610372	1.16677	0.243303	0.508519
Cers2	2439.84	0.123273	0.0545775	2.25868	0.0239034	0.13041
Icos	2382.81	-0.0386086	0.0678828	-0.568754	0.569523	0.789261
Tcf20	2424.47	-0.067818	0.084351	-0.803997	0.421399	0.682791
Pafah1b2	2402.81	-0.114703	0.0780439	-1.46972	0.141638	0.377552
Zdhhc5	2427.06	-0.039735	0.089436	-0.444284	0.656837	0.841195
Sart1	2461.33	-0.0624923	0.0642015	-0.973378	0.330366	0.603765
Insig1	2471.89	-0.09069	0.0769991	-1.17781	0.238874	0.504119
Metap1	2357.1	0.171113	0.0590098	2.89974	0.00373478	0.0379909
Vav1	2438.83	-0.0592528	0.0517995	-1.14389	0.252671	0.518803
Snrnp40	2442.88	-0.0501663	0.0529559	-0.947323	0.343474	0.615887
Akr1b3	2380.06	0.28136	0.110732	2.54091	0.0110563	0.0784478
Nup214	2392.92	0.266777	0.0931901	2.86271	0.00420031	0.0407473
Dcaf1	2383.02	0.135573	0.0634722	2.13594	0.0326844	0.157038
Tmed7	2387.6	-0.126704	0.0708033	-1.78951	0.0735321	0.255738
Bub1b	2409.75	-0.360096	0.122876	-2.93056	0.00338353	0.0356883
Amfr	2408.61	0.135041	0.0604936	2.23231	0.0255942	0.13603
Kdm5c	2412.8	0.0866243	0.0863229	1.00349	0.315624	0.587171
Ttc39b	2314.92	0.174432	0.0838395	2.08055	0.0374752	0.169661
Rrs1	2405.16	0.243093	0.083878	2.89817	0.00375344	0.0380732
Psmb5	2429.17	-0.0457721	0.0784535	-0.58343	0.559604	0.78274
Acp1	2410.04	-0.0783261	0.0971398	-0.806323	0.420056	0.681835
Med14	2303.77	0.288727	0.0980976	2.94326	0.00324777	0.0346766
Stard4	2437.7	-0.101743	0.0721122	-1.4109	0.158273	0.400082
Pi4ka	2381.48	0.203617	0.0626746	3.24879	0.00115897	0.0177368
Slc20a1	2367.92	0.271246	0.0847927	3.19894	0.00137936	0.0198781
Tnpo2	2391.16	-0.0444196	0.0942456	-0.471317	0.637414	0.830563
Rilpl2	2388.37	-0.168686	0.123114	-1.37016	0.170636	0.418149
Ikbkap	2364.36	0.0070944	0.0888612	0.0798369	0.936367	0.976967
Trir	2416.67	0.0435689	0.0764704	0.569749	0.568848	0.788994
Gpbp1	2329.58	-0.220014	0.0865943	-2.54075	0.0110615	0.0784478
Paxip1	2376.87	0.225674	0.0593173	3.80452	0.000142077	0.00454079
Actr1a	2400.95	0.0989928	0.0683605	1.4481	0.147589	0.386791
1110004F10Rik	2409.66	0.0292292	0.0557662	0.524138	0.600182	0.808484
Tnrc6a	2365.38	-0.0238016	0.0828111	-0.287421	0.77379	0.901431
2410002F23Rik	2390.6	-8.64886e-05	0.0873061	-0.000990636	0.99921	0.999487
Ddx47	2385.73	-0.0468078	0.0705323	-0.663637	0.506923	0.749802
Ranbp3	2404.07	0.011345	0.061907	0.183258	0.854595	0.943097
Mga	2350.25	0.0411914	0.0740319	0.5564	0.577937	0.794884
Tmem259	2435.96	0.025269	0.0786743	0.321185	0.74807	0.889259
Acap1	2379.26	-0.061816	0.0589287	-1.049	0.29418	0.565224
Adipor2	2401.09	-0.143144	0.0702313	-2.03818	0.0415322	0.181408
Traf7	2391	-0.235197	0.0574376	-4.09483	4.22485e-05	0.0020299
Map3k7	2279.39	0.216556	0.0936663	2.31199	0.0207782	0.119417
Map4	2381.61	0.274907	0.072504	3.79161	0.000149676	0.00468239
Usp14	2304.43	0.0316023	0.0561226	0.563093	0.573371	0.791171
Map4k4	2343.28	0.0762521	0.0845143	0.902239	0.36693	0.636147
Cdk2	2368.93	-0.00138553	0.0663039	-0.0208966	0.983328	0.992539
Cinp	2372.99	-0.138558	0.0599731	-2.31034	0.0208695	0.11959
Nek7	2293.48	0.0520896	0.0883735	0.589426	0.555575	0.780133
Thop1	2380.61	-0.0547666	0.0732431	-0.747738	0.454618	0.709154
Lap3	2350.93	0.0232919	0.0715163	0.325687	0.744661	0.887733
Rcl1	2358	-0.0223858	0.0666236	-0.336005	0.736867	0.884183
Rpf2	2314.14	-0.148853	0.093804	-1.58685	0.112547	0.329927
Ncapg	2308.43	-0.117092	0.0698462	-1.67642	0.0936557	0.293191
Anxa6	2310.96	0.428216	0.0869485	4.92494	8.43857e-07	0.000135148
Blmh	2296.51	-0.0197238	0.0658149	-0.299687	0.764416	0.897454
Trpc4ap	2366.82	0.116381	0.0692491	1.68061	0.092838	0.291858
Utp18	2324.89	0.111372	0.0798142	1.39539	0.1629	0.406797
Med12	2300.12	0.181225	0.103358	1.75337	0.0795387	0.267367
Fkbp3	2326.61	-0.138702	0.111965	-1.23879	0.215423	0.476974
Aurkb	2349.75	-0.103991	0.0968517	-1.07371	0.282953	0.551703
Sfi1	2329.89	0.219104	0.23363	0.937825	0.348335	0.619688
Impdh2-ps	2356.25	0.11741	0.0662495	1.77224	0.0763543	0.260567
Ly9	2377.72	-0.357883	0.088236	-4.05597	4.99263e-05	0.00229298
Tial1	2334.38	-0.0210655	0.055354	-0.380559	0.70353	0.866902
Gramd1a	2317.36	0.0296732	0.0812125	0.365377	0.71483	0.873126
Pole4	2330.98	0.407488	0.124024	3.28557	0.00101776	0.0162459
Cdk17	2285.94	0.0290877	0.0748693	0.388514	0.697636	0.864637
Rps2-ps13	2311.02	-0.103989	0.0882553	-1.17828	0.238686	0.503886
Zc3h14	2291.12	-0.0542345	0.0555443	-0.976419	0.328857	0.602089
Zzz3	2270.12	0.188225	0.073765	2.55168	0.0107204	0.0770311
Slc35e1	2315.13	0.166515	0.0688319	2.41915	0.0155569	0.0979628
Lta4h	2307.93	0.0761795	0.0627445	1.21412	0.224701	0.488439
AI662270	2339.19	-0.240878	0.0801765	-3.00434	0.00266154	0.0304714
Rock1	2250.87	0.0973895	0.052525	1.85416	0.0637169	0.23525
Cdca4	2308.37	0.0530146	0.0707606	0.749211	0.45373	0.708815
Nmd3	2297.44	-0.052792	0.102064	-0.517245	0.604985	0.81164
Orc3	2287.54	-0.035512	0.0650027	-0.546315	0.584849	0.799205
Cops7a	2314.22	0.229071	0.0691452	3.3129	0.000923338	0.0152277
Map2k2	2348.38	0.125635	0.0660524	1.90206	0.0571639	0.221079
Acot7	2307.2	0.269485	0.0701996	3.83884	0.000123619	0.00410723
Rnf20	2304.82	0.0411276	0.059905	0.686547	0.492368	0.739702
Birc5	2275.84	-0.317964	0.103795	-3.06339	0.00218844	0.0268631
Tle3	2329.13	0.181229	0.0951142	1.90539	0.0567297	0.220168
Rae1	2340.75	0.000990441	0.0589688	0.016796	0.986599	0.993915
Srp9	2319.14	-0.19877	0.145971	-1.36171	0.17329	0.421855
Nktr	2279.07	0.115476	0.0704538	1.63903	0.101206	0.307957
Nsd3	2338.9	-0.19352	0.103803	-1.86431	0.0622785	0.232665
Imp4	2310.99	-0.145034	0.0792167	-1.83086	0.0671218	0.242419
Piezo1	2287.39	0.371414	0.0966313	3.84363	0.000121229	0.00407667
Senp6	2275.21	0.0278564	0.0595182	0.468032	0.639761	0.831766
Ostc	2307.49	-0.222108	0.0854574	-2.59906	0.00934806	0.0704354
Rpa2	2326.48	-0.014953	0.0754642	-0.198147	0.84293	0.937355
Idh3g	2270.95	0.00715858	0.0496911	0.144062	0.885452	0.955741
Arglu1	2291.44	0.0770485	0.0713941	1.0792	0.280498	0.549111
Phf5a	2276.97	-0.114654	0.0700421	-1.63693	0.101645	0.308705
Usp10	2278.27	0.122386	0.0613107	1.99616	0.0459165	0.193804
Dnajb6	2317.13	-0.264318	0.0726769	-3.63689	0.00027595	0.00688157
Naa40	2285.64	0.368493	0.0968944	3.80304	0.000142933	0.00455806
Xcl1	2227.54	0.771389	0.404315	1.90789	0.0564052	0.21944
Mier1	2250.81	-0.126361	0.069509	-1.8179	0.069079	0.247009
Gm9800	2391.32	-0.151816	0.10496	-1.44642	0.148059	0.387387
Sidt2	2274.08	0.0172429	0.0788509	0.218678	0.826901	0.929927
Aaas	2274.83	0.113143	0.0813789	1.39032	0.164431	0.408825
Wac	2241.25	-0.0933659	0.0659623	-1.41544	0.156939	0.39861
Clk1	2270.57	-0.257093	0.0830787	-3.09457	0.00197096	0.0250711
Wdr5	2284.33	0.18995	0.0715956	2.6531	0.00797562	0.0632694
Ppil1	2300.83	-0.0897938	0.0818513	-1.09704	0.272626	0.541502
Mettl16	2282.86	-0.0758654	0.0650768	-1.16578	0.243703	0.50887
Exosc8	2297.5	-0.0474474	0.0808934	-0.586543	0.557511	0.781487
Sart3	2299.28	0.0592886	0.0781276	0.758869	0.447931	0.704163
Evl	2303.49	0.190851	0.0868279	2.19803	0.0279467	0.143241
Ddx56	2263.18	0.0711671	0.0598784	1.18853	0.234626	0.500042
Dnajc3	2259.29	-0.188056	0.0615801	-3.05385	0.00225928	0.027435
Ube2c	2213.3	-0.606674	0.225906	-2.68551	0.00724189	0.0590309
Rtel1	2270.24	0.0760851	0.0689069	1.10417	0.269518	0.538066
Cd2	2342.15	-0.372735	0.129212	-2.88469	0.00391801	0.0390663
Rrn3	2225.9	0.121581	0.0693895	1.75215	0.0797475	0.267723
Agps	2237.25	0.0706021	0.0514328	1.37271	0.169844	0.416987
Nop16	2267.57	0.044459	0.0801566	0.554651	0.579133	0.79546
Ppp2r1b	2245.52	0.0782713	0.0814002	0.961561	0.33627	0.609339
Ndufs1	2263.47	-0.129185	0.0692494	-1.86551	0.0621105	0.232665
Imp3	2311.64	0.106707	0.0900863	1.1845	0.236217	0.501735
Dpp8	2221.37	-0.0859111	0.077149	-1.11357	0.265462	0.53359
Zdhhc18	2286.5	0.166911	0.078288	2.13202	0.0330053	0.158086
Nsfl1c	2319.15	0.0209046	0.0980753	0.213149	0.831211	0.93187
Sf3a2	2305.45	0.224294	0.0721796	3.10745	0.0018871	0.0243363
Nudcd2	2244.39	-0.181381	0.101349	-1.78967	0.0735074	0.255738
Slk	2247.56	-0.104113	0.0673734	-1.54532	0.122269	0.345025
Capns1	2271.77	0.179132	0.0634344	2.82389	0.00474442	0.0444436
Ppp1r16b	2267.7	0.130848	0.0624711	2.09453	0.0362129	0.166774
Sumo3	2266.04	0.217577	0.0842211	2.58341	0.00978301	0.0724793
Nf2	2278.64	-0.0678854	0.0889808	-0.762922	0.44551	0.702734
Pwp2	2244.16	0.115925	0.0906134	1.27934	0.200777	0.459614
Gm13835	2242	-0.200399	0.140502	-1.42631	0.15378	0.394663
Eif1ad	2261.98	-0.114948	0.0805946	-1.42625	0.153796	0.394663
Dnajc11	2260.95	-0.15325	0.058293	-2.62896	0.00856472	0.0664922
Ncapd3	2223.39	-0.0447152	0.10184	-0.439074	0.660608	0.842506
Fam162a	2308.35	-0.314719	0.0982449	-3.20341	0.00135808	0.0197333
Hnrnph2	2284.23	-0.273508	0.0919881	-2.97329	0.00294622	0.0327171
Gpat4	2230.57	0.08857	0.0655916	1.35032	0.176912	0.426637
Nptn	2239.16	-0.414574	0.11132	-3.72417	0.000195957	0.00550919
Cpsf3	2231.86	-0.102462	0.0766976	-1.33593	0.181573	0.433283
Rnf145	2251.16	-0.00564946	0.0558406	-0.101171	0.919415	0.970448
Wdr33	2260.33	0.0623564	0.0561252	1.11102	0.266558	0.535047
Dhfr	2252.21	-0.205197	0.105993	-1.93595	0.0528739	0.211291
Taldo1	2281.4	-0.00617505	0.0784887	-0.0786744	0.937292	0.977295
Ppp4r2	2227.02	-0.146237	0.0704062	-2.07705	0.0377968	0.17071
Bcl11b	2222.83	0.118701	0.108445	1.09457	0.273704	0.54272
Abcb1b	2148.03	0.39584	0.125168	3.16246	0.00156441	0.0215883
Srp68	2258.43	-0.00906562	0.0811151	-0.111762	0.911012	0.966648
Gtpbp1	2262.26	0.098728	0.0624624	1.5806	0.11397	0.332325
Arf4	2279.82	0.122754	0.0646816	1.89782	0.0577195	0.2218
Fabp5	2277.97	-0.14758	0.0719108	-2.05227	0.0401433	0.177656
Ier2	2213.61	-0.0560568	0.101602	-0.551728	0.581135	0.796698
Smarcc2	2233.76	0.19024	0.0679539	2.79955	0.00511743	0.0466557
H2afx	2256.15	0.12601	0.0883022	1.42703	0.15357	0.394312
Dnm2	2260.73	0.0448145	0.0588495	0.761509	0.446353	0.703244
Stk26	2161.36	-0.215362	0.102085	-2.10964	0.034889	0.163329
Med1	2235.88	0.16953	0.0760529	2.22911	0.0258069	0.136808
Flii	2214.16	0.22627	0.0588041	3.84786	0.000119152	0.00404108
Prkcq	2223.72	-0.27942	0.111908	-2.49687	0.0125296	0.0853101
Clptm1	2232.62	0.121583	0.0551386	2.20503	0.0274517	0.142181
Cops6	2269.67	0.178909	0.0718375	2.49047	0.0127575	0.0863193
Csnk1g2	2267.17	-0.228667	0.0802919	-2.84795	0.00440021	0.0420867
Sugt1	2240.97	-0.205441	0.0850055	-2.4168	0.0156578	0.0983945
Ccl4	2127.86	0.878013	0.32618	2.6918	0.00710666	0.0582437
Dnajb11	2256.24	-0.118274	0.0807911	-1.46395	0.143209	0.380011
Zdhhc3	2219.33	0.12742	0.0664064	1.91878	0.0550118	0.215707
Tab2	2205.48	0.036868	0.0898029	0.410543	0.681407	0.855955
Senp2	2182.61	0.189645	0.0726524	2.61031	0.00904602	0.0689526
Rabl6	2225.46	0.0321229	0.0597672	0.537466	0.590946	0.803044
Tet3	2228.2	0.0480656	0.0980095	0.490418	0.623838	0.822899
Swi5	2248.35	-0.200452	0.0904291	-2.21667	0.0266456	0.13951
Nans	2246.93	0.0921403	0.0519496	1.77365	0.0761216	0.26028
Mrpl12	2262.72	0.00621661	0.103796	0.0598928	0.952241	0.981351
Copz1	2244.52	0.0588828	0.0717961	0.820139	0.412137	0.675285
Mtap	2164.77	0.184203	0.0686789	2.68209	0.00731629	0.0594459
Ppp3cb	2163.34	-0.0478041	0.0571241	-0.836847	0.402679	0.667643
Gm6863	2263.84	-0.00396619	0.0932263	-0.0425436	0.966065	0.9866
Rassf5	2191.49	-0.0528142	0.0781879	-0.675477	0.499373	0.745041
Ccdc47	2205.74	-0.264353	0.0902092	-2.93045	0.00338474	0.0356883
Tsr1	2200.38	0.135809	0.0802312	1.69272	0.0905096	0.287358
Gak	2211.93	0.0940372	0.0640191	1.46889	0.141862	0.377687
Hnrnpa3	2184.55	-0.122553	0.0659271	-1.85892	0.0630379	0.234183
Orc2	2163.5	-0.0482048	0.0636111	-0.757805	0.448568	0.704704
Zmynd19	2220.28	0.170959	0.0721608	2.36914	0.0178294	0.107661
Tbx21	2246.07	0.028733	0.079461	0.361599	0.717652	0.874337
Etv6	2218.34	-0.145897	0.0942902	-1.54732	0.121786	0.344386
Tmed9	2232.46	-0.0149898	0.0826572	-0.181349	0.856093	0.943405
Suclg1	2206.52	-0.314784	0.0823407	-3.82295	0.000131867	0.00429692
Snhg6	2133.85	-0.304491	0.151445	-2.01057	0.0443711	0.189669
Rnf126	2242.1	0.128281	0.0561056	2.28643	0.0222293	0.124454
Zmpste24	2150.63	-0.0485187	0.0869573	-0.55796	0.576872	0.793982
Tmem131	2177.74	0.137157	0.0890975	1.5394	0.123705	0.347446
Prmt7	2177.53	0.390156	0.0698967	5.5819	2.37909e-08	1.17793e-05
Rab1a	2177.2	-0.0852087	0.0522926	-1.62946	0.103216	0.311767
Dock11	2129.58	0.232305	0.115967	2.00321	0.045155	0.192109
Ltv1	2167.09	0.121778	0.070843	1.71898	0.0856176	0.279459
Fam136a	2192.82	-0.132127	0.0883666	-1.49521	0.134859	0.366461
Glipr2	2205.57	-0.384604	0.157786	-2.43751	0.0147889	0.0949911
Arf5	2219.62	-0.0910864	0.0902082	-1.00974	0.312622	0.583772
Nudt5	2168.87	-0.0309552	0.0607823	-0.509281	0.610555	0.814714
Dr1	2141.68	0.0499262	0.0870008	0.573859	0.566063	0.787259
Afg3l2	2195.09	-0.0710574	0.0718433	-0.989062	0.322633	0.595446
Ogfr	2238.56	-0.031741	0.0810841	-0.391458	0.695459	0.864047
Phf10	2183.35	-0.164897	0.0896529	-1.83928	0.0658744	0.239831
Slc38a10	2167.33	0.0284604	0.0651274	0.436995	0.662115	0.843889
Tm9sf2	2161.06	-0.0136917	0.0535005	-0.255916	0.798015	0.914865
Gm11808	2264.52	0.0851048	0.0937175	0.908099	0.363826	0.633969
Phrf1	2178.53	0.00329357	0.078566	0.0419211	0.966562	0.986802
Msl2	2125.26	0.119199	0.0635005	1.87713	0.0605001	0.228551
Cd3g	2160.11	-0.0816688	0.129805	-0.629166	0.52924	0.764375
Tacc3	2166.89	-0.15535	0.0829879	-1.87196	0.061212	0.230609
Rmnd5a	2148.93	0.106051	0.0719096	1.47478	0.140273	0.375638
Bax	2160.88	0.0618293	0.0977429	0.632571	0.527014	0.762858
Snhg5	2139.19	-0.69571	0.114699	-6.06552	1.31524e-09	1.18487e-06
Trmt6	2143.29	0.101501	0.070015	1.44971	0.14714	0.38617
Snrpb2	2166.86	-0.159186	0.119957	-1.32703	0.1845	0.438263
Msi2	2156.23	-0.00963987	0.074122	-0.130054	0.896524	0.960637
Phip	2184.51	0.0674387	0.138406	0.487252	0.62608	0.824106
Ppif	2147.22	0.297313	0.0804654	3.69491	0.000219961	0.00587134
Trpm7	2092.74	-0.0452462	0.0914545	-0.49474	0.620784	0.820614
Cdkn2aipnl	2130.64	-0.172854	0.0792236	-2.18185	0.0291207	0.146764
Gm2000	2234.56	-0.0325647	0.171743	-0.189613	0.849612	0.94096
Eloc	2175.43	-0.0651555	0.107986	-0.603368	0.546264	0.774528
Rps6ka1	2128.52	0.159685	0.0653496	2.44354	0.0145439	0.0938806
Sh3glb1	2155.93	-0.0124102	0.0633773	-0.195814	0.844756	0.93801
Traf6	2127.02	0.156291	0.0921988	1.69515	0.0900461	0.286581
Herc1	2133.08	0.23311	0.0680384	3.42615	0.0006122	0.0116262
Hsd17b12	2152.44	-0.247314	0.0884182	-2.79709	0.00515645	0.0468042
Nemf	2154.41	-0.206375	0.0689776	-2.99191	0.00277239	0.0314658
Snrpa1	2168	-0.0291425	0.0788464	-0.369611	0.711672	0.871394
Parp14	2235.97	-0.0450608	0.147446	-0.30561	0.759902	0.895091
Cnot10	2140.16	-0.0803677	0.0765081	-1.05045	0.293513	0.564305
Cdc25a	2144.74	0.0584979	0.0705062	0.829686	0.406717	0.670757
Cox7a2l	2151.82	-0.0655028	0.0642893	-1.01887	0.308263	0.579914
Ndufv1	2177.98	-0.0138612	0.0642257	-0.21582	0.829128	0.930864
Ppp3r1	2124.37	-0.0551826	0.0653827	-0.843994	0.398673	0.664024
Park7	2187.48	0.155318	0.078911	1.96827	0.0490371	0.201603
Dcp2	2130.49	-0.030459	0.0666677	-0.456878	0.647759	0.836163
Derl1	2203.6	-0.128486	0.0593803	-2.16377	0.0304817	0.151036
Adipor1	2147.13	0.0793766	0.0571802	1.38818	0.165081	0.40969
Ltn1	2114.52	-0.0468238	0.0818467	-0.572091	0.56726	0.788247
Iws1	2121.05	0.0585259	0.0536343	1.0912	0.275183	0.54407
Akap13	2123.01	0.255924	0.0887207	2.8846	0.00391909	0.0390663
Mrpl30	2157.3	-0.205851	0.109726	-1.87604	0.0606499	0.22891
Tmem30a	2084.43	0.138215	0.0674539	2.04904	0.0404585	0.178344
Dnajc13	2099.42	0.196635	0.0738417	2.66293	0.00774627	0.061996
Fmr1	2112.22	0.0768199	0.0799391	0.960981	0.336562	0.6096
Rab8a	2176.89	-0.180866	0.0692388	-2.6122	0.00899607	0.0687901
Ppp1r12a	2122.61	0.131811	0.0673739	1.95642	0.050416	0.204703
Fxr1	2149.44	-0.273299	0.0662196	-4.12716	3.67266e-05	0.00190332
Napa	2143.48	0.0243901	0.0601474	0.405506	0.685105	0.858645
Igf2r	2070.5	0.468707	0.12327	3.80229	0.000143365	0.00456172
Stag1	2080.57	0.0650472	0.056803	1.14514	0.252152	0.518034
Ssr4	2156.76	0.117877	0.112067	1.05184	0.292871	0.563535
Rock2	2101.18	0.141231	0.0650793	2.17014	0.0299963	0.149458
Tapbpl	2159.97	-0.0130553	0.0848781	-0.153812	0.877758	0.952209
Mllt3	2124.26	-0.508631	0.137059	-3.71104	0.000206406	0.00567774
Sdcbp	2137.87	-0.069221	0.102631	-0.674467	0.500015	0.745393
Gnl3l	2106.28	-0.0170198	0.0767945	-0.221628	0.824603	0.929001
Cndp2	2149.03	0.0396888	0.0635125	0.624896	0.532039	0.765885
4932438A13Rik	2089.85	-0.0151265	0.111342	-0.135856	0.891935	0.957928
Carmil2	2155.85	0.0796728	0.0782514	1.01817	0.308599	0.58032
Arhgef3	2075.15	0.261635	0.163508	1.60013	0.109569	0.324296
Smpd4	2109.46	-0.179082	0.0771062	-2.32254	0.0202041	0.117111
Stk24	2122.19	0.0852569	0.0639794	1.33257	0.182673	0.435072
Ikbkb	2118.21	-0.142949	0.0663966	-2.15296	0.0313221	0.15337
Fbxw11	2111.38	0.157921	0.0690025	2.28863	0.0221008	0.12394
Nipbl	2075.52	0.176878	0.0654912	2.70078	0.00691766	0.0572395
Abca2	2122.02	0.0102628	0.103157	0.0994874	0.920751	0.970722
Zfp62	2071.53	-0.126045	0.0799632	-1.57629	0.114959	0.333538
Mtf2	2084.89	-0.178013	0.0701349	-2.53814	0.0111442	0.078891
Cdc6	2137.78	-0.0368405	0.0757983	-0.486034	0.626943	0.824477
Ints3	2116.16	-0.0897363	0.0985743	-0.910342	0.362642	0.633054
Elf1	2111.19	-0.0444945	0.0912351	-0.48769	0.625769	0.824033
Nup133	2109.66	0.0922703	0.0633177	1.45726	0.145045	0.383189
Cnot2	2117.58	-0.0849145	0.0695374	-1.22113	0.222035	0.485648
Bap1	2126.09	-0.0410487	0.065179	-0.629784	0.528836	0.764175
Wsb1	2091.26	-0.109528	0.0685537	-1.5977	0.110109	0.325227
Heg1	2102.08	0.635506	0.113341	5.60705	2.05809e-08	1.09871e-05
Eif4e2	2132.44	-0.0223046	0.0554825	-0.402012	0.687676	0.859982
Prps2	2103.38	0.214066	0.0654959	3.26838	0.00108164	0.0169111
Mpp6	2101.24	-0.0145006	0.0548219	-0.264504	0.791391	0.910602
Ankfy1	2101.95	0.0678479	0.0707596	0.95885	0.337634	0.611006
Gtf3c1	2079.32	0.314533	0.0849836	3.7011	0.000214666	0.00582256
Cyld	2106.56	-0.066641	0.0732669	-0.909565	0.363052	0.633496
Pmpca	2089.55	0.171298	0.0525402	3.26032	0.00111286	0.0171927
Ube2z	2143.09	0.0375085	0.0611509	0.613376	0.539627	0.770652
Cops4	2102.15	0.00753091	0.0566737	0.132882	0.894287	0.959524
Rad50	2095.85	-0.025273	0.0750474	-0.33676	0.736298	0.883973
Tecr	2159.29	0.0423384	0.059412	0.712623	0.476079	0.726697
Aimp1	2111.11	-0.197775	0.0645591	-3.06347	0.00218785	0.0268631
Adk	2093.47	-0.294315	0.119477	-2.46337	0.0137638	0.0908867
Irak1	2096.48	0.266975	0.0716024	3.72857	0.000192568	0.00547374
Ggnbp2	2103.03	-0.199578	0.061489	-3.24575	0.00117141	0.0178674
Dhx16	2117.17	-0.0226006	0.0648454	-0.34853	0.727442	0.880087
Arl8b	2071.12	0.0803141	0.0609759	1.31714	0.18779	0.442216
Orc6	2099.29	0.0502691	0.10124	0.496534	0.619518	0.820069
Selenoh	2142.05	-0.309939	0.0845196	-3.66706	0.000245355	0.006304
1700020I14Rik	2113.8	-0.0267568	0.061866	-0.432496	0.665381	0.846025
Ythdf1	2117.87	0.0209248	0.0557147	0.37557	0.707236	0.869063
Nob1	2134.9	-0.0288989	0.059833	-0.482992	0.629101	0.825708
Gm7964	2061.08	-0.121353	0.0819408	-1.48098	0.138611	0.37255
Zfp638	2061.94	0.0812392	0.113631	0.714939	0.474647	0.725741
Phf20l1	2042.21	0.0534657	0.0815034	0.655993	0.511828	0.753425
Golph3	2067.08	-0.117353	0.0668143	-1.7564	0.0790204	0.266465
Cbx1	2118.28	0.00949878	0.062892	0.151033	0.879949	0.953078
Klf6	2068.9	0.652346	0.169919	3.83917	0.000123452	0.00410723
Tor1aip2	2106.03	-0.223412	0.0693555	-3.22125	0.00127632	0.0188686
Cdc45	2102.84	-0.00474737	0.0539375	-0.088016	0.929864	0.974902
Atp5l	2103.82	-0.225629	0.142231	-1.58635	0.112659	0.330189
Dcaf8	2110.48	-0.0313977	0.0577389	-0.543787	0.586588	0.800329
Ctsz	2183.4	-0.00485716	0.289508	-0.0167773	0.986614	0.993915
Stk11	2139.27	-0.20483	0.0736362	-2.78165	0.00540825	0.048299
Ube3a	2027.53	0.000627715	0.0823039	0.0076268	0.993915	0.997382
Vim	2013.58	0.793663	0.353445	2.2455	0.0247358	0.133237
Ndc1	2036.57	-0.0441424	0.0854722	-0.516453	0.605538	0.811675
Bub1	2053.74	-0.101885	0.0775569	-1.31368	0.188953	0.443649
Bcas2	2073.51	0.0515093	0.0696326	0.73973	0.459464	0.712579
Ibtk	2075.51	0.1005	0.0624685	1.6088	0.107659	0.320553
Setdb1	2069.7	0.0992629	0.0642969	1.54382	0.122631	0.345768
Tmx1	2053.46	-0.0608214	0.0618752	-0.982969	0.325622	0.598206
Pds5b	2048.47	0.0481651	0.0787508	0.611614	0.540793	0.771782
Tsnax	2081	0.205364	0.066371	3.09418	0.00197356	0.0250711
Carm1	2062.08	0.292183	0.0798998	3.65686	0.000255319	0.00647917
Gtf2f1	2110.78	0.0176497	0.0677621	0.260466	0.794504	0.912654
9530068E07Rik	2065.12	0.306773	0.0722977	4.24319	2.20364e-05	0.001418
Psph	2121.53	-0.431969	0.0942363	-4.58389	4.56399e-06	0.000463277
Gfpt1	1996.35	0.367877	0.086581	4.24893	2.14791e-05	0.00138834
Rbx1	2050.42	-0.0136615	0.0843783	-0.161908	0.871379	0.94929
Pde7a	1994.53	0.1768	0.0930471	1.90011	0.0574181	0.221467
Marcksl1	2097.85	0.0873939	0.162274	0.538557	0.590192	0.802735
Aff3	2066.75	-0.000280087	0.111893	-0.00250318	0.998003	0.999042
Gimap1	2069.4	-0.0133827	0.0761034	-0.175849	0.860413	0.944608
Clspn	2062.51	0.128993	0.075788	1.70202	0.0887507	0.284871
Itm2a	2030.33	0.583109	0.346096	1.68482	0.0920232	0.290627
Mbd2	2049.08	-0.210602	0.0723745	-2.90989	0.00361555	0.0373394
Mybl2	2111.2	0.140989	0.0900715	1.5653	0.117512	0.337584
Sumo2	1992.52	-0.594993	0.583292	-1.02006	0.307701	0.579613
Msh2	2067.29	0.080096	0.079408	1.00866	0.313136	0.584491
Pck2	2131.98	0.0399781	0.133266	0.299987	0.764187	0.897425
Gar1	2110.06	-0.0953196	0.118695	-0.803064	0.421937	0.683042
Scaf1	2061.24	0.22468	0.0807597	2.78208	0.00540112	0.0482652
Rbm33	2051.82	-0.0369	0.0623525	-0.591796	0.553987	0.778884
Letm1	2065.98	0.143106	0.0665594	2.15005	0.0315512	0.154006
Rpl31-ps8	2138.54	-0.197145	0.169389	-1.16386	0.244482	0.509629
Thoc1	2010.4	-0.109504	0.101838	-1.07528	0.282251	0.551035
Tmem167	2043.4	-0.0220831	0.0895347	-0.246643	0.805185	0.918046
Casp8ap2	2023.91	-0.201018	0.0927705	-2.16683	0.0302475	0.150133
Trim44	2062.16	0.181916	0.0696702	2.61109	0.00902529	0.068831
Emc10	2078.3	0.363853	0.0794515	4.57956	4.65954e-06	0.000468428
Pelp1	2080.92	0.111664	0.0626352	1.78277	0.0746234	0.257696
Tk1	2084.08	-0.053289	0.0582859	-0.91427	0.360575	0.631422
Cdk9	2067.32	0.0870013	0.0623235	1.39596	0.162726	0.406575
Mrpl3	2024.69	-0.0447049	0.0635113	-0.703888	0.481502	0.731721
Atf1	2029.5	0.0365648	0.0583076	0.627101	0.530593	0.765413
Hax1	2098.88	-0.35502	0.0963831	-3.68342	0.000230125	0.00606402
Nutf2	2047.26	0.0601831	0.0554631	1.0851	0.277877	0.546502
Ipo11	2015.43	-0.065728	0.0705288	-0.931931	0.351372	0.622961
Xrcc6	2068.99	-0.0744002	0.0690962	-1.07676	0.281586	0.550492
Ube2q1	2046.02	-0.0115985	0.0517675	-0.22405	0.822719	0.927908
D16Ertd472e	2018.95	0.0602775	0.0596622	1.01031	0.312345	0.583558
Bst2	2134.78	-0.040139	0.12468	-0.321938	0.7475	0.889259
Pdpk1	2018.38	0.141677	0.0676428	2.09448	0.0362171	0.166774
Xrcc5	1997.7	0.044281	0.100108	0.442333	0.658248	0.841546
Rab14	2026.47	-0.121841	0.0829312	-1.46918	0.141785	0.377626
Smarce1	2059.05	-0.0131055	0.0656662	-0.199578	0.84181	0.936688
Rrp7a	2054.93	-0.0590021	0.0512591	-1.15106	0.249709	0.515134
Rpl23a-ps3	2066.48	0.0389366	0.0948802	0.410377	0.68153	0.855955
Bdp1	1981.32	0.081842	0.0767044	1.06698	0.285981	0.554721
Ppp2r2a	2002.82	0.0394947	0.0542688	0.727761	0.46676	0.71879
Cdc5l	2018.83	0.109301	0.0633871	1.72435	0.0846454	0.277922
Ddx52	1995.12	-0.175786	0.0924143	-1.90215	0.0571512	0.221079
Rps6ka3	1994.22	-0.0500259	0.0804631	-0.621725	0.534123	0.767199
Sp110	2074.95	0.0509885	0.0819772	0.621984	0.533952	0.76714
Cabin1	2020.67	-0.046035	0.094871	-0.485238	0.627507	0.824662
Ap1g1	1999.45	0.135016	0.0697731	1.93507	0.0529817	0.211487
Mllt1	2026.92	0.286252	0.0563254	5.08212	3.73245e-07	8.40617e-05
Nop9	2036.9	-0.045042	0.0837279	-0.537957	0.590607	0.802884
Ap1m1	2008.08	0.27272	0.0687372	3.96757	7.26094e-05	0.00286571
Ubxn1	2055.17	-0.327021	0.0894795	-3.65471	0.000257477	0.00648823
[truncated: 12,722 more rows]

## Sheet: TCox10AOX_vs_WT
gene_name	baseMean	log2FoldChange	lfcSE	stat	pvalue	padj
Eef1a1	188758	0.0538062	0.0627905	0.856916	0.391491	0.690589
mt-Co1	168916	0.145674	0.0906928	1.60623	0.108223	0.355114
Eef2	98404.4	-0.00694527	0.0416545	-0.166735	0.867579	0.950406
Hsp90ab1	89481	-0.0331129	0.0474939	-0.697203	0.485675	0.757681
mt-Nd1	84079.1	0.24011	0.0955065	2.51407	0.0119348	0.0989621
Hspa8	79017.4	0.0626964	0.0432952	1.44812	0.147585	0.420863
Rpsa	79140.5	0.0732796	0.0623883	1.17457	0.240166	0.542558
Actb	78913.6	-0.1185	0.0592932	-1.99855	0.0456574	0.218753
Rplp0	73058.2	0.020432	0.0405809	0.503488	0.614621	0.828441
Npm1	67982.1	0.145676	0.0887575	1.64128	0.100739	0.341044
Ncl	66936.3	0.159458	0.0689193	2.31369	0.0206847	0.137118
Rpl4	65372.4	0.0576045	0.0533684	1.07938	0.28042	0.588543
Ldha	53079.3	-0.188811	0.0678485	-2.78283	0.00538862	0.0585998
mt-Cytb	51165.3	0.285034	0.0906368	3.14479	0.00166204	0.0268829
Tubb5	49968.7	-0.010578	0.0575033	-0.183955	0.854049	0.944006
Pkm	47467.9	-0.270289	0.0769152	-3.51412	0.000441221	0.0111976
Rpl7	45849.7	0.0282535	0.0946599	0.298474	0.765341	0.902708
Rps2	45979	-0.0255424	0.0478176	-0.534162	0.593229	0.818245
Hsp90aa1	44961.6	-0.0452682	0.0641394	-0.705777	0.480327	0.754595
Rps4x	44549.3	0.0678853	0.076634	0.885838	0.375705	0.677324
Rplp1	45417.8	0.0816985	0.0999248	0.8176	0.413586	0.708445
Ptma	43945.1	-0.0193038	0.06323	-0.305294	0.760142	0.900298
Rack1	43129.9	0.0204525	0.0630779	0.324242	0.745755	0.895186
Rpl3	42934.2	0.0977648	0.0382024	2.55912	0.0104936	0.0905356
Pabpc1	41421.3	-0.160006	0.0326258	-4.90428	9.37695e-07	0.000129263
Rps3a1	41836.3	-0.107636	0.090962	-1.1833	0.236689	0.538647
Ppia	40770.1	0.0180288	0.0924406	0.195031	0.845369	0.939833
Tpt1	39946.6	-0.157296	0.0880574	-1.78629	0.0740531	0.286705
Rpl5	40035.2	0.0182116	0.0923436	0.197215	0.843659	0.939714
Eno1	40537.6	-0.233515	0.127178	-1.83612	0.0663396	0.270328
Rpl13	40082	-0.0214804	0.0690352	-0.311152	0.755685	0.899031
Rpl41	39420.2	0.0816795	0.103063	0.792521	0.428057	0.71824
Rps3	37887.8	-0.0156209	0.102486	-0.15242	0.878856	0.954553
Eif5a	36665.4	-0.0727385	0.0460719	-1.5788	0.114381	0.365916
Rpl6	36836.3	0.120851	0.0456576	2.6469	0.00812336	0.0766883
mt-Nd2	34199.8	0.165979	0.0751999	2.20717	0.027302	0.162672
Tmsb4x	34409	-0.0778364	0.109241	-0.712521	0.476142	0.752388
mt-Nd5	32615.5	0.110852	0.0790466	1.40236	0.160806	0.439752
Actg1	32672.6	0.0371962	0.0765023	0.48621	0.626818	0.835962
Hspd1	32845.5	0.122283	0.0647567	1.88835	0.0589791	0.252072
Rpl8	33420.2	-0.103518	0.0498214	-2.07778	0.0377295	0.195097
Rpl12	32800	-0.0323708	0.101536	-0.318812	0.749869	0.897012
Rps18	32829.1	0.00325461	0.114145	0.0285131	0.977253	0.992035
Rps26	31321.2	0.0613107	0.0974804	0.628954	0.529379	0.783158
Rpl10	31587.6	0.128344	0.0571723	2.24487	0.0247767	0.154391
Rps6	31095.1	-0.034947	0.0580262	-0.602262	0.546999	0.791857
Rps24	31414	-0.00832609	0.0968866	-0.0859365	0.931517	0.975636
Rps5	30374.3	0.0793228	0.0841522	0.942612	0.345879	0.651098
Eif4g2	29376.7	0.060139	0.0467926	1.28523	0.198713	0.493019
Eif4a1	29865.6	0.193455	0.0565821	3.41901	0.000628486	0.0142677
Rps8	29162.3	0.131475	0.0549488	2.39268	0.0167258	0.120774
Atp5b	28847.9	-0.0362216	0.034552	-1.04832	0.294492	0.603867
Serbp1	29118.8	0.0352624	0.0557265	0.632777	0.526879	0.781175
Tuba1b	28933.3	0.0466692	0.0381342	1.22381	0.221022	0.520845
Rps14	29132.3	-0.0769158	0.13054	-0.589213	0.555718	0.796199
Hnrnpu	28548.3	0.0132761	0.0461556	0.287637	0.773624	0.90585
Eef1g	28564.6	-0.0556044	0.0401768	-1.38399	0.166361	0.44897
Rpl18a	28313.5	0.0747809	0.102251	0.731348	0.464567	0.743102
Hnrnpa2b1	27868.2	0.116618	0.0543121	2.14719	0.0317781	0.177732
Hnrnpa1	27971.5	0.149129	0.0791594	1.88391	0.0595767	0.253366
Ybx1	27283.4	-0.189657	0.0448689	-4.22693	2.36902e-05	0.00144415
Rpl10a	27135.4	0.0243169	0.066894	0.363514	0.716221	0.879724
Cfl1	25539.2	-0.00661691	0.0543253	-0.121802	0.903056	0.96408
Aldoa	25933.6	-0.300666	0.0909328	-3.30647	0.000944809	0.0185161
Rpl27a	25383.3	0.122881	0.0699924	1.75563	0.0791521	0.298595
Gzmb	24249.9	-0.367045	0.318946	-1.15081	0.249812	0.552889
B2m	24508.3	-0.189889	0.0766649	-2.47687	0.013254	0.106058
Rps9	24800	-0.136508	0.0506975	-2.69261	0.00708962	0.070128
Ptprc	23204.2	0.114055	0.0850427	1.34115	0.179872	0.468037
Set	23772.8	0.0486427	0.0497861	0.977034	0.328552	0.636899
Pgk1	24089.7	-0.227292	0.0990374	-2.29502	0.0217322	0.141434
Rps25	23555	0.0189907	0.113847	0.166809	0.86752	0.950406
Rpl18	23590.4	0.0654348	0.0650129	1.00649	0.31418	0.622866
Rps20	23523.6	-0.0412557	0.0685761	-0.601605	0.547437	0.791857
mt-Rnr2	22314.5	-0.0585318	0.119183	-0.491109	0.623349	0.834181
Rps7	23001.5	-0.172927	0.167195	-1.03428	0.301005	0.611128
Rpl14	22845.2	0.0374838	0.0517589	0.724199	0.468943	0.746172
Lcp1	22306.1	0.0943699	0.0481784	1.95876	0.050141	0.230742
Rpl32	22800.9	0.0231174	0.0641136	0.360569	0.718421	0.881299
mt-Nd4	22104.4	0.106006	0.0891641	1.18889	0.234483	0.5366
Cnbp	21986.1	0.00600582	0.0700763	0.0857039	0.931702	0.975636
Tfrc	21832.3	0.0439921	0.0939219	0.46839	0.639505	0.844504
Ran	22240.4	0.0100283	0.0523102	0.191709	0.847971	0.941025
Atp5a1	21704.2	-0.0433223	0.0405706	-1.06782	0.2856	0.594497
Ddx5	21266.1	0.127098	0.0443857	2.86348	0.00419014	0.0495909
Rpl26	20888.4	-0.0374532	0.118312	-0.316564	0.751575	0.897456
Rps16	21071.8	0.0957657	0.0738298	1.29711	0.194592	0.487122
Rps23	20658.2	0.0539055	0.082054	0.656952	0.511212	0.772247
Pfn1	20610.7	-0.104552	0.0433353	-2.41263	0.0158377	0.116904
Kpnb1	19441	0.0253405	0.0581749	0.435592	0.663133	0.854845
Slc25a5	19519.2	0.0884113	0.0520662	1.69805	0.0894975	0.319698
Rpl19	19701.2	-0.0714186	0.0622582	-1.14714	0.251326	0.55482
Rps27a	19181.7	0.281345	0.315916	0.890569	0.37316	0.675671
Rps12	18800.8	-0.0573229	0.0973619	-0.58876	0.556022	0.796258
Top2a	18949.5	0.320483	0.0808036	3.96619	7.30297e-05	0.00320035
Rpl34	19645.6	-0.0375769	0.142927	-0.262911	0.792619	0.914654
Eef1b2	19304.1	-0.0190129	0.0578316	-0.328763	0.742335	0.893291
Rpl11	19497.1	0.0127025	0.100818	0.125994	0.899737	0.963175
Eif4g1	18686.2	0.0494663	0.0619524	0.798456	0.424606	0.71551
Irf4	18349.8	0.244901	0.0911957	2.68544	0.00724342	0.0711764
Hnrnpab	18585.8	-0.162179	0.0677215	-2.39479	0.0166299	0.12044
Mybbp1a	18003.7	0.118332	0.0547311	2.16207	0.0306131	0.174405
Hspa9	18001.5	0.0886915	0.0545545	1.62574	0.104005	0.34712
Mif	18478.4	-0.163192	0.0488337	-3.34178	0.000832422	0.0173006
Nap1l1	17665.3	0.00658914	0.0465644	0.141506	0.88747	0.958337
Rpl15	18140.8	-0.0337073	0.0888186	-0.379508	0.704311	0.874334
Rps15	18376.8	0.0201836	0.0695295	0.290288	0.771596	0.904895
Odc1	17226.2	0.167078	0.055591	3.00548	0.00265162	0.0367201
Rpl9	17803.7	0.109376	0.0628789	1.73946	0.0819533	0.304215
Rps17	17832.3	0.0255216	0.10325	0.247183	0.804766	0.921263
Tpi1	18181.5	-0.350405	0.111169	-3.15202	0.00162147	0.0265094
Pcna	17459.2	-0.0421517	0.0862134	-0.488923	0.624896	0.834961
Hspa5	17282.8	-0.0658332	0.0497166	-1.32417	0.185447	0.475614
Rpl31	17459.9	-0.052317	0.128144	-0.408268	0.683077	0.864158
Hnrnpk	17139.3	0.0923019	0.0525826	1.75537	0.0791962	0.298595
Rps15a	17210.8	-0.03877	0.109114	-0.355317	0.722352	0.88353
Rps19	17204.8	-0.0177168	0.0741448	-0.238949	0.811145	0.924234
Scd2	16981.9	-0.499032	0.122136	-4.08586	4.39142e-05	0.00224478
Eif3a	16079.4	0.192988	0.0671458	2.87417	0.00405092	0.0484635
Rpl37a	16420.9	0.0825927	0.0937277	0.881199	0.37821	0.678808
Ddx21	15847.9	0.166612	0.0702355	2.3722	0.0176827	0.124991
Coro1a	16174.8	-0.0363682	0.0740912	-0.490857	0.623528	0.834236
Rplp2	16065.7	-0.201313	0.078528	-2.56358	0.01036	0.0898513
Eif4b	15717.3	0.0926916	0.0405677	2.28486	0.0223209	0.143797
Rpl28	16205.2	-0.0278701	0.0496349	-0.561501	0.574456	0.805611
Ipo5	15399	0.145398	0.0473457	3.07099	0.00213353	0.0319529
Eif3c	15381.4	0.147579	0.0639159	2.30896	0.0209457	0.138093
Cct8	15086.3	0.108531	0.0449482	2.41459	0.0157529	0.116613
Rps13	15361.1	-0.0413009	0.0601324	-0.686833	0.492188	0.762108
Rps11	15237.7	-0.0220935	0.0610336	-0.361989	0.71736	0.880264
Naca	14663.6	0.0823624	0.0775003	1.06274	0.287901	0.59681
Myh9	14417.4	0.104086	0.0838021	1.24205	0.21422	0.51226
Rpl27	14584	0.100284	0.0837383	1.19759	0.231078	0.53293
Cct2	14415.8	0.135575	0.0498481	2.71976	0.00653295	0.066766
Srrm2	14359.2	0.0772018	0.0697209	1.1073	0.268165	0.573303
Calm1	14237.4	0.00970031	0.0545503	0.177823	0.858862	0.945621
G3bp1	14324.8	0.033129	0.0537648	0.616183	0.537774	0.787313
Rcc2	14376.8	-0.126035	0.0455895	-2.76455	0.00570005	0.0611382
Rpl29	13856.3	-0.117884	0.0737344	-1.59876	0.109874	0.357723
Cct5	14097.1	0.157542	0.0390236	4.03709	5.41179e-05	0.00260518
Srsf1	13948.9	0.0106494	0.0432567	0.246192	0.805534	0.921532
Ddx3x	13726.8	0.235954	0.0611625	3.85782	0.000114405	0.0043919
Tcp1	13806.8	0.177857	0.0469761	3.78613	0.000153015	0.00525507
Actr3	13859.5	-0.0231777	0.0436368	-0.53115	0.595315	0.819537
Tpm3	13810.6	0.012625	0.0434214	0.290756	0.771238	0.904562
Ccnd2	13785.1	-0.0531857	0.095142	-0.559014	0.576152	0.806334
Pa2g4	13796.1	0.0130204	0.0467283	0.278641	0.78052	0.90973
Rpl23	13963.7	0.0561416	0.0904463	0.620717	0.534786	0.785802
Ptbp1	13637.6	-0.00540724	0.0467933	-0.115556	0.908005	0.965892
Gbp2	14088.7	-0.518832	0.114696	-4.52355	6.08101e-06	0.000585466
Fasn	13440.9	-0.163989	0.0773944	-2.11888	0.034101	0.184368
Hmgb2	13557	-0.0600313	0.0855168	-0.701982	0.48269	0.755843
Srsf3	13457.5	0.0671	0.0778686	0.861709	0.388848	0.687924
Caprin1	13334	0.0580757	0.0391959	1.48168	0.138426	0.407107
Mki67	13090.9	0.0771981	0.0872143	0.885154	0.376073	0.677324
Gm23935	14549.6	0.816075	0.340911	2.39381	0.0166745	0.120619
Calr	13209.7	-0.0245222	0.063006	-0.389204	0.697125	0.870756
H3f3b	13075.7	0.0383224	0.0573719	0.667966	0.504156	0.769297
Nop56	13132.1	0.101543	0.0674661	1.5051	0.132298	0.395784
Prpf8	12889.6	0.182418	0.0806796	2.26101	0.0237584	0.150268
Slc25a3	13003.6	0.02908	0.055158	0.527214	0.598045	0.821074
Rpl36	13485.3	-0.0877131	0.090849	-0.965482	0.334303	0.642337
Cct7	13105.1	0.0487697	0.0414353	1.17701	0.239193	0.541756
Fau	13054.8	-0.0870673	0.0562316	-1.54837	0.121533	0.377934
Cct6a	12664.1	0.177439	0.0577322	3.07349	0.00211573	0.0318436
Anp32b	13147.7	-0.0121688	0.0597515	-0.203657	0.838622	0.936717
Arhgdia	13035	-0.133685	0.0470642	-2.84047	0.00450465	0.0521955
Il2ra	12746.6	-0.0776156	0.17217	-0.450808	0.652128	0.850858
Shmt2	12838	-0.0708538	0.0557665	-1.27054	0.203891	0.499732
Hnrnpf	12624.3	0.0773904	0.0516638	1.49796	0.134143	0.399208
Bzw1	12270.8	0.102506	0.0528079	1.94111	0.0522446	0.235864
Ubb	12648.2	-0.115468	0.048554	-2.37813	0.0174007	0.123543
Hnrnpa0	12628.4	-0.179254	0.0668742	-2.68046	0.00735206	0.0717521
Rps27	12628.4	0.0647436	0.129164	0.50125	0.616195	0.829273
Hnrnpl	12335.5	-0.133799	0.0312498	-4.28159	1.85566e-05	0.00121681
Rpl35	12347.5	-0.149478	0.122311	-1.22211	0.221665	0.521633
Cct4	11993.8	0.132701	0.0379247	3.49906	0.000466901	0.0116987
mt-Nd6	11514.1	0.159218	0.083982	1.89586	0.057979	0.249147
Cct3	12025.6	0.123337	0.0464191	2.65703	0.00788322	0.0751597
Nfkb1	11651	0.099853	0.0672162	1.48555	0.137398	0.405148
Rrm1	11737.9	0.116455	0.0585281	1.98973	0.0466205	0.221095
Ssrp1	11914.4	0.0239191	0.0452075	0.529095	0.596739	0.820461
Eif3b	11968.8	-0.0244813	0.0523405	-0.467732	0.639976	0.84469
Hnrnph1	11789.4	0.153336	0.0591695	2.59147	0.00955663	0.0848693
Btf3	11896.5	0.0330669	0.0580831	0.569304	0.56915	0.802731
Mcm6	11890.4	-0.127761	0.051082	-2.5011	0.0123807	0.101002
Uba1	11757.1	0.130865	0.0584502	2.23892	0.0251613	0.155587
Ybx3	11692.6	-0.146626	0.0646213	-2.26901	0.0232679	0.148004
Tardbp	11558.9	0.132691	0.0565655	2.34579	0.0189866	0.130497
Atp1a1	11471.7	-0.0195598	0.0875684	-0.223365	0.823251	0.929594
Rpl23a	12109.1	0.126245	0.113571	1.1116	0.266311	0.571386
Mcm3	11585.9	-0.127481	0.0507598	-2.51145	0.0120236	0.0993716
Dnmt1	11456.6	-0.0212733	0.0696194	-0.305565	0.759936	0.900272
Canx	11468.8	-0.0785556	0.0598639	-1.31224	0.18944	0.480371
H2afz	11507.8	0.0142492	0.0968987	0.147052	0.883091	0.955935
Chd4	11271.8	-0.0161132	0.0716062	-0.225026	0.821959	0.928935
Ddb1	11162.4	0.133964	0.0597485	2.24213	0.0249527	0.154834
mt-Rnr1	11129.6	-0.25313	0.270498	-0.935793	0.34938	0.65426
Tkt	11257.2	-0.16287	0.040882	-3.9839	6.77923e-05	0.0030572
Etf1	10981.1	0.0791512	0.0482191	1.64149	0.100695	0.341044
Ywhaz	10931.2	0.00704054	0.057035	0.123443	0.901757	0.96408
Rpl22	10833.5	-0.147704	0.138798	-1.06417	0.287253	0.595874
Ywhae	10779.3	0.0520967	0.0512974	1.01558	0.309829	0.619018
Phgdh	11097.5	0.141884	0.0544297	2.60673	0.00914106	0.082231
Pcbp1	11032.2	-0.184404	0.0593148	-3.1089	0.00187786	0.0293184
Msn	10769.2	0.0753144	0.0590123	1.27625	0.201868	0.497001
Son	10561.8	0.14232	0.056075	2.53802	0.0111481	0.0945901
Rbm3	10796.3	0.133293	0.117049	1.13877	0.254797	0.558335
Eif4a2	10522.2	0.285509	0.0607709	4.69812	2.62571e-06	0.00031228
Sf3b1	10523.2	0.0916312	0.0393312	2.32973	0.0198204	0.133572
Mbnl1	10047.6	0.272363	0.0612204	4.44889	8.63158e-06	0.000707498
Hnrnpm	10738.9	0.000622246	0.0449849	0.0138323	0.988964	0.996095
Larp1	10653.4	-0.0255564	0.066028	-0.387053	0.698717	0.871672
Psat1	10652.6	0.209657	0.0613535	3.41719	0.000632714	0.0142677
Eif5	10269.7	0.0106187	0.0516835	0.205456	0.837216	0.936264
Actr2	10406	0.00709748	0.0522902	0.135733	0.892033	0.960523
AI506816	10415.5	0.0143377	0.0616903	0.232413	0.816217	0.926186
Hspa4	10423	0.0147464	0.0402532	0.36634	0.714111	0.879034
Nono	10495.2	0.176564	0.0546814	3.22896	0.00124241	0.0222624
Hsp90b1	10302.1	-0.0980934	0.0622522	-1.57574	0.115085	0.367395
Cad	10198	-0.0938569	0.0825374	-1.13714	0.255478	0.558933
Rpl36a	10465.8	-0.1437	0.184748	-0.777812	0.43668	0.723683
Xpo1	10036.1	0.00463241	0.0579095	0.079994	0.936242	0.977036
Prdx1	10218.9	-0.0617869	0.106126	-0.582204	0.560429	0.799643
Sfpq	10233.2	-0.198697	0.055447	-3.58354	0.000338966	0.00928217
Ly6a	10500.4	-0.311618	0.115637	-2.6948	0.00704305	0.0700273
Prrc2a	10208.3	-0.0643335	0.0718489	-0.895401	0.370573	0.674129
Nolc1	10172.3	0.125728	0.0737635	1.70447	0.0882928	0.317325
Hdgf	10223.4	-0.011787	0.0563972	-0.209	0.834448	0.935035
Snx5	9851.73	0.0291908	0.0446985	0.65306	0.513718	0.773478
Rps29	10508.7	0.0975512	0.106143	0.919051	0.358069	0.662155
Nop58	9873.45	0.14495	0.058232	2.48918	0.012804	0.103481
Pdia3	9848.07	-0.162347	0.0424889	-3.82093	0.000132951	0.00488736
Tmsb10	10329.5	-0.225493	0.0857969	-2.62821	0.00858345	0.0796069
Sf3b3	9750.07	0.219375	0.0678066	3.2353	0.00121515	0.0220015
Dhx9	9668.37	0.118693	0.0526258	2.25541	0.0241077	0.151528
Tfdp1	9636.08	0.103437	0.0459333	2.2519	0.0243287	0.152523
Rpl39	9873.96	0.0630606	0.120588	0.522943	0.601014	0.822328
Eprs	9739.08	0.209128	0.07124	2.93554	0.00332965	0.0426169
Mcm5	9811.82	-0.0343033	0.0452239	-0.758521	0.448139	0.732658
Cdv3	9689.65	-0.0544838	0.0542474	-1.00436	0.315207	0.623603
Eif1	9538.22	-0.112279	0.0695762	-1.61376	0.10658	0.35191
Uhrf1	9687.54	-0.249349	0.0648499	-3.84501	0.000120548	0.00452802
Hnrnpc	9666.63	0.0588739	0.0474105	1.24179	0.214313	0.512283
Vars	9754.48	-0.247081	0.0543255	-4.54816	5.41165e-06	0.00053915
Mcm7	9704.35	-0.0844254	0.0472881	-1.78534	0.0742062	0.286869
Smc4	9383.05	0.185617	0.0633335	2.93078	0.00338107	0.0430838
Pfkp	9795.68	-0.0786332	0.110692	-0.710378	0.47747	0.753113
Hspe1	9420.86	0.0857804	0.0849354	1.00995	0.31252	0.620893
Rpl37	9534.61	0.00921394	0.0916227	0.100564	0.919897	0.971131
Srsf2	9316.24	0.00307019	0.0420048	0.0730914	0.941733	0.978432
CT010467.1	9891.45	0.106581	0.229243	0.464925	0.641985	0.846237
Trim28	9445.56	-0.165115	0.0513025	-3.21846	0.00128882	0.0226918
Rpl30	9512.19	0.241227	0.439291	0.549128	0.582918	0.810994
Slc1a5	9544.1	0.0317308	0.0493402	0.643102	0.520158	0.777673
Ipo7	9228.83	0.149052	0.0491626	3.03181	0.0024309	0.0347341
P4hb	9432.98	-0.222383	0.061596	-3.61035	0.000305787	0.00870776
Ube2d3	9198.8	-0.000616881	0.0313489	-0.0196779	0.9843	0.994313
Srsf6	9114.82	-0.0470112	0.0658221	-0.714216	0.475094	0.751318
Eif3e	9078.06	-0.0623023	0.126841	-0.491185	0.623296	0.834181
Sept7	8947.79	0.2607	0.100763	2.58726	0.00967424	0.0853372
Pabpc4	9233.13	0.027123	0.0572356	0.473883	0.635583	0.842283
Anapc5	9127.25	-0.012612	0.0416327	-0.302935	0.761939	0.900798
Rpl17	9250.41	-0.112669	0.328216	-0.343277	0.73139	0.88764
Nsun2	8980.06	0.00261443	0.0360804	0.0724612	0.942235	0.978534
Agfg1	8769.76	0.24254	0.0747186	3.24605	0.00117018	0.021541
Gpi1	9206.34	-0.285067	0.0826516	-3.44902	0.000562618	0.0132627
Abce1	8763.37	0.112255	0.0519997	2.15876	0.0308691	0.174988
Eif2s2	8932.55	0.171399	0.0867718	1.97529	0.0482353	0.225663
Rps21	9120.9	0.0911799	0.125256	0.727946	0.466647	0.744426
Vcp	8890.81	-0.127979	0.0663569	-1.92865	0.0537741	0.240086
Rap1b	8625.69	0.0191429	0.0427572	0.447712	0.654361	0.851905
Slfn2	8918.24	0.118572	0.113827	1.04169	0.297556	0.607685
Itgal	8566.9	0.436238	0.10722	4.0686	4.7296e-05	0.0023615
Huwe1	8588.73	0.0925722	0.0707371	1.30868	0.190643	0.482314
Rsl1d1	8644.02	0.155026	0.0570547	2.71714	0.00658481	0.0671828
Hdlbp	8645.74	0.0128352	0.0782716	0.163983	0.869745	0.95084
Rbm39	8548.36	-0.0169147	0.0464249	-0.364346	0.715599	0.879438
Cd53	8499.65	-0.209502	0.0944484	-2.21816	0.0265437	0.160207
Paics	8580.71	0.0535838	0.0464621	1.15328	0.248795	0.551387
Irf8	8495.72	0.00790191	0.112769	0.0700718	0.944137	0.979419
Mat2a	8405.05	0.248389	0.0523356	4.74609	2.07389e-06	0.000249477
Gars	8541.45	0.0787143	0.052185	1.50837	0.13146	0.3949
Kpna2	8208.8	0.224624	0.0849666	2.64368	0.00820104	0.0772466
Psme3	8239	0.0540701	0.0531681	1.01697	0.30917	0.618825
Fkbp4	8481.65	0.0379878	0.0499185	0.760996	0.44666	0.731726
Tmpo	8217.49	-0.0190645	0.03403	-0.560227	0.575325	0.805845
Syncrip	8141.81	0.127252	0.0522656	2.43472	0.0149034	0.112855
Cdc42	8156.83	0.0548434	0.0542795	1.01039	0.31231	0.620781
Psmd2	8261.89	0.121938	0.0480427	2.53812	0.0111449	0.0945901
Pgam1	8343.21	-0.317188	0.0834496	-3.80095	0.00014414	0.00509786
Acly	8281.01	-0.0603687	0.0561088	-1.07592	0.281962	0.59096
Ddx39b	8296.32	0.0874866	0.0440804	1.9847	0.0471774	0.222688
Rpl35a	8324.01	-0.0370328	0.119201	-0.310675	0.756048	0.89909
Stip1	8283.14	-0.0870214	0.0478399	-1.81901	0.0689098	0.275798
Rac2	8102.75	0.204338	0.0598407	3.4147	0.000638532	0.0143445
Shisa5	8321.43	-0.32428	0.0650735	-4.98329	6.25114e-07	9.24788e-05
Eif4h	8192.34	-0.103598	0.0549056	-1.88683	0.0591826	0.252353
Fus	8169.63	-0.034066	0.0685	-0.497313	0.618968	0.831436
Rpl38	8404.32	-0.0602608	0.140515	-0.428857	0.668027	0.858094
Ewsr1	8244.18	0.0475307	0.0538305	0.88297	0.377252	0.678193
Prmt1	8020.5	0.088792	0.0457485	1.94087	0.0522735	0.235864
Atf4	8415.48	0.0397587	0.0730428	0.544321	0.586221	0.812829
Nars	8196.75	0.208562	0.0666973	3.12699	0.00176607	0.0280421
Cdk4	8058.29	-0.000640011	0.0426839	-0.0149942	0.988037	0.995895
Tagln2	8012.2	-0.042598	0.0578912	-0.735829	0.461835	0.742888
Ivns1abp	7805.7	0.115675	0.0586999	1.97061	0.048768	0.227191
Cd6	7971.59	-0.00489405	0.109454	-0.0447131	0.964336	0.986499
Mcm4	7935.7	-0.0288119	0.0567227	-0.507943	0.611494	0.82711
Srm	7891.33	-0.0299794	0.0652571	-0.459404	0.645944	0.847771
Prrc2c	7849.09	0.131504	0.0935109	1.4063	0.159636	0.43833
Trbc2	7869.12	-0.0336318	0.0873859	-0.384866	0.700337	0.872268
Il2rb	7792.99	0.0614452	0.108384	0.566922	0.570767	0.803525
Slc7a5	7856.94	0.108132	0.0768541	1.40698	0.159432	0.438068
Oaz1	7907.52	-0.0957008	0.0830881	-1.1518	0.249404	0.552456
Hcfc1	7684.06	0.122692	0.0782717	1.56751	0.116995	0.370469
Tap1	7898.36	-0.271849	0.0472811	-5.74964	8.94336e-09	3.09977e-06
Eif3l	7819.78	0.160512	0.0505973	3.17235	0.00151209	0.0251714
Igtp	7815.18	-0.203619	0.0587808	-3.46403	0.000532141	0.0127326
Thrap3	7621.42	0.0834525	0.0618918	1.34836	0.177542	0.463873
Rbbp7	7541.26	0.000372459	0.0377381	0.00986957	0.992125	0.99728
Sf1	7736.94	-0.12243	0.0466057	-2.62694	0.00861562	0.0797779
Gas5	7640.12	0.290134	0.0868365	3.34115	0.000834327	0.0173006
Ptp4a2	7427.53	-0.0233571	0.0423305	-0.551779	0.5811	0.809615
Tnpo1	7384.04	0.210142	0.0617144	3.40508	0.000661445	0.0146691
Rps12-ps3	7521.74	-0.191708	0.190036	-1.0088	0.313069	0.62168
Nup210	7506.46	-0.205339	0.05206	-3.94428	8.0041e-05	0.00345544
Fbl	7617.94	-0.0377491	0.0489406	-0.771324	0.440515	0.726726
Tubb4b	7424.17	-0.137747	0.0581657	-2.36818	0.0178757	0.125821
Cap1	7345.78	0.0630341	0.0571938	1.10211	0.270412	0.576556
Dhx15	7296.79	0.0724271	0.0456224	1.58753	0.112392	0.362132
Anp32e	7342.7	0.124704	0.0554862	2.24748	0.0246094	0.153974
Mcm2	7363.97	-0.0768922	0.0434824	-1.76835	0.0770022	0.293285
Flna	7288.33	0.136579	0.0876538	1.55816	0.119196	0.373827
Arf1	7458.94	0.0447098	0.0474864	0.94153	0.346434	0.651301
Rpl7a	7422.72	0.00273299	0.117031	0.0233526	0.981369	0.994075
Srsf7	7330.09	0.207663	0.07307	2.84197	0.00448356	0.0521955
Eef1d	7407.75	0.0269737	0.049227	0.547946	0.583729	0.811508
Kars	7425.6	0.0157367	0.0525166	0.299653	0.764442	0.902174
Srebf2	7443.8	-0.261379	0.0590806	-4.42412	9.68365e-06	0.000764219
Fam120a	7162.61	0.0247737	0.0590957	0.419214	0.67506	0.8612
Cnot1	7221.62	0.157322	0.0833296	1.88794	0.0590335	0.252072
Dek	7224.94	-0.18086	0.0473163	-3.82235	0.000132187	0.00487404
Srgn	7151.42	-0.0999559	0.100454	-0.995041	0.319716	0.627702
Nucks1	7226.92	0.0686291	0.0510242	1.34503	0.178615	0.465874
Cbx5	7329.57	0.0802794	0.0490421	1.63695	0.101641	0.342789
Snrnp200	7173.3	0.172214	0.0807334	2.13312	0.0329152	0.181086
U2af2	7366.32	-0.0304958	0.0503378	-0.605823	0.544632	0.790303
C1qbp	7349.98	-0.102086	0.0544548	-1.87469	0.0608358	0.255996
Smarca5	7168.96	-0.0472534	0.0489201	-0.96593	0.334079	0.642269
Arpc2	7149.08	0.0149206	0.0395161	0.377582	0.705741	0.875035
Bclaf1	7170.8	0.116239	0.0604176	1.92393	0.0543634	0.240863
Csde1	7103.04	0.0300534	0.0413944	0.726026	0.467823	0.74516
Gspt1	7095.28	0.0365377	0.0494686	0.738603	0.460148	0.742174
Tln1	7061.21	0.10589	0.0801973	1.32037	0.186712	0.476742
Wdr43	7061.32	0.188731	0.0477853	3.94957	7.82926e-05	0.00339203
Smc1a	7144.43	0.127681	0.0552281	2.31189	0.0207839	0.137325
Rab8b	6897.47	0.208519	0.0853864	2.44207	0.0146034	0.111824
Lck	7148.31	-0.0257628	0.0576773	-0.44667	0.655113	0.852191
Noc2l	7093.9	0.131173	0.0464175	2.82595	0.00471413	0.0537978
Ikzf1	7046.98	-0.00833064	0.0712766	-0.116878	0.906957	0.965537
Prkar1a	6942.03	0.0328356	0.0439044	0.747889	0.454527	0.737938
Cd5	6940.05	0.0584618	0.122995	0.47532	0.634559	0.841385
Sf3b2	7121.5	-0.0144235	0.0455189	-0.316868	0.751343	0.897381
Ahcy	7007.18	-0.0159214	0.0548956	-0.29003	0.771794	0.904983
Satb1	7070.78	-0.594303	0.246833	-2.40772	0.0160526	0.117878
Chchd2	7152.8	-0.233308	0.0964504	-2.41894	0.0155657	0.116058
Topbp1	6877.24	0.0759694	0.0496623	1.52972	0.126086	0.385957
Matr3	6914.98	-0.00705854	0.0787449	-0.089638	0.928575	0.974958
Phb2	7010.73	-0.0767505	0.0558221	-1.37491	0.169159	0.452794
Eif3h	6986.74	-0.0539374	0.0452848	-1.19107	0.233626	0.535852
Atp2a2	6810.02	0.108107	0.0688154	1.57097	0.11619	0.369173
Ppp1ca	6997.38	-0.150072	0.0444153	-3.37884	0.000727916	0.0156785
Eif2s1	6846.37	0.0806582	0.0680662	1.185	0.236019	0.538388
Hnrnpdl	6945.83	0.0348918	0.0742627	0.469843	0.638467	0.844352
Csnk1a1	6787.61	-0.076117	0.0397846	-1.91323	0.0557188	0.244078
Txn1	6917.03	0.0784717	0.06968	1.12617	0.260093	0.56425
Aebp2	6685.08	0.0436756	0.0467015	0.935207	0.349682	0.65426
Arhgef1	6865.72	-0.0960867	0.0607561	-1.58152	0.11376	0.36499
Actn4	6716	-0.00136518	0.0578191	-0.0236112	0.981163	0.994075
Psme1	6795.59	-0.092652	0.0464107	-1.99635	0.0458958	0.219295
Ccdc50	6557.67	0.326	0.110317	2.95513	0.00312538	0.0410324
Snu13	6741.96	0.194268	0.0696365	2.78975	0.00527485	0.0578564
Lcp2	6500.42	0.252454	0.113191	2.23034	0.0257252	0.157533
Eif3i	6693.38	0.0241176	0.0495045	0.48718	0.626131	0.835562
Cltc	6574.9	0.0638886	0.0547754	1.16637	0.243463	0.545622
Myc	6659.23	-0.298977	0.0461605	-6.4769	9.36266e-11	7.19229e-08
Baz1b	6661.54	-0.0395349	0.0564417	-0.700456	0.483642	0.756807
Tomm70a	6604.23	0.109766	0.0440787	2.49023	0.0127661	0.103244
2610507B11Rik	6614.74	-0.0272036	0.0700852	-0.388151	0.697904	0.871195
Snrpb	6715.53	-0.0326026	0.0490428	-0.664779	0.506192	0.769827
Iars	6524.64	0.215473	0.06439	3.34638	0.000818742	0.0171837
Nup205	6494.56	0.194556	0.0644753	3.01753	0.00254841	0.0358641
Nasp	6659.83	-0.0160798	0.0682671	-0.235542	0.813788	0.925267
Tcof1	6644.83	-0.118856	0.0726532	-1.63594	0.101852	0.343308
Ucp2	6592.22	-0.0711251	0.0735626	-0.966865	0.333612	0.641878
Naa50	6500.99	-0.0529602	0.0454258	-1.16586	0.243671	0.545785
Usp1	6538.04	-0.0472917	0.0422974	-1.11808	0.263535	0.567941
Rbbp4	6476.11	-0.0134554	0.0462583	-0.290877	0.771146	0.904562
Gm10275	6726.06	-0.0178478	0.10764	-0.16581	0.868306	0.950584
Mcl1	6591.45	-0.040448	0.0481	-0.840913	0.400396	0.699063
Rrm2	6453.92	-0.0726793	0.0619406	-1.17337	0.240647	0.542922
Cse1l	6381.65	0.151337	0.0627089	2.41332	0.0158081	0.11686
Eif3m	6477.02	-0.0608107	0.121103	-0.502141	0.615569	0.828992
Mknk2	6583.98	-0.263875	0.0710892	-3.71189	0.000205717	0.00648195
Ddx39	6550.64	0.0285586	0.0556898	0.512815	0.608081	0.825827
Psma7	6541.12	-0.160388	0.0911544	-1.75952	0.0784898	0.296993
Ssb	6489.08	0.069663	0.0716435	0.972356	0.330873	0.639198
Eif4a-ps4	6482.16	0.16035	0.0907468	1.76701	0.077227	0.293773
Gart	6380.32	0.143959	0.0659845	2.18171	0.0291307	0.168791
Slc7a1	6477.77	0.181414	0.0808963	2.24255	0.0249261	0.154828
Tra2b	6408.12	0.0751063	0.0535681	1.40207	0.160894	0.439893
Bsg	6464.49	-0.217695	0.0710156	-3.06546	0.00217336	0.0323498
Pik3cd	6368.41	-0.129121	0.0772653	-1.67114	0.0946945	0.330003
Itk	6302.22	-0.0750757	0.0933673	-0.80409	0.421345	0.712481
Pcbp2	6361.29	-0.141284	0.0473178	-2.98586	0.00282786	0.0380741
Mdh2	6315.95	0.0214438	0.051486	0.416497	0.677046	0.861713
Cyfip2	6311.84	-0.176954	0.0859522	-2.05875	0.0395182	0.200862
Malat1	6351.7	0.326222	0.110723	2.94629	0.00321611	0.0417715
Ghitm	6348.51	-0.0354605	0.0770802	-0.460047	0.645482	0.847756
Sub1	6311.92	-0.0145452	0.0883701	-0.164594	0.869263	0.950837
Maz	6424.89	-0.0743218	0.041264	-1.80113	0.0716823	0.28169
Fkbp1a	6329.58	-0.031561	0.055704	-0.566584	0.570997	0.803654
Mthfd2	6295.36	0.293043	0.0785694	3.72974	0.000191677	0.00611903
Tpr	6195.74	-0.045465	0.0491878	-0.924315	0.355322	0.659488
Supt16	6241.6	0.183929	0.0784627	2.34416	0.0190701	0.130613
Gdi2	6178.58	-0.0909857	0.0598944	-1.5191	0.128736	0.390425
Ranbp2	6134.27	0.101531	0.0558044	1.81941	0.0688489	0.275695
Rbpj	6111.17	0.0987936	0.192324	0.513684	0.607473	0.825628
Eftud2	6230.44	-0.00758644	0.0553365	-0.137096	0.890955	0.959958
Atp5f1	6316.32	0.0373091	0.0704052	0.529919	0.596168	0.820091
Heatr1	6131.39	0.240601	0.0694113	3.46632	0.000527644	0.0126905
Fubp1	6293.89	0.120831	0.0601648	2.00833	0.0446078	0.21642
Gnl3	6148.67	0.234342	0.0524753	4.46575	7.97885e-06	0.00068163
Wdr1	6107.88	0.131753	0.0616191	2.13818	0.0325021	0.180075
Uba2	6156.56	0.14716	0.0375848	3.91541	9.02498e-05	0.00378831
Ptpn6	6191.37	0.134482	0.061559	2.1846	0.028918	0.16831
Hdac7	6161.29	0.233126	0.10937	2.13153	0.0330454	0.181361
Cs	6170.81	-0.0359162	0.0583839	-0.615174	0.53844	0.787617
Aars	6235.32	0.0924348	0.0700255	1.32002	0.18683	0.476742
Snrnp70	6246.85	-0.0535616	0.0536959	-0.997498	0.318523	0.626764
Srsf11	5975.49	0.0170066	0.0389084	0.437093	0.662044	0.854116
Thy1	5987.42	0.0024935	0.121824	0.020468	0.98367	0.994313
Srsf10	6012.09	0.0164282	0.0482876	0.340215	0.733695	0.888761
Dkc1	6020.14	0.0984151	0.0561994	1.75118	0.0799155	0.300141
Rpl17-ps3	5807.39	-0.0797283	0.125194	-0.636839	0.52423	0.780145
Capzb	6050.44	-0.0480105	0.0363699	-1.32006	0.186815	0.476742
Ddx6	6076.44	0.0655086	0.0685088	0.956207	0.338968	0.646544
Nfkb2	5999.25	0.000519122	0.0903125	0.00574807	0.995414	0.998143
Copa	5980.08	0.185334	0.0548715	3.3776	0.000731208	0.0156996
Cacybp	5959.86	-0.0263994	0.0815831	-0.323589	0.746249	0.895211
Suz12	5955.01	-0.0290561	0.0365509	-0.794948	0.426644	0.717563
Limd2	6114.69	-0.133637	0.0759453	-1.75965	0.0784675	0.296993
Anp32a	6230.45	0.097726	0.0612155	1.59643	0.110394	0.358935
Mlec	5983.11	0.0694479	0.0449406	1.54533	0.122268	0.379052
Mdn1	5923.74	0.307992	0.0851636	3.61648	0.000298637	0.00858476
Pds5a	5874.85	0.128786	0.0501551	2.56776	0.0102358	0.0891001
Impdh2	6037.44	-0.141374	0.0440175	-3.21177	0.00131919	0.0230791
Papola	5879.17	0.0542189	0.0366127	1.48088	0.138639	0.407322
Khsrp	6083.27	-0.143527	0.0524877	-2.7345	0.0062476	0.0651113
Gm42047	5677.38	0.0266352	0.379488	0.0701873	0.944045	0.979419
Slc38a1	5935.96	0.120668	0.0847057	1.42456	0.154284	0.430456
Brd2	6036.91	-0.0898086	0.041583	-2.15974	0.0307926	0.174914
Rpl21	6104.5	0.216234	0.268345	0.805805	0.420355	0.711692
Eif3f	6028.9	-0.296569	0.0480832	-6.16784	6.92272e-10	3.49915e-07
Pclaf	5913.58	0.101466	0.0416402	2.43673	0.0148207	0.11246
Lig1	6036.82	-0.14901	0.0494984	-3.01039	0.0026091	0.0364315
Rad23b	6014.03	-0.0622934	0.0613599	-1.01521	0.310004	0.619243
Ifi47	6102.6	-0.246085	0.0755332	-3.25797	0.00112211	0.0208457
Ppp1cc	5974.03	-0.0976825	0.0452267	-2.15984	0.0307849	0.174914
Atxn2l	6094.84	-0.0628009	0.0647382	-0.970074	0.33201	0.640116
Strap	5845.46	-0.0507259	0.0518245	-0.978801	0.327678	0.636112
Rangap1	5939.34	-0.0896294	0.0676686	-1.32453	0.185325	0.47552
Arpc1b	6039.1	-0.111511	0.0511748	-2.17901	0.0293307	0.169595
Pum2	5777.73	0.12372	0.049211	2.51407	0.0119345	0.0989621
Capza1	5817.88	0.156308	0.0543519	2.87585	0.00402944	0.0483493
Lmnb1	5922.41	-0.0731053	0.0525796	-1.39037	0.164416	0.446203
Macf1	5765.41	0.175347	0.0826618	2.12125	0.0339005	0.183674
Hnrnpul1	5966.82	0.0032449	0.060033	0.0540519	0.956894	0.984403
Polr2a	5850.34	-0.0694382	0.0891005	-0.779324	0.435789	0.723556
Ezh2	5858.4	-0.075894	0.0412907	-1.83804	0.0660564	0.269697
Iqgap1	5747.48	0.0302791	0.0766316	0.395126	0.69275	0.869593
Hif1a	5902.29	-0.205581	0.126848	-1.62069	0.105083	0.349195
Hnrnpul2	5898.71	-0.108941	0.0604916	-1.80092	0.0717154	0.281729
Atad2	5728.85	0.0847693	0.079459	1.06683	0.286048	0.594517
Zfp207	5768.78	0.0649005	0.059864	1.08413	0.278306	0.585626
Rps28	6116.48	0.0336602	0.0940726	0.357811	0.720485	0.882403
Btla	5661.69	0.229898	0.0975779	2.35604	0.0184708	0.128456
Ncapd2	5806.28	0.0277176	0.101837	0.272177	0.785486	0.911491
Atic	5778.1	0.121456	0.0630703	1.92573	0.0541379	0.240391
Gls	5656.75	0.14156	0.0531895	2.66143	0.00778097	0.0744995
Ly6e	5712.71	0.00783901	0.0978818	0.0800865	0.936168	0.977036
Hnrnpd	5802.84	-0.140346	0.0541803	-2.59035	0.00958781	0.0848976
Ppm1g	5779.43	-0.0253926	0.048259	-0.526173	0.598768	0.821485
Sept11	5698.87	0.0616828	0.0593647	1.03905	0.298783	0.608047
Hmgn2	5621.26	-0.125172	0.0762444	-1.64173	0.100647	0.341044
Phb	5766.28	0.00783145	0.0759042	0.103175	0.917824	0.970308
Gm6136	5716.62	0.0576985	0.10409	0.554313	0.579364	0.808175
Ptges3	5675.15	-0.188254	0.06382	-2.94977	0.00318013	0.0415066
Ppp2ca	5608.34	0.0423649	0.0443907	0.954363	0.3399	0.647405
Rad21	5665.58	-0.0656853	0.0713381	-0.920762	0.357175	0.661105
Mthfd1	5681.32	0.0611766	0.0673769	0.907975	0.363891	0.668742
Hmgn1	5745.06	-0.110754	0.0673834	-1.64364	0.10025	0.340273
Cd52	5758.41	0.0190888	0.103439	0.184541	0.853589	0.943903
Metap2	5616.62	0.178048	0.0471163	3.77892	0.000157513	0.00532252
Ywhah	5665.17	-0.186688	0.0444733	-4.19777	2.69561e-05	0.00157214
Psma1	5693.36	0.0170486	0.0795386	0.214344	0.830279	0.932699
Gbp4	5687.27	-0.13699	0.0984146	-1.39197	0.163931	0.445186
Samhd1	5927.56	-0.744614	0.178624	-4.1686	3.06477e-05	0.00172924
Psma4	5679.86	-0.0417351	0.102468	-0.4073	0.683788	0.864581
Rbm25	5617.56	-0.0369015	0.0484731	-0.761277	0.446491	0.731549
Ccng1	5214.18	-0.0823333	0.186953	-0.440396	0.65965	0.853262
Rrp1	5631.73	0.0556772	0.0592282	0.940045	0.347195	0.652139
Nup153	5479.19	0.211376	0.0612801	3.44933	0.000561971	0.0132627
Rgs1	5255.3	0.0328702	0.212795	0.154469	0.87724	0.95402
Ppid	5552.1	0.259458	0.0506135	5.12627	2.95546e-07	4.91133e-05
Grk2	5591.14	-0.0885662	0.0658344	-1.34529	0.178532	0.465757
Dnaja1	5695.07	0.0451595	0.0627836	0.719287	0.471964	0.748222
Wnk1	5492.7	0.0538562	0.0666553	0.80798	0.419102	0.710876
Lrmp	5468.49	0.23694	0.123565	1.91753	0.055171	0.242932
Morf4l2	5603.04	0.0461453	0.07104	0.649569	0.515971	0.775522
Prpf19	5551.37	0.0324542	0.0443423	0.731902	0.464229	0.74305
Sars	5681.52	0.130744	0.0669616	1.95252	0.0508769	0.23255
Gm9794	5639.59	0.0241627	0.086149	0.280476	0.779113	0.909398
Trbc1	5470.64	0.0647637	0.107914	0.600144	0.54841	0.792656
Adss	5563.44	0.00854652	0.0692026	0.1235	0.901711	0.96408
Hells	5413.2	0.0365064	0.0613785	0.594774	0.551994	0.794598
M6pr	5517.13	0.0634321	0.0539756	1.1752	0.239915	0.542481
Gm6472	5642.97	-0.21078	0.196991	-1.07	0.28462	0.593863
Clic4	5681.06	-0.113471	0.185415	-0.611986	0.540547	0.788374
Eif4enif1	5532.89	-0.104554	0.0758574	-1.3783	0.168111	0.451286
Nhp2	5626.81	0.0278179	0.0810456	0.343238	0.73142	0.88764
Itgb1	5307.09	0.235501	0.0936366	2.51505	0.0119014	0.0989621
Mta2	5518.53	-0.0648488	0.0535595	-1.21078	0.22598	0.527876
Srsf5	5574.8	0.0825091	0.0674111	1.22397	0.220964	0.520845
Dut	5480.13	-0.107555	0.0573059	-1.87686	0.0605376	0.255437
Rpa1	5464.4	-0.0140453	0.0474617	-0.295929	0.767284	0.903139
Pfas	5463.5	0.168746	0.0714512	2.36169	0.0181918	0.127269
Rps10-ps2	5562.04	-0.150917	0.0949815	-1.58891	0.112081	0.361514
Tpm4	5456.72	0.0257653	0.0657664	0.39177	0.695228	0.87029
Ablim1	5478.74	-0.170553	0.0966402	-1.76482	0.0775939	0.294799
Ubr4	5391.46	-0.0710775	0.0835811	-0.850402	0.395102	0.693908
Vdac2	5335.14	0.0956942	0.0547812	1.74684	0.0806646	0.301919
Psma2	5469.96	0.0733817	0.0753712	0.973604	0.330253	0.638602
Ide	5380.68	-0.129667	0.191229	-0.678071	0.497726	0.765553
Naa15	5278.18	0.118889	0.0391666	3.03548	0.00240157	0.0343981
Api5	5335.4	0.0971581	0.0423192	2.29584	0.0216849	0.141241
Psmb4	5466.3	-0.0128546	0.056425	-0.227818	0.819788	0.928123
Eif2s3x	5350.51	0.23284	0.0724361	3.21442	0.00130709	0.0229137
Nampt	5512.6	-0.291085	0.0730436	-3.98509	6.74542e-05	0.00305331
Ftsj3	5466.02	0.208092	0.0719579	2.89186	0.0038297	0.0468328
Acin1	5459.53	0.0166071	0.0436542	0.380424	0.70363	0.873912
Pdia6	5434.27	-0.04578	0.0568365	-0.805469	0.420549	0.711829
Myl6	5534.17	-0.093588	0.115917	-0.807369	0.419454	0.711101
Ube2i	5350.31	-0.0418178	0.0411475	-1.01629	0.309491	0.618825
Prelid1	5369.51	-0.327235	0.0878901	-3.72322	0.000196695	0.00623003
Serpinb9	5114.22	0.10225	0.137666	0.742735	0.457642	0.740791
Ptprcap	5404.19	0.0210458	0.0867535	0.242593	0.80832	0.923066
Vdac1	5348.23	-0.0372247	0.0423376	-0.879233	0.379275	0.679107
Ubtf	5386.9	0.0928848	0.0512167	1.81357	0.0697446	0.277972
Srrt	5324.44	-0.0507468	0.0470134	-1.07941	0.280404	0.588543
Srrm1	5257.36	-0.0839619	0.0549968	-1.52667	0.126844	0.387202
Stmn1	5376.74	-0.139959	0.0600799	-2.32954	0.0198304	0.133572
Pim2	5314.65	-0.24838	0.0607512	-4.08847	4.34219e-05	0.002232
Mogs	5390.33	-0.0729551	0.0713801	-1.02207	0.30675	0.616299
Hjurp	5338.19	-0.0786835	0.0780384	-1.00827	0.313327	0.621886
Smc2	5189.14	0.143145	0.0539318	2.65419	0.00795001	0.0756405
H2afy	5319.53	-0.136266	0.0508895	-2.67769	0.00741323	0.072117
Arhgdib	5274.77	0.0874352	0.0694866	1.2583	0.208282	0.504168
Gnb1	5241.98	-0.00231633	0.0495261	-0.0467698	0.962697	0.986191
Gnai2	5286.92	-0.137361	0.0773822	-1.7751	0.0758815	0.290417
Trip12	5231.09	0.0240155	0.0619404	0.387719	0.698224	0.871359
Ets1	5290.86	-0.0999192	0.0805975	-1.23973	0.215075	0.513093
Slc16a1	5225	-0.0225599	0.0460819	-0.489562	0.624444	0.834633
Erh	5253.74	-0.0139653	0.0596177	-0.234248	0.814792	0.925795
Celf1	5249.95	0.0407628	0.0640536	0.636386	0.524525	0.780145
Mapk1	5176.47	0.0660646	0.0524103	1.26053	0.207479	0.503337
Serinc3	5266.83	0.0238417	0.0781798	0.30496	0.760396	0.900298
Gramd1b	5130.51	0.463371	0.103672	4.46959	7.83702e-06	0.000679729
Inpp4b	5057.49	0.107091	0.118929	0.900458	0.367876	0.671952
Ubap2l	5261.33	0.109917	0.0528699	2.07901	0.0376167	0.194868
Dars	5223.05	-0.0331514	0.0694637	-0.477248	0.633186	0.840199
Birc6	5100.46	0.180004	0.0808748	2.22572	0.0260331	0.158476
Mob1a	5149.84	0.0915393	0.0587234	1.55882	0.119039	0.373563
Zfp106	5189.39	0.0972893	0.0430887	2.25789	0.0239527	0.150953
Khdrbs1	5227.58	-0.0415983	0.0476895	-0.872274	0.383059	0.6831
Arpc5	5118.52	-0.103667	0.0447831	-2.31487	0.0206202	0.136886
Rpn1	5229.93	-0.085408	0.0503465	-1.6964	0.0898093	0.319983
Junb	5368.79	-0.313948	0.106784	-2.94003	0.00328176	0.0422146
Parp1	5196.5	0.00160359	0.0602542	0.0266138	0.978768	0.992767
Csk	5219.21	-0.0334291	0.0472557	-0.707409	0.479312	0.754223
Laptm5	5068.34	-0.224079	0.060693	-3.69201	0.000222491	0.0068584
Tars	5204	0.178755	0.0597671	2.99086	0.0027819	0.0376002
Atp5g3	5327.56	-0.0680934	0.0572182	-1.19006	0.234021	0.536391
Luc7l2	5067.27	0.0895546	0.0529117	1.69253	0.0905449	0.321338
Dnaja2	5132.38	0.0276798	0.0549527	0.503702	0.614471	0.828441
Lat	5137.05	0.0436423	0.0910506	0.47932	0.631711	0.83926
Gm26917	5222.29	0.224778	0.224411	1.00163	0.316521	0.624725
Ptbp3	5063.76	0.00283138	0.042805	0.066146	0.947262	0.980742
Tmbim6	5192.9	-0.228855	0.0636506	-3.59549	0.00032378	0.00898804
Raly	5176.92	-0.187885	0.0581317	-3.23205	0.00122903	0.0221537
Jak2	5065.85	-0.0017056	0.0847619	-0.0201222	0.983946	0.994313
Anapc1	5036.41	0.115174	0.0699134	1.64738	0.0994791	0.339365
Lars	5177.58	0.21901	0.0705017	3.10645	0.00189351	0.0294186
Sdha	5132.11	0.0491941	0.0460408	1.06849	0.2853	0.594447
Zmiz2	5171.44	-0.112164	0.0724978	-1.54714	0.121829	0.378564
Nxf1	5092.83	-0.0111934	0.0352112	-0.317894	0.750565	0.897103
Abcf1	5116.26	-0.0349403	0.0477765	-0.731328	0.464579	0.743102
Hat1	5062.18	0.00894116	0.0843231	0.106035	0.915555	0.969247
Tm9sf3	5042.69	-0.0187351	0.0467358	-0.400872	0.688514	0.867058
Xpot	5039.2	0.154442	0.0577757	2.67313	0.0075148	0.0726391
Cab39	4964.22	0.171228	0.0639069	2.67933	0.00737689	0.0719365
Hmgcr	5123.81	-0.296271	0.0570333	-5.1947	2.0505e-07	3.62317e-05
Hsph1	5011.67	0.044378	0.0609738	0.727822	0.466723	0.744426
Lrrc59	5081.79	-0.0144371	0.0581146	-0.248424	0.803806	0.920511
Pold1	5118.3	-0.172903	0.0745067	-2.32063	0.0203067	0.135955
Nudc	5178.91	-0.0238058	0.0580985	-0.40975	0.68199	0.863736
Ppa1	5070.42	-0.115466	0.0582061	-1.98375	0.0472842	0.222768
Rnps1	5080.55	-0.0136966	0.0539887	-0.253695	0.799732	0.918794
St13	5015.51	0.0673066	0.0581844	1.15678	0.247362	0.549569
Cluh	5020.49	-0.00556916	0.071671	-0.0777046	0.938063	0.977297
Mars	5041.21	0.0196222	0.0469465	0.417969	0.67597	0.86154
Sptan1	4981.98	0.0759317	0.071315	1.06474	0.286995	0.595746
Cdc37	5112.01	0.0626263	0.0450701	1.38953	0.164671	0.446696
Ogt	4970.66	0.218267	0.0737324	2.96025	0.00307385	0.0404874
Sdf4	5122.83	0.0445163	0.0990836	0.44928	0.653229	0.851166
Cyp51	5113.02	-0.554602	0.0681885	-8.13337	4.17529e-16	2.53252e-12
Sh2d2a	5001.4	0.237278	0.0831772	2.85268	0.00433524	0.0509107
Atp13a3	4858.92	0.215051	0.0602369	3.57009	0.000356857	0.0096415
Kif11	4893.96	0.261781	0.100284	2.61039	0.00904398	0.0819362
Spn	4948.08	0.200924	0.108682	1.84873	0.0644974	0.265316
Dnajc2	4982.61	-0.0233084	0.0513673	-0.45376	0.650001	0.850245
Ndfip1	4973.75	-0.0971791	0.0513993	-1.89067	0.0586683	0.251131
Aco2	5000.09	0.0916304	0.0438549	2.0894	0.0366718	0.191753
Gtpbp4	4954.02	0.24834	0.0575347	4.31635	1.58632e-05	0.00108721
Stag2	4832.75	0.0200079	0.0836349	0.23923	0.810927	0.924234
Atrx	4831.94	0.121684	0.0525715	2.31464	0.0206329	0.136886
Rdx	4933.66	0.0282291	0.0590984	0.477663	0.63289	0.839999
Got2	4927.63	-0.162511	0.0532829	-3.04996	0.00228871	0.0333706
Fam49b	4917.71	-0.113724	0.0778595	-1.46063	0.144117	0.415961
Atp5c1	4866.74	0.156061	0.0560776	2.78294	0.00538685	0.0585998
Tcf25	4972.69	-0.135842	0.0468907	-2.89699	0.00376766	0.0463075
Larp4	4820.49	0.124677	0.0470795	2.64822	0.00809167	0.0764487
Acsl5	4918.5	0.0686131	0.0556839	1.23219	0.217878	0.516183
Uck2	4875.94	-0.013877	0.0495104	-0.280284	0.779259	0.909398
Ak2	4985.01	-0.0875309	0.0783055	-1.11781	0.263647	0.568082
Ddx1	4867.01	0.0748982	0.0545204	1.37377	0.169514	0.45287
Gcn1l1	4879.08	0.00406268	0.0586402	0.0692815	0.944766	0.979652
Tuba4a	4842.97	0.0196506	0.0642953	0.305631	0.759886	0.900272
Snd1	4882.32	-0.101625	0.0507408	-2.00282	0.0451961	0.217742
Ifng	4148.95	0.780316	0.482381	1.61763	0.105741	0.350383
Rpn2	4884.94	-0.054107	0.0478843	-1.12995	0.258496	0.562982
Ezr	4878.03	-0.187138	0.0466106	-4.01492	5.94654e-05	0.00278523
Dock2	4780.73	0.2118	0.0640047	3.30914	0.000935844	0.0184297
Ppp6r1	4845.87	0.00950839	0.0750406	0.12671	0.89917	0.962919
Prpf40a	4707.21	0.0994008	0.0519627	1.91293	0.0557575	0.244078
Otud4	4763.7	0.137008	0.0477081	2.87181	0.00408129	0.0486825
Ywhag	4853.19	-0.10096	0.0728965	-1.38498	0.16606	0.448561
Atp1b3	4751.18	-0.0549875	0.0432629	-1.27101	0.203725	0.499574
Mtdh	4773.71	-6.61283e-05	0.0571695	-0.00115671	0.999077	0.999489
Tomm20	4780.49	-0.0729372	0.0577773	-1.26238	0.20681	0.503013
Ctbp1	4788.52	-0.161636	0.0760877	-2.12434	0.0336414	0.182842
Rhoa	4789.96	-0.0758052	0.0471252	-1.60859	0.107706	0.354376
Cycs	4778.63	-0.0537105	0.106569	-0.503998	0.614263	0.828441
Eif5b	4797.02	0.0459804	0.0465024	0.988773	0.322774	0.631277
Nop2	4768.07	0.0999821	0.0548223	1.82375	0.0681901	0.274479
Jak1	4740.45	-0.0134797	0.0593386	-0.227167	0.820294	0.928443
Esyt1	4777.63	-0.101637	0.0701633	-1.44858	0.147455	0.420654
Arcn1	4674.58	0.103954	0.0552683	1.8809	0.0599851	0.253827
Dock10	4701.76	0.0801351	0.0845054	0.948284	0.342985	0.650326
Txnrd1	4688.7	0.029568	0.071469	0.413718	0.679081	0.862429
Calm2	4768.73	0.0537081	0.0862869	0.622436	0.533655	0.785762
Nlrc5	4731.31	0.0772682	0.05572	1.38672	0.165526	0.447778
Cox4i1	4734.95	-0.17128	0.0661771	-2.5882	0.00964777	0.0852418
Btg1	4711.7	-0.0550613	0.0653074	-0.84311	0.399167	0.698168
Slc38a2	4716.94	0.0873216	0.0614362	1.42134	0.155218	0.431339
Ogdh	4621.53	-0.0778719	0.0687171	-1.13323	0.25712	0.561181
Ubr5	4573.63	0.136292	0.0639497	2.13123	0.0330699	0.181361
Utp20	4552.31	0.221602	0.0811001	2.73245	0.00628647	0.0653431
Stt3a	4632.65	0.0870942	0.0634808	1.37198	0.17007	0.453832
Nr4a3	4523.93	0.193306	0.136948	1.41152	0.15809	0.435862
Eif4e	4622.44	0.185341	0.0671905	2.75844	0.00580785	0.0619112
Ccr7	4659.23	-0.390598	0.0933149	-4.18581	2.84153e-05	0.00162597
Mapre1	4580.67	0.0680263	0.0488662	1.39209	0.163894	0.445186
Plagl2	4660.14	-0.0148761	0.093647	-0.158853	0.873784	0.952798
Cyb5b	4706.8	-0.108664	0.0568068	-1.91286	0.0557658	0.244078
Stat3	4662.1	-0.177255	0.0907152	-1.95397	0.0507046	0.2322
Ddx17	4675.58	0.107739	0.081502	1.32192	0.186196	0.475926
Gpx1	4620.71	-0.0254008	0.0548912	-0.462748	0.643545	0.846913
Psmd8	4619.65	0.0439871	0.045632	0.963953	0.33507	0.642987
Usp7	4617.22	-0.108766	0.0638639	-1.70309	0.0885509	0.317814
Syngr2	4715.51	0.0422312	0.185181	0.228054	0.819604	0.928089
Psmd3	4655.69	-0.229475	0.0509213	-4.50646	6.59183e-06	0.000619887
Wipf1	4600.84	-0.205293	0.0821421	-2.49925	0.0124457	0.101397
Atp5d	4733.63	-0.185683	0.0428396	-4.33438	1.4617e-05	0.00104305
Dync1h1	4536.54	0.0283766	0.077568	0.365829	0.714493	0.879237
Smarcc1	4566.45	0.00530545	0.0590516	0.0898444	0.928411	0.974958
Pfkl	4735.33	-0.414659	0.0798378	-5.19377	2.06083e-07	3.62317e-05
Il4ra	4743.38	-0.618628	0.187754	-3.29489	0.000984589	0.0190102
Abcf2	4595.72	0.195074	0.0416365	4.68518	2.79714e-06	0.000326188
Irgm1	4745.13	-0.318112	0.104198	-3.05295	0.00226606	0.033236
Gimap3	4554.37	-0.123217	0.0769399	-1.60147	0.109274	0.356823
Eif1a	4520.28	0.0435428	0.075602	0.575948	0.56465	0.801424
Eif4ebp2	4546.57	-0.057497	0.0504888	-1.13881	0.254784	0.558335
Cd28	4505.57	-0.0964457	0.0707671	-1.36286	0.172926	0.457629
Hmgb1	4631.6	0.057454	0.0786477	0.730524	0.46507	0.743707
Rac1	4535.39	-0.155349	0.0534686	-2.90542	0.00366759	0.0457269
Lonp1	4642.96	-0.328652	0.0815078	-4.03215	5.5268e-05	0.00265002
Tnfrsf4	4618.42	0.152525	0.0820908	1.85801	0.0631683	0.261761
Nfx1	4531.5	0.0681344	0.0623369	1.093	0.274393	0.580614
Ebna1bp2	4557.48	0.0877327	0.0571807	1.53431	0.124954	0.384533
Srpk1	4507.19	0.0775371	0.0478471	1.62052	0.105121	0.349195
Snrpd2	4682.19	0.0422895	0.0868973	0.486661	0.626499	0.835722
Nol7	4419.04	-0.0723996	0.0805384	-0.898945	0.368682	0.672516
Taf1d	4485.5	0.219804	0.0876619	2.50741	0.0121619	0.0998777
Ago2	4420.35	0.127348	0.0778099	1.63666	0.101701	0.342895
Scaf11	4443.58	-0.121557	0.0585611	-2.07573	0.0379193	0.195828
Psmc3	4526.42	0.0385998	0.0574603	0.671765	0.501733	0.768016
Dot1l	4476.04	0.0991761	0.078709	1.26004	0.207657	0.50343
Ywhaq	4392.16	0.163127	0.0700357	2.32919	0.0198488	0.133621
Cd69	4437.89	0.0936504	0.102823	0.910792	0.362405	0.667421
Mthfd1l	4506.81	0.0374004	0.0584608	0.639751	0.522334	0.779102
Ccna2	4371.99	0.188676	0.0715173	2.63818	0.00833514	0.0778396
Fth1	4465.92	-0.343325	0.078565	-4.36995	1.24276e-05	0.000908188
Trac	4347.11	0.093734	0.0938764	0.998483	0.318045	0.626456
Stat5a	4414.12	-0.0613943	0.110611	-0.555048	0.578862	0.807963
Hprt	4441.12	-0.0310135	0.0571974	-0.542219	0.587668	0.813693
Irf1	4577.22	-0.106219	0.0692561	-1.53371	0.1251	0.384533
Trap1	4427.22	0.0714138	0.0371173	1.924	0.0543541	0.240863
Ddx27	4433.14	0.0726575	0.0563746	1.28883	0.197456	0.490891
Nsd2	4387.4	0.0360157	0.0545814	0.659854	0.509348	0.771976
Ddx18	4441.24	0.154127	0.0481445	3.20134	0.00136792	0.0237061
Iigp1	4457.94	-0.300786	0.0806714	-3.72853	0.0001926	0.00613237
Cd164	4371.43	-0.0413811	0.0758466	-0.54559	0.585348	0.812693
Stk4	4369.09	0.139476	0.0820802	1.69927	0.0892685	0.319382
Ppp1cb	4318.4	0.0217615	0.047445	0.458668	0.646473	0.848009
Cdca7	4407.76	-0.000261392	0.0807988	-0.0032351	0.997419	0.999073
Npc2	4567.28	-0.222113	0.0718016	-3.09342	0.00197861	0.0303539
Smchd1	4349.83	0.0256251	0.0522009	0.490894	0.623501	0.834236
Smarca4	4392.69	-0.106069	0.057277	-1.85186	0.0640462	0.264087
Rtcb	4455.17	0.0532845	0.0475283	1.12111	0.262241	0.56636
Rpl7l1	4407.19	0.155588	0.061938	2.512	0.0120048	0.0993716
Ganab	4389.72	0.0732911	0.0630577	1.16229	0.245119	0.54731
BC005537	4418.14	-0.163085	0.04989	-3.2689	0.00107967	0.0202177
Gimap4	4408.31	-0.0838344	0.0920316	-0.91093	0.362332	0.667394
Ywhab	4357.48	-0.0841412	0.0481571	-1.74722	0.080599	0.301919
Zap70	4357.63	0.0628133	0.0784641	0.800536	0.4234	0.714661
Mdh1	4354.14	-0.152455	0.103437	-1.47389	0.140512	0.410135
Spcs3	4278.49	0.0093115	0.0479226	0.194303	0.845939	0.94026
Ccnl2	4344.28	-0.125886	0.0586731	-2.14554	0.0319096	0.178059
Ssr3	4297.19	-0.111182	0.0729444	-1.5242	0.127459	0.3883
Rpl14-ps1	4416.24	-0.0638647	0.103409	-0.617593	0.536844	0.786813
Cnn2	4410.57	-0.177969	0.0572266	-3.10989	0.00187156	0.0292576
Ppp2r1a	4375.21	-0.133419	0.0531154	-2.51187	0.0120094	0.0993716
Hivep3	4284.05	0.298862	0.135569	2.2045	0.0274889	0.163305
Jak3	4395.48	-0.226011	0.0760732	-2.97096	0.00296871	0.0395008
Immt	4344.37	-0.0779761	0.0608611	-1.28121	0.200118	0.495234
Smg1	4237.31	0.0603829	0.0775076	0.779058	0.435946	0.723556
Calm3	4378.02	-0.0186092	0.0520424	-0.357579	0.720659	0.882438
Stt3b	4332.96	-0.0939117	0.0447538	-2.09841	0.0358692	0.189464
Uqcrc1	4306.63	-0.196424	0.0502883	-3.90596	9.38525e-05	0.00389906
Bzw2	4302.4	0.107256	0.0599891	1.78792	0.073789	0.286351
Mllt6	4394.03	-0.0230375	0.0963332	-0.239144	0.810994	0.924234
Gm8995	4211.27	-0.0495203	0.121394	-0.407929	0.683326	0.864292
Ddx46	4280.1	0.0906523	0.0543604	1.66762	0.095392	0.331832
Top1	4196.25	0.233232	0.0617642	3.77617	0.000159258	0.00535974
Bag6	4334.18	-0.17273	0.0555258	-3.11081	0.00186573	0.0292261
Nup85	4254.96	0.0576548	0.0450949	1.27852	0.201066	0.495757
Cd200	4094.54	0.545905	0.112545	4.85057	1.23109e-06	0.000165937
Tra2a	4208.31	0.0286965	0.0680144	0.421918	0.673085	0.860599
Banf1	4288.06	0.0707464	0.0643404	1.09957	0.271522	0.577292
Cd82	4331.82	-0.100208	0.0958489	-1.04547	0.295804	0.605684
Xrn2	4247.88	0.105134	0.0581273	1.80869	0.0704994	0.279578
Adsl	4199.36	0.108993	0.0586398	1.85869	0.063071	0.261757
Nisch	4247.07	-0.0207197	0.0760115	-0.272586	0.785171	0.911388
Slc3a2	4321.12	0.0109457	0.0674338	0.162317	0.871056	0.951503
Celf2	4106.52	0.203252	0.0835035	2.43405	0.0149308	0.112949
Ruvbl2	4256.83	0.0499371	0.0466636	1.07015	0.284552	0.593863
Atl3	4192.99	-0.0684932	0.0535556	-1.27892	0.200926	0.495614
Pak2	4162.96	0.048581	0.049514	0.981156	0.326516	0.634973
Psmd1	4130.5	0.0175855	0.061063	0.287989	0.773355	0.905732
Fermt3	4261.51	-0.141342	0.0679936	-2.07876	0.0376399	0.194868
Ctnnb1	4208.73	0.00404264	0.0582615	0.0693878	0.944681	0.979648
Psmc6	4196.82	-0.0381401	0.0914255	-0.417171	0.676553	0.861656
Pdcd11	4216.59	0.204672	0.0676466	3.0256	0.00248138	0.0351784
Hint1	4305.58	-0.0452214	0.0727854	-0.621298	0.534403	0.78579
Top2b	4102.31	-0.0310849	0.103552	-0.300187	0.764035	0.901956
Ncor1	4135.97	0.206647	0.0757869	2.72668	0.00639743	0.0659364
Rnf19b	4397.02	-0.389022	0.283169	-1.37382	0.169498	0.45287
Oxct1	4095.08	0.140818	0.0854264	1.64841	0.0992691	0.339242
Nsa2	4232.22	-0.012229	0.0903193	-0.135397	0.892298	0.960529
Sympk	4210.35	-0.104659	0.0630556	-1.65979	0.0969562	0.334889
Emg1	4209.48	0.167856	0.0622637	2.69588	0.00702024	0.0698626
Psmb3	4250.4	-0.0598004	0.0944403	-0.633209	0.526597	0.780948
Chtop	4186.69	0.0021015	0.0474719	0.0442683	0.964691	0.986499
Arf6	4231.51	-0.180001	0.0845045	-2.13007	0.0331657	0.181689
Cpsf6	4101.14	0.0292095	0.0368091	0.79354	0.427463	0.717824
Rtn3	4122.36	-0.0459123	0.0654743	-0.701226	0.483162	0.756289
Atp5g2	4227.18	0.0278782	0.0713695	0.390618	0.69608	0.870439
Ncbp1	4095.4	0.136911	0.0517886	2.64366	0.0082016	0.0772466
Tuba1c	4136.36	0.0597399	0.0877953	0.680445	0.496223	0.765084
Gm6793	4318.96	0.0506022	0.0671153	0.75396	0.450873	0.734858
Ranbp1	4090.88	0.0379647	0.0680658	0.557765	0.577005	0.806928
Pes1	4195.18	0.118908	0.0556875	2.13527	0.0327388	0.180525
Pnn	4164.53	0.00391805	0.0537184	0.0729369	0.941856	0.978432
Cotl1	4122.84	-0.168237	0.0689836	-2.43879	0.0147365	0.11201
Mycbp2	4077.35	0.159445	0.0635944	2.50721	0.0121688	0.0998777
Cbfb	4006.3	-0.00909451	0.0578755	-0.157139	0.875135	0.953509
Ppp1r14b	4250.04	-0.125747	0.0670178	-1.87632	0.0606107	0.255568
Dazap2	4149.56	-0.025394	0.0582254	-0.436134	0.66274	0.85456
Sla	4018.03	0.32891	0.121164	2.71458	0.00663605	0.0676486
Sept9	4076.96	0.121104	0.106368	1.13854	0.254897	0.558396
Ankrd17	4059.7	0.0436774	0.0739648	0.590516	0.554845	0.796042
Rapgef1	4117.43	-0.0169923	0.0579238	-0.293357	0.769249	0.903977
Ncaph2	4076.34	-0.0834431	0.0441963	-1.88801	0.0590243	0.252072
Glud1	4039.95	-0.174715	0.0516502	-3.38266	0.000717869	0.0154955
Psma3	4047.7	-0.11009	0.100204	-1.09865	0.271919	0.577292
U2surp	4001.36	0.204975	0.062347	3.28765	0.00101027	0.0193918
Tnfrsf9	3984.34	-0.0703711	0.108196	-0.650406	0.51543	0.774902
H3f3a	4128.64	0.0271589	0.0767432	0.353894	0.723419	0.883815
Exoc2	4027.49	-0.100851	0.115691	-0.871725	0.383358	0.6831
Nap1l4	4025.25	0.0145491	0.0412951	0.352319	0.724599	0.884346
Amd1	3988.71	0.335088	0.0606413	5.52574	3.28102e-08	8.65263e-06
Nup62	4118.95	-0.0583093	0.0524111	-1.11254	0.265908	0.571117
Ahsa1	4134.38	0.0287833	0.0540437	0.532594	0.594315	0.818811
Gabpb2	4002.9	0.101784	0.0725062	1.40379	0.160381	0.439085
Erap1	3973.85	0.109273	0.049493	2.20784	0.0272552	0.16265
Ppp5c	4052	0.0696675	0.0535328	1.3014	0.193122	0.485086
Xpo6	3976.54	-0.0447364	0.0549294	-0.814435	0.415396	0.709942
Hyou1	4023.67	-0.0410092	0.0726395	-0.564558	0.572375	0.804236
Rfwd3	3982.98	0.0522407	0.0523598	0.997725	0.318413	0.62665
Pml	4202.88	-0.461804	0.132947	-3.47358	0.000513558	0.0124904
Srp72	3953.77	0.139333	0.0588148	2.369	0.0178361	0.125723
Psmc1	4110.41	0.107886	0.063635	1.69538	0.0900027	0.320277
Ftl1	4067.58	-0.171213	0.0587459	-2.91447	0.00356295	0.0448362
Mdm4	3940.49	0.129936	0.0588992	2.20608	0.0273785	0.162968
Arl6ip1	3958.55	0.0115213	0.0783146	0.147116	0.883041	0.955935
Ep400	4007.21	-0.084285	0.0613281	-1.37433	0.169339	0.452826
Ppat	3943.23	0.035908	0.0613563	0.585237	0.558388	0.798173
Cd44	3861.17	0.35053	0.120822	2.90121	0.00371727	0.0459095
Dazap1	4062.91	-0.14026	0.0473102	-2.96469	0.00302989	0.0400824
Umps	3981.6	0.0752603	0.0522232	1.44113	0.149548	0.424169
Cd47	4037.27	-0.333782	0.0798435	-4.18045	2.90936e-05	0.00165697
Akt1	4013.51	-0.0661767	0.05508	-1.20147	0.229571	0.531474
Lyar	4031.46	0.0338328	0.0681261	0.49662	0.619457	0.83169
Psmd7	3970.69	0.0775111	0.0568182	1.3642	0.172506	0.457401
Psip1	3967.35	-0.0968503	0.0595069	-1.62755	0.103621	0.34648
Psmb1	3974.15	-0.104404	0.0609272	-1.71358	0.0866061	0.314368
Lbr	3983.55	-0.0910065	0.0578214	-1.57392	0.115505	0.368314
Fnbp1	3993.12	0.104454	0.0700584	1.49096	0.135971	0.402701
Sod1	4077.96	0.00975309	0.052923	0.184288	0.853787	0.943903
Myo1g	3994.76	-0.0552508	0.180658	-0.305831	0.759734	0.900208
Glrx3	3933.36	-0.0655291	0.127268	-0.514891	0.606629	0.825187
Mrfap1	3996.79	-0.0277493	0.060513	-0.458568	0.646545	0.848009
Apobec3	3972.97	-0.12753	0.109478	-1.16489	0.244065	0.546457
Selenof	3860.28	-0.171184	0.137132	-1.24832	0.211914	0.509178
Itgb2	3873.1	0.258598	0.0560455	4.61407	3.94859e-06	0.000437702
Isyna1	3951.09	-0.174386	0.0514342	-3.39046	0.000697757	0.0151693
Dgkz	3932.85	-0.0392798	0.0711034	-0.552431	0.580653	0.80921
Slc25a4	3994.69	0.0938266	0.062377	1.50419	0.132534	0.396171
Sec61a1	3939.15	-0.00132508	0.0566411	-0.0233944	0.981336	0.994075
Uqcrc2	3904.44	0.151269	0.0602444	2.51092	0.0120416	0.0993716
Cyc1	4000.1	-0.15485	0.0586016	-2.64242	0.00823166	0.0773604
Hdac1	3896.83	0.1216	0.0452104	2.68965	0.00715277	0.0705449
Eif3d	3943.05	0.114276	0.0530677	2.15341	0.0312869	0.176203
Eif3k	3992.11	0.0292582	0.0513283	0.57002	0.568664	0.802731
Prkca	3826.62	0.30916	0.082797	3.73395	0.000188497	0.00606541
Rbck1	3945.24	-0.110405	0.0513245	-2.15111	0.0314673	0.176809
Tapbp	4042.79	-0.468498	0.082541	-5.67594	1.37931e-08	4.29036e-06
Gnai3	3837.98	0.0627401	0.0524173	1.19694	0.231332	0.53299
Pim1	4003.07	-0.338873	0.17453	-1.94164	0.0521812	0.235864
Foxp1	3848.1	0.00906966	0.0927092	0.0978292	0.922068	0.971795
Purb	3867.7	0.0630357	0.0621747	1.01385	0.310655	0.619563
Ube2s	3908.88	0.00925765	0.0906468	0.102129	0.918654	0.970536
Rpl17-ps10	3972.08	0.459185	0.306661	1.49737	0.134296	0.399409
Gna13	3918.42	0.0432947	0.0604149	0.716623	0.473607	0.749749
Gm10123	3919.98	-0.265417	0.210073	-1.26346	0.206426	0.502822
Tmed2	3913.19	-0.0361388	0.0497289	-0.726717	0.4674	0.744782
Cops2	3792.31	0.0221931	0.0884882	0.250803	0.801967	0.919846
Arid1a	3873.72	-0.0107556	0.063749	-0.168717	0.866019	0.94963
Edem1	3842.15	-0.202835	0.0626798	-3.23605	0.00121198	0.0220015
Yme1l1	3822.59	0.0632238	0.065059	0.971792	0.331154	0.639482
Ubap2	3856.61	-0.124404	0.0649148	-1.91642	0.055311	0.243026
Supt6	3875.13	0.14203	0.0742296	1.91339	0.0556986	0.244078
Tes	3841.09	0.00855255	0.0838572	0.101989	0.918765	0.970536
Stat6	3870.64	0.0857238	0.0425298	2.01562	0.0438398	0.214357
Eif4a3	3860.1	-0.0269532	0.0505329	-0.53338	0.593771	0.818341
Fam107b	3798.14	-0.0236542	0.0605228	-0.390831	0.695922	0.870439
Tagap	3868.09	-0.0377338	0.0849676	-0.444097	0.656973	0.852339
Pole	3846.72	0.0535382	0.0634516	0.843763	0.398802	0.698168
Nop53	3930.06	-0.169849	0.0481455	-3.52783	0.000418988	0.0107883
Calu	3855.98	0.125019	0.0522398	2.39318	0.0167029	0.120753
Pum3	3827.41	0.185459	0.0619361	2.99437	0.00275015	0.0374452
Ssr1	3843.37	-0.0310415	0.0525047	-0.591214	0.554377	0.795781
Pomp	3864.44	0.0221473	0.0883525	0.25067	0.802069	0.919846
Cand1	3796.23	-0.0665719	0.0580326	-1.14715	0.251321	0.55482
Rars	3861.63	0.142373	0.0511686	2.78243	0.00539542	0.0585998
B4galnt1	3774.23	0.076941	0.0951019	0.809038	0.418493	0.710667
Ap2m1	3778.63	0.0610647	0.0493685	1.23692	0.216118	0.514468
Ilf3	3839.19	0.0438073	0.0540839	0.809987	0.417947	0.710667
E2f4	3800.77	0.012502	0.043779	0.28557	0.775208	0.906938
Slbp	3823.72	-0.0179339	0.0429265	-0.41778	0.676108	0.86154
Hmga1	3937.24	-0.0364768	0.0620494	-0.587866	0.556622	0.796836
Uqcrfs1	3893.65	-0.0888478	0.0474545	-1.87227	0.0611689	0.256584
Rfc1	3791.1	0.0425998	0.0549823	0.774791	0.438463	0.724856
Rcc1	3818.63	0.0884341	0.0639776	1.38227	0.166889	0.449997
Fkbp8	3838.11	-0.123432	0.0630899	-1.95645	0.0504127	0.2313
Eif6	3866.06	-0.0900588	0.0729215	-1.23501	0.216826	0.515648
Phf6	3701.66	0.165228	0.0838208	1.97121	0.0487002	0.227049
Ahctf1	3695.18	0.162681	0.0543294	2.99435	0.00275028	0.0374452
Il12rb1	3844.21	0.0685179	0.0584355	1.17254	0.240981	0.542971
Snrpd1	3774.48	0.0360652	0.0945874	0.38129	0.702988	0.873911
Ddx24	3842.17	-0.16334	0.0890939	-1.83335	0.0667511	0.271018
Jpt1	3781.66	-0.0367412	0.0650149	-0.56512	0.571992	0.803964
Ccnd3	3830.93	-0.151299	0.0642661	-2.35426	0.0185597	0.128729
Ptp4a3	3731.91	-0.254742	0.103065	-2.47167	0.0134484	0.106708
Hectd1	3700.26	0.210543	0.0705418	2.98466	0.00283892	0.0381746
Rps3a2	3818.97	1.18797	0.873293	1.36033	0.173725	0.459141
Prpf38b	3789.56	0.0486733	0.0545851	0.891696	0.372556	0.675475
Il2rg	3707.2	0.106491	0.0641245	1.66069	0.0967767	0.334472
Prmt5	3702.33	0.171974	0.0607705	2.82989	0.00465643	0.053441
Kpna3	3713.79	0.04971	0.053154	0.935206	0.349682	0.65426
Prpf4b	3698.58	0.139164	0.0436724	3.18654	0.00143986	0.0245026
Skp1a	3718.09	0.0504693	0.0456364	1.1059	0.26877	0.574186
Tcf7	3673.73	0.0269088	0.0742555	0.362382	0.717067	0.880172
Agpat3	3778	-0.117096	0.0689228	-1.69894	0.08933	0.319382
Dlst	3723.3	0.012589	0.0511201	0.246263	0.805479	0.921532
Kpna4	3654.6	-0.0968765	0.04576	-2.11705	0.0342552	0.185005
Txn2	3708.19	-0.00519599	0.0666496	-0.0779599	0.93786	0.97728
Tomm40	3766.83	-0.12459	0.057243	-2.17651	0.029517	0.170266
Grk6	3750.97	-0.023598	0.0564013	-0.418395	0.675658	0.861538
Prdx3	3734.33	0.152939	0.0715676	2.13698	0.0325996	0.180249
Tmem123	3802.61	-0.0704012	0.272149	-0.258686	0.795877	0.916563
Zc3hav1	3746.54	-0.323375	0.0720525	-4.48806	7.1876e-06	0.000655585
Bcl2l1	3724.01	0.24069	0.10296	2.3377	0.019403	0.131643
Txlna	3680.31	0.0579588	0.0494258	1.17264	0.240939	0.542971
Ppan	3721.76	0.0826691	0.0656155	1.2599	0.207705	0.50343
Prrc2b	3678.31	0.0500288	0.073915	0.676842	0.498506	0.765999
Gbp5	3772.81	-0.406997	0.0722846	-5.63047	1.79718e-08	5.4504e-06
Gm15427	3643.15	-0.0554421	0.121667	-0.455687	0.648615	0.849454
Psmb8	3806.66	-0.117052	0.083908	-1.39501	0.163013	0.443887
Eif1ax	3714.81	0.119609	0.0668376	1.78954	0.0735276	0.286253
Lman2	3694.66	-0.0823988	0.056805	-1.45056	0.146904	0.419809
Ecpas	3658.12	-0.0332949	0.0553375	-0.601669	0.547394	0.791857
Bop1	3682.52	0.041098	0.052108	0.788709	0.430282	0.720165
Malt1	3604.74	-0.00738161	0.10115	-0.0729765	0.941825	0.978432
Rapgef6	3606.61	0.020952	0.0854517	0.245191	0.806309	0.921984
Cd3e	3598.98	0.0752901	0.101465	0.74203	0.458069	0.741236
Ptpn7	3620.85	0.138486	0.0897173	1.54358	0.122691	0.379962
Rif1	3556.75	0.126734	0.075937	1.66893	0.0951305	0.331236
Ptpn1	3744.64	-0.361546	0.108444	-3.33393	0.000856271	0.0174777
Numa1	3682.15	-0.0628632	0.0745723	-0.842982	0.399238	0.698168
Arf3	3688.7	0.0479839	0.0591206	0.811628	0.417005	0.710457
Baz1a	3608.19	0.05718	0.0736978	0.775872	0.437825	0.724468
Polr1a	3661.47	0.0453247	0.066754	0.678982	0.497149	0.765389
Puf60	3674.47	-0.00496438	0.0454904	-0.10913	0.913099	0.967779
Dcaf7	3623.26	0.0468331	0.0618242	0.757519	0.448739	0.732812
Skiv2l2	3592.29	0.144971	0.0565498	2.5636	0.0103594	0.0898513
Aldh18a1	3673.93	0.23479	0.0741284	3.16734	0.00153843	0.0254355
Gmps	3602.19	0.138979	0.0567829	2.44754	0.0143834	0.111208
Utp4	3575.53	0.231806	0.0667183	3.47441	0.000511987	0.0124904
Vasp	3749.63	0.0503262	0.075141	0.669757	0.503013	0.768703
Ncoa3	3645.11	-0.0660381	0.104536	-0.631728	0.527565	0.781809
Luc7l3	3607.28	0.0996966	0.0721933	1.38097	0.167289	0.450441
Smc3	3632.05	0.120058	0.0543836	2.20761	0.0272715	0.16265
Far1	3535.4	0.0452284	0.0829578	0.545198	0.585618	0.812693
Alkbh5	3688.35	-0.325882	0.0836057	-3.89784	9.70538e-05	0.00397756
Serp1	3611.59	-0.174054	0.079836	-2.18014	0.0292471	0.169193
Lars2	3810.31	0.630987	0.25705	2.45473	0.0140991	0.109991
Clptm1l	3588.16	-0.0889634	0.0440385	-2.02013	0.0433703	0.213092
Nadk	3601.82	0.01622	0.0479619	0.338186	0.735223	0.889801
Rpsa-ps10	3679.37	-0.0150978	0.090535	-0.166762	0.867557	0.950406
Ccar1	3536.01	0.117578	0.0784967	1.49787	0.134166	0.399208
Csnk2a1	3622.07	0.122396	0.0746428	1.63975	0.101057	0.341458
Copb2	3597.87	0.0915345	0.0512511	1.786	0.074099	0.286705
Sept1	3592.21	-0.146298	0.0503824	-2.90375	0.00368727	0.0457702
Rnf4	3543.94	0.199544	0.066692	2.99203	0.00277129	0.0375206
Akt2	3656.32	-0.160202	0.0528231	-3.0328	0.00242294	0.0346612
Alyref	3637.27	-0.0769603	0.0570635	-1.34868	0.17744	0.463807
Xpo5	3555.66	0.224294	0.0680796	3.29458	0.000985689	0.0190102
Wdr26	3555.87	-0.0340444	0.0610671	-0.557492	0.577191	0.806951
Casp3	3513.46	-0.0313624	0.071275	-0.440019	0.659923	0.853377
Akap8	3607.1	0.0960976	0.0505371	1.90153	0.0572332	0.246993
Fyn	3555.53	0.0845531	0.0805568	1.04961	0.293898	0.603304
Polr2m	3568.56	-0.0702963	0.0479243	-1.46682	0.142425	0.413098
Bms1	3602.58	0.167739	0.0812186	2.06528	0.0388962	0.199261
Psme2	3622.78	-0.125839	0.119869	-1.0498	0.29381	0.603304
Vps35	3536.26	0.0451069	0.0740476	0.609162	0.542417	0.789355
Srpr	3579.89	-0.0431503	0.0611824	-0.705273	0.48064	0.754595
Clint1	3575.41	-0.0805437	0.0633962	-1.27048	0.203913	0.499732
Uqcrq	3656.84	-0.0546927	0.0957072	-0.571459	0.567689	0.802731
Cnot6	3497.3	0.0218268	0.0480426	0.454321	0.649598	0.850083
Dbnl	3562.53	-0.145963	0.055646	-2.62306	0.00871431	0.0803028
Snhg1	3597.8	0.125603	0.0861801	1.45744	0.144994	0.417003
Stard7	3598.36	-0.0166644	0.0405735	-0.410722	0.681277	0.863672
Pprc1	3547.1	0.0729785	0.0591887	1.23298	0.217583	0.515842
Chmp4b	3658.07	-0.375526	0.0904993	-4.14949	3.33223e-05	0.00183742
Rasal3	3573.74	0.0406899	0.0606876	0.670481	0.502551	0.768686
Setd5	3533.01	0.344244	0.087701	3.9252	8.66587e-05	0.00367572
Ankrd11	3588.56	-0.016627	0.0849854	-0.195645	0.844888	0.939833
Nckap1l	3539.42	0.148696	0.0576302	2.58018	0.00987498	0.0865559
Trrap	3511.61	-0.0120062	0.0777082	-0.154504	0.877213	0.95402
Lrpprc	3479.58	0.183899	0.0590386	3.1149	0.00184006	0.0289517
Tnks2	3473.93	0.151837	0.0469301	3.23539	0.00121476	0.0220015
Nup107	3515.3	0.192157	0.0561311	3.42336	0.000618517	0.014138
Sept6	3537	0.202416	0.0754421	2.68306	0.00729511	0.0714839
Sbno1	3476.73	0.133192	0.0653337	2.03864	0.0414863	0.207204
Txnl1	3547.5	-0.0550415	0.0578481	-0.951483	0.341359	0.649015
Mtpn	3486.8	0.0107809	0.0498363	0.216327	0.828733	0.931935
Nup155	3489.46	0.17734	0.0660199	2.68616	0.00722793	0.0711704
Fam168b	3540.55	-0.128164	0.0478769	-2.67694	0.00742972	0.0721814
Sec24c	3549.54	-0.0435261	0.0510281	-0.852983	0.393669	0.692316
Azin1	3451.72	0.325852	0.0769921	4.23228	2.31336e-05	0.00142454
Gm16286	3491.18	-0.00299174	0.0514452	-0.0581539	0.953626	0.983353
Clic1	3567.78	0.0526177	0.0673049	0.78178	0.434344	0.723038
Ddost	3517.09	-0.0376258	0.0415091	-0.906449	0.364698	0.669348
Rab10	3503.94	-0.0180276	0.0473503	-0.380729	0.703405	0.873912
Shmt1	3493.87	0.16022	0.0592909	2.70227	0.00688686	0.069045
Cox8a	3574.04	-0.0976379	0.087006	-1.1222	0.261779	0.56608
Rap1a	3452.24	0.054906	0.0700702	0.783585	0.433283	0.722225
Nup160	3415.1	0.271927	0.0571196	4.76067	1.92954e-06	0.000238056
Prpf31	3563.55	0.0915048	0.0735865	1.2435	0.213684	0.511942
Wdr36	3472.12	0.0883659	0.0471446	1.87436	0.0608811	0.255996
Pafah1b1	3483.81	-0.00901944	0.0415631	-0.217006	0.828204	0.931825
Ctcf	3456.2	0.0224025	0.0619268	0.361759	0.717532	0.880387
Nsd1	3440.15	0.243246	0.064049	3.7978	0.000145984	0.00511831
Tbrg4	3471.6	0.0247696	0.058834	0.421008	0.673749	0.860796
Psmc4	3493.42	0.0701909	0.053607	1.30936	0.190412	0.481876
Ppp2r5a	3522.06	-0.218991	0.0460134	-4.75929	1.94276e-06	0.000238056
Pitrm1	3448.71	0.198317	0.0709083	2.7968	0.00516114	0.0570216
Cytip	3474.39	-0.187767	0.12027	-1.56121	0.118474	0.37289
Psd4	3471.9	0.136432	0.0492813	2.76843	0.00563279	0.0606312
Ppp1r15b	3491.71	-0.00261668	0.0496253	-0.0527287	0.957948	0.984918
Ncapg2	3415.03	0.0972384	0.0557278	1.74488	0.0810054	0.302311
Capza2	3431.46	-0.00823751	0.0593736	-0.13874	0.889655	0.959196
Cox6a1	3525.22	-0.224501	0.0616523	-3.6414	0.000271155	0.00804457
Sfxn1	3422.5	0.120448	0.0415075	2.90184	0.00370981	0.0459095
Eif4g3	3434.92	0.0438273	0.0464921	0.942682	0.345844	0.651098
Nacc1	3488.81	-0.0759739	0.0581205	-1.30718	0.191152	0.483197
Nup188	3433.12	0.0929047	0.0661151	1.4052	0.159963	0.438688
Eif3g	3512.97	0.0260013	0.0626533	0.415004	0.678139	0.861866
Yars	3495.57	0.137665	0.059234	2.32409	0.0201207	0.135002
Atp11b	3462.15	-0.170855	0.0779659	-2.19141	0.028422	0.166692
Ckap5	3362.69	0.243234	0.103429	2.35169	0.0186883	0.129297
Hdac2	3440.08	-0.00109852	0.0642354	-0.0171014	0.986356	0.995382
Rbbp6	3443.76	-0.0180217	0.0598985	-0.300871	0.763513	0.901586
Cbx3	3452.16	0.0687134	0.0729866	0.941453	0.346473	0.651301
Psma6	3460.44	0.0362907	0.0556069	0.652629	0.513996	0.773704
Usp24	3349.95	0.107921	0.0652459	1.65407	0.0981132	0.337215
Aqr	3391.79	0.213381	0.0836327	2.55141	0.0107288	0.0920442
Snrpe	3369.27	-0.158059	0.123501	-1.27982	0.200609	0.495614
Pdap1	3564.3	-0.0619891	0.0766744	-0.808471	0.418819	0.710758
Chtf8	3506.43	0.192551	0.0732122	2.63005	0.00853731	0.0792561
Exosc10	3410.93	0.154994	0.0657353	2.35785	0.018381	0.128076
Ppp2r5c	3363.09	0.130121	0.0632958	2.05577	0.0398051	0.201618
Bub3	3400.58	0.140949	0.0507406	2.77784	0.00547217	0.0593765
Cdk6	3386.89	0.0439955	0.0900898	0.488352	0.625301	0.835232
Noc4l	3405.08	0.0770512	0.0593216	1.29887	0.193988	0.486112
Nup98	3400.43	-0.00675458	0.0717116	-0.0941908	0.924958	0.973022
Tnfsf8	3329.9	-0.285399	0.197237	-1.44698	0.147902	0.421286
Tipin	3384.07	0.118841	0.065839	1.80502	0.0710713	0.280836
Rabggtb	3404.22	0.279812	0.0673862	4.15236	3.29066e-05	0.00182279
Mapkapk2	3490.32	0.0125712	0.0975948	0.12881	0.897508	0.96198
Etnk1	3454.42	-0.26449	0.0942655	-2.8058	0.00501912	0.0558946
Nomo1	3377.72	-0.0802877	0.0589483	-1.362	0.173197	0.458246
Notch1	3349.46	0.0250515	0.115099	0.217651	0.827701	0.931605
Pgd	3478.25	-0.259962	0.0804533	-3.23122	0.00123265	0.0221746
Stat5b	3398.87	-0.0526331	0.10457	-0.503331	0.614732	0.828444
Lsm14a	3386.23	0.137082	0.0410581	3.33874	0.000841595	0.017324
Wdr82	3397.89	0.0374062	0.0481238	0.777293	0.436986	0.723903
Nfatc1	3340.25	-0.0192718	0.0895035	-0.215319	0.829519	0.932196
Psmc5	3407.38	0.0421346	0.0665079	0.633529	0.526389	0.780948
Selenot	3263.61	-0.0467915	0.063773	-0.73372	0.46312	0.742926
Rbm28	3382.62	0.14563	0.0507716	2.86834	0.00412632	0.0490749
H13	3397.9	-0.0380956	0.0494805	-0.76991	0.441353	0.727651
Dnmt3a	3298.8	0.198701	0.108599	1.82968	0.067298	0.272351
Arpc3	3439.66	0.0571211	0.0546186	1.04582	0.295645	0.605684
Kcnab2	3405.81	-0.0927679	0.098963	-0.9374	0.348553	0.653826
Sf3a1	3379.51	-0.143064	0.0501064	-2.85521	0.00430089	0.0506053
Farsb	3401.91	0.263647	0.0534744	4.93033	8.20906e-07	0.000115795
Zc3h15	3377.27	0.0498156	0.0462156	1.07789	0.281081	0.589725
Ifrd2	3373.89	0.0452603	0.0566	0.799652	0.423912	0.714986
Pebp1	3483.61	0.0255322	0.0966344	0.264214	0.791615	0.914346
Gm4204	3374.89	-0.0116762	0.045472	-0.256779	0.79735	0.917534
Wapl	3329.91	0.0820743	0.0551062	1.48938	0.136386	0.403398
Rab7	3353.35	0.0525181	0.0535743	0.980285	0.326945	0.63508
Serpinb6b	3197.11	0.10191	0.20634	0.493892	0.621382	0.83295
Nefh	3358.09	-0.113802	0.0769591	-1.47873	0.139213	0.408315
Ptpn11	3337.78	0.223899	0.0702921	3.18527	0.0014462	0.0245026
Gnb2	3412.6	-0.132978	0.0575851	-2.30924	0.0209304	0.138068
Rnf213	3602.08	-0.800751	0.308307	-2.59725	0.00939738	0.0841325
Rps27l	3289.49	-0.132434	0.141642	-0.934991	0.349793	0.654331
Trp53	3343.71	-0.162721	0.0505186	-3.22101	0.00127741	0.0225893
Ubqln1	3315.65	-0.0301977	0.0534556	-0.564912	0.572134	0.804049
Npm3	3330.7	-0.137916	0.0799681	-1.72464	0.0845929	0.310404
Il21r	3349.65	-0.103353	0.108008	-0.956902	0.338616	0.646449
Brd4	3316.27	-0.124842	0.0630026	-1.98154	0.047531	0.223488
Tcerg1	3290.98	0.0146523	0.04966	0.295053	0.767953	0.90326
Bcat1	3278.22	0.254438	0.0761318	3.34207	0.000831548	0.0173006
Pitpna	3315.52	-0.110557	0.0597204	-1.85124	0.0641347	0.264362
Ndufa4	3349.93	-0.0481983	0.130979	-0.367985	0.712884	0.878415
2900097C17Rik	3350.18	-0.037664	0.0623526	-0.604048	0.545812	0.790785
Rnf10	3344.31	-0.110349	0.0537894	-2.0515	0.0402183	0.203118
Sae1	3293.53	0.0510198	0.0541284	0.94257	0.345901	0.651098
Arhgap30	3385.5	-0.0123204	0.0705384	-0.174662	0.861345	0.947152
Psmb9	3374.57	-0.152768	0.0614113	-2.48762	0.0128601	0.103834
Psmd6	3315.08	0.0354179	0.0687276	0.515338	0.606317	0.824947
Kif5b	3200.89	0.14806	0.0563741	2.62639	0.00862959	0.0797779
Nrd1	3276.97	-0.0160052	0.0521122	-0.307131	0.758744	0.899592
Htt	3277.89	0.0360907	0.0633549	0.569659	0.568909	0.802731
Lnpep	3235.82	0.17827	0.0888735	2.00589	0.0448681	0.216937
Upf1	3303.43	-0.105501	0.0708645	-1.48877	0.136548	0.403661
Ppp4c	3330.57	-0.0569047	0.0552504	-1.02994	0.303037	0.612751
Dennd2d	3275.06	0.150487	0.0730261	2.06073	0.0393284	0.200542
Akr1a1	3324.23	0.0856189	0.0465035	1.84113	0.0656027	0.268769
Cdk1	3294.76	0.139492	0.0765653	1.82187	0.0684741	0.27503
Hk2	3379.26	-0.255461	0.14143	-1.80627	0.0708769	0.280525
U2af1	3298.24	0.0808131	0.0538739	1.50004	0.133603	0.398232
Ptpa	3322.62	-0.0180195	0.0584499	-0.308289	0.757862	0.899485
Polr2b	3284.97	0.255402	0.0610071	4.18643	2.83377e-05	0.00162597
Chordc1	3212.99	0.143814	0.0619006	2.3233	0.0201628	0.13521
Slc35a4	3277.89	0.0945269	0.058392	1.61883	0.105483	0.349813
Rpl21-ps15	3403.16	-0.0446404	0.10614	-0.420579	0.674062	0.860796
Zranb2	3282.09	0.0167032	0.0708439	0.235774	0.813608	0.925226
Cox7c	3264.03	0.0641431	0.138698	0.462467	0.643746	0.847042
Ahcyl1	3251.33	-0.0793402	0.0412058	-1.92546	0.0541716	0.240409
Hmgcs1	3302.58	-0.524608	0.0582006	-9.01378	1.99066e-19	2.41487e-15
Cd4	3198.49	0.660548	0.103494	6.38246	1.74261e-10	1.17442e-07
Prps1	3255.54	0.128597	0.0575043	2.23631	0.0253317	0.156114
Usp34	3118.08	0.27114	0.0927652	2.92286	0.00346831	0.0439646
Ppp4r3b	3158.91	0.0864943	0.060108	1.43898	0.150156	0.424503
Dnajc8	3301.25	0.0940879	0.0591481	1.59072	0.111673	0.360774
Psmc2	3245.62	0.0509611	0.0575664	0.885258	0.376018	0.677324
Coro1c	3284.64	-0.0405174	0.0643482	-0.629659	0.528918	0.782792
Rrp1b	3235.6	0.154531	0.0571793	2.70258	0.0068804	0.069045
Aprt	3332.08	-0.01323	0.0585149	-0.226097	0.821126	0.928574
Setx	3212.88	-0.0846498	0.0702147	-1.20558	0.227978	0.529711
Tufm	3305.8	-0.0193352	0.0641893	-0.301222	0.763246	0.901586
Elmo1	3178.75	0.0792905	0.0653075	1.21411	0.224706	0.526034
Sptbn1	3224.61	0.07139	0.0801021	0.891238	0.372802	0.675671
St6galnac4	3261.54	0.0666051	0.0605367	1.10024	0.271226	0.577292
Prelid3b	3222.96	0.160747	0.0751998	2.1376	0.0325495	0.180136
Nip7	3240.55	-0.0140834	0.127561	-0.110405	0.912088	0.96741
Wbp11	3251.84	-0.116382	0.0634099	-1.83539	0.0664481	0.270497
Rbm17	3292.17	0.00555186	0.053	0.104752	0.916573	0.969763
Timm50	3260.58	0.152013	0.0620368	2.45037	0.014271	0.110833
Ctps	3211.52	0.158787	0.0649969	2.443	0.0145659	0.111791
Bhlhe40	3147.22	0.0828283	0.122573	0.675745	0.499203	0.766657
Fmnl1	3174.74	-0.0307044	0.0717351	-0.428025	0.668633	0.85816
Cd74	3587.33	-0.627762	0.873908	-0.718339
Cpsf1	3218.87	-0.119587	0.0562385	-2.12643	0.0334674	0.182469
Smg5	3215.29	0.0565563	0.0668893	0.84552	0.39782	0.697091
Atp5j2	3218.53	-0.122292	0.143111	-0.854527	0.392813	0.691412
Tpp2	3137.35	0.122201	0.0637562	1.9167	0.0552762	0.243026
Gimap6	3212.53	-0.229332	0.0979574	-2.34114	0.0192252	0.13124
Elavl1	3231.69	0.000310182	0.0541819	0.00572483	0.995432	0.998143
Kmt2d	3242.41	0.186	0.0742687	2.50442	0.0122654	0.100535
Gtf2i	3195.22	-0.185753	0.0732594	-2.53555	0.0112272	0.0950015
Parvg	3209.93	0.245038	0.0572489	4.28023	1.86703e-05	0.00121769
Psmd14	3177.36	-0.0625618	0.0470435	-1.32987	0.183561	0.472878
Polr1b	3176.12	0.0785582	0.0570784	1.37632	0.168722	0.452424
Lsp1	3284.33	0.203065	0.228775	0.88762	0.374745	0.676795
Cherp	3171.35	-0.0639657	0.0591661	-1.08112	0.279643	0.587726
Ppig	3188.92	0.0221771	0.060038	0.369385	0.711841	0.878173
Psma5	3213.04	0.142513	0.0597921	2.38347	0.0171502	0.122454
Wdr75	3116.68	0.20975	0.0579118	3.62189	0.000292453	0.00846299
Psmb2	3197.52	0.037772	0.0681368	0.554355	0.579336	0.808175
Nfkbia	3160.71	0.0188221	0.0829664	0.226865	0.820529	0.928443
Copb1	3124.1	0.152385	0.0532859	2.85976	0.00423958	0.0500295
Myo9b	3155.39	-0.0928122	0.0628789	-1.47605	0.139931	0.409109
Acsl4	3111.86	0.0467925	0.0568314	0.823357	0.410305	0.707421
Idh3a	3109.9	0.131135	0.0439507	2.98369	0.00284791	0.0381746
Sh3kbp1	3122.24	0.125466	0.111017	1.13015	0.258411	0.562899
Wdr3	3142.67	0.239191	0.061003	3.92098	8.81913e-05	0.00371475
Fxyd5	3215.36	0.104144	0.0550185	1.8929	0.0583716	0.250241
Uhmk1	3089.29	0.154275	0.0672802	2.29303	0.0218463	0.141872
Supt5	3179.52	0.058802	0.0546839	1.07531	0.282237	0.591145
Nmt1	3147.49	0.0644158	0.0527789	1.22048	0.222281	0.522678
Srebf1	3230.79	-0.430645	0.0623192	-6.91031	4.83588e-12	7.33301e-09
Psmb6	3179.09	0.0417219	0.0764253	0.545917	0.585123	0.812693
Glyr1	3164.1	0.0470159	0.0565322	0.831667	0.405597	0.702899
Pdcd6ip	3061.65	-0.136386	0.0613925	-2.22155	0.0263139	0.15944
Smc6	3094.93	-0.0185563	0.0596606	-0.311031	0.755777	0.899033
Rrp12	3158.06	0.172924	0.0612962	2.82112	0.00478561	0.0542057
Ap2b1	3118.61	0.0809559	0.0601644	1.34558	0.178438	0.465613
Snrpg	3246.28	0.0534145	0.0916792	0.582624	0.560147	0.799522
Ube2n	3108.52	-0.0265959	0.0410884	-0.647283	0.517449	0.776728
Tyms	3103.43	0.0539882	0.0866352	0.623167	0.533175	0.785683
Ccl3	2921.14	0.562724	0.309751	1.8167	0.0692631	0.276756
Rbmxl1	3136.16	-0.0647184	0.0676636	-0.956472	0.338834	0.646449
Taf10	3178.3	-0.167391	0.0731799	-2.2874	0.0221727	0.143225
Tnpo3	3096.32	0.203221	0.0533817	3.80694	0.000140696	0.00501996
Hcls1	3180.26	0.0322951	0.0769515	0.419682	0.674718	0.860945
Surf4	3130.11	-0.165934	0.0685004	-2.42238	0.015419	0.115475
Hk1	3203.71	-0.35003	0.0989455	-3.53761	0.000403772	0.0105564
Sms	3046.12	0.0122323	0.0687406	0.177949	0.858763	0.945621
Prdx6	3111.79	0.0948414	0.0655535	1.44678	0.147959	0.421337
Pdha1	3118.54	0.252832	0.0581295	4.34946	1.36476e-05	0.000979638
Sbf1	3086.68	-0.112136	0.0595328	-1.88359	0.0596199	0.253381
Me2	3101.97	-0.120482	0.0632893	-1.90368	0.0569522	0.246569
Npepl1	3089.49	-0.0326956	0.0903025	-0.362068	0.717301	0.880264
Cblb	3064.42	-0.241267	0.0683398	-3.53041	0.000414918	0.0107321
Qars	3108.38	0.075405	0.0679772	1.10927	0.267314	0.572021
Wdr18	3108.84	0.0458807	0.0515938	0.889268	0.373859	0.676
Fnbp4	3081.2	0.0148782	0.0507529	0.29315	0.769407	0.903989
Sdad1	3099.56	0.123269	0.0555006	2.22103	0.0263489	0.15944
Msh6	3104.25	-0.0761238	0.0585349	-1.30049	0.193434	0.485127
Nfatc3	3028.05	0.139722	0.0689068	2.02769	0.0425916	0.21046
Arih1	3022.39	0.0727415	0.0455487	1.59701	0.110265	0.358803
Tgfb1	3084.5	-0.211964	0.0557844	-3.7997	0.00014487	0.00510878
Sema4d	3102.73	-0.137648	0.103052	-1.33571	0.181644	0.469434
Chd1	3037.61	0.157377	0.0661684	2.37843	0.0173867	0.123543
Smyd5	3090.95	-0.0764031	0.0579333	-1.31881	0.187232	0.477166
Galk1	3186.22	-0.245755	0.0679929	-3.61442	0.000301026	0.00863297
Larp4b	3018.97	0.167976	0.0597091	2.81324	0.00490455	0.0551986
Eif3j1	3045.55	-0.0284329	0.0684791	-0.415205	0.677992	0.861866
Zfp36l2	3113.24	-0.0749755	0.0799758	-0.937477	0.348513	0.653826
Gatad2a	3087.19	-0.0777816	0.051648	-1.50599	0.132069	0.395452
Mapk1ip1l	3034.24	-0.0362545	0.0510596	-0.710042	0.477678	0.753156
Mbd3	3073.27	-0.288698	0.065363	-4.41684	1.00154e-05	0.000778826
Sar1a	3058.53	0.0766043	0.0520383	1.47208	0.141	0.410874
Psmd11	3036.07	0.0240993	0.0532976	0.452165	0.65115	0.850473
Hspa14	3016.88	-0.0234596	0.0634837	-0.369537	0.711728	0.87815
Ankrd13a	3027.83	-0.0715607	0.061026	-1.17263	0.240946	0.542971
Atad3a	3059.69	0.0312848	0.0638285	0.490138	0.624036	0.834633
D17Wsu92e	3112.37	-0.183141	0.0578251	-3.16716	0.00153935	0.0254355
Mta1	3026.99	-0.070994	0.0598482	-1.18624	0.235529	0.537574
Kcnn4	3036.07	0.0620262	0.104833	0.591668	0.554073	0.795628
Hadha	3035.4	0.066546	0.057389	1.15956	0.246228	0.548877
Slc6a6	3031.42	0.00666212	0.0801471	0.0831237	0.933753	0.976623
Xpo4	2942.87	0.23405	0.064932	3.60453	0.000312713	0.00876103
Nol9	3036.91	-0.00187336	0.0610649	-0.0306781	0.975526	0.991305
Zfp280b	3023.64	0.0425822	0.106444	0.400044	0.689124	0.867376
Wasf2	3053.43	0.0253152	0.0670147	0.377755	0.705613	0.874965
Atp13a1	3067.36	-0.129312	0.0508342	-2.5438	0.0109654	0.0934798
Nup50	3026.3	-0.164699	0.0478354	-3.44302	0.000575246	0.0134457
Rel	2934.71	0.333935	0.10786	3.09599	0.00196155	0.0302358
Nop10	3116.53	-0.0102063	0.106542	-0.0957963	0.923682	0.972541
Cox6c	3007.27	-0.0654483	0.142311	-0.459896	0.645591	0.847756
Sdhb	3005.2	0.130079	0.0666963	1.95031	0.0511391	0.233399
Adam10	2993.13	0.201147	0.0902645	2.22842	0.0258528	0.157677
Safb	3059.85	-0.151302	0.0574743	-2.63251	0.00847566	0.0789088
Acaca	3000.19	0.0159944	0.0828875	0.192965	0.846986	0.940333
Zc3h12d	2998.03	-0.128259	0.085126	-1.50669	0.131889	0.39544
Psmd13	3048.02	-0.0468899	0.068982	-0.679741	0.496669	0.7653
Gfi1	3101.97	-0.219134	0.114309	-1.91704	0.055233	0.243026
Mcmbp	3004.94	-0.0885042	0.0453776	-1.95039	0.0511292	0.233399
Sp1	2984.32	0.247942	0.0584195	4.24417	2.19405e-05	0.00136493
Idi1	2963.51	-0.27812	0.0790277	-3.51927	0.000432729	0.0110748
Nat10	3008.73	0.0655403	0.0553696	1.18369	0.236537	0.538647
Spcs2	3014.15	-0.0132677	0.0524902	-0.252765	0.80045	0.919445
Dusp11	2972.46	0.0776775	0.0629278	1.23439	0.217057	0.515691
Aes	3076.5	-0.0949684	0.0652331	-1.45583	0.145439	0.41762
Tmed5	2916.29	-0.0709877	0.0700144	-1.0139	0.31063	0.619563
Prkcsh	3017.49	-0.133756	0.0856201	-1.5622	0.118241	0.372472
Smg7	2985.44	0.0674115	0.0754957	0.892919	0.3719	0.674772
Ints7	2959.95	-0.150935	0.0695476	-2.17024	0.0299888	0.172333
Ipo9	2947.88	0.0699668	0.0549743	1.27272	0.203118	0.498348
Map4k1	2992.1	0.0343163	0.0713024	0.481279	0.630319	0.838604
Hars	2998.81	0.033598	0.0806945	0.416361	0.677146	0.861713
Stk17b	2963.3	0.0801063	0.0718401	1.11506	0.264823	0.569887
Dynll1	2953.89	0.0375311	0.0620654	0.604702	0.545377	0.790754
Tomm5	2992.91	-0.110913	0.128645	-0.862159	0.3886	0.687789
Otud5	3040.65	-0.266126	0.076378	-3.48433	0.000493375	0.0122146
Nol11	2895.37	0.250623	0.0704235	3.55879	0.000372563	0.00995497
Cul1	2956.57	0.0542322	0.0495014	1.09557	0.273267	0.57904
Gapvd1	2934.54	0.025358	0.0631251	0.40171	0.687897	0.866817
Cntrl	2930.96	0.182365	0.0716384	2.54563	0.0109081	0.0933376
Ddx23	2989.61	0.0788082	0.0589979	1.33578	0.181622	0.469434
Senp3	2984.77	-0.030141	0.0554342	-0.543726	0.58663	0.81298
Ptprs	2971.29	0.237828	0.0968534	2.45554	0.0140672	0.109813
Nabp1	2970.53	-0.056913	0.0978357	-0.58172	0.560755	0.79992
Cd3d	2984.48	0.100968	0.0909547	1.1101	0.266958	0.571561
Sumo1	2947.9	-0.058442	0.113651	-0.514221	0.607098	0.825628
Gm12191	3063.82	-1.11992	0.776657	-1.44198	0.149309	0.423725
Sf3b4	2996.52	-0.0866822	0.0620804	-1.39629	0.162627	0.443427
Thap12	2943.82	0.130391	0.0507822	2.56766	0.0102387	0.0891001
Fam111a	2988.1	0.176301	0.0833077	2.11626	0.0343223	0.185132
Chd3	2947.76	0.346197	0.0870745	3.97587	7.01211e-05	0.0031186
Dusp2	2980.5	0.201496	0.113242	1.77934	0.0751844	0.289084
Psmd12	2924.28	0.0388429	0.0550762	0.705258	0.48065	0.754595
Tcea1	2876.7	0.0634522	0.0636533	0.996841	0.318842	0.627087
Cstf2	2881.64	0.130844	0.0599146	2.18383	0.0289745	0.168432
Dock8	2895.09	0.0832007	0.0800686	1.03912	0.29875	0.608047
Fignl1	2923.63	0.055142	0.0796137	0.69262	0.488548	0.75897
Atp5e	3022.65	-0.0850211	0.093411	-0.910183	0.362726	0.667612
Fgfr1op2	2868.95	-0.0813383	0.0397736	-2.04503	0.0408516	0.205399
Eed	2923.5	0.0595407	0.0646382	0.921137	0.356979	0.661105
Rer1	2930.54	0.0659659	0.0595538	1.10767	0.268005	0.573157
Max	2965.66	-0.0735316	0.0651712	-1.12828	0.2592	0.563341
Ndufs2	2952.17	0.00774465	0.0507002	0.152754	0.878592	0.954445
Tsn	2911.16	-0.0203255	0.050088	-0.405796	0.684893	0.86505
Picalm	2845.52	0.0736049	0.10855	0.678074	0.497725	0.765553
Usp15	2922.02	0.0580984	0.0565677	1.02706	0.304393	0.614013
Rbm38	2937.22	-0.125926	0.0566985	-2.22098	0.0263522	0.15944
Rbm10	2944.55	-0.107736	0.0554629	-1.94248	0.0520791	0.235736
Ociad1	2928.12	0.030857	0.0468988	0.657948	0.510572	0.772247
Ccnb1	2836.38	0.345244	0.144499	2.38926	0.0168826	0.1214
Dnttip2	2900.02	0.156309	0.0727075	2.14983	0.0315686	0.177023
Jund	3013.6	-0.136224	0.0734113	-1.85563	0.063507	0.262757
Diaph1	2899.24	-0.0935883	0.0600918	-1.55742	0.11937	0.374243
Utp6	2898.78	0.18066	0.0563323	3.20703	0.00134111	0.023308
Nifk	2944.25	0.179821	0.0666266	2.69894	0.00695607	0.0693378
Lrrfip1	2892.74	0.0498775	0.0717881	0.694788	0.487188	0.758241
Rsrp1	2907.43	-0.318364	0.07265	-4.38217	1.17504e-05	0.000879904
Nras	2872.83	0.04753	0.0585551	0.811714	0.416956	0.710457
Grap	2893.1	0.199126	0.0657608	3.02804	0.00246149	0.0350385
Dgkd	2881.34	0.0804101	0.0567258	1.41752	0.15633	0.432662
Sdhd	2965.37	0.0799585	0.0588496	1.35869	0.174244	0.459613
Rfc2	2907.95	-0.0729687	0.0515501	-1.41549	0.156925	0.43393
Cdc34	2930.17	-0.0875698	0.0704946	-1.24222	0.214155	0.512207
Atad1	2851.51	0.157703	0.0837696	1.88258	0.0597569	0.253474
Clta	2951.23	-0.0815883	0.0621153	-1.3135	0.189016	0.479632
Dld	2863.62	0.0834953	0.0769707	1.08477	0.278025	0.585237
Tpx2	2890.83	0.141839	0.130164	1.08969	0.275848	0.582391
Cnot9	2908.54	-0.00132796	0.0661695	-0.020069	0.983988	0.994313
Psap	2908.75	-0.236341	0.0702869	-3.36252	0.000772349	0.0162945
Ppp6r3	2843.73	0.1455	0.0714034	2.03772	0.0415783	0.207481
Nup93	2856.85	0.0782549	0.0652218	1.19983	0.230206	0.532137
Rnf187	2929.9	-0.15331	0.0797358	-1.92273	0.0545144	0.241092
Nudt21	2933.65	-0.0400296	0.0660521	-0.60603	0.544495	0.790198
Arhgap45	2926.95	-0.130716	0.0676468	-1.93234	0.0533179	0.238988
Cul3	2806.85	-0.109037	0.0475906	-2.29115	0.0219546	0.142423
Sltm	2887.99	0.0443372	0.0570454	0.777226	0.437025	0.723903
Seh1l	2858.04	0.0619416	0.0552184	1.12176	0.261966	0.56617
Helz2	3010.78	-0.731068	0.110571	-6.61172	3.79872e-11	3.84019e-08
Arhgef2	2847	0.187002	0.0645386	2.89752	0.00376125	0.0462755
Elp2	2857.12	0.145903	0.0552873	2.639	0.00831504	0.0777716
Ccni	2901.2	-0.182525	0.0761513	-2.39688	0.0165354	0.120204
Adh5	2858.87	0.0532191	0.0912601	0.583159	0.559786	0.79929
Taf15	2936.7	0.130336	0.0783583	1.66334	0.0962449	0.333445
Ctsb	2846.65	0.127422	0.0485188	2.62624	0.00863344	0.0797779
Trim27	2864.62	-0.175604	0.0472722	-3.71475	0.000203403	0.00642575
Sf3a3	2859.53	0.145552	0.0555982	2.61793	0.00884656	0.0809945
Dis3	2800.75	0.113721	0.0537646	2.11516	0.0344163	0.185263
Zfp91	2826.95	-0.0388438	0.0584762	-0.664267	0.506519	0.769827
Tmed10	2867.64	0.000504059	0.0515075	0.00978613	0.992192	0.99728
Pola1	2794.28	0.101606	0.0872783	1.16416	0.244359	0.546562
Mdfic	2760.33	0.26886	0.0953674	2.81921	0.00481425	0.0544284
Cdk2ap1	2905.53	0.112673	0.0761138	1.48032	0.138789	0.407663
Usp9x	2748.75	0.265069	0.0862981	3.07155	0.00212953	0.0319324
Ankrd52	2852.44	0.189334	0.0913402	2.07285	0.0381865	0.196621
Ruvbl1	2860.95	0.110989	0.0580835	1.91085	0.0560239	0.244734
Incenp	2883.38	-0.0566305	0.0952827	-0.594342	0.552283	0.794598
Snrpa	2854.95	0.00627836	0.0569035	0.110333	0.912145	0.96741
Dcun1d5	2861.01	-0.0504229	0.0934129	-0.539785	0.589345	0.814369
Pbrm1	2780.91	0.121628	0.0537226	2.264	0.0235738	0.149412
Lrp10	2861.05	0.026998	0.0568638	0.474783	0.634942	0.841801
Galnt1	2791.22	0.0224692	0.0488065	0.460373	0.645248	0.847756
Gemin5	2794.8	0.0516201	0.0634962	0.812962	0.41624	0.710376
Slc19a1	2826.67	0.00566181	0.0739919	0.0765194	0.939006	0.977668
Nfat5	2680.87	0.419306	0.109	3.84683	0.000119656	0.00452193
Efhd2	2828.75	0.0967226	0.0808348	1.19655	0.231483	0.533155
Yy1	2792.3	-0.136917	0.0491173	-2.78756	0.00531074	0.0581449
Plaa	2788.79	-0.00397961	0.0455749	-0.0873201	0.930417	0.975531
Phc2	2855.06	-0.186794	0.0958402	-1.94901	0.0512939	0.233927
Gmfb	2757.72	0.111857	0.0543169	2.05934	0.0394615	0.200862
Cox7a2	2832.8	0.0027016	0.139918	0.0193084	0.984595	0.994313
Zfp706	2794.84	-0.11141	0.0503325	-2.21348	0.0268649	0.161096
Dtl	2784.88	-0.0678216	0.0626251	-1.08298	0.278819	0.586298
Rpl3-ps1	2839.25	-0.0533152	0.0820178	-0.650044	0.515664	0.775157
Btaf1	2749.91	0.0564422	0.0805976	0.700296	0.483742	0.756807
Ik	2854.51	0.13211	0.0517446	2.55311	0.0106767	0.0916623
Usp4	2785.95	0.0690975	0.0549656	1.25711	0.208715	0.504468
Wars	2812.72	-0.141655	0.0572699	-2.47346	0.0133811	0.106604
Dnajc7	2844.74	0.20194	0.0563794	3.58181	0.000341227	0.00930208
AU020206	2811.33	-0.158795	0.0987634	-1.60783	0.107872	0.354502
Prep	2787.14	-0.052233	0.0516109	-1.01205	0.311512	0.619908
Mad2l1	2733.18	0.0299192	0.101784	0.293949	0.768797	0.903739
Ints1	2798.48	-0.157695	0.066252	-2.38023	0.0173021	0.123103
Luc7l	2760.1	0.0932102	0.0496004	1.87922	0.0602143	0.254338
Psmd4	2822.62	-0.0226089	0.0603776	-0.374458	0.708063	0.876253
Pom121	2773.38	-0.00776909	0.0860843	-0.0902497	0.928089	0.974859
Cpsf2	2754.8	0.0499611	0.056606	0.882612	0.377446	0.678291
Copg1	2784.45	0.0702975	0.0611131	1.15028	0.250027	0.553077
Eif2a	2804.88	-0.0339566	0.0559803	-0.606582	0.544128	0.790193
Ccdc88b	2808.5	0.0362126	0.0881551	0.410783	0.681232	0.863672
Nop14	2792.68	0.0300007	0.0898702	0.333822	0.738514	0.891138
Osbpl8	2724.72	0.0312097	0.0466116	0.669569	0.503133	0.768703
Traf1	2790.49	-0.0792636	0.196817	-0.402727	0.687149	0.866435
Xpo7	2713.78	0.0860342	0.0640892	1.34241	0.179462	0.467279
Dgka	2750.83	0.0840649	0.106307	0.790777	0.429074	0.719134
Gpx4	2823.29	-0.250114	0.120019	-2.08395	0.037165	0.193497
Atp5h	2751.16	-0.0723026	0.0763737	-0.946695	0.343794	0.65039
Bag1	2787.42	-0.0784117	0.0592895	-1.32252	0.185994	0.475856
Pno1	2708.88	0.156859	0.0569246	2.75556	0.00585918	0.0622397
Bptf	2772.55	-0.0425307	0.10333	-0.4116	0.680633	0.8632
Mapk6	2722.29	0.0447817	0.0798035	0.561149	0.574696	0.805632
Hnrnpr	2770.38	0.115001	0.0576198	1.99586	0.0459494	0.219367
Lamp1	2739.56	-0.13222	0.0452733	-2.92049	0.0034948	0.0442302
Jade2	2720.87	0.230903	0.108615	2.12589	0.0335126	0.182469
Nup88	2707.71	0.198083	0.0442827	4.47314	7.70802e-06	0.000679729
Coa5	2711.71	0.192321	0.0716307	2.6849	0.00725512	0.071207
Csnk1d	2764.57	0.00206895	0.0499845	0.0413919	0.966983	0.986806
Hipk3	2684.62	0.117708	0.0671946	1.75174	0.0798185	0.299962
Rfc5	2746.31	-0.0912477	0.0591363	-1.543	0.12283	0.380017
Foxk2	2742.21	-0.0182814	0.0527692	-0.346441	0.729011	0.886669
Zc3h18	2749.12	-0.0137458	0.0673212	-0.204182	0.838212	0.93657
Cish	2793.04	-0.1111	0.115875	-0.958789	0.337665	0.645683
Kmt2a	2670.56	0.0891002	0.0814352	1.09412	0.2739	0.579875
Zwint	2726.58	0.0941613	0.064466	1.46064	0.144116	0.415961
Ptk2b	2730.65	-0.014509	0.0807612	-0.179653	0.857425	0.944982
Tmem173	2757.58	-0.0213794	0.0958534	-0.223043	0.823502	0.929594
Naa25	2753.72	0.235826	0.0908437	2.59595	0.00943293	0.0843097
Smu1	2730.96	0.168035	0.0607077	2.76793	0.00564135	0.0606601
Ppp4r3a	2660.63	-0.00150085	0.0700202	-0.0214345	0.982899	0.994292
Usp36	2747.97	-0.0153501	0.0483097	-0.317744	0.750679	0.897103
Got1	2742.88	0.10625	0.0538604	1.9727	0.0485303	0.226605
Nsmce4a	2712.17	-0.00763334	0.0649642	-0.117501	0.906463	0.965537
Ero1l	2788.71	-0.27017	0.141443	-1.91009	0.056121	0.244894
Gm15500	2774.45	0.0945058	0.241293	0.391665	0.695306	0.87029
Ms4a6b	2729.54	-0.460085	0.136633	-3.36732	0.000759035	0.0161541
Cdc42se1	2742.91	0.0580916	0.070029	0.829536	0.406801	0.70388
Trnt1	2731	-0.0857449	0.086116	-0.99569	0.319401	0.627686
Mcm10	2728.73	0.0981619	0.0564996	1.73739	0.0823181	0.304963
Samm50	2750.07	0.0306878	0.0565101	0.54305	0.587095	0.813437
Usp19	2711.57	-0.0205584	0.0489356	-0.420112	0.674404	0.860796
Tbl3	2709.85	0.184724	0.0645266	2.86277	0.00419961	0.0496545
Fh1	2699.91	-0.0349556	0.0605469	-0.577331	0.563716	0.801122
Utp15	2667.51	0.203399	0.0589763	3.44882	0.000563045	0.0132627
Pold2	2725.71	-0.0066325	0.0429603	-0.154387	0.877305	0.95402
Tgoln1	2697.43	0.135363	0.0716737	1.88859	0.0589461	0.252072
Prkch	2674.19	-0.0281638	0.0997864	-0.282241	0.777758	0.908608
Cdt1	2737.41	-0.304028	0.0758243	-4.00964	6.08111e-05	0.00283591
Ilf2	2711.17	0.134358	0.0512768	2.62025	0.00878642	0.0805655
Cbl	2664.91	0.223135	0.0745151	2.9945	0.00274895	0.0374452
Tcf3	2752.3	-0.148084	0.0771414	-1.91964	0.0549033	0.242282
Dnajc9	2711.61	-0.0797547	0.0539393	-1.4786	0.139247	0.408316
Prim1	2664.89	0.0280836	0.062456	0.449654	0.65296	0.851075
Ola1	2683.99	0.0740025	0.051375	1.44044	0.149744	0.424301
Nfe2l1	2757.5	0.00299636	0.0762989	0.0392714	0.968674	0.98781
Gnl2	2656.86	0.112115	0.0483829	2.31724	0.0204904	0.136352
Ube2d2a	2677.08	-0.111862	0.0449174	-2.4904	0.0127599	0.103244
Slc29a1	2670.01	0.256618	0.09095	2.82153	0.00477949	0.0542051
Taf1	2653.6	-0.00580767	0.0735351	-0.0789782	0.93705	0.97708
Zfas1	2689.31	0.274903	0.0947505	2.90134	0.00371571	0.0459095
Uggt1	2642.22	-0.0253683	0.0637684	-0.397819	0.690764	0.868448
Oat	2662.1	0.115712	0.0534706	2.16403	0.0304619	0.173896
Bach2	2618.08	0.128362	0.0968909	1.32481	0.185233	0.475467
Epb41	2700.05	-0.0995566	0.0737709	-1.34954	0.177164	0.463785
Heatr3	2654.02	0.0938129	0.0581707	1.61272	0.106806	0.35237
Nol6	2668.73	0.080071	0.0729889	1.09703	0.272628	0.578292
Cmtm6	2662.95	-0.0717393	0.0548781	-1.30725	0.191129	0.483197
Sash3	2701.59	-0.104794	0.079799	-1.31322	0.189109	0.479632
Ldb1	2710.56	-0.0975053	0.0541646	-1.80017	0.071834	0.282103
Sf3b5	2749.24	-0.0890634	0.0766034	-1.16266	0.244969	0.547295
Espl1	2646.62	0.0602252	0.0948386	0.635028	0.52541	0.780328
Ncln	2664.11	-0.132658	0.0512123	-2.59036	0.00958754	0.0848976
Mphosph10	2633.17	0.0648476	0.09193	0.705402	0.48056	0.754595
Rtraf	2690.27	-0.0266917	0.0606038	-0.44043	0.659626	0.853262
Rbm8a	2718.51	0.0190509	0.0729022	0.261321	0.793845	0.915325
Rps16-ps2	2729.11	-0.00365468	0.0842356	-0.0433863	0.965394	0.986499
Eri1	2622.96	-0.0325562	0.0401763	-0.810334	0.417748	0.710667
Senp1	2613.87	0.0236042	0.0828176	0.285014	0.775633	0.907174
Cebpz	2596.78	0.146446	0.0492539	2.97329	0.00294624	0.0392776
Mrto4	2657.79	0.0884615	0.0653993	1.35264	0.176172	0.46242
Arpc4	2619.44	-0.179755	0.0512587	-3.50681	0.000453506	0.0114614
Hnrnpll	2558.66	0.337684	0.107897	3.12971	0.00174981	0.0278935
Uchl5	2637.33	-0.0560091	0.0795799	-0.70381	0.481551	0.754741
Thumpd1	2627.4	0.0467013	0.0737069	0.633608	0.526337	0.780948
Kmt5a	2625.69	-0.0521028	0.0640792	-0.8131	0.416161	0.710376
Dynll2	2637.4	-0.200718	0.0853915	-2.35056	0.0187452	0.12935
Erbin	2589.63	-0.0017619	0.0588401	-0.0299438	0.976112	0.991726
Lsm4	2650.54	-0.277923	0.0790063	-3.51773	0.000435257	0.0110941
Pola2	2656.95	-0.0890837	0.0520249	-1.71233	0.0868361	0.314829
Szrd1	2689.19	-0.116245	0.0734607	-1.58241	0.113556	0.364745
Selplg	2659.13	-0.172307	0.0949249	-1.81519	0.0694944	0.277315
Eps15	2592.26	0.0574513	0.0605279	0.949172	0.342533	0.649972
Cd247	2693.15	0.0965279	0.0835073	1.15592	0.247713	0.549964
Snrpd3	2686.84	-0.0158509	0.0651802	-0.243186	0.807861	0.922803
Isg20l2	2632.07	0.0802644	0.0543536	1.47671	0.139754	0.408972
Nvl	2588.9	0.105051	0.0606526	1.73202	0.0832704	0.306944
Mgea5	2623.07	-0.243762	0.0706561	-3.44998	0.000560632	0.0132627
Stoml2	2637.66	0.0851049	0.0665147	1.27949	0.200724	0.495614
Dhx30	2603.93	0.109269	0.0490947	2.22568	0.0260359	0.158476
Otulin	2630.34	-0.211616	0.0980236	-2.15883	0.0308637	0.174988
Polr1d	2678.04	0.0727642	0.0770512	0.944361	0.344985	0.650989
Cflar	2640.99	0.0569619	0.121653	0.468232	0.639619	0.844504
Wdr12	2591.2	0.19328	0.0708952	2.72628	0.00640523	0.0659609
Naa20	2609.46	-0.206863	0.115946	-1.78412	0.0744036	0.287358
Ikzf3	2724.77	-0.437278	0.245664	-1.77998	0.0750787	0.288861
Nme1	2601.37	0.0491023	0.0930536	0.527677	0.597723	0.821011
Gps1	2606.75	0.0707405	0.0620072	1.14084	0.253935	0.557352
Dtymk	2602.07	-0.105131	0.0632823	-1.66131	0.0966516	0.334274
Man1a	2593.05	-0.206306	0.0965651	-2.13645	0.0326431	0.180308
Sh3bgrl3	2647.42	-0.00218186	0.0571233	-0.0381956	0.969532	0.988479
Kif15	2536.32	0.238192	0.0701564	3.39515	0.000685904	0.0150384
Sec13	2581.21	0.034276	0.0481428	0.711966	0.476486	0.752815
Timeless	2622.04	-0.126139	0.0459711	-2.74387	0.00607202	0.063836
Eml4	2563.91	0.0597902	0.0666929	0.8965	0.369986	0.673817
Cars	2625.15	0.0788762	0.0847874	0.930281	0.352225	0.656654
Scrib	2612.88	-0.0753862	0.0641899	-1.17442	0.240225	0.542558
Tram1	2580.56	-0.175222	0.0624076	-2.80771	0.00498951	0.0557565
Tdg	2558.81	0.0487254	0.0715965	0.680555	0.496153	0.765073
Pdk1	2649.62	-0.397381	0.110566	-3.59405	0.000325582	0.00901744
Eef1e1	2560.18	0.123235	0.116569	1.05718	0.290428	0.600099
Qrich1	2543.22	0.0240251	0.0649392	0.369963	0.71141	0.87815
Ptcd3	2535.11	0.190069	0.0640456	2.96771	0.00300025	0.0397771
Clns1a	2576.96	-0.00206913	0.0493874	-0.0418958	0.966582	0.986655
Cox7b	2593.79	0.0179549	0.120953	0.148446	0.881991	0.955392
Smarcd2	2594.12	-0.0554409	0.0564714	-0.981752	0.326222	0.634846
Atp5g1	2563.24	0.0708122	0.054245	1.30542	0.191751	0.483691
Polr2e	2581.18	0.0412175	0.0608598	0.677254	0.498245	0.765999
Rrp9	2624.47	0.0107871	0.0722571	0.149288	0.881326	0.955336
Sec31a	2538.76	0.0687407	0.0816369	0.842031	0.399771	0.698591
Psmb7	2598.1	0.0766494	0.070343	1.08965	0.275867	0.582391
Oxsr1	2554.23	-0.059917	0.0605161	-0.990099	0.322126	0.630824
Drg1	2533.28	0.0139539	0.0576621	0.241994	0.808785	0.923336
Tax1bp1	2509.62	-0.0126652	0.0694044	-0.182484	0.855203	0.944273
Poldip3	2584.09	-0.0397569	0.0503145	-0.790168	0.42943	0.719333
Uqcr10	2587.83	-0.0368976	0.0915655	-0.402965	0.686974	0.866435
Cox6b1	2646.75	0.176129	0.0772599	2.2797	0.0226256	0.145146
Rab5c	2620.61	-0.0199982	0.058074	-0.344356	0.730578	0.887283
Tbl1x	2492.89	0.0662763	0.0565725	1.17153	0.241386	0.543377
Gtf2h1	2501.95	0.166762	0.0758377	2.19893	0.0278825	0.164412
Mlf2	2582.52	-0.0506799	0.0698299	-0.725762	0.467985	0.745225
Slc2a1	2634.68	-0.723668	0.138901	-5.20997	1.88872e-07	3.45122e-05
Morf4l1	2602.4	0.100837	0.0741754	1.35944	0.174009	0.45929
Hirip3	2599.91	0.0793825	0.0633199	1.25367	0.209961	0.506168
Hipk1	2504.74	0.0889827	0.0623183	1.42788	0.153328	0.428872
Pdia4	2560.23	0.0939311	0.0647514	1.45064	0.14688	0.419809
Uqcrh	2591.24	0.0697661	0.122014	0.571786	0.567467	0.802731
Brix1	2521.63	0.0311349	0.046092	0.675495	0.499362	0.766804
Ddx42	2517.86	0.0783635	0.0620287	1.26334	0.206466	0.502822
Magoh	2488.9	-0.0136364	0.124352	-0.10966	0.912679	0.967549
Ndufv2	2527.5	-0.0459738	0.117051	-0.392767	0.694492	0.870044
Usmg5	2539.12	-0.172583	0.205218	-0.840974	0.400363	0.699063
Timm23	2596.7	0.0720886	0.0931626	0.773793	0.439053	0.725338
Cfdp1	2561.82	0.104636	0.0841246	1.24382	0.213565	0.511908
Snx3	2500.19	-0.110106	0.0542422	-2.0299	0.0423671	0.209949
Cd8a	2558.06	-0.565575	0.126211	-4.48119	7.42291e-06	0.000667018
Gnpat	2510.84	0.177488	0.0575881	3.08202	0.00205601	0.0312159
Ankhd1	2506.17	0.0790186	0.068962	1.14583	0.251866	0.555323
Slc44a2	2534.53	0.0405041	0.0671516	0.603174	0.546393	0.791292
Hp1bp3	2508.17	0.0367833	0.0720808	0.510307	0.609837	0.826861
Dnajc5	2543.78	-0.0068314	0.0852747	-0.0801105	0.936149	0.977036
Eea1	2418.84	0.417356	0.0830899	5.02294	5.08858e-07	7.62094e-05
Iars2	2505.54	0.179479	0.0639335	2.80727	0.00499627	0.0557565
Ube2m	2512.24	-0.151858	0.0584251	-2.59919	0.00934435	0.0837195
Idh3b	2505.34	0.0770713	0.0610217	1.26302	0.206584	0.502822
Nedd8	2536.29	0.0144153	0.0759192	0.189877	0.849405	0.941533
Ehmt2	2563.76	-0.0337031	0.0604672	-0.557378	0.577269	0.806966
Add1	2537	-0.0693308	0.0659054	-1.05197	0.292811	0.602363
Usp39	2499.58	0.00860667	0.0617656	0.139344	0.889178	0.959196
Mtch2	2497.63	0.173317	0.0534092	3.24508	0.00117417	0.0215817
Kntc1	2470.9	0.161718	0.0930282	1.73837	0.0821448	0.304646
Sp3	2466.9	0.0519649	0.0682187	0.76174	0.446215	0.731426
Nploc4	2506.97	-0.0571344	0.0698384	-0.818094	0.413303	0.708113
Adrm1	2542.19	-0.0827874	0.0492783	-1.68	0.0929579	0.326767
Eif2b5	2512.29	0.0409798	0.0419805	0.976163	0.328984	0.637002
Sipa1	2545.7	-0.0608156	0.0530712	-1.14593	0.251826	0.555323
Ugcg	2499.78	-0.0843815	0.080004	-1.05472	0.291556	0.601405
Pold3	2495.04	-0.0893249	0.0468371	-1.90714	0.0565027	0.245411
Pwp1	2492.06	0.143897	0.0518953	2.77282	0.00555724	0.0601382
Atp11a	2438.73	0.0360627	0.115721	0.311635	0.755318	0.899015
Zfr	2471.26	0.0299026	0.0596514	0.50129	0.616167	0.829273
Bmi1	2429.26	0.0685187	0.0855338	0.801071	0.423091	0.714437
Birc3	2509.61	-0.000478091	0.0849611	-0.00562717	0.99551	0.998143
Tomm22	2480.64	0.0762843	0.0598366	1.27488	0.202353	0.497516
Wdhd1	2506.58	0.0444369	0.0474747	0.936012	0.349267	0.65426
Gm9616	2509.89	0.149358	0.0906154	1.64826	0.0992989	0.339242
Rad51	2525.63	0.0583749	0.0738189	0.790785	0.429069	0.719134
Ndufa10	2474.36	0.0339467	0.0532462	0.637542	0.523772	0.779808
Zc3h4	2516.85	-0.0415168	0.0939716	-0.441802	0.658633	0.852796
Rsrc2	2496.47	0.065252	0.0651021	1.0023	0.316197	0.624396
Gfm1	2487.68	0.0934455	0.0568777	1.64292	0.1004	0.3404
Tma7	2485.83	0.0242277	0.068622	0.35306	0.724044	0.884084
Lag3	2539.27	-0.248145	0.0978948	-2.53481	0.0112507	0.0950015
Mia2	2458.38	0.0206506	0.064047	0.32243	0.747127	0.89577
Chd8	2459.74	0.0716335	0.0703114	1.0188	0.308296	0.618479
Usp5	2499.95	-0.00523187	0.0501654	-0.104293	0.916937	0.969939
Itsn2	2458.9	0.0628248	0.0547711	1.14704	0.251363	0.55482
Ppip5k2	2400.94	0.267699	0.0901754	2.96865	0.00299109	0.0396991
Arfgef1	2437.06	-0.0260569	0.0695116	-0.374857	0.707767	0.876139
Asxl1	2492.24	-0.139667	0.101822	-1.37168	0.170164	0.453984
Chchd3	2495.42	0.0575364	0.0589694	0.975699	0.329214	0.637002
Ubqln4	2464.86	-0.0217467	0.0585954	-0.371133	0.710539	0.87815
Rpl6l	2467.89	0.0541113	0.0591711	0.914489	0.36046	0.664954
Thoc2	2398.06	0.218096	0.0573667	3.80179	0.000143653	0.00509548
Manf	2511.69	-0.134998	0.0808734	-1.66925	0.0950686	0.331116
Vdac3	2452.26	-0.0528396	0.0648219	-0.81515	0.414986	0.709942
Ssr2	2497.2	0.00740036	0.060547	0.122225	0.902721	0.96408
Atp2a3	2471.94	0.212841	0.0667559	3.18835	0.00143085	0.0245026
Ube2l3	2442.4	0.105519	0.0432228	2.44128	0.0146353	0.111942
Safb2	2511.82	-0.110756	0.0714724	-1.54963	0.12123	0.377542
Cic	2524.12	-0.264849	0.070066	-3.77999	0.000156833	0.00531436
Ddx54	2477.36	-0.146685	0.055357	-2.6498	0.00805402	0.0761522
Rlim	2459.51	0.0641894	0.0547441	1.17254	0.240982	0.542971
Prdx2	2445.31	0.184313	0.0527951	3.4911	0.000481032	0.012007
Rbm5	2428.25	0.053791	0.0557673	0.964562	0.334764	0.642975
Trim30a	2670.88	-1.11253	0.245588	-4.53005	5.89686e-06	0.00057759
Csnk2b	2457.54	-0.121799	0.0595417	-2.0456	0.0407959	0.205265
Pdhb	2404.3	0.0282309	0.0532935	0.529726	0.596302	0.820152
Rpl22l1	2571.12	0.0253961	0.199014	0.12761	0.898458	0.962556
Cops5	2452.49	0.108292	0.0800873	1.35218	0.176318	0.462569
Rela	2466.92	-0.161623	0.0556533	-2.90411	0.00368298	0.0457702
Dhcr24	2463.41	-0.434623	0.0683364	-6.36004	2.01698e-10	1.28779e-07
Elob	2476.26	0.0236637	0.0639651	0.369947	0.711422	0.87815
Ubr2	2448	0.0559138	0.0718777	0.777902	0.436627	0.723683
Trmt1	2439.84	-0.0340772	0.0632466	-0.538799	0.590025	0.815216
Tox4	2463.97	0.117811	0.0566042	2.08132	0.0374047	0.194328
Zfp598	2469.36	-0.0437849	0.0620993	-0.705079	0.480761	0.754595
Ccnl1	2418.73	-0.115931	0.0785341	-1.47619	0.139893	0.409109
Farsa	2485.84	-0.00809166	0.0508451	-0.159143	0.873556	0.952635
Rap1gds1	2445.99	-0.251965	0.09525	-2.6453	0.00816186	0.0769918
Sf3b6	2444.89	-0.0312625	0.119357	-0.261924	0.79338	0.915099
Atp8b2	2435.78	0.131731	0.0572493	2.301	0.0213914	0.139741
Atp5j	2415.05	-0.133868	0.0909037	-1.47263	0.140851	0.410759
Efr3a	2393.83	0.0814896	0.0683753	1.1918	0.23334	0.535752
Virma	2422.04	0.0948241	0.0708893	1.33764	0.181015	0.468707
Sec23b	2411.64	0.18429	0.0603985	3.05123	0.00227905	0.03335
Minos1	2377.11	0.0296891	0.0984323	0.30162	0.762942	0.901544
Racgap1	2407.01	-0.1027	0.11149	-0.921157	0.356969	0.661105
Zfp445	2404.26	0.167957	0.0417022	4.02755	5.63612e-05	0.00268125
Tmod3	2419.19	-0.114942	0.0552697	-2.07966	0.0375567	0.194868
Rexo2	2396.82	-0.0924343	0.0540732	-1.70943	0.0873713	0.315635
Cers2	2439.84	0.0653142	0.048334	1.35131	0.176596	0.462897
Icos	2382.81	0.114729	0.0597095	1.92145	0.0546753	0.241715
Tcf20	2424.47	-0.0741289	0.0742717	-0.998077	0.318242	0.626618
Pafah1b2	2402.81	0.104275	0.0685495	1.52117	0.128218	0.389437
Zdhhc5	2427.06	-0.0229029	0.0787161	-0.290956	0.771085	0.904562
Sart1	2461.33	-0.182699	0.0567545	-3.2191	0.00128591	0.0226918
Insig1	2471.89	-0.516038	0.0682424	-7.56185	3.9738e-14	9.64123e-11
Metap1	2357.1	0.303589	0.0520158	5.83648	5.33144e-09	1.98459e-06
Vav1	2438.83	0.00892243	0.0457149	0.195176	0.845255	0.939833
Snrnp40	2442.88	0.0337627	0.0467027	0.722929	0.469724	0.746818
Akr1b3	2380.06	0.21497	0.0974786	2.2053	0.0274329	0.163211
Nup214	2392.92	0.0765241	0.0821888	0.931077	0.351814	0.656189
Dcaf1	2383.02	0.121469	0.0560525	2.16706	0.0302301	0.173309
Tmed7	2387.6	-0.0774767	0.0623529	-1.24255	0.214033	0.512132
Bub1b	2409.75	0.193304	0.107696	1.79491	0.0726675	0.284181
Amfr	2408.61	-0.0864566	0.0536731	-1.6108	0.107224	0.353189
Kdm5c	2412.8	0.0805429	0.076029	1.05937	0.289431	0.598752
Ttc39b	2314.92	0.279566	0.0737905	3.78864	0.000151473	0.00522023
Rrs1	2405.16	-0.0423954	0.074112	-0.572046	0.567291	0.802731
Psmb5	2429.17	-0.000887923	0.0690724	-0.012855	0.989744	0.996479
Acp1	2410.04	0.110891	0.0853478	1.29928	0.193847	0.485859
Med14	2303.77	0.386464	0.0863138	4.47743	7.55458e-06	0.000673858
Stard4	2437.7	-0.369016	0.0638273	-5.78148	7.4046e-09	2.64192e-06
Pi4ka	2381.48	-0.0201002	0.0555793	-0.361648	0.717615	0.880399
Slc20a1	2367.92	0.0148188	0.074904	0.197837	0.843173	0.939518
Tnpo2	2391.16	0.113554	0.0828351	1.37084	0.170425	0.454378
Rilpl2	2388.37	0.222142	0.108033	2.05624	0.0397597	0.201473
Ikbkap	2364.36	0.160549	0.0781234	2.05507	0.0398721	0.201873
Trir	2416.67	-0.0898474	0.0675066	-1.33094	0.183208	0.472269
Gpbp1	2329.58	-0.0086826	0.0760425	-0.114181	0.909094	0.966174
Paxip1	2376.87	-0.0908162	0.0527665	-1.7211	0.0852336	0.311718
Actr1a	2400.95	0.00478221	0.0603983	0.0791778	0.936891	0.97708
1110004F10Rik	2409.66	0.0719027	0.0492385	1.46029	0.144209	0.416128
Tnrc6a	2365.38	0.0505034	0.0728727	0.693036	0.488287	0.758754
2410002F23Rik	2390.6	0.143168	0.0767648	1.86502	0.062178	0.259474
Ddx47	2385.73	0.1075	0.0620329	1.73296	0.0831034	0.306523
Ranbp3	2404.07	0.00454011	0.0546524	0.0830725	0.933794	0.976623
Mga	2350.25	0.0812952	0.0652283	1.24632	0.212648	0.510515
Tmem259	2435.96	-0.123792	0.0694342	-1.78286	0.0746084	0.287965
Acap1	2379.26	0.0210983	0.0519319	0.40627	0.684544	0.864986
Adipor2	2401.09	-0.1944	0.0619482	-3.13811	0.00170041	0.027394
Traf7	2391	-0.0273128	0.0504283	-0.541618	0.588082	0.813836
Map3k7	2279.39	0.129621	0.0825412	1.57038	0.116327	0.369319
Map4	2381.61	-0.0299994	0.06423	-0.467062	0.640455	0.845139
Usp14	2304.43	0.213313	0.0493912	4.31884	1.5685e-05	0.0010811
Map4k4	2343.28	0.15076	0.0743835	2.02679	0.0426836	0.210742
Cdk2	2368.93	0.0287835	0.0584575	0.492383	0.622449	0.833833
Cinp	2372.99	0.0584619	0.0526976	1.10938	0.267265	0.572021
Nek7	2293.48	0.323377	0.0776193	4.1662	3.09721e-05	0.00173311
Thop1	2380.61	-0.0654357	0.0645574	-1.0136	0.310771	0.619563
Lap3	2350.93	0.0189195	0.063061	0.30002	0.764162	0.902019
Rcl1	2358	0.116658	0.058625	1.98991	0.0466012	0.221095
Rpf2	2314.14	0.161334	0.0823182	1.95988	0.0500093	0.230233
Ncapg	2308.43	0.231473	0.0612213	3.78092	0.000156248	0.00530937
Anxa6	2310.96	0.251744	0.0767603	3.27961	0.00103952	0.0197966
Blmh	2296.51	0.208472	0.0578281	3.60503	0.000312113	0.00876103
Trpc4ap	2366.82	-0.163193	0.061358	-2.65968	0.00782145	0.0748281
Utp18	2324.89	0.0942347	0.0703464	1.33958	0.180381	0.468264
Med12	2300.12	0.140689	0.0909918	1.54617	0.122064	0.378746
Fkbp3	2326.61	-0.0264763	0.0984041	-0.269057	0.787886	0.912483
Aurkb	2349.75	-0.0713117	0.0852016	-0.836976	0.402606	0.7
Sfi1	2329.89	0.403353	0.205235	1.96533	0.0493765	0.228584
Impdh2-ps	2356.25	-0.148591	0.058733	-2.52995	0.011408	0.0959651
Ly9	2377.72	-0.0691754	0.0773899	-0.893856	0.371399	0.674358
Tial1	2334.38	-0.0201647	0.0489211	-0.412188	0.680202	0.863151
Gramd1a	2317.36	0.127799	0.0714654	1.78827	0.0737332	0.286351
Pole4	2330.98	-0.102233	0.109376	-0.93469	0.349948	0.654361
Cdk17	2285.94	0.0857334	0.0659415	1.30014	0.193552	0.485221
Rps2-ps13	2311.02	-0.0127287	0.0776227	-0.163982	0.869745	0.95084
Zc3h14	2291.12	0.162338	0.0488144	3.32561	0.000882251	0.0176902
Zzz3	2270.12	0.112252	0.0651264	1.7236	0.0847798	0.310714
Slc35e1	2315.13	-0.100691	0.0609855	-1.65107	0.0987244	0.338407
Lta4h	2307.93	0.0783466	0.0553943	1.41434	0.157261	0.434464
AI662270	2339.19	0.0512957	0.0703253	0.729406	0.465753	0.744015
Rock1	2250.87	0.0864675	0.0465134	1.85898	0.0630299	0.261675
Cdca4	2308.37	0.0885006	0.0623714	1.41893	0.155919	0.43232
Nmd3	2297.44	0.142896	0.0896724	1.59354	0.11104	0.360173
Orc3	2287.54	0.109151	0.0571981	1.90829	0.0563539	0.245351
Cops7a	2314.22	0.079747	0.061161	1.30389	0.192272	0.483912
Map2k2	2348.38	-0.155918	0.0585757	-2.66182	0.00777184	0.0744709
Acot7	2307.2	0.0847512	0.0621302	1.36409	0.172539	0.457401
Rnf20	2304.82	0.220035	0.052715	4.17405	2.99229e-05	0.00169624
Birc5	2275.84	-0.0170953	0.0910685	-0.18772	0.851097	0.942761
Tle3	2329.13	0.169623	0.0837495	2.02536	0.0428301	0.211235
Rae1	2340.75	0.00438341	0.0520749	0.0841751	0.932917	0.976213
Srp9	2319.14	-0.191854	0.128303	-1.49532	0.134832	0.400403
Nktr	2279.07	0.20194	0.0620692	3.25347	0.00114005	0.0210501
Nsd3	2338.9	-0.221952	0.0913375	-2.43002	0.0150981	0.11369
Imp4	2310.99	0.226639	0.0694376	3.26393	0.00109879	0.0205384
Piezo1	2287.39	0.040792	0.0853141	0.478139	0.632551	0.839733
Senp6	2275.21	0.093915	0.052499	1.78889	0.0736326	0.286293
Ostc	2307.49	-0.0458167	0.0750733	-0.610293	0.541668	0.788604
Rpa2	2326.48	0.0142147	0.0664821	0.213813	0.830693	0.932932
Idh3g	2270.95	0.00686403	0.0440017	0.155995	0.876037	0.953509
Arglu1	2291.44	-0.0489301	0.0630825	-0.775652	0.437954	0.724468
Phf5a	2276.97	0.0118824	0.061617	0.192842	0.847083	0.940333
Usp10	2278.27	-0.00335705	0.0542962	-0.0618285	0.950699	0.982205
Dnajb6	2317.13	-0.139304	0.0638927	-2.18028	0.029237	0.169193
Naa40	2285.64	0.051585	0.0855428	0.603032	0.546488	0.791292
Xcl1	2227.54	0.555785	0.355213	1.56465	0.117665	0.37161
Mier1	2250.81	-0.0178373	0.0611661	-0.29162	0.770577	0.904487
Gm9800	2391.32	0.0031736	0.0922233	0.0344121	0.972549	0.990179
Sidt2	2274.08	-0.0758518	0.0695592	-1.09047	0.275508	0.581959
Aaas	2274.83	0.0291319	0.0717755	0.405875	0.684834	0.86505
Wac	2241.25	0.0312476	0.0580478	0.538308	0.590364	0.815591
Clk1	2270.57	-0.111256	0.0730047	-1.52395	0.127521	0.38839
Wdr5	2284.33	0.0415381	0.0633028	0.656182	0.511707	0.772458
Ppil1	2300.83	-0.0409289	0.0720448	-0.568104	0.569965	0.803048
Mettl16	2282.86	0.242214	0.057067	4.24438	2.19194e-05	0.00136493
Exosc8	2297.5	0.000231738	0.0712145	0.00325408	0.997404	0.999073
Sart3	2299.28	0.0441845	0.068861	0.641648	0.521102	0.778413
Evl	2303.49	-0.136054	0.0767293	-1.77317	0.076201	0.291239
Ddx56	2263.18	0.0359003	0.0529396	0.678136	0.497685	0.765553
Dnajc3	2259.29	-0.0461463	0.0541602	-0.852034	0.394195	0.693024
Ube2c	2213.3	0.0331337	0.19822	0.167157	0.867247	0.950406
Rtel1	2270.24	0.135345	0.0607329	2.22853	0.0258453	0.157677
Cd2	2342.15	-0.244066	0.113506	-2.15024	0.0315359	0.177023
Rrn3	2225.9	0.076868	0.0612701	1.25458	0.209633	0.505752
Agps	2237.25	0.0430917	0.0455769	0.945472	0.344418	0.650989
Nop16	2267.57	0.145361	0.0705441	2.06056	0.0393447	0.200542
Ppp2r1b	2245.52	0.184059	0.0716365	2.56935	0.0101889	0.0888583
Ndufs1	2263.47	0.195643	0.0607137	3.22239	0.00127125	0.0225461
Imp3	2311.64	0.116858	0.0793283	1.47309	0.140728	0.410574
Dpp8	2221.37	0.132393	0.0677719	1.95352	0.0507584	0.232359
Zdhhc18	2286.5	-0.141425	0.0692853	-2.04119	0.0412317	0.206431
Nsfl1c	2319.15	-0.0123448	0.0863432	-0.142974	0.886311	0.957762
Sf3a2	2305.45	-0.158448	0.0640123	-2.47527	0.0133134	0.106393
Nudcd2	2244.39	-0.0617321	0.0890772	-0.693018	0.488298	0.758754
Slk	2247.56	0.076744	0.0592226	1.29586	0.195025	0.487703
Capns1	2271.77	-0.0183771	0.0562501	-0.326703	0.743892	0.894304
Ppp1r16b	2267.7	0.174471	0.0551377	3.16428	0.00155467	0.0256246
Sumo3	2266.04	0.0261965	0.0743616	0.352285	0.724624	0.884346
Nf2	2278.64	0.0540322	0.0782403	0.690593	0.489821	0.760285
Pwp2	2244.16	0.207257	0.0797312	2.59945	0.0093374	0.0837191
Gm13835	2242	-0.0730367	0.123442	-0.591669	0.554072	0.795628
Eif1ad	2261.98	0.0910669	0.0708014	1.28623	0.198363	0.492698
Dnajc11	2260.95	0.17196	0.0510617	3.36769	0.000757996	0.0161541
Ncapd3	2223.39	0.0813731	0.0895275	0.908917	0.363394	0.66834
Fam162a	2308.35	-0.352996	0.086459	-4.08281	4.44937e-05	0.00224986
Hnrnph2	2284.23	-0.0282029	0.0807401	-0.349305	0.72686	0.885295
Gpat4	2230.57	0.00129807	0.0579971	0.0223816	0.982144	0.994085
Nptn	2239.16	-0.0471275	0.0976129	-0.4828	0.629238	0.837994
Cpsf3	2231.86	0.176433	0.067315	2.621	0.00876725	0.0805501
Rnf145	2251.16	-0.12069	0.0495069	-2.43785	0.014775	0.112233
Wdr33	2260.33	-0.049165	0.0497581	-0.988079	0.323114	0.631364
Dhfr	2252.21	-0.148417	0.0931938	-1.59256	0.111258	0.360519
Taldo1	2281.4	-0.101579	0.0692538	-1.46677	0.142439	0.413098
Ppp4r2	2227.02	-0.0471238	0.0619569	-0.76059	0.446902	0.731925
Bcl11b	2222.83	0.0878515	0.0954401	0.920488	0.357318	0.661105
Abcb1b	2148.03	0.0660357	0.110295	0.598719	0.54936	0.792896
Srp68	2258.43	0.0851019	0.0713816	1.19221	0.233178	0.535635
Gtpbp1	2262.26	0.0498914	0.0552205	0.903495	0.366263	0.670775
Arf4	2279.82	-0.145458	0.057419	-2.53327	0.0113003	0.0951518
Fabp5	2277.97	0.0364997	0.0631898	0.57762	0.563521	0.801039
Ier2	2213.61	-0.054846	0.0894052	-0.613455	0.539576	0.788011
Smarcc2	2233.76	0.0635366	0.0601076	1.05705	0.290489	0.600124
H2afx	2256.15	-0.0244444	0.0778871	-0.313844	0.753639	0.898516
Dnm2	2260.73	-0.20067	0.0522901	-3.83764	0.000124224	0.00463679
Stk26	2161.36	0.138548	0.0895445	1.54726	0.121802	0.378564
Med1	2235.88	0.115575	0.0671107	1.72215	0.0850423	0.311394
Flii	2214.16	-0.0113232	0.0522854	-0.216565	0.828547	0.931935
Prkcq	2223.72	-0.210576	0.0983652	-2.14076	0.0322932	0.179454
Clptm1	2232.62	-0.115242	0.0490803	-2.34803	0.0188728	0.129879
Cops6	2269.67	-0.0512827	0.0635956	-0.806388	0.420019	0.711628
Csnk1g2	2267.17	-0.373193	0.0708348	-5.26849	1.37548e-07	2.69129e-05
Sugt1	2240.97	-0.0622021	0.0747098	-0.832582	0.40508	0.702406
Ccl4	2127.86	0.498656	0.286655	1.73956	0.0819355	0.304215
Dnajb11	2256.24	-0.111307	0.0711557	-1.56428	0.117752	0.37161
Zdhhc3	2219.33	0.105439	0.0586438	1.79795	0.0721848	0.282658
Tab2	2205.48	0.00225787	0.0791178	0.028538	0.977233	0.992035
Senp2	2182.61	0.0747105	0.0642056	1.16361	0.24458	0.546812
Rabl6	2225.46	-0.0992469	0.0529451	-1.87452	0.0608581	0.255996
Tet3	2228.2	0.0853765	0.0862425	0.989959	0.322194	0.630824
Swi5	2248.35	-0.0590504	0.0794725	-0.743029	0.457464	0.740791
Nans	2246.93	-0.0898504	0.0462449	-1.94293	0.0520251	0.235687
Mrpl12	2262.72	-0.0456995	0.0913688	-0.500166	0.616958	0.830023
Copz1	2244.52	0.046064	0.063338	0.727273	0.467059	0.744434
Mtap	2164.77	0.109737	0.0607039	1.80774	0.0706467	0.279796
Ppp3cb	2163.34	0.0135109	0.0504045	0.268049	0.788662	0.912819
Gm6863	2263.84	0.0977079	0.0819948	1.19164	0.233404	0.535752
Rassf5	2191.49	0.185583	0.0686744	2.70235	0.00688505	0.069045
Ccdc47	2205.74	0.0455133	0.0791232	0.575221	0.565142	0.801747
Tsr1	2200.38	0.280647	0.0705947	3.97547	7.02418e-05	0.0031186
Gak	2211.93	-0.00955698	0.0566477	-0.168709	0.866026	0.94963
Hnrnpa3	2184.55	0.166796	0.0578279	2.88435	0.00392226	0.0473484
Orc2	2163.5	0.0770189	0.0560015	1.3753	0.169038	0.452794
Zmynd19	2220.28	0.0237289	0.0637994	0.371931	0.709944	0.877638
Tbx21	2246.07	-0.130204	0.0701624	-1.85575	0.0634885	0.262757
Etv6	2218.34	-0.32977	0.0831485	-3.96604	7.30771e-05	0.00320035
Tmed9	2232.46	-0.0254114	0.0728238	-0.348943	0.727132	0.885448
Suclg1	2206.52	-0.0783071	0.0722587	-1.0837	0.278496	0.58572
Snhg6	2133.85	0.0565329	0.132921	0.425313	0.670609	0.859408
Rnf126	2242.1	-0.22292	0.0500574	-4.4533	8.45614e-06	0.000705845
Zmpste24	2150.63	0.181518	0.0763845	2.37637	0.0174837	0.123887
Tmem131	2177.74	0.0305312	0.0785608	0.388632	0.697549	0.870972
Prmt7	2177.53	0.132766	0.0619722	2.14236	0.0321648	0.178987
Rab1a	2177.2	-0.140834	0.0463446	-3.03883	0.00237498	0.0342309
Dock11	2129.58	0.147969	0.102097	1.44929	0.147256	0.420502
Ltv1	2167.09	0.224064	0.0624077	3.59033	0.000330257	0.00912607
Fam136a	2192.82	0.115788	0.077588	1.49234	0.135609	0.402119
Glipr2	2205.57	-0.292717	0.138619	-2.11166	0.0347156	0.185685
Arf5	2219.62	-0.310093	0.0796007	-3.89561	9.79526e-05	0.00398431
Nudt5	2168.87	0.162921	0.0534483	3.0482	0.00230216	0.0334341
Dr1	2141.68	0.0311373	0.0766491	0.406232	0.684572	0.864986
Afg3l2	2195.09	-0.0230318	0.0632907	-0.363905	0.715929	0.879668
Ogfr	2238.56	-0.134588	0.0715353	-1.88142	0.0599145	0.25369
Phf10	2183.35	-0.013199	0.0787915	-0.167518	0.866962	0.950228
Slc38a10	2167.33	-0.11436	0.0576442	-1.98389	0.0472683	0.222768
Tm9sf2	2161.06	-0.0518313	0.0473877	-1.09377	0.274055	0.580101
Gm11808	2264.52	-0.119034	0.0826624	-1.44	0.149867	0.424301
Phrf1	2178.53	-0.130575	0.0693622	-1.88251	0.0597664	0.253474
Msl2	2125.26	-0.00869654	0.056239	-0.154635	0.877109	0.95402
Cd3g	2160.11	0.147094	0.11401	1.29019	0.196985	0.490463
Tacc3	2166.89	0.0765963	0.0728702	1.05113	0.293198	0.602774
Rmnd5a	2148.93	-0.0186007	0.0635628	-0.292635	0.769801	0.904276
Bax	2160.88	-0.197121	0.0862361	-2.28583	0.0222644	0.143588
Snhg5	2139.19	0.357464	0.099977	3.57546	0.000349611	0.009488
Trmt6	2143.29	0.21075	0.0616701	3.41738	0.000632278	0.0142677
Snrpb2	2166.86	0.0314841	0.105371	0.298793	0.765098	0.902597
Msi2	2156.23	0.0867934	0.0652511	1.33015	0.18347	0.472744
Phip	2184.51	-0.0238096	0.121763	-0.195541	0.84497	0.939833
Ppif	2147.22	-0.00988819	0.0712133	-0.138853	0.889566	0.959196
Trpm7	2092.74	0.157323	0.0803563	1.95781	0.0502521	0.230912
Cdkn2aipnl	2130.64	-0.0883769	0.0697012	-1.26794	0.20482	0.501003
Gm2000	2234.56	0.0972435	0.150891	0.644462	0.519276	0.777208
Eloc	2175.43	0.0812687	0.0949064	0.856304	0.39183	0.690785
Rps6ka1	2128.52	-0.12224	0.0580258	-2.10664	0.0351488	0.187507
Sh3glb1	2155.93	-0.18666	0.0561772	-3.3227	0.000891511	0.0178464
Traf6	2127.02	0.180547	0.0811952	2.22362	0.0261741	0.159121
Herc1	2133.08	0.19386	0.0601343	3.22379	0.00126506	0.0224956
Hsd17b12	2152.44	-0.118348	0.0777111	-1.52292	0.127778	0.388794
Nemf	2154.41	0.112334	0.0604501	1.85828	0.0631286	0.261761
Snrpa1	2168	-0.168767	0.0696177	-2.42419	0.0153425	0.115173
Parp14	2235.97	-0.603721	0.12998	-4.64472	3.40538e-06	0.000382506
Cnot10	2140.16	0.178072	0.0671722	2.65098	0.00802592	0.0759457
Cdc25a	2144.74	-0.011568	0.0622715	-0.185768	0.852627	0.943466
Cox7a2l	2151.82	-0.0359104	0.0567094	-0.633236	0.52658	0.780948
Ndufv1	2177.98	0.0745276	0.0565945	1.31687	0.187882	0.478121
Ppp3r1	2124.37	0.0633606	0.0575629	1.10072	0.271018	0.576996
Park7	2187.48	0.0785538	0.0696386	1.12802	0.259311	0.563341
Dcp2	2130.49	-0.00788158	0.0588053	-0.134028	0.89338	0.960529
Derl1	2203.6	-0.0224107	0.052303	-0.428478	0.668303	0.858135
Adipor1	2147.13	-0.0465842	0.0507319	-0.918244	0.358491	0.662733
Ltn1	2114.52	0.150727	0.0719268	2.09556	0.0361215	0.190434
Iws1	2121.05	0.0382557	0.0475027	0.805337	0.420625	0.711859
Akap13	2123.01	-0.0982941	0.0784625	-1.25275	0.210296	0.506471
Mrpl30	2157.3	0.00191038	0.0963666	0.0198241	0.984184	0.994313
Tmem30a	2084.43	0.0378503	0.059672	0.634306	0.525881	0.780649
Dnajc13	2099.42	0.0528733	0.0652957	0.809752	0.418083	0.710667
Fmr1	2112.22	-0.00198595	0.070532	-0.0281568	0.977537	0.992036
Rab8a	2176.89	0.013963	0.0608246	0.229562	0.818432	0.927206
Ppp1r12a	2122.61	-0.00307706	0.059628	-0.0516043	0.958844	0.985115
Fxr1	2149.44	0.138207	0.0578842	2.38764	0.0169569	0.121718
Napa	2143.48	-0.0546859	0.0532459	-1.02704	0.3044	0.614013
Igf2r	2070.5	0.144023	0.108653	1.32553	0.184996	0.47515
Stag1	2080.57	0.0178883	0.0503073	0.355581	0.722155	0.883378
Ssr4	2156.76	0.0747952	0.0986356	0.758298	0.448273	0.732658
Rock2	2101.18	0.143933	0.0574847	2.50384	0.0122853	0.100562
Tapbpl	2159.97	-0.333169	0.0750696	-4.43814	9.07402e-06	0.000734
Mllt3	2124.26	-0.122269	0.120217	-1.01707	0.309122	0.618825
Sdcbp	2137.87	0.0418503	0.0902315	0.46381	0.642784	0.846444
Gnl3l	2106.28	0.257164	0.0674273	3.81395	0.000136763	0.00495244
Cndp2	2149.03	-0.0557709	0.056198	-0.9924	0.321002	0.629397
4932438A13Rik	2089.85	0.0356267	0.0979315	0.363792	0.716013	0.879679
Carmil2	2155.85	-0.133662	0.0691703	-1.93237	0.0533142	0.238988
Arhgef3	2075.15	0.25759	0.14375	1.79193	0.0731442	0.285433
Smpd4	2109.46	0.0865626	0.067662	1.27934	0.200778	0.495614
Stk24	2122.19	-0.0621728	0.0566721	-1.09706	0.272615	0.578292
Ikbkb	2118.21	0.0991466	0.0582855	1.70105	0.0889336	0.318622
Fbxw11	2111.38	0.148581	0.0609223	2.43887	0.0147334	0.11201
Nipbl	2075.52	0.0997605	0.0579439	1.72167	0.0851288	0.311617
Abca2	2122.02	-0.0612347	0.09083	-0.674168	0.500204	0.767217
Zfp62	2071.53	-0.0066261	0.0703288	-0.0942161	0.924938	0.973022
Mtf2	2084.89	0.110798	0.0615078	1.80136	0.0716458	0.28169
Cdc6	2137.78	-0.0658003	0.0668488	-0.984315	0.324961	0.633167
Ints3	2116.16	0.0816685	0.0866219	0.942815	0.345775	0.651098
Elf1	2111.19	-0.112966	0.0803939	-1.40515	0.159977	0.438688
Nup133	2109.66	0.0302488	0.0560006	0.540151	0.589093	0.814206
Cnot2	2117.58	0.219763	0.0609955	3.60293	0.000314647	0.00877468
Bap1	2126.09	0.0111194	0.0574624	0.193507	0.846562	0.940333
Wsb1	2091.26	-0.00285091	0.060348	-0.0472411	0.962321	0.985969
Heg1	2102.08	0.361947	0.099957	3.62103	0.000293438	0.00846299
Eif4e2	2132.44	-0.0376609	0.0490824	-0.7673	0.442903	0.729117
Prps2	2103.38	0.0864259	0.058007	1.48992	0.136245	0.403315
Mpp6	2101.24	-0.0843229	0.0485869	-1.73551	0.0826513	0.305684
Ankfy1	2101.95	0.162664	0.0623366	2.60945	0.00906885	0.0819628
Gtf3c1	2079.32	0.121265	0.0750721	1.61532	0.106241	0.351176
Cyld	2106.56	0.0560881	0.0644714	0.869968	0.384318	0.683902
Pmpca	2089.55	0.104711	0.0466455	2.24482	0.0247794	0.154391
Ube2z	2143.09	-0.254731	0.0543917	-4.68327	2.82332e-06	0.000326188
Cops4	2102.15	0.162081	0.0499131	3.24726	0.00116523	0.0214824
Rad50	2095.85	-0.0358772	0.0661758	-0.54215	0.587715	0.813693
Tecr	2159.29	-0.0553555	0.0526338	-1.05171	0.292933	0.602503
Aimp1	2111.11	-0.0340091	0.0567489	-0.599292	0.548978	0.792715
Adk	2093.47	0.0599423	0.104818	0.571871	0.56741	0.802731
Irak1	2096.48	-0.0601487	0.0635242	-0.946862	0.343709	0.65039
Ggnbp2	2103.03	-0.0780237	0.0541106	-1.44193	0.149322	0.423725
Dhx16	2117.17	-0.180924	0.0574193	-3.15092	0.00162755	0.0265405
Arl8b	2071.12	0.0116995	0.0539797	0.216738	0.828412	0.931887
Orc6	2099.29	0.0502147	0.0891166	0.563472	0.573114	0.804829
Selenoh	2142.05	0.140407	0.0739742	1.89805	0.057689	0.248441
1700020I14Rik	2113.8	-0.0499834	0.0546729	-0.914225	0.360599	0.665008
Ythdf1	2117.87	0.0460048	0.0492463	0.934178	0.350212	0.654376
Nob1	2134.9	0.150238	0.0526363	2.85427	0.00431365	0.0507063
Gm7964	2061.08	0.0452744	0.0720209	0.628629	0.529592	0.783282
Zfp638	2061.94	0.102489	0.099968	1.02522	0.30526	0.615233
Phf20l1	2042.21	0.072306	0.0718149	1.00684	0.314012	0.622737
Golph3	2067.08	0.150198	0.0586305	2.56177	0.010414	0.0900447
Cbx1	2118.28	0.0824863	0.0554528	1.4875	0.136882	0.404313
Klf6	2068.9	-0.291921	0.149857	-1.94799	0.051416	0.234308
Tor1aip2	2106.03	-0.163065	0.0610784	-2.66977	0.0075903	0.0731939
Cdc45	2102.84	0.0282567	0.0476825	0.592601	0.553448	0.795154
Atp5l	2103.82	-0.0443128	0.124929	-0.354703	0.722812	0.883612
Dcaf8	2110.48	0.0513152	0.0509241	1.00768	0.313608	0.622257
Ctsz	2183.4	-0.0663537	0.254365	-0.26086	0.794201	0.915648
Stk11	2139.27	-0.223442	0.0649098	-3.44235	0.000576693	0.0134536
Ube3a	2027.53	0.059487	0.0724683	0.820869	0.411721	0.707486
Vim	2013.58	0.234651	0.310648	0.755358	0.450034	0.733858
Ndc1	2036.57	0.202476	0.0750671	2.69726	0.00699122	0.069631
Bub1	2053.74	0.170326	0.0680723	2.50213	0.0123448	0.100777
Bcas2	2073.51	-0.0450867	0.0615485	-0.732539	0.46384	0.74305
Ibtk	2075.51	-0.00835949	0.055344	-0.151046	0.879939	0.954875
Setdb1	2069.7	0.0394319	0.0568636	0.693448	0.488029	0.758622
Tmx1	2053.46	0.0272621	0.0545344	0.499907	0.617141	0.830085
Pds5b	2048.47	0.0937324	0.069379	1.35102	0.176689	0.462989
Tsnax	2081	0.181065	0.0586581	3.08679	0.00202328	0.030796
Carm1	2062.08	-0.0135552	0.0707357	-0.191632	0.848031	0.941025
Gtf2f1	2110.78	-0.0847917	0.0599155	-1.41519	0.157013	0.434075
9530068E07Rik	2065.12	-0.0712947	0.0642187	-1.11019	0.266919	0.571561
Psph	2121.53	0.296454	0.0822232	3.60548	0.000311572	0.00876103
Gfpt1	1996.35	0.122183	0.0765536	1.59604	0.110479	0.359115
Rbx1	2050.42	-0.0336362	0.0743631	-0.452324	0.651036	0.850473
Pde7a	1994.53	-0.0274742	0.0821361	-0.334496	0.738005	0.890978
Marcksl1	2097.85	-0.224316	0.142805	-1.57079	0.116232	0.369211
Aff3	2066.75	-0.0290932	0.0984673	-0.29546	0.767643	0.903139
Gimap1	2069.4	0.151283	0.0669277	2.2604	0.0237966	0.150414
Clspn	2062.51	-0.0212318	0.0669869	-0.316955	0.751278	0.897381
Itm2a	2030.33	0.196497	0.304127	0.646103	0.518213	0.776728
Mbd2	2049.08	-0.120424	0.0636887	-1.89082	0.0586487	0.251131
Mybl2	2111.2	-0.0960139	0.0795467	-1.20701	0.227427	0.52947
Sumo2	1992.52	0.464242	0.512176	0.906413	0.364717	0.669348
Msh2	2067.29	-0.280451	0.0703539	-3.98629	6.71152e-05	0.00304934
Pck2	2131.98	0.223217	0.117096	1.90626	0.056616	0.245781
Gar1	2110.06	-0.144261	0.104429	-1.38143	0.167148	0.450441
Scaf1	2061.24	-0.177642	0.0715641	-2.48227	0.0130547	0.105157
Rbm33	2051.82	-0.0326876	0.0550594	-0.593679	0.552727	0.794823
Letm1	2065.98	-0.105528	0.0590544	-1.78696	0.0739445	0.286667
Rpl31-ps8	2138.54	-0.047894	0.148799	-0.32187	0.747551	0.895835
Thoc1	2010.4	0.0657561	0.0894823	0.73485	0.462431	0.742926
Tmem167	2043.4	0.0935679	0.0787518	1.18814	0.23478	0.536934
Casp8ap2	2023.91	0.102723	0.0813898	1.26211	0.206911	0.503013
Trim44	2062.16	-0.0387957	0.0617463	-0.628308	0.529802	0.783497
Emc10	2078.3	-0.0954961	0.0704989	-1.35458	0.175553	0.461559
Pelp1	2080.92	-0.113201	0.0555978	-2.03608	0.0417427	0.208045
Tk1	2084.08	0.188223	0.0511921	3.6768	0.000236182	0.00719881
Cdk9	2067.32	-0.219061	0.055453	-3.95039	7.80232e-05	0.00339203
Mrpl3	2024.69	-0.0605753	0.0560987	-1.0798	0.280232	0.588453
Atf1	2029.5	-0.0242512	0.0516392	-0.469628	0.638621	0.844372
Hax1	2098.88	0.171196	0.0843246	2.0302	0.0423358	0.20988
Nutf2	2047.26	0.0969227	0.0490337	1.97666	0.0480806	0.225205
Ipo11	2015.43	0.236198	0.0618736	3.81742	0.000134855	0.0049127
Xrcc6	2068.99	0.14935	0.060699	2.4605	0.0138742	0.108867
Ube2q1	2046.02	0.062597	0.0457298	1.36884	0.171048	0.455392
D16Ertd472e	2018.95	-0.0897111	0.0529535	-1.69415	0.0902372	0.320829
Bst2	2134.78	-0.494068	0.110002	-4.49144	7.07449e-06	0.000654598
Pdpk1	2018.38	0.125129	0.0597557	2.094	0.0362597	0.19056
Xrcc5	1997.7	0.11044	0.0880761	1.25392	0.209872	0.506077
Rab14	2026.47	0.0120975	0.0729238	0.165892	0.868242	0.950584
Smarce1	2059.05	0.0495012	0.0578941	0.85503	0.392535	0.691412
Rrp7a	2054.93	-0.134302	0.0454877	-2.9525	0.00315211	0.041294
Rpl23a-ps3	2066.48	0.12494	0.0834738	1.49675	0.134458	0.399713
Bdp1	1981.32	0.234333	0.067499	3.47166	0.00051726	0.0125247
Ppp2r2a	2002.82	-0.220699	0.0484284	-4.55722	5.18357e-06	0.000528419
Cdc5l	2018.83	0.105183	0.0560221	1.87753	0.0604453	0.255225
Ddx52	1995.12	0.18496	0.0810321	2.28256	0.0224565	0.144214
Rps6ka3	1994.22	0.05587	0.0708061	0.789057	0.430079	0.719923
Sp110	2074.95	-0.0317197	0.0723335	-0.43852	0.661009	0.853817
Cabin1	2020.67	-0.0208212	0.0835011	-0.249353	0.803088	0.920335
Ap1g1	1999.45	0.077788	0.0616607	1.26155	0.207111	0.503105
Mllt1	2026.92	-0.056028	0.0503277	-1.11326	0.265595	0.570962
Nop9	2036.9	0.0446741	0.0736796	0.606329	0.544296	0.790193
Ap1m1	2008.08	-0.0237395	0.0610408	-0.388912	0.697341	0.870851
Ubxn1	2055.17	-0.123474	0.0785575	-1.57177	0.116004	0.369066
[truncated: 12,722 more rows]

## Sheet: TCox10AOX_vs_TCox10
gene_name	baseMean	log2FoldChange	lfcSE	stat	pvalue	padj
Eef1a1	189686	-0.129226	0.0666815	-1.93796	0.0526283	0.156282
mt-Co1	174219	0.0985145	0.106677	0.923481	0.355757	0.56033
Eef2	99555.5	-0.211568	0.0577985	-3.66044	0.000251785	0.00285323
Hsp90ab1	90826	-0.0210282	0.0560801	-0.374967	0.707685	0.834194
mt-Nd1	86074.5	0.185805	0.103931	1.78778	0.0738121	0.19736
Hspa8	80944.1	0.15066	0.0592388	2.54326	0.0109824	0.0510409
Rpsa	81552.5	0.217571	0.0629062	3.45865	0.000542884	0.00522775
Actb	80134.7	-0.227655	0.0615484	-3.6988	0.000216625	0.00253645
Rplp0	74853.1	0.103644	0.040582	2.55394	0.0106513	0.0498324
Npm1	68960.9	0.40805	0.11033	3.69844	0.000216927	0.00253725
Ncl	68040.7	0.185237	0.0804586	2.30226	0.0213203	0.0828379
Rpl4	67054.4	0.129756	0.0581974	2.22958	0.0257754	0.0945783
Ldha	53734.5	-0.0344207	0.0763939	-0.450569	0.652301	0.795798
mt-Cytb	52559.2	0.867444	0.0978438	8.8656	7.60938e-19	9.38957e-16
Tubb5	50812.7	0.0181412	0.0681703	0.266116	0.79015	0.88464
Pkm	47347.3	-0.0830741	0.0978276	-0.849189	0.395776	0.595513
Rpl7	46950.1	0.279888	0.102691	2.72553	0.00641988	0.0345256
Rps2	46779.6	0.0144509	0.0576967	0.250464	0.802229	0.890665
Hsp90aa1	46211.6	0.126459	0.0809251	1.56267	0.118131	0.273298
Rps4x	45495.4	0.24624	0.0843884	2.91793	0.00352358	0.0220903
Rplp1	45202.7	0.0206419	0.223629	0.0923043	0.926456	0.960059
Ptma	44384.4	0.0593386	0.0928756	0.638904	0.522885	0.700947
Rack1	43926.8	-0.0488327	0.0729195	-0.66968	0.503062	0.68582
Rpl3	43668.6	0.182395	0.0456806	3.99283	6.52882e-05	0.0010198
Pabpc1	42493.2	-0.210782	0.0457645	-4.6058	4.10892e-06	0.000119484
Rps3a1	42342.8	0.0580878	0.112347	0.517038	0.605129	0.761861
Ppia	42089.8	0.162566	0.0957227	1.6983	0.0894513	0.226265
Tpt1	41098.7	-0.137219	0.0959975	-1.4294	0.152889	0.323965
Rpl5	40892.6	0.149472	0.102533	1.45779	0.144899	0.312708
Eno1	40844.4	0.192566	0.132518	1.45312	0.146189	0.314432
Rpl13	40008.6	-0.132643	0.128791	-1.02991	0.303051	0.503966
Rpl41	40165.2	0.236111	0.116693	2.02335	0.0430374	0.135455
Rps3	38508.9	-0.0758502	0.118753	-0.638722	0.523004	0.700947
Eif5a	37113.6	-0.192188	0.0667115	-2.88088	0.00396562	0.0241855
Rpl6	37094.9	0.116292	0.0789429	1.47311	0.140721	0.306479
mt-Nd2	36038.4	0.612442	0.109759	5.57987	2.40695e-08	1.8162e-06
Tmsb4x	35509.1	0.0909665	0.118658	0.766629	0.443302	0.637582
mt-Nd5	34153.7	0.654488	0.101506	6.44781	1.13481e-10	2.03628e-08
Actg1	33902.1	0.0835014	0.0985545	0.847261	0.39685	0.596389
Hspd1	33747.2	0.143329	0.0730093	1.96315	0.0496282	0.15016
Rpl8	33739.9	-0.145705	0.0720595	-2.02201	0.0431749	0.135742
Rpl12	33600.1	0.0271858	0.11017	0.246761	0.805093	0.89223
Rps18	32880.5	-0.142727	0.155366	-0.918651	0.358278	0.562976
Rps26	32618	0.431079	0.0958882	4.49565	6.93588e-06	0.00017999
Rpl10	32236	0.292757	0.0640202	4.57289	4.8105e-06	0.000134566
Rps6	32053.6	0.067132	0.0717012	0.936274	0.349132	0.553928
Rps24	31842.7	0.158989	0.119991	1.325	0.18517	0.368763
Rps5	30986	0.0731243	0.094484	0.773933	0.438971	0.633237
Eif4g2	30681.4	0.195337	0.0845923	2.30916	0.0209348	0.08179
Eif4a1	30187.4	0.281506	0.0833533	3.37726	0.000732111	0.00662095
Rps8	29731.9	0.0467016	0.0633192	0.737559	0.460783	0.652024
Atp5b	29573.8	-0.0204124	0.0418414	-0.487851	0.625655	0.777065
Serbp1	29359.8	0.104469	0.0898231	1.16305	0.244808	0.441045
Tuba1b	29191.9	0.115332	0.0682393	1.69011	0.0910064	0.229096
Rps14	29342	-0.057631	0.163149	-0.353241	0.723907	0.84476
Hnrnpu	28940.8	-0.0736843	0.0643381	-1.14527	0.252099	0.44886
Eef1g	28796.6	-0.168139	0.0727646	-2.31072	0.0208482	0.0815852
Rpl18a	28884.2	0.199286	0.11383	1.75072	0.0799935	0.209323
Hnrnpa2b1	28385.2	0.21201	0.0628681	3.3723	0.000745421	0.00670013
Hnrnpa1	28377.8	0.400823	0.0945624	4.23871	2.24803e-05	0.000438694
Ybx1	27313.2	-0.385473	0.10887	-3.54067	0.000399106	0.00409515
Rpl10a	27395.4	0.0476338	0.0945686	0.503696	0.614475	0.768042
Cfl1	25977.8	0.0889007	0.064231	1.38408	0.166334	0.342971
Aldoa	25978.7	-0.0736768	0.102225	-0.720728	0.471077	0.66045
Rpl27a	25579.3	0.160836	0.105984	1.51755	0.129129	0.289241
Gzmb	25517	-0.403983	0.359383	-1.1241	0.26097	0.458313
B2m	25136.2	-0.213986	0.0975557	-2.19348	0.0282731	0.101072
Rps9	25026.2	-0.138228	0.0841541	-1.64255	0.100476	0.244595
Ptprc	24327	0.345767	0.0921256	3.75322	0.000174581	0.00217325
Set	24191.3	0.186552	0.0592607	3.14799	0.00164397	0.0123858
Pgk1	24125.9	0.0894179	0.109861	0.813917	0.415692	0.613257
Rps25	23928.1	0.158176	0.133161	1.18786	0.23489	0.430194
Rpl18	23812.7	-0.0549151	0.0918583	-0.597824	0.549957	0.718593
Rps20	23690.4	0.100561	0.109988	0.914289	0.360565	0.56501
mt-Rnr2	23165.2	0.101608	0.141097	0.720128	0.471446	0.660842
Rps7	23484	-0.0868396	0.161045	-0.539225	0.589731	0.749196
Rpl14	23465.9	-0.00150761	0.0602524	-0.0250215	0.980038	0.990404
Lcp1	23051	0.0802362	0.0681102	1.17804	0.238782	0.4345
Rpl32	23029.4	-0.00594975	0.0953529	-0.0623971	0.950247	0.973997
mt-Nd4	22882.7	0.672169	0.105142	6.39296	1.62702e-10	2.75173e-08
Cnbp	22710.5	0.173876	0.077012	2.25777	0.0239599	0.090165
Tfrc	22653.1	0.303335	0.0901046	3.36648	0.000761348	0.00678938
Ran	22483.3	-0.121314	0.0732582	-1.65598	0.0977255	0.240056
Atp5a1	22051.1	-0.119419	0.0502258	-2.37764	0.0174237	0.0715323
Ddx5	21687.8	0.0387129	0.051843	0.746733	0.455225	0.647417
Rpl26	21629.8	0.166945	0.125686	1.32828	0.184087	0.367177
Rps16	21104.5	0.0701444	0.124028	0.565555	0.571696	0.735631
Rps23	21058.1	0.0924292	0.0928875	0.995066	0.319704	0.523088
Pfn1	20753.7	-0.263239	0.0783815	-3.35843	0.000783862	0.00694385
Kpnb1	19964.3	0.0498417	0.066201	0.752884	0.45152	0.644341
Slc25a5	19967.9	0.0896227	0.0533586	1.67963	0.0930294	0.2324
Rpl19	20001.3	0.0616673	0.0816512	0.755253	0.450097	0.64329
Rps27a	19493.3	0.15028	0.345112	0.435453	0.663234	0.804353
Rps12	19898	0.0509223	0.123432	0.412552	0.679935	0.815505
Top2a	19518.2	0.562802	0.0951595	5.9143	3.33299e-09	3.606e-07
Rpl34	19843.6	0.0166401	0.17448	0.0953692	0.924022	0.958819
Eef1b2	19599.6	-0.0190329	0.074234	-0.256391	0.797649	0.887657
Rpl11	19565.3	-0.0424758	0.141073	-0.301091	0.763345	0.869406
Eif4g1	18936.7	-0.199316	0.0724478	-2.75117	0.00593833	0.032591
Irf4	18906.6	0.205947	0.102756	2.00424	0.0450446	0.140094
Hnrnpab	18670.6	-0.400051	0.112953	-3.54175	0.000397481	0.00408988
Mybbp1a	18381.2	-0.204309	0.0619474	-3.2981	0.000973401	0.00818752
Hspa9	18311	0.10397	0.0640821	1.62245	0.104708	0.252079
Mif	18442.4	-0.140493	0.11519	-1.21966	0.222592	0.415884
Nap1l1	18261.6	0.143262	0.0489691	2.92556	0.00343834	0.021676
Rpl15	18313.3	-0.0142732	0.118996	-0.119946	0.904526	0.947004
Rps15	18264.3	-0.130114	0.143998	-0.903581	0.366218	0.570033
Odc1	17967.8	-0.00995999	0.0806231	-0.123538	0.901681	0.945304
Rpl9	17992.8	0.0383494	0.0898491	0.426821	0.66951	0.808268
Rps17	17994.4	0.10574	0.135605	0.779769	0.435527	0.630494
Tpi1	18051.8	-0.0740449	0.119489	-0.619678	0.53547	0.708981
Pcna	17793.4	-0.0399982	0.0977258	-0.40929	0.682326	0.817037
Hspa5	17637.5	0.0697323	0.0596637	1.16876	0.242502	0.438465
Rpl31	17667.3	0.0641507	0.15442	0.415431	0.677826	0.814233
Hnrnpk	17450.8	0.149071	0.0612323	2.43452	0.0149115	0.0639533
Rps15a	17446.6	0.103715	0.128305	0.808344	0.418893	0.616051
Rps19	17197.4	-0.0799669	0.129927	-0.615478	0.538239	0.711239
Scd2	16956.7	-0.175273	0.123031	-1.42463	0.154264	0.325848
Eif3a	16312.3	0.140875	0.0795084	1.77183	0.0764234	0.202502
Rpl37a	16550.4	0.094222	0.134423	0.700939	0.483341	0.670972
Ddx21	16224.9	0.2442	0.0793861	3.07611	0.00209723	0.0149654
Coro1a	16123	-0.175794	0.113585	-1.5477	0.121695	0.278479
Rplp2	16117.7	-0.383315	0.120026	-3.19359	0.00140517	0.0109337
Eif4b	15962	0.0973184	0.0527619	1.84448	0.0651128	0.181315
Rpl28	15968.5	-0.220227	0.208621	-1.05563	0.291136	0.491134
Ipo5	15783.3	0.0913184	0.0579666	1.57536	0.115173	0.269121
Eif3c	15724.1	0.237581	0.0744926	3.18932	0.00142609	0.0110614
Cct8	15464.2	0.244742	0.052673	4.64645	3.377e-06	0.000102452
Rps13	15467.9	-0.0215748	0.0996831	-0.216434	0.82865	0.905438
Rps11	15342.4	-0.131989	0.0971995	-1.35792	0.174488	0.353769
Naca	14890.4	0.167314	0.0920212	1.81822	0.0690311	0.188621
Myh9	14631.2	-0.192643	0.0997353	-1.93154	0.0534158	0.157792
Rpl27	14881.3	0.185837	0.0942733	1.97126	0.0486946	0.148219
Cct2	14739.2	0.152817	0.0605725	2.52288	0.01164	0.0533337
Srrm2	14583	0.00518273	0.0768744	0.0674182	0.946249	0.971944
Calm1	14638.7	-0.0609027	0.0727478	-0.837176	0.402494	0.601351
G3bp1	14535.3	-0.124463	0.0625995	-1.98825	0.0467845	0.143954
Rcc2	14468.6	-0.210498	0.0799173	-2.63395	0.00843988	0.0421107
Rpl29	14513	0.354356	0.0956252	3.70568	0.000210828	0.00248967
Cct5	14338.2	0.153057	0.0474562	3.22522	0.00125875	0.00995842
Srsf1	14301.6	0.101777	0.0465757	2.18519	0.0288753	0.102509
Ddx3x	14226.7	0.465794	0.0733858	6.3472	2.19263e-10	3.50678e-08
Tcp1	14262	0.275405	0.0745279	3.69533	0.000219599	0.00256443
Actr3	14242.1	-0.0130539	0.0637657	-0.204717	0.837793	0.91131
Tpm3	14210.5	-0.125608	0.0622955	-2.01633	0.0437656	0.137248
Ccnd2	13847.8	-0.403859	0.0830639	-4.86202	1.16192e-06	4.29561e-05
Pa2g4	13994.6	-0.0147436	0.0617108	-0.238914	0.811172	0.895998
Rpl23	14129.2	0.215507	0.117157	1.83947	0.065846	0.182665
Ptbp1	13920	-0.151255	0.0531895	-2.8437	0.00445928	0.026404
Gbp2	14083.6	-0.0015223	0.126811	-0.0120045	0.990422	0.995292
Fasn	13666.9	-0.637994	0.0891229	-7.15858	8.15172e-13	2.99861e-10
Hmgb2	13856.9	0.373727	0.0928638	4.02446	5.71064e-05	0.000922353
Srsf3	13728.9	0.246333	0.0872044	2.82478	0.00473129	0.0276036
Caprin1	13644	0.110412	0.0514736	2.14502	0.0319511	0.110152
Mki67	13502.6	0.0795735	0.105116	0.757004	0.449047	0.642428
Gm23935	13276.7	0.195548	0.66453	0.294265	0.768556	0.872147
Calr	13515.5	-0.0526164	0.0752215	-0.699485	0.484249	0.671495
H3f3b	13576	0.232521	0.070838	3.28244	0.00102913	0.00856479
Nop56	13408.9	0.0204619	0.0744566	0.274817	0.783457	0.880787
Prpf8	13206.2	0.0211577	0.0926043	0.228474	0.819278	0.900086
Slc25a3	13339.9	-0.027431	0.0551899	-0.497029	0.619168	0.772268
Rpl36	13451.6	-0.158962	0.155998	-1.019	0.308202	0.509824
Cct7	13275.2	-0.0249781	0.0528066	-0.473011	0.636205	0.784934
Fau	13328	-0.0617933	0.0649124	-0.951949	0.341123	0.545594
Cct6a	13210.5	0.340058	0.0936493	3.63119	0.000282122	0.00311181
Anp32b	13252.6	-0.0493011	0.0977928	-0.504139	0.614164	0.767783
Arhgdia	13076.8	-0.44141	0.0795577	-5.5483	2.88454e-08	2.05039e-06
Il2ra	13065.1	0.135978	0.162558	0.83649	0.402879	0.601518
Shmt2	13009.2	-0.29764	0.0719874	-4.13462	3.55543e-05	0.000632583
Hnrnpf	12791.5	0.136035	0.0732731	1.85654	0.0633762	0.177826
Bzw1	12717.4	0.318629	0.0631014	5.04948	4.43025e-07	1.94587e-05
Ubb	12689.7	-0.069204	0.103921	-0.665927	0.505457	0.687875
Hnrnpa0	12419	-0.451706	0.158274	-2.85396	0.00431786	0.025795
Rps27	12669.4	0.186631	0.176762	1.05583	0.291045	0.491134
Hnrnpl	12403.8	-0.274326	0.0732691	-3.74409	0.000181049	0.00223287
Rpl35	12480.1	-0.0700504	0.147732	-0.474172	0.635377	0.784504
Cct4	12288	0.185394	0.0485463	3.81891	0.000134044	0.00175474
mt-Nd6	12268.8	0.87117	0.115307	7.5552	4.18208e-14	2.1219e-11
Cct3	12227.3	0.0505546	0.0524503	0.963857	0.335118	0.539784
Nfkb1	12095.7	-0.148857	0.101249	-1.47021	0.141506	0.307636
Rrm1	12096.7	0.18574	0.0672229	2.76305	0.0057264	0.0317001
Ssrp1	12129.8	-0.0113359	0.0549508	-0.206291	0.836563	0.910645
Eif3b	12113.2	-0.101338	0.0705709	-1.43597	0.15101	0.321233
Hnrnph1	12162.6	0.379665	0.0603788	6.28805	3.21486e-10	4.77813e-08
Btf3	12144.2	0.204321	0.0655605	3.11653	0.00182995	0.0134428
Mcm6	12013.4	-0.321492	0.0631668	-5.08957	3.58871e-07	1.63481e-05
Uba1	11960.6	-0.0413052	0.0659043	-0.626746	0.530826	0.705819
Ybx3	11767.8	-0.456785	0.0755381	-6.04708	1.47495e-09	1.74872e-07
Tardbp	11814.9	0.157069	0.0641914	2.44689	0.0144095	0.0623906
Atp1a1	11708.2	-0.473235	0.0972259	-4.86738	1.13087e-06	4.21255e-05
Rpl23a	11870.4	0.0538064	0.341187	0.157704	0.87469	0.929697
Mcm3	11742.9	-0.162904	0.0572062	-2.84766	0.0044042	0.0261621
Dnmt1	11627.8	-0.237375	0.0844192	-2.81186	0.00492552	0.0284212
Canx	11732.1	0.202195	0.0732079	2.76193	0.00574604	0.0317489
H2afz	11719.3	0.229687	0.11023	2.08372	0.037186	0.122405
Chd4	11459.4	-0.0484961	0.0814497	-0.595411	0.551568	0.719867
Ddb1	11343.2	-0.0259234	0.0669838	-0.387011	0.698748	0.828409
mt-Rnr1	11239.5	-1.04129	0.297579	-3.49919	0.000466666	0.00466159
Tkt	11394	-0.229317	0.0562263	-4.07847	4.5334e-05	0.000766717
Etf1	11367	0.289706	0.0612484	4.73001	2.24507e-06	7.40671e-05
Ywhaz	11295.1	0.0445988	0.0749716	0.594876	0.551926	0.719977
Rpl22	11314	0.0841088	0.151715	0.554386	0.579315	0.740811
Ywhae	11167.2	0.0555437	0.0822144	0.675596	0.499297	0.682958
Phgdh	11142.5	0.0133303	0.0974178	0.136836	0.89116	0.939477
Pcbp1	11049	-0.421012	0.0930168	-4.52619	6.00552e-06	0.000160082
Msn	10982.1	-0.161253	0.068412	-2.35709	0.0184186	0.0746175
Son	10885.7	-0.0100626	0.0832948	-0.120807	0.903844	0.946492
Rbm3	11025.6	0.1066	0.128796	0.827669	0.407858	0.606062
Eif4a2	10976.2	0.576707	0.0627841	9.18557	4.09365e-20	7.52924e-17
Sf3b1	10886.3	0.197113	0.0734775	2.68263	0.00730454	0.0380247
Mbnl1	10691.8	0.311827	0.126807	2.45907	0.0139299	0.0608754
Hnrnpm	10890.6	0.0477505	0.0588055	0.812006	0.416788	0.614299
Larp1	10746.2	-0.273019	0.0813562	-3.35585	0.000791225	0.00700065
Psat1	10813.5	0.197685	0.0684414	2.88838	0.00387231	0.0237712
Eif5	10655.6	-0.125797	0.0826838	-1.52142	0.128155	0.287961
Actr2	10712.8	0.117819	0.075533	1.55984	0.118798	0.274151
AI506816	10611.6	-0.244622	0.0708232	-3.45398	0.000552369	0.00528794
Hspa4	10603.8	0.000780436	0.0469102	0.0166368	0.986726	0.993682
Nono	10629.1	0.311616	0.0698064	4.46401	8.04396e-06	0.000196283
Hsp90b1	10535	0.256817	0.0764168	3.36074	0.000777352	0.00689449
Cad	10351.1	-0.565011	0.0960326	-5.88354	4.01589e-09	4.19077e-07
Rpl36a	10644.7	0.114466	0.175313	0.652924	0.513805	0.694215
Xpo1	10467.2	0.200996	0.0857735	2.34334	0.0191119	0.076813
Prdx1	10460.4	-0.0203417	0.116081	-0.175237	0.860894	0.922559
Sfpq	10370.8	-0.31269	0.066836	-4.67847	2.89027e-06	9.1457e-05
Ly6a	10505.7	-0.411777	0.09798	-4.20266	2.63794e-05	0.000500189
Prrc2a	10185.9	-0.475801	0.115264	-4.12792	3.66066e-05	0.000642756
Nolc1	10348.5	0.174581	0.0860279	2.02936	0.0424218	0.134149
Hdgf	10311.7	-0.0830635	0.0788168	-1.05388	0.291938	0.49154
Snx5	10231.1	0.183594	0.0708004	2.59312	0.00951103	0.0458557
Rps29	10380	-0.0482035	0.280423	-0.171895	0.86352	0.923775
Nop58	10156.5	0.265258	0.0568553	4.66548	3.07894e-06	9.59617e-05
Pdia3	10145.7	-0.121715	0.0643895	-1.89029	0.0587187	0.168156
Tmsb10	10185.3	-0.317364	0.261226	-1.2149	0.224404	0.417801
Sf3b3	10053.7	0.308325	0.0791143	3.89721	9.73056e-05	0.00137536
Dhx9	9968.82	0.15591	0.0691727	2.25393	0.0242005	0.0907228
Tfdp1	9915.35	-0.0177808	0.0505171	-0.351976	0.724857	0.845664
Rpl39	10083.4	0.211519	0.131985	1.6026	0.109023	0.259237
Eprs	9881.3	0.221984	0.0801066	2.77111	0.00558651	0.0312073
Mcm5	9856.43	-0.186599	0.0828467	-2.25234	0.0243007	0.0908247
Cdv3	9895.97	0.124432	0.0620791	2.0044	0.045027	0.140069
Eif1	9930.15	0.00976321	0.0774741	0.126019	0.899717	0.944388
Uhrf1	9809.03	-0.604261	0.075819	-7.96979	1.58946e-15	1.23091e-12
Hnrnpc	9894.39	0.308297	0.0575949	5.35285	8.65772e-08	5.13668e-06
Vars	9731.2	-0.547386	0.0878549	-6.23057	4.64754e-10	6.45131e-08
Mcm7	9826.23	-0.145995	0.0575227	-2.53805	0.0111472	0.0515949
Smc4	9715.25	0.338369	0.0792692	4.26861	1.96698e-05	0.000398105
Pfkp	9852.51	0.220489	0.117097	1.88296	0.0597053	0.169993
Hspe1	9827.53	0.44525	0.0862875	5.16007	2.46851e-07	1.2067e-05
Rpl37	9743.92	0.118697	0.0998315	1.18898	0.234449	0.429745
Srsf2	9588.6	-0.0388102	0.0532906	-0.728274	0.466446	0.657029
CT010467.1	9449.76	-0.292772	0.345589	-0.847168	0.396901	0.596406
Trim28	9586.23	-0.268937	0.0646014	-4.16302	3.1406e-05	0.00057476
Rpl30	9822.23	0.333249	0.461261	0.722475	0.470003	0.659564
Slc1a5	9656.09	0.13155	0.0777668	1.6916	0.0907224	0.228611
Ipo7	9551.98	0.243499	0.0716598	3.39799	0.00067882	0.00622703
P4hb	9571.74	-0.114709	0.0683818	-1.67748	0.0934495	0.233014
Ube2d3	9455.76	0.0346484	0.0540461	0.64109	0.521464	0.700034
Srsf6	9388.3	-0.160679	0.0699971	-2.29551	0.0217039	0.0840175
Eif3e	9361.22	0.0705017	0.136738	0.515597	0.606136	0.762416
Sept7	9382.86	0.465521	0.0852335	5.46172	4.7155e-08	3.0975e-06
Pabpc4	9283.03	-0.15507	0.0929911	-1.66758	0.0953992	0.236274
Anapc5	9293.99	-0.178099	0.0489217	-3.64049	0.000272119	0.00302414
Rpl17	9303.61	-0.334174	0.369023	-0.905564	0.365167	0.568819
Nsun2	9160.23	0.0523825	0.0434946	1.20434	0.228456	0.422141
Agfg1	9149.59	0.324669	0.0853243	3.80512	0.000141738	0.00183747
Gpi1	9246.73	-0.0925251	0.0862005	-1.07337	0.283105	0.483501
Abce1	9103.23	0.246387	0.0763292	3.22796	0.00124677	0.00988415
Eif2s2	9126.25	0.321595	0.0968872	3.31927	0.000902545	0.00769857
Rps21	9266.68	0.116249	0.144564	0.804138	0.421317	0.617658
Vcp	9066.25	-0.171693	0.0762501	-2.2517	0.024341	0.090902
Rap1b	8985.29	-0.0718813	0.0891509	-0.806288	0.420077	0.616671
Slfn2	9133.15	0.111158	0.116933	0.950609	0.341803	0.546306
Itgal	8885.51	0.0643652	0.106293	0.605542	0.544819	0.715226
Huwe1	8853.41	-0.0820647	0.0913284	-0.898567	0.368883	0.572185
Rsl1d1	8958.86	0.403493	0.0646335	6.24279	4.29833e-10	6.0234e-08
Hdlbp	8849.87	0.102742	0.0907861	1.13169	0.257764	0.45513
Rbm39	8837.58	0.245289	0.0671973	3.65028	0.000261951	0.0029445
Cd53	8848.91	0.231496	0.121383	1.90716	0.0565002	0.163683
Paics	8753.35	0.245097	0.0535684	4.57539	4.75324e-06	0.00013424
Irf8	8611.93	-0.543378	0.130285	-4.17068	3.03689e-05	0.000557863
Mat2a	8614.94	0.280634	0.0649909	4.31805	1.57417e-05	0.000334232
Gars	8645.86	0.0270651	0.0595757	0.454297	0.649615	0.794484
Kpna2	8502.86	0.506639	0.104446	4.85072	1.23013e-06	4.49133e-05
Psme3	8477.21	-0.0264971	0.0559732	-0.473388	0.635936	0.784748
Fkbp4	8519.91	0.0377877	0.0828638	0.456022	0.648374	0.793494
Tmpo	8418.84	0.00428666	0.0435764	0.0983711	0.921638	0.957446
Syncrip	8428.32	0.315286	0.0698936	4.51095	6.45394e-06	0.000170797
Cdc42	8400.99	0.00154297	0.0802386	0.0192297	0.984658	0.99292
Psmd2	8400.34	0.0243189	0.0562981	0.431966	0.665766	0.805997
Pgam1	8460.17	-0.144725	0.0910611	-1.58932	0.111988	0.263731
Acly	8397.76	-0.21217	0.0644341	-3.29282	0.000991863	0.00832531
Ddx39b	8415.72	0.0658825	0.0612588	1.07548	0.282161	0.482702
Rpl35a	8498.94	0.127992	0.131368	0.974302	0.329907	0.533668
Stip1	8364.89	-0.136563	0.058498	-2.33449	0.0195702	0.0781429
Rac2	8242.78	0.0146578	0.0676017	0.216826	0.828344	0.905438
Shisa5	8444.33	-0.243107	0.0783712	-3.10199	0.00192223	0.0139397
Eif4h	8220.83	-0.284879	0.0771344	-3.69328	0.00022138	0.00257501
Fus	8292.28	-0.0121257	0.0835917	-0.145059	0.884664	0.935865
Rpl38	8397.43	-0.0355422	0.251046	-0.141576	0.887415	0.937597
Ewsr1	8256.82	0.0325431	0.0986288	0.329955	0.741434	0.855912
Prmt1	8220.31	0.131484	0.0547011	2.40368	0.0162312	0.0680221
Atf4	8357.71	0.274327	0.141558	1.93791	0.0526346	0.156282
Nars	8266.45	0.312508	0.0809025	3.86278	0.000112104	0.00153015
Cdk4	8217.89	0.0403344	0.049501	0.814821	0.415175	0.612788
Tagln2	8119.13	-0.281436	0.0613594	-4.58669	4.50339e-06	0.000129167
Ivns1abp	8125.88	0.120131	0.0808116	1.48655	0.137133	0.301296
Cd6	8200.67	0.16475	0.10778	1.52857	0.12637	0.284705
Mcm4	8129.99	-0.149594	0.0676899	-2.20999	0.0271055	0.0980321
Srm	8072.35	-0.284337	0.0745047	-3.81637	0.00013543	0.00177131
Prrc2c	8029.77	0.0300859	0.10625	0.283161	0.777053	0.877261
Trbc2	8118.99	0.295453	0.0706854	4.17983	2.91721e-05	0.000541968
Il2rb	7872.32	-0.169266	0.109922	-1.53987	0.123591	0.281201
Slc7a5	7897.94	-0.194288	0.086916	-2.23535	0.0253943	0.0934526
Oaz1	7907.67	-0.473343	0.1275	-3.71248	0.000205235	0.00244358
Hcfc1	7816.94	-0.165053	0.0896035	-1.84204	0.0654689	0.181962
Tap1	7961.31	-0.335851	0.0644314	-5.21254	1.86272e-07	9.54984e-06
Eif3l	7906.32	0.198701	0.0726049	2.73675	0.006205	0.0336034
Igtp	7921.17	-0.254904	0.076173	-3.34639	0.000818726	0.00717922
Thrap3	7760.01	-0.0192735	0.072065	-0.267446	0.789125	0.884155
Rbbp7	7792.11	0.0887962	0.0612417	1.44993	0.147078	0.315513
Sf1	7780.63	-0.209886	0.0792213	-2.64937	0.00806428	0.0407772
Gas5	7838.47	0.731356	0.0875555	8.35306	6.65179e-17	6.52496e-14
Ptp4a2	7768.36	0.159826	0.0884018	1.80795	0.070614	0.191629
Tnpo1	7729.5	0.35173	0.0943696	3.72715	0.000193657	0.00234139
Rps12-ps3	7864.79	0.17276	0.160333	1.07751	0.281254	0.481995
Nup210	7580.87	-0.393313	0.057217	-6.87407	6.23968e-12	1.63948e-09
Fbl	7666.52	-0.0825239	0.0918101	-0.898855	0.36873	0.572128
Tubb4b	7575.08	-0.174552	0.0673257	-2.59265	0.0095239	0.0458856
Cap1	7528.71	-0.0365363	0.0589048	-0.62026	0.535086	0.708601
Dhx15	7510.03	0.121677	0.0598142	2.03425	0.0419267	0.13323
Anp32e	7513.71	0.336881	0.0677274	4.97408	6.55591e-07	2.64284e-05
Mcm2	7505.65	-0.203427	0.0509722	-3.99095	6.5809e-05	0.00102467
Flna	7432.66	-0.128737	0.0986892	-1.30447	0.192073	0.378082
Arf1	7497.77	-0.110839	0.065952	-1.68061	0.0928391	0.232193
Rpl7a	7424.07	-0.0553772	0.131322	-0.42169	0.673251	0.811386
Srsf7	7480.95	0.182599	0.081665	2.23595	0.0253551	0.0933386
Eef1d	7487.2	-0.0456587	0.0703476	-0.649044	0.51631	0.696498
Kars	7476.28	-0.00365767	0.073681	-0.049642	0.960408	0.979576
Srebf2	7455.29	-0.460437	0.0776188	-5.93203	2.99214e-09	3.34359e-07
Fam120a	7401.76	-0.0104356	0.0891567	-0.117047	0.906822	0.948005
Cnot1	7398.79	0.197754	0.0966229	2.04665	0.0406922	0.130588
Dek	7442.09	0.0425837	0.0663662	0.641648	0.521102	0.699816
Srgn	7499.57	0.368319	0.154512	2.38376	0.0171368	0.0706872
Nucks1	7431.91	0.0519426	0.0589709	0.880818	0.378417	0.579987
Cbx5	7393.48	-0.145678	0.0683276	-2.13205	0.0330027	0.112589
Snrnp200	7337.72	0.118746	0.0928245	1.27925	0.200808	0.388826
U2af2	7422.92	-0.0961878	0.0869421	-1.10634	0.268578	0.466957
C1qbp	7392.84	-0.195791	0.0948757	-2.06366	0.03905	0.126867
Smarca5	7346.77	0.0690636	0.0563032	1.22664	0.21996	0.412817
Arpc2	7340.03	0.0789538	0.0538568	1.466	0.14265	0.309032
Bclaf1	7359.09	0.13996	0.0555937	2.51755	0.0118173	0.0539664
Csde1	7312.31	0.170828	0.0638123	2.67704	0.00742763	0.0384824
Gspt1	7273.18	0.0424391	0.0592836	0.715867	0.474074	0.663305
Tln1	7187.8	-0.195804	0.0900557	-2.17426	0.0296859	0.104347
Wdr43	7282	0.296257	0.0562872	5.26331	1.41484e-07	7.57015e-06
Smc1a	7239.5	0.0775736	0.0678499	1.14331	0.252909	0.449598
Rab8b	7208.74	0.156759	0.104863	1.4949	0.134942	0.297681
Lck	7293.98	0.0804179	0.0643844	1.24903	0.211655	0.402884
Noc2l	7204.82	-0.0523154	0.0553305	-0.945509	0.344399	0.549083
Ikzf1	7239.49	0.153316	0.071006	2.15919	0.0308352	0.107285
Prkar1a	7164.55	-0.0178554	0.0668637	-0.267042	0.789437	0.88427
Cd5	7237.04	0.205098	0.106873	1.91908	0.0549744	0.161142
Sf3b2	7176.01	-0.0713204	0.075023	-0.950648	0.341783	0.546306
Ahcy	7185.35	0.0708909	0.0537021	1.32008	0.186809	0.370846
Satb1	7192.41	-0.0213663	0.261995	-0.081552	0.935003	0.965312
Chchd2	7186.03	-0.298443	0.135288	-2.20597	0.0273858	0.0987083
Topbp1	7116.62	0.0914829	0.0707965	1.2922	0.196289	0.383305
Matr3	7104.2	0.0773118	0.0856725	0.902411	0.366838	0.570374
Phb2	7116.42	-0.0892066	0.0719318	-1.24015	0.214918	0.40651
Eif3h	7117.74	-0.134925	0.0539197	-2.50234	0.0123376	0.0555156
Atp2a2	7010.61	-0.0409551	0.0819651	-0.499665	0.617311	0.770343
Ppp1ca	7059.65	-0.202409	0.0709006	-2.85483	0.00430596	0.0257343
Eif2s1	7054.39	0.183276	0.0706836	2.5929	0.00951691	0.0458669
Hnrnpdl	7080.12	0.275828	0.0846812	3.25725	0.00112496	0.00913506
Csnk1a1	6970.21	-0.0641423	0.0655129	-0.979079	0.327541	0.53095
Txn1	7004.86	-0.0881033	0.082073	-1.07348	0.283058	0.483501
Aebp2	6939.41	-0.0755175	0.0864808	-0.873229	0.382538	0.583766
Arhgef1	6932.01	-0.107882	0.0849163	-1.27045	0.203926	0.392949
Actn4	6870.08	-0.274191	0.0636633	-4.30689	1.65568e-05	0.000348522
Psme1	6970.52	-0.0347194	0.0562581	-0.617145	0.537139	0.71048
Ccdc50	6856.01	-0.0158294	0.110657	-0.143049	0.886251	0.936939
Snu13	6912.56	0.261178	0.0729063	3.58238	0.000340481	0.00362573
Lcp2	6882.03	0.609621	0.137125	4.44573	8.75957e-06	0.000209916
Eif3i	6901.75	0.153023	0.0651599	2.34843	0.0188526	0.0760411
Cltc	6835.16	0.150557	0.103734	1.45138	0.146675	0.314954
Myc	6814.08	-0.531419	0.0566172	-9.38617	6.22238e-21	1.52594e-17
Baz1b	6791.81	-0.0645983	0.0642258	-1.0058	0.314511	0.516948
Tomm70a	6770.83	0.2226	0.0502858	4.4267	9.56871e-06	0.000223483
2610507B11Rik	6716.92	-0.0415668	0.0763951	-0.544102	0.586371	0.746678
Snrpb	6742.43	-0.121699	0.0968212	-1.25695	0.208773	0.398791
Iars	6671.37	0.0817589	0.0762037	1.0729	0.283317	0.483507
Nup205	6668.62	0.180996	0.0759604	2.38277	0.0171828	0.0708001
Nasp	6752.51	0.10837	0.0859808	1.26039	0.207527	0.397651
Tcof1	6699.89	-0.24395	0.0939872	-2.59556	0.00944364	0.0456334
Ucp2	6626.55	-0.398025	0.0709314	-5.61141	2.00685e-08	1.61359e-06
Naa50	6719.43	-0.00787656	0.0650049	-0.121169	0.903557	0.946259
Usp1	6679.43	-0.0165626	0.0484112	-0.342124	0.732257	0.849987
Rbbp4	6636.67	0.00781703	0.0584353	0.133772	0.893583	0.940835
Gm10275	6701.37	-0.131765	0.166792	-0.789998	0.429529	0.625298
Mcl1	6648.37	-0.106558	0.0622475	-1.71184	0.0869253	0.22159
Rrm2	6648.02	-0.107883	0.0723648	-1.49082	0.136009	0.299632
Cse1l	6567.97	0.17707	0.0803918	2.20259	0.0276239	0.0993472
Eif3m	6637.85	0.147753	0.130972	1.12813	0.259267	0.456643
Mknk2	6556.31	-0.615362	0.0813496	-7.56441	3.89626e-14	2.1219e-11
Ddx39	6650.14	0.180496	0.0630181	2.8642	0.00418066	0.0252522
Psma7	6658.75	-0.107424	0.10361	-1.03682	0.29982	0.500626
Ssb	6615.09	0.225652	0.0815364	2.76749	0.00564892	0.0314128
Eif4a-ps4	6613.93	0.369119	0.10096	3.65609	0.000256091	0.0028941
Gart	6535.14	0.0275932	0.07431	0.371325	0.710395	0.835582
Slc7a1	6575.32	0.0509203	0.091774	0.554845	0.579001	0.74069
Tra2b	6569.8	0.257762	0.0548422	4.70006	2.60085e-06	8.38351e-05
Bsg	6604.13	-0.0455863	0.0816876	-0.558056	0.576806	0.739356
Pik3cd	6474.67	-0.0451627	0.0870612	-0.518747	0.603937	0.760556
Itk	6524.02	-0.0742231	0.102754	-0.722339	0.470086	0.659564
Pcbp2	6451.89	-0.133312	0.0632518	-2.10764	0.0350618	0.117463
Mdh2	6437.35	-0.149435	0.0594081	-2.5154	0.0118897	0.0541457
Cyfip2	6441.26	-0.0457212	0.0968485	-0.472089	0.636863	0.78543
Malat1	6416.39	0.417701	0.119448	3.49694	0.000470629	0.00469162
Ghitm	6459.67	0.0646027	0.0878036	0.735764	0.461875	0.652547
Sub1	6478.36	0.270641	0.100841	2.68383	0.00727831	0.0379493
Maz	6385.88	-0.295711	0.123101	-2.40217	0.0162979	0.0682241
Fkbp1a	6427.68	-0.22195	0.0726807	-3.05376	0.00225993	0.015782
Mthfd2	6425.83	0.231334	0.0885239	2.61324	0.00896887	0.04396
Tpr	6402.07	-0.101455	0.0725492	-1.39843	0.161985	0.336978
Supt16	6384.17	0.154931	0.0874003	1.77265	0.076286	0.202284
Gdi2	6356.72	0.0688349	0.0898358	0.76623	0.443539	0.637664
Ranbp2	6385.77	0.122619	0.0868547	1.41177	0.158016	0.330956
Rbpj	6302.95	0.254979	0.235887	1.08094	0.279724	0.480498
Eftud2	6376	-0.0531745	0.0614772	-0.864947	0.387068	0.587934
Atp5f1	6410	0.10749	0.0895221	1.20071	0.229865	0.423574
Heatr1	6328.23	0.338121	0.087261	3.87483	0.000106701	0.00147556
Fubp1	6338.31	0.0268335	0.0851123	0.315271	0.752556	0.862727
Gnl3	6351.66	0.423743	0.0637676	6.64511	3.02992e-11	6.85882e-09
Wdr1	6302.07	0.175857	0.0899526	1.95499	0.0505838	0.152238
Uba2	6315.4	0.186129	0.0467217	3.98378	6.78274e-05	0.0010396
Ptpn6	6319.63	0.0630163	0.0673724	0.935342	0.349612	0.554266
Hdac7	6262.76	0.0664752	0.127362	0.521938	0.601713	0.758729
Cs	6279.35	-0.0547478	0.0655059	-0.835769	0.403285	0.601697
Aars	6269.3	0.104625	0.0861084	1.21504	0.224349	0.417752
Snrnp70	6276.18	0.0360196	0.0968579	0.371881	0.709981	0.835332
Srsf11	6225.43	0.201419	0.0866066	2.32568	0.0200359	0.0793989
Thy1	6170.19	-0.198723	0.143588	-1.38398	0.166364	0.342984
Srsf10	6207.57	0.0951092	0.0614491	1.54777	0.121677	0.278479
Dkc1	6177.1	0.167901	0.0571208	2.9394	0.00328852	0.0209559
Rpl17-ps3	6198.64	0.0975667	0.227525	0.428818	0.668056	0.807442
Capzb	6169.82	-0.0965852	0.0434354	-2.22365	0.0261717	0.0956745
Ddx6	6138.54	-0.0148176	0.0682667	-0.217055	0.828165	0.905438
Nfkb2	6125.35	-0.541398	0.101517	-5.33309	9.65566e-08	5.63783e-06
Copa	6122.02	0.0174327	0.0688237	0.253295	0.80004	0.889242
Cacybp	6186.09	0.285032	0.0990302	2.87823	0.00399908	0.0243553
Suz12	6149.4	0.0144107	0.0688253	0.20938	0.834151	0.908697
Limd2	6148.86	-0.345664	0.124148	-2.7843	0.00536434	0.0302649
Anp32a	6216.75	0.178011	0.120226	1.48063	0.138705	0.303797
Mlec	6122.17	0.0111655	0.0523458	0.213302	0.831091	0.906732
Mdn1	6040.14	-0.0839837	0.0956061	-0.878434	0.379708	0.580893
Pds5a	6106.13	0.169814	0.0864518	1.96426	0.0494998	0.149895
Impdh2	6135.77	-0.234081	0.0514963	-4.54559	5.47829e-06	0.000148722
Papola	6096.15	0.0795722	0.077164	1.03121	0.302443	0.503518
Khsrp	6085.47	-0.407139	0.100247	-4.06135	4.87896e-05	0.000806998
Gm42047	6035.68	0.223459	0.44053	0.507249	0.61198	0.766106
[truncated: 14,260 more rows]
